# Supplementary material
Source: PubMed Central journal article supplement (PMC4120942)
Supplement: NIHMS592482-supplement-Supplementary_Data_Table_1.pdf [file NIHMS592482-supplement-Supplementary_Data_Table_1.pdf]

**Table S1. Chemistry data**

**Exposure A**

| Treatment | TNT (mg/L) |
|-----------|------------|
| 0.06      | 0.06       |
| 0.13      | 0.12       |
| 0.25      | 0.22       |
| 0.5       | 0.44       |
| 1         | 0.97       |
| 2         | 1.85       |

**Exposure B**

| Treatment | TNT (mg/L) |
|-----------|------------|
| 0.004     | 0.002      |
| 0.008     | 0.004      |
| 0.02      | 0.02       |
| 0.03      | 0.04       |
| 0.06      | 0.1        |
| 0.13      | 0.14       |

**Exposure C**

| Treatment | TNT (mg/L) |
|-----------|------------|
| 0.004     | 0.003      |
| 0.02      | 0.011      |
| 0.12      | 0.084      |
| 0.44      | 0.31       |
| 1.85      | 1.32       |
