# Supplementary material
Source: PubMed Central journal article supplement (PMC4120942)
Supplement: NIHMS592482-supplement-Supplementary_Data_Table_2.pdf [file NIHMS592482-supplement-Supplementary_Data_Table_2.pdf]

**Table S2:Differentially Expressed genes for all treatments**

| ProbeName | p        | FC ([0.004] | FC ([0.12] | v FC ([1.85] | v GeneSymbo  | RefSeqAccession |
|-----------|----------|-------------|------------|--------------|--------------|-----------------|
| DM11208P3 | 6.27E-11 | -2.759943   | -2.7923474 | 5.380822     |              |                 |
| DM02535P1 | 1.70E-09 | -1.0606657  | 1.0273825  | 3.0402067    |              |                 |
| DM04155P3 | 2.55E-09 | -1.1924013  | -1.8806249 | 9.2269945    | PHYPADRAFT   | XM_001770168.1  |
| DM07468P1 | 9.60E-08 | 1.5381198   | 1.2563615  | -2.4090626   |              |                 |
| DM05883P1 | 1.46E-07 | -4.164618   | -4.8205967 | 4.301197     |              |                 |
| DM02527P1 | 3.21E-07 | 1.1395643   | 1.4164004  | -2.7666986   | 4CL1         | NM_104046.2     |
| DM02984P3 | 4.10E-07 | -3.3932483  | -2.8041391 | 3.5808704    |              |                 |
| DM00627P3 | 9.03E-07 | -1.1801822  | -1.0782033 | 1.517806     | DERE\GG152   | XM_001971830.1  |
| DM04941P2 | 9.34E-07 | 3.4217396   | 2.583441   | -7.8798337   |              |                 |
| DM05895P1 | 1.02E-06 | -1.1882874  | 1.2120546  | 5.5948267    |              |                 |
| DM04500P1 | 1.71E-06 | 1.0675085   | 1.0226952  | 1.7178578    |              |                 |
| DM06833P1 | 1.87E-06 | 1.3033714   | 1.1701084  | -2.4367948   |              |                 |
| DM06311P3 | 1.90E-06 | -1.1561017  | 1.2087673  | 4.068534     |              |                 |
| DM12065P2 | 2.00E-06 | -1.8919256  | -1.8018091 | 1.4817731    |              |                 |
| DM04383P3 | 2.00E-06 | 1.4915718   | 1.6128143  | -1.5154971   |              |                 |
| DM14182P2 | 2.03E-06 | -1.4658037  | -1.6195599 | 1.7842569    |              |                 |
| DM05878P1 | 2.56E-06 | -21.22727   | -18.777668 | -2.150565    |              |                 |
| DM12524P2 | 2.72E-06 | -1.6908418  | -1.5050758 | 1.3265545    |              |                 |
| DM06672P1 | 2.72E-06 | -1.605482   | -1.4322116 | 1.8587458    |              |                 |
| DM09287P1 | 3.17E-06 | -2.0433156  | -2.8197997 | 2.7730072    |              |                 |
| DM03680P3 | 3.66E-06 | -1.1246079  | -1.0743667 | 1.3665518    | LOC1002145   | XM_002159411.1  |
| DM02756P2 | 4.23E-06 | 1.7839093   | 1.6517665  | -9.195115    |              |                 |
| DM10519P1 | 4.24E-06 | -1.760619   | -2.0117772 | 1.2575258    |              |                 |
| DM01138P4 | 4.71E-06 | -4.1095653  | -5.176502  | -1.0499051   |              |                 |
| DM12878P1 | 5.09E-06 | -1.1096499  | -1.0598359 | 1.3923161    | SQRDL        | NM_001086609.1  |
| DM13474P3 | 5.36E-06 | 2.7713358   | 3.6485147  | -1.2627203   |              |                 |
| DM02283P1 | 5.50E-06 | -2.1779606  | -1.7965782 | 1.873909     | ISCW_ISCWC   | XM_002416102.1  |
| DM00830P3 | 6.16E-06 | -1.0062548  | 1.0857829  | -1.3859134   | GBE1         | NM_001094899.1  |
| DM10359P4 | 6.62E-06 | -1.9974284  | -1.7927076 | 1.4232419    |              |                 |
| DM05321P2 | 8.75E-06 | 1.0863507   | -1.0312109 | 2.042937     |              |                 |
| DM01475P1 | 9.34E-06 | -1.4084876  | -1.6975373 | 3.6587646    |              |                 |
| DM10284P1 | 1.06E-05 | -1.0460366  | -1.1227529 | -1.8256786   |              |                 |
| DM10619P4 | 1.17E-05 | 1.0788723   | -1.2893786 | -1.6193746   |              |                 |
| DM03807P3 | 1.17E-05 | 3.7646604   | 5.919261   | 1.4645915    | CG10663      | NM_001104123.1  |
| DM14629P1 | 1.18E-05 | -1.3273455  | -1.1953995 | 1.8293389    |              |                 |
| DM01742P2 | 1.28E-05 | -8.760819   | -9.885135  | -4.6936107   |              |                 |
| DM04583P2 | 1.32E-05 | -1.6430008  | -1.826746  | 1.222703     |              |                 |
| DM06323P1 | 1.33E-05 | -1.3403641  | -1.4857265 | 1.245902     |              |                 |
| DM00887P1 | 1.39E-05 | 1.1215512   | 1.2225754  | 1.4944582    | AAEL_AAEL01  | XM_001664052.1  |
| DM02677P3 | 1.58E-05 | 2.0984287   | 2.2857091  | 1.6785382    |              |                 |
| DM06446P2 | 2.07E-05 | -1.1657629  | -1.217079  | -1.537165    | LOC1002103   | XM_002166106.1  |
| DM12834P1 | 2.16E-05 | -4.809301   | -4.655242  | -2.2097611   |              |                 |
| DM06825P2 | 2.29E-05 | 1.3981372   | 1.236169   | -2.3614647   |              |                 |
| DM02343P3 | 2.51E-05 | -1.019922   | -1.1327271 | -1.2950282   | DYAK\GE169   | XM_002100305.1  |
| DM03643P3 | 2.79E-05 | 1.1078212   | 1.0087512  | -1.3685321   | LOC413006    | XM_396457.1     |
| DM02649P3 | 2.95E-05 | 1.4262251   | 1.7039545  | -1.3441769   | CPIPJ_CPIJ01 | XM_001857207.1  |
| DM05914P3 | 3.41E-05 | -2.525613   | -2.3639855 | 1.2074122    |              |                 |

|           |          |            |            |            |             |                |
|-----------|----------|------------|------------|------------|-------------|----------------|
| DM01718P3 | 3.88E-05 | 1.3204808  | 1.14717    | -5.338226  | DHRS2       | NM_027790.2    |
| DM06975P4 | 3.92E-05 | 1.4603153  | 1.4188899  | -2.08512   |             |                |
| DM00246P1 | 4.01E-05 | 1.6199424  | 1.6662792  | -2.2360036 | TH          | NM_012740.3    |
| DM09378P2 | 4.05E-05 | 1.1219571  | -1.0006176 | -1.4001633 |             |                |
| DM07384P3 | 4.06E-05 | -1.1145767 | -1.0330137 | 2.9658747  | BM1_01955   | XM_001891863.1 |
| DM10825P2 | 4.38E-05 | 1.4231066  | 1.2538704  | -2.4399369 |             |                |
| DM08360P3 | 4.42E-05 | -10.11818  | -14.929511 | -1.3916597 |             |                |
| DM04894P2 | 4.44E-05 | -2.98709   | -2.887112  | -1.524819  |             |                |
| DM02570P3 | 5.17E-05 | -1.446101  | -1.3322574 | 2.271027   | DVIR\GJ2084 | XM_002049231.1 |
| DM14321P1 | 5.33E-05 | 1.0835549  | 1.4796002  | -1.1639285 |             |                |
| DM03011P2 | 5.41E-05 | 1.2927392  | 1.4048798  | 1.5294459  | YALIOF05962 | XM_505057.1    |
| DM11035P1 | 5.64E-05 | 1.3856193  | 1.558598   | -2.1148248 |             |                |
| DM03806P2 | 5.67E-05 | 1.514652   | 2.5873322  | -1.6172004 | SLC34A1     | NM_001082673.1 |
| DM07144P1 | 5.88E-05 | -2.123621  | -2.6190143 | 1.0928239  |             |                |
| DM02051P3 | 5.89E-05 | -1.1410822 | -1.2352061 | -1.553884  | PROSBETA5   | NM_001126201.2 |
| DM03214P3 | 6.02E-05 | 1.2301322  | 1.5786428  | -1.3144486 |             |                |
| DM08870P2 | 6.04E-05 | -1.0607793 | -1.3378669 | 2.6528487  |             |                |
| DM15214P1 | 6.46E-05 | 1.0037177  | 1.0764732  | 1.9785243  |             |                |
| DM06858P3 | 6.46E-05 | 1.3469169  | 1.4503435  | -1.9501159 |             |                |
| DM07564P2 | 6.93E-05 | 1.0062374  | -1.0262979 | -1.8896575 |             |                |
| DM07162P2 | 7.54E-05 | 1.786947   | 1.5982336  | -5.1880774 |             |                |
| DM11127P3 | 7.60E-05 | 1.0323795  | 1.0096531  | -1.169675  |             |                |
| DM07929P1 | 7.67E-05 | 1.050143   | 1.1070286  | 1.8612905  |             |                |
| DM02279P3 | 7.70E-05 | 1.0438557  | 1.0520304  | -1.8021985 |             |                |
| DM07273P2 | 7.77E-05 | 1.3526461  | 1.659563   | 1.8640025  |             |                |
| DM12614P2 | 7.78E-05 | -9.769839  | -13.005275 | -2.700782  |             |                |
| DM03878P1 | 7.81E-05 | -2.822724  | -2.2613485 | 2.4889314  | ISCW_ISCWC  | XM_002416102.1 |
| DM01171P1 | 8.11E-05 | -1.1698935 | -1.0648328 | 1.417521   | P45071B38   | XM_001847350.1 |
| DM06005P2 | 8.31E-05 | 1.2908304  | 1.4483861  | 1.6460793  |             |                |
| DM10085P1 | 8.65E-05 | -1.7516614 | -1.7558584 | 1.2603364  |             |                |
| DM04071P2 | 8.72E-05 | 1.3385941  | 1.4911865  | -1.3101466 |             |                |
| DM02218P1 | 9.00E-05 | -2.4509752 | -2.8884215 | 1.1808811  |             |                |
| DM10627P4 | 9.83E-05 | 1.0545286  | -1.0197022 | -1.3233207 |             |                |
| DM14090P1 | 1.06E-04 | -1.0324613 | 1.1231747  | -1.9853314 |             |                |
| DM13062P1 | 1.10E-04 | -1.6793051 | -1.6075836 | 1.3994838  |             |                |
| DM08671P3 | 1.12E-04 | 1.0988716  | -1.1010838 | -1.5483732 |             |                |
| DM10469P3 | 1.15E-04 | 1.0980126  | 1.2858449  | 1.3283947  |             |                |
| DM10410P3 | 1.20E-04 | 1.1063554  | 1.0245504  | 1.9757987  |             |                |
| DM13577P3 | 1.22E-04 | -1.2763536 | -1.0727887 | 1.4110458  | LOC1001622  | XM_001944913.1 |
| DM08394P1 | 1.24E-04 | 1.1532911  | 1.3807741  | 2.21997    |             |                |
| DM02251P3 | 1.26E-04 | 1.178422   | 1.2363586  | -1.911321  |             |                |
| DM11721P3 | 1.28E-04 | 1.2096628  | 1.3578106  | 3.1788921  |             |                |
| DM02248P1 | 1.28E-04 | 1.9269016  | 2.3891885  | -2.9472487 | DPER\GL146  | XM_002022622.1 |
| DM04060P2 | 1.31E-04 | 1.7625442  | 2.0375159  | -1.5950813 |             |                |
| DM02402P3 | 1.38E-04 | 1.1561536  | 1.2297173  | 2.2530336  | POPTRDRAFT  | XM_002337564.1 |
| DM01842P2 | 1.44E-04 | 1.180625   | 1.1619054  | 1.5946344  | RHO         | XM_001651947.1 |
| DM10923P2 | 1.48E-04 | -1.0246334 | -1.2437596 | -1.4447641 |             |                |
| DM12306P2 | 1.50E-04 | 1.2262818  | 1.1548153  | -1.7520344 |             |                |
| DM09823P1 | 1.52E-04 | 1.0800526  | 1.1835941  | -1.3723774 |             |                |
| DM10407P1 | 1.64E-04 | -1.0790193 | -1.1548756 | -1.2929529 |             |                |

|           |          |            |            |            |              |                |
|-----------|----------|------------|------------|------------|--------------|----------------|
| DM01541P2 | 1.69E-04 | 1.0055608  | -1.0473229 | -1.3377165 | AGAP_AGAP0   | XM_318051.4    |
| DM04845P1 | 1.73E-04 | -1.1159313 | -1.12496   | -1.2646748 | LOC1001191   | XM_001602923.1 |
| DM04860P3 | 1.74E-04 | -1.7529043 | -1.5617195 | 1.570794   |              |                |
| DM14922P3 | 1.78E-04 | 1.7843168  | 2.646507   | -1.2027683 | TTHERM_002   | XM_001023862.2 |
| DM12183P2 | 1.84E-04 | 2.0153675  | 2.6241179  | 1.8651845  |              |                |
| DM11775P4 | 1.85E-04 | 2.3715768  | 2.1964173  | -1.741632  |              |                |
| DM05418P2 | 1.90E-04 | -2.059312  | -1.7966956 | 1.925087   |              |                |
| DM02831P3 | 1.94E-04 | 2.933074   | 3.5415688  | 2.3761384  | LOC789799    | XM_001256447.2 |
| DM06954P2 | 1.95E-04 | -1.091051  | 1.2271882  | 1.3425599  |              |                |
| DM06319P2 | 1.97E-04 | 2.3898652  | 3.769371   | 1.0898834  | SNOG_05978   | XM_001796314.1 |
| DM00151P3 | 2.07E-04 | 1.0665944  | 1.0923153  | -1.3256345 | WEE2         | NM_001105558.1 |
| DM09700P1 | 2.11E-04 | 1.2589954  | 1.286389   | 1.0104722  |              |                |
| DM04344P1 | 2.18E-04 | -1.4967417 | -1.6413057 | 1.3791366  |              |                |
| DM12125P1 | 2.29E-04 | -1.0391217 | -1.0985721 | -1.8045621 |              |                |
| DM05361P1 | 2.33E-04 | 1.1348146  | 1.087491   | -1.8451772 |              |                |
| DM00157P1 | 2.33E-04 | -1.0821681 | -1.0892599 | -1.6768607 | NEMVEDRAFT   | XM_001634071.1 |
| DM07717P2 | 2.36E-04 | -1.0117501 | -1.5450557 | -1.1067564 |              |                |
| DM14660P1 | 2.39E-04 | 1.4502697  | 1.6811031  | 1.9247266  |              |                |
| DM12133P2 | 2.45E-04 | -3.6621506 | -4.403198  | -1.7628022 |              |                |
| DM09033P3 | 2.45E-04 | -1.0817852 | -1.0932845 | 1.2935737  |              |                |
| DM08162P2 | 2.49E-04 | -2.1870985 | -2.209822  | 1.3968948  |              |                |
| DM14788P2 | 2.55E-04 | -1.2758837 | -1.3139454 | 1.5038527  |              |                |
| DM12730P3 | 2.57E-04 | 1.2503748  | 1.3575228  | 1.3353739  |              |                |
| DM01117P1 | 2.57E-04 | -1.3699586 | -1.2865993 | -1.9845194 | SNRPD1       | NM_001004780.1 |
| DM11662P4 | 2.69E-04 | -1.2603368 | -1.1991854 | -1.589369  |              |                |
| DM02047P1 | 2.70E-04 | -1.1970271 | -1.1356496 | 1.2846155  |              |                |
| DM11644P3 | 2.87E-04 | 1.6557542  | 1.7420121  | 1.1610917  |              |                |
| DM06131P3 | 3.05E-04 | 1.2517984  | 1.1786027  | 1.5574948  | RHO          | XM_001651947.1 |
| DM03428P1 | 3.06E-04 | 1.1759993  | -1.8877748 | 1.2809447  | LOC1000676   | XM_001504717.2 |
| DM11986P3 | 3.07E-04 | -1.1294622 | -1.3169993 | -1.4958037 | CANX         | XM_001150972.1 |
| DM00841P3 | 3.14E-04 | -1.0182365 | 1.0267743  | -1.2742457 | LOC579320    | XM_001189637.1 |
| DM01899P2 | 3.16E-04 | -1.2630428 | -1.2927924 | -1.7086422 | SF3B3        | NM_001077851.1 |
| DM14688P3 | 3.22E-04 | 1.9513547  | 2.4527876  | -2.8396704 | CPIPJ_CPIJOC | XM_001844941.1 |
| DM12798P2 | 3.24E-04 | -1.0293853 | -1.2976949 | 2.6405118  |              |                |
| DM06630P1 | 3.25E-04 | 1.1603283  | 1.4103804  | -1.9760731 |              |                |
| DM08218P2 | 3.34E-04 | -2.1422284 | -2.3017223 | -1.0810096 |              |                |
| DM10534P3 | 3.36E-04 | -1.1028742 | 1.1240357  | 1.303402   |              |                |
| DM00247P2 | 3.45E-04 | -1.1938937 | -1.1918421 | -1.5816052 | PSMB7        | NM_001094066.1 |
| DM07782P1 | 3.51E-04 | 1.5962372  | 2.2742064  | 1.3446791  |              |                |
| DM14028P1 | 3.58E-04 | -1.3171508 | -1.0830398 | 1.2284662  |              |                |
| DM01990P3 | 3.58E-04 | 1.0593637  | -1.1511024 | -1.3894106 | DPER\GL176   | XM_002018218.1 |
| DM01567P2 | 3.61E-04 | -1.0521977 | -1.2294436 | 2.3276007  |              |                |
| DM04051P3 | 3.62E-04 | -1.073539  | -1.1174557 | -1.4360815 | LOC1001656   | XM_001949345.1 |
| DM05898P3 | 3.63E-04 | -1.0504296 | -1.1333044 | -1.4321207 | CG3308       | NM_142706.3    |
| DM00432P1 | 3.71E-04 | 1.1609117  | -1.0950074 | -1.3691803 | GLYG         | NM_001139830.1 |
| DM14060P2 | 3.83E-04 | -1.0820316 | -1.0074687 | 1.2963109  |              |                |
| DM03535P3 | 3.84E-04 | 1.0391955  | -1.0355301 | -1.6832722 | LOC1000137   | XM_001363834.1 |
| DM06753P4 | 3.85E-04 | 1.2314345  | 1.3481178  | 2.2040827  |              |                |
| DM11316P2 | 3.89E-04 | 1.6907603  | 1.9694351  | 3.2580879  |              |                |
| DM04806P2 | 3.93E-04 | -1.3181828 | -1.2375506 | 1.4400563  |              |                |

|           |          |            |            |            |                            |
|-----------|----------|------------|------------|------------|----------------------------|
| DM04214P1 | 3.97E-04 | -1.0138388 | -1.1303171 | -1.1848752 |                            |
| DM11466P1 | 3.98E-04 | -1.0396234 | -1.1822493 | -1.6542199 |                            |
| DM05392P3 | 4.09E-04 | 1.8526574  | 1.3830485  | -3.1052299 |                            |
| DM10582P4 | 4.15E-04 | 1.0518641  | 1.0982547  | -1.5290079 |                            |
| DM01862P3 | 4.24E-04 | -1.1914725 | -1.4070522 | 1.1815519  | DANA\GF204.XM_001963438.1  |
| DM10371P2 | 4.25E-04 | -1.230617  | -1.4568942 | 1.1546569  |                            |
| DM09670P1 | 4.29E-04 | 1.7058614  | 2.987067   | 2.6516113  |                            |
| DM12820P3 | 4.44E-04 | -1.2284331 | -1.1074934 | -1.5435088 |                            |
| DM01011P1 | 4.50E-04 | 1.0231992  | -1.1745687 | -1.4858453 |                            |
| DM13483P1 | 4.51E-04 | -1.0398334 | 1.0724307  | 1.3037952  |                            |
| DM02794P2 | 4.54E-04 | -1.0438383 | -1.1724586 | -1.4484206 | DPER\GL138(XM_002020059.1  |
| DM08350P1 | 4.62E-04 | 1.6592749  | 3.3473861  | 4.679815   |                            |
| DM07997P2 | 4.81E-04 | -1.4763888 | 1.0461186  | 1.3819065  |                            |
| DM06677P2 | 4.90E-04 | -1.0216479 | 1.133035   | 1.5080212  |                            |
| DM13311P1 | 4.91E-04 | -1.070114  | 1.0597417  | -1.3012115 |                            |
| DM01263P3 | 4.97E-04 | -1.0074168 | -1.1464964 | -1.2242116 | DANA\GF226.XM_001965663.1  |
| DM04648P3 | 5.05E-04 | 1.0771234  | -2.0851138 | -1.4351063 |                            |
| DM00347P2 | 5.15E-04 | -1.8041885 | -1.6111535 | 1.5255934  | ABC XM_001649689.1         |
| DM06862P3 | 5.25E-04 | -1.4805272 | -1.2001287 | 1.4095694  |                            |
| DM03030P1 | 5.29E-04 | 1.1323694  | -1.0110602 | -1.3395884 | LOC1002115:XM_002155136.1  |
| DM08531P2 | 5.30E-04 | 2.2357588  | 2.4420245  | 2.1016858  |                            |
| DM00140P1 | 5.45E-04 | 1.048817   | -1.0765457 | -1.2759066 | FLII XR_015089.1           |
| DM02208P3 | 5.52E-04 | -1.2408631 | -1.1699476 | 1.1287239  | DVIR\GJ1575.XM_002057934.1 |
| DM08438P1 | 5.63E-04 | -1.0056198 | -1.0002964 | -1.3049779 |                            |
| DM08940P2 | 5.63E-04 | -1.0316523 | 1.7171946  | 1.0945407  |                            |
| DM01089P4 | 5.65E-04 | 1.0855907  | -1.1561352 | -1.4019068 | BTK29A XM_001842404.1      |
| DM11411P3 | 5.71E-04 | -1.0604472 | 1.5136081  | -6.7368927 |                            |
| DM05352P1 | 5.72E-04 | -1.0265374 | -1.0812945 | -1.4430137 |                            |
| DM03926P2 | 5.74E-04 | 1.2114491  | 1.0175933  | 1.9931761  | LOC663265 XM_969321.2      |
| DM13003P2 | 5.77E-04 | 1.3658315  | 1.420675   | -3.0013633 |                            |
| DM00452P3 | 5.99E-04 | -1.0197281 | -1.0502385 | -1.5309178 | LOC412308 XM_395769.3      |
| DM01633P2 | 6.02E-04 | 1.0031395  | -1.2259653 | -1.3557504 | DWIL\GK127.XM_002074169.1  |
| DM07401P1 | 6.06E-04 | 1.6746778  | -1.7371112 | 3.0359395  |                            |
| DM02807P4 | 6.15E-04 | 1.079833   | -1.0106269 | -1.500665  | LOC579937 XM_780026.2      |
| DM00042P4 | 6.16E-04 | 1.1355422  | 1.0079998  | -1.3653448 | DMOJ\GI2215.XM_002001067.1 |
| DM11339P2 | 6.16E-04 | 1.1332629  | -1.0486339 | -1.5356222 |                            |
| DM10971P1 | 6.18E-04 | -1.0127189 | -1.2708088 | -1.8850259 |                            |
| DM11155P2 | 6.21E-04 | 1.0836182  | 1.168728   | 1.4238273  |                            |
| DM03184P1 | 6.22E-04 | 1.2940218  | 1.8229831  | 2.0116935  |                            |
| DM09470P1 | 6.23E-04 | 1.015295   | -1.1714159 | -1.286919  |                            |
| DM08407P1 | 6.24E-04 | 1.316336   | 1.9091508  | 3.9475336  |                            |
| DM02555P3 | 6.34E-04 | -1.0712482 | -1.1136044 | -1.5001011 | LOC410040 XM_393525.3      |
| DM14575P1 | 6.36E-04 | -1.053584  | -1.9019923 | -1.01668   |                            |
| DM11164P1 | 6.36E-04 | -1.1443001 | -1.0866597 | -1.4571897 |                            |
| DM10913P2 | 6.42E-04 | -1.0527542 | -1.0805855 | -1.5355204 |                            |
| DM09537P2 | 6.44E-04 | 1.1486206  | 1.3113307  | 1.619388   |                            |
| DM03628P2 | 6.45E-04 | -1.1309608 | 1.1104361  | 1.4355099  | AGAP_AGAP0 XM_307608.4     |
| DM02190P4 | 6.50E-04 | -1.0185422 | -1.0599993 | -1.3747876 | LOC1001902.XM_002200552.1  |
| DM07140P3 | 6.62E-04 | 1.3911968  | 1.2722454  | -1.0262524 |                            |
| DM00292P2 | 6.75E-04 | -1.1861241 | -1.2291116 | -1.3822654 | BRAFLDRAFT.XM_002608112.1  |

|           |            |            |            |            |            |                |
|-----------|------------|------------|------------|------------|------------|----------------|
| DM05978P2 | 6.77E-04   | -2.525568  | -1.74113   | 2.3943768  | AKR        | NM_001162166.1 |
| DM03055P2 | 6.82E-04   | 1.2234665  | 1.1242726  | 1.4029984  |            |                |
| DM09384P4 | 6.87E-04   | -1.1814387 | 1.1475185  | 2.2118337  |            |                |
| DM01124P2 | 6.91E-04   | -1.0532141 | -1.3693182 | -1.3819026 |            |                |
| DM10693P4 | 6.95E-04   | -1.008241  | -1.112981  | -1.2714516 |            |                |
| DM01919P3 | 7.39E-04   | -1.2342219 | -1.2241142 | -1.5085225 | LOC578192  | XM_001190853.1 |
| DM09305P1 | 7.42E-04   | 1.09454    | 1.0600431  | -1.3138427 |            |                |
| DM00340P3 | 7.47E-04   | -1.1637362 | -1.0874486 | -1.6175313 | PABN1      | NM_001044179.1 |
| DM14968P3 | 7.88E-04   | 1.7148908  | 1.6045673  | 1.320591   |            |                |
| DM05838P1 | 7.88E-04   | -2.494401  | -1.6443688 | -4.5946593 |            |                |
| DM05207P1 | 7.89E-04   | -1.9983519 | -2.3575456 | 1.1112951  |            |                |
| DM02783P3 | 7.91E-04   | -1.0319442 | -1.0497063 | 1.2810932  |            |                |
| DM09640P3 | 8.08E-04   | 2.441501   | 3.2610638  | 2.6627305  |            |                |
| DM01799P1 | 8.09E-04   | 1.0591799  | 1.2164748  | 1.5068575  | TRIADDRAFT | XM_002108789.1 |
| DM15218P1 | 8.17E-04   | -1.0299445 | 1.0945278  | -1.2178909 |            |                |
| DM00091P1 | 8.19E-04   | -1.0055124 | -1.091953  | -1.5247555 | LOC1001231 | XM_001607649.1 |
| DM05376P1 | 8.20E-04   | -1.0016937 | 1.1694522  | 1.9505429  |            |                |
| DM06944P1 | 8.27E-04   | 1.4066575  | 1.3102087  | 1.2170203  |            |                |
| DM02238P2 | 8.29E-04   | 2.454926   | 2.647914   | 1.74854    |            |                |
| DM01722P2 | 8.36E-04   | -1.3027755 | -1.291597  | 1.2628255  | LOC1001671 | XM_001951607.1 |
| DM06127P1 | 8.42E-04   | 1.5384744  | 1.761562   | 2.0743809  | AGAP_AGAP0 | XM_308594.4    |
| DM09680P3 | 8.48E-04   | -1.0575846 | 1.2377375  | 1.6525604  |            |                |
| DM02845P3 | 8.52E-04   | -1.1268562 | -1.3482316 | -1.5467621 |            |                |
| DM13155P2 | 8.56E-04   | 1.0227348  | 1.1865882  | 1.9246937  |            |                |
| DM07683P1 | 8.57E-04   | 4.095996   | 5.5623503  | 6.178445   |            |                |
| DM06375P1 | 8.79E-04   | -1.0177982 | -1.048747  | -1.4363205 | NEMVEDRAFT | XM_001630386.1 |
| DM01339P1 | 8.85E-04   | 1.1460918  | 1.1508029  | 1.2972442  | SUOX       | NM_001029564.2 |
| DM11402P2 | 8.88E-04   | 1.135111   | 1.0686044  | -1.2410042 |            |                |
| DM04465P4 | 8.91E-04   | 1.0700396  | -1.020171  | 1.3242831  |            |                |
| DM07685P2 | 8.97E-04   | 1.4900165  | 1.4747994  | 1.2808607  |            |                |
| DM00206P2 | 8.98E-04   | -1.1900035 | -1.2508888 | -1.138372  | GALNT7     | XM_001865749.1 |
| DM07548P1 | 9.15E-04   | 1.2022085  | 1.2512285  | 1.3526641  |            |                |
| DM02900P3 | 9.18E-04   | -1.2026044 | -1.1633329 | -1.9649729 |            |                |
| DM04808P4 | 9.21E-04   | -1.1336986 | -1.1401964 | -1.7133235 | H2AFV      | NM_001092643.1 |
| DM05718P3 | 9.22E-04   | -2.4610257 | -3.0507178 | -2.1969101 |            |                |
| DM02917P4 | 9.24E-04   | -1.2299536 | -1.148865  | -1.1098471 | ISCW_ISCWC | XM_002411321.1 |
| DM00125P3 | 9.26E-04   | -1.2209626 | -1.5465821 | 1.0785177  | G6PD       | NM_000402.3    |
| DM03841P2 | 9.49E-04   | 1.0366681  | -1.1719327 | -1.3225303 |            |                |
| DM11567P2 | 9.58E-04   | -1.0609729 | -1.0523235 | -1.3389864 |            |                |
| DM08546P1 | 9.66E-04   | 1.1085184  | 1.1116408  | -1.2167097 |            |                |
| DM02550P3 | 9.71E-04   | 1.4577596  | 1.6080071  | 1.40537    |            |                |
| DM03834P3 | 9.81E-04   | 1.032329   | 1.0163931  | -1.423031  |            |                |
| DM01245P1 | 9.84E-04   | -1.12221   | -1.1685106 | 1.1052368  | LOC1001610 | XM_001944694.1 |
| DM14553P2 | 0.00101221 | -1.057751  | -2.5524898 | 1.1020389  |            |                |
| DM06953P2 | 0.00101549 | -1.3654493 | -1.2473435 | 1.4075238  |            |                |
| DM01854P2 | 0.00101782 | -1.170218  | -1.1225642 | -1.7717109 | TBB-4      | NM_077184.3    |
| DM12530P4 | 0.00102034 | -1.1133397 | -1.1195741 | -1.7101231 |            |                |
| DM14902P3 | 0.00102411 | -1.0829041 | 1.3211342  | 2.4941158  |            |                |
| DM08616P1 | 0.00103294 | -1.1176928 | -1.0099573 | -1.5219642 |            |                |
| DM09546P3 | 0.00103436 | -1.4043685 | -1.0801246 | -1.461655  |            |                |

|           |            |            |            |            |            |                |
|-----------|------------|------------|------------|------------|------------|----------------|
| DM05302P3 | 0.00103799 | -1.143896  | -2.2486494 | 1.9589028  |            |                |
| DM04295P1 | 0.0010403  | 6.5677004  | 7.647074   | 7.75871    |            |                |
| DM01248P1 | 0.00104628 | 1.1649834  | 1.2058915  | 1.4848591  | PHOSRESTIN | XM_001865064.1 |
| DM01161P3 | 0.00104837 | 1.1327187  | -1.0092598 | -1.2507819 | OSGEP      | NM_001016112.2 |
| DM03283P3 | 0.00105284 | -1.168577  | -1.0269154 | 1.197861   | TMEM189    | XM_396481.2    |
| DM06877P4 | 0.00106447 | 1.1021496  | 1.2639579  | -2.5732543 |            |                |
| DM13180P1 | 0.00106515 | -1.3456941 | 1.033797   | 1.4538922  |            |                |
| DM02023P2 | 0.00107863 | 1.0127395  | -1.132022  | -1.2061249 |            |                |
| DM05733P1 | 0.00107956 | -1.0016835 | 1.147672   | 1.2706611  | LOC574544  | XM_001177660.1 |
| DM02531P1 | 0.00108221 | 1.4158078  | 1.8061374  | 1.8067964  | DERE\GG183 | XM_001977151.1 |
| DM09247P2 | 0.00108849 | -1.18894   | 1.0860926  | -1.7905928 |            |                |
| DM04955P2 | 0.00110321 | 4.1121836  | 2.4855974  | 4.020005   |            |                |
| DM01072P2 | 0.00111118 | -1.087779  | -1.015011  | -1.4651121 | LOC1002070 | XM_002165471.1 |
| DM00278P3 | 0.00111191 | -1.0797017 | 1.0632945  | -1.1896442 | POLR2G     | NM_001017065.3 |
| DM09215P1 | 0.00111192 | -1.1395586 | -1.0479022 | -1.5137621 |            |                |
| DM01870P2 | 0.00112606 | -1.1406331 | -1.198288  | -1.4675035 | DWIL\GK159 | XM_002063835.1 |
| DM08013P3 | 0.00113257 | -3.2654064 | -2.9774702 | -2.0184941 | LOC1001362 | NM_001124521.1 |
| DM14771P2 | 0.00113741 | 1.8515315  | 2.131718   | 1.322774   |            |                |
| DM03610P3 | 0.00114293 | -1.0601934 | -1.2719741 | -1.5840505 | TPP2       | XM_001864524.1 |
| DM07260P3 | 0.00115634 | -1.2798423 | 1.0891652  | 1.4432288  |            |                |
| DM04548P2 | 0.00117099 | -1.0232842 | 1.1198981  | 1.4119301  | IRAK4      | NM_001145258.1 |
| DM08046P3 | 0.00117144 | -1.1387259 | -1.0338849 | -1.4998686 |            |                |
| DM09854P1 | 0.00118183 | 1.6290739  | 1.4398096  | -1.9991844 |            |                |
| DM00848P1 | 0.0011931  | -4.431916  | -3.843573  | -1.1883404 |            |                |
| DM00572P3 | 0.00119394 | 1.005236   | -1.1648331 | -1.765478  | DUS3L      | XM_425899.2    |
| DM00048P1 | 0.0011997  | -1.126895  | -1.1014158 | -1.4863265 | RPD3       | NM_001167853.1 |
| DM00941P1 | 0.00121201 | 1.0335795  | -1.0410422 | -1.1878761 | PSAT1      | NM_001102150.1 |
| DM07355P3 | 0.00122921 | 1.0893092  | 1.0670544  | -1.2716515 |            |                |
| DM11954P3 | 0.00123369 | 1.073839   | -1.1238475 | -1.4045682 |            |                |
| DM05281P1 | 0.00123974 | -1.1865332 | -1.057268  | -1.1727014 |            |                |
| DM01536P1 | 0.00125672 | -1.0786247 | -1.1271411 | -1.2081708 | MTMR12     | NM_001135516.1 |
| DM01606P1 | 0.00126223 | -1.0354834 | -1.0811028 | -1.1801429 | RPLP0      | XM_001851076.1 |
| DM03065P1 | 0.00127173 | -1.1102474 | -1.14165   | -1.2313565 | ACTR1A     | XM_001171550.1 |
| DM07400P1 | 0.00127812 | -2.2988827 | -2.6739671 | -1.7685081 |            |                |
| DM00373P3 | 0.00127843 | -1.1811758 | -1.2444451 | -1.2895691 | MANF       | XM_625020.2    |
| DM02055P3 | 0.00128937 | -1.0599058 | -1.0444927 | 1.4881774  | LOC1001683 | XM_001948336.1 |
| DM06922P2 | 0.00131003 | -1.2282441 | 1.1338793  | -2.4934065 |            |                |
| DM11300P2 | 0.00132057 | 1.0902544  | -1.0851668 | -1.1899898 |            |                |
| DM06758P2 | 0.00132899 | -1.1119723 | -1.1087651 | -1.6048254 |            |                |
| DM12162P1 | 0.00133107 | 1.128987   | 1.3182148  | 1.3074169  |            |                |
| DM02443P2 | 0.00134381 | -1.2625862 | -1.0970275 | 1.5138042  | ALDH1A1    | NM_001087771.1 |
| DM10996P1 | 0.0013463  | -1.149262  | -1.083798  | -1.4040966 |            |                |
| DM09218P3 | 0.00135604 | 1.1698731  | 1.4591445  | 1.8684782  |            |                |
| DM07050P2 | 0.00137485 | -3.0966828 | -3.147038  | -2.7859137 |            |                |
| DM01820P3 | 0.00137872 | 1.0936451  | 1.3523649  | 1.3758079  |            |                |
| DM11615P1 | 0.00138125 | -1.0767049 | -1.0427425 | -1.4068466 |            |                |
| DM06093P3 | 0.00138597 | -1.4036195 | 1.0093306  | 1.3615521  |            |                |
| DM08685P4 | 0.00139094 | 1.19823    | 1.4087447  | 1.531029   |            |                |
| DM01907P3 | 0.00139701 | -1.1882569 | -1.0935684 | -1.4773688 | DWIL\GK172 | XM_002075252.1 |
| DM02491P3 | 0.00141615 | -1.0557406 | 1.0650387  | 1.2467006  |            |                |

|           |            |            |            |            |                            |
|-----------|------------|------------|------------|------------|----------------------------|
| DM06166P2 | 0.0014275  | 1.2227008  | 1.2722316  | 1.5444314  |                            |
| DM03924P2 | 0.00143508 | -1.0632955 | -1.1209022 | -1.4448414 | DYAK\GE105(XM_002088897.1  |
| DM00298P1 | 0.00144718 | -1.2251201 | -1.1598529 | -1.4715476 | ISCW_ISCWC XM_002412481.1  |
| DM05224P3 | 0.00145529 | 1.7024848  | 2.7231812  | 2.9207547  |                            |
| DM00804P3 | 0.00145963 | -1.1363478 | 1.0835736  | -1.5567164 | BRAFLDRAFT_XM_002608298.1  |
| DM11399P1 | 0.00146043 | 1.7310412  | 1.6069156  | 1.1774768  |                            |
| DM10570P2 | 0.00146185 | -1.096308  | -1.0895709 | 4.626853   |                            |
| DM04903P1 | 0.00148486 | -2.046203  | -2.439588  | 2.6543772  |                            |
| DM12253P4 | 0.00149022 | 1.4340265  | 1.6684308  | 1.8602496  |                            |
| DM06445P1 | 0.00149343 | -1.326134  | -1.7566938 | -2.9998217 |                            |
| DM02752P4 | 0.00149843 | -1.3582431 | -1.143071  | -1.7381152 | LOC1000266!XM_001370341.1  |
| DM01348P3 | 0.00150511 | 1.0648361  | 1.0465028  | -1.4996033 | DVIR\GJ1812 XM_002057389.1 |
| DM00075P1 | 0.00151779 | -1.0470569 | -1.2016573 | -1.3666525 | RHOT2 NM_001080866.1       |
| DM01800P2 | 0.00153174 | -1.2588328 | -1.3116581 | -1.356581  | DERE\GG250 XM_001980943.1  |
| DM05872P2 | 0.00153805 | -1.080257  | -1.5928695 | -1.6296635 |                            |
| DM04058P1 | 0.00154057 | 4.990904   | 6.213359   | 5.918274   |                            |
| DM04272P3 | 0.00154311 | 1.0876683  | -1.0105267 | -1.3355929 |                            |
| DM00814P4 | 0.0015479  | 1.0123395  | -1.1734372 | -1.6338851 | DGRI\GH123!XM_001990918.1  |
| DM06320P3 | 0.00154922 | -1.0804276 | -1.3416773 | 2.2284632  |                            |
| DM04223P2 | 0.00155227 | 1.0011637  | -1.6934627 | 1.6783257  |                            |
| DM03959P2 | 0.00155999 | -1.0306475 | -1.0591098 | -1.432273  |                            |
| DM07669P1 | 0.00156312 | 1.2540134  | 1.3267602  | 1.5587491  |                            |
| DM00169P2 | 0.00157514 | 1.0141313  | -1.0393965 | -1.2279994 | LOC659356 XM_970683.2      |
| DM09451P1 | 0.00157795 | -1.0652289 | -1.0089855 | -1.6737187 |                            |
| DM00696P4 | 0.00158923 | 2.3471417  | 3.0084717  | 2.195747   | BMM NM_001169974.1         |
| DM14212P1 | 0.0016009  | -1.0207545 | -1.0100788 | 1.253577   |                            |
| DM06439P4 | 0.00160367 | 1.0514573  | -1.0183592 | -1.4224464 |                            |
| DM15340P2 | 0.00160468 | -1.1985441 | 1.128566   | -1.0225414 |                            |
| DM05817P2 | 0.00161496 | 1.0054234  | 1.1881126  | 1.45234    |                            |
| DM09360P2 | 0.00161897 | -1.0519415 | -1.0711194 | -1.3168238 |                            |
| DM00945P2 | 0.00162413 | 1.0893073  | -1.0688577 | -1.3291618 | LOC1001420!XM_001811987.1  |
| DM08180P2 | 0.00163111 | -1.3348451 | -1.1390979 | 1.291686   | DPSE\GA272!XM_002137471.1  |
| DM11180P3 | 0.00164497 | 1.086255   | -1.1490444 | 1.42656    |                            |
| DM04837P3 | 0.00165599 | 1.2195281  | 1.1764928  | 1.2087762  | LOC1001138(XM_001602665.1  |
| DM02229P1 | 0.00166264 | -1.2775738 | -1.191996  | -1.411195  | DYAK\GE141(XM_002092255.1  |
| DM11880P2 | 0.00167083 | 1.1603444  | 1.1735657  | 2.0524833  |                            |
| DM03930P3 | 0.00167525 | 1.1545225  | 1.3245859  | 1.6473776  |                            |
| DM01000P2 | 0.00169558 | -1.157143  | -1.1742988 | -1.4990541 | LOC1002226:XM_002187385.1  |
| DM03998P3 | 0.00170703 | 1.039211   | -1.783708  | 2.3720815  |                            |
| DM02561P3 | 0.00171069 | 1.0337032  | -1.1995889 | -1.4383124 | LOC414042 XM_397478.3      |
| DM04781P3 | 0.00172166 | 1.2179595  | 1.2068272  | 1.5835173  |                            |
| DM02245P1 | 0.00174227 | -1.4311273 | -1.3941438 | -1.5953078 | SAMD XM_001658136.1        |
| DM10268P2 | 0.00174346 | -1.3803585 | -2.1462646 | 2.16685    |                            |
| DM04301P3 | 0.00175517 | -1.0310267 | 1.2904092  | -2.2452335 |                            |
| DM10493P1 | 0.00175963 | -1.0837187 | -2.0390544 | -3.5106688 |                            |
| DM10701P1 | 0.00176272 | -1.2735215 | -1.0775176 | -1.5500575 |                            |
| DM09306P1 | 0.0017738  | 1.145085   | -1.0488946 | -1.3465117 |                            |
| DM01696P1 | 0.00177383 | -1.1624488 | -1.0023926 | 1.5547581  | CHIT XM_001841628.1        |
| DM11696P1 | 0.00177861 | -1.4349223 | -1.3952729 | 1.151645   |                            |
| DM09310P1 | 0.00178022 | 1.3311985  | -1.0260274 | -3.0986753 |                            |

|           |            |            |            |            |            |                |
|-----------|------------|------------|------------|------------|------------|----------------|
| DM05560P3 | 0.0017954  | 1.7085011  | 2.343446   | 1.6870626  |            |                |
| DM10763P1 | 0.00179777 | 1.169439   | 1.5377443  | 1.7185748  |            |                |
| DM11462P1 | 0.00180922 | -2.2458801 | -2.4067657 | -2.4749725 |            |                |
| DM15042P1 | 0.00183213 | 1.1936307  | 1.4322956  | -1.180998  |            |                |
| DM10803P2 | 0.00184912 | 1.2325658  | 1.2265414  | -1.8578905 |            |                |
| DM02717P2 | 0.00185144 | 1.1794418  | 1.2547939  | 1.6840055  |            |                |
| DM01446P1 | 0.00186162 | 1.7636813  | 2.036138   | 3.096769   |            |                |
| DM09604P1 | 0.00187333 | -1.0762149 | -1.1477834 | -1.4305987 |            |                |
| DM10908P1 | 0.00187475 | 1.0081611  | -1.0481371 | -1.3608106 |            |                |
| DM12090P1 | 0.00187774 | -1.1906801 | -1.011197  | 1.161354   |            |                |
| DM00569P1 | 0.00188428 | 2.0230756  | 1.7887726  | -1.1858697 | AGAP_AGAP0 | XM_001689121.1 |
| DM09625P1 | 0.00188975 | 1.3665794  | 1.1156142  | 1.6580987  |            |                |
| DM03373P4 | 0.00189371 | 2.6330974  | 2.6780937  | 1.8109722  |            |                |
| DM08436P1 | 0.00189997 | -1.0900979 | -1.1224753 | -1.5757313 | C27H5.3    | NM_063082.3    |
| DM06399P3 | 0.00190151 | 1.3341867  | 1.1222938  | -3.4833243 |            |                |
| DM03484P1 | 0.00192323 | -1.1079948 | -1.0695484 | -1.5301499 |            |                |
| DM10575P2 | 0.00193036 | 1.0415354  | 1.0950575  | 1.5383364  |            |                |
| DM05840P4 | 0.00193581 | 2.4750903  | 3.1365502  | 2.2282536  |            |                |
| DM12114P2 | 0.00196255 | 1.3508332  | 1.5626885  | 1.3171325  |            |                |
| DM01099P3 | 0.00196781 | -1.122953  | -1.0315439 | -1.6489714 | LOC1002054 | XM_002163856.1 |
| DM00316P4 | 0.00199841 | -1.0157263 | -1.1847534 | -1.3392475 | DSEC\GM211 | XM_002033162.1 |
| DM05335P2 | 0.00200021 | -1.1293609 | -1.9210861 | 1.7151065  |            |                |
| DM08533P1 | 0.00201512 | 1.0796673  | 1.1908064  | -1.463394  |            |                |
| DM14797P1 | 0.00201808 | -1.1134686 | -1.0298893 | -1.7121397 |            |                |
| DM10366P1 | 0.00202471 | -1.1005172 | -1.4038117 | -1.5640006 | LOC1000197 | XM_001366295.1 |
| DM01271P1 | 0.00202953 | 6.113601   | 7.490757   | 3.5493555  | ISCW_ISCWC | XM_002413666.1 |
| DM11406P3 | 0.00203295 | -1.0343875 | 1.0239056  | 1.2323252  |            |                |
| DM14448P3 | 0.00204366 | -1.1986036 | -1.1506969 | -1.5423412 |            |                |
| DM01608P2 | 0.00204518 | 1.0845155  | 1.0158007  | -1.2908365 | GLYG       | NM_001139830.1 |
| DM05203P1 | 0.00204873 | -1.0614733 | -1.0013269 | -1.3262385 | LOC1001240 | XM_001607822.1 |
| DM12734P1 | 0.0020554  | 1.071464   | -1.0686281 | -1.5052968 |            |                |
| DM06529P1 | 0.0020717  | 1.1708702  | 1.2999932  | -1.4142737 |            |                |
| DM00852P2 | 0.00207249 | -1.083537  | -1.0053908 | -1.4017327 | LOC551987  | XM_624370.2    |
| DM03977P2 | 0.00207465 | -1.3982252 | -1.0881958 | -1.7011019 | TTC30B     | NM_001127607.1 |
| DM08196P4 | 0.0020807  | -1.696929  | -1.5998951 | -1.0537168 |            |                |
| DM06183P1 | 0.00214897 | -1.0866528 | -1.176961  | -1.3476866 | LOC578921  | XM_001184577.1 |
| DM00334P3 | 0.00215373 | -1.0109916 | 1.0147725  | -1.297851  | DWIL\GK171 | XM_002061740.1 |
| DM08518P1 | 0.00216932 | 1.0514939  | -1.0218891 | -1.496452  |            |                |
| DM05966P2 | 0.00217459 | -1.2148533 | -1.2613696 | -1.5095931 |            |                |
| DM05862P1 | 0.00217575 | -1.0356402 | -1.4200429 | -1.0308042 |            |                |
| DM05653P1 | 0.00217758 | -1.0039787 | -1.0915298 | -1.2231815 |            |                |
| DM12598P3 | 0.00218112 | 1.1174667  | 1.3353868  | 1.808197   |            |                |
| DM01986P1 | 0.0021878  | -1.1971171 | -1.2973472 | -1.5085453 | NEMVEDRAFT | XM_001626918.1 |
| DM03985P1 | 0.00220436 | 1.1985651  | 1.1310817  | 2.6730566  |            |                |
| DM11979P1 | 0.00221286 | 1.0270275  | 1.152171   | 1.2122868  |            |                |
| DM08171P1 | 0.00221765 | 1.1937972  | 1.3403937  | 1.6462518  |            |                |
| DM06113P3 | 0.00223255 | -1.1082468 | -1.0279382 | 1.2114217  | DGRI\GH180 | XM_001990790.1 |
| DM07495P1 | 0.00226008 | -1.1328833 | -1.7118709 | -2.075642  |            |                |
| DM01448P4 | 0.00226137 | -1.1215595 | -1.325749  | -1.3294228 | LOC1001617 | XM_001950712.1 |
| DM12823P1 | 0.00227699 | 1.1026525  | 1.2034918  | -1.288202  |            |                |



|           |            |            |            |            |            |                |
|-----------|------------|------------|------------|------------|------------|----------------|
| DM09845P3 | 0.00227906 | 1.3497237  | 1.4594702  | 1.1461989  |            |                |
| DM10780P1 | 0.00232337 | 1.0370225  | -1.0770116 | 1.4835852  |            |                |
| DM13427P4 | 0.00232415 | 1.2362999  | -1.0663399 | -1.2518148 |            |                |
| DM07811P3 | 0.00235595 | -1.3015168 | -1.173276  | -1.0750271 |            |                |
| DM08066P2 | 0.00236541 | -1.0176288 | 1.0084308  | 1.3892819  |            |                |
| DM12355P1 | 0.00236838 | 1.5058897  | 1.689724   | 3.2387326  |            |                |
| DM08053P2 | 0.00237479 | 2.4705627  | 3.8694947  | 2.2578447  |            |                |
| DM05415P1 | 0.00237779 | 1.2102324  | 1.4788231  | 1.5664456  |            |                |
| DM01367P3 | 0.00238589 | -1.0621122 | 1.0561937  | 1.2643584  | DMOJ\GI191 | XM_002005214.1 |
| DM14869P1 | 0.00238645 | 1.160704   | 1.4789014  | 1.4240999  |            |                |
| DM11793P3 | 0.00239697 | 1.1628132  | 1.0522339  | -1.152001  | GM4880     | NM_023858.3    |
| DM05131P4 | 0.00239719 | 1.2791964  | 1.3370231  | 1.307776   |            |                |
| DM09311P2 | 0.00243929 | -1.1442    | -1.071243  | 1.4496726  |            |                |
| DM09690P3 | 0.00244846 | -1.0903805 | -1.0952046 | -1.3794233 |            |                |
| DM00021P1 | 0.0024588  | -1.1871808 | -1.2860682 | -1.2776576 | NEMVEDRAFT | XM_001627260.1 |
| DM07474P4 | 0.00246379 | 1.4313624  | 1.9834788  | 1.573901   |            |                |
| DM04988P2 | 0.00248792 | 1.0115123  | 1.1338732  | -1.2539041 |            |                |
| DM05567P1 | 0.00250013 | 1.871058   | 2.3999627  | 2.1896822  |            |                |
| DM11602P2 | 0.00251762 | -1.136742  | -1.2167838 | -1.3640457 | LOC656519  | XM_963045.2    |
| DM03778P2 | 0.00253768 | -1.0692645 | -1.1796067 | -1.3534142 |            |                |
| DM14646P1 | 0.00254412 | -1.3683201 | -1.2451711 | 1.0444862  |            |                |
| DM14867P1 | 0.00254455 | 1.04013    | 1.2251599  | -1.6382643 |            |                |
| DM01050P2 | 0.00255327 | -1.0860103 | -1.0165493 | -1.28959   |            |                |
| DM00965P3 | 0.00255931 | -1.186096  | -1.3964604 | -1.624356  | LOC1001153 | XM_001599682.1 |
| DM12917P1 | 0.00256433 | -1.550503  | -1.6163505 | -1.6428133 |            |                |
| DM01009P3 | 0.00257266 | -1.09806   | 1.0144491  | -1.3156587 | METTL2     | NM_172567.3    |
| DM12796P3 | 0.00258384 | -1.1866465 | 1.0635887  | 1.5685532  |            |                |
| DM03725P2 | 0.00261016 | 1.2373703  | 1.0828476  | -1.0881673 |            |                |
| DM01864P2 | 0.00261983 | -1.1265109 | -1.3344223 | -1.4270123 | TRIADDRAFT | XM_002114628.1 |
| DM03145P3 | 0.00263576 | -4.2508583 | -4.4522595 | -1.2210323 | LOC1002744 | NM_001148825.1 |
| DM02159P1 | 0.00264249 | -1.0816579 | -1.1558225 | -1.4140371 | AGAP_AGAP0 | XM_307929.4    |
| DM02704P1 | 0.00264773 | 1.1115713  | 1.1048937  | 1.6166126  |            |                |
| DM11239P2 | 0.00265511 | -1.032185  | 1.0565864  | -1.4015462 |            |                |
| DM02334P1 | 0.00265732 | -1.0647063 | -1.2335308 | -1.3556315 | PROS45     | NM_134603.1    |
| DM04653P1 | 0.00266403 | 1.9035199  | 2.4473617  | 1.5042416  |            |                |
| DM07245P2 | 0.00267795 | 1.1291344  | 1.6290376  | 2.8492188  |            |                |
| DM00268P2 | 0.00267925 | -1.1312652 | -1.2059805 | -1.3884822 | LOC1001646 | XM_001946418.1 |
| DM06105P1 | 0.00268822 | 1.0059094  | -1.074432  | -1.4952664 | DWIL\GK208 | XM_002061292.1 |
| DM10631P4 | 0.00272755 | 1.0481155  | 1.1782737  | -1.3043422 |            |                |
| DM05735P3 | 0.00273035 | 1.2643832  | 1.1373732  | -1.2642254 |            |                |
| DM11400P2 | 0.00273999 | 1.3520168  | 1.484868   | -1.0492947 |            |                |
| DM03475P3 | 0.00275688 | -1.137142  | -1.0720823 | -1.7048621 |            |                |
| DM03634P3 | 0.00276143 | -1.2618186 | -1.1974818 | -1.54192   | BRAFLDRAFT | XM_002613798.1 |
| DM06134P1 | 0.00276161 | -1.1150906 | -1.0661155 | -1.3118699 |            |                |
| DM05197P3 | 0.00276785 | 1.0453413  | 1.057936   | 1.3002946  |            |                |
| DM04916P2 | 0.00280988 | -1.0986576 | -1.0688211 | -1.4611118 |            |                |
| DM06044P1 | 0.00281144 | -1.5853485 | -1.6527685 | -1.1056036 |            |                |
| DM01893P1 | 0.00281622 | -1.137679  | -1.0222858 | -1.7993982 | FG00571.1  | XM_380747.1    |
| DM07487P2 | 0.00281891 | -1.0744293 | 1.1003208  | -1.2151709 |            |                |
| DM13097P3 | 0.00282422 | -1.6045464 | -2.0020337 | 1.6634687  |            |                |

|           |            |            |            |            |                           |                |
|-----------|------------|------------|------------|------------|---------------------------|----------------|
| DM09793P1 | 0.00283    | -1.0006473 | -1.0895236 | -1.2314116 |                           |                |
| DM00337P1 | 0.0028484  | -1.1217914 | -1.1642816 | -1.315233  | BRAFLDRAFT_XM_002608112.1 |                |
| DM11342P2 | 0.00287563 | -1.1369799 | -1.0680573 | -1.5309688 | C27H5.3                   | NM_063082.3    |
| DM08432P2 | 0.00287828 | 1.098788   | 1.1830722  | 1.7491331  |                           |                |
| DM14982P1 | 0.00289559 | 1.0138892  | 1.751483   | 1.0514225  |                           |                |
| DM01233P4 | 0.00291568 | 1.569858   | 1.5200124  | 1.2900499  | CPIPJ_CPIJOC              | XM_001849333.1 |
| DM03062P1 | 0.00291917 | 1.0030584  | -1.2214279 | -1.5119214 | LOC1001655                | XM_001950795.1 |
| DM12846P1 | 0.00293758 | 1.2565173  | 1.4840382  | 1.1915623  |                           |                |
| DM08784P1 | 0.00296072 | -1.1415377 | 1.1449808  | 1.2554747  |                           |                |
| DM02472P4 | 0.00296138 | 1.3353833  | 1.591909   | 1.3220612  |                           |                |
| DM12249P2 | 0.00296414 | -1.3490646 | -1.374772  | -1.7120101 |                           |                |
| DM10914P3 | 0.00296472 | -1.0960708 | 1.2569773  | 2.0375364  |                           |                |
| DM06712P2 | 0.00296733 | 1.2286323  | 1.5416101  | 1.4529638  |                           |                |
| DM13006P2 | 0.00299809 | -1.1721698 | -1.0592667 | 1.5827451  |                           |                |
| DM13256P3 | 0.00300509 | -1.1039087 | -1.1344212 | -1.4217842 |                           |                |
| DM00427P1 | 0.00300612 | 1.1761653  | -1.1923968 | -1.4114215 | BMP                       | XM_001663364.1 |
| DM03385P2 | 0.00300896 | -1.006585  | -1.146721  | -1.382492  | LOC656679                 | XM_963188.2    |
| DM00498P1 | 0.00301794 | -1.1088759 | -1.363309  | -1.4657024 | LOC692991                 | NM_001046828.1 |
| DM06038P3 | 0.00302788 | 1.0496923  | -1.1298525 | 1.391544   | LOC552800                 | XM_625175.2    |
| DM08507P1 | 0.00302906 | -1.0101385 | 1.2676477  | 1.1951771  |                           |                |
| DM01221P3 | 0.00305098 | 1.0706708  | 1.2587287  | -1.2213278 | DPH2                      | XM_001650846.1 |
| DM05700P3 | 0.0030569  | -1.028045  | -1.111819  | 1.1362066  | NEMVEDRAFT                | XM_001638161.1 |
| DM11327P1 | 0.00305904 | 1.0909588  | -1.2330812 | 1.3973794  |                           |                |
| DM06749P1 | 0.00306411 | 1.0352172  | -1.0216573 | 1.484157   |                           |                |
| DM07761P1 | 0.00306861 | -1.2549161 | 1.2300186  | -1.085015  |                           |                |
| DM01319P2 | 0.00308002 | -1.2451473 | -1.0956249 | -1.517211  | LOC659830                 | XM_966102.2    |
| DM11196P3 | 0.00308187 | 1.0577816  | -1.1394095 | -1.2237158 |                           |                |
| DM07230P2 | 0.00308637 | 2.1573613  | 2.433098   | 3.3758957  |                           |                |
| DM09121P1 | 0.00309363 | 2.052018   | 2.115552   | 2.372035   |                           |                |
| DM11720P3 | 0.00310397 | -1.0623312 | -1.1956853 | -1.3953677 | IF2                       | XM_001659813.1 |
| DM01029P2 | 0.00314926 | -1.057433  | -1.0479528 | -1.309498  | METAP1D                   | NM_001162303.1 |
| DM14648P1 | 0.00315122 | 1.0974488  | 1.1131676  | 1.3051229  |                           |                |
| DM00883P1 | 0.00317117 | 1.2753911  | 1.5455259  | 1.760418   | LOC1000636                | XM_001494831.2 |
| DM04025P4 | 0.0031778  | 1.0643327  | 1.017774   | -1.6565763 |                           |                |
| DM00587P3 | 0.00318385 | 1.6840292  | 1.8136021  | 1.7457117  | LOC412744                 | XM_396197.3    |
| DM12317P1 | 0.00318755 | 1.1871547  | -1.1426716 | -1.3774452 | ATL2                      | XM_001168098.1 |
| DM04118P1 | 0.00319344 | 1.0187913  | 1.0585065  | -1.1896204 | LOC1002281                | XM_002187955.1 |
| DM09593P2 | 0.00319568 | -1.0069654 | 1.0444196  | 1.2891809  |                           |                |
| DM08429P1 | 0.00319818 | 1.247945   | 1.2640961  | 1.5840813  |                           |                |
| DM06775P2 | 0.00320321 | 1.3241272  | 1.5205643  | -1.3481245 |                           |                |
| DM06135P2 | 0.00321671 | -1.1418897 | -2.0290308 | -3.1811564 |                           |                |
| DM06696P1 | 0.00321739 | -1.066595  | -1.1495174 | -1.2941742 |                           |                |
| DM11589P3 | 0.0032182  | -1.0881627 | -1.015305  | -1.3355603 |                           |                |
| DM11672P2 | 0.00321961 | -1.0986584 | -1.0729697 | -1.2577324 |                           |                |
| DM12891P1 | 0.00322129 | -1.0629004 | 1.00677    | 1.2567674  |                           |                |
| DM05623P1 | 0.00323178 | 1.2320421  | 1.0067431  | 1.1706672  |                           |                |
| DM10196P1 | 0.00325843 | 2.8020296  | 5.0771165  | 1.6787643  |                           |                |
| DM12367P4 | 0.00326101 | 1.0589678  | 1.1517558  | 1.364758   |                           |                |
| DM05809P1 | 0.00327057 | -1.5623306 | -1.5409759 | 1.0298231  |                           |                |
| DM01570P1 | 0.0032713  | -1.019538  | -1.2495224 | -1.171529  | RHO1                      | XM_623222.2    |

|           |            |            |            |            |              |                |
|-----------|------------|------------|------------|------------|--------------|----------------|
| DM12352P1 | 0.00327647 | -1.0657052 | 1.0530126  | -1.3587252 |              |                |
| DM04411P1 | 0.00330011 | -1.0550929 | 1.1563805  | -1.2889805 | DANA\GF119   | XM_001959602.1 |
| DM12118P2 | 0.00330353 | 1.5744175  | 1.7616863  | 1.7596314  | DERE\GG172   | XM_001980589.1 |
| DM02620P4 | 0.00330416 | -1.1655234 | 1.0391356  | 1.754331   |              |                |
| DM05835P1 | 0.00332956 | -1.0430357 | 1.3640832  | -1.4499848 |              |                |
| DM06542P1 | 0.00333711 | 1.2087386  | 1.1643925  | 1.4716066  |              |                |
| DM12412P2 | 0.00338246 | 1.5398825  | 1.8739442  | -1.2469201 |              |                |
| DM02070P2 | 0.00338632 | -1.1695744 | -1.2415787 | -1.4497867 | DANA\GF165   | XM_001954760.1 |
| DM00398P2 | 0.00339621 | 1.0494965  | 1.0219165  | -1.3740343 | LOC1000841   | XM_001514656.1 |
| DM04486P2 | 0.00340451 | 1.1480337  | 1.2206042  | 1.2262242  |              |                |
| DM01744P1 | 0.0034163  | 1.3497137  | 1.2779526  | 1.2781893  | LOC552832    | XM_625207.1    |
| DM00022P3 | 0.0034188  | -1.1189597 | -1.0536706 | -1.5360148 | TBB-4        | NM_077184.3    |
| DM05091P2 | 0.00343404 | 1.2655835  | -1.0049733 | -3.0488906 |              |                |
| DM09472P3 | 0.00344099 | 1.0561867  | -1.1197853 | -1.3593627 |              |                |
| DM07978P2 | 0.0034557  | 1.0024314  | 1.5780963  | 1.5330492  |              |                |
| DM08981P2 | 0.0034587  | -1.1966016 | -1.0661588 | -1.9402546 |              |                |
| DM09347P1 | 0.00347077 | -1.1775714 | 1.0274007  | 1.7450479  |              |                |
| DM11978P3 | 0.00347096 | 1.1890018  | 1.0786848  | -1.3108112 |              |                |
| DM04873P1 | 0.00347215 | 1.0821265  | 1.0479103  | -1.3636687 |              |                |
| DM15066P2 | 0.00347799 | -1.0305665 | -1.0101484 | -1.2518823 |              |                |
| DM04787P3 | 0.00349615 | 1.0541118  | 1.1880159  | -1.2481054 |              |                |
| DM04063P1 | 0.00350418 | 1.114002   | 1.2297976  | 1.4526241  | LOC1001688   | XM_001946504.1 |
| DM04669P3 | 0.00350646 | -2.6101708 | -2.825964  | -4.7050714 |              |                |
| DM04198P3 | 0.00350708 | 1.5583758  | 1.3261226  | 1.7374239  |              |                |
| DM09952P3 | 0.00351265 | -1.1050396 | -1.0820489 | -1.3487312 |              |                |
| DM00220P1 | 0.00354649 | 1.0601258  | -1.0127153 | -1.1352121 | CBL          | XM_605809.4    |
| DM05175P2 | 0.00355409 | 1.0622578  | -1.1736543 | -1.4883262 |              |                |
| DM00324P3 | 0.00355781 | -1.0539172 | -1.061645  | -1.405183  | CPIPJ_CPIJ01 | XM_001863386.1 |
| DM05304P1 | 0.00357127 | 1.1462659  | 1.0153297  | -1.1782482 |              |                |
| DM11086P3 | 0.00357467 | 1.054731   | 1.1116716  | -1.1172595 |              |                |
| DM00184P2 | 0.00357956 | 1.0946001  | -1.0421321 | -1.3862787 | AP2A2        | NM_001142851.1 |
| DM04519P3 | 0.00358175 | -1.2736728 | -1.1135437 | -1.6088501 | LOC412349    | XM_395810.3    |
| DM01502P2 | 0.00359019 | 1.2760758  | 1.0534803  | -1.112353  | LOC1002062   | XM_002156722.1 |
| DM06442P2 | 0.00359328 | -1.2693663 | -1.274079  | -1.5059842 |              |                |
| DM13630P3 | 0.00365673 | 3.426231   | 4.6214085  | 2.539486   | DVIR\GJ1266  | XM_002046130.1 |
| DM13532P1 | 0.003679   | -1.2992213 | 1.0182941  | 1.2193393  |              |                |
| DM07337P1 | 0.00367942 | 1.4748086  | 1.8577745  | 1.6614673  |              |                |
| DM03370P3 | 0.00368089 | 1.3781466  | 1.5213541  | -1.1484938 | CG2767       | NM_001144553.1 |
| DM09175P1 | 0.00370591 | -1.0434233 | -1.0613855 | -1.4364803 |              |                |
| DM08957P3 | 0.00371119 | 1.0382584  | 1.2941189  | 1.4608456  |              |                |
| DM11108P3 | 0.00373324 | -1.0225687 | 1.1624554  | 1.2460442  | SYF2         | NM_001085936.1 |
| DM12547P3 | 0.00374023 | 1.1124305  | 1.2491146  | -1.3962917 |              |                |
| DM06551P2 | 0.0037485  | -1.5542439 | -1.398083  | 2.0081174  |              |                |
| DM05882P3 | 0.00375121 | 1.1692001  | 1.1452837  | -2.8402696 | DYAK\GE254   | XM_002096070.1 |
| DM00560P4 | 0.00378113 | 1.0097415  | -1.1811048 | -1.2626946 | DVIR\GJ1977  | XM_002058859.1 |
| DM00451P3 | 0.00378791 | 1.104758   | -2.2313607 | -1.4170806 | BRAFLDRAFT   | XM_002612935.1 |
| DM05295P3 | 0.00379763 | 1.0135071  | -1.0149254 | -1.3963618 |              |                |
| DM03574P2 | 0.00379972 | 1.0484076  | -1.027534  | -1.4055393 | LOC661534    | XM_967685.2    |
| DM14151P2 | 0.00380345 | -1.2215359 | -1.250591  | -1.6165738 | DVIR\GJ1727  | XM_002051900.1 |
| DM04677P2 | 0.00381579 | -1.1603775 | 1.1145667  | -1.7331021 |              |                |

|           |            |            |            |            |                            |
|-----------|------------|------------|------------|------------|----------------------------|
| DM11958P4 | 0.00385377 | 1.1376998  | -1.1736543 | -1.2714496 |                            |
| DM08270P1 | 0.00385422 | 1.3862153  | 1.7850345  | 2.2270842  |                            |
| DM11824P1 | 0.00386641 | -1.2481524 | -1.491213  | -1.5733345 | LOC1001682 XM_001946431.1  |
| DM03121P3 | 0.00388067 | -1.2153546 | -1.1442236 | -1.4867568 | DWIL\GK215 XM_002063059.1  |
| DM02052P2 | 0.00388559 | -1.0198772 | -1.4037572 | 1.5562549  | BRAFLDRAFT XM_002604201.1  |
| DM07284P1 | 0.00388699 | -1.2379017 | 1.1733913  | -2.6743326 |                            |
| DM07957P3 | 0.00388734 | -1.1707237 | 1.1731522  | 1.5385466  |                            |
| DM10725P2 | 0.00390757 | 1.0253578  | -1.00593   | 1.3799797  |                            |
| DM08578P1 | 0.00390991 | 1.8108307  | 1.8162444  | 1.733755   |                            |
| DM10111P1 | 0.00394573 | -1.1435603 | 1.5092199  | 1.2288759  |                            |
| DM06956P2 | 0.003949   | 1.0908036  | 1.363727   | 1.7199341  |                            |
| DM03663P3 | 0.00395124 | 1.647546   | 1.5433544  | 1.2869059  | DANA\GF187 XM_001955346.1  |
| DM02146P1 | 0.00395884 | 1.1749703  | 1.2044344  | 1.1655457  | DSEC\GM185 XM_002037896.1  |
| DM09336P3 | 0.0039654  | 1.0980387  | 1.1071757  | -1.2313604 |                            |
| DM09190P2 | 0.00397614 | 1.0532706  | 1.4230545  | 1.8255726  |                            |
| DM01077P3 | 0.00398045 | 1.01028    | -1.0310991 | -1.2906876 |                            |
| DM08832P1 | 0.00398548 | -1.0939134 | -1.2187155 | -1.1327511 |                            |
| DM12566P1 | 0.00400168 | 1.1769515  | 1.0363946  | 1.6203573  |                            |
| DM03472P2 | 0.00401796 | 1.0178406  | -1.0101941 | -1.3041253 |                            |
| DM11583P2 | 0.00401884 | 1.136464   | -1.167709  | -1.119361  |                            |
| DM12707P2 | 0.00401904 | -1.0147558 | -1.2001463 | -1.4628003 |                            |
| DM06450P1 | 0.00403825 | 1.0491635  | -1.1017586 | 1.569124   |                            |
| DM05631P2 | 0.00405685 | 1.2765701  | 1.0935186  | -2.4438553 |                            |
| DM10498P3 | 0.00406568 | -1.3541342 | -1.1312879 | -2.300277  |                            |
| DM02939P3 | 0.00406691 | 1.0477936  | 1.1142564  | -1.2081243 |                            |
| DM02923P1 | 0.00407357 | 1.0005627  | -1.1771785 | -1.3404435 | LOC586206 XM_785997.2      |
| DM08974P1 | 0.00408176 | -1.2241598 | -1.1412157 | -1.3775543 |                            |
| DM12810P1 | 0.0040836  | -2.7810102 | -3.701189  | -6.689043  |                            |
| DM03997P3 | 0.00410557 | -1.0824695 | 1.4409465  | -1.0008276 | LOC1001636 XM_001944428.1  |
| DM00919P1 | 0.00410606 | -1.0522985 | -1.0739319 | -1.3008643 |                            |
| DM00010P4 | 0.00412234 | 1.2503986  | 1.6602291  | 1.664003   | LOC1000140 XM_001368331.1  |
| DM03524P1 | 0.00412377 | -1.1627816 | -1.1236247 | -1.5429534 |                            |
| DM01179P4 | 0.00413448 | 1.0324981  | 1.0556757  | 1.3254205  |                            |
| DM09416P3 | 0.00413548 | 1.0264552  | -1.0854062 | -1.3535968 |                            |
| DM00593P3 | 0.00413584 | -1.0357363 | -1.0846672 | -1.6348747 | MCM5-B NM_001086540.1      |
| DM06422P2 | 0.00413734 | 1.3338704  | 1.3967022  | 1.3636675  |                            |
| DM06808P1 | 0.00414012 | 1.4902976  | 1.8185169  | 1.7364994  |                            |
| DM00170P1 | 0.00416562 | -1.0966226 | -1.1304221 | -1.4036942 | PSMC4 XM_001652594.1       |
| DM05112P2 | 0.00416812 | -1.4720935 | -1.3604071 | -1.0605423 |                            |
| DM07892P2 | 0.00418437 | 1.1666855  | 1.0695266  | -1.3504833 |                            |
| DM05007P1 | 0.00418794 | 1.3289918  | 1.3716413  | 1.1438462  | CLN3 XM_523328.2           |
| DM14263P1 | 0.00418841 | -1.5379131 | -1.2352222 | 1.1997701  |                            |
| DM06162P1 | 0.004198   | -1.1742648 | -1.069342  | -1.4323266 | HRP28 NM_001111354.1       |
| DM01794P1 | 0.00419991 | -1.0813026 | -1.0957184 | -1.326171  | DWIL\GK163 XM_002067312.1  |
| DM03328P2 | 0.00420513 | 1.6304425  | 1.6753346  | -1.0978037 | DVIR\GJ1266 XM_002046130.1 |
| DM09735P2 | 0.00422448 | -1.0359172 | -1.153779  | -1.7676157 |                            |
| DM00490P1 | 0.00426464 | -1.0614841 | -1.0696043 | -1.4331319 | CCT5B NM_001097075.1       |
| DM01442P3 | 0.00430888 | 1.0807017  | -1.1450524 | -1.1833924 | P38MAPK NM_001142865.1     |
| DM10425P3 | 0.0043092  | 1.0346427  | 1.1658534  | -1.1501168 |                            |
| DM00680P3 | 0.00432886 | -1.050971  | -1.113296  | -1.2624846 | DYAK\GE206 XM_002090065.1  |

|           |            |            |            |            |            |                |
|-----------|------------|------------|------------|------------|------------|----------------|
| DM02513P3 | 0.00433082 | -1.0990359 | -1.1655576 | -1.3385007 | DCP1B      | NM_001134200.1 |
| DM04399P2 | 0.0043337  | 1.1096774  | 1.3190504  | 1.6048771  | LOC1000606 | XM_001492869.2 |
| DM01964P1 | 0.00434063 | -1.1827178 | -1.1755291 | -1.2479522 | DERE\GG227 | XM_001979637.1 |
| DM00729P3 | 0.00434352 | -1.1543084 | -1.1945711 | -1.4282185 | AT1G62020  | NM_104882.4    |
| DM01347P1 | 0.00434693 | 1.3067633  | 1.5322255  | 1.5135092  | LOC594823  | XM_794247.2    |
| DM06011P2 | 0.00435118 | 1.038281   | -1.0443312 | -1.2812625 |            |                |
| DM04741P4 | 0.00436081 | -1.0832834 | 1.056506   | -1.5062551 |            |                |
| DM13493P2 | 0.00437005 | -1.0417142 | 1.0467306  | 1.3132894  |            |                |
| DM05257P1 | 0.00437899 | -1.2064191 | -1.31909   | -1.1997503 | NEMVEDRAFT | XM_001633252.1 |
| DM01688P1 | 0.00439007 | -1.0778959 | -1.0914745 | -1.3945853 | DMOJ\GI187 | XM_002006046.1 |
| DM11706P3 | 0.00439345 | 1.5940341  | 1.4623533  | -1.3167794 |            |                |
| DM14310P1 | 0.00439735 | 1.381809   | 1.7786804  | 1.5772074  |            |                |
| DM03986P1 | 0.00439987 | 1.4285781  | 1.9460263  | -1.9236001 |            |                |
| DM04957P2 | 0.00440269 | -1.1286206 | -1.0586545 | 1.4200221  | TRIADDRAFT | XM_002108033.1 |
| DM10524P2 | 0.00440655 | -1.8555003 | -2.0187533 | 1.0806916  |            |                |
| DM04816P3 | 0.00441076 | -1.1317278 | -1.4829088 | 1.2423334  |            |                |
| DM05337P3 | 0.00441449 | 1.127769   | -1.1596159 | -1.2330937 |            |                |
| DM01904P2 | 0.00441921 | -1.2142221 | -1.086912  | -1.38439   | LOC692970  | NM_001046809.1 |
| DM01761P3 | 0.00442407 | -1.6782938 | -1.5266441 | 1.1563632  |            |                |
| DM01995P1 | 0.00443073 | -1.2098778 | -1.1784772 | -1.3557363 | LOC1001678 | XM_001945366.1 |
| DM08688P4 | 0.00444455 | 1.0305732  | 1.0121537  | -1.2819328 |            |                |
| DM02371P2 | 0.0044451  | -1.5321546 | -1.4412307 | 1.2803526  | LOC448984  | NR_002170.3    |
| DM01206P1 | 0.0044503  | -1.0203061 | -1.168183  | -1.2332741 | PDCL3      | XM_858229.1    |
| DM04297P3 | 0.00445221 | -1.0989331 | 1.9650002  | 1.4033346  |            |                |
| DM05537P1 | 0.00445727 | 1.0818268  | -1.036667  | -1.1777844 |            |                |
| DM05711P3 | 0.00448805 | 1.2317107  | 1.5443571  | 1.4383067  |            |                |
| DM00102P1 | 0.00450167 | 1.0378147  | -1.1661422 | -1.3480737 | CDC5L      | XM_624903.2    |
| DM03060P3 | 0.00450383 | 1.0088854  | -1.0581127 | -1.3258076 | LOC1000127 | XM_001363686.1 |
| DM05762P1 | 0.00450722 | -1.1129844 | -1.1045626 | -1.4261941 |            |                |
| DM02866P4 | 0.00451279 | 1.2764882  | 1.2366842  | 1.1597326  | NEMVEDRAFT | XM_001624461.1 |
| DM01365P3 | 0.00453524 | -1.1423949 | -1.255434  | -1.6078746 | EIF3L      | NM_145139.2    |
| DM00776P2 | 0.00454214 | -1.1545397 | -1.2313966 | -1.2780925 |            |                |
| DM04393P1 | 0.00456002 | -1.1258143 | -1.044682  | 1.1170468  |            |                |
| DM09189P3 | 0.00457874 | -1.0070729 | -1.1814917 | 1.3780968  |            |                |
| DM12053P2 | 0.00460477 | -1.2002116 | -1.1088983 | -1.3781251 |            |                |
| DM05340P3 | 0.00461064 | -1.1927804 | -1.1241263 | -1.5205618 |            |                |
| DM08359P1 | 0.0046697  | 1.4028753  | 1.4663509  | 2.009681   |            |                |
| DM03112P2 | 0.00468179 | 1.0766934  | -1.2690679 | -1.2158928 |            |                |
| DM00928P1 | 0.00468362 | -1.2511444 | -1.0872794 | -1.5014426 | SNRPD3     | NM_001017093.2 |
| DM06590P3 | 0.00468872 | 1.0643767  | 1.1697319  | -1.2163616 |            |                |
| DM00302P1 | 0.0047207  | -1.0007833 | -1.255142  | -1.2397517 | LOC662115  | XM_968232.1    |
| DM04879P4 | 0.00472987 | -1.1646427 | -1.6584028 | -1.6950063 |            |                |
| DM10651P2 | 0.00473009 | 1.1148425  | 1.0364202  | -1.4159273 |            |                |
| DM07216P2 | 0.00474191 | -1.3026286 | -1.0050681 | 1.2655405  |            |                |
| DM13744P1 | 0.00474296 | -1.1130217 | -1.0237552 | 1.4277353  |            |                |
| DM11243P2 | 0.00475411 | 1.0802025  | -1.0631748 | -1.5909281 |            |                |
| DM11883P3 | 0.00475761 | 1.0554076  | 1.0292833  | 1.392616   |            |                |
| DM11261P1 | 0.00476028 | 1.0368122  | 1.1806841  | -1.2860674 |            |                |
| DM03794P1 | 0.00476987 | -1.115428  | -1.0528969 | -1.3229667 |            |                |
| DM00195P4 | 0.00477433 | 1.2386869  | 1.2661388  | -1.2716662 | LOC1001242 | XM_001608109.1 |

|           |            |            |            |            |             |                |
|-----------|------------|------------|------------|------------|-------------|----------------|
| DM12729P1 | 0.00477448 | -1.1619793 | -1.051532  | 1.0909932  |             |                |
| DM00960P1 | 0.00478365 | -1.1285754 | -1.0135356 | -1.199598  | BANF1       | NM_205562.1    |
| DM10478P1 | 0.00478828 | -1.008121  | 1.299613   | 1.335223   |             |                |
| DM03324P2 | 0.00483306 | 1.0536422  | -1.0524633 | 1.245071   | POPTRDRAFT  | XM_002306684.1 |
| DM06557P2 | 0.00484744 | 1.0278095  | 1.1002654  | 1.4226729  |             |                |
| DM11475P2 | 0.00486367 | -1.0805405 | -1.1532171 | -1.4169875 |             |                |
| DM11581P4 | 0.00486735 | 1.0886436  | -1.1079798 | -1.3723459 |             |                |
| DM00764P2 | 0.00487296 | -1.1855084 | -1.0951917 | -1.4003564 | NEMVEDRAFT  | XM_001632034.1 |
| DM11085P1 | 0.00487331 | -1.1930418 | -1.3001068 | -1.9625766 |             |                |
| DM03509P1 | 0.00488432 | -1.560998  | -1.2287954 | 1.1860482  |             |                |
| DM02722P1 | 0.0049021  | -1.0290678 | -1.0533532 | -1.4693267 | OLA1        | XM_856197.1    |
| DM09454P2 | 0.00490282 | 1.0832236  | 1.2941464  | -1.2326157 |             |                |
| DM12006P2 | 0.00492085 | 1.090489   | 1.0385834  | -1.13901   |             |                |
| DM01094P1 | 0.00492553 | 1.3196943  | 1.383665   | 1.4363302  | TRIADDRAFT  | XM_002117079.1 |
| DM10773P1 | 0.00494869 | 1.5625951  | 1.6121604  | 1.5549436  |             |                |
| DM05949P2 | 0.00495372 | 1.3394378  | 1.668379   | 1.8774776  | LOC658676   | XM_965040.1    |
| DM06848P1 | 0.00496041 | 1.071084   | 1.0157658  | -1.2776312 |             |                |
| DM05334P3 | 0.0049639  | -1.0670215 | -1.0901897 | -1.7397689 |             |                |
| DM00968P2 | 0.00498089 | 1.8005394  | 2.3064208  | 2.0489323  | DSEC\GM127  | XM_002037109.1 |
| DM06432P2 | 0.00498126 | -1.1712747 | -1.2262833 | -1.5591561 |             |                |
| DM11354P1 | 0.00498243 | 2.5689754  | 4.149077   | 4.53424    |             |                |
| DM07111P3 | 0.00498795 | 1.6337149  | 1.8032627  | 1.5686294  |             |                |
| DM11271P4 | 0.00499387 | -1.0096782 | -1.0439632 | 1.1988616  |             |                |
| DM08129P1 | 0.00499599 | 2.4825974  | 1.7477515  | -1.2620273 |             |                |
| DM02822P1 | 0.00499716 | -1.2206883 | -1.286321  | -1.3005623 |             |                |
| DM03022P1 | 0.00500138 | 1.1924807  | 1.2145246  | 1.7609416  | TGM4        | NM_001130909.1 |
| DM07045P1 | 0.00502603 | 1.0828125  | -1.0462881 | 1.5038326  |             |                |
| DM06905P2 | 0.00504654 | 1.2328329  | 1.3241856  | 1.1529009  |             |                |
| DM05154P2 | 0.00504687 | 1.101044   | -1.104569  | 1.4203998  | DGR1\GH217  | XM_001987076.1 |
| DM06032P1 | 0.00506981 | -1.204696  | -1.4831728 | -2.9731636 |             |                |
| DM11393P1 | 0.00509129 | -1.0788271 | -1.1213826 | -1.286418  |             |                |
| DM11040P1 | 0.00514891 | -1.0455483 | 1.1492465  | -1.2596611 |             |                |
| DM00768P3 | 0.00516399 | -1.0872457 | -1.2259887 | -1.4402072 | KLLA0F05005 | XM_455307.1    |
| DM04430P2 | 0.00517757 | -1.1484926 | -1.0386353 | -1.4878845 |             |                |
| DM06370P1 | 0.00520155 | 1.9895153  | 1.844341   | 1.2635264  | DSEC\GM249  | XM_002029583.1 |
| DM05505P2 | 0.00521221 | 1.1823105  | -1.6517869 | 1.4483571  |             |                |
| DM08043P3 | 0.00524781 | 1.0889949  | 1.204846   | -1.749926  |             |                |
| DM08737P4 | 0.00526645 | 1.592387   | 1.7921457  | -1.824528  |             |                |
| DM07215P1 | 0.0052959  | 1.6037005  | 1.8048236  | 2.0129142  |             |                |
| DM02639P2 | 0.00531963 | 1.2907627  | 1.5801884  | 1.6729913  | RSAD2       | NM_001025556.1 |
| DM03742P4 | 0.00534898 | 1.036488   | -2.590214  | 1.2701856  |             |                |
| DM00802P3 | 0.00536224 | 1.3722329  | 1.3027363  | 1.2475722  | LOC552832   | XM_625207.1    |
| DM05972P3 | 0.00536584 | -1.1376725 | 1.0569632  | -3.0547945 |             |                |
| DM02237P2 | 0.00536702 | -1.312503  | -1.1360589 | -1.605858  | PHF5A       | XM_001896429.1 |
| DM00219P2 | 0.00536974 | 1.299892   | 1.1370583  | 1.0043645  | AGAP_AGAP0  | XM_318292.2    |
| DM09634P3 | 0.00537859 | 1.2467135  | 1.0470351  | -1.4115654 |             |                |
| DM05279P3 | 0.00541844 | -2.5706909 | -4.351204  | -1.4093821 | POPTRDRAFT  | XM_002335211.1 |
| DM02485P1 | 0.00543046 | -1.6593745 | -2.1215293 | 1.0589445  | NEMVEDRAFT  | XM_001628525.1 |
| DM02663P1 | 0.00543369 | 1.1707207  | 1.1412679  | 1.6889399  |             |                |
| DM11663P1 | 0.00543424 | 1.0464902  | 1.1277534  | -1.2075804 |             |                |

|           |            |            |            |            |            |                |
|-----------|------------|------------|------------|------------|------------|----------------|
| DM00281P1 | 0.00543857 | 1.1479857  | 1.1371268  | 1.1388844  | MUT        | XM_532164.2    |
| DM11442P1 | 0.00545004 | -1.1318994 | -1.188279  | 1.0072247  |            |                |
| DM05816P4 | 0.00546258 | -1.0470749 | 1.0404507  | -1.600958  | AN6119.2   | XM_658631.1    |
| DM14241P3 | 0.00548346 | 1.1558527  | 1.1822901  | 2.327369   |            |                |
| DM04764P2 | 0.00550722 | -1.0473881 | 1.0276191  | -1.1769751 |            |                |
| DM07341P2 | 0.00552149 | -1.1730788 | -1.2797288 | 1.3390278  |            |                |
| DM09714P2 | 0.00552511 | -1.042534  | -1.0978912 | -1.4294417 |            |                |
| DM06383P2 | 0.00554638 | 2.7937164  | 3.4231355  | 2.7588084  |            |                |
| DM00502P3 | 0.00558119 | 1.0271266  | 1.0039723  | -1.1564989 | LOC580289  | XM_780359.2    |
| DM10974P1 | 0.0055922  | -1.2538877 | -1.4650277 | -1.2577477 |            |                |
| DM06916P3 | 0.00560076 | -1.1787382 | -1.1031432 | 1.220659   |            |                |
| DM06932P3 | 0.00561411 | 1.1420326  | 1.3563387  | 1.8775462  |            |                |
| DM04450P3 | 0.00562482 | 1.5140113  | 1.9093481  | -1.0967271 |            |                |
| DM07350P3 | 0.00563176 | 1.0779252  | 1.1319435  | 1.263295   |            |                |
| DM11727P1 | 0.00565141 | -1.0358424 | -1.1201521 | -1.2389246 | SN         | XM_396175.3    |
| DM05717P3 | 0.00569682 | 1.1014947  | 1.1432847  | -1.2110599 |            |                |
| DM05542P1 | 0.00572054 | -1.3547432 | -1.3755815 | 1.22151    |            |                |
| DM03542P2 | 0.00572226 | -1.040074  | -1.0407101 | -1.2150824 | DERE\GG185 | XM_001976854.1 |
| DM00438P2 | 0.00572648 | -1.1941177 | -1.0279157 | -2.1254168 | LOC1001646 | XM_001948913.1 |
| DM03889P1 | 0.00576045 | -1.0357101 | -1.039202  | -1.5137794 |            |                |
| DM06741P3 | 0.00577795 | -1.3629073 | -1.198336  | 1.3450285  |            |                |
| DM00011P3 | 0.00578057 | -1.0520557 | -1.0574632 | -1.210461  | DMOJ\GI199 | XM_002004510.1 |
| DM11463P2 | 0.0057831  | 1.2042644  | -1.0241519 | -1.1219583 |            |                |
| DM02775P1 | 0.00578434 | -1.0945956 | 1.5918195  | 1.7207797  | DNAJC28    | NM_001015977.1 |
| DM06494P2 | 0.00578507 | -1.131876  | -1.2819403 | -1.483735  |            |                |
| DM01165P1 | 0.00580773 | -1.1706953 | -1.2171118 | -1.5451936 |            |                |
| DM00321P2 | 0.00581375 | 1.1443186  | 1.3761959  | 1.4781358  | MONBRDRAF  | XM_001749025.1 |
| DM11726P3 | 0.00581917 | 1.0530442  | 1.088528   | -1.4131949 |            |                |
| DM12611P4 | 0.00582    | 1.2423525  | 1.2816371  | 1.4608959  |            |                |
| DM04676P1 | 0.00582297 | -1.107345  | -1.1456832 | 1.1472459  |            |                |
| DM08401P1 | 0.00582583 | -1.2389007 | -1.056996  | 2.110674   |            |                |
| DM09971P1 | 0.00584137 | 1.5005202  | 1.6342542  | 1.6192936  | DYAK\GE246 | XM_002097109.1 |
| DM09027P1 | 0.00584773 | -1.3084811 | -1.1151099 | -2.478854  |            |                |
| DM01308P1 | 0.00586579 | 1.0595663  | 1.0911913  | -1.2332551 |            |                |
| DM11479P1 | 0.00588664 | -1.1497908 | -1.2568604 | -2.2063024 |            |                |
| DM10180P1 | 0.00589355 | -1.4628001 | -1.3861139 | -1.1581104 |            |                |
| DM02399P2 | 0.00590383 | 1.1105443  | 1.0622178  | 1.2520502  | LOC1001236 | XM_001607215.1 |
| DM09195P3 | 0.00592923 | -1.3031138 | -1.1099644 | -1.4827675 |            |                |
| DM08984P1 | 0.00593516 | 1.0865351  | 1.0114948  | -1.1460451 |            |                |
| DM13939P2 | 0.00593692 | -1.0947407 | 1.0334433  | -1.4337049 |            |                |
| DM08565P1 | 0.00594094 | 1.2323198  | 1.5189035  | -1.2920971 |            |                |
| DM10954P1 | 0.0059527  | 1.0254195  | -1.1010159 | -1.3781844 |            |                |
| DM05216P1 | 0.00595589 | 5.509706   | 6.380978   | 4.0135565  |            |                |
| DM00629P1 | 0.00599029 | -1.1836174 | -1.0854039 | -1.4405346 | PWP2H      | NM_213047.1    |
| DM01006P4 | 0.00599746 | 1.0460702  | -1.1314734 | -1.2819809 | DGRI\GH245 | XM_001991997.1 |
| DM06968P1 | 0.00601108 | -1.1862593 | -1.1339496 | -1.4871739 |            |                |
| DM02657P2 | 0.0060155  | 1.0059992  | -1.1455808 | -1.6682506 |            |                |
| DM06767P1 | 0.00603921 | -1.1211716 | -1.1762676 | -2.1511068 |            |                |
| DM00789P1 | 0.00604246 | -1.1969333 | -1.3752731 | -1.2373688 | SEL1L      | NM_001096558.1 |
| DM00348P1 | 0.00604409 | -1.4495299 | -1.4108757 | -3.4733615 | LOC1000815 | XM_001512289.1 |

|           |            |            |            |            |             |                |
|-----------|------------|------------|------------|------------|-------------|----------------|
| DM11902P1 | 0.00605504 | 1.4927269  | 1.6238089  | 1.6095899  |             |                |
| DM00130P2 | 0.0060708  | -1.2344229 | -1.0961664 | -1.6371886 | DVIR\GJ2319 | XM_002053675.1 |
| DM02525P1 | 0.00608291 | -1.6443233 | -1.130176  | -2.7090793 | DPER\GL178C | XM_002029022.1 |
| DM04655P3 | 0.00611187 | 1.7626364  | 1.9209832  | 1.7674339  | LOC657581   | XM_001811711.1 |
| DM06434P1 | 0.00611982 | -1.0141791 | -1.1336153 | -1.3312974 | LOC584331   | XM_001196118.1 |
| DM12378P1 | 0.00612586 | 1.0745004  | 1.0284916  | 1.2888643  |             |                |
| DM05232P2 | 0.00614903 | 1.0197096  | -1.4394164 | -1.0778561 |             |                |
| DM03501P4 | 0.00616848 | -1.9054233 | -1.7389002 | -2.256148  |             |                |
| DM06396P1 | 0.00618051 | -1.1312811 | -1.1327459 | -1.3324326 |             |                |
| DM01316P3 | 0.00618198 | -1.0981586 | -1.093197  | -1.4930078 | LOC1002239  | XM_002199120.1 |
| DM09850P1 | 0.00618228 | 1.3042618  | 1.115696   | 1.3132831  |             |                |
| DM08638P2 | 0.00619973 | 1.1475166  | 1.299345   | 1.3752185  |             |                |
| DM00963P2 | 0.00620293 | 1.0185306  | -1.1871701 | -1.2245393 | VIB         | XM_624561.2    |
| DM00248P3 | 0.00621135 | -1.0364735 | 1.2618454  | 1.0414122  | U1C         | XM_001844951.1 |
| DM03298P3 | 0.00622176 | 1.5368123  | 1.6792637  | 1.2382041  |             |                |
| DM11291P3 | 0.00622381 | 1.1049063  | -1.2544675 | -1.9531116 |             |                |
| DM00395P1 | 0.00622966 | -1.19105   | -1.1984304 | -1.3444749 | LOC1000237  | XM_001375188.1 |
| DM03496P1 | 0.00623824 | -1.0146163 | 1.1088295  | -1.399222  |             |                |
| DM02030P2 | 0.00624904 | -1.0280819 | -1.0354531 | -1.2498688 | LOC692802   | NM_001046649.1 |
| DM06797P1 | 0.00624972 | 2.2201715  | 4.7851386  | 2.794578   |             |                |
| DM13085P2 | 0.00625608 | -1.1605545 | 1.2415298  | 1.405997   |             |                |
| DM01724P2 | 0.00626923 | -1.2331791 | -1.0348303 | 1.1558934  | DWIL\GK229  | XM_002074715.1 |
| DM05037P1 | 0.00627824 | 1.2487286  | 1.1180164  | 1.0723565  |             |                |
| DM01866P2 | 0.00628716 | -1.1364179 | -1.1972427 | -1.3770419 | LOC1002044  | XM_002158614.1 |
| DM11590P2 | 0.00629726 | 1.0229563  | -1.0171442 | -1.3186692 |             |                |
| DM08627P3 | 0.00630577 | -1.0478879 | 1.5024639  | 1.9272046  |             |                |
| DM14610P3 | 0.00630734 | 1.1334974  | -1.2306951 | 1.3529055  |             |                |
| DM10762P3 | 0.00631372 | -1.059105  | -1.5936329 | -1.8074386 |             |                |
| DM06007P1 | 0.00632377 | 2.4618142  | 2.1931045  | 1.9274796  |             |                |
| DM02409P1 | 0.00633523 | -1.1604011 | -1.3554459 | -1.3991362 | LOC1000566  | XM_001502591.2 |
| DM04478P3 | 0.00633536 | 3.000081   | 3.964953   | 3.7378454  |             |                |
| DM02760P1 | 0.00634132 | -1.0335052 | -1.0529137 | -1.1712872 | LOC1001686  | XM_001945818.1 |
| DM10717P3 | 0.00635982 | 1.1460781  | 1.3722745  | 1.5405802  |             |                |
| DM12531P2 | 0.00636103 | 1.5234038  | 1.5497063  | 1.6071223  |             |                |
| DM07678P2 | 0.00636637 | 1.2825766  | 1.6952826  | 1.4195049  |             |                |
| DM00164P1 | 0.00636951 | 1.045175   | -1.1363171 | -1.4115087 | LOC1001153  | XM_001600045.1 |
| DM06771P1 | 0.00638513 | -2.3005958 | -2.0371768 | 1.0929716  |             |                |
| DM02664P3 | 0.0063956  | -1.1601756 | -1.0599211 | -1.3617207 | B52         | NM_001170134.1 |
| DM06733P1 | 0.00642243 | -1.1631733 | -1.0390524 | 1.1364014  | DSIM\GD206  | XM_002103836.1 |
| DM09994P2 | 0.00642617 | 1.0008385  | -1.2268142 | -2.0655518 |             |                |
| DM05674P1 | 0.00643749 | -1.0613592 | 1.0047235  | -1.4482263 |             |                |
| DM06885P3 | 0.00644371 | 1.4633718  | 1.0415505  | -3.174557  |             |                |
| DM02435P3 | 0.00647745 | 1.0648166  | 1.088111   | 1.6274397  | COLP3ALPHA  | NM_214466.1    |
| DM15020P2 | 0.0065186  | -1.0402117 | -1.0050665 | 1.4259313  |             |                |
| DM06826P2 | 0.0065276  | -1.8570952 | -1.6865199 | -1.627335  |             |                |
| DM09937P1 | 0.00653489 | -1.178064  | -1.0694592 | 1.1352769  |             |                |
| DM01760P1 | 0.00655191 | -1.0022916 | -1.1400356 | -1.2149156 | AP1S2       | NM_001040591.1 |
| DM05000P3 | 0.00655403 | 1.2708638  | -1.2558678 | 1.1286175  |             |                |
| DM07891P3 | 0.00657021 | 1.3567394  | 1.5435257  | 1.6198511  |             |                |
| DM03277P1 | 0.00658439 | 1.0330039  | -1.0159093 | -1.2024074 |             |                |



|           |            |            |            |            |            |                |
|-----------|------------|------------|------------|------------|------------|----------------|
| DM14845P1 | 0.00659757 | 1.0112675  | 1.177287   | 1.6065801  |            |                |
| DM07846P1 | 0.00660651 | -1.0961194 | -1.135957  | -2.2699518 |            |                |
| DM00818P2 | 0.00661213 | 1.0153363  | -1.0399872 | -1.2527615 | LOC659684  | XM_965969.1    |
| DM00393P2 | 0.00661579 | -1.0702161 | -1.0170357 | -1.3171026 | LOC1001172 | XM_001601493.1 |
| DM13882P1 | 0.00665472 | -1.1244522 | 1.0539348  | 1.1035955  |            |                |
| DM07395P1 | 0.00666979 | -1.009265  | 1.2628903  | 1.9239839  |            |                |
| DM02155P2 | 0.00667324 | 1.0789698  | -1.0866503 | -1.2752473 | LOC1001160 | XM_001600561.1 |
| DM03942P1 | 0.00667547 | 1.106373   | 1.0994335  | 1.6353955  |            |                |
| DM11319P2 | 0.00668039 | -1.2149231 | -1.0421785 | -1.494126  |            |                |
| DM10782P2 | 0.00668586 | -1.0992323 | -1.1130705 | -1.3126357 |            |                |
| DM02494P1 | 0.00669227 | 1.0754157  | 1.3234409  | 1.4902573  | PTPRA      | NM_001127950.1 |
| DM03601P2 | 0.00670587 | 1.0836011  | -1.2352295 | 1.383381   |            |                |
| DM06314P1 | 0.0067116  | -1.1110615 | 1.0611392  | 1.9484427  |            |                |
| DM07244P3 | 0.00671538 | -1.0220523 | -1.1369008 | -1.2333689 |            |                |
| DM02259P1 | 0.00672874 | -1.3276179 | 1.0180107  | 1.5894337  |            |                |
| DM00353P1 | 0.00673176 | -1.0690819 | -1.1204746 | -1.4062742 | CCT5       | XM_393315.3    |
| DM06296P1 | 0.00675469 | 1.2775683  | -1.1173071 | -1.2509409 | GPD1       | XM_001154886.1 |
| DM10376P2 | 0.0067677  | -1.1661327 | 1.3734847  | 2.7246015  |            |                |
| DM07697P4 | 0.0067886  | -1.09681   | -1.1268516 | -1.3058398 |            |                |
| DM06855P3 | 0.0067931  | 1.0300401  | 1.0291144  | 1.2931087  |            |                |
| DM10211P1 | 0.00681991 | -1.1085287 | -1.0623782 | 1.2427251  |            |                |
| DM00193P4 | 0.00682323 | -1.110123  | -1.0284926 | -1.4675889 | DANA\GF209 | XM_001963958.1 |
| DM11449P1 | 0.00683771 | -1.2502456 | -1.1947054 | -1.6423937 |            |                |
| DM01373P2 | 0.00688194 | 1.6324222  | 1.53746    | 1.2487797  | DPSE\GA190 | XM_001358143.2 |
| DM01682P2 | 0.00689604 | -1.2188295 | -1.0713325 | 1.5617635  | DPSE\GA247 | XM_002138362.1 |
| DM04334P4 | 0.00690377 | 1.0527295  | 1.015033   | -1.1988568 |            |                |
| DM02575P1 | 0.00692998 | 1.1973091  | 1.3761021  | 1.3803002  | LOC1000188 | XM_001371871.1 |
| DM11276P2 | 0.00694795 | -1.0140572 | -1.0832442 | -1.3490434 |            |                |
| DM12083P3 | 0.00695375 | 1.9935218  | 2.02305    | 1.1331468  |            |                |
| DM07264P1 | 0.00697259 | -1.0026169 | -1.0705336 | -1.2594457 |            |                |
| DM00377P1 | 0.00697579 | 1.0164803  | -1.1969754 | -1.3368866 | DMOJ\GI155 | XM_002009822.1 |
| DM00895P1 | 0.00698272 | -1.056665  | -1.2215993 | -1.2353789 | DGRI\GH194 | XM_001990498.1 |
| DM12208P2 | 0.00699275 | -1.4505177 | -1.312736  | 1.1753991  |            |                |
| DM03010P1 | 0.00700993 | 1.2295673  | 1.5822614  | 1.8625427  | CG18619    | NM_164905.1    |
| DM12364P4 | 0.00701294 | 1.2049562  | 1.2562821  | 1.5483348  |            |                |
| DM04951P3 | 0.00705077 | 1.0645037  | -1.0016412 | -1.1082863 | LOC662293  | XM_968399.2    |
| DM11110P4 | 0.00705108 | -1.2531012 | -2.3640175 | -2.8559635 |            |                |
| DM02548P3 | 0.00706221 | -1.2218722 | -1.0486717 | -1.4540814 | BRAFLDRAFT | XM_002605516.1 |
| DM04384P3 | 0.00706533 | 1.0505214  | 1.0987076  | -1.129141  |            |                |
| DM03784P1 | 0.0070744  | 1.0851027  | -1.0616584 | 1.7082521  |            |                |
| DM01298P3 | 0.00708202 | -1.0659438 | -1.2053624 | -1.3657881 | LOC410115  | XM_393599.3    |
| DM13010P4 | 0.00708418 | -1.29637   | 1.1204984  | -1.7398369 |            |                |
| DM09799P3 | 0.00711718 | 1.1715888  | 1.4158729  | 1.8937986  |            |                |
| DM03388P3 | 0.00714231 | -1.137584  | -1.0577513 | -1.2568153 |            |                |
| DM01581P3 | 0.00714523 | -1.241326  | -1.1399189 | 1.1588191  | BRAFLDRAFT | XM_002589091.1 |
| DM07136P1 | 0.00717257 | -1.1155986 | -1.174649  | -2.274305  |            |                |
| DM09107P3 | 0.00719071 | -1.0997349 | 1.0140642  | -1.3255624 |            |                |
| DM13940P1 | 0.00720568 | -1.0414708 | 1.1017303  | 1.5042467  |            |                |
| DM00906P2 | 0.00723497 | -1.0660397 | -1.1087303 | -1.3101119 | LOC1000230 | XM_001369930.1 |
| DM02892P1 | 0.0072394  | 1.0308797  | -1.0205362 | 1.3325686  |            |                |

|           |            |            |            |            |                             |
|-----------|------------|------------|------------|------------|-----------------------------|
| DM01824P1 | 0.00726445 | 1.0700624  | -1.2669673 | -1.3414137 | DVIR\GJ1707 XM_002057372.1  |
| DM01622P4 | 0.0072735  | -1.0116465 | -1.0768481 | -1.3617984 | DVIR\GJ2226 XM_002050594.1  |
| DM03653P3 | 0.00727483 | -1.0475    | -1.0039873 | -1.4777972 | DVIR\GJ1756 XM_002052452.1  |
| DM03085P2 | 0.00728427 | -1.0478474 | 1.1005533  | -1.5786915 | CPIPJ_CPIJOC XM_001842324.1 |
| DM10455P1 | 0.00728536 | 1.4565713  | 1.6240982  | 1.4910319  |                             |
| DM05833P1 | 0.00728786 | -1.5498868 | -1.4668674 | -1.3827542 | LOC663663 XM_969699.1       |
| DM00025P2 | 0.00730096 | -1.3440197 | -1.3830047 | -1.3539841 | LOC1002013' XM_002162742.1  |
| DM05014P1 | 0.00730179 | -1.2410853 | -1.3760335 | 1.0713601  |                             |
| DM01617P3 | 0.00730229 | 1.5261599  | 2.058299   | 2.5157752  | SNOG_05978 XM_001796314.1   |
| DM03312P2 | 0.00732498 | -1.1746693 | 1.7056556  | 1.2942947  |                             |
| DM01960P3 | 0.0073556  | -1.0601017 | -1.1968447 | -1.3889612 | DVIR\GJ2320 XM_002053671.1  |
| DM06685P1 | 0.00735706 | -1.0517844 | 1.0133593  | -1.1973162 |                             |
| DM09909P4 | 0.00739235 | 1.1797982  | 1.7207628  | 1.7007363  |                             |
| DM11570P2 | 0.00741062 | 1.0887785  | -1.0669171 | 1.402518   |                             |
| DM06259P1 | 0.0074441  | -1.1721348 | -1.1139556 | -1.4322264 | TC00.104705 XM_803350.1     |
| DM08541P1 | 0.00747153 | -1.3548086 | -1.0775824 | -1.90832   |                             |
| DM09115P3 | 0.00747617 | -1.2545724 | -1.1501693 | -1.0464246 |                             |
| DM00577P1 | 0.00748695 | -1.0854633 | -1.1410694 | -1.3178693 | DMOJ\GI170' XM_002001779.1  |
| DM03035P1 | 0.00749613 | -1.0402716 | -1.0908495 | -1.2441108 | DGRI\GH137' XM_001993272.1  |
| DM01370P1 | 0.00753253 | -1.1007935 | -1.0469433 | -1.3003566 | AAEL_AAEL01 XM_001650137.1  |
| DM01283P1 | 0.00754981 | 1.179931   | 1.1581004  | 1.4074067  | PHOSRESTIN XM_001865064.1   |
| DM04057P3 | 0.00757468 | 1.3812497  | 1.3650336  | -1.5755162 |                             |
| DM00745P4 | 0.00760801 | 1.0438623  | -1.1187785 | -1.6270081 | LOC1001152' XM_001599874.1  |
| DM12332P3 | 0.00762076 | -1.1621433 | -1.1197174 | 2.2765188  |                             |
| DM02424P3 | 0.00764652 | 1.0112714  | 1.004946   | 1.4979167  | LOC659301 XM_965620.2       |
| DM02750P2 | 0.00767005 | -1.0205108 | 1.1255565  | 1.3305851  |                             |
| DM11499P1 | 0.00767974 | -2.0149465 | -2.2647026 | -1.8929979 |                             |
| DM13522P2 | 0.00769231 | -1.0709722 | 1.1531055  | 1.220952   |                             |
| DM11390P2 | 0.00769367 | -1.2527564 | -1.3021215 | -1.8583312 |                             |
| DM04255P1 | 0.00769687 | -1.0705572 | -1.038639  | -1.3117142 |                             |
| DM05350P4 | 0.00769888 | -1.039419  | 1.0250587  | -1.4531555 |                             |
| DM02145P2 | 0.00771173 | 1.278996   | 1.3655511  | 1.4290905  | MSF1 XM_001657148.1         |
| DM11367P4 | 0.00771356 | -1.1305392 | -1.0445741 | -1.3915104 |                             |
| DM08542P4 | 0.0077158  | -1.0008023 | 1.0098107  | -1.5107534 |                             |
| DM11328P1 | 0.00773993 | 1.5015559  | 1.7599249  | -1.0326744 |                             |
| DM03052P2 | 0.00774816 | -1.1212606 | -1.4709167 | 1.0793782  | DSIM\GD255 XM_002081658.1   |
| DM05318P2 | 0.00774857 | -1.4101579 | -1.3789101 | 1.1244566  |                             |
| DM04989P1 | 0.00777676 | 1.1455069  | -1.0572305 | -1.1661432 | DANA\GF146 XM_001961938.1   |
| DM08663P1 | 0.00788253 | -1.1617897 | -1.2700099 | -1.4099246 |                             |
| DM06699P3 | 0.00789329 | 1.0683159  | 1.1220835  | 1.5189383  |                             |
| DM03513P1 | 0.00791204 | -1.0953043 | -1.2333846 | -1.028263  | DMOJ\GI110' XM_002002751.1  |
| DM08148P1 | 0.00791921 | -1.0397421 | 1.8346858  | 1.44199    |                             |
| DM10620P3 | 0.00792686 | 1.1473614  | 1.1650187  | -1.2342104 |                             |
| DM01825P1 | 0.00793463 | 1.0913947  | -1.033481  | -1.4881223 |                             |
| DM04396P3 | 0.00793979 | 1.1114656  | -1.0734073 | -1.3054951 | LOC760983 XR_025742.1       |
| DM07747P3 | 0.00794037 | -1.1757435 | -1.1835946 | -1.4398923 | NEMVEDRAFT XM_001647469.1   |
| DM03070P2 | 0.00795447 | -1.2360439 | -1.3096681 | -1.3925884 | BRAFLDRAFT XM_002607778.1   |
| DM07431P1 | 0.00798837 | 1.0421652  | -1.0818499 | 1.3037003  |                             |
| DM13104P1 | 0.00799333 | 1.0266093  | 1.057062   | 2.0864787  |                             |
| DM02881P2 | 0.00800619 | -1.0730366 | 1.094775   | 1.7594843  | DERE\GG120 XM_001981390.1   |

|           |            |            |            |            |            |                 |
|-----------|------------|------------|------------|------------|------------|-----------------|
| DM00285P3 | 0.0080235  | -1.0774423 | -1.2396433 | 1.4171605  | DSEC\GM116 | XM_002044699.1  |
| DM00044P3 | 0.0080275  | -1.0569029 | -1.0861781 | -1.3576037 | LOC410026  | XM_393513.3     |
| DM02281P1 | 0.00806011 | 1.1289768  | 1.2076452  | 1.3058428  |            |                 |
| DM02778P3 | 0.00806595 | 1.1322445  | 1.1470387  | 1.1845309  | DGRI\GH106 | XM_001988289.1  |
| DM14330P3 | 0.00806985 | -1.1112089 | -1.059767  | 1.3827676  |            |                 |
| DM03347P1 | 0.00807516 | 1.1176103  | 1.0819274  | 1.4112426  |            |                 |
| DM15398P1 | 0.0080795  | 1.5656289  | 1.5820228  | 1.4771882  |            |                 |
| DM08304P2 | 0.00810775 | -1.5745851 | -1.4919724 | -1.738297  |            |                 |
| DM04254P1 | 0.00816872 | 1.1294109  | 1.0033116  | -1.2948083 |            |                 |
| DM04270P2 | 0.00817783 | 1.0428238  | -1.006595  | -1.2278801 | LOC413123  | XM_396574.2     |
| DM05034P2 | 0.00820239 | 1.0739527  | 1.0265335  | -1.3122661 | LOC1002234 | (XM_002191217.1 |
| DM03639P2 | 0.00822192 | 1.0942928  | -1.3321769 | -1.1822115 |            |                 |
| DM08579P1 | 0.00822605 | -1.3647847 | 1.0091056  | 1.4482083  |            |                 |
| DM01207P1 | 0.00823635 | -1.2242204 | -1.101905  | -1.2008375 | WDR61      | XM_536215.2     |
| DM06231P4 | 0.00824367 | 1.3127956  | 1.265437   | 2.227586   |            |                 |
| DM11430P1 | 0.00825303 | -1.0387406 | -1.3622681 | 1.0888524  |            |                 |
| DM00239P3 | 0.00827436 | -1.0815479 | -1.078208  | -1.4697002 | LOC1001656 | XM_001949345.1  |
| DM04502P1 | 0.00832852 | -1.3822389 | -1.5575902 | -1.0652846 |            |                 |
| DM12387P2 | 0.00832972 | 1.3446592  | 1.2145025  | 1.3386009  |            |                 |
| DM02751P3 | 0.00833935 | 1.2000438  | -1.1877388 | -1.3127608 | ATL2       | XM_001168098.1  |
| DM11797P3 | 0.00834324 | -1.022633  | -1.0117714 | -1.2819691 |            |                 |
| DM09084P1 | 0.00835801 | -1.3792725 | -1.1200845 | -1.2513462 |            |                 |
| DM06768P2 | 0.00837415 | -1.0047381 | 1.0712445  | 1.2328067  |            |                 |
| DM08072P3 | 0.00840039 | 1.0248502  | -1.0358434 | 1.2458977  |            |                 |
| DM07605P3 | 0.00843475 | -1.2138523 | -1.0817124 | -1.500319  |            |                 |
| DM11985P3 | 0.00843805 | -1.0304203 | -1.1914341 | -1.445276  |            |                 |
| DM08398P1 | 0.00845593 | 1.0518858  | -1.0815324 | -1.2702535 |            |                 |
| DM06042P3 | 0.00849071 | -1.521641  | -1.7404958 | -1.6671554 | LOC1001875 | (XM_002125820.1 |
| DM02048P1 | 0.00849716 | -1.0494943 | -1.088556  | -1.325892  | FUT6       | XM_001658942.1  |
| DM02225P1 | 0.0085083  | 1.1204011  | 1.2945799  | 1.4169194  | LOC575126  | XM_775331.2     |
| DM10053P2 | 0.00852346 | 6.0928507  | 6.2343574  | 3.9090593  |            |                 |
| DM02919P3 | 0.00854411 | 1.186799   | 1.4445527  | 1.0099446  |            |                 |
| DM00462P2 | 0.00854976 | -1.1379614 | -1.3214538 | -1.3923445 | DWIL\GK221 | XM_002066013.1  |
| DM03968P1 | 0.00856203 | 1.633815   | 1.9052199  | 1.4979278  |            |                 |
| DM00192P1 | 0.00857681 | 1.0015138  | -1.2289485 | -1.2329628 | LOC1001168 | (XM_001607793.1 |
| DM09580P2 | 0.0086034  | -1.7751479 | -1.6866641 | -2.54383   |            |                 |
| DM00052P3 | 0.00863187 | -1.4086324 | -1.6946143 | -1.5527836 | ISCW_ISCWC | XM_002403711.1  |
| DM03808P2 | 0.00865442 | -1.0880424 | -1.2841754 | -1.3759562 |            |                 |
| DM10878P2 | 0.00865801 | -1.1708252 | -1.3356111 | -1.4711703 |            |                 |
| DM00314P2 | 0.00866829 | -1.0248938 | -1.1853772 | -1.4598815 | LOC408412  | XM_391959.3     |
| DM07292P1 | 0.00870753 | 1.008391   | 1.1892233  | 1.701668   |            |                 |
| DM12833P2 | 0.00872118 | 1.0516509  | 1.0201242  | 1.3531249  |            |                 |
| DM00675P1 | 0.00872503 | -1.1673417 | -1.1611298 | -1.3773175 | DSIM\GD197 | XM_002102209.1  |
| DM02459P3 | 0.00872995 | -1.3279339 | -1.1529543 | 1.6932409  |            |                 |
| DM11006P2 | 0.00873712 | 1.1125425  | -1.0451399 | -1.3920819 |            |                 |
| DM14091P3 | 0.00875496 | -1.1878148 | -1.0490248 | 1.327682   |            |                 |
| DM09307P4 | 0.00876015 | -1.0308255 | -1.0809455 | -1.2977211 |            |                 |
| DM01236P1 | 0.00876061 | 1.2652105  | 1.1576577  | -1.1535527 |            |                 |
| DM00713P4 | 0.00878054 | -1.0761188 | -1.0902848 | -1.34618   | LOC1000184 | XM_001367196.1  |
| DM07923P1 | 0.00880027 | 1.1949306  | 1.7375724  | 1.5967597  |            |                 |

|           |            |            |            |            |             |                |
|-----------|------------|------------|------------|------------|-------------|----------------|
| DM05687P2 | 0.00881603 | -1.6669065 | -1.1165929 | -15.748243 |             |                |
| DM12797P3 | 0.00882722 | 17.76302   | 32.16642   | 5.1778717  | DVIR\GJ1632 | XM_002060216.1 |
| DM05196P3 | 0.00884144 | 1.1094291  | -1.016063  | -1.2193512 |             |                |
| DM03397P3 | 0.0088474  | -1.0594063 | -1.1382335 | -1.3404343 | DSIM\GD207  | XM_002104083.1 |
| DM11603P2 | 0.00885847 | -1.2437665 | -1.1057878 | -1.490802  |             |                |
| DM07919P1 | 0.00887407 | 1.0058737  | 1.1034094  | 1.3369113  |             |                |
| DM04647P2 | 0.0088978  | 1.1506486  | 1.240177   | 1.5083419  |             |                |
| DM06871P1 | 0.00891969 | -1.3574079 | -1.068914  | -1.0288105 |             |                |
| DM12388P1 | 0.00893725 | 1.0875543  | 1.0593615  | -1.2067945 |             |                |
| DM02487P3 | 0.00894828 | 1.5196201  | 1.6244274  | 1.5181334  | LOC1002270  | XM_002191176.1 |
| DM12751P1 | 0.00895159 | -1.1345268 | 1.1095952  | 1.1261812  |             |                |
| DM12802P2 | 0.00896897 | 1.0519825  | -1.3608378 | -1.4955391 |             |                |
| DM06155P2 | 0.009038   | 1.1190461  | 1.2577846  | 1.6269411  |             |                |
| DM03867P2 | 0.00904135 | 1.0205439  | 1.1197225  | -1.2264333 | DMOJ\GI116  | XM_002008738.1 |
| DM09111P3 | 0.00908399 | 1.0549182  | -1.1703193 | -1.3297634 |             |                |
| DM04419P2 | 0.00908791 | 1.0430298  | -1.005982  | 1.2273984  | GDH         | NM_170101.2    |
| DM10926P3 | 0.00909992 | -1.076819  | 1.4770747  | 1.0520952  |             |                |
| DM09975P2 | 0.0091055  | 1.4484297  | 1.6526079  | 1.3613988  |             |                |
| DM04070P4 | 0.00911982 | 1.104759   | -1.1040306 | -1.9594678 |             |                |
| DM10836P4 | 0.00912333 | 1.3541225  | 1.2687119  | 1.0147637  |             |                |
| DM02489P2 | 0.00916826 | -1.6386265 | -1.7547426 | -2.2303646 |             |                |
| DM05130P2 | 0.00917656 | 1.0085804  | 1.0638894  | 1.2625183  |             |                |
| DM02869P3 | 0.00918022 | 1.5525959  | 1.8023336  | 1.2544508  | AAEL_AAEL0C | XM_001654032.1 |
| DM07176P3 | 0.00918465 | -1.1755501 | -1.1313123 | 1.2550962  |             |                |
| DM04851P1 | 0.00921791 | 1.4692132  | 1.0654703  | -3.51946   |             |                |
| DM00218P3 | 0.00924298 | -1.2992578 | -1.5041627 | -1.2394013 | TRIADDRAFT  | XM_002109793.1 |
| DM12821P2 | 0.00930871 | 1.0823352  | -1.0176425 | -1.2120016 |             |                |
| DM12536P1 | 0.00932349 | -1.0351838 | -1.175444  | 1.3983653  |             |                |
| DM11692P2 | 0.0093262  | -1.7115005 | -1.0476147 | -29.834429 |             |                |
| DM05727P2 | 0.00936635 | 1.0564587  | -1.1893957 | -1.2792736 |             |                |
| DM12816P1 | 0.0093895  | 1.3864142  | 1.6975486  | 1.3849903  |             |                |
| DM06382P1 | 0.00941602 | 1.1689212  | 1.4494457  | -1.3431804 |             |                |
| DM11434P1 | 0.00942791 | -1.3340739 | -1.121444  | -2.3704388 |             |                |
| DM12510P2 | 0.00947696 | 1.4012257  | 1.7425342  | 1.1014777  |             |                |
| DM05765P3 | 0.00948034 | 1.0113372  | -1.0827742 | -1.3789983 |             |                |
| DM05663P1 | 0.00948546 | -1.120264  | -1.238528  | -1.923998  | LOC411502   | XM_394975.3    |
| DM00180P3 | 0.00950045 | -1.1489028 | -1.0969996 | -1.3679115 | CTBP        | NM_001014617.1 |
| DM11784P2 | 0.00951536 | -1.1192418 | -1.2869288 | -1.0898623 |             |                |
| DM00071P3 | 0.00952915 | -1.076405  | -1.1327804 | -1.3492265 | PTRG_02664  | XM_001932962.1 |
| DM08476P3 | 0.00953527 | 1.1934649  | 1.009879   | 1.2810681  |             |                |
| DM03914P3 | 0.0095435  | -1.0309254 | -1.0698403 | 1.118121   | AAEL_AAEL0C | XM_001649989.1 |
| DM06985P3 | 0.00954416 | 1.1057112  | 1.0527937  | 1.3659743  |             |                |
| DM03705P1 | 0.00954792 | -1.1906303 | 1.0237218  | -1.3554298 | GLYR1       | NM_001030494.1 |
| DM03651P1 | 0.00955904 | 1.4153179  | 1.5784605  | 1.4883109  | MGC165715   | NM_001102129.1 |
| DM09119P4 | 0.00957241 | -1.1882191 | 1.004312   | 1.2564598  |             |                |
| DM11815P4 | 0.00958317 | -1.1166722 | -1.2127274 | -1.4170821 |             |                |
| DM05483P1 | 0.00958349 | -1.2535346 | -1.0318971 | 1.4818517  |             |                |
| DM06965P1 | 0.00959158 | 1.0593094  | 1.0340643  | -1.2460793 |             |                |
| DM08098P2 | 0.00960158 | 1.4813389  | 1.6518927  | 1.4673007  |             |                |
| DM09162P2 | 0.00961991 | 1.1549985  | 1.215161   | 1.4044522  |             |                |

|           |            |            |            |            |                            |
|-----------|------------|------------|------------|------------|----------------------------|
| DM10206P1 | 0.00963348 | 1.0618579  | -2.588204  | 1.8068147  |                            |
| DM09832P1 | 0.00965989 | -1.031867  | 1.0251399  | -1.3124746 |                            |
| DM11977P1 | 0.00967267 | -1.1129112 | -1.1115757 | -1.2983752 |                            |
| DM04705P1 | 0.00968826 | 1.1603345  | 1.4819914  | 1.6047554  |                            |
| DM04326P2 | 0.00969614 | -1.120935  | 1.0424781  | 1.323406   | LOC1002079 XM_002160124.1  |
| DM00394P2 | 0.00969734 | -1.0132895 | 1.0804665  | -1.1878217 | BMPR1A NM_009758.4         |
| DM13574P3 | 0.00974387 | 1.0556684  | 1.1497651  | -1.4033402 |                            |
| DM05081P2 | 0.00975029 | 1.1413908  | 1.0971056  | -1.0450598 |                            |
| DM07305P1 | 0.00975649 | -1.0183022 | -1.0421472 | -1.2131177 |                            |
| DM11834P3 | 0.00977485 | 1.3536671  | 1.235399   | 1.2528023  |                            |
| DM10537P2 | 0.00977796 | -1.0811236 | -1.0032048 | 1.3574975  |                            |
| DM07539P1 | 0.00983624 | 1.1277307  | 1.2914015  | 1.1204137  |                            |
| DM01157P1 | 0.00986366 | 1.0620543  | 1.265539   | 1.8003316  |                            |
| DM04551P2 | 0.00990856 | 1.0741444  | 1.3064207  | 1.4085472  |                            |
| DM04290P2 | 0.00994111 | -2.2119226 | -1.4327722 | -1.6796756 |                            |
| DM09372P1 | 0.0099439  | -1.0674334 | 1.2395078  | -1.0895414 |                            |
| DM01218P1 | 0.00995615 | -1.0301197 | -1.0497379 | -1.4796627 |                            |
| DM01224P2 | 0.00996188 | 1.049052   | -1.0529072 | -1.1646001 | DSIM\GD234 XM_002078442.1  |
| DM12454P4 | 0.00997119 | 1.3584421  | 1.4078077  | 1.634826   |                            |
| DM05993P1 | 0.00999797 | -1.1136671 | -1.1706482 | -1.388503  | KPOL_1052P2 XM_001644488.1 |
| DM08713P3 | 0.01000522 | -1.2010763 | -1.1014365 | -1.4341834 |                            |
| DM08070P3 | 0.01001106 | 1.00936    | 1.3204169  | 1.7039775  |                            |
| DM12901P1 | 0.01001326 | 1.0163403  | -1.2742146 | -1.6627078 |                            |
| DM00328P2 | 0.01005077 | 1.1046993  | -1.0235467 | -1.2077619 | LOC413831 XM_397270.3      |
| DM04416P2 | 0.01005081 | 1.2085987  | 1.2029132  | 1.5817541  | LOC550801 XM_623190.2      |
| DM10128P3 | 0.01005452 | 1.0286688  | 1.0043683  | -1.248389  |                            |
| DM08545P2 | 0.01005839 | -1.1464417 | 1.1775384  | 1.1861371  |                            |
| DM06359P3 | 0.01008919 | 1.3244962  | 1.4114778  | 1.5846144  | ISCW_ISCWC XM_002414028.1  |
| DM11682P2 | 0.01010197 | 1.2039171  | -1.0099767 | -1.1004838 |                            |
| DM06924P4 | 0.01012293 | 1.211524   | 1.395168   | 1.3873801  |                            |
| DM07237P1 | 0.01012799 | 1.4831028  | 1.3928912  | 1.4695889  | DWIL\GK105 XM_002074398.1  |
| DM10641P2 | 0.01013041 | -1.0811607 | -1.0290316 | -1.5049222 |                            |
| DM11670P2 | 0.01014365 | -1.2675192 | -1.2797616 | -1.914682  |                            |
| DM00359P3 | 0.01014646 | 1.2316393  | 1.1904906  | -1.1724422 | DMOJ\GI191 XM_002005337.1  |
| DM12744P3 | 0.01015567 | -1.1289376 | 1.0427529  | 1.3977374  |                            |
| DM04792P1 | 0.01018068 | -1.1806219 | 1.03603    | 1.924187   |                            |
| DM14261P2 | 0.01018825 | 1.2077699  | 1.3928616  | 1.2348028  |                            |
| DM04910P1 | 0.01021562 | -1.1393747 | 1.3337991  | 1.1033279  |                            |
| DM07299P1 | 0.01022344 | 1.0324731  | 1.1007113  | -1.2489183 |                            |
| DM06917P2 | 0.01024604 | -1.0808301 | -1.0103815 | -1.4266237 |                            |
| DM00355P1 | 0.01033137 | 1.3526866  | 1.6384698  | 1.9657547  | LOC658676 XM_965040.1      |
| DM05931P3 | 0.01033358 | 1.5431832  | 1.5014894  | 1.893062   |                            |
| DM05642P3 | 0.01033443 | 1.097901   | -1.05236   | 1.6948025  |                            |
| DM04165P2 | 0.0103536  | -1.128641  | 1.2701223  | 1.5167589  |                            |
| DM11931P1 | 0.01036019 | 3.5334983  | 4.739804   | 2.1301894  |                            |
| DM03464P1 | 0.01039256 | 1.3504316  | 1.3328123  | -1.0269265 | FG02702.1 XM_382878.1      |
| DM04771P1 | 0.01040624 | 1.1509926  | 1.0593215  | -1.2435707 |                            |
| DM07975P1 | 0.01041276 | -1.8459024 | -1.2886977 | 1.1676481  |                            |
| DM10907P2 | 0.01043481 | -1.0044196 | -1.1620628 | -1.2920326 | DSEC\GM113 XM_002041753.1  |
| DM05452P1 | 0.01044402 | 1.0288291  | -1.1368095 | 1.0867167  |                            |

|           |            |            |            |            |             |                |
|-----------|------------|------------|------------|------------|-------------|----------------|
| DM06128P2 | 0.01044679 | -1.0402384 | -1.0499418 | 1.3517995  | LOC1001143  | XM_001607754.1 |
| DM03598P2 | 0.01047415 | 1.1711231  | -1.2183545 | -1.370918  | DPSE\GA280  | XM_002133299.1 |
| DM01876P1 | 0.01048315 | 1.0466219  | 1.0940425  | -1.6565974 | NCU01464    | XM_951648.2    |
| DM11972P3 | 0.01048813 | -1.1820174 | -1.083863  | -1.425862  | LOC1002096  | XM_002154218.1 |
| DM01371P3 | 0.01050169 | -1.2416282 | -1.07176   | -1.4316202 |             |                |
| DM15286P3 | 0.01050213 | -1.2675502 | -1.1853448 | 1.0652174  |             |                |
| DM03943P3 | 0.01055619 | -1.0970668 | -1.2482743 | -1.365019  |             |                |
| DM12561P1 | 0.01055771 | -1.0486602 | -1.0607295 | -1.3747791 | DGRI\GH115  | XM_001989018.1 |
| DM02872P3 | 0.01057863 | 1.1850091  | 1.1792991  | 1.6160204  |             |                |
| DM09080P3 | 0.0105863  | 1.108821   | 1.0971918  | 1.6290419  |             |                |
| DM09942P2 | 0.01061674 | 1.1534863  | 1.5944953  | 1.3966413  |             |                |
| DM01107P1 | 0.01061886 | -1.2156969 | -1.5331367 | 1.1751735  |             |                |
| DM03873P4 | 0.01062641 | -1.3292624 | -1.4668915 | -1.5618274 | CG2918      | NM_001169174.1 |
| DM00701P1 | 0.01063269 | -1.1469342 | -1.3810642 | -1.3800669 | SND1        | XM_532436.2    |
| DM02397P1 | 0.01063721 | -1.587281  | -1.6754144 | -1.666288  | LOC1001875  | XM_002125820.1 |
| DM01145P3 | 0.01064814 | -1.1190621 | -1.063334  | -1.4213347 | LOC1002082  | XM_002165850.1 |
| DM05964P2 | 0.01065731 | 1.190089   | 1.6712043  | 2.0390089  |             |                |
| DM12468P2 | 0.01066186 | 1.0439571  | -1.0373203 | 1.5852314  |             |                |
| DM11927P1 | 0.01066926 | -1.3706466 | -1.4270822 | 1.7134346  |             |                |
| DM12099P4 | 0.01068436 | 2.8429027  | 4.235189   | 4.306479   |             |                |
| DM02809P2 | 0.01071166 | -1.1534616 | -1.1210152 | -1.3991021 | LOC1001163  | XM_001608252.1 |
| DM09791P4 | 0.01076083 | 1.1599756  | -1.0806235 | -1.3343531 |             |                |
| DM06289P3 | 0.01076952 | -1.0100397 | -1.0198786 | -1.2473621 | LOC1001705  | NM_001130305.1 |
| DM11715P2 | 0.01078016 | -1.2287078 | -1.0661348 | -1.4761201 |             |                |
| DM01913P1 | 0.01079022 | -1.1498129 | -1.1577497 | -1.488886  | DMOJ\GI153  | XM_002001701.1 |
| DM09545P1 | 0.0108067  | -1.1792338 | 1.0472147  | 1.2062356  |             |                |
| DM09166P2 | 0.01081698 | 1.0344536  | -1.2635328 | -1.4517893 |             |                |
| DM11358P3 | 0.01082412 | -1.0144666 | -1.1163596 | -1.208131  | LOC655443   | XM_961987.1    |
| DM02776P1 | 0.01085091 | 1.2867659  | -1.9494109 | 2.6737087  | ISCW_ISCWC  | XM_002415119.1 |
| DM09897P3 | 0.01086777 | 1.4466383  | 1.3939202  | 1.880615   |             |                |
| DM08130P3 | 0.01087195 | 1.1590115  | 1.5445337  | 1.748114   |             |                |
| DM02858P4 | 0.01087333 | 1.0283484  | 1.3011899  | 1.1031387  | DGRI\GH227  | XM_001995140.1 |
| DM09590P1 | 0.01089655 | -1.0077516 | 1.0674192  | -2.0404518 |             |                |
| DM10450P3 | 0.01092307 | -1.1252743 | 1.0592239  | 1.3256384  |             |                |
| DM05128P3 | 0.01095117 | -1.200544  | -1.242644  | -1.4499407 |             |                |
| DM05458P1 | 0.01096981 | 1.0619276  | 1.0317436  | -1.1708392 |             |                |
| DM08975P1 | 0.01097291 | 1.125526   | 1.003253   | 1.2804685  |             |                |
| DM02077P4 | 0.01101194 | -1.0375034 | 1.0131854  | -1.295536  | LOC550827   | XM_623217.2    |
| DM13323P2 | 0.01102571 | 1.0060117  | 1.0557147  | 1.3924632  |             |                |
| DM01344P1 | 0.01102757 | 1.0868193  | -1.003401  | -1.4943931 | EXD2        | NM_001114406.1 |
| DM01197P3 | 0.01105548 | -1.1010214 | -1.1210665 | -1.507831  | BRAFLDRAFT  | XM_002609664.1 |
| DM02378P3 | 0.01105935 | 1.0250202  | 1.1414491  | -1.1289296 | DMOJ\GI221  | XM_002001114.1 |
| DM01875P1 | 0.01107098 | 1.1240563  | 1.0273825  | -1.2215381 | DYAK\GE225  | XM_002095656.1 |
| DM01277P1 | 0.0110839  | 1.0824519  | -1.1382351 | -1.3945023 | AP3M1       | XM_546170.2    |
| DM08720P2 | 0.01109725 | 1.2875452  | 1.4492706  | 1.2386729  |             |                |
| DM06224P2 | 0.01112169 | -1.3060538 | -1.0832629 | -1.0718026 | LOC552328   | XM_624704.2    |
| DM11994P1 | 0.01114985 | 1.0600107  | 1.2525603  | 1.2154987  |             |                |
| DM11483P3 | 0.01115877 | -1.0663712 | -1.2083657 | -1.359888  |             |                |
| DM06055P1 | 0.01116165 | 2.0863774  | 2.5966148  | 2.0438986  | TAT-6       | NM_071457.1    |
| DM01915P3 | 0.01116516 | -1.149053  | -1.1991545 | -1.3551579 | AAEL_AAEL01 | XM_001654630.1 |

|           |            |            |            |            |                             |
|-----------|------------|------------|------------|------------|-----------------------------|
| DM08106P2 | 0.01117724 | -1.6017814 | -1.678667  | 1.5243701  |                             |
| DM10080P3 | 0.01119162 | -1.2298971 | -1.1020814 | 1.1509867  |                             |
| DM04184P1 | 0.011194   | 1.1743636  | 1.4148053  | 1.8321166  |                             |
| DM02646P3 | 0.01121093 | 1.139921   | 1.074598   | 1.3401352  | LOC661163 XM_967342.2       |
| DM01299P2 | 0.01121791 | 1.0848002  | -1.0138401 | -1.2392318 | LOC1001660' XM_001947633.1  |
| DM00952P2 | 0.01123663 | 1.31885    | 1.2357816  | -1.1556787 | DWIL\GK229' XM_002074790.1  |
| DM01897P4 | 0.01123905 | 1.1898881  | -1.5152698 | 1.3885468  | CPAP3-D2 NM_001172382.1     |
| DM00628P2 | 0.01128103 | -1.1414285 | -1.003187  | -1.324116  | LOC578850 XM_778994.2       |
| DM12476P3 | 0.01128342 | 1.1022247  | -1.1119523 | 1.6216798  |                             |
| DM03815P2 | 0.01128379 | 1.0938973  | 1.0838572  | 1.6400094  | DPER\GL249' XM_002021130.1  |
| DM04778P2 | 0.01128489 | 1.0452889  | -1.1086655 | 1.2206168  |                             |
| DM12086P2 | 0.01129696 | -1.2254567 | -1.1370956 | -1.3258493 |                             |
| DM04324P3 | 0.01130629 | -1.0283654 | -1.0794299 | -1.3661282 |                             |
| DM09145P1 | 0.0113481  | -1.1904972 | -1.0412861 | 1.1971289  |                             |
| DM09323P4 | 0.01141861 | 1.0052241  | -1.1109911 | 1.3750755  |                             |
| DM05522P4 | 0.01142484 | -1.5089043 | -1.5718845 | -1.3244017 |                             |
| DM06784P2 | 0.01148539 | 1.0488821  | 1.0107293  | 1.3120676  |                             |
| DM02125P3 | 0.01148647 | 1.1592633  | 1.3999324  | 1.0344622  |                             |
| DM01982P1 | 0.01154367 | 1.3575313  | 1.2773244  | 1.3046662  | NEMVEDRAFT XM_001634353.1   |
| DM13956P3 | 0.01154675 | -1.2402053 | 1.5441544  | 1.136939   | GSPATT0001' XM_001453233.1  |
| DM10123P1 | 0.01156586 | -1.1301506 | -1.0011293 | 1.2103696  |                             |
| DM07102P4 | 0.01156861 | 1.1185839  | 1.0879856  | -11.292371 |                             |
| DM00111P1 | 0.01156884 | -1.0127151 | -1.2055262 | -1.1041344 | LOC1001229' XM_001606506.1  |
| DM09081P2 | 0.01156991 | 1.3024623  | 1.545377   | -1.0706077 |                             |
| DM12630P2 | 0.01158069 | 1.0757291  | -1.2309397 | 1.5924271  |                             |
| DM05386P3 | 0.01159014 | -1.2086613 | -1.0073154 | 1.8151975  | NEMVEDRAFT XM_001639293.1   |
| DM14523P1 | 0.01159434 | -1.3155929 | 1.1865567  | 1.6112623  |                             |
| DM00007P1 | 0.01160821 | 1.0443203  | -1.0640287 | -1.2671636 | LOC551386 XM_623781.2       |
| DM03206P1 | 0.01161529 | 1.0598673  | -1.1591198 | -1.176388  | AAEL_AAEL01' XM_001663606.1 |
| DM14317P1 | 0.01162688 | 1.0689777  | 1.1617578  | 1.2975658  |                             |
| DM04855P2 | 0.01163115 | -1.0806974 | 1.0713124  | 1.2326516  | DPSE\GA270' XM_002137070.1  |
| DM08488P1 | 0.01163414 | -1.025884  | -1.1056167 | -1.2706553 |                             |
| DM07173P1 | 0.01165734 | -1.1614771 | -1.0026242 | -1.292262  |                             |
| DM00863P2 | 0.01166774 | 1.049193   | 1.0238996  | 1.1510477  | DYAK\GE143' XM_002092764.1  |
| DM08761P4 | 0.01167557 | -1.0424539 | -1.5422899 | 1.9617904  |                             |
| DM06335P1 | 0.01168229 | 1.1642275  | 1.1430551  | -1.0184675 |                             |
| DM08340P3 | 0.01170519 | 1.1112047  | -1.1656184 | -1.209276  |                             |
| DM14620P1 | 0.01171605 | 1.0691123  | 1.0712092  | -1.3046317 |                             |
| DM12439P1 | 0.01171638 | -1.0080737 | -1.0925843 | -1.6768602 | DWIL\GK195 XM_002062740.1   |
| DM01068P1 | 0.01174196 | -1.186133  | -1.1715633 | -1.4015926 | CG8258 NM_136574.2          |
| DM13765P3 | 0.01176175 | -1.0293152 | -1.1306866 | 1.2820295  |                             |
| DM09324P2 | 0.01176404 | 1.0763077  | 1.0196452  | -1.236072  |                             |
| DM11752P2 | 0.01182285 | 1.0362004  | 1.0183917  | -1.1612551 |                             |
| DM05777P3 | 0.01182693 | 1.0028571  | -1.1147441 | -1.2756326 |                             |
| DM06974P1 | 0.0118489  | -1.0880246 | 1.0572073  | -1.3351605 |                             |
| DM14064P3 | 0.01185087 | 1.0064416  | -1.0241922 | 1.5443327  | DVIR\GJ1913 XM_002054973.1  |
| DM03489P1 | 0.01187192 | 1.1318138  | -1.2510668 | 1.5954114  | CPIPJ_CPIJ01 XM_001866203.1 |
| DM04934P4 | 0.01189422 | 1.0678782  | 1.0097537  | -1.3300388 |                             |
| DM06346P1 | 0.01189548 | 1.2645127  | 1.053011   | 1.7076607  |                             |
| DM07736P4 | 0.01191271 | -1.2283782 | -1.0146358 | 1.2589513  |                             |

|           |            |            |            |            |                            |
|-----------|------------|------------|------------|------------|----------------------------|
| DM05054P1 | 0.01191918 | 1.118903   | 1.0452832  | -1.223902  |                            |
| DM08949P1 | 0.01192027 | 1.0961889  | -1.132995  | 1.2944628  |                            |
| DM02247P2 | 0.01192425 | -1.3854538 | -1.4891596 | -1.6689509 | DANA\GF141\XM_001962943.1  |
| DM11527P3 | 0.01192471 | 1.1242515  | 1.0031619  | -1.351712  |                            |
| DM09717P1 | 0.01193059 | 1.0527644  | 1.0445026  | -1.314228  |                            |
| DM10721P1 | 0.01193674 | 1.137782   | 1.0663855  | -1.3036674 | DWIL\GK238\XM_002064450.1  |
| DM01752P3 | 0.01195735 | -1.3710345 | -2.0807066 | -2.427881  | LOC733041 NM_001047033.1   |
| DM10785P2 | 0.01195874 | -1.0316603 | -1.0070289 | -1.3810018 |                            |
| DM12401P3 | 0.01195961 | -1.3051475 | -1.1659613 | -2.2188337 |                            |
| DM10838P2 | 0.01196103 | 1.3388063  | 1.4282267  | 1.2122265  |                            |
| DM01111P1 | 0.01200027 | 1.1523545  | -1.1307782 | -1.2410833 | MAPKAPK3 NM_001079394.1    |
| DM00313P1 | 0.01200504 | -1.0452437 | 1.0575765  | -1.3028268 | LOC1001600\XM_001950296.1  |
| DM10117P1 | 0.01201456 | -1.2566919 | -1.029796  | 1.2542226  |                            |
| DM06336P1 | 0.01201525 | 1.4647577  | -1.1388332 | 1.469673   | NB001 XM_002158539.1       |
| DM01703P3 | 0.012034   | -1.0661625 | -1.0896113 | -1.3942645 | DSEC\GM201\XM_002033852.1  |
| DM09237P1 | 0.01205529 | 1.7283369  | 3.1045654  | -1.2772304 |                            |
| DM10583P3 | 0.01207654 | 1.1839373  | 1.3213342  | 1.0163434  |                            |
| DM01658P1 | 0.01207767 | 1.0224718  | -1.0789981 | 1.1949084  | DWIL\GK162\XM_002067217.1  |
| DM12137P2 | 0.0121068  | -1.1335601 | -1.2266867 | -1.1668037 |                            |
| DM05024P4 | 0.0121316  | -1.1584975 | -1.1680653 | -1.5203468 |                            |
| DM05422P2 | 0.01214892 | -1.0672315 | -1.0849984 | 1.1200777  | DPSE\GA207\XM_001357610.2  |
| DM05575P4 | 0.01217263 | 1.150326   | -1.2283318 | 1.1412401  |                            |
| DM02366P3 | 0.01218082 | -1.2494522 | -1.299769  | -1.5687511 | ISCW_ISCWC\XM_002408330.1  |
| DM10876P1 | 0.01218309 | 1.1171471  | -1.0234296 | -1.2009089 |                            |
| DM12429P1 | 0.01220785 | -1.1032467 | -1.0459917 | -1.2794166 |                            |
| DM03080P2 | 0.01227681 | -1.2479458 | -1.2540778 | -1.1637015 | BRAFLDRAFT\XM_002601566.1  |
| DM11191P1 | 0.01227703 | 1.3256066  | 1.151767   | -1.3389472 |                            |
| DM02204P1 | 0.01228595 | -1.0854099 | -1.0243196 | -1.1689938 | ARD1A NM_001135839.1       |
| DM07389P1 | 0.0122866  | 1.2857921  | 1.3069232  | -1.5147762 |                            |
| DM07057P1 | 0.01228895 | -1.0436188 | 1.0286868  | -1.2553749 |                            |
| DM03146P2 | 0.01230376 | -1.0834646 | -1.149204  | -1.3138926 |                            |
| DM15323P1 | 0.01233774 | 1.0638502  | 1.2338514  | 1.4468395  |                            |
| DM12718P4 | 0.01233911 | 1.2738501  | 1.2986057  | 1.6657772  |                            |
| DM11863P4 | 0.01236584 | -1.2308534 | -1.2260503 | -1.8373369 |                            |
| DM02595P4 | 0.01237961 | -1.2164553 | -1.0545765 | 1.0343663  | DMOJ\GI242\XM_001998866.1  |
| DM03687P1 | 0.01239992 | 1.2826883  | -1.401622  | -1.0225693 | BRAFLDRAFT\XM_002599296.1  |
| DM04206P3 | 0.0124106  | -1.066472  | -1.1357181 | -1.4151419 | DVIR\GJ1115\XM_002058700.1 |
| DM13159P2 | 0.01241633 | 1.8036737  | 2.2272575  | -1.2003675 |                            |
| DM02178P2 | 0.01242322 | 1.0703825  | -1.2081283 | -1.0784587 | DANA\GF232\XM_001964473.1  |
| DM06598P1 | 0.01242967 | -1.2673186 | -1.4774528 | -1.1940527 |                            |
| DM07921P1 | 0.01244288 | 1.2097535  | 1.406702   | 1.3443977  |                            |
| DM11675P1 | 0.0124808  | 1.2531466  | 1.3548148  | 1.2524086  |                            |
| DM03273P1 | 0.01250554 | 1.142129   | -1.0726563 | 1.3529309  | LOC1001612\XM_001951787.1  |
| DM14326P4 | 0.01251025 | -1.2218548 | 1.1153457  | -1.3709518 | DPSE\GA106\XM_001353969.2  |
| DM06211P2 | 0.01251617 | -1.4229666 | -1.0553685 | 1.2224048  |                            |
| DM09569P3 | 0.01257035 | 2.3816197  | 2.009339   | 1.7608826  |                            |
| DM06909P1 | 0.01259162 | -1.1580169 | -1.0048723 | 1.3149458  |                            |
| DM10569P3 | 0.01261094 | 1.218058   | 1.4206123  | 1.5995376  |                            |
| DM01391P1 | 0.01262219 | 1.0952874  | -1.0881151 | -1.2563155 | DMOJ\GI133\XM_002008117.1  |
| DM01369P1 | 0.01265341 | -1.0027663 | -1.2390187 | -1.2422426 | IDE XM_534963.2            |



|           |            |            |            |            |             |                |
|-----------|------------|------------|------------|------------|-------------|----------------|
| DM06337P4 | 0.01265922 | 1.0718417  | 1.2300134  | 1.5857317  |             |                |
| DM02063P1 | 0.01267825 | -1.4557472 | -1.1745394 | 1.3179772  |             |                |
| DM07286P2 | 0.01269089 | 1.1645314  | 1.5928546  | 1.8080722  | MONBRDRAF   | XM_001747075.1 |
| DM01052P3 | 0.01270728 | -1.0042516 | 1.0084077  | -1.2811866 | TKV         | XM_391989.3    |
| DM04370P2 | 0.01271947 | 1.1360657  | 1.3440945  | -1.0668246 |             |                |
| DM09934P1 | 0.01278335 | 1.6116513  | -1.1072088 | -1.6628592 | DYAK\28SRR  | XR_050467.1    |
| DM07959P3 | 0.01278626 | -1.083652  | -1.0738144 | -1.4361715 |             |                |
| DM05442P3 | 0.01280588 | 1.1362275  | 1.2412579  | -1.152266  |             |                |
| DM06165P1 | 0.01282277 | -1.0567583 | -1.0301163 | 1.2786884  | CATRIN      | XM_001846447.1 |
| DM03780P2 | 0.012824   | -1.1525784 | -1.099955  | -1.3686818 |             |                |
| DM02446P1 | 0.01282905 | -1.2584696 | -1.1644315 | -1.3349968 | NEMVEDRAFT  | XM_001639323.1 |
| DM10513P2 | 0.01284206 | 1.1335033  | 1.0803051  | -1.0480108 |             |                |
| DM14128P3 | 0.01285211 | -1.2775042 | -1.21702   | -1.4360147 |             |                |
| DM11886P1 | 0.01285876 | 1.2098261  | 1.3113939  | 1.5238116  |             |                |
| DM01193P3 | 0.01287046 | 1.1294822  | -1.1193495 | -1.167916  | LOC412804   | XM_396257.2    |
| DM12659P1 | 0.01287164 | -1.0507493 | -1.0860134 | 1.0289526  |             |                |
| DM01784P1 | 0.01289164 | -1.2183892 | -1.3435237 | -1.3591278 | DSEC\GM177  | XM_002043825.1 |
| DM05098P2 | 0.01290002 | 1.2632816  | 1.6307259  | -1.6451429 |             |                |
| DM14761P1 | 0.01291189 | 1.1785939  | 1.6098081  | 1.8494972  |             |                |
| DM09528P1 | 0.01291769 | 1.1492356  | 1.0717238  | -1.2500614 |             |                |
| DM01234P1 | 0.01291814 | -1.1712204 | -1.9723666 | 1.5838358  |             |                |
| DM07691P1 | 0.01295199 | -1.0927694 | -1.1421341 | -1.9404283 |             |                |
| DM10559P1 | 0.01297345 | 1.1682637  | 1.2806518  | -1.0876418 |             |                |
| DM12322P1 | 0.01298487 | 1.130105   | 1.2154317  | 1.1812179  |             |                |
| DM05876P2 | 0.01300124 | -1.2860918 | 1.319325   | -1.499396  |             |                |
| DM06451P1 | 0.01300398 | -1.0906982 | 1.0110015  | -1.191525  | EIF3G       | NM_001140944.1 |
| DM05219P1 | 0.01300641 | 1.0705894  | 1.0202     | -1.1911504 |             |                |
| DM14290P2 | 0.0130091  | 1.0575356  | -1.2422537 | -1.1938787 |             |                |
| DM04391P3 | 0.0130273  | -1.1122847 | -1.042037  | -1.4142315 | DWIL\GK230  | XM_002074683.1 |
| DM06303P2 | 0.01304344 | 1.1390332  | 1.2531122  | 1.1303586  |             |                |
| DM00363P1 | 0.01311038 | -1.0562183 | -1.0880023 | -1.3244519 | AAEL_AAELOC | XM_001654055.1 |
| DM13528P1 | 0.01313228 | 1.1192491  | 1.1412238  | 1.8064663  |             |                |
| DM07331P2 | 0.01315262 | 1.136217   | 1.4636571  | 1.5462177  |             |                |
| DM05097P1 | 0.01319736 | -1.1140258 | -1.021003  | -1.505781  |             |                |
| DM05604P1 | 0.01319866 | -1.1972075 | -1.0101244 | -1.2394794 |             |                |
| DM02499P3 | 0.01322372 | 1.012617   | -1.0036919 | 1.148016   | MLC-C       | XM_623501.2    |
| DM13364P1 | 0.01322536 | -1.051994  | -1.0190248 | 1.3585833  |             |                |
| DM09944P3 | 0.01323407 | -1.2234085 | -1.2013438 | -1.0313095 |             |                |
| DM04373P1 | 0.01323989 | -1.1306959 | 1.0768968  | -1.2776707 |             |                |
| DM01698P2 | 0.01324334 | -1.0514336 | -1.2301646 | 1.0208719  | DPER\GL221  | XM_002017197.1 |
| DM03903P1 | 0.01326134 | 1.2319661  | -1.0317581 | 1.4692556  |             |                |
| DM14739P3 | 0.01326531 | -1.1807038 | -1.194011  | -1.2077776 |             |                |
| DM10753P2 | 0.01327878 | 1.2281384  | 1.0611296  | 1.4066066  |             |                |
| DM03581P2 | 0.01330451 | -1.1779488 | -1.1612296 | -1.245668  |             |                |
| DM06163P1 | 0.01330825 | -1.0134579 | 1.1354887  | 1.4794339  |             |                |
| DM08050P1 | 0.01332341 | -1.0816002 | 1.0406461  | 1.2544639  |             |                |
| DM00678P1 | 0.01333536 | 1.4971466  | 1.2599636  | 1.0992043  | ATG1        | NM_001169962.1 |
| DM15130P1 | 0.01337585 | -1.0706227 | 1.0965506  | 1.2163422  |             |                |
| DM13944P2 | 0.01337829 | 1.4792662  | 1.8795817  | 1.0119877  |             |                |
| DM11159P1 | 0.01338232 | 1.5532469  | 1.67931    | 1.5858722  |             |                |

|           |            |            |            |            |            |                |
|-----------|------------|------------|------------|------------|------------|----------------|
| DM05992P2 | 0.01338247 | -1.0386304 | -1.0680925 | 1.3413842  | TNNC       | XM_001862803.1 |
| DM01679P2 | 0.0134041  | -1.1907785 | -1.0530667 | 1.192698   | LOC1002140 | XM_002156884.1 |
| DM08854P1 | 0.01340805 | -1.2286701 | -1.0449289 | 1.1665868  |            |                |
| DM05803P4 | 0.01341907 | -1.2213107 | -1.4292586 | 1.3654678  |            |                |
| DM05031P2 | 0.01342151 | -1.2378458 | -1.0186236 | 1.3054092  |            |                |
| DM05329P3 | 0.01344867 | -1.1016699 | 1.0173569  | -1.424715  | PSMD8      | XM_523879.2    |
| DM12197P3 | 0.01347561 | -1.0169978 | -1.1777716 | -1.3447176 |            |                |
| DM04113P3 | 0.01347945 | 1.0106487  | -1.126926  | -1.3702676 | RNF10      | NM_001096369.1 |
| DM03494P1 | 0.01348341 | 1.0736971  | 1.3592676  | 1.4180539  | LOC592108  | XM_791648.1    |
| DM08414P4 | 0.01349157 | 2.136255   | 2.50917    | 1.7215772  |            |                |
| DM01444P1 | 0.01351531 | 1.0581778  | 1.1254919  | -1.11238   |            |                |
| DM11292P1 | 0.01352422 | -1.3065425 | -1.1924536 | -1.6207585 |            |                |
| DM04663P1 | 0.01352602 | -1.0321716 | -1.0991789 | -1.1994262 | LOC1001222 | XM_001605781.1 |
| DM13774P3 | 0.01354403 | -1.094626  | 1.089986   | 1.2748677  |            |                |
| DM10692P1 | 0.01360844 | -1.0052247 | 1.0657908  | 1.157434   |            |                |
| DM10398P4 | 0.0136346  | -1.2089343 | -1.011137  | -1.2441626 |            |                |
| DM01565P1 | 0.01364732 | -1.188638  | 1.090854   | 1.4540694  |            |                |
| DM05490P2 | 0.01364777 | 1.4103577  | 1.2600092  | 1.1473192  |            |                |
| DM07760P4 | 0.01365099 | -1.2162143 | -1.0063281 | -1.32874   |            |                |
| DM00107P2 | 0.01365142 | -1.0737505 | 1.0207134  | -1.3521649 | LOC1002317 | XM_002198962.1 |
| DM06300P1 | 0.0136811  | -1.2311178 | -1.3046789 | -1.1535981 |            |                |
| DM09808P2 | 0.01370136 | 1.115418   | 1.1307265  | -1.1761266 |            |                |
| DM11395P3 | 0.01370242 | -1.052206  | -1.0105056 | 1.3892163  |            |                |
| DM11881P1 | 0.01370571 | -1.0716214 | -1.0709743 | -1.4962004 | LOC1001140 | XM_001601345.1 |
| DM05436P1 | 0.01372373 | 1.1403202  | -1.0824027 | 1.1706707  |            |                |
| DM11588P2 | 0.01373861 | 1.1823235  | 1.3835372  | 1.806923   |            |                |
| DM12824P2 | 0.01376388 | -1.0204074 | 1.1010298  | -1.3562804 |            |                |
| DM02128P2 | 0.01376413 | -1.1091988 | 1.0042186  | 1.2075608  | DMOJ\GI227 | XM_002000064.1 |
| DM13073P1 | 0.01385737 | 1.0981041  | 1.0277581  | -1.1800824 | LOC1000113 | XM_001363024.1 |
| DM07234P2 | 0.0138632  | -1.7958418 | 1.0221554  | -4.353531  |            |                |
| DM08376P1 | 0.01386661 | 1.9377842  | 2.0013897  | 1.1208341  |            |                |
| DM03747P3 | 0.01390675 | -1.3310403 | -1.175181  | -1.7861822 |            |                |
| DM13595P2 | 0.01390701 | 1.2579017  | 1.6771908  | -1.1964675 |            |                |
| DM13325P4 | 0.01392552 | -1.167015  | 1.0146133  | -1.4707118 |            |                |
| DM00228P1 | 0.01392757 | 1.2905736  | 1.2962824  | 1.2265086  | DPSE\GA171 | XM_001382185.1 |
| DM06504P3 | 0.01394762 | -1.3523716 | 1.3565557  | 1.6377853  | RN28S1     | NR_003287.2    |
| DM12308P3 | 0.01396774 | -1.001208  | 1.2535425  | 1.4328337  | PTPRA      | NM_001127950.1 |
| DM04379P2 | 0.0139741  | 1.6929059  | 2.8977053  | -2.2026927 |            |                |
| DM07969P3 | 0.01398439 | 1.2677484  | 1.2140223  | 1.1496853  |            |                |
| DM09183P3 | 0.01398678 | -1.1004514 | -1.0242233 | 1.2807927  |            |                |
| DM07721P2 | 0.01400033 | -1.1563399 | 1.1769783  | -2.5973115 |            |                |
| DM00210P2 | 0.01400137 | -1.1872594 | -1.286414  | -1.3895907 | LOC660183  | XM_966437.2    |
| DM11099P3 | 0.01400656 | 1.0268161  | -1.2331583 | -1.5233331 | LOC1002320 | XM_002186808.1 |
| DM03658P3 | 0.01401032 | 1.1331798  | -1.7561301 | 2.1364791  | CG4998     | NM_001043144.1 |
| DM09694P3 | 0.01403406 | -1.4077497 | -1.2558556 | -1.8189831 |            |                |
| DM11118P3 | 0.01404893 | -1.0193746 | -1.3611695 | -1.2918713 |            |                |
| DM02971P1 | 0.01406039 | 1.1350237  | 1.0885507  | 1.5663296  | DERE\GG120 | XM_001981390.1 |
| DM03339P1 | 0.01407507 | -1.0584517 | 1.0306685  | -1.1727334 | DANA\GF197 | XM_001967664.1 |
| DM06306P1 | 0.01407722 | 1.0891253  | 1.0891873  | 1.378937   |            |                |
| DM13587P1 | 0.0140978  | -1.2312415 | -1.1897534 | 1.1595488  |            |                |

|           |            |            |            |            |             |                |
|-----------|------------|------------|------------|------------|-------------|----------------|
| DM03743P4 | 0.01411999 | 1.0017595  | -1.0636165 | -1.3304929 | AAEL_AAEL01 | XM_001663335.1 |
| DM13286P2 | 0.01414867 | -1.6422757 | -1.0931748 | -1.4072844 | DYAK\GE104  | XM_002098498.1 |
| DM01065P4 | 0.01418969 | 1.2385576  | 1.3048695  | 1.353406   | LOC1000739  | XM_001505570.1 |
| DM10817P4 | 0.01419028 | 1.1450189  | 1.0982423  | -1.1108583 |             |                |
| DM06937P4 | 0.01421399 | 1.1194093  | 1.1055925  | -1.2875125 |             |                |
| DM00266P3 | 0.01423706 | -1.1354874 | -1.013967  | -1.3619604 | AURORA-A    | XM_002179914.1 |
| DM07135P2 | 0.01424375 | 1.0221413  | 1.0890846  | -1.2252609 |             |                |
| DM01272P2 | 0.01429708 | -1.0378442 | 1.0938216  | -1.3851163 | LOC412472   | XM_395929.2    |
| DM02042P2 | 0.01437581 | -1.4782381 | -1.4154274 | -3.5417778 | PHATRDRAFT  | XM_002183085.1 |
| DM04605P4 | 0.01438909 | 1.2214925  | 1.2144358  | -1.5001072 |             |                |
| DM06946P1 | 0.01439972 | 1.3349148  | 1.5619868  | -1.0211693 |             |                |
| DM02305P3 | 0.01442345 | -1.3569072 | -1.6201236 | -1.452641  | LOC660193   | XM_966447.2    |
| DM05108P1 | 0.01444625 | 1.020018   | 1.2434124  | -1.1932065 |             |                |
| DM11008P1 | 0.01444872 | -1.02058   | 1.0758823  | 1.1473379  |             |                |
| DM04485P1 | 0.01447719 | 1.0448978  | -1.061042  | -1.2223295 |             |                |
| DM11701P2 | 0.01450517 | -1.0143607 | -1.1402358 | -1.7285821 |             |                |
| DM03133P4 | 0.01451459 | 1.0934178  | 1.1054894  | -1.1277312 | AAEL_AAEL0C | XM_001659770.1 |
| DM02403P3 | 0.01452078 | 1.2226393  | 1.1916872  | -1.4513137 | LOC1001594  | XM_001946398.1 |
| DM01104P1 | 0.01453577 | -1.0865897 | 1.0627818  | 1.4474046  |             |                |
| DM05319P4 | 0.01454229 | 1.2213255  | 1.1633173  | -1.0182247 |             |                |
| DM05262P1 | 0.01455583 | -1.5990483 | -1.9193037 | -2.0296683 |             |                |
| DM10715P2 | 0.01457329 | 1.1160799  | 1.2484847  | 1.2526641  |             |                |
| DM06531P3 | 0.01457443 | -1.0811642 | -1.0261313 | -1.2916762 | LOC1001621  | XM_001948045.1 |
| DM06751P2 | 0.01463141 | 1.1296295  | -1.4609692 | -1.3840278 |             |                |
| DM06122P3 | 0.01465086 | -1.0563959 | 1.0183179  | 1.3203294  |             |                |
| DM03948P2 | 0.01465713 | 1.1813146  | -1.0826799 | -1.2148308 |             |                |
| DM11850P1 | 0.01465922 | -1.0800998 | 1.098412   | -1.4051566 |             |                |
| DM08660P1 | 0.01466924 | -1.1677514 | -1.2278516 | -1.6380394 |             |                |
| DM03805P1 | 0.01468667 | 1.274898   | 1.0397689  | -1.3249494 |             |                |
| DM08397P3 | 0.01470697 | 1.013709   | 1.3362018  | 1.4362009  |             |                |
| DM05070P4 | 0.01471373 | 1.1583784  | 1.1569427  | 1.3804455  |             |                |
| DM01735P4 | 0.01471374 | -1.0627013 | -1.0592663 | -1.3189368 | TUBA        | XM_001663357.1 |
| DM04529P3 | 0.01471641 | -1.2626777 | -1.0693811 | -1.616945  |             |                |
| DM04856P1 | 0.01475259 | 1.2455202  | 1.0142899  | -1.0260719 | LOC1000216  | XM_001368459.1 |
| DM10644P3 | 0.01477241 | 1.2264425  | -1.0966258 | -1.3518971 |             |                |
| DM02136P1 | 0.01479023 | 1.2155612  | 1.2812098  | 1.0276321  | DMOJ\GI116  | XM_002002599.1 |
| DM09656P1 | 0.01484058 | 1.1935169  | 1.2466056  | 1.1936487  |             |                |
| DM13498P3 | 0.01484584 | -1.2446936 | -1.1725997 | 1.0270442  | SI:CH211-71 | NM_001128395.1 |
| DM10335P1 | 0.01486621 | -1.1456288 | 1.0073574  | 1.2053683  |             |                |
| DM07470P3 | 0.01488612 | -1.5251175 | 1.22186    | -1.0932177 |             |                |
| DM14073P1 | 0.01489521 | 1.0854589  | 1.025332   | 1.274645   |             |                |
| DM09515P1 | 0.01492647 | 1.0293216  | 1.1702106  | -1.3213011 |             |                |
| DM06569P2 | 0.01493675 | 1.5103327  | 1.9135151  | 1.3458955  |             |                |
| DM05861P1 | 0.01495806 | -1.0759407 | 1.1362307  | 1.2074403  | LOC1001836  | XM_002124668.1 |
| DM11215P1 | 0.01496061 | -1.0886403 | -1.2029514 | -1.548806  |             |                |
| DM04550P1 | 0.01496403 | 1.0626056  | -1.0778519 | -1.3564175 |             |                |
| DM02032P3 | 0.01496505 | 1.2447524  | 1.4388586  | -1.4854163 | AKR1A1      | NM_001006539.1 |
| DM00853P3 | 0.0149795  | -1.143602  | -1.4122534 | 1.0258806  | DERE\GG147  | XM_001971085.1 |
| DM09967P3 | 0.01501001 | 1.0901926  | -1.5943466 | -1.0535975 |             |                |
| DM13231P2 | 0.01505392 | -1.142305  | -1.0989753 | -1.2570235 |             |                |

|           |            |            |            |            |             |                |
|-----------|------------|------------|------------|------------|-------------|----------------|
| DM02254P1 | 0.0150819  | -1.0790536 | -1.1986139 | -1.3196298 | TUB2        | NM_001043499.1 |
| DM02313P3 | 0.01509191 | 1.0006328  | 1.0706593  | 1.2909361  | DWIL\GK174  | XM_002062268.1 |
| DM06338P2 | 0.01513279 | 2.161681   | 2.57112    | 1.9719477  | LOC410828   | XM_394304.3    |
| DM07911P1 | 0.01514107 | -1.1783712 | 1.1045601  | 1.3921231  |             |                |
| DM01558P3 | 0.01515576 | 1.0288993  | -1.0862535 | -1.3047302 | PHB         | XM_001662336.1 |
| DM02650P2 | 0.01518087 | 1.1389405  | 1.3605194  | -1.4336095 | DWIL\GK170  | XM_002061732.1 |
| DM09572P1 | 0.01520776 | -1.2270415 | -1.1177921 | -1.4964482 |             |                |
| DM01417P3 | 0.01521678 | -1.1601007 | -1.161196  | -1.3805947 | PSMD1       | NM_001092985.1 |
| DM11984P1 | 0.01522013 | 1.020588   | 1.0269294  | -1.1981794 |             |                |
| DM00484P3 | 0.01522734 | 1.0188352  | 1.002856   | -1.2248179 | RARS        | XM_001842243.1 |
| DM12637P1 | 0.01529674 | 1.0176485  | -1.118116  | -1.14903   |             |                |
| DM09896P1 | 0.0153139  | -1.0302844 | 1.0584111  | -1.1084756 |             |                |
| DM03153P1 | 0.01531752 | -1.1525677 | -1.2671634 | 1.186144   | LOC1002269  | XM_002198503.1 |
| DM09500P3 | 0.01532741 | 1.2597106  | 1.0865288  | -1.2800717 |             |                |
| DM12275P1 | 0.01534618 | 1.2722025  | 1.1594702  | 1.3399509  |             |                |
| DM07432P4 | 0.01539145 | -1.1783092 | -1.0571829 | -1.2910812 | LOC758878   | XM_001182773.1 |
| DM00458P4 | 0.0153967  | 1.3659482  | 1.8161393  | 1.0091763  | LOC657023   | XM_963512.2    |
| DM13920P1 | 0.01540302 | 1.7407634  | 1.5674994  | 1.5866435  | TRIADDRAFT  | XM_002117580.1 |
| DM08081P2 | 0.01541153 | 1.2710438  | -1.2289252 | 2.5710351  |             |                |
| DM09487P3 | 0.0154119  | 1.0929906  | -1.0307741 | -1.3641821 | DWIL\GK208  | XM_002061292.1 |
| DM06110P2 | 0.0154296  | -1.687652  | -1.998061  | -2.3990133 |             |                |
| DM10848P4 | 0.0154367  | 1.0512199  | 1.0828887  | -1.3115695 |             |                |
| DM13716P2 | 0.01548627 | -1.3162048 | -1.3364532 | 1.3369781  |             |                |
| DM03140P1 | 0.01551065 | 1.0281324  | 1.0232326  | -1.4202943 |             |                |
| DM00067P4 | 0.01552187 | -1.0849148 | -1.1353701 | -1.2923225 | DANA\GF219  | XM_001964843.1 |
| DM05500P1 | 0.01553963 | 1.0205964  | 1.1998382  | 1.0619588  |             |                |
| DM06398P2 | 0.01555838 | -1.073959  | -1.204398  | 1.1929412  |             |                |
| DM00954P3 | 0.01556245 | 1.0398861  | -1.0375896 | -1.1635498 | TRIADDRAFT  | XM_002109665.1 |
| DM05384P3 | 0.01569828 | 2.409607   | 2.255615   | 1.4728061  |             |                |
| DM11681P4 | 0.01572491 | -1.0014509 | 1.0754534  | -1.1974677 |             |                |
| DM11392P3 | 0.01572718 | 1.0950276  | 1.1594962  | 1.3455632  |             |                |
| DM11166P3 | 0.01574519 | 1.1510416  | 1.17282    | 1.2150936  |             |                |
| DM00440P1 | 0.01575208 | -1.0618993 | -1.2423605 | -1.4525274 | AGAP_AGAP0  | XM_318461.2    |
| DM11960P3 | 0.01576714 | 1.0987903  | 1.0331405  | -1.2082921 | LOC1002212  | XM_002192179.1 |
| DM06992P4 | 0.01578902 | -1.0920994 | -1.3570905 | -1.8415576 |             |                |
| DM10616P2 | 0.01580865 | -1.0436907 | 1.0046055  | -1.1937449 |             |                |
| DM00630P4 | 0.01582885 | 1.0303057  | -1.0909699 | -1.2252094 | LOC657452   | XM_963912.1    |
| DM00144P1 | 0.01584183 | 1.0044119  | 1.0048397  | -1.2937466 | DVIR\GJ1812 | XM_002057389.1 |
| DM05943P3 | 0.01584249 | 1.4025936  | 1.463012   | 1.3519559  | LOC1002077  | XM_002162013.1 |
| DM03343P2 | 0.0158451  | 1.1075681  | 1.0107976  | -1.1417518 |             |                |
| DM04417P1 | 0.01586525 | -1.1023357 | -1.0959018 | -1.3577254 | CG8258      | NM_136574.2    |
| DM02648P3 | 0.01586714 | -1.1201217 | 1.1525832  | -1.0628713 | LOC664305   | XM_970312.2    |
| DM01103P3 | 0.01587386 | -1.0434291 | -1.1012639 | -1.3148203 | PSAT1       | NM_001046804.1 |
| DM08449P1 | 0.01588013 | 1.2810209  | 1.1799134  | 1.7016345  |             |                |
| DM03620P2 | 0.0158874  | 1.0049987  | 1.0188396  | -1.791366  |             |                |
| DM07118P4 | 0.01589868 | -1.1636461 | -1.0207013 | -1.5072314 |             |                |
| DM02864P3 | 0.01592752 | -1.0570741 | 1.051158   | -1.2495701 |             |                |
| DM08402P2 | 0.01592898 | -1.18519   | 1.0634154  | 1.4640732  |             |                |
| DM12224P1 | 0.01594176 | 1.0348699  | -1.0317566 | -1.1588954 |             |                |
| DM01645P3 | 0.01595417 | 1.1277095  | 1.0405169  | -1.0822825 | LOC1002316  | XM_002197170.1 |

|           |            |            |            |            |             |                |
|-----------|------------|------------|------------|------------|-------------|----------------|
| DM01045P1 | 0.0159559  | -1.099069  | -1.0460185 | -1.3389273 | DMOJ\GI219C | XM_002003541.1 |
| DM08530P1 | 0.01596277 | 1.6451032  | 1.4807919  | 1.3418671  |             |                |
| DM05102P3 | 0.01597224 | -1.0252918 | 1.2670623  | 1.0793759  | CSNK1E      | NM_212747.1    |
| DM07636P2 | 0.01598219 | -1.0151966 | -1.4340706 | -1.916322  |             |                |
| DM00119P1 | 0.01599357 | -1.0257993 | -1.0010339 | 1.280988   | LOC1000644! | XM_001495360.2 |
| DM12973P3 | 0.01602197 | 1.3525583  | 1.5772264  | 1.6316973  |             |                |
| DM03089P2 | 0.01602386 | 1.0271404  | 1.0902468  | -1.2934154 | THAPSDRAFT  | XM_002296344.1 |
| DM02394P1 | 0.01604632 | -1.102318  | -1.0479139 | -1.5210781 | LOC1000227! | XM_001368952.1 |
| DM04283P1 | 0.01609088 | 1.1948699  | 1.2302263  | 1.4297398  |             |                |
| DM10054P1 | 0.01611088 | 1.1342514  | 1.2474213  | 1.0490086  |             |                |
| DM00672P3 | 0.01616612 | -1.2334865 | -1.3642089 | -1.3048162 | UBA1        | XM_001492947.2 |
| DM00255P2 | 0.01619457 | 1.935225   | 2.3357773  | 1.8619783  | DGRI\GH126  | XM_001991443.1 |
| DM03364P2 | 0.01622845 | 1.2542976  | 1.2190627  | 1.0573643  |             |                |
| DM01639P2 | 0.01624304 | -1.0776914 | -1.2769204 | -1.2374568 | DWIL\GK127  | XM_002074169.1 |
| DM11230P2 | 0.0162493  | 1.1585304  | 1.4063157  | 1.1013291  |             |                |
| DM07428P3 | 0.01628551 | 1.4822522  | 2.0229354  | 2.026289   | TTHERM_000  | XM_001014892.2 |
| DM13778P1 | 0.01632964 | -1.1218346 | -1.1497289 | 1.3421564  |             |                |
| DM08214P1 | 0.01633411 | 1.1787843  | -1.0343236 | 1.1534247  |             |                |
| DM01477P1 | 0.01636436 | 1.1831658  | 1.2655597  | 1.3261194  |             |                |
| DM12720P4 | 0.01643156 | 1.165999   | 1.2813197  | 1.1869868  |             |                |
| DM07677P1 | 0.01646703 | 1.1430123  | 1.4394431  | 1.0523049  |             |                |
| DM06589P2 | 0.01646949 | -1.1361152 | -1.1996835 | -1.3451747 | HM13        | XM_393360.3    |
| DM02393P2 | 0.01647893 | 1.0119383  | -1.1095194 | -1.3133527 | HSP70       | XM_001900162.1 |
| DM11309P3 | 0.01657932 | -1.0628972 | -1.0255191 | -1.4913422 |             |                |
| DM10708P3 | 0.01658017 | -1.0468358 | -1.180787  | -1.4122633 | MYH         | XM_001659142.1 |
| DM06552P1 | 0.01658215 | 1.0440048  | 1.1606691  | 1.7039429  |             |                |
| DM12231P2 | 0.01658337 | 1.4014697  | 1.5518818  | 1.4096305  |             |                |
| DM10256P3 | 0.01659775 | 1.1792846  | -1.2335958 | -1.538126  |             |                |
| DM03007P2 | 0.01662214 | -1.3681129 | -1.3363041 | -1.222365  | LOC663663   | XM_969699.1    |
| DM14481P3 | 0.01662429 | 1.5587398  | 2.0612867  | 2.3420947  |             |                |
| DM12349P1 | 0.01663044 | -1.0709527 | -1.0793104 | -1.2811614 |             |                |
| DM04019P1 | 0.01667424 | 1.0308928  | 1.1134428  | -1.0696491 |             |                |
| DM01205P1 | 0.01668185 | -1.1902183 | -1.1939166 | -1.3267968 |             |                |
| DM11710P3 | 0.01672988 | -1.2547547 | -1.1027259 | -1.7753773 |             |                |
| DM05586P3 | 0.01673514 | -1.0380919 | -1.0671637 | -1.2261366 |             |                |
| DM09086P2 | 0.016748   | 1.44132    | 1.3055868  | 1.3086648  |             |                |
| DM11255P4 | 0.01678782 | -1.1198171 | 1.0099293  | -1.3132753 |             |                |
| DM12779P2 | 0.0168115  | 1.154703   | 1.3462163  | 1.1840744  |             |                |
| DM10740P2 | 0.01682166 | 1.0235885  | 1.0824397  | -1.2765031 |             |                |
| DM00312P2 | 0.01684608 | 1.016029   | -1.0357171 | -1.2398379 | LOC1001140C | XM_001601345.1 |
| DM05406P3 | 0.01684897 | -1.154256  | -1.180173  | -1.2304292 |             |                |
| DM05429P1 | 0.01685854 | -1.1209975 | -1.0706294 | -1.8503892 |             |                |
| DM05425P2 | 0.01686497 | 1.1841272  | 1.5037477  | 1.1823392  |             |                |
| DM14288P2 | 0.01689627 | -1.0364854 | -1.9463923 | -1.0278897 |             |                |
| DM06195P1 | 0.01695627 | 1.09066    | 1.1554254  | 1.4188008  | AGAP_AGAP0  | XM_315029.3    |
| DM14260P3 | 0.01696605 | -1.0797231 | 1.2169051  | 1.5363959  |             |                |
| DM08064P1 | 0.01697659 | 1.7017752  | 1.9746213  | 1.0441914  | DMOJ\GI145C | XM_002001889.1 |
| DM12093P2 | 0.0169869  | -1.5977962 | -1.6721191 | -1.9641107 |             |                |
| DM00382P2 | 0.0169914  | -1.0407443 | -1.069408  | -1.1852032 | FZD7        | NM_001144091.1 |
| DM10979P1 | 0.0169944  | 1.0242785  | 1.034069   | -1.454594  |             |                |

|           |            |            |            |            |             |                |
|-----------|------------|------------|------------|------------|-------------|----------------|
| DM12721P3 | 0.01701117 | 1.0355674  | -1.2151506 | -1.9575338 |             |                |
| DM05855P3 | 0.01706417 | 1.1748656  | 1.0671655  | -1.0718046 | EIF5        | NM_001160627.1 |
| DM05002P1 | 0.01707568 | -1.1125386 | 1.1207092  | 1.1551024  |             |                |
| DM06102P4 | 0.01709496 | -1.2347738 | -1.1950798 | -1.3955173 |             |                |
| DM06424P3 | 0.01711509 | -1.3492596 | -1.5475726 | -1.395485  |             |                |
| DM04979P3 | 0.01713632 | 1.0177253  | -1.1122478 | -1.167896  |             |                |
| DM11157P3 | 0.01715109 | 1.1672217  | 1.2652777  | -1.0194244 |             |                |
| DM03523P2 | 0.01717757 | -1.0582634 | -1.0523118 | -1.3384446 | POLR2G      | NM_026329.2    |
| DM00596P1 | 0.01724898 | 1.0371526  | -1.4321318 | 1.0933834  | LOC1000310! | XM_001380375.1 |
| DM09549P2 | 0.017256   | 1.104991   | -1.0753717 | 1.623097   |             |                |
| DM11789P3 | 0.0172709  | 1.1800838  | 1.0774622  | -1.0487437 |             |                |
| DM03408P3 | 0.01728221 | -1.479154  | -1.4012309 | 1.178811   | PGM1        | NM_001038693.1 |
| DM05088P1 | 0.01731494 | 1.0925066  | 1.065956   | -1.2753584 |             |                |
| DM12716P1 | 0.01733834 | 1.2476841  | 1.0256304  | 1.6755642  |             |                |
| DM03209P3 | 0.01736917 | -1.2245141 | -1.2239015 | -1.3378884 |             |                |
| DM13662P2 | 0.01736979 | -1.2303307 | -1.3711939 | -1.1184876 |             |                |
| DM09820P3 | 0.01737811 | -1.1737777 | 1.0769984  | -1.2754859 |             |                |
| DM01867P2 | 0.01738235 | 1.1069522  | -1.5033102 | 1.5297971  | ISCW_ISCWC  | XM_002406553.1 |
| DM07311P1 | 0.01738243 | -4.344554  | -2.597872  | -3.7094262 |             |                |
| DM13915P3 | 0.01741231 | -1.2117246 | -1.0289692 | 1.2543089  |             |                |
| DM05697P4 | 0.0174381  | -1.6541431 | 1.0262221  | -1.4270976 |             |                |
| DM11580P1 | 0.01744841 | -1.0105783 | 1.0819057  | 1.8469728  |             |                |
| DM06218P2 | 0.01749192 | -1.0757512 | -1.1157942 | 1.1144093  |             |                |
| DM10032P1 | 0.01749936 | 1.0316563  | 1.070864   | 1.2029399  |             |                |
| DM06372P1 | 0.01753658 | 1.324761   | 1.6190232  | 1.476945   |             |                |
| DM11446P1 | 0.01754481 | -1.3280879 | 1.0827153  | -3.7509837 |             |                |
| DM14812P1 | 0.0175557  | -1.0164827 | 1.2020624  | 1.6152093  |             |                |
| DM05394P1 | 0.01758277 | -1.334113  | -1.2010506 | -1.1355226 |             |                |
| DM02299P2 | 0.01758662 | -1.1460869 | -1.1042986 | -1.574591  | DMOJ\GI193  | XM_002004789.1 |
| DM02924P1 | 0.01758665 | -1.1745405 | 1.219139   | 1.2954774  | LOC236598   | NR_003279.1    |
| DM08772P1 | 0.01760086 | 1.2261734  | 1.627673   | 1.2289481  |             |                |
| DM00643P1 | 0.01767158 | 1.03889    | -1.1461799 | -1.113393  | LOC693032   | NM_001044001.1 |
| DM13456P4 | 0.01767357 | 1.0606432  | 1.038025   | 1.2440218  |             |                |
| DM08626P1 | 0.01769204 | 1.0736176  | -1.0911947 | 1.6115836  |             |                |
| DM05556P1 | 0.01772099 | -1.1489139 | 1.1325357  | 1.9317316  |             |                |
| DM02095P3 | 0.01773858 | -1.3212022 | -1.0551322 | -1.5117053 | NURF55      | XM_001602871.1 |
| DM06820P2 | 0.01774728 | 1.0335526  | -1.0587428 | 1.3541641  |             |                |
| DM06608P1 | 0.01775801 | -1.1130745 | -1.0082259 | -1.2485099 |             |                |
| DM08427P1 | 0.0177652  | 1.1257964  | 1.346548   | 1.2315361  |             |                |
| DM04975P3 | 0.01777758 | -1.0249076 | 1.0369394  | -1.1957426 | LOC411194   | XM_394668.3    |
| DM01102P3 | 0.01779529 | 1.1593332  | 1.1770216  | -1.0093279 | OSBPL11     | NM_022776.4    |
| DM00735P1 | 0.01780445 | -1.0651935 | -1.1380897 | -1.2535077 | AGAP_AGAP0  | XM_317142.4    |
| DM07394P1 | 0.01783365 | 1.035238   | 1.1766529  | 1.3664378  |             |                |
| DM14465P1 | 0.01784776 | 1.0637485  | 1.3489002  | 1.3976761  |             |                |
| DM12386P4 | 0.01785838 | -1.0229614 | -1.1219877 | -1.1984136 |             |                |
| DM04682P4 | 0.01786538 | 1.1986091  | 1.2098783  | 1.0646123  |             |                |
| DM10877P3 | 0.01789905 | -1.0245035 | 1.2717794  | 1.3393861  |             |                |
| DM09473P2 | 0.01790095 | 1.342512   | 1.1908878  | 1.0781646  |             |                |
| DM11525P1 | 0.01790485 | 1.1542394  | 1.3114324  | 1.3826263  |             |                |
| DM14247P2 | 0.01793763 | -1.108678  | -1.155275  | 1.3835425  |             |                |

|           |            |            |            |            |                           |
|-----------|------------|------------|------------|------------|---------------------------|
| DM13597P3 | 0.01794382 | -1.3963147 | -1.2849145 | 1.1702571  |                           |
| DM12213P2 | 0.01796014 | -1.0062082 | 1.0801176  | -1.393511  |                           |
| DM07845P1 | 0.01796155 | 1.4652886  | 2.317573   | 1.1020429  |                           |
| DM10771P1 | 0.01801212 | -1.035538  | -1.2509565 | 1.1736157  |                           |
| DM12799P1 | 0.01802183 | -1.0965073 | -1.2082769 | -1.3044908 |                           |
| DM04102P1 | 0.01803454 | 1.2017666  | 1.1335657  | 1.5832894  |                           |
| DM06454P4 | 0.0180371  | -1.0474467 | 1.0278058  | -1.2488428 |                           |
| DM04232P3 | 0.018053   | 1.0206366  | -1.0335625 | -1.3751253 |                           |
| DM02855P3 | 0.01807368 | 1.6643854  | 1.5807999  | 1.5201879  |                           |
| DM03919P4 | 0.01807535 | 1.0288675  | -1.019044  | -1.2063743 | LOC664499 XM_970500.1     |
| DM09759P3 | 0.01807716 | 1.0608478  | 1.0782304  | -1.342602  |                           |
| DM02452P3 | 0.01808402 | 1.0765821  | 1.0249817  | 1.6334357  | DWIL\GK250\XM_002071558.1 |
| DM03459P3 | 0.01812339 | -1.0267738 | 1.0065829  | -1.3761688 |                           |
| DM12682P1 | 0.01813184 | 1.045628   | 1.0793633  | 1.2309105  |                           |
| DM11024P1 | 0.01817406 | -1.0692649 | -1.0133728 | -1.2150565 |                           |
| DM04662P1 | 0.0181898  | -1.0010715 | -1.1478174 | -1.371105  |                           |
| DM03267P2 | 0.01829079 | 1.4975098  | 2.4099472  | 1.8870519  |                           |
| DM03825P3 | 0.01830648 | -1.1747142 | -1.3359861 | -1.3835526 |                           |
| DM00757P1 | 0.0183084  | -1.1926141 | -1.1271313 | -1.3226559 | LOC1001630:XM_001946462.1 |
| DM04364P3 | 0.01833421 | 1.3585325  | 1.4659961  | 1.0437926  |                           |
| DM15074P1 | 0.01833504 | 1.0836976  | 1.0971644  | 1.2091843  |                           |
| DM08122P1 | 0.01840315 | -1.5993633 | -1.1136928 | 1.4803735  |                           |
| DM00412P2 | 0.01847191 | -1.097373  | 1.0601821  | -1.3976966 | NOP5 XM_395309.3          |
| DM12348P1 | 0.01851223 | 1.0389389  | -1.0384482 | -1.2239044 |                           |
| DM06546P3 | 0.01853922 | 1.1001408  | -1.0334259 | 1.3301709  |                           |
| DM11049P4 | 0.01855025 | -1.4601109 | -1.3100088 | 1.0552672  |                           |
| DM10201P4 | 0.01855601 | 1.0056092  | 1.1291203  | -1.2582657 |                           |
| DM02970P1 | 0.0186491  | -1.2841597 | -1.100528  | 1.1799192  |                           |
| DM05484P1 | 0.01865969 | -1.2624277 | 1.1476622  | -1.3215758 |                           |
| DM00199P3 | 0.01866261 | -1.2011268 | -1.2328572 | -1.4111315 | LOC1002300\XM_002197778.1 |
| DM03449P3 | 0.01869059 | -1.006418  | -1.0814235 | -1.4189757 |                           |
| DM03438P1 | 0.01871121 | 1.1003675  | 1.0186516  | -1.3000695 |                           |
| DM02994P2 | 0.01872951 | 1.0903537  | -1.1317009 | -1.1719444 | LOC1002268:XM_002199926.1 |
| DM10432P2 | 0.0187466  | 1.1605971  | 1.2268106  | 1.1831532  |                           |
| DM10121P1 | 0.01874985 | -1.0062426 | -1.0607432 | -1.3040305 |                           |
| DM00632P1 | 0.01875348 | 1.1907103  | -1.01996   | 1.57989    | AAEL_AAEL\XM_001659393.1  |
| DM09238P3 | 0.01881306 | 1.3581206  | -1.5222354 | -2.371074  |                           |
| DM05520P4 | 0.01882051 | -1.0655959 | 1.2436922  | -1.1677506 |                           |
| DM07473P1 | 0.01884318 | 1.1485027  | 1.1894333  | 1.1167533  |                           |
| DM06967P3 | 0.018845   | -1.7229688 | -1.6345782 | -1.4421883 |                           |
| DM09248P2 | 0.01884723 | 2.3979344  | 1.9677426  | 1.9004558  |                           |
| DM08428P1 | 0.01885384 | -2.6280868 | -2.0726895 | -1.410503  |                           |
| DM03130P1 | 0.01888107 | 1.1302367  | -1.4288248 | 1.2761697  | LOC656744 XM_963250.2     |
| DM00113P3 | 0.018888   | 1.1476349  | -1.0114793 | -1.2941588 | PCCB NM_001133271.1       |
| DM10108P1 | 0.01889472 | 1.2566599  | 1.9252518  | -1.2837408 |                           |
| DM00739P3 | 0.01891105 | -1.0933691 | -1.0990353 | -1.4575396 | LOC1001639:XM_001952079.1 |
| DM04518P3 | 0.01894904 | 1.0326076  | -1.1721989 | 1.6234877  |                           |
| DM14668P2 | 0.01896843 | -1.1239774 | 1.0140258  | -1.5454254 |                           |
| DM00386P3 | 0.01897591 | 1.1015906  | -1.2661308 | -1.2734511 | DMOJ\GI146\XM_002001833.1 |
| DM09777P3 | 0.01899206 | -1.100315  | -1.1056461 | -1.398157  |                           |

|           |            |            |            |            |                             |
|-----------|------------|------------|------------|------------|-----------------------------|
| DM02222P3 | 0.01900034 | -1.2651522 | -1.2835668 | -1.828497  | DMOJ\GI203{XM_002005212.1   |
| DM03787P3 | 0.01904315 | 1.3785889  | 1.1236495  | 1.0545381  | AAEL_AAEL01XM_001663998.1   |
| DM09518P4 | 0.0190662  | -1.3018057 | -1.265285  | 1.0381359  |                             |
| DM03406P3 | 0.01911085 | -1.022206  | 1.0068005  | -1.2169653 | ESD NM_001984.1             |
| DM07744P4 | 0.01912847 | 1.1834491  | 1.3634299  | 1.5838183  |                             |
| DM12011P2 | 0.01918172 | -1.1161991 | -1.1064538 | -1.4506395 | RAB27A NM_001092394.1       |
| DM12633P1 | 0.01921534 | 1.1297239  | 1.0082345  | 1.3500116  |                             |
| DM00425P3 | 0.01922839 | 1.0630852  | -1.1862265 | -1.2006266 | DVIR\GJ2424 XM_002051925.1  |
| DM01937P1 | 0.01923538 | -1.1919581 | -1.2337172 | -1.3057673 | CPIPJ_CPIJOC XM_001851126.1 |
| DM09674P3 | 0.01926883 | -1.0381007 | 1.3847818  | 1.5111357  |                             |
| DM04428P4 | 0.01927778 | -1.1225464 | -1.1665713 | -1.2568175 | DPER\GL2107 XM_002023180.1  |
| DM01209P1 | 0.01929679 | -1.0807419 | -1.2053939 | -1.2503467 | TRIADDRAFT XM_002109158.1   |
| DM01469P1 | 0.01929722 | -1.27174   | -1.1352929 | -1.5491825 | LOC1001946{NM_001139749.1   |
| DM06340P1 | 0.01932599 | 1.0545237  | -1.0127581 | -1.2481076 |                             |
| DM14052P3 | 0.01935987 | -1.2457248 | 1.1673092  | 1.0032246  |                             |
| DM12448P2 | 0.01936866 | -1.08929   | 1.2325773  | -1.1407841 |                             |
| DM05651P1 | 0.01939116 | 1.2477669  | 1.2170194  | -1.1393354 |                             |
| DM12406P2 | 0.01939848 | 1.2870153  | 1.1840105  | 1.0077711  |                             |
| DM00567P1 | 0.01940344 | 1.0201018  | 1.0251163  | -1.2915962 | DVIR\GJ1812 XM_002057389.1  |
| DM15294P1 | 0.01948467 | -1.1393833 | -1.0165315 | 1.1367531  |                             |
| DM02477P1 | 0.01948541 | -1.0232846 | -1.1491171 | -1.3912969 | LOC1001590{XM_001951172.1   |
| DM03526P2 | 0.01952574 | -1.5417601 | -1.0063795 | 1.0225233  | LOC726674 XM_001122396.1    |
| DM04480P2 | 0.01952781 | 1.1762372  | 1.5073471  | 1.1429662  | AGAP_AGAP0 XM_001688796.1   |
| DM03925P2 | 0.01959569 | -1.4404836 | -1.5559535 | -1.4033225 | SEC61 XM_001649279.1        |
| DM04578P1 | 0.01961558 | -1.0418057 | -1.0840745 | -1.2604196 |                             |
| DM14934P3 | 0.01961665 | 1.1770052  | 1.1546993  | 1.2943     |                             |
| DM12666P2 | 0.01963572 | 1.3529195  | 1.3374104  | 1.2341555  |                             |
| DM08755P3 | 0.01964159 | 4.14854    | 6.902769   | 2.4690807  | HYR10 XM_001384426.1        |
| DM07084P1 | 0.01966634 | -1.6167897 | -1.3568249 | -1.2378887 |                             |
| DM07046P1 | 0.01967692 | -1.1246693 | -1.0552773 | 1.4034466  |                             |
| DM00936P2 | 0.01969603 | -1.191565  | -1.1061666 | -1.2473595 | ACYPI006352 NM_001162188.1  |
| DM07675P2 | 0.01972756 | -1.2505832 | 1.4809307  | 1.1617844  |                             |
| DM13754P1 | 0.01972906 | 1.2320712  | 1.1621408  | 1.1555533  |                             |
| DM04317P3 | 0.01974163 | 1.8145329  | 1.9759663  | 1.800649   |                             |
| DM09595P3 | 0.01977068 | -1.1018265 | -1.1408079 | -1.3041229 |                             |
| DM06214P2 | 0.01981636 | -1.4573909 | -1.0749723 | 1.0840633  |                             |
| DM09729P3 | 0.01982063 | -1.1011804 | -1.06231   | -1.453624  |                             |
| DM10999P3 | 0.01982142 | -1.1496214 | 1.0409529  | -1.2845374 |                             |
| DM05062P2 | 0.01988398 | -1.1325519 | -1.4127383 | -1.0055519 |                             |
| DM09068P1 | 0.01988845 | 1.016179   | 1.0214053  | 1.3775971  |                             |
| DM09581P3 | 0.01988976 | 1.3888878  | 1.6630349  | 1.1162057  |                             |
| DM14113P1 | 0.01989394 | -1.3214111 | -1.169923  | 1.1514091  |                             |
| DM06764P2 | 0.01991798 | 1.1594839  | -1.6517491 | 1.8288943  |                             |
| DM06024P2 | 0.0199413  | -1.0343663 | -1.1348231 | -1.2159461 | LOC1002306{XR_053896.1      |
| DM08343P2 | 0.01997552 | -1.0893347 | -1.200762  | 1.1678865  |                             |
| DM03474P1 | 0.02001443 | -1.15675   | -1.1519835 | -1.2787095 | LOC1000288` XM_001371892.1  |
| DM04821P3 | 0.02005977 | -1.0200653 | -1.0094461 | -1.2414098 | ISCW_ISCWC XM_002405702.1   |
| DM12680P2 | 0.02007256 | -1.8960501 | -2.735455  | -1.4693738 | CPIPJ_CPIJOC XM_001846375.1 |
| DM04084P1 | 0.02007353 | -1.0972707 | -1.1020353 | -1.3329313 | DPSE\GA174{ XM_001361857.2  |
| DM02075P1 | 0.02008689 | -1.0917295 | -1.1167171 | 1.1322721  | DYAK\GE202` XM_002094252.1  |



|           |            |            |            |            |                            |
|-----------|------------|------------|------------|------------|----------------------------|
| DM03718P3 | 0.02008858 | 2.0364957  | 2.5667477  | 1.7012405  |                            |
| DM14367P1 | 0.02012749 | -1.1940062 | 1.0972975  | -1.38204   |                            |
| DM12154P2 | 0.02015181 | 1.7206241  | 1.6088789  | 1.4845924  |                            |
| DM01290P1 | 0.02016738 | -1.1488993 | 1.2443715  | 1.2040983  | DGRI\GH238\XM_001994285.1  |
| DM06553P3 | 0.02018262 | 1.0380889  | 1.1213732  | 1.2682173  |                            |
| DM10646P3 | 0.02019702 | -1.39368   | 1.0628399  | -1.4741865 |                            |
| DM11028P4 | 0.02026204 | -1.0539689 | 1.1065907  | -1.1836803 |                            |
| DM12848P1 | 0.02029426 | 1.083424   | 1.1818364  | 1.2803547  |                            |
| DM03157P2 | 0.02031313 | 1.1854888  | 1.0309368  | 1.2427396  | DWIL\GK250\XM_002071549.1  |
| DM02949P3 | 0.02033212 | -1.0382113 | -1.1882203 | -1.3305354 | SNRNP70 XM_001661556.1     |
| DM12815P1 | 0.02034611 | 1.0202469  | -1.0649718 | -1.2640289 |                            |
| DM03989P4 | 0.02035476 | -1.1697341 | -1.3825119 | 1.821101   | LOC1002129\XM_002160660.1  |
| DM10901P1 | 0.02036142 | -1.1812333 | -1.2356675 | 1.2666049  |                            |
| DM07941P2 | 0.02037215 | -1.11342   | 1.2084901  | 1.6504282  |                            |
| DM13297P1 | 0.02037359 | 1.0685304  | 1.2300564  | 1.2196532  |                            |
| DM02624P2 | 0.0203919  | 1.2624158  | 1.0369478  | -1.0171767 | LOC1001597\XM_001952088.1  |
| DM13349P1 | 0.02039465 | -1.130092  | -1.1669127 | -1.0473671 |                            |
| DM09530P1 | 0.02043364 | 1.0356481  | -1.0195456 | -1.3033578 |                            |
| DM04528P1 | 0.02045785 | -1.1122446 | 1.0641196  | 1.2331257  |                            |
| DM12623P2 | 0.02048508 | -1.1350298 | -1.0551921 | -1.3632417 |                            |
| DM01014P3 | 0.02049764 | 1.1589488  | -1.0211133 | 1.7359767  | MIOX NM_017584.5           |
| DM02312P3 | 0.020505   | -1.089292  | 1.03013    | 1.2295467  | MONBRDRAF\XM_001744661.1   |
| DM02696P3 | 0.02052519 | -1.1659029 | -1.1629685 | -1.5070635 | FKBP13 XM_002091496.1      |
| DM12588P1 | 0.02054649 | -1.2342614 | -1.1087883 | -1.3294796 |                            |
| DM01395P3 | 0.0205626  | -1.097592  | -1.008679  | -1.2596569 | DVIR\GJ1256\XM_002046305.1 |
| DM00223P2 | 0.0206045  | 1.268308   | 1.2077945  | -2.2586994 | LOC576659 XM_776942.2      |
| DM10748P1 | 0.02066986 | 1.1690646  | 1.1727973  | -1.1724756 |                            |
| DM12934P1 | 0.02068142 | -1.2373062 | 1.0219085  | 1.2241889  |                            |
| DM03327P4 | 0.02081481 | -1.0220464 | 1.0210453  | -1.311579  |                            |
| DM08586P1 | 0.02084115 | -1.5053744 | -1.0395149 | -4.2015634 |                            |
| DM02156P3 | 0.02085947 | -1.0068171 | 1.2950537  | 2.210228   |                            |
| DM13142P3 | 0.0208657  | -2.4763274 | -2.1744177 | -1.4612199 |                            |
| DM08462P1 | 0.02089158 | -1.0975764 | 1.2938833  | 1.3532673  |                            |
| DM13984P3 | 0.02090123 | 1.1542982  | 1.2517865  | -1.1366429 |                            |
| DM08979P1 | 0.02090461 | 1.1277901  | 1.0135741  | -1.1419654 |                            |
| DM09623P2 | 0.02096548 | -1.0997007 | 1.0167397  | 1.2289965  |                            |
| DM13817P3 | 0.02098616 | -1.7385484 | -1.8268017 | -2.6298778 |                            |
| DM00679P3 | 0.02101057 | -1.0055068 | -1.0527035 | 1.3357853  | FTZ-F1 XM_001652964.1      |
| DM10177P2 | 0.02101364 | -1.1673985 | -1.0227741 | 1.2379286  |                            |
| DM14511P3 | 0.02102455 | 1.0355438  | 1.1292754  | -1.33471   |                            |
| DM05930P2 | 0.02106334 | 1.2505598  | 1.2216833  | -1.0268558 | LRP2 XM_422014.2           |
| DM09278P2 | 0.02107083 | 1.462477   | 1.6568605  | 1.01061    |                            |
| DM10070P3 | 0.02107638 | -1.2700117 | -1.3252331 | -1.0663413 |                            |
| DM05766P2 | 0.02109817 | 1.3380154  | 1.474494   | 1.1062785  |                            |
| DM06719P2 | 0.02111931 | 1.1362367  | 1.1351982  | 1.2646086  |                            |
| DM10127P3 | 0.02112353 | 1.2144586  | 1.3127755  | 1.3767239  |                            |
| DM03251P2 | 0.02114669 | -1.0910679 | 1.1313937  | -1.5253103 | LACBIDRAFT_XM_001882813.1  |
| DM07703P1 | 0.02120071 | -1.1110127 | 1.1871651  | 1.0922548  |                            |
| DM06852P2 | 0.02120086 | -1.1252601 | -2.2007775 | -1.5002877 |                            |
| DM02276P3 | 0.0212166  | -1.9613484 | -1.2267673 | -2.6780233 |                            |

|           |            |            |            |            |             |                |
|-----------|------------|------------|------------|------------|-------------|----------------|
| DM12034P1 | 0.02127135 | 1.622403   | 1.2128332  | 1.2879049  |             |                |
| DM08207P4 | 0.02129539 | 1.0317472  | 1.0484701  | 1.4286716  |             |                |
| DM02153P3 | 0.02129594 | 1.3516989  | 1.7475892  | 1.1856186  |             |                |
| DM02997P1 | 0.02131803 | -1.1709429 | 1.059092   | 1.1391174  | RPL37A      | XM_001849540.1 |
| DM10761P1 | 0.02133314 | -1.021433  | -1.0460529 | -1.1599492 |             |                |
| DM00953P1 | 0.02134373 | -1.1583284 | -1.2237133 | -1.2039627 | CYB5R3      | XM_780154.2    |
| DM01747P3 | 0.02136506 | -1.714678  | -1.3856367 | -1.020257  | DSIM\GD130  | XM_002083949.1 |
| DM08459P2 | 0.02142762 | 2.2743878  | 2.1060038  | 1.7025812  |             |                |
| DM11254P1 | 0.02148601 | 1.2738229  | 1.2610738  | 1.0233403  |             |                |
| DM12278P1 | 0.02150013 | 1.2818161  | 1.0165448  | 1.5772874  |             |                |
| DM00185P2 | 0.02153733 | 1.0574285  | -1.1406106 | -1.0951419 | LOC1001666: | XM_001944414.1 |
| DM09489P4 | 0.02154009 | -1.1311916 | 1.1682118  | 1.2445168  |             |                |
| DM03384P3 | 0.02154919 | -1.040063  | 1.0198162  | -1.27853   |             |                |
| DM10654P3 | 0.02156042 | 1.0270898  | 1.2030056  | -1.2189091 |             |                |
| DM13013P4 | 0.02158067 | -1.1616073 | -1.0948323 | 1.178688   |             |                |
| DM03049P3 | 0.02159548 | 1.4991689  | 1.8243673  | -1.2646822 | DPSE\GA112  | XM_001359815.2 |
| DM01916P2 | 0.02162893 | -1.2629403 | -1.4265522 | -1.5254017 | DSEC\GM113  | XM_002041744.1 |
| DM11236P2 | 0.02163292 | 1.1782159  | 1.0127448  | 1.9384344  | DSEC\GM105  | XM_002038503.1 |
| DM03893P2 | 0.02169192 | 1.1156589  | -1.156327  | -1.3273662 |             |                |
| DM10656P4 | 0.02170864 | 1.2587924  | 1.239476   | 1.1345748  |             |                |
| DM05447P1 | 0.02171395 | 1.1736412  | 1.1616604  | 1.0776097  |             |                |
| DM08711P2 | 0.02174306 | 1.1385666  | -1.1182296 | -1.15658   |             |                |
| DM00273P2 | 0.02174803 | -1.1246848 | -1.0479634 | -1.2833465 | ISCW_ISCWC  | XM_002407701.1 |
| DM07967P1 | 0.02175286 | -1.0684717 | 1.1115031  | 1.2861236  |             |                |
| DM12398P3 | 0.02176395 | 1.5079204  | 1.3816835  | 1.695412   |             |                |
| DM00493P1 | 0.02176486 | 1.2290847  | 1.1929598  | 1.0079722  | GALT        | XM_001865129.1 |
| DM03912P4 | 0.02177995 | 1.0654131  | -1.0007105 | -1.303567  |             |                |
| DM08698P1 | 0.02181722 | 1.4688164  | -1.1554856 | 1.5783658  |             |                |
| DM11154P3 | 0.02182892 | 1.076125   | 1.1761371  | 1.0213342  |             |                |
| DM15344P1 | 0.0218494  | -1.3382802 | -1.1771662 | -1.7361114 |             |                |
| DM02932P1 | 0.02192228 | 1.3729751  | 1.4831376  | 1.325898   |             |                |
| DM06981P1 | 0.0219301  | 1.0305914  | -1.5568941 | 1.2349416  |             |                |
| DM00194P2 | 0.02195034 | -1.0272036 | 1.019245   | -1.2889118 | LOC1001657: | XM_001949066.1 |
| DM09224P1 | 0.02198451 | -1.0069922 | 1.0954221  | 1.2465438  |             |                |
| DM00443P1 | 0.02199307 | -1.0929765 | -1.3190509 | 1.0928179  | AMT         | NM_001006021.1 |
| DM01809P3 | 0.02200096 | 1.6020232  | 1.6849159  | 1.3435984  |             |                |
| DM03606P2 | 0.02200315 | -1.1134242 | -1.2141569 | 1.1830848  | DANA\GF244: | XM_001965262.1 |
| DM13422P1 | 0.02206032 | 1.4364978  | 1.5195563  | -1.4723381 |             |                |
| DM13271P1 | 0.02206131 | 1.0011971  | 1.0025097  | -1.2007776 |             |                |
| DM02707P2 | 0.02207503 | 1.2914499  | 1.3517307  | 1.0990628  | CTH         | NM_145953.2    |
| DM01515P2 | 0.02209191 | 1.0493058  | 1.061157   | -1.1898783 |             |                |
| DM06288P2 | 0.02210562 | -1.053086  | -1.3555005 | 1.3170227  | EDA         | NM_001115065.1 |
| DM14537P2 | 0.02211404 | 1.036661   | 1.1995761  | 1.2187682  |             |                |
| DM14591P2 | 0.02213814 | -1.3178427 | -1.6347954 | 1.2737212  |             |                |
| DM11882P2 | 0.02216589 | -1.3222644 | -1.4740132 | -1.4057603 |             |                |
| DM06096P3 | 0.02217184 | -1.2024763 | 1.0181798  | 1.4877589  |             |                |
| DM01016P1 | 0.02220596 | -1.0486561 | -1.2277662 | -1.1995989 | DWIL\GK127: | XM_002074164.1 |
| DM09756P1 | 0.02221114 | -1.0894163 | 1.024079   | 1.4189422  |             |                |
| DM03294P1 | 0.0222477  | -1.0430439 | 1.0013657  | -1.3151183 |             |                |
| DM05471P1 | 0.02226852 | -1.0628256 | 1.026557   | 1.3978227  |             |                |

|           |            |            |            |            |                            |
|-----------|------------|------------|------------|------------|----------------------------|
| DM06544P1 | 0.02227005 | -1.1897717 | -1.095473  | -1.2553388 |                            |
| DM02336P1 | 0.02229294 | 1.067991   | -1.2529306 | -1.235742  | LOC1001152\XM_001599016.1  |
| DM10649P1 | 0.02231441 | 1.3319566  | 1.4280401  | 1.5619738  |                            |
| DM08955P2 | 0.02231474 | -1.1261172 | -1.0615749 | 1.1822183  |                            |
| DM08845P1 | 0.02232807 | 2.0006847  | 2.8756096  | -1.3757827 |                            |
| DM03152P3 | 0.02234417 | -1.022365  | -1.0662097 | -1.4252641 |                            |
| DM01200P3 | 0.02236315 | -1.2965814 | -1.2318152 | -1.1053745 |                            |
| DM12225P1 | 0.02237151 | -1.0717019 | -1.240641  | -1.3004777 |                            |
| DM06631P1 | 0.02242525 | 1.0173264  | 1.1817374  | 1.2832732  |                            |
| DM04007P1 | 0.02246464 | -1.1993115 | -1.1602196 | 1.3161372  |                            |
| DM01070P1 | 0.02249015 | 1.0863477  | 1.0329603  | 1.4325699  | DMO\GI147\XM_002010252.1   |
| DM08105P2 | 0.02259934 | 1.1757191  | 1.3696913  | 2.1353204  |                            |
| DM10397P1 | 0.02261467 | 1.2171243  | 1.2407658  | 1.8748783  |                            |
| DM08658P1 | 0.02261868 | -1.0852386 | -1.0245836 | -1.2232376 |                            |
| DM11643P4 | 0.02264176 | 1.163849   | 1.2916758  | -2.0508504 |                            |
| DM12171P1 | 0.02264553 | 1.2722982  | 1.4115055  | 1.3963362  |                            |
| DM10157P3 | 0.02270432 | -1.450878  | -1.1752278 | 1.1550174  |                            |
| DM09635P2 | 0.02271978 | 1.0545084  | 1.175083   | 1.1626748  |                            |
| DM02093P1 | 0.02272657 | 1.0569171  | -1.387197  | 1.7447958  | GASP NM_141354.2           |
| DM01106P3 | 0.02273251 | 1.079032   | -1.0461668 | -1.2252306 | LOC1000529\XM_001496831.2  |
| DM07032P4 | 0.02275109 | -2.4633315 | -1.284977  | -4.490636  |                            |
| DM01015P1 | 0.02283996 | 1.2266921  | 1.1083246  | 1.4061974  |                            |
| DM03684P1 | 0.02287342 | -1.0396047 | -1.1820083 | -1.3663862 |                            |
| DM09924P2 | 0.02287382 | 1.053777   | 1.0294571  | -1.1990497 |                            |
| DM01801P2 | 0.02290005 | -1.0848598 | -1.001478  | -1.2898496 | FIB XM_624375.1            |
| DM13800P2 | 0.0230143  | -1.3637941 | -1.034872  | 1.2354484  |                            |
| DM09050P2 | 0.02302188 | 1.0757626  | 1.169226   | 1.0185174  |                            |
| DM03291P3 | 0.02303661 | -1.1655531 | 1.0096424  | -1.2415966 | DVIR\GJ1438 XM_002058358.1 |
| DM03984P2 | 0.02304933 | 1.0296347  | 1.1112648  | -1.5756294 |                            |
| DM09249P4 | 0.02308158 | 1.5796621  | -1.130127  | -1.5241787 |                            |
| DM01837P2 | 0.02309082 | -1.0190496 | -1.1483032 | -1.2954739 | LOC1001872\XM_002129065.1  |
| DM07449P2 | 0.0231157  | 1.3262663  | 1.2968845  | 1.0908931  |                            |
| DM11433P2 | 0.02315745 | 1.1010492  | -1.4719663 | -1.043339  |                            |
| DM11611P2 | 0.02320061 | 1.1228063  | 1.0955666  | -1.2004895 |                            |
| DM09620P1 | 0.02320412 | -1.1024284 | -1.1203719 | -1.3310235 |                            |
| DM09526P2 | 0.02320732 | -1.0855329 | 1.1414702  | 1.05475    |                            |
| DM04026P1 | 0.0232105  | -1.555203  | -1.6278442 | 1.012352   |                            |
| DM04848P1 | 0.02322741 | 1.0250207  | 1.0738477  | -1.2756754 |                            |
| DM15087P4 | 0.02325202 | -1.2431952 | -1.5052496 | 1.4102023  |                            |
| DM05011P1 | 0.02328174 | -1.0478439 | 1.012499   | -1.2987435 |                            |
| DM08173P2 | 0.02334616 | -1.1983951 | -1.1660748 | -1.1584957 |                            |
| DM11072P1 | 0.02336996 | -1.0750145 | -1.0625405 | -1.3782573 |                            |
| DM05211P1 | 0.02337435 | -1.019071  | 1.1175106  | 1.1855031  |                            |
| DM10939P3 | 0.02338264 | 1.1696888  | 1.2574298  | 1.6451756  |                            |
| DM01843P4 | 0.02340941 | -1.1702104 | -1.0226555 | 1.2690437  |                            |
| DM07349P1 | 0.02349501 | -1.3093361 | -1.0592145 | -1.470423  |                            |
| DM12182P2 | 0.02349561 | 1.2240938  | 2.26712    | -1.8321263 |                            |
| DM04843P3 | 0.02351156 | -1.1504503 | -1.1159164 | 1.0957404  | AGAP_AGAP0 XM_001688445.1  |
| DM13077P3 | 0.02351164 | -1.1755046 | -1.248229  | -1.2680807 |                            |
| DM14730P2 | 0.02352453 | -1.1283439 | -1.188265  | 1.6777372  |                            |

|           |            |            |            |            |            |                |
|-----------|------------|------------|------------|------------|------------|----------------|
| DM00276P3 | 0.02353308 | 1.0496309  | -1.0331565 | -1.2055041 | PPP2R1A    | NM_204074.1    |
| DM06366P3 | 0.02353347 | 1.1023662  | -1.423788  | 1.7821864  | DERE\GG106 | XM_001978992.1 |
| DM12853P3 | 0.02353629 | 1.1306531  | 1.0739347  | -1.1817756 |            |                |
| DM05153P1 | 0.02356148 | -1.457211  | -1.1256194 | -1.2975554 | LOC1001773 | XM_002127797.1 |
| DM00667P1 | 0.02360494 | -1.1110153 | -1.0540369 | -1.3731896 |            |                |
| DM06958P2 | 0.0236221  | -1.5105731 | -1.1543819 | -2.2650065 |            |                |
| DM10233P1 | 0.02365423 | -1.7791686 | -1.7822915 | -1.640692  |            |                |
| DM12192P2 | 0.02368185 | -1.1232857 | -1.0443666 | -1.2133236 |            |                |
| DM00013P1 | 0.0237115  | -1.094347  | -1.214782  | -1.2861655 | FLR        | XM_624085.2    |
| DM12766P2 | 0.02371317 | 1.4642723  | 2.4658966  | 1.3908844  |            |                |
| DM00865P3 | 0.02373196 | 1.0430592  | 1.1021947  | -1.3550901 | LOC656332  | XM_962871.1    |
| DM02296P3 | 0.0237622  | 1.38747    | 1.4262513  | 1.1509786  | WIPI2      | XM_856866.1    |
| DM08463P2 | 0.02378508 | -2.5197918 | -1.8354074 | -1.3546474 | FG01049.1  | XM_381225.1    |
| DM09496P1 | 0.02378576 | 1.1174092  | 1.2387758  | 1.425047   |            |                |
| DM01497P2 | 0.02379726 | 1.0422997  | 1.0685062  | 1.3808792  |            |                |
| DM02584P1 | 0.02380464 | -1.4021579 | -1.2129798 | -2.140852  |            |                |
| DM06634P3 | 0.02381485 | 1.1322093  | 1.3504394  | -1.5643977 | LOC1001461 | XM_001916360.1 |
| DM00450P3 | 0.0238165  | 1.1843247  | -1.0644323 | 1.2139022  | DSEC\GM235 | XM_002032381.1 |
| DM05673P3 | 0.02386253 | 1.0595437  | -1.4957833 | -1.3680202 |            |                |
| DM00576P2 | 0.02386494 | -1.2163029 | -1.1242632 | -1.399922  | DPSE\GA188 | XM_001358673.2 |
| DM00681P4 | 0.02386584 | 1.1615932  | -1.0251096 | -1.1649959 | DMOJ\GI195 | XM_002004513.1 |
| DM07342P3 | 0.0238663  | 1.2534889  | 1.2485099  | 1.4148651  |            |                |
| DM03218P3 | 0.02394667 | -1.1636181 | -1.2587024 | -1.3023223 |            |                |
| DM08656P1 | 0.02397994 | 1.0183942  | -1.4631004 | -1.6061436 |            |                |
| DM02455P1 | 0.02406578 | -1.3537843 | -1.5354526 | -1.2115136 |            |                |
| DM06908P1 | 0.02410508 | 1.0464079  | 1.0895482  | 1.4394492  |            |                |
| DM06371P3 | 0.02411592 | 1.1524241  | -1.0693755 | 1.9199845  | CYP306A1   | NM_001112751.1 |
| DM04009P3 | 0.02414257 | -1.1741898 | -1.2742872 | -1.3493087 | LOC725146  | XM_001120311.1 |
| DM11042P1 | 0.02414635 | 1.0774953  | 1.1718878  | 1.4661702  |            |                |
| DM10446P1 | 0.02415793 | 1.1647385  | -1.0391437 | -1.0539404 |            |                |
| DM05781P1 | 0.02420118 | -1.0279852 | -1.2480454 | 1.3221072  |            |                |
| DM06313P2 | 0.02422539 | -1.6504456 | -1.5371333 | -1.2034435 |            |                |
| DM00622P4 | 0.02428085 | -1.0096331 | -1.1390998 | -1.1736017 | EIF4G2     | NM_001004992.1 |
| DM02391P3 | 0.02429637 | 1.1194222  | 1.0040451  | 1.5319792  | DMOJ\GI170 | XM_002001782.1 |
| DM01476P2 | 0.02431467 | -1.1527387 | -2.5085604 | -3.0431411 | DSIM\GD133 | XM_002083392.1 |
| DM03572P1 | 0.02431492 | 1.0615168  | 1.0312928  | -1.3241593 |            |                |
| DM07954P1 | 0.02431592 | -1.6428694 | 1.2126399  | 1.1963761  |            |                |
| DM06167P1 | 0.02432988 | -1.1173915 | -1.0413668 | 1.3544598  |            |                |
| DM11077P1 | 0.02435994 | 1.1558962  | -1.2811936 | -1.4507371 |            |                |
| DM14295P3 | 0.02436791 | 1.1374722  | 1.005586   | 1.4559001  |            |                |
| DM12215P3 | 0.02445684 | -1.0901155 | -1.1408073 | -1.210009  |            |                |
| DM01462P3 | 0.02447412 | -1.1764859 | -1.2547451 | -1.3004061 | NFXL1      | NM_133921.2    |
| DM12577P2 | 0.02448784 | 1.0290719  | -1.0179623 | 1.2951106  | ISCW_ISCWC | XM_002404024.1 |
| DM03238P1 | 0.02449589 | 1.0558698  | 1.0498844  | 1.2573754  | AGAP_AGAP0 | XM_320237.3    |
| DM08373P1 | 0.02450559 | 1.239885   | 1.8160323  | 2.7809708  |            |                |
| DM01435P2 | 0.0245269  | -1.1129534 | -1.1388993 | -1.3456944 | LOC592289  | XM_791820.2    |
| DM05820P1 | 0.02454691 | 1.1016557  | -1.0412132 | -1.1069369 | LOC1001651 | XM_001944264.1 |
| DM11990P3 | 0.02455397 | -1.1022347 | -1.1954124 | -1.4895115 |            |                |
| DM03905P2 | 0.02463239 | -1.0777458 | 1.1910591  | -1.2888796 |            |                |
| DM11591P2 | 0.02464191 | 1.0279438  | -1.0726302 | -1.3287082 |            |                |

|           |            |            |            |            |             |                |
|-----------|------------|------------|------------|------------|-------------|----------------|
| DM07217P3 | 0.02465374 | -1.4687871 | -1.5830979 | 1.4104764  | BACOIKO003  | XM_001913203.1 |
| DM07366P3 | 0.02466312 | -1.2529358 | -1.1577328 | 1.108125   |             |                |
| DM03877P2 | 0.02469325 | -1.166595  | 1.0676928  | -1.3870366 |             |                |
| DM15147P3 | 0.0247409  | -1.2510014 | -1.0442334 | 1.0615735  |             |                |
| DM06980P3 | 0.02476961 | -1.1445447 | 1.0271325  | -1.4401436 |             |                |
| DM00828P2 | 0.02480301 | -1.0595949 | 1.1127579  | -1.5815903 | TRAF        | XM_001846638.1 |
| DM05960P1 | 0.02480514 | -1.1805611 | -1.3550375 | 1.3901877  | COL4A2      | NM_001846.2    |
| DM15199P1 | 0.02482515 | -1.1302361 | -1.1169944 | 1.1374466  |             |                |
| DM09458P3 | 0.02489187 | -1.0248446 | 1.1049075  | -1.2512933 |             |                |
| DM02234P1 | 0.02489579 | -1.1084925 | -1.189962  | -1.2605302 | TSR         | NM_001126170.2 |
| DM02934P2 | 0.02492874 | 1.1763026  | 1.2912319  | 1.4223802  |             |                |
| DM02860P2 | 0.02493231 | -1.3042587 | -1.2211186 | -1.2675883 | SPASE22-23  | XM_001122788.1 |
| DM06801P2 | 0.02499453 | 2.1853237  | 2.7884817  | 2.4418104  |             |                |
| DM12667P3 | 0.02502316 | -1.1253837 | 1.0122975  | -1.1992526 |             |                |
| DM00697P2 | 0.02504706 | 1.176691   | -1.1270542 | -1.2654749 | AAEL_AAELOC | XM_001652204.1 |
| DM12745P2 | 0.02505237 | -1.156706  | -1.0443368 | -1.6741168 |             |                |
| DM07497P2 | 0.025063   | 1.0705849  | -1.0350924 | 1.7354507  |             |                |
| DM05647P2 | 0.02509817 | 1.2465112  | 1.2908754  | 1.7196455  |             |                |
| DM06910P3 | 0.02511    | 1.552278   | -1.5490217 | 1.450722   |             |                |
| DM10472P3 | 0.0251168  | 1.2263882  | 1.4989074  | 1.4923266  |             |                |
| DM11565P3 | 0.02511948 | 1.0012529  | 1.1661518  | -1.1679053 |             |                |
| DM08238P1 | 0.02513362 | -1.380034  | -1.1088909 | -2.237401  |             |                |
| DM15021P1 | 0.02519048 | -1.0417548 | -1.0443021 | 1.6262567  |             |                |
| DM14756P1 | 0.02519462 | -1.038635  | -1.0702988 | 1.4037646  |             |                |
| DM09766P4 | 0.02519815 | 1.3774252  | 1.1468388  | -1.1835841 |             |                |
| DM11266P3 | 0.02532147 | 1.2214857  | 1.0456614  | -1.1061927 |             |                |
| DM04059P2 | 0.02535386 | -2.2781842 | -2.4239702 | -1.1423079 | POPTRDRAFT  | XM_002335211.1 |
| DM14248P4 | 0.02537915 | -1.2407526 | -1.047383  | 1.3538837  |             |                |
| DM08505P1 | 0.02539365 | 1.1262252  | 1.0100045  | 1.5352331  |             |                |
| DM06708P3 | 0.02551082 | -1.283045  | -1.4382709 | -1.0882038 |             |                |
| DM04369P3 | 0.02554628 | -1.2077645 | 1.3055531  | 1.9994166  | LOC448984   | NR_002170.3    |
| DM00769P3 | 0.02556521 | 1.0025479  | 1.0384685  | -1.2747276 | LOC1000233  | XM_001369640.1 |
| DM07390P3 | 0.02560435 | -1.0415419 | -1.7113502 | 1.6684207  |             |                |
| DM03782P4 | 0.02560971 | -1.005839  | -1.2667383 | 1.5165635  |             |                |
| DM07130P3 | 0.0256288  | 3.581927   | 6.0726366  | 1.1399301  |             |                |
| DM04438P3 | 0.02563204 | -1.3745954 | -1.466434  | -1.9120626 | PICST_68241 | XM_001386193.1 |
| DM01789P4 | 0.02563596 | 1.050197   | -1.0436528 | 1.1982698  | DERE\GG123  | XM_001982035.1 |
| DM07688P3 | 0.02564173 | 2.2721486  | 2.553191   | 3.1632528  |             |                |
| DM10824P3 | 0.0256753  | 1.0937765  | -1.1920023 | -1.1697603 |             |                |
| DM05032P1 | 0.02571236 | 1.2263393  | 1.0915623  | 1.5528103  |             |                |
| DM13880P3 | 0.02573025 | -1.1800259 | 1.0319413  | -1.3711466 |             |                |
| DM00539P2 | 0.02575317 | -1.0076897 | 1.0004421  | -1.1978865 | LOC612762   | XM_850950.1    |
| DM10714P3 | 0.02575416 | -1.1721038 | -1.2034849 | -1.2427356 |             |                |
| DM07211P1 | 0.02577554 | 1.4635683  | -1.0187504 | -1.0219272 |             |                |
| DM07972P1 | 0.02578764 | -1.2040383 | -1.0780853 | 1.0341463  |             |                |
| DM08869P2 | 0.0257973  | -1.2296523 | -1.142632  | 1.1596848  |             |                |
| DM07019P1 | 0.02581548 | -1.1261406 | -1.4470283 | -1.6997459 | IMPDH1      | NM_001017283.2 |
| DM13478P3 | 0.02583326 | -1.6090437 | 1.072323   | -1.0305334 |             |                |
| DM05545P2 | 0.02588585 | -1.242211  | -1.0616561 | -1.5841334 |             |                |
| DM03187P1 | 0.02593403 | -1.0097299 | 1.0431659  | -1.1649748 | GSTO1       | XM_624498.2    |

|           |            |            |            |            |                            |
|-----------|------------|------------|------------|------------|----------------------------|
| DM09064P1 | 0.0259691  | -1.0030725 | 1.0132632  | -1.1694491 |                            |
| DM13362P2 | 0.02597085 | 1.1781507  | 1.4170719  | -1.1507549 |                            |
| DM05888P1 | 0.02603153 | -1.1281575 | -1.2134088 | -1.4856431 | DGRI\GH110:XM_001988165.1  |
| DM06680P1 | 0.02603191 | 1.1417322  | -1.0564572 | -1.2680848 |                            |
| DM00279P3 | 0.02604919 | -1.0876279 | -1.1486666 | -1.2288952 | OS03G08106 NM_001058200.1  |
| DM08678P1 | 0.02606744 | -1.359338  | -1.411133  | -1.3590261 |                            |
| DM07868P3 | 0.02611033 | -1.2728755 | -1.3907987 | -1.3373109 |                            |
| DM04929P1 | 0.02611818 | 1.0205007  | -1.1466821 | -1.0794541 |                            |
| DM02729P2 | 0.02614446 | 1.0702926  | -1.2473854 | -1.1724019 | DGRI\GH124:XM_001990947.1  |
| DM00585P2 | 0.02614566 | 1.139981   | 1.0080773  | -1.1957332 | TALDO XM_001855849.1       |
| DM04499P1 | 0.02618898 | 1.0454978  | 1.2824374  | 1.2011464  |                            |
| DM01043P1 | 0.0262054  | 1.1066815  | 1.0138894  | -1.1675117 | MATS XM_393046.3           |
| DM10922P3 | 0.02623713 | -1.5341252 | 1.3571153  | 1.1479306  |                            |
| DM08249P4 | 0.02628917 | 1.3958025  | 1.9235756  | 1.3778646  |                            |
| DM07251P2 | 0.02629155 | 2.1585674  | 5.077276   | 1.4832832  |                            |
| DM00860P1 | 0.02634672 | 1.0972581  | -1.053707  | 1.2224452  | NEMVEDRAFT XM_001631621.1  |
| DM04327P1 | 0.02640492 | -1.022983  | -1.0879748 | -1.1509635 |                            |
| DM11709P3 | 0.02648281 | -1.0721924 | 1.0454923  | -1.1773846 |                            |
| DM07810P3 | 0.02649283 | -1.0866171 | 1.0170366  | -1.3366297 |                            |
| DM09217P1 | 0.02653239 | 1.4177425  | 1.4869399  | 1.2273958  |                            |
| DM00097P2 | 0.02653994 | -1.2670935 | -1.4268789 | -1.2660489 | DWIL\GK183:XM_002075444.1  |
| DM04610P2 | 0.02659745 | 1.1583006  | 1.1709539  | 1.2379783  |                            |
| DM12037P2 | 0.02665919 | 1.0800151  | 1.2007856  | 1.3874964  |                            |
| DM03659P1 | 0.02666596 | -1.4565436 | -1.0855705 | -1.026524  | LOC552533 XM_624909.2      |
| DM01028P3 | 0.02669672 | -1.0050455 | 1.0442379  | 1.1684247  |                            |
| DM12318P2 | 0.02673104 | -1.1602736 | 1.219531   | -1.159839  |                            |
| DM08833P1 | 0.02673885 | -1.1018263 | -1.3489906 | 2.2376733  |                            |
| DM00408P3 | 0.02676981 | -1.1243116 | -1.124394  | 1.1852378  | DVIR\GJ2411 XM_002053828.1 |
| DM06828P3 | 0.0268226  | 1.2093562  | 1.3744285  | 1.8185015  |                            |
| DM10744P1 | 0.02686709 | -1.0487448 | -1.1185544 | 1.2466964  |                            |
| DM12661P1 | 0.02686916 | -1.0329947 | -1.24376   | -1.098592  |                            |
| DM08554P1 | 0.02690312 | 1.1565937  | -1.9542474 | 1.1749176  |                            |
| DM08782P2 | 0.02692996 | 1.5471803  | 1.7589562  | -1.2403709 |                            |
| DM12291P1 | 0.02695655 | 1.1613042  | 1.2655557  | 1.462394   |                            |
| DM10962P4 | 0.02699087 | -1.1511043 | 1.1100649  | 1.0760291  |                            |
| DM04911P1 | 0.02700709 | -1.0109375 | 1.0714374  | 1.3221797  | PB103351.00 XM_666562.1    |
| DM00009P3 | 0.02702063 | 1.0098091  | -1.1571951 | -1.29899   | LOC1001425:XM_001812711.1  |
| DM12402P3 | 0.02702132 | 1.2384038  | 1.323427   | 1.3701711  |                            |
| DM03843P3 | 0.02702376 | 1.0751911  | 1.3305602  | -3.3867493 |                            |
| DM12724P1 | 0.02704795 | -1.0148602 | 1.2708007  | -1.318983  |                            |
| DM09790P1 | 0.02705281 | 1.16125    | 1.2531573  | 1.2119843  |                            |
| DM11450P3 | 0.02707717 | -1.2486291 | 1.5366297  | -5.032806  | TC00.104705 XM_810909.1    |
| DM14760P2 | 0.02714155 | -1.0185446 | -1.5099376 | 1.5356966  | LOC1000193:XM_001367740.1  |
| DM02675P4 | 0.02719991 | -1.1079806 | -1.0607214 | -1.3496072 |                            |
| DM13115P1 | 0.02723415 | -1.2549418 | -1.2230333 | 1.2087916  |                            |
| DM03026P2 | 0.02729249 | -1.6653727 | -1.7846757 | -1.8432978 |                            |
| DM08490P1 | 0.02732352 | 1.4115299  | 1.5223665  | 1.8109506  |                            |
| DM11952P1 | 0.02732352 | -1.0322832 | 1.1312975  | -1.1931176 |                            |
| DM00900P1 | 0.02732802 | 1.0837514  | -1.0066131 | -1.2039593 | CMU_001310 XM_002141573.1  |
| DM00383P1 | 0.02732877 | -1.0581151 | -1.0794898 | -1.1764325 |                            |

|           |            |            |            |            |                            |
|-----------|------------|------------|------------|------------|----------------------------|
| DM01040P2 | 0.02736417 | -1.0777684 | -1.0241122 | -1.2371334 | DMOJ\GI1534 XM_002009385.1 |
| DM10150P1 | 0.02738206 | -1.050526  | -1.525796  | -1.6797616 |                            |
| DM00565P3 | 0.02738221 | -1.0728325 | -1.1456879 | -1.4536124 | AAEL_AAEL01 XM_001655876.1 |
| DM12940P2 | 0.0273834  | -1.1651912 | -1.2081655 | -1.1943762 |                            |
| DM14755P1 | 0.02742093 | -1.1280891 | -1.07432   | -1.4942768 |                            |
| DM06697P3 | 0.02742459 | -1.1356002 | -1.1444341 | -1.2356184 |                            |
| DM05901P1 | 0.02746922 | 1.2411149  | 1.225578   | 1.3938797  | AGAP_AGAP0 XM_314158.4     |
| DM12179P3 | 0.02746965 | 1.1107576  | 1.0894182  | 1.8595015  | LOC657243 XM_963712.2      |
| DM12336P2 | 0.02747265 | 1.0821761  | -1.075716  | -1.1562147 |                            |
| DM09747P3 | 0.02748888 | 1.0554564  | -1.0187265 | 1.2644632  |                            |
| DM10420P3 | 0.02749979 | -1.0718665 | -1.3125583 | 1.140335   |                            |
| DM06376P2 | 0.02753145 | 1.0891398  | -1.1028188 | -1.2209592 | DPER\GL2285 XM_002024060.1 |
| DM00379P4 | 0.02755706 | 1.2344618  | 1.1561695  | 1.5293738  | LOC409759 XM_393252.3      |
| DM06002P3 | 0.02758303 | -1.0562954 | 1.0763981  | -1.2470992 |                            |
| DM11011P3 | 0.02764986 | 1.0003253  | 1.271008   | -1.0235314 |                            |
| DM00357P4 | 0.02767787 | -1.0491165 | 1.060334   | -1.1992296 | LOC661599 XR_043119.1      |
| DM01178P1 | 0.02767916 | 1.4291785  | 1.2461958  | 1.4644742  |                            |
| DM13348P1 | 0.02771151 | -1.1652001 | -1.0263954 | -1.5045599 |                            |
| DM03859P2 | 0.02779036 | 1.4022815  | -1.589078  | -1.76277   |                            |
| DM11966P2 | 0.02780491 | -1.3399521 | -1.6894557 | -1.339093  |                            |
| DM03257P4 | 0.02782601 | -1.0858052 | -1.0915192 | 1.2439497  |                            |
| DM04086P1 | 0.02783577 | 1.1105525  | -1.0410606 | -1.1246502 |                            |
| DM05253P2 | 0.02787056 | -1.0831084 | 1.0319902  | -1.1850672 |                            |
| DM00884P2 | 0.02787343 | -1.1203213 | 1.0409375  | -1.5492073 | DPSE\GA1856 XM_001353045.2 |
| DM05052P3 | 0.02789764 | -1.4903336 | -1.5756991 | -2.2353442 |                            |
| DM04096P3 | 0.02798674 | -1.3814461 | -1.0324469 | 1.5020099  | LOC408559 XM_623249.2      |
| DM02329P3 | 0.0280251  | -1.0890241 | 1.0621593  | 1.41282    | DWIL\GK2386 XM_002069092.1 |
| DM06094P1 | 0.02802833 | -1.1031617 | -1.0336235 | -1.3231388 |                            |
| DM03054P2 | 0.02803397 | -1.075499  | -1.3559465 | -1.2790426 | DVIR\GJ2408 XM_002053769.1 |
| DM13605P1 | 0.02804571 | 1.0086571  | -1.0712882 | 1.1852672  | DVIR\GJ2128 XM_002048843.1 |
| DM01250P1 | 0.02809021 | -1.0816985 | -1.2141174 | -1.073172  | ANON-381ME XM_002106913.1  |
| DM06054P2 | 0.02809169 | 1.0533632  | -1.0134505 | -1.286985  |                            |
| DM00243P2 | 0.02810616 | -1.1061752 | 1.0120833  | -1.5252787 | LOC10019466 NM_001139749.1 |
| DM08963P1 | 0.02811549 | -1.0663527 | 1.1374336  | 1.4182584  |                            |
| DM10728P2 | 0.02811766 | 1.02961    | -1.1727556 | 1.288179   | MMD NM_206752.2            |
| DM08906P1 | 0.02812484 | -1.1988307 | -1.0944138 | -1.250129  |                            |
| DM11301P4 | 0.02819313 | 1.0697874  | -1.1824985 | -1.2834831 |                            |
| DM01891P3 | 0.02823902 | 1.181631   | 1.0785012  | -1.0150143 | LOC10020067 XM_002165382.1 |
| DM06184P3 | 0.02825648 | -1.2677617 | -1.0292559 | 1.1221929  | LOC10016256 XM_001943151.1 |
| DM00655P3 | 0.02826436 | -1.0102373 | 1.1209203  | 1.1933838  | DPSE\GA2177 XM_001357799.2 |
| DM04526P2 | 0.02826543 | 1.1444585  | -1.0534726 | -1.0661134 |                            |
| DM12333P2 | 0.02837845 | 1.1619816  | 1.1135724  | -1.0700095 |                            |
| DM04785P2 | 0.02840692 | -1.1436605 | 1.1026127  | -1.3351134 |                            |
| DM00103P2 | 0.02840982 | 1.1368922  | 1.1026214  | -1.2111974 | AAEL_AAEL0C XM_001652533.1 |
| DM05176P3 | 0.02842522 | 1.498894   | 1.2310265  | 1.0090272  |                            |
| DM08172P1 | 0.02844482 | -1.0024139 | -1.0729687 | -1.2638755 |                            |
| DM02265P4 | 0.02845345 | 1.4277635  | 1.9041663  | 2.0763915  |                            |
| DM02096P3 | 0.02857085 | -1.2068485 | -1.0011317 | 1.4740742  |                            |
| DM12590P1 | 0.02857962 | -1.1138341 | -1.3355011 | -1.1197671 |                            |
| DM01057P2 | 0.02858192 | -1.2539005 | -1.1575804 | -1.1069357 | NEMVEDRAFT XM_001634500.1  |

|           |            |            |            |            |                            |
|-----------|------------|------------|------------|------------|----------------------------|
| DM05364P2 | 0.02861452 | 1.4978981  | 1.4777297  | 1.5396724  |                            |
| DM05800P1 | 0.02862807 | 1.014127   | -1.123566  | -1.32104   |                            |
| DM09712P3 | 0.02865862 | -1.0246869 | -1.086678  | -1.3151587 |                            |
| DM03210P2 | 0.02866527 | 1.1261091  | 1.4648892  | 1.2908465  | NEMVEDRAFT XM_001640486.1  |
| DM01149P2 | 0.02869262 | 1.1187434  | 1.0184414  | -1.0832402 | OSTLU_4538' XM_001417091.1 |
| DM10232P3 | 0.02871804 | 1.3715782  | 1.4628294  | 1.3786732  |                            |
| DM13643P2 | 0.02871866 | -1.3235747 | -1.1304594 | -1.1787843 |                            |
| DM09000P2 | 0.02872402 | -1.164734  | -1.2598053 | -1.3340379 | LOC1001772' XM_002131598.1 |
| DM10101P4 | 0.02877761 | 1.2910448  | 1.3479022  | 1.5016142  |                            |
| DM02493P3 | 0.02878249 | -1.1401807 | -1.0442945 | -1.286177  | LWR XM_623680.2            |
| DM07701P3 | 0.0287844  | 1.1602209  | 1.0333077  | -1.0006222 |                            |
| DM00431P2 | 0.0287962  | 1.0308942  | -1.0107425 | -1.3674974 | LOC1000178' XM_001365706.1 |
| DM05778P1 | 0.02880688 | 1.2012192  | -1.0075822 | -1.1991395 |                            |
| DM01453P3 | 0.02881254 | 1.163177   | 1.0235686  | -1.1822605 | LOC1001624' XM_001947394.1 |
| DM11187P2 | 0.02881902 | 1.2167202  | 1.3713367  | 1.1278218  |                            |
| DM11200P2 | 0.02886125 | -1.1144338 | -1.1339555 | -1.4218817 |                            |
| DM00975P3 | 0.02888166 | 1.0934669  | 1.1441388  | 1.019506   |                            |
| DM02711P4 | 0.02888573 | -1.2814338 | -1.072474  | -1.1632546 | NEDD8 NM_174764.3          |
| DM01331P2 | 0.02889521 | 1.1116446  | 1.1547978  | 1.2208332  |                            |
| DM03587P1 | 0.02890206 | -1.1090575 | -1.0308088 | -1.3178058 |                            |
| DM14010P1 | 0.0289022  | -1.0695002 | 1.069923   | 1.2653487  |                            |
| DM04770P3 | 0.02890313 | -1.0289377 | 1.0309695  | -1.1804267 |                            |
| DM02060P1 | 0.02890622 | 1.0571555  | -1.0088129 | -1.1938726 |                            |
| DM06021P1 | 0.02893943 | -1.2181581 | 1.0379018  | 1.0105085  |                            |
| DM00835P2 | 0.02894397 | -1.0384237 | -1.0634224 | -1.4144236 | DWIL\GK175' XM_002062442.1 |
| DM12172P1 | 0.02902196 | -1.2277735 | -1.2251228 | -1.2455114 |                            |
| DM02553P3 | 0.02904455 | -1.2034136 | 1.0562602  | 1.401958   |                            |
| DM07452P1 | 0.0290731  | -1.019315  | -1.0753314 | 1.698529   |                            |
| DM11635P1 | 0.02907744 | 1.2916206  | 1.0846354  | -1.2282264 |                            |
| DM10712P2 | 0.02911316 | 1.3842044  | -1.0468899 | 1.012501   |                            |
| DM02421P3 | 0.02917538 | -1.177345  | -1.0996082 | -1.3636276 | LOC1001906' XM_002200394.1 |
| DM09030P1 | 0.02930929 | 1.1964619  | 1.3823465  | 1.0596119  |                            |
| DM05927P1 | 0.02932806 | 2.1237774  | 2.07822    | 2.1778297  |                            |
| DM07285P1 | 0.02938073 | -1.2859577 | -1.3462411 | -1.4777465 |                            |
| DM00189P2 | 0.02938498 | -1.0034997 | 1.0891219  | -1.2054313 | DANA\GF116' XM_001960196.1 |
| DM03818P1 | 0.02941004 | -1.1447936 | -1.0253191 | 1.1617384  | SLC35E3 NM_001134687.1     |
| DM00974P2 | 0.0294644  | 1.1318902  | 1.2397023  | 1.2647232  | LOC1000800' XM_001510886.1 |
| DM06562P1 | 0.02946621 | 1.321165   | 1.4459277  | 1.2864548  |                            |
| DM00694P4 | 0.02947024 | -1.1780415 | -1.4061428 | -1.283055  | LOC1000778' XM_001508945.1 |
| DM02542P4 | 0.02947836 | 1.056331   | -1.2162858 | -1.2879388 | LOC660338 XM_966576.2      |
| DM03441P4 | 0.02947845 | 1.0056483  | -1.0344284 | -1.1798329 | LOC1000762' XM_001507632.1 |
| DM01130P2 | 0.02955622 | 1.4345014  | 1.6450963  | 1.5577322  | CYP4V2 NM_001092584.1      |
| DM07160P1 | 0.02957587 | -1.104295  | -1.0986202 | -1.2862102 |                            |
| DM06740P2 | 0.02959719 | 1.0860331  | 1.049369   | 1.1197487  |                            |
| DM11691P1 | 0.02959921 | -1.0508734 | -1.1956922 | -1.409768  |                            |
| DM12185P3 | 0.02962956 | -1.0832411 | -1.0364445 | -1.5530508 |                            |
| DM02097P3 | 0.02969982 | -1.0356096 | -1.10811   | -1.2409447 | ZGC:123298 NM_001037560.1  |
| DM01282P3 | 0.02971161 | 1.1793951  | -1.3092593 | -1.1301141 |                            |
| DM09290P3 | 0.0297344  | 1.0233448  | 1.3563069  | 1.4783998  |                            |
| DM08386P1 | 0.02974537 | 1.0543911  | -1.2765523 | -1.2924439 |                            |



|           |            |            |            |            |             |                |
|-----------|------------|------------|------------|------------|-------------|----------------|
| DM13531P1 | 0.02979738 | -1.1743973 | -1.200735  | -1.2577055 |             |                |
| DM14995P1 | 0.02981003 | -1.0691496 | 1.0960758  | 1.0748684  |             |                |
| DM14905P1 | 0.02981928 | -1.0669013 | -1.6164243 | 2.1331844  |             |                |
| DM00516P1 | 0.02982091 | 1.0811532  | -1.1192116 | -1.2656003 | HDAC6       | NM_001169289.1 |
| DM00931P3 | 0.02987161 | 1.7358075  | 1.4580013  | -1.6260928 | DPSE\GA219  | XM_001357620.2 |
| DM11422P1 | 0.02994847 | 1.0967363  | 1.0089588  | -1.1427699 |             |                |
| DM08437P2 | 0.03007316 | 1.0396953  | -1.1433297 | -1.3642715 |             |                |
| DM03468P3 | 0.03009867 | 1.0811683  | -1.0421028 | -1.2208686 | LOC658753   | XM_965115.1    |
| DM02556P3 | 0.03015743 | -1.0613846 | -1.2094567 | -1.4776404 | DVIR\GJ2188 | XM_002049942.1 |
| DM12061P4 | 0.03022749 | -1.0771217 | -1.1618148 | -1.2523516 |             |                |
| DM14697P3 | 0.0302433  | 1.168155   | 1.3408333  | 1.1707705  |             |                |
| DM08337P1 | 0.03027359 | -1.1844652 | -1.0481256 | -1.2402865 |             |                |
| DM04623P1 | 0.03028329 | 1.0332854  | 1.039519   | -1.3099405 |             |                |
| DM05121P1 | 0.03028523 | 1.0376476  | -1.0547993 | 1.4051034  |             |                |
| DM11655P1 | 0.03031738 | -1.125884  | 1.0332445  | -1.0752925 |             |                |
| DM12427P4 | 0.03032271 | -1.2160866 | -1.5760385 | -1.6007357 |             |                |
| DM09335P1 | 0.03034244 | -1.3464805 | 1.1592906  | -1.1815435 |             |                |
| DM08734P2 | 0.03035105 | -1.2190442 | -1.0006536 | 1.1411693  |             |                |
| DM09222P1 | 0.03035483 | 1.2535847  | -1.2457402 | 1.5919255  |             |                |
| DM00293P1 | 0.03040427 | 1.1297137  | 1.0436594  | -1.0766907 | BRAFLDRAFT  | XM_002608605.1 |
| DM04114P3 | 0.03041298 | 1.1291156  | -1.0219045 | -1.3716427 |             |                |
| DM01588P1 | 0.03052541 | -1.0385278 | -1.1257348 | -1.1888222 | PSMD14      | NM_021526.2    |
| DM05721P3 | 0.03053926 | 1.0084006  | -1.134169  | 1.2898958  |             |                |
| DM06610P1 | 0.03054206 | 1.4207207  | 1.6238135  | 1.3551433  |             |                |
| DM01615P1 | 0.03057467 | 1.0469674  | 1.1930197  | 1.5458859  | MHC         | XM_002090481.1 |
| DM08771P2 | 0.0306014  | -1.1076845 | -1.1544534 | 1.0574319  | ZGC:163069  | NM_001089565.1 |
| DM05574P1 | 0.03063505 | -1.1636666 | -1.835361  | -1.0626452 |             |                |
| DM07819P2 | 0.03065427 | -1.154754  | 1.0855137  | -1.2096179 | CG12480     | NM_132709.1    |
| DM07757P1 | 0.03067711 | 1.0590657  | 1.1837692  | 1.2387443  |             |                |
| DM07362P4 | 0.03068491 | 1.2371718  | 1.4463143  | 1.2206895  |             |                |
| DM01323P3 | 0.03070165 | -1.1297599 | -1.0530668 | -1.2420061 | LOC1001907  | XM_002190098.1 |
| DM09450P3 | 0.03075293 | 1.5470791  | 1.2832031  | 1.2217548  |             |                |
| DM02174P3 | 0.03079482 | -1.1462489 | -1.1389062 | -1.209222  | LYPLA1      | NM_001005699.1 |
| DM02793P1 | 0.03081601 | -1.001175  | -1.3153197 | -1.162528  | LOC409755   | XM_393249.3    |
| DM00309P3 | 0.03082623 | 1.3321539  | 1.159089   | 1.2747104  | ACS2        | XM_001700178.1 |
| DM13032P2 | 0.03084045 | 1.0177035  | 1.1452591  | 1.3911769  |             |                |
| DM07989P1 | 0.03086232 | -1.1789131 | 1.0515131  | 1.3430531  |             |                |
| DM13805P4 | 0.0308807  | 1.8362768  | 1.5079273  | 1.610858   |             |                |
| DM03211P1 | 0.03088863 | 1.2616662  | 1.19403    | 1.0296621  |             |                |
| DM03122P2 | 0.03096131 | 1.0709127  | 1.248032   | -1.0947325 | DGRI\GH106  | XM_001988219.1 |
| DM04870P2 | 0.03096157 | 1.1618328  | -1.2074454 | -1.1522226 | DGRI\GH244  | XM_001992040.1 |
| DM06301P4 | 0.03099487 | 1.2414545  | 1.0519664  | -1.3361394 |             |                |
| DM00708P4 | 0.03099879 | -1.0573024 | -1.0249083 | -1.234312  | LOC1002261  | XM_002191632.1 |
| DM06661P1 | 0.03099928 | -1.267035  | 1.0868531  | 1.104472   |             |                |
| DM03527P1 | 0.0310106  | -1.0016704 | 1.1288596  | -1.1797105 |             |                |
| DM04892P2 | 0.03108056 | -1.145226  | -1.0059688 | -1.7230493 |             |                |
| DM03570P3 | 0.03111262 | -1.1072835 | -1.1069947 | -1.2428559 | ARCN1       | NM_201459.1    |
| DM12915P1 | 0.0311251  | -1.069435  | 1.0588619  | 1.4051098  |             |                |
| DM03621P3 | 0.03112629 | -1.1642088 | -1.0965555 | -1.0134413 | DMOJ\GI242  | XM_001998866.1 |
| DM05385P2 | 0.03112673 | -1.0509341 | 1.0195639  | -1.5199983 |             |                |

|           |            |            |            |            |                           |
|-----------|------------|------------|------------|------------|---------------------------|
| DM10584P1 | 0.03113676 | -1.0747713 | 1.1159388  | -1.0057397 |                           |
| DM14959P2 | 0.03115599 | 1.3156613  | 1.31922    | 1.3351517  |                           |
| DM13250P2 | 0.03118161 | 1.1192384  | 1.0584763  | -1.5492421 |                           |
| DM05172P4 | 0.03121119 | 2.2664545  | 2.4961357  | 1.1880014  |                           |
| DM10776P1 | 0.0312301  | 1.0345767  | -1.3869622 | -1.3427466 |                           |
| DM01036P1 | 0.03125984 | 1.2913039  | 1.0243533  | -1.0557413 | 5033411D12INM_138654.3    |
| DM09890P3 | 0.03127132 | 1.1014279  | -1.1275622 | -1.1852058 |                           |
| DM00517P4 | 0.03129724 | -1.0096451 | 1.0908668  | -1.3531221 | LOC1002071'XM_002165178.1 |
| DM03127P1 | 0.03132122 | 1.3912807  | 1.5969994  | 1.2193255  |                           |
| DM01879P2 | 0.03141177 | -1.0887109 | 1.0450486  | 1.3358777  |                           |
| DM06463P1 | 0.03142782 | 1.3631489  | 2.0988681  | 1.490755   |                           |
| DM02524P3 | 0.03146908 | -1.0225276 | 1.0634278  | -1.228088  | LOC612762 XM_850950.1     |
| DM13537P2 | 0.03148697 | -1.1526135 | -1.190358  | 1.1734992  |                           |
| DM02330P1 | 0.03148869 | -1.0401462 | 1.0049417  | -1.3127723 | DMOJ\GI219(XM_002003541.1 |
| DM04043P3 | 0.03151088 | 1.0306587  | -1.0509657 | -1.2228686 | LOC577217 XM_001176424.1  |
| DM13018P3 | 0.03151375 | -1.2162094 | -1.1823536 | 1.0494428  |                           |
| DM07201P1 | 0.03151665 | 1.1506474  | 1.0220163  | -1.5599217 |                           |
| DM03434P3 | 0.03152638 | 1.1948063  | 1.2241957  | 1.0741329  | LOC590798 XM_001193300.1  |
| DM01877P1 | 0.03152978 | -1.101931  | -1.2249954 | 1.1376756  | DWIL\GK179'XM_002068738.1 |
| DM06420P1 | 0.03154583 | 1.9973526  | 2.5144045  | 2.3294399  |                           |
| DM01524P3 | 0.03155522 | -1.1424078 | -1.2416632 | -1.0936301 | ATP6VOB NM_199561.1       |
| DM13133P2 | 0.03159741 | -1.072194  | 1.2301565  | 1.3809166  |                           |
| DM07058P1 | 0.0318478  | 1.3447286  | -1.8154095 | 1.3902333  |                           |
| DM08274P3 | 0.03187801 | 1.1645656  | 1.0026759  | 1.8244116  |                           |
| DM11160P4 | 0.03188442 | -1.1445075 | 1.099312   | -1.2622329 |                           |
| DM04131P4 | 0.03193969 | 1.385838   | 1.4456122  | 1.5002313  |                           |
| DM12067P3 | 0.03194245 | 1.4719076  | 1.5093652  | -1.6254077 |                           |
| DM04105P4 | 0.03197686 | 1.1811489  | 1.3200499  | -1.0450375 |                           |
| DM04466P2 | 0.03199124 | -1.0284201 | -1.0105281 | 1.3228967  | LOC727647 XM_001123354.1  |
| DM02215P1 | 0.03199842 | -1.0086927 | 1.0179085  | -1.3345777 | GPN1 NM_007266.3          |
| DM01788P1 | 0.03200834 | -1.0825024 | -1.2130449 | -1.344586  | LOC408412 XM_391959.3     |
| DM11435P1 | 0.03200856 | 1.4105518  | 2.3880143  | 1.3282758  |                           |
| DM02353P1 | 0.03204564 | -1.8606081 | -1.5415217 | -2.0224693 | LOC1001231'XM_001606729.1 |
| DM09658P2 | 0.03206289 | 1.2165287  | 1.4075122  | 1.0545845  |                           |
| DM03603P3 | 0.03206316 | 1.272745   | 1.3548398  | 1.1036458  |                           |
| DM02693P3 | 0.03208238 | -1.0073094 | -1.1578655 | -1.2588962 | DWIL\GK162'XM_002067310.1 |
| DM12436P1 | 0.03213395 | 1.2283969  | -1.2548047 | 1.2696748  |                           |
| DM11823P1 | 0.03213909 | -1.027867  | 1.1003776  | 1.3231266  |                           |
| DM02173P1 | 0.0322423  | -1.0839312 | -1.3587996 | 1.027987   |                           |
| DM03417P4 | 0.03226015 | 1.0945611  | 1.0293474  | -1.5052489 |                           |
| DM01575P4 | 0.03226379 | -1.001898  | -1.0592211 | -1.2622122 | PPP2R1A NM_204074.1       |
| DM10049P3 | 0.03227253 | -1.0705845 | -1.1032151 | -1.4805546 |                           |
| DM11906P1 | 0.03230343 | 1.3423686  | 1.4371135  | 1.3288878  |                           |
| DM05033P3 | 0.03230839 | -1.0554621 | 1.019534   | 1.1407892  |                           |
| DM10830P2 | 0.03231397 | 1.1144494  | -1.0186088 | -1.191633  |                           |
| DM03336P2 | 0.03248117 | 1.2522836  | -1.8524406 | 1.5118545  | LOC1001609'XM_001944483.1 |
| DM06397P2 | 0.03251469 | 1.1974281  | 1.0652524  | 1.6370366  |                           |
| DM09945P1 | 0.03251688 | 1.0124508  | -1.0305387 | -1.2758977 |                           |
| DM08141P2 | 0.03253137 | -1.0323423 | 1.1028721  | 1.5441248  |                           |
| DM12206P4 | 0.0325575  | -1.0872768 | -1.3004557 | -1.3416384 |                           |

|           |            |            |            |            |              |                |
|-----------|------------|------------|------------|------------|--------------|----------------|
| DM07319P2 | 0.03257345 | -1.375128  | -1.1739323 | -2.1190588 |              |                |
| DM05125P3 | 0.03258704 | 1.00034    | -1.1734736 | -1.2288303 | NDUFA9       | XM_001659951.1 |
| DM12554P2 | 0.03259578 | 1.0816696  | 1.1925906  | 1.1329589  |              |                |
| DM09638P4 | 0.0327293  | -1.0564536 | 1.0968612  | 1.307674   |              |                |
| DM00856P3 | 0.03275319 | 1.0129282  | -1.0161483 | -1.3489537 |              |                |
| DM00742P1 | 0.03275712 | -1.1559827 | 1.1045682  | -1.3737875 | SNRPA1       | NM_001094394.1 |
| DM07642P3 | 0.03277246 | 1.2587901  | 1.1845037  | 1.5640024  |              |                |
| DM08419P1 | 0.03277608 | -1.0012662 | -1.0757909 | -1.4593079 | DWIL\GK168   | XM_002062121.1 |
| DM06098P1 | 0.03278784 | -1.5286118 | -1.4899361 | -1.2491368 |              |                |
| DM11777P1 | 0.03279563 | 1.0750728  | 1.150148   | -1.1855857 |              |                |
| DM07326P2 | 0.03285926 | 1.0934569  | -1.1125587 | 1.1535761  |              |                |
| DM03160P1 | 0.03287849 | 1.0291661  | -1.089576  | -1.1345619 | DWIL\GK129   | XM_002073854.1 |
| DM11060P3 | 0.0328942  | 1.0550767  | -1.0795666 | -1.1765331 |              |                |
| DM02189P2 | 0.0329008  | -1.1509252 | -1.0194688 | 1.0392492  | BRAFLDRAFT   | XM_002594778.1 |
| DM01612P4 | 0.0329195  | -1.0373327 | -1.0887077 | -1.2878674 | DANA\GF135   | XM_001960765.1 |
| DM01701P2 | 0.03292333 | -1.0550787 | 1.1422844  | 1.3358318  | AAEL_AAEL0C  | XM_001658997.1 |
| DM03664P4 | 0.03292845 | -1.0459665 | -1.4524593 | 1.0260487  | ADAMTS13     | XM_610784.2    |
| DM02231P1 | 0.03294647 | 1.0461371  | -1.1004207 | 1.2758224  | AGAP_AGAP0   | XM_316909.4    |
| DM11680P3 | 0.03296519 | 1.1309105  | 1.3203195  | 1.0591738  |              |                |
| DM01640P2 | 0.03296701 | 1.0196662  | 1.2030946  | 1.2904439  | TRIADDRAFT   | XM_002107679.1 |
| DM08876P2 | 0.03304853 | 1.4609896  | 2.0130916  | 1.6681125  |              |                |
| DM01796P2 | 0.03320245 | 1.0752791  | 1.1918113  | 1.3215815  | RHO          | XM_001651947.1 |
| DM09679P2 | 0.03326333 | -1.0312189 | -1.1095239 | 1.1093313  |              |                |
| DM14954P1 | 0.03328388 | 1.1905752  | 1.06776    | -1.3527658 |              |                |
| DM09367P2 | 0.03339741 | -1.0378277 | 1.2282809  | -1.0579468 | DERE\GG229   | XM_001979587.1 |
| DM02405P1 | 0.03342629 | -1.1357874 | -1.2308915 | 1.2251943  |              |                |
| DM05184P1 | 0.03347529 | 1.4221853  | 1.3823496  | 1.4780734  |              |                |
| DM09362P2 | 0.03353634 | -1.0658619 | 1.0704646  | 1.2698702  |              |                |
| DM00162P3 | 0.03355065 | 1.0482264  | -1.061337  | -1.2068385 | DANA\GF225   | XM_001965553.1 |
| DM09914P3 | 0.03361285 | -1.2823169 | -1.3177581 | -1.2089202 | SECC22       | XM_001656246.1 |
| DM01079P2 | 0.03364968 | 1.0440842  | -1.0772864 | -1.3632423 | LOC552324    | XM_624699.2    |
| DM06838P1 | 0.03371379 | 1.8318998  | 2.6788542  | 2.437297   |              |                |
| DM11891P1 | 0.03377919 | -1.2728347 | -1.0016001 | -1.180352  |              |                |
| DM04053P2 | 0.03378196 | -1.0623317 | -1.2392086 | -1.2171522 |              |                |
| DM04192P1 | 0.03380238 | 1.1076835  | -1.202131  | -1.0021497 | LOC1001673   | XM_001946095.1 |
| DM05136P3 | 0.03382835 | -1.593338  | -1.4936401 | -1.5707303 |              |                |
| DM12512P3 | 0.03385118 | -1.1436322 | 1.0203412  | -2.0310946 |              |                |
| DM04484P3 | 0.03390198 | 1.091415   | -1.2808437 | 1.290617   |              |                |
| DM05771P2 | 0.03394808 | -1.1531794 | -1.0683731 | -1.2088945 |              |                |
| DM01259P3 | 0.03399788 | 1.28286    | 1.307269   | 1.1448045  | LOC1001757   | XM_002128334.1 |
| DM02344P1 | 0.03402357 | 1.2535516  | 1.368922   | -1.2837774 | CPIPJ_CPIJ01 | XM_001869281.1 |
| DM05479P1 | 0.03405398 | 1.0511093  | 1.0580891  | -1.2437547 |              |                |
| DM03683P1 | 0.03409534 | -1.0290395 | -1.0820265 | -1.2887424 | PROS54       | XM_393112.3    |
| DM06853P2 | 0.03410621 | 1.266027   | 1.1231887  | 1.4184923  |              |                |
| DM11965P1 | 0.03410947 | 1.2251424  | 1.1850891  | -1.0711854 |              |                |
| DM14913P4 | 0.03417159 | -1.4239808 | -1.3773968 | 1.1757046  |              |                |
| DM03493P2 | 0.03417523 | 1.0924586  | 1.0870348  | 1.2681295  | AAEL_AAEL01  | XM_001661979.1 |
| DM00720P3 | 0.03419075 | 1.0328587  | 1.0534886  | -1.1930692 | DMOJ\GI221   | XM_002001067.1 |
| DM05815P3 | 0.0341946  | 1.6467111  | 1.8281275  | 1.7768744  |              |                |
| DM06516P3 | 0.03421071 | 1.1176827  | -1.0307102 | -1.3616973 |              |                |

|           |            |            |            |            |            |                |
|-----------|------------|------------|------------|------------|------------|----------------|
| DM11102P2 | 0.03421287 | -1.0938107 | -1.0371606 | -1.2994268 |            |                |
| DM01386P1 | 0.03423646 | -1.0595038 | -1.0170268 | -1.1606996 | PPM1H      | NM_001140246.1 |
| DM14137P3 | 0.03423846 | -1.1486106 | -1.4510347 | -1.7603062 |            |                |
| DM08442P1 | 0.03426546 | 1.0343815  | 1.5872244  | -1.3762116 |            |                |
| DM01740P1 | 0.03428386 | 1.0131617  | -1.0284961 | -1.2207526 | CTSC       | NM_001033617.1 |
| DM03568P2 | 0.0342951  | 1.6745255  | -1.2644739 | -1.7368417 | DWIL\GK221 | XM_002066036.1 |
| DM14301P3 | 0.03431439 | 1.2644025  | 1.4433084  | 1.3184934  |            |                |
| DM08108P3 | 0.0343967  | 3.3194313  | 6.1581054  | 2.0832717  | DWIL\GK162 | XM_002067212.1 |
| DM14829P3 | 0.0343997  | 1.1037945  | 1.1643051  | 1.3175192  |            |                |
| DM00857P1 | 0.03447203 | -1.5362263 | -1.5976378 | -1.796717  |            |                |
| DM12443P1 | 0.03448365 | -1.2509935 | -1.2187561 | 1.0380352  |            |                |
| DM06065P2 | 0.03450939 | 1.1603416  | 1.1915312  | 1.1085607  | LOC1000754 | XM_001506879.1 |
| DM05298P2 | 0.03453574 | -1.0872402 | -1.061121  | 1.1756909  |            |                |
| DM10885P3 | 0.03455396 | -1.3928165 | -1.1945103 | -1.5600876 |            |                |
| DM01455P3 | 0.03457141 | 1.0289638  | 1.1073779  | -1.3061353 | LOC1000265 | XM_001377097.1 |
| DM15092P2 | 0.03457198 | 1.5711722  | 1.7996299  | 1.5142525  |            |                |
| DM03862P1 | 0.0346128  | 1.1373043  | -1.0299054 | -1.2857535 | LOC1002014 | XM_002157761.1 |
| DM10958P1 | 0.03473152 | 1.0520169  | -1.0261062 | -1.1293582 |            |                |
| DM10271P3 | 0.03476426 | 3.0702367  | 6.0575337  | -1.0739057 |            |                |
| DM01498P1 | 0.03478601 | -1.8898251 | -2.0754085 | -1.071132  |            |                |
| DM02516P3 | 0.03479752 | -1.2098306 | -1.4795076 | -1.3926722 | TRAM       | XM_001663502.1 |
| DM10745P3 | 0.03481246 | -1.1314609 | 1.0507413  | -1.6062799 |            |                |
| DM03451P2 | 0.03486239 | -1.0760475 | 1.0624552  | -1.1788386 | LOC1001863 | XM_002131086.1 |
| DM05138P3 | 0.03486307 | 1.1623582  | 1.1352643  | 1.0777644  |            |                |
| DM04409P3 | 0.03486753 | 1.1431528  | 1.0471578  | -1.1530027 |            |                |
| DM09509P4 | 0.03488965 | -1.0311227 | -1.0101718 | -1.2075394 |            |                |
| DM10643P2 | 0.03492301 | 1.109883   | -1.2570332 | -1.3348778 |            |                |
| DM01590P4 | 0.03495399 | 1.0041231  | -1.1335909 | -1.2276006 | LOC1001170 | XM_001599789.1 |
| DM04858P2 | 0.0350089  | -1.1017084 | 1.2718039  | -1.1816759 |            |                |
| DM11337P3 | 0.03502139 | 1.0717317  | 1.0978854  | -1.2059703 |            |                |
| DM12592P3 | 0.03502458 | -1.123639  | -1.3046101 | -1.5210562 |            |                |
| DM15169P2 | 0.03504846 | -1.1066157 | -1.267384  | -1.3797857 |            |                |
| DM02507P3 | 0.03505905 | -1.2738914 | -1.0748789 | 1.4885126  | DWIL\GK170 | XM_002061732.1 |
| DM03361P1 | 0.03509669 | -1.0573095 | -1.0216801 | -1.2625995 | THOC4      | NM_001162183.1 |
| DM06990P1 | 0.03511822 | 2.4782593  | 3.704063   | 5.01887    |            |                |
| DM10695P1 | 0.03511835 | 1.0024265  | 1.0796974  | 1.2166786  |            |                |
| DM08641P2 | 0.03518355 | 1.1322867  | 1.2208918  | 1.3788948  |            |                |
| DM08710P1 | 0.03520441 | 1.0460895  | 1.0359429  | 1.7788424  |            |                |
| DM07638P3 | 0.03520491 | -2.0162013 | -1.483049  | -2.9835012 |            |                |
| DM05630P1 | 0.03521562 | 1.1898757  | 1.1254202  | -1.176373  |            |                |
| DM11729P3 | 0.03530892 | -1.001582  | -1.0045625 | -1.2315519 |            |                |
| DM01774P1 | 0.03532026 | -1.1787865 | 1.2043628  | -1.2008545 |            |                |
| DM03711P3 | 0.03533742 | 1.0068944  | -1.0320364 | -1.2363559 |            |                |
| DM03029P4 | 0.0353826  | -2.354747  | -1.8247856 | -4.067462  |            |                |
| DM10733P4 | 0.03538437 | -1.012145  | 1.2321608  | -1.136319  |            |                |
| DM07072P2 | 0.03539234 | 1.4420475  | 1.2906367  | 1.2157174  | CIMG_08288 | XM_001241124.1 |
| DM15279P1 | 0.03540412 | 1.0135069  | 1.058442   | 1.3375543  |            |                |
| DM00871P2 | 0.03541947 | -1.0357976 | -1.0938174 | -1.2374448 | FDH        | XM_393266.2    |
| DM03994P1 | 0.03544778 | 1.1270005  | -1.0061107 | -1.3547539 |            |                |
| DM00190P2 | 0.03547768 | 1.2578088  | -1.1670371 | -1.0578858 | FBN2B      | NM_001135790.1 |

|           |            |            |            |            |             |                |
|-----------|------------|------------|------------|------------|-------------|----------------|
| DM07375P1 | 0.0355037  | -1.0646921 | -1.1438575 | -1.1236318 |             |                |
| DM11980P2 | 0.03550502 | -1.2182074 | -1.105413  | -1.2137594 |             |                |
| DM05170P1 | 0.03554269 | 1.0848578  | 1.129641   | 1.270503   |             |                |
| DM15271P2 | 0.03555173 | -1.2131562 | -1.1010989 | -1.1601568 |             |                |
| DM15015P2 | 0.03558963 | -1.2104688 | 1.0055407  | -1.0334499 |             |                |
| DM10677P1 | 0.03563311 | -1.1857582 | -1.0296926 | -1.1563481 |             |                |
| DM00289P1 | 0.03568845 | 1.3178946  | 1.4538312  | 1.3275206  | LOC658754   | XM_965116.2    |
| DM09905P2 | 0.03571146 | -1.0945783 | 1.2182065  | 1.4212476  |             |                |
| DM02364P1 | 0.035754   | 1.1926901  | -1.0615056 | -1.2028008 | LOC760262   | XM_001187593.1 |
| DM12584P1 | 0.03581544 | -1.1721963 | -1.1577969 | -1.2702287 |             |                |
| DM00728P1 | 0.03588571 | 1.0453771  | 1.0644035  | -1.1372671 | RHBDD1      | XM_001865677.1 |
| DM09904P4 | 0.03603455 | 1.1022184  | -1.0237614 | 1.1802876  |             |                |
| DM04348P3 | 0.03605359 | 1.0645683  | 1.039226   | -1.1861476 | LOC551451   | XM_623843.2    |
| DM02597P3 | 0.03608923 | -1.1021312 | -1.500463  | 1.1283089  |             |                |
| DM14141P1 | 0.03610631 | 1.0099175  | -1.0918728 | 1.3135344  |             |                |
| DM03088P3 | 0.03613777 | 1.2246977  | 1.2112992  | -1.0224566 | DGRI\GH200  | XM_001987316.1 |
| DM00911P1 | 0.03615691 | -1.0253655 | -1.0361071 | -1.419933  | DMOJ\GI219  | XM_002003541.1 |
| DM09503P1 | 0.03619466 | 1.0262697  | 1.1184877  | -1.2947701 |             |                |
| DM05015P4 | 0.0361998  | -1.1014589 | 1.0781778  | -1.1978626 | PRKRIP1     | NM_001161897.1 |
| DM04854P3 | 0.03628936 | 1.0100915  | 1.2094228  | 1.1240146  |             |                |
| DM01230P1 | 0.03634863 | 1.1854167  | 1.4418186  | 1.4373344  |             |                |
| DM09265P2 | 0.03641385 | 1.04928    | -1.7241898 | -1.1050196 |             |                |
| DM11205P4 | 0.03645669 | 1.0280474  | 1.2358599  | -1.2406559 | DPH2        | XM_001650846.1 |
| DM11840P3 | 0.03648004 | 1.0579771  | -1.0512203 | -1.1480427 |             |                |
| DM07113P4 | 0.03648229 | 1.0985665  | 1.0226964  | 1.2300054  |             |                |
| DM04300P2 | 0.03648844 | -1.2585446 | -1.2288419 | -1.3040165 |             |                |
| DM05030P3 | 0.03649491 | -1.0799338 | -1.1512592 | -1.167809  |             |                |
| DM01137P3 | 0.03654448 | 1.0672781  | 1.1817874  | 1.1461394  | DSIM\GD198  | XM_002102333.1 |
| DM03194P4 | 0.03659941 | -1.0059793 | 1.0095775  | -1.1279056 |             |                |
| DM08933P1 | 0.03659987 | -1.0913604 | -1.2035853 | -1.0918791 |             |                |
| DM05507P1 | 0.03661981 | 1.1899012  | 1.2213874  | 1.2111129  | DGRI\GH211  | XM_001985933.1 |
| DM10272P3 | 0.03662017 | 1.3224374  | 1.2923657  | 1.4213781  |             |                |
| DM13989P1 | 0.03662115 | 1.1200005  | 1.2799541  | 1.6249716  | AAEL_AAEL0C | XM_001653715.1 |
| DM04000P3 | 0.03663506 | 1.0429564  | 1.1094847  | -1.1762427 |             |                |
| DM09902P3 | 0.03664708 | -1.1419164 | 1.1714898  | 1.0559022  |             |                |
| DM10131P3 | 0.03667051 | 1.1945753  | 1.101515   | -1.1676497 |             |                |
| DM15022P3 | 0.03669116 | -1.1257482 | -1.0018145 | 1.1422004  |             |                |
| DM05646P1 | 0.03672123 | -1.0151165 | -1.0292552 | 1.0736384  | ISCW_ISCWC  | XM_002414813.1 |
| DM08823P2 | 0.03674529 | 1.044835   | 1.1096644  | -1.1698812 |             |                |
| DM05297P2 | 0.03679466 | 1.1611092  | -1.4025325 | -1.0286828 |             |                |
| DM12520P1 | 0.03681038 | 1.0022588  | -1.0429869 | -1.2582053 |             |                |
| DM14488P1 | 0.03685675 | -1.2449776 | 1.078896   | -1.5532905 |             |                |
| DM08715P1 | 0.03692449 | -1.2842481 | -1.4660845 | 1.1367198  |             |                |
| DM05110P1 | 0.03699996 | -1.2192745 | -1.148061  | -1.5948073 |             |                |
| DM08717P2 | 0.03705439 | -1.0285109 | 1.0984365  | 1.3962231  |             |                |
| DM14272P1 | 0.03707259 | 1.7406068  | 1.8838996  | -1.0515485 | YALIOB19382 | XM_501096.1    |
| DM07253P2 | 0.03712048 | -1.078743  | -1.0032316 | -1.2249743 |             |                |
| DM05782P3 | 0.03716631 | 1.5027289  | 1.425375   | 1.3637879  |             |                |
| DM04724P1 | 0.03717867 | 1.0333673  | -1.0920528 | -1.4675627 |             |                |
| DM05516P1 | 0.03725019 | 1.0723213  | -1.0784451 | 1.9303002  |             |                |

|           |            |            |            |            |              |                |
|-----------|------------|------------|------------|------------|--------------|----------------|
| DM08243P1 | 0.03729298 | 1.2272965  | 1.2256696  | 1.5249678  |              |                |
| DM06621P4 | 0.03734398 | -1.138691  | -1.261649  | -1.4597744 |              |                |
| DM10412P2 | 0.03734752 | 1.1136776  | 1.21062    | 1.0414286  |              |                |
| DM10459P3 | 0.03736275 | -1.6918049 | -1.0439928 | -1.2797985 |              |                |
| DM05488P1 | 0.03737442 | -1.0850271 | 1.0179206  | -1.3014691 |              |                |
| DM00991P1 | 0.03738163 | -1.3430843 | -1.2100728 | 1.1631856  | LOC656585    | XM_963106.1    |
| DM02683P2 | 0.0373823  | 1.1403531  | 1.1406817  | -1.0860825 | LOC409299    | XM_392818.3    |
| DM13829P1 | 0.03738838 | -1.2895364 | -1.0745426 | -1.1150537 |              |                |
| DM01644P4 | 0.03740716 | -1.2156662 | -1.3380642 | 1.0223268  | AAEL_AAEL0C  | XM_001652809.1 |
| DM04148P2 | 0.03743518 | 1.1017654  | 1.1211762  | -1.1913967 | CPIPJ_CPIJOC | XM_001846926.1 |
| DM06238P1 | 0.03744772 | -1.1618164 | -1.051347  | -1.6342117 |              |                |
| DM05629P1 | 0.03745794 | -1.1620461 | -1.0013883 | 1.3541957  |              |                |
| DM02795P2 | 0.03745839 | 1.0045851  | -1.0055515 | -1.32957   | MEMO1        | NM_001004925.1 |
| DM11537P1 | 0.03747689 | -1.3137072 | 1.0560861  | -1.6972084 |              |                |
| DM05780P1 | 0.03748432 | -1.0853301 | -1.0274767 | -1.305809  |              |                |
| DM12622P1 | 0.03749003 | 1.08254    | 1.1784569  | 1.2327133  |              |                |
| DM12341P1 | 0.03753841 | 3.6904416  | 4.814336   | 1.5844015  |              |                |
| DM09624P3 | 0.03753935 | 1.1100163  | 1.282953   | 1.2918969  |              |                |
| DM01522P4 | 0.03754124 | -1.0454532 | -1.0133111 | -1.1714576 | LOC1000785   | XM_001509554.1 |
| DM08958P1 | 0.03755837 | 1.1640528  | 1.3679696  | 1.4151133  |              |                |
| DM07430P1 | 0.03758083 | -1.4634349 | 1.1880056  | -3.9070768 |              |                |
| DM10980P3 | 0.03761059 | 1.1112235  | 1.0751642  | -1.3805492 |              |                |
| DM09295P2 | 0.03768209 | 1.1321825  | -1.1079928 | -1.1812702 |              |                |
| DM09099P3 | 0.0377309  | 1.1961502  | -1.3392386 | -1.0309103 |              |                |
| DM05417P2 | 0.03775309 | 1.3843291  | 1.1222574  | 1.23762    |              |                |
| DM03615P3 | 0.037759   | 1.1540296  | -1.0690296 | -1.2515178 | LOC1001643   | XM_001952310.1 |
| DM08847P2 | 0.03776301 | -1.1090587 | 1.1124235  | -1.4068373 |              |                |
| DM03726P1 | 0.03780418 | 1.0635954  | 1.0247103  | -1.4089129 |              |                |
| DM03735P1 | 0.03790471 | -1.0969521 | -1.2663916 | -1.0720383 | COPB1        | XM_001504942.1 |
| DM07210P4 | 0.03790717 | -1.0004529 | -1.2789544 | 1.3778505  |              |                |
| DM04314P1 | 0.03790815 | 1.0330161  | 1.2204212  | -1.1165272 | DSEC\GM138   | XM_002035440.1 |
| DM11993P3 | 0.03793329 | -1.0588679 | 1.001      | -1.2238052 |              |                |
| DM01860P4 | 0.03796681 | 1.1943092  | 1.1896056  | -1.6760583 | ISCW_ISCWC   | XM_002406272.1 |
| DM10315P2 | 0.0379896  | 1.4964594  | 1.9211638  | 1.3727885  |              |                |
| DM11104P2 | 0.03799274 | 1.4703162  | 1.2581435  | 1.1016178  |              |                |
| DM03533P1 | 0.03799675 | -1.106747  | -1.0383561 | -1.2769071 |              |                |
| DM00827P2 | 0.03800241 | -1.101143  | -1.3446499 | -1.3476366 | KDELR2       | XM_856379.1    |
| DM06678P3 | 0.03800435 | -1.1947241 | 1.353888   | 1.1672106  |              |                |
| DM11651P1 | 0.03800695 | -1.0916313 | 1.0835974  | -1.8055168 |              |                |
| DM03995P2 | 0.03807968 | 1.0934341  | -1.0953319 | -1.0803931 | SI:DKEY-204  | NM_001044952.1 |
| DM00824P2 | 0.03810639 | -1.0573823 | -1.3772056 | 1.0593832  | ACLY         | XM_856258.1    |
| DM10871P1 | 0.03810772 | 1.1268094  | 1.1390196  | 1.082872   | TVAG_09003   | XM_001314393.1 |
| DM04441P1 | 0.03811671 | 1.2223073  | 1.2563937  | -1.1141722 |              |                |
| DM04523P3 | 0.03815105 | 1.1226962  | -1.3695755 | 1.2070681  | DSEC\GM160   | XM_002040087.1 |
| DM08071P1 | 0.03815986 | -1.1473769 | 1.2063409  | 1.495448   |              |                |
| DM11376P3 | 0.03816062 | 1.1452765  | 1.0602461  | -1.2676606 |              |                |
| DM14786P1 | 0.03816216 | -1.2523534 | -1.0349206 | 1.2291738  |              |                |
| DM08078P1 | 0.03817328 | -1.017611  | 1.1228579  | 1.007893   |              |                |
| DM03579P1 | 0.03820245 | 1.4114938  | 1.2551672  | 1.2257893  |              |                |
| DM11178P2 | 0.03823426 | -1.1063753 | -1.010689  | -1.3590826 |              |                |

|           |            |            |            |            |              |                |
|-----------|------------|------------|------------|------------|--------------|----------------|
| DM10025P2 | 0.03827534 | -1.0969172 | 1.0933307  | 1.5199378  |              |                |
| DM02667P2 | 0.038312   | 1.2465101  | 1.1050415  | 1.0948467  |              |                |
| DM11766P2 | 0.03831754 | -1.100205  | -1.0463438 | -1.3359556 | LOC1000582   | XM_001917933.1 |
| DM00240P2 | 0.03834935 | 1.1298549  | 1.0823408  | 1.3082529  | DPER\GL1534  | XM_002020546.1 |
| DM10675P2 | 0.03835678 | -1.0689086 | 1.0592675  | -1.2239063 |              |                |
| DM00971P1 | 0.03835788 | -1.0068011 | 1.0494908  | -1.2725427 |              |                |
| DM06649P1 | 0.03845625 | -1.0212603 | -1.037286  | 1.3192039  |              |                |
| DM04277P1 | 0.03850029 | 1.015581   | 1.245526   | 1.3147905  |              |                |
| DM08590P3 | 0.03852641 | -1.3330815 | -1.0824664 | 1.0004703  |              |                |
| DM09594P2 | 0.03855373 | -1.107848  | 1.0424612  | 1.0963066  |              |                |
| DM12735P3 | 0.03857781 | 1.5586454  | 1.9651573  | 1.5930957  |              |                |
| DM01974P2 | 0.0385938  | -1.0027992 | 1.1033071  | -1.2325766 | EIF4A3       | NM_001113877.1 |
| DM02320P3 | 0.03860382 | -1.2089076 | 1.0972558  | 1.036623   | NIP7         | NM_001093060.1 |
| DM04386P2 | 0.03861829 | 1.1680952  | 1.083519   | -1.1074442 |              |                |
| DM00084P3 | 0.03865068 | -1.1888089 | -1.7365948 | 1.946541   | TTHERM_005   | XM_001022424.2 |
| DM02223P1 | 0.03870176 | -1.1668681 | -1.0108936 | 1.2574954  | AGAP_AGAP0   | XM_316741.4    |
| DM10982P3 | 0.03871355 | 1.0053166  | 1.3206133  | 1.0715786  |              |                |
| DM10182P1 | 0.03878635 | -1.1107872 | 1.0554115  | 1.3131887  |              |                |
| DM12089P2 | 0.03883619 | 1.1708447  | -1.0712943 | 1.2162651  |              |                |
| DM14469P2 | 0.03887988 | 1.0134879  | -1.5150378 | -1.4945669 |              |                |
| DM00886P1 | 0.03889094 | 1.2549782  | -1.0151939 | 1.5644504  | DPSE\GA270   | XM_002137046.1 |
| DM03681P3 | 0.03893657 | -1.1376754 | 1.0335945  | -1.3759    |              |                |
| DM12503P2 | 0.0389447  | -1.1056004 | -1.1173702 | -1.3095162 |              |                |
| DM12722P1 | 0.03897451 | 1.3339636  | 1.6407663  | 1.259503   |              |                |
| DM07792P1 | 0.03901425 | -1.1365366 | 1.080069   | 1.2669703  |              |                |
| DM10967P1 | 0.03902899 | -1.0126942 | -1.1721799 | -1.0635879 |              |                |
| DM07303P2 | 0.03902953 | 1.2414738  | 1.3754011  | 1.6226777  |              |                |
| DM07283P4 | 0.03909112 | -1.1045622 | -1.02876   | -1.2563123 |              |                |
| DM01135P1 | 0.03909588 | -1.1943877 | -1.0816358 | -1.263451  | LOC1001630   | XM_001946462.1 |
| DM14675P1 | 0.03912809 | -1.0457277 | -1.1912291 | 1.1794844  |              |                |
| DM03445P2 | 0.03914364 | -1.2086934 | 1.0154241  | -1.4673606 | EFTUD2       | XM_001145387.1 |
| DM02700P2 | 0.03916984 | -1.0877341 | 1.045719   | -1.184098  | BRAFLDRAFT   | XM_002593584.1 |
| DM04579P3 | 0.03917901 | 2.3532062  | 5.249328   | 1.1221248  |              |                |
| DM04240P1 | 0.03922487 | -1.2056502 | 1.1157315  | 1.2020209  | BRAFLDRAFT   | XM_002611891.1 |
| DM11756P2 | 0.03926097 | -1.0842297 | -1.0475537 | -1.2332143 |              |                |
| DM05813P4 | 0.03926843 | -1.216178  | -1.2776111 | 1.1259334  | DPSE\GA102   | XM_001352745.2 |
| DM07193P2 | 0.03928622 | -1.1199002 | -1.3725263 | -1.1872592 |              |                |
| DM00149P2 | 0.0392934  | -1.2665747 | -1.0658518 | -1.3736165 | PHF5A        | XM_001896429.1 |
| DM11884P1 | 0.03930266 | -1.1342524 | -1.0517697 | 1.1209065  |              |                |
| DM09733P2 | 0.03931163 | 1.2623993  | 1.2916867  | 1.3035932  |              |                |
| DM02217P2 | 0.0393577  | -1.1348135 | -1.0052516 | -1.2699648 | LOC411936    | XM_395405.1    |
| DM08719P1 | 0.03940868 | 1.0467349  | 1.219946   | 1.0330166  |              |                |
| DM02414P3 | 0.03947841 | 1.142792   | 1.1596011  | 1.1692414  | CPIPJ_CPIJOC | XM_001847340.1 |
| DM01953P1 | 0.03948669 | -1.4267856 | -1.531639  | -1.5287867 | DWIL\GK159   | XM_002063921.1 |
| DM07078P1 | 0.03949747 | -1.2414857 | 1.0959455  | 1.245626   |              |                |
| DM06389P1 | 0.03963829 | -1.2489585 | -1.0381356 | -1.2862171 |              |                |
| DM00542P1 | 0.03971002 | -1.0860696 | -1.2542595 | -1.2127672 | COPA         | XM_536131.2    |
| DM03301P1 | 0.03972267 | -1.085128  | -1.0128719 | -1.1526914 | DVIR\GJ2412  | XM_002051945.1 |
| DM03100P2 | 0.03974282 | 1.018986   | -1.1609492 | -1.2035991 |              |                |
| DM05214P1 | 0.03978384 | -1.1094484 | -1.2654054 | -1.4644701 | LMN          | XM_001851435.1 |

|           |            |            |            |            |            |                |
|-----------|------------|------------|------------|------------|------------|----------------|
| DM06378P1 | 0.03985252 | -1.3712256 | -1.1492661 | 1.0866098  |            |                |
| DM13997P3 | 0.03990745 | -1.099871  | -1.1737725 | 1.1298578  |            |                |
| DM09090P1 | 0.03991546 | 1.1591314  | 1.1919001  | 1.3560681  |            |                |
| DM00351P1 | 0.03995756 | 1.0231975  | 1.0775567  | 1.1403202  | LOC1000311 | XM_001380432.1 |
| DM06703P2 | 0.03995765 | 1.0200018  | 1.0553558  | 1.4221768  |            |                |
| DM03676P2 | 0.0400245  | 1.0594463  | -1.1510712 | -1.3062865 | FARSA-B    | NM_001087382.1 |
| DM07723P4 | 0.04003766 | -1.2291584 | 1.5960613  | 1.6833184  |            |                |
| DM11447P2 | 0.04004756 | 1.0135293  | -1.0265216 | -1.2294172 |            |                |
| DM04842P2 | 0.04004938 | 1.0169668  | -1.0936497 | -1.2117646 |            |                |
| DM12363P3 | 0.04006093 | 1.6503851  | 2.0152612  | 1.5629648  | AT5G09345  | NR_023116.1    |
| DM01441P2 | 0.04008304 | 1.0986476  | 1.038482   | -1.1251892 |            |                |
| DM01285P1 | 0.04008509 | -1.2887288 | -1.2445803 | -1.0333384 | DMOJ\GI243 | XM_001999043.1 |
| DM01356P1 | 0.04011672 | 1.0397569  | -1.3614209 | -1.0420562 | VINC       | XR_014976.1    |
| DM07897P2 | 0.04014743 | -1.1977729 | 1.0064946  | 1.2148162  |            |                |
| DM02745P1 | 0.0401868  | 1.141668   | 1.0199689  | -1.3185259 | PAPSS1     | NM_011863.2    |
| DM00548P1 | 0.04021096 | -1.0121685 | -1.1667472 | -1.1447855 | LOC1001657 | XM_001950078.1 |
| DM03192P2 | 0.04021385 | -1.0482612 | 1.0796912  | -1.2596257 | POPTRDRAFT | XM_002316601.1 |
| DM03467P3 | 0.04023164 | -1.1186287 | -1.2494155 | -1.402332  | AGAP_AGAP0 | XM_318146.4    |
| DM02638P1 | 0.04023794 | 1.0032696  | 1.0539668  | 1.3001989  | DWIL\GK205 | XM_002068474.1 |
| DM13057P2 | 0.04025224 | -1.1569935 | 1.0113269  | 1.156354   |            |                |
| DM01791P2 | 0.04026914 | -1.0157531 | -1.0556948 | -1.1279721 | UBQ-1      | NM_171139.3    |
| DM12632P1 | 0.04027791 | -1.1333126 | -1.2183954 | -1.3982767 |            |                |
| DM07387P1 | 0.04029747 | 1.3211874  | 1.1329277  | -1.0614234 |            |                |
| DM13879P3 | 0.04030902 | -1.1713221 | 1.020489   | -1.8858123 |            |                |
| DM01405P1 | 0.04030919 | -1.065287  | 1.0216495  | -1.2373749 | LOC1001622 | XM_001949423.1 |
| DM02661P3 | 0.04032499 | 1.0552485  | -1.0907233 | -1.230265  | PPP1CB     | XM_515373.2    |
| DM14653P1 | 0.04035639 | -1.1147969 | 1.0088842  | 1.2300776  |            |                |
| DM08248P1 | 0.04038085 | 1.1451514  | -1.0048773 | 1.4579595  |            |                |
| DM01246P4 | 0.04040237 | 1.224595   | 1.1386641  | 1.0803715  |            |                |
| DM10884P2 | 0.04045753 | -1.1464851 | 1.169181   | -1.3465017 |            |                |
| DM01741P3 | 0.04047119 | 1.276615   | -1.1984224 | -1.4101442 | GLYP       | NM_001032048.1 |
| DM14079P3 | 0.04047923 | -1.11681   | 1.0125767  | 1.1576346  |            |                |
| DM15185P1 | 0.04048482 | 1.314367   | 1.1610945  | 1.0160874  |            |                |
| DM10198P2 | 0.04048884 | -1.2293218 | 1.0089519  | -1.2527257 |            |                |
| DM00332P2 | 0.0405446  | 1.0893518  | 1.0944998  | -1.2080339 | LOC1002217 | XM_002196581.1 |
| DM05716P1 | 0.04056592 | -1.1419895 | -1.3513303 | 1.3530174  | LOC1000911 | XM_001520036.1 |
| DM06802P2 | 0.04056607 | -1.0592338 | 1.0551383  | -1.9444306 |            |                |
| DM15105P3 | 0.04056726 | -1.1201895 | -1.0539863 | 1.1333493  |            |                |
| DM13590P2 | 0.04057923 | -1.5301468 | 1.2400849  | 1.5172303  |            |                |
| DM01001P4 | 0.04060762 | -1.1463203 | -1.2117428 | -1.4095753 | DANA\GF207 | XM_001964287.1 |
| DM14009P1 | 0.04061504 | 1.1067461  | 1.1558985  | -1.0423837 |            |                |
| DM05306P1 | 0.04065506 | 1.0738217  | 1.8500376  | 1.5583516  |            |                |
| DM06837P1 | 0.04067225 | -1.124897  | -1.0820616 | 1.1852229  | LOC663893  | XM_971144.2    |
| DM06149P3 | 0.04071172 | -1.0755138 | -1.1030806 | -1.3651345 | DER-1      | XM_001901009.1 |
| DM14065P1 | 0.04072447 | -1.4985918 | -1.6562878 | -1.4933275 |            |                |
| DM13612P1 | 0.04082459 | -1.0278312 | -1.4440949 | -1.1582651 | BRAFLDRAFT | XM_002595567.1 |
| DM12665P2 | 0.04082739 | -1.0444219 | 1.122402   | 1.24623    |            |                |
| DM02447P1 | 0.0408385  | -1.0990382 | 1.0260954  | 1.1766034  | LOC1000711 | XM_001494208.2 |
| DM02389P1 | 0.04086491 | 1.0996503  | 1.1700609  | 1.2780483  | LOC692984  | NM_001046821.1 |
| DM12062P3 | 0.04086532 | 1.2538131  | 1.2547864  | 1.3558482  |            |                |



|           |            |            |            |            |              |                |
|-----------|------------|------------|------------|------------|--------------|----------------|
| DM14513P2 | 0.0409969  | -1.0125684 | 1.0257056  | 1.2928791  |              |                |
| DM09227P3 | 0.04099809 | 1.0455945  | 1.2314652  | 1.1027035  |              |                |
| DM02533P1 | 0.04103374 | 1.2135699  | 1.1806077  | 1.6327537  | MHC          | NM_001169521.1 |
| DM02380P3 | 0.04107016 | 1.1530149  | -1.0011394 | -1.2905501 | LOC661810    | XM_967949.2    |
| DM01485P2 | 0.04108518 | -1.1287642 | -1.1394858 | 1.0433162  |              |                |
| DM04549P4 | 0.04112664 | -1.0480889 | 1.1545843  | 1.3448117  | TGME49_009   | XM_002369661.1 |
| DM05770P1 | 0.0411688  | -1.1631279 | -1.1684238 | 1.0843205  |              |                |
| DM05933P2 | 0.04119415 | -1.0056583 | 1.0478021  | -1.213322  | LOC1000323   | XM_001381368.1 |
| DM02767P1 | 0.04127627 | -1.1599404 | -1.1578432 | -1.4155275 | PSMD1        | NM_001092985.1 |
| DM12008P4 | 0.04135967 | 1.1455429  | 1.0620496  | -1.071144  | LOC1002212   | XM_002192179.1 |
| DM04946P2 | 0.04136494 | 1.0623679  | -1.3159128 | -1.0406295 |              |                |
| DM04443P2 | 0.04137858 | -1.2108793 | -1.2883155 | 1.1032896  | LOC657826    | XM_964261.2    |
| DM09885P3 | 0.04143465 | 1.1967406  | 1.072305   | -1.5738869 |              |                |
| DM05636P3 | 0.0414646  | -1.2183088 | -1.1472371 | 1.2887924  |              |                |
| DM10818P2 | 0.04148328 | 1.0944998  | 1.0733234  | 1.4187673  |              |                |
| DM14172P3 | 0.04150273 | -1.2091396 | 1.0875041  | -1.4969693 |              |                |
| DM03390P3 | 0.04153209 | 1.0773886  | -1.1296849 | 1.2433485  | CPIPJ_CPIJ01 | XM_001864142.1 |
| DM02968P2 | 0.04154164 | -1.1290561 | -1.1702954 | -1.2470628 | DSEC\GM204   | XM_002033412.1 |
| DM10639P2 | 0.0415742  | 1.1175061  | 1.0297675  | -1.1514926 |              |                |
| DM09612P1 | 0.04159223 | -1.1224159 | 1.1556734  | -1.158893  |              |                |
| DM12714P1 | 0.04161953 | 1.0012634  | -1.0891062 | -2.1525233 |              |                |
| DM03775P1 | 0.04165027 | -1.5271661 | -1.09038   | 1.3814008  |              |                |
| DM12383P3 | 0.04166738 | 1.5340389  | 1.8181136  | 1.5505297  |              |                |
| DM05093P1 | 0.04169142 | 1.2278076  | 1.3365624  | 1.2847481  |              |                |
| DM02306P2 | 0.0416976  | -1.181008  | -1.1348631 | 1.0506011  | CLC          | XM_395065.3    |
| DM04239P2 | 0.04173142 | -1.255316  | -1.1191125 | -1.5001951 |              |                |
| DM06612P1 | 0.0417465  | 1.0274332  | 1.8310834  | 1.6668636  | PGUG_02331   | XM_001484552.1 |
| DM09144P1 | 0.04179396 | -1.0933981 | 1.1219224  | 1.3519888  |              |                |
| DM02928P1 | 0.04184179 | -1.0360514 | -1.0364006 | 1.6826556  |              |                |
| DM00352P2 | 0.04184417 | -1.0382179 | -1.0472213 | -1.4270705 | LOC1001211   | XM_001604651.1 |
| DM05793P4 | 0.04185    | -1.0509957 | -1.2354457 | 1.4359323  |              |                |
| DM09649P1 | 0.04185228 | 1.1152426  | 1.2225971  | -1.0688416 |              |                |
| DM07108P3 | 0.04186904 | 1.02421    | -1.891568  | -9.319117  |              |                |
| DM12812P1 | 0.04193846 | 3.485015   | 5.441798   | 1.7377107  |              |                |
| DM02337P1 | 0.04196262 | 1.1305348  | 1.1467403  | -1.3963524 |              |                |
| DM03124P3 | 0.04197601 | -1.0936613 | -1.1026235 | -1.2750005 | TRIADDRAFT   | XM_002117259.1 |
| DM08210P3 | 0.04197689 | 1.2423323  | 1.163314   | 1.3323635  |              |                |
| DM02654P2 | 0.04201514 | -1.2011827 | -1.0442997 | -1.3658004 | BRAFLDRAFT   | XM_002595646.1 |
| DM13678P1 | 0.04207315 | -1.1777872 | -1.1322749 | 1.1862261  | LOC1001649   | XM_001947405.1 |
| DM14602P2 | 0.04211954 | -1.0402329 | 1.0965116  | -1.2352601 |              |                |
| DM10183P1 | 0.04213649 | -1.21045   | 1.0846794  | -1.2576079 |              |                |
| DM13908P3 | 0.04214178 | 1.0316303  | 1.2437677  | 1.2002678  |              |                |
| DM07417P2 | 0.04214422 | 1.0344713  | 1.0178659  | 1.7405514  |              |                |
| DM01641P2 | 0.04217755 | -1.0797012 | -1.0628465 | -1.1706429 | LOC1001150   | XM_001607930.1 |
| DM12239P1 | 0.04222523 | -1.041762  | 1.0963156  | 1.1735765  |              |                |
| DM04435P1 | 0.04222962 | 1.1616253  | -1.1326256 | 1.3197385  |              |                |
| DM04834P2 | 0.04225613 | 1.3519521  | 1.1575273  | 1.0319302  |              |                |
| DM13900P3 | 0.04226634 | -1.193994  | -1.05638   | -1.72669   |              |                |
| DM08810P1 | 0.04227996 | -1.276039  | -1.4731957 | -1.6144382 |              |                |
| DM04745P3 | 0.04232802 | -1.246635  | -1.0353934 | 1.0992652  |              |                |

|           |            |            |            |            |                             |
|-----------|------------|------------|------------|------------|-----------------------------|
| DM11888P3 | 0.04236844 | 1.2330512  | 1.3248717  | -1.0554109 |                             |
| DM09974P3 | 0.04239352 | 1.0358965  | 1.2015613  | -1.0652325 |                             |
| DM15039P2 | 0.04239447 | -1.2838911 | 1.2540218  | -1.0148914 |                             |
| DM08103P2 | 0.04244218 | 1.0527775  | 1.2099124  | 1.3185427  |                             |
| DM09929P1 | 0.0424876  | 1.4471428  | 1.7227031  | 1.1073837  |                             |
| DM05063P3 | 0.04250675 | 1.0663204  | -1.9177197 | 1.019687   |                             |
| DM04635P1 | 0.04251397 | -1.108123  | -1.33058   | -1.2696474 |                             |
| DM09400P3 | 0.04260502 | 1.0257919  | 1.2264311  | 1.362929   |                             |
| DM07499P1 | 0.04264496 | -1.4360435 | -1.3651825 | -1.271245  |                             |
| DM14597P3 | 0.04270382 | 1.0820223  | -1.2650911 | 1.3872294  |                             |
| DM09754P1 | 0.04281338 | -1.2855636 | 1.0608404  | 1.0645591  |                             |
| DM04028P1 | 0.04281409 | -1.0021688 | 1.0381624  | 1.4101696  |                             |
| DM13942P1 | 0.04282153 | -1.252509  | -1.0440519 | -1.1481613 |                             |
| DM15013P3 | 0.04282655 | -1.105944  | 1.0027502  | 1.0920691  |                             |
| DM10532P2 | 0.04284783 | -1.2265986 | 1.0397757  | -1.2400272 |                             |
| DM13619P2 | 0.04287439 | -1.0414301 | 1.1717023  | 1.3471836  |                             |
| DM01823P3 | 0.04296587 | -1.0658975 | 1.0627906  | -1.1179596 | CPIPJ_CPIJ01 XM_001862577.1 |
| DM14508P2 | 0.04298752 | -1.0979797 | -1.4949894 | 1.1102912  |                             |
| DM05589P1 | 0.04299079 | -1.0516961 | -1.0928195 | -1.2753112 |                             |
| DM04833P4 | 0.04299094 | 1.0832565  | -1.1873097 | 1.0303301  |                             |
| DM07137P3 | 0.04304304 | 1.6264303  | 2.396952   | -1.4000133 |                             |
| DM06979P1 | 0.0430621  | 2.3107455  | 5.0164924  | 1.1061159  |                             |
| DM07791P3 | 0.04309909 | -1.3464981 | -1.0908531 | -1.2638197 |                             |
| DM02438P3 | 0.04311162 | 1.1172178  | -1.017462  | -1.245405  | DMOJ\GI235 XM_001998534.1   |
| DM02396P1 | 0.04311452 | 1.0566891  | -1.0612755 | 1.1272506  | LOC1000261 XM_001376807.1   |
| DM03430P1 | 0.04312098 | -1.0131301 | -1.19437   | 1.4826828  | LOC1000117 XM_001362929.1   |
| DM12715P1 | 0.04313717 | -1.1107537 | -1.160468  | -1.1795701 |                             |
| DM09269P2 | 0.04316142 | 1.1225076  | 1.126219   | -1.2117572 |                             |
| DM14460P2 | 0.04323703 | 1.1461557  | -1.0247554 | -1.0533319 |                             |
| DM00522P1 | 0.04325676 | 1.4116849  | 1.235365   | 1.2148651  |                             |
| DM11926P2 | 0.04327261 | -1.1546563 | -1.2336229 | -1.1864929 |                             |
| DM13488P2 | 0.04332804 | -1.5277327 | 1.2537217  | 1.0847596  |                             |
| DM07343P2 | 0.04336453 | 1.3704399  | -1.5132011 | -4.602392  |                             |
| DM02290P2 | 0.04343232 | -1.0251119 | -1.2170564 | 1.1171993  |                             |
| DM12613P1 | 0.04354694 | -1.1117568 | -1.1423724 | -1.1268581 |                             |
| DM11374P2 | 0.04358601 | 1.0390358  | -1.0140812 | 1.2534031  |                             |
| DM04527P2 | 0.0436338  | 1.0515416  | -1.0314277 | -1.2021505 |                             |
| DM09150P3 | 0.04365094 | 1.2392488  | 1.2918823  | 1.6999485  |                             |
| DM11556P1 | 0.04366354 | -1.0625975 | 1.1647058  | -1.1452327 | MAN1B1 XM_415569.2          |
| DM12247P3 | 0.0436975  | -1.0099765 | 1.0146502  | 1.198548   |                             |
| DM08798P4 | 0.04370368 | -1.0053605 | -1.437547  | 1.0818126  |                             |
| DM12024P2 | 0.04372623 | -1.056457  | -1.2760766 | -1.1571938 |                             |
| DM11343P1 | 0.04373166 | 1.1167924  | 1.0269332  | -1.0521393 |                             |
| DM00712P1 | 0.04376414 | -1.041574  | 1.0203834  | -1.2265567 | DANA\GF165 XM_001954753.1   |
| DM08109P1 | 0.04378609 | -1.1137214 | 1.2578777  | 1.9619106  |                             |
| DM11352P3 | 0.04378752 | -1.3481785 | -1.0947946 | -1.4101928 |                             |
| DM01613P4 | 0.04380748 | 1.1028241  | 1.6905452  | 1.2121861  | DSIM\GD140 XM_002083947.1   |
| DM13766P1 | 0.0438218  | -1.2656742 | -1.0391637 | 1.0963186  |                             |
| DM09479P1 | 0.04382898 | 1.1468706  | -1.4119182 | -1.254822  |                             |
| DM06216P1 | 0.04383625 | -1.1365252 | -1.1217164 | -1.0385672 |                             |

|           |            |            |            |            |             |                |
|-----------|------------|------------|------------|------------|-------------|----------------|
| DM07065P3 | 0.04384631 | -1.2728846 | 1.1954312  | 1.1557577  |             |                |
| DM11940P2 | 0.04385188 | -1.1378893 | 1.0722708  | -1.1964003 |             |                |
| DM08250P2 | 0.04388785 | 1.0428343  | 1.2917879  | 1.2456856  |             |                |
| DM01529P2 | 0.0439375  | -1.1874171 | -1.5592277 | -1.2375494 | DPER\GL2262 | XM_002024692.1 |
| DM09264P3 | 0.04395192 | 1.0662662  | -1.1259569 | -1.4554162 |             |                |
| DM00023P4 | 0.04395208 | -1.0520715 | 1.0726634  | -1.2172612 | BETATUB56D  | XM_002091745.1 |
| DM07960P2 | 0.04398578 | 1.0447011  | 1.0657334  | 1.3790957  |             |                |
| DM02861P3 | 0.0440031  | -1.1777401 | -1.3592039 | -1.4866673 | INX         | XM_001649705.1 |
| DM03641P1 | 0.04403359 | 1.1212525  | 1.2965827  | 1.4480449  |             |                |
| DM01458P1 | 0.04405781 | -1.0125992 | -1.0802299 | -1.1822999 | LOC1001152  | XM_001599958.1 |
| DM07381P4 | 0.04406413 | 1.060733   | 1.1276634  | -2.0414202 |             |                |
| DM09494P4 | 0.04406785 | -1.40212   | 1.3263094  | -1.1852006 |             |                |
| DM08668P1 | 0.04409946 | 1.0789841  | -1.1146014 | -1.2222964 |             |                |
| DM02162P3 | 0.04413198 | 1.1070148  | 1.298432   | 1.2945404  |             |                |
| DM06831P2 | 0.04413749 | 1.0056849  | -1.0501561 | -1.4886249 |             |                |
| DM04125P2 | 0.04414257 | -1.5062256 | -1.4449015 | -1.4107337 | LOC412111   | XM_395577.3    |
| DM10401P1 | 0.04414416 | 1.0014516  | 1.0356838  | 1.2948837  |             |                |
| DM14082P1 | 0.04415895 | -1.1845249 | 1.0718745  | -1.3429159 |             |                |
| DM02454P2 | 0.04416436 | -1.0780385 | -1.0373592 | 1.2632684  | LOC1001748  | NM_001130902.1 |
| DM01424P3 | 0.04418047 | 1.095461   | -1.0909746 | -1.3447223 |             |                |
| DM07874P3 | 0.04418066 | -1.2722206 | 1.0524155  | -1.8996942 |             |                |
| DM01910P1 | 0.04420648 | -1.076509  | -1.1443554 | -1.2011248 | AAEL_AAEL01 | XM_001650178.1 |
| DM12944P3 | 0.04421511 | -1.3644006 | -1.2823362 | -1.4760206 |             |                |
| DM01944P3 | 0.04422995 | -1.222085  | -1.1470102 | -1.3039023 | CCT7        | NM_001142855.1 |
| DM03455P3 | 0.04423983 | 1.0154204  | 1.0944532  | -1.0916581 |             |                |
| DM13218P4 | 0.04425733 | 1.3184004  | 1.3798709  | 1.4384196  |             |                |
| DM10586P4 | 0.04426759 | -1.10497   | -1.3283232 | 1.08085    |             |                |
| DM12452P2 | 0.04430197 | 1.1761982  | -1.0009537 | -1.1007969 |             |                |
| DM04906P2 | 0.04433111 | 1.2018784  | -1.4168047 | -1.0649091 |             |                |
| DM13359P1 | 0.04437639 | 3.1248488  | 4.328061   | 1.869525   |             |                |
| DM06132P4 | 0.04439713 | 1.1003698  | -1.3358688 | -1.2253474 |             |                |
| DM11807P2 | 0.04440525 | -1.132059  | -1.032457  | -1.3175956 |             |                |
| DM11244P2 | 0.04449588 | 2.0719283  | 3.8935452  | 1.0876266  |             |                |
| DM06724P3 | 0.04450949 | 1.0153474  | 1.1035895  | 1.4635344  |             |                |
| DM04258P4 | 0.0445936  | -1.1793592 | -1.0157017 | -1.4440155 |             |                |
| DM04779P1 | 0.04461645 | 1.1311083  | -1.0177796 | 1.5725889  | MHC         | XM_002051957.1 |
| DM07794P1 | 0.04461725 | 1.1036237  | 1.2654011  | -1.1802169 |             |                |
| DM05868P4 | 0.04466062 | -1.1467416 | 1.1520637  | -1.042044  |             |                |
| DM00488P2 | 0.04474137 | 1.0037426  | -1.1068362 | -1.3883748 | LOC1000321  | XM_001381221.1 |
| DM13626P2 | 0.044748   | -1.2542007 | -1.281827  | 1.2236547  |             |                |
| DM01705P4 | 0.04475218 | 1.1729311  | 1.218597   | 1.1131561  | APLP2       | NM_001142276.1 |
| DM10970P1 | 0.04483493 | -1.0254494 | -1.057589  | -1.3116134 |             |                |
| DM12135P1 | 0.04483619 | 1.035703   | -1.0938313 | -1.2110503 |             |                |
| DM06425P3 | 0.04484293 | -1.0995748 | 1.0356834  | -1.2275531 | LOC1001216  | XM_001605224.1 |
| DM10273P3 | 0.04484985 | 1.0996296  | -1.0258213 | -1.1662396 |             |                |
| DM05426P3 | 0.04486788 | 1.0693357  | 1.1376497  | -1.1418341 |             |                |
| DM02200P2 | 0.04488297 | 1.0871406  | 1.3271626  | -1.0229381 | IMP3        | NM_001162610.1 |
| DM03578P2 | 0.04492924 | 1.1317176  | -1.2837447 | -2.1444902 |             |                |
| DM07740P1 | 0.04497901 | 1.025499   | 1.315217   | 1.0881033  |             |                |
| DM04493P2 | 0.04504458 | 1.2216605  | 1.2380476  | 1.0420824  |             |                |

|           |            |            |            |            |            |                |
|-----------|------------|------------|------------|------------|------------|----------------|
| DM04410P3 | 0.04504772 | 1.1380482  | 1.2562524  | 1.4687104  |            |                |
| DM10942P1 | 0.04505215 | -1.0756549 | -1.9080602 | -1.6074663 | EDI_287980 | XM_001739638.1 |
| DM02973P3 | 0.04505428 | -1.0349135 | -1.212634  | -1.2579454 |            |                |
| DM09602P4 | 0.04509546 | -1.1156269 | 1.0058564  | -1.1984936 |            |                |
| DM10115P3 | 0.04515092 | 1.3178073  | 1.504868   | 1.404301   |            |                |
| DM02773P4 | 0.04518166 | -1.1953069 | -1.0930678 | -1.2406995 | SKP1       | XM_969431.2    |
| DM01158P3 | 0.04522333 | 1.1138856  | 1.2637478  | -1.0246013 |            |                |
| DM11754P1 | 0.04524449 | 1.2303665  | 1.4120663  | 1.0156676  | PVX_101370 | XM_001613971.1 |
| DM10461P3 | 0.04525336 | -1.1501693 | 1.0214802  | 1.1006411  |            |                |
| DM04823P1 | 0.04525368 | -1.1229467 | -1.0190544 | -1.2440244 |            |                |
| DM07036P4 | 0.04539671 | -1.3457427 | -1.7687758 | -1.6165906 |            |                |
| DM14751P2 | 0.04549158 | 1.3350205  | 1.6763837  | 1.0306358  |            |                |
| DM00793P2 | 0.04550091 | 1.092822   | 1.0420346  | 1.6756552  | DERE\GG120 | XM_001981390.1 |
| DM00682P1 | 0.04557345 | 1.209637   | 1.0132537  | -1.1001967 |            |                |
| DM10382P3 | 0.04566808 | 1.3402846  | 1.3401878  | 1.3087039  | CTSL2      | NM_001004869.1 |
| DM02806P1 | 0.04567136 | -1.0480591 | -1.1946304 | -1.3338509 | DGRI\GH171 | XM_001985612.1 |
| DM04305P4 | 0.04568183 | -1.1955421 | -1.1373893 | 1.1560738  |            |                |
| DM07364P2 | 0.04568933 | 1.037731   | 1.0620618  | -1.2496893 |            |                |
| DM08817P3 | 0.04585147 | -1.1034642 | -1.1731462 | -1.3475223 |            |                |
| DM11543P2 | 0.04591597 | 1.2921199  | 1.8536298  | 1.0902349  |            |                |
| DM06861P1 | 0.04596079 | 1.1844058  | 1.1759576  | 1.2354659  |            |                |
| DM00074P4 | 0.04601317 | -1.1410738 | -1.1862562 | -1.2359343 | TBP-1      | NM_079740.3    |
| DM04699P3 | 0.04601745 | -1.1495913 | -1.0055816 | 1.755628   |            |                |
| DM00787P2 | 0.04603576 | -1.3252369 | -1.4482867 | -1.2607256 | HSP90B1    | XM_001662901.1 |
| DM03627P1 | 0.04605418 | -1.1964666 | 1.0593513  | -1.3551242 |            |                |
| DM02027P4 | 0.04610246 | 1.0338458  | 1.0944612  | -1.1373945 | MONBRDRAF  | XM_001748218.1 |
| DM10010P4 | 0.0461992  | -1.0627581 | -1.026731  | 1.2226532  |            |                |
| DM09359P1 | 0.04622319 | -1.1819    | -1.0870507 | 1.0901169  |            |                |
| DM02164P1 | 0.04627075 | 1.0197343  | -1.3793733 | 1.1101649  | DPER\GL212 | XM_002023167.1 |
| DM00982P1 | 0.0463174  | 1.0546073  | 1.1330698  | 1.3079369  | LOC1002062 | XR_053778.1    |
| DM04275P2 | 0.04635821 | -1.156692  | -1.0822102 | -1.3202202 |            |                |
| DM01461P3 | 0.04639309 | -1.1048877 | -1.0133106 | -1.2546797 | LOC551269  | XM_623661.2    |
| DM02081P3 | 0.04641438 | -1.1713768 | -1.2906797 | -1.3891526 | IMPDH1     | XM_001501587.2 |
| DM10192P1 | 0.04647194 | -1.1860234 | -1.17776   | -1.2925293 |            |                |
| DM01463P1 | 0.04651496 | 1.0232966  | -1.0829123 | -1.2867193 |            |                |
| DM06180P3 | 0.04652839 | 1.0439918  | 1.271674   | 1.591444   |            |                |
| DM10833P1 | 0.04655699 | 1.005691   | -1.1035097 | -1.3052638 |            |                |
| DM06827P3 | 0.0465643  | 1.1903582  | 1.267948   | 1.3851365  |            |                |
| DM11293P1 | 0.04656447 | 1.0348417  | -1.1313249 | -1.2070457 |            |                |
| DM08692P2 | 0.04657602 | 1.1733127  | 1.2159334  | 1.3991735  | DANA\GF178 | XM_001953665.1 |
| DM11052P2 | 0.04660713 | 1.1663839  | 1.7837564  | -1.4895749 |            |                |
| DM02832P2 | 0.04664586 | 1.5599406  | 1.938541   | 1.6099421  | TNNC       | XM_001652023.1 |
| DM08959P1 | 0.04665609 | -1.0577761 | -1.0828531 | 1.3004755  |            |                |
| DM08516P3 | 0.04665756 | -1.6069766 | 1.1526644  | 1.1292005  |            |                |
| DM12438P3 | 0.04666682 | 1.0848091  | 1.2139112  | 1.5100496  |            |                |
| DM12859P1 | 0.04668805 | -1.0622493 | -1.0211457 | -1.2366838 |            |                |
| DM03971P2 | 0.04669859 | -1.0396525 | -1.0469608 | 1.2749383  |            |                |
| DM06268P1 | 0.04675    | -1.0270354 | 1.0422386  | 1.2437191  |            |                |
| DM02439P3 | 0.04675621 | 1.1634005  | 1.4092664  | 1.3080693  | LOC592365  | XM_791891.1    |
| DM12230P4 | 0.04676743 | 1.0262139  | -1.0997045 | 1.289315   |            |                |

|            |            |            |            |            |             |                |
|------------|------------|------------|------------|------------|-------------|----------------|
| DM13621P3  | 0.0468041  | 1.2654793  | -1.3634845 | -1.1020238 |             |                |
| DM00520P2  | 0.04683046 | -1.1691632 | -1.0980754 | -1.510898  | MAGOH       | NM_001034245.1 |
| DM00666P1  | 0.04684677 | -1.0215263 | -1.1583152 | -1.177126  | AGAP_AGAP0  | XM_307546.2    |
| DM011116P1 | 0.04685376 | 1.0014247  | 1.0955812  | -1.0506608 | DVIR\GJ1258 | XM_002046256.1 |
| DM07403P3  | 0.04687838 | -1.1690146 | 1.3038688  | -1.1072031 |             |                |
| DM04797P2  | 0.04688835 | 1.8682163  | 1.8534329  | 1.6468751  |             |                |
| DM01673P2  | 0.04696971 | 1.1651192  | -1.0642039 | -1.0295277 | ZGC:123301  | NM_001037417.1 |
| DM12372P3  | 0.0469789  | 1.0858278  | 1.1656365  | -1.1134229 |             |                |
| DM10845P3  | 0.04701017 | -1.1083698 | -1.1658762 | -1.4026456 |             |                |
| DM10346P1  | 0.04701842 | -1.3438221 | 1.0340121  | 1.0283825  |             |                |
| DM02203P3  | 0.04703221 | -1.0885817 | -1.1645334 | -1.4557259 | LOC581865   | XM_001177805.1 |
| DM10086P3  | 0.04705113 | 1.5660177  | 1.1879408  | 1.947644   |             |                |
| DM06659P2  | 0.04708335 | 1.3320782  | 1.3169397  | 1.07109    |             |                |
| DM05889P1  | 0.04710552 | -1.1142195 | -1.0219647 | -1.2370625 | EEF1G       | XM_001661520.1 |
| DM11683P3  | 0.0471084  | -1.0234818 | 1.121458   | -1.3061019 |             |                |
| DM06728P1  | 0.04710931 | -1.3499081 | -1.292202  | 1.3047189  |             |                |
| DM12986P1  | 0.04712053 | -1.347351  | -1.357014  | -1.2441072 |             |                |
| DM00677P2  | 0.04716231 | -1.1026298 | -1.0405364 | -1.2477136 | LOC1001234  | XM_001606991.1 |
| DM07131P4  | 0.04720977 | -1.0502989 | -1.0456393 | -1.2197001 |             |                |
| DM02897P2  | 0.04721065 | -1.0658201 | -1.0394604 | -1.2615672 | DGRIV\GH208 | XM_001985844.1 |
| DM09488P2  | 0.04723509 | 1.1695518  | 1.033912   | -1.1131636 |             |                |
| DM09302P3  | 0.04729632 | 1.0934045  | -1.0552968 | -1.5461353 |             |                |
| DM01571P1  | 0.04732113 | 1.004491   | -1.1269305 | -1.1255982 | DPER\GL251  | XM_002021113.1 |
| DM06136P3  | 0.04735976 | 1.0893233  | -1.13325   | -1.1027267 |             |                |
| DM07204P1  | 0.04738986 | -1.0436593 | -1.159339  | -1.2546982 |             |                |
| DM11895P3  | 0.04739584 | 1.0539502  | -1.3256178 | -1.1721382 |             |                |
| DM01661P1  | 0.0474211  | 1.0581342  | -1.01118   | 1.2606668  | DERE\GG135  | XM_001972960.1 |
| DM06156P1  | 0.04747419 | 1.20118    | 1.4240838  | 1.1917797  |             |                |
| DM09038P2  | 0.04753017 | -1.2229698 | -1.1069953 | -1.2892482 |             |                |
| DM10156P1  | 0.04753799 | 1.2052356  | -1.2627591 | -1.2508332 |             |                |
| DM05274P1  | 0.04756812 | 1.8407863  | 2.1587832  | 1.8652544  |             |                |
| DM02848P2  | 0.04761765 | -1.0449042 | -1.065888  | -1.1788968 | DVIR\GJ1360 | XM_002047706.1 |
| DM08015P1  | 0.04762253 | 1.0325012  | -1.1035211 | 1.2413726  |             |                |
| DM11553P1  | 0.04762389 | 1.0187805  | -1.1706203 | -1.1989592 | DBT         | NM_001013515.1 |
| DM02543P2  | 0.04762992 | 1.1065978  | 1.3334509  | 1.368124   | CBSB        | NM_001014345.2 |
| DM00114P2  | 0.04769556 | -1.05168   | -1.1427374 | 1.0730885  | DVIR\GJ2411 | XM_002053833.1 |
| DM10756P3  | 0.04773648 | 1.0714401  | 1.1064731  | 1.1884931  |             |                |
| DM03457P1  | 0.04777066 | -1.0658888 | -1.1055474 | -1.2774361 |             |                |
| DM12324P3  | 0.04777083 | -1.0337065 | -1.3020086 | 1.0387406  |             |                |
| DM07887P1  | 0.04778837 | -1.1787722 | 1.0153844  | 1.1510206  |             |                |
| DM02434P1  | 0.04791232 | -1.0612245 | -1.3895366 | -1.1677941 | DMOJ\GI180  | XM_002003736.1 |
| DM04107P2  | 0.0479237  | -1.0547037 | 1.1648748  | 1.4200342  |             |                |
| DM12675P3  | 0.04795223 | 1.0985132  | -1.2665461 | 1.4725162  |             |                |
| DM02110P1  | 0.04802322 | -1.1393085 | -1.0368273 | 1.1131604  | LOC657887   | XM_964315.1    |
| DM00131P2  | 0.04802538 | 1.1277803  | 1.0590068  | -1.0476387 | CSNK1E      | NM_204377.2    |
| DM04673P2  | 0.04803439 | 1.0089461  | 1.0838648  | -1.1525378 |             |                |
| DM00024P2  | 0.04807801 | -1.3065331 | -1.0815488 | -1.2287278 | LOC578258   | XM_001196676.1 |
| DM06496P1  | 0.04808378 | 1.1555603  | -1.2871166 | 1.8212289  |             |                |
| DM14698P3  | 0.04809735 | -1.255656  | -1.2646573 | -1.2041621 | AAEL_AAEL0C | XM_001660319.1 |
| DM07453P4  | 0.04814239 | 1.2077272  | 1.3792905  | 1.4884903  | THAPSDRAFT  | XM_002285900.1 |

|           |            |            |            |            |             |                 |
|-----------|------------|------------|------------|------------|-------------|-----------------|
| DM03629P1 | 0.04816031 | -1.0789381 | 1.1373997  | -1.2672521 |             |                 |
| DM03329P1 | 0.04818441 | -1.1635541 | -1.1981461 | -1.3740612 |             |                 |
| DM03099P1 | 0.04824705 | -1.3619813 | -1.1160864 | -1.0212761 | LOC1000788: | XM_001509769.1  |
| DM06449P3 | 0.04831162 | -2.2870996 | -3.2544427 | -1.7731466 | POPTRDRAFT. | XM_002337327.1  |
| DM04276P2 | 0.04835051 | -1.1556817 | -1.2281128 | 1.4714386  | GSPATTO0030 | (XM_001427203.1 |
| DM09225P1 | 0.04837705 | -1.5671135 | -1.9164125 | -1.8769299 |             |                 |
| DM10043P1 | 0.04837722 | -1.1815898 | -1.0305413 | 1.2460365  |             |                 |
| DM04311P2 | 0.04840897 | 1.3152984  | -1.8579825 | 1.9433753  |             |                 |
| DM03904P2 | 0.04844128 | -1.2410331 | -1.3090974 | -1.7187792 |             |                 |
| DM13172P3 | 0.04845201 | 1.1480386  | -1.3907709 | 1.52272    |             |                 |
| DM00503P4 | 0.04848477 | -1.0350878 | -1.020948  | -1.2193438 | PMPCA       | NM_001170902.1  |
| DM14313P4 | 0.04851495 | -1.1132659 | -1.3102986 | 1.2682272  |             |                 |
| DM10292P1 | 0.04851726 | 1.3882606  | 1.6543177  | -1.0010504 |             |                 |
| DM14885P2 | 0.04853413 | 1.1065671  | 1.0981293  | -1.1276765 |             |                 |
| DM05945P2 | 0.04865028 | 1.1321403  | 1.0334187  | -1.0360243 |             |                 |
| DM01636P1 | 0.04868553 | -1.008634  | -1.1057893 | -1.2544423 | CNVAS1      | XM_002161837.1  |
| DM13149P1 | 0.04874433 | 1.0970917  | 1.1010154  | 1.367328   |             |                 |
| DM13355P1 | 0.04880835 | 1.4304537  | 1.637654   | 1.573563   |             |                 |
| DM11822P3 | 0.04882523 | -1.0226996 | 1.0563124  | -1.1803868 |             |                 |
| DM07061P3 | 0.04882631 | -1.0502163 | 1.1017045  | 1.5753123  | AAEL_AAEL0C | XM_001653354.1  |
| DM15458P3 | 0.04885681 | -1.1362123 | -1.250815  | -1.400631  |             |                 |
| DM09430P3 | 0.04887728 | -1.1075418 | -1.4433967 | -1.0172871 |             |                 |
| DM03631P4 | 0.04889392 | -1.095905  | -1.0102531 | -1.3084877 |             |                 |
| DM03386P1 | 0.04892168 | -1.1043417 | 1.1135906  | -1.1795561 |             |                 |
| DM01874P1 | 0.04894193 | 1.0305347  | 1.0081636  | 1.2105322  | CG1140      | NM_167928.1     |
| DM11260P2 | 0.04898013 | 1.0423582  | -1.1793038 | 1.4062667  |             |                 |
| DM06223P1 | 0.04899548 | -1.3794509 | -1.0813603 | -1.2070669 | TUBB3       | XM_001023006.2  |
| DM06015P1 | 0.04905247 | -1.2443666 | -1.3315543 | -1.0698029 |             |                 |
| DM08107P2 | 0.04906008 | 1.2518208  | 1.4736383  | 1.4968634  |             |                 |
| DM11242P3 | 0.0490888  | -1.3194127 | -1.4285531 | -1.5782576 |             |                 |
| DM01769P2 | 0.04913266 | -1.2968339 | 1.2047541  | -1.3788166 | LOC726733   | XM_001122454.1  |
| DM04853P4 | 0.04913572 | 1.0981188  | 1.1855185  | -1.1922387 |             |                 |
| DM09018P3 | 0.04914017 | 1.1405134  | 1.2182357  | 1.4668043  |             |                 |
| DM08153P3 | 0.04915145 | 1.2244784  | 1.3056976  | 1.1348888  |             |                 |
| DM04426P4 | 0.04916026 | -1.1505307 | -1.1662786 | -1.3144814 |             |                 |
| DM12768P1 | 0.04920212 | 1.219306   | 1.711013   | 1.1357677  |             |                 |
| DM09541P2 | 0.04924771 | -1.0081719 | -1.007845  | -1.1689838 |             |                 |
| DM05597P3 | 0.04926333 | 1.0323954  | -1.085267  | -1.1498914 |             |                 |
| DM02969P3 | 0.04926678 | 1.0971391  | -1.2077014 | -1.159364  | DWIL\GK126  | XM_002067749.1  |
| DM04075P2 | 0.04930122 | -1.2228824 | -1.0096204 | -1.1231649 |             |                 |
| DM07779P1 | 0.04931727 | -1.2103157 | 1.0077564  | -1.1695162 |             |                 |
| DM04798P2 | 0.04934276 | -1.1473017 | -1.1858258 | -1.2338883 |             |                 |
| DM12697P4 | 0.04944461 | 1.1382436  | 1.030797   | -1.0228524 |             |                 |
| DM01531P4 | 0.04945028 | -1.1043942 | -1.1710807 | -1.3335438 |             |                 |
| DM01268P2 | 0.04945923 | -1.5754498 | -1.3517976 | -2.1153076 |             |                 |
| DM10552P2 | 0.04949521 | 1.0758746  | 1.2115096  | -1.1110926 |             |                 |
| DM01257P2 | 0.04951517 | 1.0747602  | -1.4399672 | 1.4726924  | CELF4       | NM_001146294.1  |
| DM05320P2 | 0.04959589 | -1.2391567 | -1.9268264 | 2.3200016  |             |                 |
| DM13358P2 | 0.0496043  | -1.0015323 | -1.0368866 | -1.3053766 |             |                 |
| DM10562P1 | 0.04967594 | -1.1847905 | 1.0203651  | -1.4228381 |             |                 |

|           |            |            |            |            |             |                |
|-----------|------------|------------|------------|------------|-------------|----------------|
| DM13143P3 | 0.04969291 | -1.4642276 | -1.0350885 | -1.015011  |             |                |
| DM06232P1 | 0.04969603 | -1.0732712 | -1.0164009 | -1.2875417 | REFBP2      | NM_019484.4    |
| DM04357P3 | 0.04969934 | -1.1151456 | 1.0064319  | -1.2784437 | EBP2        | XM_001274516.1 |
| DM10961P3 | 0.04980722 | 1.2881528  | 1.0128222  | -1.1863052 |             |                |
| DM08112P1 | 0.04986966 | -1.2316332 | -1.1159716 | 1.5200546  |             |                |
| DM14714P1 | 0.04988615 | -1.0506814 | 1.2897677  | 1.0723711  |             |                |
| DM05180P2 | 0.04989725 | -1.0480465 | -1.0762784 | -1.37172   |             |                |
| DM02626P2 | 0.04991266 | 1.131372   | 1.0070974  | -1.0541506 | ZGC:123301  | NM_001037417.1 |
| DM05213P1 | 0.0499165  | -1.4515711 | -1.3762747 | -1.0547575 |             |                |
| DM04498P3 | 0.04994387 | 1.7413361  | 1.6185323  | 1.459969   | ADH5        | NM_001031152.1 |
| DM07021P3 | 0.04995132 | -1.2400141 | 1.2111641  | -1.0905186 |             |                |
| DM11175P1 | 0.04995566 | -1.1381402 | -1.0143617 | -1.3308015 |             |                |
| DM10181P1 | 0.05000493 | -1.0070153 | 1.0106717  | -1.1976942 |             |                |
| DM05185P2 | 0.05007055 | 1.3327415  | 1.897178   | 1.735343   |             |                |
| DM09350P3 | 0.05007175 | 1.0684525  | 1.0568397  | -1.2545482 |             |                |
| DM02124P2 | 0.05009951 | 1.3147714  | 1.1601543  | 1.3079712  | DDC         | XM_002057601.1 |
| DM06385P3 | 0.05011458 | -1.2192885 | -1.1464667 | 1.1549935  |             |                |
| DM06739P2 | 0.05011713 | -1.2601337 | 1.060828   | 1.1272725  |             |                |
| DM00211P2 | 0.05012587 | 1.0405284  | 1.0143793  | -1.3078547 | DMOJ\GI1952 | XM_002004557.1 |
| DM05948P3 | 0.05014204 | -1.3348285 | -1.234966  | -1.4508332 | DMOJ\GI2147 | XM_002010832.1 |
| DM11738P3 | 0.05016852 | -1.0228419 | 1.0819784  | -1.2073578 |             |                |
| DM09088P2 | 0.05030125 | -1.1142356 | -1.2042607 | 1.1893383  |             |                |
| DM07213P2 | 0.05034726 | -1.0903171 | -1.3705556 | -1.5327615 |             |                |
| DM07478P1 | 0.05042783 | -1.0073768 | 1.0773573  | 1.2542374  |             |                |
| DM14519P2 | 0.05042854 | -1.1598642 | -1.1092931 | 1.2795103  |             |                |
| DM05773P2 | 0.0504374  | 1.9495991  | 1.2994797  | 1.1741971  |             |                |
| DM06800P1 | 0.05047614 | -1.0781366 | -1.031468  | -1.2758514 | LOC1001655  | XM_001943159.1 |
| DM13718P3 | 0.05050616 | -1.112245  | 1.0732467  | 1.5059527  |             |                |
| DM05561P2 | 0.05051199 | 1.4572281  | -1.0851305 | -1.6846603 |             |                |
| DM11214P3 | 0.05054908 | 1.0701865  | 1.1786928  | -1.0310504 |             |                |
| DM09868P2 | 0.05055104 | -1.0259444 | 1.070931   | -1.166701  |             |                |
| DM14062P2 | 0.05060595 | 1.0106831  | 1.6308814  | 1.5090406  |             |                |
| DM03887P2 | 0.05066644 | -1.0397228 | 1.038672   | -1.1744303 |             |                |
| DM05660P3 | 0.05069297 | 1.2171144  | 1.0075723  | -1.0138754 | GHITM       | NM_001017195.2 |
| DM11702P1 | 0.05072624 | 1.0522827  | 1.0793266  | -1.1275098 |             |                |
| DM07854P1 | 0.05080667 | -1.184884  | 1.0016001  | 1.1476632  |             |                |
| DM09935P1 | 0.05082567 | 1.0400437  | -1.0741262 | -1.3871421 |             |                |
| DM00315P2 | 0.05084709 | 1.0536596  | -1.1280202 | -1.4151139 | LOC409755   | XM_393249.3    |
| DM08724P1 | 0.05086224 | 1.2611885  | 2.6225507  | -1.095596  |             |                |
| DM12852P2 | 0.05087359 | 1.2991568  | -1.4085894 | 1.518209   |             |                |
| DM01451P3 | 0.0509071  | 1.331384   | -1.5469264 | 1.2997812  |             |                |
| DM05407P3 | 0.05092488 | -1.0368685 | -1.048521  | -1.2999237 |             |                |
| DM11457P3 | 0.05097633 | 1.3685935  | 1.7421223  | 1.2075652  |             |                |
| DM11465P3 | 0.05098203 | -1.3426018 | -1.2327771 | -1.132445  |             |                |
| DM03170P2 | 0.05102781 | -1.0006509 | -1.0820454 | 1.1884606  | DYAK\GE114  | XM_002092735.1 |
| DM08780P3 | 0.05104509 | -1.1030675 | -1.1862259 | -1.1022676 | TVAG_17459  | XM_001319178.1 |
| DM02844P1 | 0.05108793 | 1.0969347  | 1.1502914  | -1.1319075 |             |                |
| DM06078P3 | 0.05112501 | 1.0271286  | -1.38486   | -1.0674175 |             |                |
| DM04415P1 | 0.05114307 | 1.2431172  | -1.0327603 | 1.1568856  |             |                |
| DM03622P3 | 0.05127071 | -1.1942807 | 1.0761122  | -1.0110614 |             |                |

|           |            |            |            |            |                            |
|-----------|------------|------------|------------|------------|----------------------------|
| DM07570P2 | 0.05128967 | 1.0253595  | 1.0383308  | 1.2389671  |                            |
| DM01403P4 | 0.05132507 | 1.0645396  | 1.112686   | -1.1227065 | NEMVEDRAFT XM_001631301.1  |
| DM11557P1 | 0.05133724 | -1.140535  | -1.3064098 | -1.4154958 |                            |
| DM09954P2 | 0.05135305 | -1.0314711 | -1.0442826 | -1.3872399 |                            |
| DM03003P1 | 0.05135403 | -1.0940495 | 1.03691    | 1.0391294  |                            |
| DM14740P1 | 0.05136883 | 1.1271667  | 1.1138306  | 1.2009546  |                            |
| DM05095P1 | 0.05138997 | -1.4468609 | -1.0018107 | -1.2016206 | DPSE\GA185\ XM_001353045.2 |
| DM00033P4 | 0.05140829 | -1.2134182 | -1.2952046 | -1.2843804 | LOC1000579\ XM_001493599.1 |
| DM02843P3 | 0.0514345  | 1.0090624  | 1.1502333  | -1.1601923 | LOC579654 XM_001176359.1   |
| DM10267P1 | 0.05148702 | -1.2975222 | -1.1709583 | 1.0506024  |                            |
| DM02607P2 | 0.05149524 | -1.0574629 | -1.194183  | 1.0123447  | GNPNAT1 NM_001086365.1     |
| DM01616P1 | 0.05150204 | -1.0130204 | 1.0718938  | 1.3497568  | CK XM_001653673.1          |
| DM09338P4 | 0.05152782 | 1.0654465  | 1.05809    | -1.2677728 |                            |
| DM00737P3 | 0.05155774 | 1.0207646  | -1.0606815 | -1.155691  | LOC1001750\ XM_002119273.1 |
| DM01898P1 | 0.05157575 | -1.20076   | 1.0805706  | 1.1612275  | LOC1001657\ NM_001134286.1 |
| DM04048P1 | 0.05158307 | -1.0046475 | 1.0708749  | -1.3817185 |                            |
| DM01950P1 | 0.05163053 | 1.3374816  | 1.4984359  | 1.3088102  | DANA\GF166 XM_001954656.1  |
| DM10337P2 | 0.05164918 | -1.285301  | -1.0784063 | 1.3634436  |                            |
| DM01881P1 | 0.05166304 | -1.113123  | -1.2767375 | -1.1593035 | LOC1001152\ XM_001599996.1 |
| DM00497P2 | 0.05166384 | -1.2627345 | -1.2584106 | -1.4211118 | PSMD2 NM_001101197.1       |
| DM09447P1 | 0.05172768 | -1.3282492 | -1.4819667 | -1.594544  |                            |
| DM02335P2 | 0.05173741 | -1.1462759 | 1.0159736  | 1.1465122  | EEF1G XM_001865765.1       |
| DM13432P3 | 0.05175256 | -1.1225613 | 1.0641891  | 1.4693929  |                            |
| DM05967P4 | 0.05180289 | -1.0365793 | -1.0602871 | 1.0497706  | DWIL\GK197\ XM_002064361.1 |
| DM13717P2 | 0.05180678 | 1.448258   | 1.3438202  | 1.2388046  |                            |
| DM13083P2 | 0.05182333 | -1.4484661 | -1.0380359 | -1.0134846 |                            |
| DM04850P2 | 0.05188489 | -1.0524592 | -1.0579948 | -1.1944261 | DPSE\GA183\ XM_001360213.2 |
| DM05536P3 | 0.05193809 | -1.111508  | 1.044414   | 1.0562824  | GLO1 XM_419481.2           |
| DM14796P2 | 0.05193908 | 1.2368137  | -1.2726424 | 1.6458483  |                            |
| DM11097P1 | 0.05195775 | 1.0724773  | 1.1450744  | -1.1716578 |                            |
| DM12184P3 | 0.05196424 | -1.0711964 | 1.0338582  | -1.1899512 |                            |
| DM09514P4 | 0.05197667 | 1.1451457  | -1.1341205 | -1.3035145 |                            |
| DM07080P1 | 0.05205069 | 1.0116086  | 1.4095381  | -1.0628396 |                            |
| DM09239P1 | 0.05206216 | -1.0722779 | -1.2280505 | 1.002408   |                            |
| DM13148P1 | 0.05208752 | 1.1374893  | 1.6940321  | 1.2120452  |                            |
| DM03849P2 | 0.05209833 | -1.1231992 | -1.1981584 | -1.1907706 |                            |
| DM10663P4 | 0.05210206 | 1.0590209  | 1.0435047  | -1.23653   |                            |
| DM00039P4 | 0.05212377 | 1.0218267  | -1.0037587 | 1.2096814  | AGAP_AGAP0 XM_001688604.1  |
| DM02132P3 | 0.05213405 | -1.0493338 | -1.0321301 | 1.3663726  |                            |
| DM12539P4 | 0.05213668 | 1.0869209  | 1.0026501  | -1.0725771 |                            |
| DM04047P1 | 0.05215863 | 1.0293522  | 1.0319232  | 1.316788   |                            |
| DM07006P2 | 0.05216789 | -1.2520565 | -1.3907244 | -1.7082579 |                            |
| DM11231P1 | 0.05222745 | 1.0251988  | -1.0909606 | -1.1971594 |                            |
| DM04329P3 | 0.05225129 | -1.1171257 | -1.0609586 | -2.1012383 |                            |
| DM06929P1 | 0.05225858 | -1.2711579 | -1.8338997 | 1.1969203  |                            |
| DM06859P1 | 0.05230074 | -1.4024746 | -1.2391244 | -1.2291744 |                            |
| DM00749P3 | 0.05232021 | -1.2546203 | -1.2175183 | -1.024676  | CALR XM_001657698.1        |
| DM12975P3 | 0.05234512 | -1.2196915 | 1.0033886  | 1.1656362  |                            |
| DM02461P2 | 0.05241116 | -1.3954172 | -1.1660933 | 1.2545651  |                            |
| DM07157P3 | 0.05242123 | 1.2472599  | 1.0652294  | 1.3178799  |                            |



|           |            |            |            |            |                             |
|-----------|------------|------------|------------|------------|-----------------------------|
| DM05242P3 | 0.05242439 | 1.074305   | -1.0699509 | 1.2874129  | DYAK\GE199\XM_002094902.1   |
| DM02230P3 | 0.05243126 | -1.9574852 | -2.5225935 | -1.5777801 | POPTRDRAFT_XM_002335211.1   |
| DM11605P1 | 0.05247698 | -1.0775607 | -1.263283  | -1.0218949 |                             |
| DM15043P2 | 0.05249262 | -1.3082321 | 1.0537897  | -1.0057492 |                             |
| DM11156P1 | 0.05250773 | -1.0459313 | -1.2598917 | -1.1675502 |                             |
| DM03564P1 | 0.05255292 | -1.1969182 | 1.0480697  | -1.1643132 | CHRO.10107 XM_662244.1      |
| DM11626P4 | 0.05255672 | 1.0460943  | -1.0371258 | -1.2794799 |                             |
| DM09632P1 | 0.05259284 | 1.026381   | -1.0092405 | -1.2131797 |                             |
| DM14040P4 | 0.05270327 | -1.1622224 | 1.0690026  | 1.043059   |                             |
| DM06961P2 | 0.05270847 | -1.2919291 | 1.0755067  | 1.3215241  |                             |
| DM11550P1 | 0.05272409 | 1.110051   | 1.5581356  | 1.6801034  |                             |
| DM01087P3 | 0.05274786 | 1.160343   | 1.2290055  | 1.0767155  |                             |
| DM12646P3 | 0.05275588 | 1.2858702  | 1.8094593  | 1.4279426  |                             |
| DM11685P3 | 0.05277332 | 1.1946081  | -1.0899086 | -1.0682355 |                             |
| DM03960P1 | 0.05289394 | 1.1774868  | 1.0371323  | -1.0942309 |                             |
| DM15032P2 | 0.05291001 | -1.1034275 | -1.0111457 | 1.2378664  |                             |
| DM12054P3 | 0.05291201 | 1.1422259  | 1.2011654  | -1.0301033 |                             |
| DM06495P2 | 0.05293237 | 1.1403575  | -1.0407032 | 1.408268   | DSEC\GM235 XM_002032306.1   |
| DM11073P4 | 0.05293967 | -1.1972203 | -2.6653411 | -8.003905  |                             |
| DM08421P2 | 0.05297183 | -1.1638422 | -1.0576396 | 1.8443305  |                             |
| DM10222P1 | 0.05301695 | -1.2824335 | -1.2182949 | -1.2128166 |                             |
| DM00065P4 | 0.05310409 | -1.1825798 | -1.0667919 | 1.0449171  | RHOGAPP190 XM_624119.2      |
| DM07702P2 | 0.05314484 | 1.0937562  | 1.3066506  | 1.3261197  |                             |
| DM05603P1 | 0.05316922 | -1.8674568 | -1.3255839 | -1.9984083 | LOC743240 XM_001146981.1    |
| DM10956P2 | 0.05318398 | -1.0058012 | -1.0427545 | -1.4613444 |                             |
| DM08093P1 | 0.05320444 | -1.1401963 | -1.1733932 | -1.1816237 |                             |
| DM01128P1 | 0.05325825 | 1.113669   | 1.110253   | -1.1642425 | LOC1001852\XM_002126040.1   |
| DM12819P2 | 0.05325858 | 1.2275747  | 1.3419303  | 1.4048852  |                             |
| DM00512P1 | 0.05328666 | 1.0070533  | 1.0243767  | 1.152376   | CPIPJ_CPIJ01 XM_001863291.1 |
| DM01133P2 | 0.05328823 | -1.19687   | 1.0078378  | -1.2682115 | NEMVEDRAFT XM_001624696.1   |
| DM08353P2 | 0.05329489 | -1.1453747 | -1.1998304 | 1.0555321  |                             |
| DM02764P3 | 0.05329672 | -1.1514258 | 1.1857044  | 1.4721766  |                             |
| DM00525P2 | 0.0533089  | 1.0167505  | -1.0869505 | 1.2355654  | DMOJ\GI121\XM_002007829.1   |
| DM12474P2 | 0.05334788 | 1.2300967  | -1.0831544 | -1.2846794 |                             |
| DM06574P3 | 0.05334811 | 1.1495656  | -1.0217454 | -1.2473284 | RABG3B NM_102121.2          |
| DM12533P2 | 0.05341047 | -1.0363607 | -1.0250466 | 1.6939193  |                             |
| DM01611P2 | 0.05341547 | 1.1713725  | -1.5450906 | 1.7856629  | LOC448984 NR_002170.3       |
| DM02878P1 | 0.05343678 | -1.0808617 | 1.0988957  | 1.242346   | DMOJ\GI155\XM_002009803.1   |
| DM07940P1 | 0.0534686  | 2.940387   | 5.635345   | 3.0184088  |                             |
| DM03405P2 | 0.05351078 | -1.0432919 | -1.0833968 | -1.2738798 | HCAG_06727 XM_001539072.1   |
| DM06615P1 | 0.05356238 | -1.2596194 | -1.0563042 | 1.2195827  |                             |
| DM01776P3 | 0.05357682 | -1.2831672 | -1.1098934 | -1.5197284 | NOL1 XM_416502.2            |
| DM10955P2 | 0.05359561 | -1.1346028 | 1.1060601  | -1.2173212 |                             |
| DM00282P1 | 0.05359594 | -1.1477427 | -1.062979  | -1.2326818 | LOC732922 NM_001046922.1    |
| DM11585P1 | 0.05360343 | -1.0263808 | -1.2072225 | 1.23164    |                             |
| DM14357P1 | 0.05363679 | -1.1006483 | 1.032971   | 1.406022   |                             |
| DM08669P1 | 0.05366049 | -1.0946505 | 1.0879853  | 1.0905923  |                             |
| DM08748P3 | 0.05366125 | 1.2633531  | 1.4191884  | 1.2659518  |                             |
| DM12246P1 | 0.05367758 | 1.1983359  | 1.1950301  | -1.1297761 | SLC25A36 NM_001132543.1     |
| DM07801P4 | 0.05368204 | -1.1591188 | -1.223063  | 1.0040816  |                             |

|           |            |            |            |            |              |                |
|-----------|------------|------------|------------|------------|--------------|----------------|
| DM04336P2 | 0.05368249 | -1.2238593 | -1.2109815 | -1.0463234 |              |                |
| DM00707P2 | 0.05370798 | -1.2196724 | -1.0304776 | -1.073669  | LOC748687    | XM_001161340.1 |
| DM00064P1 | 0.05371259 | -1.0971388 | -1.2413851 | 1.055249   | ATP1A        | XM_001662168.1 |
| DM01815P1 | 0.05375013 | -1.1084416 | -1.1760077 | -1.1922355 | TER94        | XM_392892.3    |
| DM00474P1 | 0.05376379 | 1.2251726  | -1.0610007 | 1.4375473  | DSEC\GM155   | XM_002040104.1 |
| DM10200P1 | 0.05380985 | 1.1493644  | 1.0000244  | -1.1916761 |              |                |
| DM11741P3 | 0.05384019 | -1.1885394 | 1.1103703  | 1.1965835  |              |                |
| DM08048P3 | 0.05392726 | -1.2241694 | -1.1002964 | 1.1686187  |              |                |
| DM03315P1 | 0.05405989 | 1.1701945  | -1.2064233 | 1.9770216  | LOC592480    | XM_792000.2    |
| DM05315P3 | 0.05412189 | -1.0853187 | -1.458055  | 1.6005706  |              |                |
| DM02194P1 | 0.05412491 | -1.126767  | -1.3165265 | -1.344746  | EIF3-S7      | NM_001044191.1 |
| DM00244P2 | 0.05416654 | -1.319178  | -1.042808  | -1.1557192 | DSIM\GD196   | XM_002102205.1 |
| DM04622P3 | 0.0541713  | 1.3085517  | 1.2454141  | -1.0310037 |              |                |
| DM05504P4 | 0.05421859 | 1.5932493  | 1.5894874  | 1.2813576  |              |                |
| DM05635P4 | 0.05426335 | 1.085762   | -1.0536315 | -1.158698  |              |                |
| DM02183P2 | 0.05426838 | -1.0123036 | -1.0621082 | -1.217088  | DMOJ\GI133   | XM_002008142.1 |
| DM04954P3 | 0.05432763 | 1.0358882  | -1.2907804 | -1.3214242 |              |                |
| DM10231P2 | 0.05436235 | 1.2747632  | 1.1332164  | -1.1229163 |              |                |
| DM00780P3 | 0.05441824 | 1.0350004  | 1.202808   | -1.1776398 | CG40005      | NM_001042956.1 |
| DM03399P1 | 0.05442737 | 1.067047   | -1.0525752 | -1.1442797 | NEMVEDRAFT   | XM_001632475.1 |
| DM00964P3 | 0.05445335 | 1.2550321  | 1.2745982  | 1.0763217  | LOC411935    | XM_395404.3    |
| DM14122P1 | 0.05448331 | 1.051278   | -1.201523  | 1.5638695  |              |                |
| DM13339P1 | 0.05450438 | -1.3586379 | -1.097549  | 1.1442827  |              |                |
| DM06115P1 | 0.05455195 | -1.2140191 | -1.1795049 | -1.2632911 |              |                |
| DM12473P1 | 0.05457186 | 1.0532097  | 1.0474726  | -1.0627872 |              |                |
| DM02909P3 | 0.05457744 | -1.1517819 | -1.1034238 | -1.2655288 | LOC1001190   | XM_001602867.1 |
| DM06963P2 | 0.05462279 | 1.0734171  | -1.4477369 | 1.5519136  |              |                |
| DM11294P3 | 0.05462446 | -1.0242144 | 1.1045439  | -1.2067646 | DWIL\GK120   | XM_002070410.1 |
| DM06076P1 | 0.05466063 | 1.438367   | -2.350451  | -1.4473292 |              |                |
| DM11136P1 | 0.0546727  | -1.0692419 | 1.0941999  | 1.1599772  |              |                |
| DM00250P2 | 0.05468822 | -1.0445805 | -1.0206754 | -1.1628652 | LOC1000280   | XM_001378172.1 |
| DM00912P1 | 0.05476988 | 1.1572685  | -1.0819132 | -1.0882349 | DMOJ\GI138   | XM_002009120.1 |
| DM05485P2 | 0.05480572 | 1.0030215  | -1.0174912 | -1.254433  |              |                |
| DM10015P3 | 0.05482223 | -1.0792334 | 1.3063666  | 1.1257597  |              |                |
| DM08956P3 | 0.05492987 | -1.8959042 | -3.10203   | -2.108684  |              |                |
| DM05379P3 | 0.05494722 | 1.1483473  | 1.4642351  | 1.1405646  |              |                |
| DM03042P4 | 0.0549481  | -1.2816314 | -1.0647047 | -1.1490579 | LOC409978    | XM_393468.3    |
| DM01420P2 | 0.05496346 | -1.1974534 | -1.3164986 | -1.3357911 |              |                |
| DM00153P3 | 0.05498368 | -1.1252761 | -1.4380955 | -1.3155929 | CPIPJ_CPIJ01 | XM_001857663.1 |
| DM04487P4 | 0.05502036 | -1.0571109 | 1.0391923  | 1.1508602  |              |                |
| DM08673P3 | 0.05507275 | 1.2110916  | -1.0483559 | -1.0121822 |              |                |
| DM06514P3 | 0.05507444 | 1.3733113  | -1.2363856 | -1.0695078 |              |                |
| DM08917P2 | 0.05509228 | -1.1505954 | -1.1864038 | -1.3036335 |              |                |
| DM09382P1 | 0.05509416 | -1.3854954 | -1.0196575 | 1.1522533  |              |                |
| DM10615P3 | 0.05514059 | -1.0090684 | 1.1454588  | -1.137956  |              |                |
| DM08082P3 | 0.0551432  | -1.0460619 | 1.4126139  | 1.0969484  |              |                |
| DM10991P2 | 0.05515588 | 1.3390248  | 1.2202824  | -1.1922939 |              |                |
| DM04630P2 | 0.0551619  | 1.1678153  | 1.1678264  | 1.2137023  |              |                |
| DM08372P3 | 0.05516807 | -1.0220317 | -1.0357655 | 1.2418615  |              |                |
| DM01058P3 | 0.05519553 | -1.0578076 | -1.0010939 | -1.1604244 | INTS2        | XM_001503757.2 |

|           |            |            |            |            |            |                |
|-----------|------------|------------|------------|------------|------------|----------------|
| DM02431P1 | 0.0552612  | 1.1332594  | 1.2017899  | 1.2080034  | LOC660580  | XM_966799.1    |
| DM00326P3 | 0.05529065 | 1.1651171  | 1.1157928  | -1.2871779 | LOC1000727 | XM_001502740.2 |
| DM15350P1 | 0.05532431 | -1.0142158 | 1.064492   | 1.1744009  |            |                |
| DM14680P3 | 0.05535279 | -1.113678  | -1.1456422 | 1.3766743  |            |                |
| DM00015P2 | 0.0553706  | 1.1360766  | 1.0687982  | -1.1331476 | TRIADDRAFT | XM_002108214.1 |
| DM03012P1 | 0.05544948 | -1.1376932 | 1.0031666  | -1.3425082 | LOC660418  | XM_966649.2    |
| DM00004P3 | 0.05548006 | 1.0534893  | 1.0053586  | 1.2706673  | AGAP_AGAP0 | XM_001688804.1 |
| DM09015P2 | 0.05550226 | -1.0920484 | 1.0489529  | -1.281466  |            |                |
| DM03888P1 | 0.05557119 | 1.1300017  | 1.2565773  | 1.2328817  |            |                |
| DM10861P2 | 0.05558203 | 1.1924858  | -1.3564291 | 1.7458754  |            |                |
| DM05353P3 | 0.05558331 | -1.0419841 | -1.099911  | 1.187894   |            |                |
| DM04246P2 | 0.05565387 | -1.1219109 | 1.0019137  | -1.2738221 |            |                |
| DM13554P1 | 0.05567458 | -1.2191875 | -1.1987348 | -1.1995542 |            |                |
| DM07048P2 | 0.05567693 | -1.3033973 | -1.1532078 | 1.6361154  |            |                |
| DM04569P3 | 0.0556927  | 1.0127171  | -1.12792   | -1.294187  |            |                |
| DM07077P1 | 0.05571933 | 1.2113439  | 1.249551   | 1.5047493  |            |                |
| DM09411P2 | 0.05575158 | 1.1692003  | 1.2861468  | -1.0914335 |            |                |
| DM12851P2 | 0.05580243 | -1.1946135 | 1.0546787  | -1.2290174 | RBM8A      | XM_001162472.1 |
| DM05473P2 | 0.05580835 | 1.1572748  | -1.1239363 | -1.0450646 |            |                |
| DM04185P1 | 0.05581439 | -1.1247672 | -1.0991862 | -1.2011876 |            |                |
| DM01511P2 | 0.0558188  | -1.1085621 | 1.0359942  | -1.3694483 | NOP58      | XM_001950918.1 |
| DM11181P3 | 0.05583491 | 1.0626261  | -1.1043861 | -1.1577986 | DERE\GG188 | XM_001977086.1 |
| DM01032P1 | 0.0558437  | 1.0080912  | -1.0367739 | -1.3019992 | DPSE\GA140 | XM_001361358.2 |
| DM08237P3 | 0.05586153 | 1.0808438  | 1.3339224  | 1.2615685  |            |                |
| DM08245P3 | 0.05591304 | -1.5506209 | -1.5827255 | -1.2410941 |            |                |
| DM08497P1 | 0.05600973 | 1.1765692  | 1.0185118  | -1.1063371 |            |                |
| DM06750P2 | 0.0560234  | 1.2012111  | 1.3344684  | 1.1596369  |            |                |
| DM04216P2 | 0.05603144 | -1.2215554 | -1.4555097 | -1.154043  |            |                |
| DM09212P3 | 0.05609322 | 1.1676836  | 1.0419853  | 1.3385315  |            |                |
| DM04187P2 | 0.05610329 | -1.0127794 | -1.0709224 | -1.4154533 |            |                |
| DM05107P1 | 0.05616048 | 1.1826085  | 1.1714016  | 1.2900821  |            |                |
| DM05164P2 | 0.05617936 | -1.1636467 | -1.1027659 | -1.3676076 |            |                |
| DM12658P1 | 0.05623088 | -1.000684  | 1.0769069  | -1.2046404 |            |                |
| DM01759P1 | 0.05623524 | 1.013106   | 1.0335996  | 1.0412824  | RPL35A     | NM_001162305.1 |
| DM02065P1 | 0.05623536 | -1.2833402 | -1.2462642 | -1.052654  | DANA\GF202 | XM_001963477.1 |
| DM09969P1 | 0.0562398  | -1.1598105 | -1.1368053 | -1.1905512 |            |                |
| DM06465P2 | 0.05625383 | 1.2051314  | 1.7302878  | -1.4368815 |            |                |
| DM05402P3 | 0.0563019  | 1.0012391  | -1.0048095 | -1.3009596 | LOC1000102 | (XR_030170.1   |
| DM05961P2 | 0.05630357 | 1.0397378  | 1.2163757  | 1.3305601  |            |                |
| DM12082P3 | 0.05632674 | 1.3071371  | -1.3713447 | 1.5098339  |            |                |
| DM00743P1 | 0.05632932 | 1.3806645  | 1.4729519  | 1.4860288  | LOC1002001 | XM_002160326.1 |
| DM04023P3 | 0.05645232 | -1.2818265 | 1.2498235  | -1.0394678 |            |                |
| DM12327P1 | 0.05645787 | -1.166895  | -1.145421  | -1.3949157 | POPTRDRAFT | XM_002332701.1 |
| DM01372P2 | 0.05647621 | -1.1206262 | -1.0093105 | 2.2395735  | DPSE\GA216 | XM_001358387.2 |
| DM11029P2 | 0.05656741 | 1.6097298  | 1.6471934  | 1.9800022  |            |                |
| DM07557P1 | 0.05665086 | -1.1825145 | -1.222772  | -1.2289151 |            |                |
| DM02167P3 | 0.0566718  | -1.3906091 | -1.013745  | -1.3424855 |            |                |
| DM05585P1 | 0.05667811 | -1.651361  | -2.0295079 | -2.3714466 |            |                |
| DM07359P2 | 0.05667839 | 1.1496931  | 1.3093218  | 1.3756728  |            |                |
| DM01375P1 | 0.05671478 | -1.2738477 | -1.2575256 | -1.2413299 |            |                |

|           |            |            |            |            |                            |
|-----------|------------|------------|------------|------------|----------------------------|
| DM03383P1 | 0.05679881 | 1.0277063  | 1.0996572  | 1.1627839  |                            |
| DM05413P1 | 0.05684942 | 1.5399317  | 1.3314385  | 1.3291564  |                            |
| DM04984P4 | 0.05691897 | -1.0165843 | 1.0505346  | 1.1843743  |                            |
| DM13499P1 | 0.05692999 | -1.1354665 | -1.0208608 | 1.3138111  |                            |
| DM02983P1 | 0.05694975 | -1.0517107 | -1.0627875 | 1.4730201  | DMO\JGI100\XM_002000066.1  |
| DM08874P1 | 0.05700486 | -1.0311831 | 1.2076021  | -1.0430479 |                            |
| DM08676P4 | 0.0571053  | 1.0254529  | -1.0395327 | -1.2156852 |                            |
| DM12719P2 | 0.05711631 | 1.17945    | 1.0900683  | -1.1186002 |                            |
| DM02188P3 | 0.0571691  | -1.1598161 | -1.1909381 | -1.387245  |                            |
| DM00284P2 | 0.05717988 | 1.0189556  | -1.2558515 | -1.2413707 | LOC1001168\XM_001607793.1  |
| DM01114P3 | 0.05718885 | 1.0242951  | 1.04028    | -1.0626254 | DWIL\GK145\XM_002074183.1  |
| DM03833P1 | 0.05722877 | -2.1319013 | -1.5755041 | -1.1738249 |                            |
| DM10730P1 | 0.05723612 | -1.0224228 | -1.0196803 | -1.3229251 |                            |
| DM04877P1 | 0.05733421 | -1.1945058 | -1.0547603 | 1.24357    |                            |
| DM11893P1 | 0.05748055 | 1.8191786  | 1.2129806  | -1.1208323 |                            |
| DM00402P2 | 0.0575424  | -1.0060222 | -1.1776551 | -1.1698122 | LOC1000122\XM_001366425.1  |
| DM05670P3 | 0.05755654 | 1.083173   | -1.1851081 | -1.1680822 |                            |
| DM00043P2 | 0.05760033 | -1.4041148 | -1.42367   | -1.5894066 | DANA\GF157\XM_001962937.1  |
| DM04644P2 | 0.05762538 | 1.1694969  | -1.3070084 | 1.0168494  |                            |
| DM01254P1 | 0.05771761 | 1.5657295  | 1.47549    | 1.264137   |                            |
| DM05501P1 | 0.0577339  | 1.4094411  | 1.828296   | 1.1665188  |                            |
| DM12907P3 | 0.05774553 | -1.1399599 | -1.1623441 | 1.1531477  |                            |
| DM11942P1 | 0.05777102 | -1.0679787 | 1.040994   | -1.2864981 | DANA\GF151\XM_001961669.1  |
| DM00917P3 | 0.05781411 | -1.1349087 | -1.0061848 | -1.2416661 |                            |
| DM06893P4 | 0.05782281 | -1.1943382 | 1.1701888  | 1.2849294  |                            |
| DM04229P1 | 0.05787    | 1.2588432  | 1.0115489  | -1.5796568 |                            |
| DM09004P2 | 0.05790284 | -1.084476  | 1.0339007  | 1.0325226  |                            |
| DM08786P1 | 0.05794066 | -1.0372779 | -1.1627783 | -1.3898845 |                            |
| DM15224P2 | 0.05798785 | -1.0084014 | 1.175266   | 1.3313922  |                            |
| DM05825P2 | 0.05799105 | 1.0134187  | -1.1811664 | -1.1050727 | DVIR\GJ2088\XM_002049166.1 |
| DM03020P3 | 0.05807557 | -1.0025121 | -1.0799773 | -1.31839   |                            |
| DM08236P3 | 0.05812922 | -1.1549649 | 1.13194    | 1.5031835  | LOC578747 XM_778901.2      |
| DM03990P3 | 0.05819574 | 1.1122748  | 1.1630741  | -1.2653729 |                            |
| DM04743P1 | 0.05830057 | 1.3502998  | 1.0843107  | -1.2656162 |                            |
| DM11974P3 | 0.05837052 | 1.0354608  | 1.0239297  | -1.161313  |                            |
| DM13494P1 | 0.05843063 | -1.1173468 | -1.0049033 | 1.2197506  |                            |
| DM01593P4 | 0.05843087 | 1.2643257  | 1.1502732  | 1.4630873  | DWIL\GK142 XM_002073607.1  |
| DM04436P3 | 0.05849164 | -1.0962304 | -1.1162484 | -1.2424823 |                            |
| DM05328P2 | 0.0585079  | 1.2639232  | 1.2113739  | 1.1286904  |                            |
| DM03781P3 | 0.05851447 | 1.3640655  | 1.1945868  | 1.2315555  |                            |
| DM10104P1 | 0.05853699 | -1.0225972 | -1.0246333 | -1.291166  |                            |
| DM07040P3 | 0.05858563 | 1.9078474  | 2.82917    | 1.4569216  |                            |
| DM12033P3 | 0.05861495 | -1.1725059 | 1.0126395  | -1.5162573 |                            |
| DM04760P2 | 0.05868125 | 1.0203104  | 1.1399534  | -1.1061585 |                            |
| DM05525P2 | 0.0586877  | 1.1960691  | 1.0651836  | -1.0643648 |                            |
| DM12020P1 | 0.05869719 | 1.1827579  | -1.0755943 | -1.1844646 |                            |
| DM06926P4 | 0.05878079 | 1.0839821  | 1.2713324  | 1.1798168  |                            |
| DM01778P1 | 0.05878176 | 1.079312   | -1.05254   | -1.11305   | HADHB NM_000183.2          |
| DM03557P1 | 0.05883838 | 1.1013108  | -1.2429215 | 1.2821721  | PXT NM_142391.4            |
| DM02468P1 | 0.05885542 | -1.0614388 | -1.1203188 | -1.1891848 | LOC659319 XM_965636.1      |

|           |            |            |            |            |             |                |
|-----------|------------|------------|------------|------------|-------------|----------------|
| DM09762P4 | 0.0588882  | -1.6213971 | -1.4119095 | -1.6251764 |             |                |
| DM10580P2 | 0.0589206  | -1.0785351 | 1.0909568  | 1.1988808  |             |                |
| DM06846P2 | 0.05893568 | -1.1642361 | -1.3708929 | -1.4099855 |             |                |
| DM09497P2 | 0.05895249 | 1.1775784  | 1.2432706  | 1.3094265  |             |                |
| DM13011P1 | 0.05896279 | -1.1906017 | 1.1233623  | 1.1102774  |             |                |
| DM05189P2 | 0.05896911 | 1.0484961  | 1.1240643  | 1.1140914  |             |                |
| DM03240P2 | 0.05898468 | -1.0239248 | -1.0671328 | -1.1997745 |             |                |
| DM01414P4 | 0.05904637 | 1.2538129  | 1.2121593  | -1.7562667 | CAH1        | XM_002079344.1 |
| DM07190P1 | 0.05912912 | 1.0045129  | 1.1563777  | 1.9814188  |             |                |
| DM01053P2 | 0.0591416  | -1.1069623 | -1.050303  | -1.1530435 | LOC1002269  | XM_002192079.1 |
| DM05880P2 | 0.05914306 | 1.0200118  | -1.0795201 | -1.2261794 |             |                |
| DM09034P3 | 0.05915094 | 1.0683169  | -2.1022577 | 1.4158431  |             |                |
| DM09456P1 | 0.05919265 | 1.0378642  | -1.0047771 | -1.1924181 |             |                |
| DM05158P2 | 0.05920908 | -1.06725   | -1.1688789 | -1.1652983 |             |                |
| DM03760P2 | 0.05922296 | 1.2679774  | -1.3401767 | -1.2663158 |             |                |
| DM03486P2 | 0.05923947 | 1.5232316  | 1.6986964  | -1.1173826 | SLC26A11    | XM_540473.2    |
| DM02453P3 | 0.05924936 | -1.0298096 | -1.395512  | -1.2162281 | LOC1000374  | NM_001098359.1 |
| DM15050P1 | 0.05925323 | 1.0621953  | -1.2060919 | 1.2753836  |             |                |
| DM02193P2 | 0.05925937 | 1.2887352  | 1.0802888  | 1.3221854  |             |                |
| DM08875P1 | 0.05928657 | 1.067269   | -1.3486711 | -1.1619873 |             |                |
| DM03617P4 | 0.05934983 | -1.0273324 | -1.0868603 | 1.3980403  |             |                |
| DM12435P1 | 0.05942298 | 1.0498309  | 1.0529886  | -1.1672653 | LOC1001186  | XM_001602486.1 |
| DM15330P3 | 0.05942959 | -1.0729414 | -1.474939  | 1.5816872  |             |                |
| DM04730P2 | 0.0594415  | -1.2043332 | -1.0830557 | 1.0791198  | LOC708291   | XM_001100193.1 |
| DM00436P1 | 0.0595172  | -1.0839556 | -1.0267969 | 1.1770521  | LOC659398   | XM_965708.2    |
| DM00812P1 | 0.05955451 | 1.0654905  | -1.0281732 | 1.2536416  | SYT4        | XM_001655897.1 |
| DM00640P4 | 0.05965512 | 1.2264525  | 1.1940173  | 1.2775389  | F32D8.12    | NM_001028701.2 |
| DM01560P1 | 0.05967649 | 1.008136   | -1.0108398 | 1.026589   | ISCW_ISCWC  | XM_002401605.1 |
| DM04830P1 | 0.05973244 | -1.2497699 | -1.1797962 | -1.4211336 | LOC412616   | XM_396071.2    |
| DM04898P1 | 0.05976014 | 1.2379153  | -1.0642722 | 1.2292823  |             |                |
| DM11843P1 | 0.05977949 | -1.1246052 | 1.0995834  | -1.456667  |             |                |
| DM12160P2 | 0.05980529 | -1.0959399 | -1.2297614 | -1.2835991 |             |                |
| DM12610P3 | 0.05980926 | -1.2255055 | -1.6410204 | 1.5386329  |             |                |
| DM04939P4 | 0.05982805 | 1.0320559  | -1.1422248 | -1.3286462 | LOC1001458  | NM_001126202.2 |
| DM02938P2 | 0.05986141 | -1.0035245 | -1.0846181 | -1.1981299 | LOC552328   | XM_624704.2    |
| DM12517P1 | 0.05988937 | 1.1078088  | 1.0252508  | 1.2603414  |             |                |
| DM08612P2 | 0.05993883 | -1.0625076 | 1.150412   | 1.1969489  |             |                |
| DM00594P2 | 0.05994417 | 1.0402439  | -1.0387777 | -1.3803418 | AAEL_AAEL01 | XM_001661936.1 |
| DM02641P2 | 0.06003057 | -1.0270203 | -1.0019586 | 1.2454121  | DANA\GF207  | XM_001964286.1 |
| DM11572P1 | 0.06005348 | -1.3216784 | 1.0180427  | -1.2629879 |             |                |
| DM06624P3 | 0.06011549 | 1.0364718  | 1.130892   | 1.3736144  |             |                |
| DM03534P1 | 0.06012505 | 1.0842184  | 1.2013402  | 1.0967101  |             |                |
| DM02609P3 | 0.06015101 | 1.148219   | 1.2132035  | 1.1085719  | DVIR\GJ2006 | XM_002050656.1 |
| DM11416P1 | 0.0601513  | -1.0504193 | -2.4618347 | -1.0308588 | NEMVEDRAFT  | XM_001636670.1 |
| DM12267P1 | 0.06015748 | -1.0118163 | -1.146406  | 1.1031992  |             |                |
| DM11280P1 | 0.0601743  | -1.1439478 | -1.0036643 | -1.3730614 |             |                |
| DM02517P3 | 0.06020618 | 1.0828929  | 1.1285344  | -1.0413063 |             |                |
| DM08653P1 | 0.06024384 | -1.046032  | -1.2075503 | -1.3206758 |             |                |
| DM09309P2 | 0.06043341 | 1.172709   | -1.0418009 | -1.0576384 |             |                |
| DM11265P2 | 0.06045634 | 1.6111636  | 1.7812974  | 1.9768153  |             |                |

|            |            |            |            |            |             |                |
|------------|------------|------------|------------|------------|-------------|----------------|
| DM04864P3  | 0.06053829 | 1.0563558  | 1.1042446  | -1.2920464 |             |                |
| DM01159P2  | 0.06057712 | 1.0624088  | -1.1175549 | -1.1120999 | NITO        | XM_624841.2    |
| DM11832P1  | 0.06061237 | -1.1086783 | 1.0144686  | 1.1208926  |             |                |
| DM01587P3  | 0.06062336 | -1.0941395 | -1.2295191 | -1.273784  | DGR\IGH139' | XM_001996070.1 |
| DM00442P3  | 0.06065013 | -1.1780792 | -1.0956643 | 1.007183   | LOC581398   | XM_781400.2    |
| DM08795P3  | 0.06066569 | -1.282256  | -1.1554124 | -1.446634  |             |                |
| DM07307P2  | 0.06069226 | -1.7243102 | -1.6527591 | -1.7030833 |             |                |
| DM04940P1  | 0.06071946 | -1.2835994 | -1.1839209 | -1.1442187 |             |                |
| DM111138P4 | 0.0607581  | -1.3025829 | -1.0142012 | 1.0582881  |             |                |
| DM08879P2  | 0.06076035 | -1.2196543 | -1.1280421 | -1.3781041 |             |                |
| DM05841P2  | 0.06077377 | 1.2258089  | -1.4397334 | 1.6873169  |             |                |
| DM06203P3  | 0.06080624 | -1.1205958 | 1.0019691  | 1.0576495  |             |                |
| DM10336P3  | 0.06083153 | -1.2319655 | -1.2094623 | -1.0989524 |             |                |
| DM01793P3  | 0.06088759 | 1.1454709  | 1.0165598  | 1.4703594  |             |                |
| DM15054P3  | 0.06089159 | -1.1754829 | -1.0943916 | 1.0458218  |             |                |
| DM04347P1  | 0.06091753 | -1.3084807 | -1.0681323 | 1.2643476  | LOC656585   | XM_963106.1    |
| DM13368P1  | 0.06094511 | -1.1631328 | 1.093023   | 1.229571   |             |                |
| DM05844P2  | 0.06095548 | 1.3252907  | 1.067465   | 1.0571886  | MAP1LC3A    | XM_417327.2    |
| DM00294P3  | 0.06104184 | -1.0150428 | 1.1301817  | -1.074383  | SIAH1       | NM_001091969.1 |
| DM08297P1  | 0.06111012 | 1.2000152  | 2.1572897  | 4.0914907  |             |                |
| DM04952P4  | 0.06112349 | -1.2044859 | 1.0510534  | -1.334768  |             |                |
| DM15236P1  | 0.06114458 | -1.1136973 | -1.1620605 | -1.3140227 |             |                |
| DM14230P1  | 0.06114885 | 1.0233449  | 1.0834575  | -1.1738572 |             |                |
| DM03256P1  | 0.0612261  | -1.2811983 | -1.2086791 | -1.2315985 |             |                |
| DM13166P2  | 0.06122748 | -1.2571632 | 1.0191077  | -1.0387331 |             |                |
| DM02185P4  | 0.06126727 | 1.0412333  | 1.0831088  | -1.3105229 | PCCB-1      | NM_171648.2    |
| DM07797P1  | 0.06139657 | -1.1339058 | 1.0082407  | 1.2672827  |             |                |
| DM09246P1  | 0.06146653 | 1.0247028  | -1.0291528 | -1.6436884 |             |                |
| DM10842P2  | 0.06148794 | -1.1570657 | 1.0085764  | 1.217955   |             |                |
| DM03190P2  | 0.06158694 | 1.1317307  | 1.2582706  | 1.2329746  |             |                |
| DM11697P4  | 0.06162255 | 1.1149818  | -1.3331239 | -1.0983146 |             |                |
| DM02911P1  | 0.06162752 | -1.1281488 | -1.0842532 | -1.2715925 | FRMD4A      | NM_018027.3    |
| DM05217P3  | 0.06163525 | -1.0037525 | -1.0179511 | 1.5797899  |             |                |
| DM05454P2  | 0.06165481 | 1.1762295  | 1.1857599  | 1.3823737  |             |                |
| DM01430P1  | 0.06169828 | -1.329217  | -1.1132327 | -1.2165452 | LOC408528   | XM_392073.3    |
| DM08689P2  | 0.0617126  | 1.0548452  | 1.1803765  | -1.165424  |             |                |
| DM00526P2  | 0.06181667 | -1.0992576 | -1.2198646 | -1.300517  | LOC655455   | XM_961999.2    |
| DM00380P2  | 0.06191417 | -1.1185759 | -1.0774878 | -1.327031  | CTBP        | XM_001998888.1 |
| DM05535P2  | 0.06194267 | 1.1068461  | 1.4600031  | -1.5523317 |             |                |
| DM06722P2  | 0.06199535 | 1.2048447  | -1.0194104 | 1.3259431  |             |                |
| DM03050P2  | 0.06210849 | -1.6245371 | -1.5537009 | -1.4982303 |             |                |
| DM07163P1  | 0.06211612 | -1.056927  | 1.1725192  | 1.233618   | LOC656410   | XM_962943.2    |
| DM01486P4  | 0.06211904 | 1.0526686  | -1.7546583 | -2.0734396 |             |                |
| DM13874P2  | 0.06214059 | -1.0308636 | 1.0510408  | 1.4279896  |             |                |
| DM01694P1  | 0.06216181 | -1.0364399 | -1.0212036 | 1.2074447  | LOC1000301: | XM_001372533.1 |
| DM10596P1  | 0.06217795 | 1.1067557  | -1.3391602 | -1.2058734 |             |                |
| DM11041P1  | 0.06223156 | 1.0286683  | 1.1462259  | -1.2210201 |             |                |
| DM11724P1  | 0.06226006 | 1.026898   | 1.0628794  | 1.2621884  |             |                |
| DM08846P3  | 0.0622601  | -1.9074908 | -2.136385  | 1.4076046  |             |                |
| DM03119P2  | 0.06228415 | 1.3474203  | 1.3052604  | 1.241638   |             |                |

|           |            |            |            |            |            |                |
|-----------|------------|------------|------------|------------|------------|----------------|
| DM10239P1 | 0.06228428 | 1.3397685  | 1.1579746  | 1.4623824  |            |                |
| DM12868P1 | 0.06230287 | -1.0958308 | 1.2136952  | 1.0149871  |            |                |
| DM14170P2 | 0.06230978 | -1.0216308 | -1.194555  | 1.0393872  |            |                |
| DM09852P2 | 0.06231594 | -1.004946  | 1.1269649  | 1.2843087  |            |                |
| DM01506P1 | 0.06235547 | -1.0388182 | -1.169793  | -1.199175  | LOC490143  | XM_849857.1    |
| DM00797P1 | 0.06236235 | 1.065161   | -1.0221912 | -1.0845402 | LOC1000871 | XM_001517077.1 |
| DM10668P3 | 0.06239344 | -1.0043622 | -1.0900882 | -1.4333569 |            |                |
| DM02392P1 | 0.0625317  | -1.1016378 | -1.0791653 | -1.2136803 | HIST2H2AB  | XM_001862691.1 |
| DM12854P3 | 0.06257284 | 1.0165118  | -1.2520916 | -1.12513   |            |                |
| DM12393P1 | 0.0626472  | 1.0468421  | -1.274774  | 1.5436424  |            |                |
| DM09122P1 | 0.06269087 | -1.279458  | -1.0987995 | -1.2216759 |            |                |
| DM03017P3 | 0.06272551 | -1.0756617 | 1.1328534  | -1.1504972 | LOC1001601 | XM_001944250.1 |
| DM04963P3 | 0.0627399  | 1.4314938  | 1.0213382  | 1.1231526  | CYP4BW4    | XM_001603994.1 |
| DM00611P2 | 0.06288744 | 1.0525048  | -1.0484064 | -1.1314785 | BRAFLDRAFT | XM_002586225.1 |
| DM04755P3 | 0.06295406 | 1.1492314  | 1.2632402  | 1.3281747  |            |                |
| DM08146P1 | 0.06296948 | -1.1119838 | -1.0062078 | 1.1316859  |            |                |
| DM04082P1 | 0.06298039 | -1.1578265 | -1.1115855 | -1.2315497 | DWIL\GK140 | XM_002073219.1 |
| DM00670P2 | 0.06299757 | -1.0057931 | -1.1895821 | -1.0424263 | TXNRD1     | NM_001122673.1 |
| DM05588P1 | 0.06303506 | 1.5899974  | 1.7709668  | 1.6615382  |            |                |
| DM05221P1 | 0.06307136 | -1.109714  | 1.1405374  | 1.3250406  |            |                |
| DM13810P2 | 0.06307874 | -1.1070067 | -1.0623013 | -2.6799054 |            |                |
| DM01484P2 | 0.06307925 | -1.065751  | -1.0784044 | -1.274741  |            |                |
| DM04844P3 | 0.06320228 | 1.1256568  | 1.2361473  | 1.1280664  |            |                |
| DM05293P3 | 0.06325453 | -1.1316361 | -2.3401828 | -2.2211292 | DANA\GF102 | XM_001957049.1 |
| DM14593P1 | 0.06325501 | -1.471514  | -1.7210335 | -1.4330336 |            |                |
| DM02117P4 | 0.06327628 | -1.1352286 | 1.0037932  | -1.2300752 | SFRS7      | XM_001122800.1 |
| DM12360P1 | 0.06334768 | 1.0838987  | 1.501632   | 1.1162256  |            |                |
| DM09736P1 | 0.06338836 | 1.0654806  | 1.0660871  | 1.2276889  |            |                |
| DM05430P2 | 0.06340437 | 1.1251423  | 1.0361471  | -1.1316847 | DSEC\GM175 | XM_002042688.1 |
| DM07800P4 | 0.06343284 | 1.0048304  | 1.1889939  | -1.1324044 |            |                |
| DM13741P3 | 0.0634474  | -1.3105454 | 1.0233411  | 1.2420529  |            |                |
| DM15131P1 | 0.06351413 | 1.0321088  | -1.1907772 | -1.1839373 |            |                |
| DM08083P1 | 0.06355865 | -1.6670367 | -1.623219  | -1.7310193 |            |                |
| DM15063P3 | 0.06360716 | -1.4776622 | 1.2025789  | -1.0376345 |            |                |
| DM06987P1 | 0.06363938 | 3.0878797  | 5.289753   | 2.5944438  |            |                |
| DM12285P1 | 0.06364802 | 1.0822006  | 1.1271541  | 1.0728917  |            |                |
| DM04021P3 | 0.06368281 | -1.1502674 | -1.0498192 | 1.2478353  |            |                |
| DM07751P2 | 0.06369789 | -1.3067214 | -1.0021093 | 1.6188847  |            |                |
| DM04801P3 | 0.0637327  | 1.3752714  | 1.2919191  | 1.3956264  |            |                |
| DM02623P1 | 0.06377272 | 1.0085315  | 1.3715572  | 1.2817943  | ALDH       | XM_001655875.1 |
| DM12647P2 | 0.06378505 | 1.0499276  | 1.0945065  | 1.1975881  |            |                |
| DM06278P3 | 0.06380925 | -1.0802665 | -1.139187  | -1.3988011 |            |                |
| DM13451P3 | 0.06386749 | 1.9478052  | -1.4348251 | 1.4295806  |            |                |
| DM12013P3 | 0.06389484 | 1.1130936  | 1.006679   | 1.365067   |            |                |
| DM08323P2 | 0.06390095 | -1.1364393 | 1.0851141  | 1.1956986  |            |                |
| DM04497P1 | 0.06391729 | -1.2094293 | 1.0578399  | -1.2669189 |            |                |
| DM03983P3 | 0.06395615 | -1.463865  | -1.635955  | -1.0252166 |            |                |
| DM09510P3 | 0.0640287  | 1.117953   | -1.683617  | 1.3627155  |            |                |
| DM12914P1 | 0.0640301  | 1.3433824  | -1.6570586 | -1.5533252 |            |                |
| DM06573P2 | 0.06412888 | 1.0887545  | 1.136759   | -1.1497773 |            |                |

|           |            |            |            |            |              |                |
|-----------|------------|------------|------------|------------|--------------|----------------|
| DM14358P3 | 0.0641719  | -1.1725168 | -1.1111296 | -1.0066143 |              |                |
| DM09610P3 | 0.0641822  | -1.4251105 | -1.2117202 | 1.1973379  |              |                |
| DM13131P4 | 0.06418891 | -1.2762504 | -1.1918347 | -1.0578256 | LOC591069    | XM_001177128.1 |
| DM01098P2 | 0.06418955 | 1.0261273  | 1.0760659  | -1.1079328 | CSNK1B       | NM_001098159.1 |
| DM05897P1 | 0.06422454 | -1.0169868 | 1.1789752  | 1.1908344  |              |                |
| DM13466P1 | 0.06428707 | -1.0793679 | 1.2709147  | 1.2827606  |              |                |
| DM06013P2 | 0.06434063 | -1.145639  | 1.1461896  | -1.0694095 |              |                |
| DM07416P2 | 0.06434599 | -1.0565374 | -1.0220245 | 1.1768397  |              |                |
| DM01419P3 | 0.06435078 | 1.1991967  | 1.0056028  | -1.1633075 | GLCAT-I      | XM_002100089.1 |
| DM03220P4 | 0.0643602  | -1.1416862 | 1.0772651  | -1.2023076 | DWIL\GK130   | XM_002073523.1 |
| DM04802P4 | 0.06440003 | 1.0759567  | -1.08652   | 1.2034068  |              |                |
| DM13418P4 | 0.06443519 | -1.0559359 | 1.0565008  | 1.50486    |              |                |
| DM02670P1 | 0.06444676 | 1.1530517  | 1.2405788  | 1.3546817  |              |                |
| DM08856P2 | 0.06451576 | 1.7648425  | 1.9817445  | 1.3987156  |              |                |
| DM11734P2 | 0.06457459 | -1.2462348 | -1.1257697 | -1.585963  |              |                |
| DM03828P2 | 0.06457538 | -1.1900364 | 1.0155041  | -1.3555143 |              |                |
| DM07896P3 | 0.06461719 | 1.3167142  | -1.6692178 | -3.2795825 |              |                |
| DM11575P3 | 0.0646662  | 1.0657265  | -1.1473637 | -1.1395243 |              |                |
| DM04967P3 | 0.06470263 | 1.0779217  | 1.2457379  | 1.2613645  |              |                |
| DM10312P1 | 0.0647315  | -1.1174978 | 1.357153   | 1.9559683  |              |                |
| DM08603P1 | 0.06474315 | 1.2950385  | -1.0407281 | 1.7140878  |              |                |
| DM12277P1 | 0.06488834 | -1.0089523 | -1.060172  | 1.1801764  |              |                |
| DM04829P3 | 0.0648983  | 2.2614496  | 3.5544477  | 1.497038   |              |                |
| DM03490P1 | 0.06491432 | -1.00457   | -1.0015848 | -1.289826  | BRAFLDRAFT   | XM_002598278.1 |
| DM12222P1 | 0.06492535 | 1.100027   | 1.0893662  | 1.166735   |              |                |
| DM03018P2 | 0.06496102 | 1.0535145  | 1.1613528  | 1.065792   | DVIR\GJ2055  | XM_002049751.1 |
| DM03024P2 | 0.06502428 | -1.1272895 | -1.0773813 | -1.288008  | CCDC124      | NM_001016496.2 |
| DM02448P3 | 0.0650289  | -1.1481661 | -1.0903875 | -1.3941532 | CCT7         | NM_001166285.1 |
| DM12809P1 | 0.06503616 | -1.3390307 | -1.2709242 | -1.5314039 |              |                |
| DM04807P2 | 0.06504865 | -1.7793366 | -1.458093  | 1.0517435  |              |                |
| DM12366P1 | 0.06509767 | 1.0226233  | 1.0656475  | -1.2103547 |              |                |
| DM07920P3 | 0.06518924 | 1.1208441  | 1.3108971  | 1.1176028  |              |                |
| DM02519P2 | 0.06519418 | 1.2751029  | 1.0148549  | 1.1607481  | PRKCA-BINDI  | XM_001847009.1 |
| DM05656P3 | 0.06528259 | -1.2172648 | -1.1083441 | -1.4404228 |              |                |
| DM09154P1 | 0.06528577 | -1.1183887 | -1.0157838 | -1.1583005 |              |                |
| DM01033P1 | 0.06541626 | -1.0009589 | -1.2061833 | -1.5859829 | CPIPJ_CPIJOC | XM_001842324.1 |
| DM14218P1 | 0.06545782 | -1.0870479 | 1.1036079  | 1.1932687  |              |                |
| DM01243P1 | 0.06547131 | 1.0190673  | 1.07506    | -1.1366783 | MITD1        | NM_001004902.1 |
| DM08520P1 | 0.06550334 | 1.0580764  | 1.2451886  | 1.1738263  |              |                |
| DM08938P1 | 0.06577713 | 1.0656588  | -1.8426219 | 2.1667087  |              |                |
| DM07167P1 | 0.06586274 | -1.2776467 | -1.0724311 | 1.430287   |              |                |
| DM04088P3 | 0.0658742  | 1.2981288  | 1.2548741  | 1.132826   | LOC1001367   | NM_001124685.1 |
| DM04439P1 | 0.06592383 | 1.28518    | -1.0389755 | 1.6597846  |              |                |
| DM02242P1 | 0.06598698 | -1.1168604 | -1.1342021 | -1.2083863 | DANA\GF162   | XM_001955362.1 |
| DM07372P3 | 0.0660002  | -1.0629134 | 1.141187   | 1.2426788  |              |                |
| DM02067P4 | 0.06601641 | -1.1981527 | -1.53613   | -1.4973103 | TUSC3        | XM_844352.1    |
| DM09301P1 | 0.06605116 | -1.2646235 | -1.3352988 | -1.0562621 |              |                |
| DM07129P2 | 0.06607486 | 2.583752   | 5.552851   | 1.3980492  |              |                |
| DM07164P3 | 0.06607977 | -1.1668    | -1.4562522 | -1.0603303 |              |                |
| DM08733P4 | 0.0660931  | 1.0455171  | 1.0488669  | -1.3997703 |              |                |



|           |            |            |            |            |                            |
|-----------|------------|------------|------------|------------|----------------------------|
| DM00147P3 | 0.0661611  | 1.1829929  | -1.3482776 | 1.1289784  | DYAK\GE143\XM_002092767.1  |
| DM11080P2 | 0.06618958 | -1.0666893 | -1.163665  | -1.2249303 | METTL6 NM_152396.2         |
| DM11145P1 | 0.06619301 | 1.0639586  | 1.3732442  | 1.0866433  |                            |
| DM08007P1 | 0.0661964  | 1.1114988  | 1.223224   | -1.1113449 |                            |
| DM13783P3 | 0.06620931 | -1.092596  | 1.2379125  | -1.7389749 |                            |
| DM00774P1 | 0.06622172 | 1.1351992  | -1.0110394 | -1.1716768 | POPTRDRAFT.XM_002297631.1  |
| DM12077P3 | 0.06628966 | -1.0346682 | 1.1264886  | -1.2022156 |                            |
| DM10566P3 | 0.06630065 | -1.0370475 | 1.009864   | 1.2228644  |                            |
| DM07869P2 | 0.06637189 | -1.0884223 | -1.2130955 | 1.2880577  |                            |
| DM01948P1 | 0.06639918 | -1.7611226 | -1.40114   | -1.2357378 |                            |
| DM03292P1 | 0.06644283 | -1.0110466 | -1.0475532 | -1.2841016 | LOC1001663:XM_001946703.1  |
| DM02383P3 | 0.06647475 | -1.3695928 | -1.4066113 | -1.5233943 | ALAS XM_002092691.1        |
| DM03447P3 | 0.0665495  | 1.0726719  | -1.0245947 | 1.267286   | LOC776168 XM_416649.2      |
| DM04812P3 | 0.06664299 | -1.0000621 | -1.1348242 | -1.1613642 |                            |
| DM03978P1 | 0.06664632 | -1.2325525 | 1.0697399  | -1.0355452 | LOC475682 XM_532889.2      |
| DM14144P1 | 0.06666665 | -1.1360395 | -1.0932393 | 1.2625817  |                            |
| DM01758P3 | 0.06672262 | 1.0917544  | -1.2974384 | -1.3823533 | DWIL\GK130\XM_002073646.1  |
| DM00126P2 | 0.06672657 | 1.0683104  | -1.0106021 | 1.2838619  | AGAP_AGAP0 XM_001688604.1  |
| DM13602P1 | 0.06672917 | 1.3065093  | 1.2885314  | 1.2798525  |                            |
| DM06684P1 | 0.06681788 | -1.075385  | -1.0386698 | 1.2302141  |                            |
| DM09048P1 | 0.06682675 | -1.3171191 | -1.083115  | 1.4089757  |                            |
| DM13063P1 | 0.06682967 | -1.0884273 | 1.0413585  | -1.2273519 |                            |
| DM10555P3 | 0.06688098 | 1.88909    | 3.1297646  | 1.5888661  |                            |
| DM08802P1 | 0.066912   | -1.0223566 | -1.0017717 | -1.3058251 |                            |
| DM11413P4 | 0.06693966 | -1.0919207 | -1.0229822 | 1.0771979  |                            |
| DM13852P2 | 0.06699    | -1.3143216 | -1.0641111 | 1.0199102  |                            |
| DM14677P3 | 0.06700122 | -1.1425179 | 1.1419965  | 1.2365814  |                            |
| DM12141P2 | 0.06707105 | 1.447864   | -2.2112644 | -1.4245721 |                            |
| DM10041P3 | 0.06711989 | 1.3130369  | 1.2082222  | 1.5770336  |                            |
| DM09539P1 | 0.06717043 | -1.0665153 | 1.0774647  | -1.1306463 |                            |
| DM06776P2 | 0.06718575 | 1.6198831  | 2.1851573  | 2.382979   |                            |
| DM15230P3 | 0.06721716 | 1.076243   | -1.1226763 | 1.0776367  |                            |
| DM02379P4 | 0.06728026 | 1.0092242  | 1.0289412  | -1.2036847 | DRG2 NM_001006839.1        |
| DM01154P3 | 0.06730356 | 1.1037421  | 1.261115   | -1.0505972 |                            |
| DM11973P3 | 0.06731746 | 1.0633459  | 1.4148396  | 1.3696268  |                            |
| DM01921P3 | 0.06735291 | -1.5716208 | -1.0051303 | 1.6826195  |                            |
| DM09484P1 | 0.0674496  | -1.161531  | -1.3057288 | -1.3522712 |                            |
| DM08060P1 | 0.06749976 | -1.2204696 | -1.6631831 | -1.0001676 |                            |
| DM13930P3 | 0.06750888 | -1.2369543 | -1.2601819 | -1.0390214 |                            |
| DM09136P4 | 0.06754995 | 1.6421288  | 1.2057475  | 2.00213    |                            |
| DM00785P3 | 0.06755917 | -1.0724669 | -1.227938  | -1.2061195 | DVIR\GJ2190 XM_002049972.1 |
| DM09586P1 | 0.06766202 | -1.1280055 | 1.0531855  | -1.5512064 |                            |
| DM09919P2 | 0.06767238 | 1.1608773  | -1.3129535 | 1.1166555  |                            |
| DM00603P1 | 0.06770967 | 1.0496125  | -1.229331  | -1.0459199 | LOC1001168\XM_001607793.1  |
| DM07386P2 | 0.06773415 | -1.0198117 | -1.2911822 | -1.2761263 |                            |
| DM06894P3 | 0.0678272  | 1.0990074  | 1.3949943  | -1.1491503 |                            |
| DM08454P2 | 0.06786346 | -1.2396296 | -1.0810467 | 1.1967664  |                            |
| DM11059P2 | 0.06798737 | 1.3031013  | 1.1723553  | 1.0959052  |                            |
| DM10853P1 | 0.06798855 | 1.0533262  | -1.2606833 | 1.3568685  |                            |
| DM12095P4 | 0.06802233 | 1.437888   | 1.5446637  | 1.1702148  |                            |

|           |            |            |            |            |            |                |
|-----------|------------|------------|------------|------------|------------|----------------|
| DM11574P1 | 0.06815819 | 1.1978945  | 1.2117524  | -1.4855527 |            |                |
| DM12092P1 | 0.06819799 | 1.1895463  | -1.0664347 | 1.7323114  |            |                |
| DM06618P4 | 0.0682216  | -2.0929003 | -1.6379349 | -2.1073163 |            |                |
| DM13504P2 | 0.06832845 | 1.1823604  | 1.2707629  | 1.0791675  |            |                |
| DM04584P1 | 0.06835389 | 1.0535859  | -1.0722622 | -1.2547166 |            |                |
| DM03836P1 | 0.06839383 | -1.357042  | -1.0248814 | 1.8014499  |            |                |
| DM11649P2 | 0.06847202 | -1.1434933 | -1.0148584 | 1.1339982  |            |                |
| DM02205P3 | 0.06855033 | 1.1029174  | 1.0324904  | -1.0421698 | DWIL\GK168 | XM_002061982.1 |
| DM14343P2 | 0.06862927 | -1.2258478 | -1.0152116 | -1.3390723 |            |                |
| DM08797P2 | 0.06865149 | 1.1837205  | -1.5315083 | 1.9714121  | LOC1002204 | XM_002191988.1 |
| DM11386P4 | 0.0686629  | 1.1047525  | 1.1725786  | 1.3978261  |            |                |
| DM03816P2 | 0.06869195 | 1.0755683  | -1.1932722 | 1.1041511  |            |                |
| DM02374P3 | 0.06869673 | -1.4762872 | -1.1204052 | -1.7718196 | HPRT1      | NM_012583.2    |
| DM08937P1 | 0.06876627 | -1.2295417 | 1.0048395  | -1.3404438 |            |                |
| DM12856P3 | 0.06884491 | -1.1698141 | 1.0022231  | 1.0091918  |            |                |
| DM02325P2 | 0.06891079 | -1.1521605 | -1.0956025 | -1.3240321 | NCU11213   | XM_953718.1    |
| DM06619P1 | 0.06892856 | 1.2095214  | 1.2168407  | -1.3262942 | LOC410883  | XM_394359.2    |
| DM02495P1 | 0.06893434 | 1.0254632  | 1.6427087  | 1.1163338  |            |                |
| DM10207P2 | 0.06903296 | -1.0828391 | -1.0554482 | -1.3390623 |            |                |
| DM09978P3 | 0.06919128 | 1.129254   | 1.5805845  | 1.7644231  |            |                |
| DM11971P1 | 0.06919485 | 1.1235062  | -1.2003593 | -1.1790601 |            |                |
| DM03556P4 | 0.06927843 | -1.1005323 | -1.2352136 | -1.3145791 | MRPS5      | XM_001865086.1 |
| DM00318P3 | 0.06929202 | -1.1493412 | -1.1574383 | 1.0339798  | LOC664324  | XM_970331.2    |
| DM11509P1 | 0.06933904 | -1.007419  | -1.0815585 | -1.2753563 |            |                |
| DM07156P3 | 0.06940425 | 1.2704155  | 1.2991581  | 1.3472451  |            |                |
| DM12522P1 | 0.06946133 | 1.1612749  | -1.029079  | 1.2109488  |            |                |
| DM10077P2 | 0.069543   | 1.0961329  | 1.1944509  | 1.2790141  |            |                |
| DM14196P3 | 0.06958342 | -1.1159904 | -1.2104186 | 2.0996     |            |                |
| DM10019P1 | 0.06959478 | -1.3888531 | -1.1914616 | -1.0111129 |            |                |
| DM08741P1 | 0.06961889 | 1.2013304  | 1.27896    | 1.2493004  |            |                |
| DM08216P1 | 0.06962276 | -1.1995641 | 1.013992   | -1.1798992 |            |                |
| DM09232P1 | 0.06964729 | -1.1222249 | -1.0682532 | 1.2678069  |            |                |
| DM00676P3 | 0.06972262 | -1.0926193 | -1.0179965 | -1.1899459 | LOC410447  | XM_393927.3    |
| DM14171P1 | 0.06980846 | 1.0529225  | -2.1134906 | -1.0076789 |            |                |
| DM14183P4 | 0.0698247  | -1.045016  | -2.137256  | -1.5658456 |            |                |
| DM04318P3 | 0.06987879 | -1.2382802 | 1.3646345  | -1.0571007 |            |                |
| DM08325P1 | 0.06989846 | 1.1967276  | -1.0000277 | 2.7847116  |            |                |
| DM10275P3 | 0.0699027  | -1.0063066 | 1.2027669  | 1.239879   |            |                |
| DM06918P3 | 0.06992909 | -1.252736  | -1.2613512 | 1.0744629  |            |                |
| DM01880P1 | 0.06997541 | -1.4904895 | -1.6289967 | -1.6458247 |            |                |
| DM03642P4 | 0.07007625 | 1.0530186  | -1.0569805 | -1.0971316 |            |                |
| DM03635P1 | 0.07009165 | 1.1087211  | -1.0556753 | -1.097404  | DYAK\GE210 | XM_002089995.1 |
| DM03061P4 | 0.0702784  | -1.1189867 | -1.099268  | -1.1490672 | LOC1000275 | XM_001377766.1 |
| DM14160P3 | 0.07030205 | -1.6446145 | -1.6518947 | 1.462514   |            |                |
| DM01848P1 | 0.07033762 | -1.1286954 | -1.0904624 | 1.1587123  | LOC1000261 | XM_001376807.1 |
| DM11224P3 | 0.07034903 | 1.0231489  | -1.0793996 | -1.2714713 | LOC414032  | XM_397468.3    |
| DM10423P1 | 0.07035391 | -1.0270293 | -1.1205252 | 1.3704152  |            |                |
| DM02953P4 | 0.07035875 | -1.2137089 | -1.0514146 | 1.0952891  | COPG       | NM_001090106.1 |
| DM04036P4 | 0.07037336 | 3.5355928  | 6.8239384  | -1.0796411 |            |                |
| DM06647P2 | 0.07042847 | -1.0367073 | -1.3327014 | 1.6003584  |            |                |

|           |            |            |            |            |             |                |
|-----------|------------|------------|------------|------------|-------------|----------------|
| DM08902P2 | 0.07045648 | -1.484927  | -1.0574833 | -1.9976164 |             |                |
| DM01884P2 | 0.07047162 | 1.1919762  | 1.2125201  | -1.3922764 | AMY         | XM_001846491.1 |
| DM06419P1 | 0.07047392 | -1.1690148 | -1.0958792 | 1.2580734  |             |                |
| DM09998P4 | 0.07047613 | 1.0994761  | -1.0229892 | -1.3064691 |             |                |
| DM03577P1 | 0.07050426 | 1.0262792  | -1.0260304 | -1.4518577 | AGAP_AGAP0  | XM_307942.4    |
| DM14717P1 | 0.07055545 | 1.0884377  | 1.0999231  | 1.2208409  |             |                |
| DM14487P1 | 0.07062674 | 1.0006677  | -1.2694354 | 1.1124555  |             |                |
| DM08841P2 | 0.0706512  | 1.4545028  | 1.1606773  | -1.1101784 |             |                |
| DM06620P3 | 0.07067971 | -1.0258276 | 1.0437601  | 1.0729612  |             |                |
| DM09737P1 | 0.07068079 | -1.1017085 | 1.0970498  | -1.2123686 |             |                |
| DM00175P3 | 0.07069752 | 1.1477644  | -1.17277   | -1.1984512 | PYG         | XM_001650215.1 |
| DM00094P3 | 0.07072441 | -1.0420512 | 1.0025742  | 1.1234481  | LOC655613   | XM_962173.2    |
| DM05365P1 | 0.07080287 | 1.2084252  | 1.6731622  | 1.9056706  |             |                |
| DM11091P1 | 0.07082411 | -1.0430495 | 1.3212733  | -1.5322615 |             |                |
| DM04162P1 | 0.07092527 | -1.0711843 | 1.0838485  | -1.1375391 |             |                |
| DM06365P2 | 0.0709717  | 1.017921   | -1.0101469 | 1.1339315  |             |                |
| DM00833P2 | 0.07103122 | 1.208683   | 1.3361773  | 1.1540365  | LOC1000170  | XM_001370669.1 |
| DM12918P1 | 0.07107454 | 1.0023882  | -1.2833247 | -1.5369723 |             |                |
| DM05338P4 | 0.07110267 | 1.482625   | 1.1327655  | 1.2535907  |             |                |
| DM01381P3 | 0.07111603 | -1.0037459 | -1.1935325 | -1.262823  |             |                |
| DM00341P3 | 0.07124196 | -1.1425369 | -1.0682122 | -1.2968738 | LOC692795   | NM_001046642.1 |
| DM06521P1 | 0.07127878 | 3.123475   | 5.7851567  | 1.3626772  | RPL19       | NM_001043756.4 |
| DM14703P3 | 0.07137249 | 1.2843394  | 1.5646889  | -1.4949104 |             |                |
| DM13209P1 | 0.07140624 | 1.238204   | 1.2175776  | 1.2918427  |             |                |
| DM13350P2 | 0.07148847 | -1.0831987 | 1.0775622  | -1.1973394 | PF10_0234   | XM_001347482.1 |
| DM02828P2 | 0.0714997  | -1.1041306 | 1.0826452  | 1.1815634  | CPUORF30    | NM_001125181.1 |
| DM09828P2 | 0.07151293 | 1.2538756  | 1.2518766  | -1.0819519 |             |                |
| DM11322P1 | 0.07151807 | -1.0340946 | -1.0229421 | -1.3964187 |             |                |
| DM11512P1 | 0.07155049 | 1.2066264  | 1.2922403  | 1.1033742  |             |                |
| DM00123P3 | 0.07157726 | -1.2018946 | -1.083826  | -1.1547457 | LOC732999   | NM_001046995.2 |
| DM04074P1 | 0.07162586 | -1.4366282 | -1.2190847 | -2.1512284 |             |                |
| DM02941P3 | 0.07166328 | -1.1500468 | 1.0341389  | -1.2666231 |             |                |
| DM07182P2 | 0.07167668 | 1.274061   | 1.7267505  | -1.1402795 |             |                |
| DM03086P2 | 0.07173583 | 1.1194662  | 1.2328641  | 1.000867   |             |                |
| DM00213P1 | 0.07173783 | -1.0383853 | 1.1077889  | -1.2835262 | DGRIV\GH229 | XM_001995128.1 |
| DM08551P1 | 0.07177001 | -1.2300987 | -1.1701754 | -1.2341048 |             |                |
| DM00117P3 | 0.07191621 | -1.078612  | -1.2798792 | -1.7669542 | DVIR\GJ2276 | XM_002054476.1 |
| DM01480P1 | 0.07193625 | -1.0561578 | -1.0254725 | -1.2404927 |             |                |
| DM01914P2 | 0.0719785  | -1.0729495 | -1.1797444 | -1.1236452 | LOC409581   | XM_393085.3    |
| DM08873P4 | 0.07215089 | -1.0229076 | 1.0175238  | 1.177533   |             |                |
| DM09577P1 | 0.07216111 | 1.6135763  | 1.9126318  | 1.3313203  |             |                |
| DM09720P1 | 0.0721777  | 1.0508705  | -1.093049  | 1.273571   |             |                |
| DM06325P3 | 0.07217885 | -1.1382588 | 1.1519078  | 1.0309801  |             |                |
| DM01754P1 | 0.07220159 | -1.0146701 | -1.0034322 | 1.0385392  | RPL17L      | XM_001231653.1 |
| DM01345P1 | 0.07228693 | 1.1587307  | 1.0741742  | -1.012897  | CG31116     | NM_176462.1    |
| DM10197P1 | 0.07234934 | 1.1967634  | -1.127428  | -1.321625  |             |                |
| DM10542P3 | 0.07236357 | 1.2420063  | 1.4482453  | 1.2065505  |             |                |
| DM03426P2 | 0.07236636 | -1.1880283 | 1.0215466  | -1.3622715 |             |                |
| DM10187P2 | 0.07238641 | -1.7407866 | -1.6091546 | -1.698761  |             |                |
| DM00061P1 | 0.07242988 | 1.1195221  | 1.2435465  | -1.0765471 | LOC413877   | XM_397316.3    |

|           |            |            |            |            |             |                    |
|-----------|------------|------------|------------|------------|-------------|--------------------|
| DM06957P3 | 0.07244811 | 1.2676083  | 1.1722343  | 1.6052117  |             |                    |
| DM00305P3 | 0.07245518 | -1.0312754 | -1.1524967 | -1.2299601 | NRX-IV      | XM_001650696.1     |
| DM04683P1 | 0.07251545 | 1.3120104  | 2.5920608  | 1.2868773  |             |                    |
| DM06736P3 | 0.07251617 | 1.1507859  | 1.1373858  | -1.1127561 | PF13_0050   | XM_001349786.1     |
| DM01885P3 | 0.07253842 | -1.1485922 | 1.0270215  | 1.1817358  | LOC1000315  | XM_001380757.1     |
| DM01142P3 | 0.07254714 | -1.2123008 | -1.3371003 | -1.303156  | LOC552295   | XM_624671.2        |
| DM11614P1 | 0.07257224 | 1.0970824  | 1.0241033  | 1.345643   |             |                    |
| DM07472P2 | 0.07259243 | -1.0557891 | 1.0054723  | -1.2222629 |             |                    |
| DM14501P2 | 0.07260829 | 1.1677536  | -1.2042181 | 1.1960107  |             |                    |
| DM09650P2 | 0.07270826 | 1.2249273  | 1.0779164  | 1.0824273  |             |                    |
| DM14943P1 | 0.07272771 | 1.0015599  | -1.0223137 | 1.1622691  |             |                    |
| DM14077P3 | 0.07291505 | 1.4304715  | 2.0059967  | 1.3511785  |             |                    |
| DM05998P2 | 0.07296348 | -1.1073201 | -1.0848969 | -1.3118312 | LOC413669   | XM_397110.3        |
| DM05370P2 | 0.07299998 | -1.1855528 | -1.3392009 | -1.1064585 |             |                    |
| DM04457P3 | 0.07310385 | 1.4043288  | 1.7333694  | -1.0332848 |             |                    |
| DM07820P1 | 0.07310874 | 1.0924826  | 1.2455319  | -1.0429815 |             |                    |
| DM14727P1 | 0.07310966 | 1.0554086  | 1.1673738  | 1.0761049  |             |                    |
| DM05053P1 | 0.07312624 | 1.0329295  | 1.0077825  | 1.3010043  | LOC662470   | XM_968562.2        |
| DM12211P1 | 0.07320313 | 1.1134953  | 1.0928068  | 1.3483018  |             |                    |
| DM06349P3 | 0.07327275 | 1.0274278  | 1.3853012  | 1.5171809  |             |                    |
| DM00934P1 | 0.07329305 | 1.2781107  | -1.3092887 | -1.0892959 | BRAFLDRAFT  | XM_002605961.1     |
| DM13072P1 | 0.07330544 | 1.0424123  | 1.146991   | 1.248916   |             |                    |
| DM03175P2 | 0.07333654 | 1.4516877  | 1.444144   | 2.0810997  |             |                    |
| DM00740P2 | 0.07346908 | -1.3017076 | -1.2102051 | -1.1451994 | AAEL_AAEL   | LOC XM_001654924.1 |
| DM08440P1 | 0.07356692 | 1.2139518  | 1.1593807  | -1.048061  |             |                    |
| DM12557P3 | 0.0736737  | 1.0114973  | -1.1850574 | -1.2868068 |             |                    |
| DM06092P3 | 0.07373076 | -1.1106821 | 1.0466843  | -1.184381  | LOC1002009  | XM_002162465.1     |
| DM11248P1 | 0.0737351  | 1.6394296  | -1.6295819 | 2.3209083  | E1012E08.TM | XM_001238744.1     |
| DM07436P3 | 0.07374838 | 1.1668329  | 1.488331   | -1.275966  |             |                    |
| DM02964P2 | 0.07378643 | 1.12399    | 1.02782    | 1.2406001  |             |                    |
| DM14186P3 | 0.07378731 | -1.1152784 | 1.0311028  | 1.41095    |             |                    |
| DM11493P2 | 0.07380846 | 1.006355   | 1.0273124  | 1.235217   |             |                    |
| DM13704P2 | 0.07381257 | 1.0027016  | 1.1752174  | 1.2674987  |             |                    |
| DM09003P3 | 0.07384556 | -2.4119933 | -1.290002  | -7.4059324 |             |                    |
| DM10617P1 | 0.07384932 | -1.0291864 | 1.0364857  | -1.1127027 |             |                    |
| DM14642P2 | 0.07391216 | -1.1924485 | 1.1071513  | 1.2319424  |             |                    |
| DM12674P2 | 0.07393432 | -1.0885665 | 1.5840125  | -1.5880435 |             |                    |
| DM05477P2 | 0.07408462 | 1.0095667  | 1.0407581  | -1.2563745 |             |                    |
| DM03940P4 | 0.07409746 | 1.1550183  | 1.3653113  | 1.4441358  |             |                    |
| DM07302P1 | 0.07411428 | 1.0272275  | -1.0102843 | -1.1194117 |             |                    |
| DM08608P3 | 0.07412767 | -1.1693192 | -1.3409916 | -1.0348073 |             |                    |
| DM05860P2 | 0.07417426 | 1.6280037  | -1.9184034 | 1.7391286  | LOC1001597  | XM_001944692.1     |
| DM03819P1 | 0.07424317 | 1.7085475  | 1.7107847  | 1.0782752  |             |                    |
| DM08450P3 | 0.07431956 | -1.126966  | 1.0341581  | -1.0944364 |             |                    |
| DM12621P2 | 0.07439261 | 1.5757531  | 1.3505635  | 1.3941981  |             |                    |
| DM02246P2 | 0.0744089  | -1.077823  | 1.0527931  | -1.2201754 | LOC408301   | XM_391852.3        |
| DM14549P1 | 0.07441691 | -1.0512993 | 1.1748471  | 1.3271233  |             |                    |
| DM13639P3 | 0.07449743 | -1.265579  | -1.1269867 | -1.2483994 |             |                    |
| DM08326P2 | 0.07452536 | -1.1254735 | -1.0169204 | -1.1786734 |             |                    |
| DM12391P3 | 0.07454388 | -1.2142488 | -1.1992956 | -1.1293691 |             |                    |

|           |            |            |            |            |             |                |
|-----------|------------|------------|------------|------------|-------------|----------------|
| DM01680P2 | 0.07455403 | 1.0258263  | -1.0514499 | -1.3823977 | DWIL\GK250! | XM_002071555.1 |
| DM02529P2 | 0.07455757 | 1.1437857  | -1.0161226 | -1.0262195 | LOC1002261! | XM_002193330.1 |
| DM07172P2 | 0.07458374 | -1.0655886 | -1.2624582 | 1.0151906  |             |                |
| DM11487P2 | 0.0745905  | 1.0895332  | 1.0395392  | -1.2118185 |             |                |
| DM00988P3 | 0.07462959 | -1.1441364 | -1.2438136 | -1.4138467 | HSPD1       | XM_001652304.1 |
| DM02757P4 | 0.07464907 | -1.1892514 | -1.0069886 | -1.0724628 | EIF4E       | NM_001095743.1 |
| DM05824P1 | 0.07465036 | 1.464284   | 1.2822194  | -1.3397545 | NDEL1       | XM_855504.1    |
| DM03546P1 | 0.07468474 | -1.041917  | -1.4731882 | -1.233802  |             |                |
| DM05369P3 | 0.0747185  | -1.0084455 | 1.2870308  | -1.5055052 | NEMVEDRAFT  | XM_001624696.1 |
| DM10808P3 | 0.07472309 | 1.0837208  | -1.4044474 | -1.4210014 |             |                |
| DM09774P1 | 0.0747538  | 1.0871665  | 1.1051689  | 1.2557683  |             |                |
| DM10896P3 | 0.07480452 | -1.454662  | -1.2467037 | -1.2431593 |             |                |
| DM07198P3 | 0.07482301 | -1.0225847 | 1.0043788  | -1.3139321 |             |                |
| DM14353P1 | 0.07489266 | 1.0342888  | 1.2030982  | 1.2042292  |             |                |
| DM10018P2 | 0.0749454  | 1.257936   | 1.371526   | 1.5437524  |             |                |
| DM06941P3 | 0.07498311 | 1.5757746  | 2.319545   | 1.2291485  |             |                |
| DM05685P1 | 0.07499138 | 1.001896   | -1.1839569 | -1.1916311 |             |                |
| DM08268P3 | 0.07510761 | 1.0718949  | -1.4847215 | -1.0861517 |             |                |
| DM13134P1 | 0.07512784 | 1.1224514  | -1.0662923 | -1.2885396 |             |                |
| DM01770P1 | 0.07513726 | -1.2693722 | -1.10092   | 1.0580267  | LOC661302   | XM_001814135.1 |
| DM08115P3 | 0.07517481 | -1.0877868 | -2.0018744 | 3.1389434  |             |                |
| DM04226P2 | 0.07523302 | 1.224867   | 1.1411523  | 1.5680255  |             |                |
| DM05870P1 | 0.07523873 | 1.2068739  | 1.510462   | 1.3223231  | DANA\GF166  | XM_001954656.1 |
| DM13053P1 | 0.07524221 | -1.0079826 | 1.1466614  | 1.3426757  |             |                |
| DM02080P3 | 0.07526694 | -1.1153927 | -1.1066349 | -1.2709126 | TRIP1       | XM_392780.3    |
| DM01528P2 | 0.07527647 | -1.1376932 | -1.1650667 | -1.3911439 | NEMVEDRAFT  | XM_001632257.1 |
| DM04512P3 | 0.07530995 | -1.2583885 | -1.1848553 | -1.3889384 | DVIR\GJ2245 | XM_002050975.1 |
| DM02151P1 | 0.07536397 | -1.3272086 | -1.4238893 | -1.2055546 | DGRI\GH200! | XM_001987247.1 |
| DM06355P2 | 0.07536785 | 1.1228946  | 1.2387507  | 1.3627441  |             |                |
| DM09031P1 | 0.07537168 | 1.4073057  | 1.5072566  | 1.6230211  |             |                |
| DM03074P4 | 0.07537621 | -1.1971548 | -1.147025  | -1.2253255 | DANA\GF156  | XM_001962814.1 |
| DM07490P1 | 0.07538848 | -1.0138745 | 1.1737884  | 1.2919124  | LOC1001362! | NM_001124521.1 |
| DM00390P1 | 0.07552186 | -1.0718713 | -1.154834  | -1.2193217 | COPG2       | XM_414981.2    |
| DM13914P3 | 0.07556071 | -1.2512774 | 1.1453925  | 1.2307998  |             |                |
| DM12756P4 | 0.07559156 | 1.0075244  | 1.0996419  | 1.292033   |             |                |
| DM05890P3 | 0.07565188 | 1.2310939  | 1.0419533  | -1.3059721 |             |                |
| DM05287P3 | 0.07565911 | -1.0408285 | -1.028266  | -1.3822988 |             |                |
| DM07051P3 | 0.07572757 | -1.2752702 | -1.3493469 | 1.4254187  |             |                |
| DM11593P2 | 0.07572996 | -1.0814955 | 1.0792289  | 1.3770022  |             |                |
| DM08361P1 | 0.07575188 | 1.1250459  | 1.1849201  | 1.1300638  |             |                |
| DM02258P2 | 0.07578054 | -1.097844  | -1.0933355 | -1.0122602 | MGC84267    | NM_001094273.1 |
| DM09230P4 | 0.07579582 | -1.0246481 | -1.1345639 | -1.1268355 |             |                |
| DM03082P1 | 0.0758271  | -1.2925651 | 1.0432227  | -1.3519601 | LOC1000517: | XR_036026.2    |
| DM04748P2 | 0.07584429 | -1.3946863 | -1.5314851 | -1.3186573 |             |                |
| DM12563P3 | 0.07585104 | 1.0146185  | 1.1407413  | 1.130875   | LOC1000177: | XM_001371154.1 |
| DM09219P1 | 0.07589328 | 1.4370946  | 1.5662873  | 1.5717282  |             |                |
| DM11764P4 | 0.07589723 | 1.0173708  | 1.0809284  | -1.230829  |             |                |
| DM10984P1 | 0.07590443 | -1.248486  | 1.0425965  | -1.3641583 |             |                |
| DM05411P3 | 0.07590898 | 1.0384829  | 1.0466709  | -1.106921  |             |                |
| DM00222P2 | 0.07599639 | -1.0430926 | -1.0556642 | -1.3446314 | AGAP_AGAP0  | XM_317781.4    |

|           |            |            |            |            |                             |
|-----------|------------|------------|------------|------------|-----------------------------|
| DM11025P4 | 0.07613763 | 1.1094921  | 1.043418   | -1.1496117 |                             |
| DM00127P1 | 0.07621838 | -1.0263093 | 1.1269968  | -1.0258341 | LOC1001686(XM_001950330.1   |
| DM07125P3 | 0.07622646 | -1.445914  | -1.0306267 | -1.1549591 |                             |
| DM13379P4 | 0.07623981 | -1.0792663 | -1.2389071 | 1.2477179  |                             |
| DM08922P1 | 0.07627244 | -1.1550457 | -1.061891  | -1.2022227 |                             |
| DM07574P1 | 0.07627556 | -1.1760191 | -1.0797633 | -1.3578682 |                             |
| DM14775P2 | 0.07628836 | -1.2000418 | -1.750107  | 1.0758872  |                             |
| DM08544P1 | 0.07631508 | -1.0042886 | -1.1366277 | 1.6002355  |                             |
| DM01992P1 | 0.07642727 | -1.2809646 | -1.2674937 | 1.0217651  | LOC1002239 XM_002198611.1   |
| DM03345P1 | 0.07645463 | -1.0226495 | -1.2689719 | -1.3362583 |                             |
| DM09138P1 | 0.07646556 | 1.1720691  | -1.4109048 | -1.6401707 |                             |
| DM12572P1 | 0.07648105 | -1.1521529 | -1.000821  | 1.0669379  |                             |
| DM07718P1 | 0.07652631 | -1.0961264 | 1.0587339  | 1.2435223  |                             |
| DM14285P1 | 0.07654035 | -1.2400278 | -1.0998435 | -1.2393504 |                             |
| DM07963P1 | 0.07654201 | 1.1767789  | 1.4322782  | 1.3186115  |                             |
| DM14527P3 | 0.0765471  | -1.0885509 | -1.3842777 | -1.1254064 |                             |
| DM11429P3 | 0.07655501 | 1.1251415  | 1.2703487  | 1.2839053  |                             |
| DM03576P4 | 0.07658135 | -1.0498575 | -1.3302953 | -1.3152903 |                             |
| DM10429P3 | 0.07660262 | -1.1272591 | -1.2624573 | 1.7531201  |                             |
| DM01112P2 | 0.07660604 | 1.0176843  | 1.0293802  | 1.2655215  | DSIM\GD176 XM_002076525.1   |
| DM02852P3 | 0.07667253 | -1.1326634 | 1.8001184  | 2.0715764  | DSEC\GM149 XM_002042592.1   |
| DM09221P1 | 0.07678203 | -1.1480206 | -1.1970236 | -1.6183343 |                             |
| DM03637P1 | 0.07682577 | -1.0980158 | 1.0283289  | -1.3557876 | DGRI\GH110(XM_001988258.1   |
| DM00782P1 | 0.07686224 | -1.0657259 | -1.262314  | -1.4014901 | LOC1000744 XM_001506404.1   |
| DM11010P3 | 0.07688362 | -1.108456  | -1.2412695 | -1.099817  | CPIPJ_CPIJOC XM_001848769.1 |
| DM07298P3 | 0.07688513 | 1.1883943  | 1.4847516  | 1.610777   |                             |
| DM05827P3 | 0.07690561 | -1.3724253 | -1.4528985 | -1.1941595 |                             |
| DM14118P3 | 0.07690561 | -1.4158252 | -1.5144666 | 1.0958543  |                             |
| DM10630P1 | 0.07709853 | -1.2086021 | -1.1652617 | -1.3733871 |                             |
| DM09743P4 | 0.07710668 | 1.1957526  | 1.207082   | 1.1649982  |                             |
| DM06198P2 | 0.07711773 | 1.0597049  | 1.1593399  | 1.3645146  |                             |
| DM05903P1 | 0.07712467 | 1.1126122  | 1.0572827  | -1.1121265 | SHRB XM_395324.3            |
| DM03095P2 | 0.07713177 | 1.1456145  | 1.1545666  | -1.275292  | NFYC NM_001139789.1         |
| DM07105P4 | 0.07714642 | -1.0300943 | 1.2231417  | -1.3083069 |                             |
| DM00733P3 | 0.07719326 | 1.1203446  | 1.2105347  | 1.1884589  | DYAK\GE154(XM_002101636.1   |
| DM00361P1 | 0.07729226 | -1.0353523 | -1.1143901 | 1.1467531  | DGRI\GH123(XM_001990889.1   |
| DM04420P2 | 0.07732038 | -1.095144  | -2.1647663 | -1.0145533 |                             |
| DM12274P3 | 0.07732323 | 1.3071771  | 1.3320532  | 1.4497947  |                             |
| DM00054P1 | 0.07735177 | 1.8219116  | 2.019344   | 1.5156013  |                             |
| DM08954P2 | 0.07735701 | 1.065993   | -1.1716586 | -1.4184619 |                             |
| DM12534P4 | 0.07737718 | -1.3082762 | -1.0997409 | 1.0972571  |                             |
| DM09956P2 | 0.07738749 | -1.1762178 | -1.0607682 | -1.6944858 |                             |
| DM10047P3 | 0.07739928 | 1.0069482  | 1.001859   | 1.2348653  |                             |
| DM04351P3 | 0.07740071 | -1.0157118 | 1.0909117  | -1.084779  |                             |
| DM03939P3 | 0.07740802 | 1.227279   | 1.2194958  | -1.0272261 |                             |
| DM10135P1 | 0.07742465 | -1.0438331 | -1.1030704 | -1.3873507 |                             |
| DM11623P2 | 0.07745805 | 1.285208   | 1.2083962  | -1.094659  |                             |
| DM11055P3 | 0.07748862 | 1.2108307  | 1.2182603  | 1.1643096  |                             |
| DM12152P3 | 0.07750826 | -1.1465567 | -1.1411501 | -1.15726   |                             |
| DM06010P3 | 0.07751035 | -1.15616   | -1.0479023 | 1.1191958  | LOC1001011(NM_001099621.1   |

|            |            |            |            |            |            |                |
|------------|------------|------------|------------|------------|------------|----------------|
| DM09764P4  | 0.07754196 | -1.0862107 | 1.2102462  | -1.0871645 |            |                |
| DM00653P1  | 0.07755993 | 1.2164539  | -1.1648786 | -1.3855683 | DPER\GL210 | XM_002023148.1 |
| DM04828P3  | 0.07756527 | 8.056958   | 18.841953  | 1.0767858  |            |                |
| DM02139P1  | 0.07762145 | 1.2045883  | -1.0075505 | -1.0699325 | DYAK\GE221 | XM_002095060.1 |
| DM14154P1  | 0.07763851 | -1.2227471 | 1.0211535  | 1.2535075  |            |                |
| DM10973P2  | 0.07767633 | 1.0854105  | 1.1235834  | -1.1034876 |            |                |
| DM00001P3  | 0.07768489 | 1.1190977  | -1.3513374 | 1.2143611  | DWIL\GK196 | XM_002062799.1 |
| DM02875P2  | 0.07771324 | -1.205377  | 1.2891495  | 1.130141   | LOC1001169 | XM_001601275.1 |
| DM13913P1  | 0.07781085 | -1.111635  | -1.3181473 | 1.1887236  |            |                |
| DM05676P1  | 0.07781458 | -1.2500669 | -1.015572  | -1.2352916 |            |                |
| DM01433P3  | 0.0778327  | -1.0265666 | -1.1431375 | -1.2392815 | DERE\GG216 | XM_001974250.1 |
| DM12276P1  | 0.07783617 | 1.0389948  | -1.0161185 | -1.4271301 |            |                |
| DM11968P1  | 0.0779056  | -1.0314286 | 1.010849   | -1.1960442 |            |                |
| DM01817P1  | 0.07795783 | -1.0394074 | -1.1384717 | 1.4292285  | ACT57B     | NM_079076.3    |
| DM02028P3  | 0.07797133 | -1.0617043 | -1.2246568 | -1.1753004 | AIFM1      | NM_001017244.2 |
| DM05965P2  | 0.07798422 | -1.2587849 | -1.2657425 | -1.2264956 |            |                |
| DM12662P1  | 0.07798637 | 1.3745042  | 1.451659   | 1.3252438  |            |                |
| DM14831P4  | 0.07806537 | -1.0469228 | -1.3904285 | 1.1056057  | DWIL\GK127 | XM_002068150.1 |
| DM14370P2  | 0.07816334 | -1.2002755 | 1.0232556  | 1.1011014  |            |                |
| DM06977P1  | 0.07819178 | -1.0218107 | -1.5059247 | 1.2774882  |            |                |
| DM08677P3  | 0.07820521 | 1.3371747  | 1.3356354  | 1.1053665  |            |                |
| DM14345P3  | 0.07823956 | -1.3674614 | -1.3000096 | -1.0033275 |            |                |
| DM00641P1  | 0.07827219 | 1.1033646  | -1.3230621 | 1.0464422  | LOC1001647 | XM_001946377.1 |
| DM07104P1  | 0.07831867 | -1.1304386 | -2.0176027 | 2.2008612  |            |                |
| DM05461P1  | 0.07839112 | 1.1769612  | -1.329713  | -1.0897866 |            |                |
| DM06648P4  | 0.07842816 | -1.019317  | 1.0975587  | 1.5810822  |            |                |
| DM12596P2  | 0.07844912 | 1.1855762  | 1.150512   | 1.195664   |            |                |
| DM04577P1  | 0.07848778 | -1.051676  | -1.2721957 | 1.1554874  |            |                |
| DM14984P1  | 0.07854261 | -1.1104982 | -1.0341719 | 1.28763    |            |                |
| DM07604P2  | 0.07856679 | 2.7161212  | 5.200465   | 2.8349257  |            |                |
| DM07052P1  | 0.07863088 | -1.1720762 | -1.3497955 | 1.2410297  |            |                |
| DM05738P2  | 0.07868785 | -1.1065029 | 1.2166194  | 1.3185811  |            |                |
| DM111135P1 | 0.07869135 | 1.0581328  | -1.4343662 | 1.3427172  |            |                |
| DM15163P2  | 0.07871212 | 1.6252487  | -1.7889543 | 2.885132   |            |                |
| DM12264P3  | 0.07873934 | -1.0965947 | 1.0485884  | 1.0856519  |            |                |
| DM10357P1  | 0.07876671 | -1.4296488 | -1.4498607 | -1.2809329 |            |                |
| DM12758P3  | 0.07879632 | 1.071598   | 1.5923237  | 1.8597846  |            |                |
| DM05464P1  | 0.07882609 | -1.1070906 | 1.0767007  | -1.4737961 |            |                |
| DM08496P1  | 0.07884823 | -1.167612  | -1.1268673 | -1.3586196 |            |                |
| DM14175P3  | 0.07890181 | -1.1428171 | -1.1363398 | 1.2017496  |            |                |
| DM03731P1  | 0.07890227 | 1.179564   | -1.1561017 | 1.3139564  | LOC655107  | XM_961618.2    |
| DM07912P1  | 0.07891116 | -1.2225038 | -1.0793401 | 1.0910293  |            |                |
| DM03717P1  | 0.0789406  | -1.0062487 | 1.132671   | 1.1342794  | UBE2M      | NM_001093496.1 |
| DM03224P2  | 0.07895662 | -1.0250219 | 1.1764636  | -1.128404  | LOC1001222 | XM_001605770.1 |
| DM15116P2  | 0.07899445 | 1.1516438  | -1.4499397 | 1.6359035  |            |                |
| DM03908P4  | 0.07900292 | -1.031849  | 1.0283041  | -1.1892352 |            |                |
| DM08229P4  | 0.07906503 | -1.0692798 | 1.028186   | -1.3290912 |            |                |
| DM01554P2  | 0.07906757 | 1.1565537  | 1.0036733  | -1.0882211 |            |                |
| DM01901P4  | 0.07911316 | -1.1731952 | -1.2200567 | -1.252109  | NEMVEDRAFT | XM_001628947.1 |
| DM09502P3  | 0.07913831 | 1.1272082  | -1.4964222 | 1.2538972  |            |                |

|           |            |            |            |            |            |                |
|-----------|------------|------------|------------|------------|------------|----------------|
| DM01105P3 | 0.07918114 | 1.1137911  | 1.0602244  | -1.0343868 | LOC660507  | XM_966734.1    |
| DM05729P1 | 0.07918968 | 1.0952787  | 1.1572554  | -1.22966   |            |                |
| DM08515P2 | 0.07921749 | -1.306987  | -1.0465683 | 1.1704597  |            |                |
| DM14609P1 | 0.0792332  | -1.1027045 | -1.1084173 | 1.347515   |            |                |
| DM12169P1 | 0.07927077 | -1.1291429 | -1.3123122 | -1.5569792 |            |                |
| DM10505P2 | 0.07927389 | 1.1421838  | 1.2147529  | 1.0075917  |            |                |
| DM05132P3 | 0.07927575 | 1.2788237  | 1.2537693  | 1.2128116  |            |                |
| DM10994P1 | 0.07928514 | 1.0900159  | -1.0204536 | -1.1853637 |            |                |
| DM09559P1 | 0.07937633 | -1.2412891 | -1.1544915 | 1.0783153  |            |                |
| DM08750P3 | 0.07939704 | -1.1052661 | -1.0045419 | -1.1321931 |            |                |
| DM10666P2 | 0.07942232 | 1.318932   | 1.2061595  | 1.3511779  |            |                |
| DM02209P2 | 0.07949047 | 1.0167953  | -1.0656089 | -1.3088804 | TRIADDRAFT | XM_002108999.1 |
| DM05280P3 | 0.07952071 | -1.1529171 | 1.2451265  | 1.731869   |            |                |
| DM02220P3 | 0.07953204 | 1.0665435  | -1.0016657 | -1.1629068 | CG3590     | NM_142329.3    |
| DM07676P1 | 0.07954484 | 1.0008483  | 1.2666359  | 1.2581935  |            |                |
| DM10091P3 | 0.07954545 | -1.1857666 | 1.2130753  | 1.0812458  |            |                |
| DM05410P3 | 0.07960282 | -1.135475  | -1.2597206 | 1.7031484  |            |                |
| DM02530P3 | 0.07963169 | 1.131526   | 1.0756875  | -1.1975787 | LOC1000884 | XM_001518050.1 |
| DM14554P1 | 0.07966656 | -1.0544032 | -1.0105736 | 1.0664238  |            |                |
| DM15289P2 | 0.07978673 | -1.1310852 | -1.440723  | 1.3688124  |            |                |
| DM06535P1 | 0.07987282 | 1.1033341  | 1.0358804  | 1.09961    |            |                |
| DM13162P3 | 0.07990344 | -1.0662366 | 1.0666485  | 1.1782956  |            |                |
| DM13118P1 | 0.07990501 | 1.0842566  | 1.7619053  | 1.0849472  |            |                |
| DM10768P3 | 0.07992108 | -1.0111996 | -1.0130643 | -1.2369547 | DGRI\GH169 | XM_001985222.1 |
| DM11111P2 | 0.07995772 | 1.2101915  | 1.0917492  | 1.3451031  |            |                |
| DM06286P1 | 0.07996248 | 1.0438224  | -1.1208762 | -1.0072864 | OTUD3      | NM_212922.1    |
| DM11601P2 | 0.08005212 | -1.1743886 | -1.0421975 | -1.2635063 |            |                |
| DM06083P3 | 0.080143   | -1.2046156 | -1.1733896 | -1.0201193 |            |                |
| DM00609P1 | 0.08014624 | -1.0110532 | -1.146509  | -1.1574147 | LOC1000089 | NM_001082172.1 |
| DM06523P3 | 0.08015529 | -1.5643045 | -1.2233769 | 1.5404431  | GUA1       | XM_001701936.1 |
| DM13642P1 | 0.08024061 | -1.251445  | -1.1206547 | 1.1058166  |            |                |
| DM07823P3 | 0.08024223 | -1.064494  | 1.0907247  | -1.2074891 |            |                |
| DM03902P4 | 0.08025805 | 1.1129805  | -1.080637  | -1.1065899 |            |                |
| DM00196P3 | 0.08028502 | 1.0798829  | -1.0281996 | -1.1191143 | CAPN7      | NM_001135108.1 |
| DM14351P2 | 0.08030918 | -1.1384223 | 1.0215156  | -1.263535  |            |                |
| DM00849P4 | 0.08031432 | -1.1870065 | 1.0487528  | -1.1098412 |            |                |
| DM00306P4 | 0.0803205  | -1.0090914 | -1.0319079 | -1.228244  | LOC1002186 | XM_002189073.1 |
| DM10704P2 | 0.08032935 | -1.0136212 | 1.1875191  | 1.131652   |            |                |
| DM10576P2 | 0.08033554 | -1.3349979 | 1.0227624  | -1.9763544 |            |                |
| DM08910P1 | 0.08043492 | -1.2989738 | -1.1838909 | -1.032935  |            |                |
| DM08919P2 | 0.08047071 | 1.0659261  | -1.303617  | -1.0701021 |            |                |
| DM00660P3 | 0.0805062  | -1.1712914 | -1.4392487 | -1.4285249 | PGM1       | NM_001086703.1 |
| DM08137P3 | 0.08058373 | 1.3766097  | 2.138743   | 1.4168478  |            |                |
| DM10797P3 | 0.08060102 | -1.1146636 | 1.0527372  | -1.2034149 |            |                |
| DM07902P1 | 0.08062621 | 1.0364577  | 1.0983295  | 1.8015578  |            |                |
| DM08907P2 | 0.08065555 | -1.6708487 | 1.033508   | -8.204917  |            |                |
| DM02851P1 | 0.08069331 | 1.3488157  | -1.2664157 | 2.067401   |            |                |
| DM04846P3 | 0.08072272 | 1.2568716  | 1.2476708  | 1.3464806  | DGRI\GH136 | XM_001993025.1 |
| DM04876P2 | 0.08073383 | 1.2960265  | -2.2398746 | -1.2587907 |            |                |
| DM01407P1 | 0.08076904 | -1.1316998 | -1.1450685 | -1.1548911 | DKC1       | XM_002131836.1 |



|            |            |            |            |            |              |                |
|------------|------------|------------|------------|------------|--------------|----------------|
| DM04542P1  | 0.0808009  | -1.0174996 | 1.21106    | -1.0727246 | LOC724261    | XM_001120053.1 |
| DM05609P1  | 0.08081123 | -1.1154789 | -1.4695591 | -1.2729628 | LOC661567    | XM_967718.2    |
| DM08357P1  | 0.08083619 | 1.5134462  | 1.4143394  | 1.6245267  |              |                |
| DM06805P2  | 0.08090571 | 1.0335813  | 1.1355715  | 1.2463073  |              |                |
| DM03497P2  | 0.08092232 | -1.1296188 | -1.1630063 | -1.4460042 |              |                |
| DM15341P1  | 0.08096694 | -1.2325336 | -1.1293442 | -1.0928012 |              |                |
| DM02307P1  | 0.08100615 | 1.1461949  | -1.2803073 | -1.1127195 | DANA\GF207   | XM_001964286.1 |
| DM09427P3  | 0.0810507  | 1.1317729  | 1.2436756  | 1.3672944  |              |                |
| DM111170P1 | 0.08106539 | -1.1048343 | 1.0969415  | -1.240366  |              |                |
| DM01764P3  | 0.08121765 | -1.0060533 | 1.2310717  | -1.0846056 | ZGC:109885   | NM_131263.1    |
| DM11790P4  | 0.08123833 | 1.1006535  | 1.1077429  | 1.1223412  |              |                |
| DM08299P4  | 0.08127516 | 1.2384411  | 1.3603891  | 1.3033663  |              |                |
| DM03890P1  | 0.08128405 | -1.1205468 | -1.0615344 | -1.354993  |              |                |
| DM05466P1  | 0.08133752 | -1.1585776 | -1.0268472 | -1.2087297 | LOC1002071   | XM_002158152.1 |
| DM01286P3  | 0.08134372 | 1.025425   | 1.2013366  | 1.3565186  | M18.6        | NM_069899.2    |
| DM02679P3  | 0.08141068 | -1.4292043 | -1.185793  | -1.0445588 |              |                |
| DM09706P1  | 0.08152607 | 1.013888   | 1.0958749  | 1.2677687  |              |                |
| DM01459P2  | 0.08153673 | -1.1352754 | -1.2277225 | -1.0460308 | CPIPJ_CPIJOC | XM_001843985.1 |
| DM12339P2  | 0.08154305 | -1.1366036 | 1.0010136  | 1.0915793  | LOC1000186   | XM_001367242.1 |
| DM13207P3  | 0.08161403 | -1.4678351 | -1.0550095 | 1.0422149  |              |                |
| DM14647P4  | 0.08164313 | -1.0475279 | 1.2172508  | 1.3813776  |              |                |
| DM10219P1  | 0.08173508 | 1.0033066  | -2.0296977 | -1.3699113 |              |                |
| DM12762P3  | 0.08178687 | 1.0537053  | 1.0314204  | -1.1747177 | AAEL_AAEL0C  | XM_001657816.1 |
| DM08646P1  | 0.08183971 | 1.0413594  | 1.0889754  | -1.1482477 |              |                |
| DM10564P3  | 0.08190435 | -1.135892  | 1.037889   | 1.4976948  |              |                |
| DM06556P1  | 0.08198966 | 1.2288418  | -1.1475612 | 1.1083927  |              |                |
| DM13620P3  | 0.08201605 | 1.1173049  | 1.3504688  | -1.1810625 |              |                |
| DM14206P3  | 0.08201845 | -1.039247  | 1.0517675  | 1.251776   |              |                |
| DM07829P4  | 0.0820504  | -1.1074252 | 1.0197088  | 1.2280939  |              |                |
| DM04762P3  | 0.08210306 | 1.29785    | -1.4979537 | 2.5632231  |              |                |
| DM11856P1  | 0.08210556 | -1.0922506 | -1.0006545 | 1.0855985  |              |                |
| DM00652P2  | 0.08217182 | 1.0910577  | -1.0534457 | 1.2595371  | TLN1         | NM_001009560.1 |
| DM10300P2  | 0.08221669 | 1.0702798  | -1.140824  | 1.3027498  |              |                |
| DM08557P1  | 0.08224309 | 1.1304197  | 1.2767204  | -1.2505677 |              |                |
| DM09211P1  | 0.08228511 | -1.3019849 | 1.3052391  | -1.8947366 | NEMVEDRAFT   | XM_001641195.1 |
| DM05012P1  | 0.08232591 | 1.2401906  | -1.1713175 | -1.0155356 |              |                |
| DM04761P2  | 0.08236924 | -1.1228559 | -1.1876676 | -1.3825881 | DERE\GG137   | XM_001972662.1 |
| DM11412P3  | 0.08240264 | 1.01529    | -1.0887351 | -1.1224519 |              |                |
| DM09741P2  | 0.08245666 | 1.1481761  | 2.2299159  | 1.0581157  |              |                |
| DM10227P2  | 0.0825105  | -1.1433464 | 1.1758628  | -1.0034583 |              |                |
| DM03670P3  | 0.08270656 | -1.2763567 | -1.06231   | -1.3030915 | EIF3E        | NM_001568.2    |
| DM01887P1  | 0.08272052 | 1.049635   | -1.1160185 | 1.1654164  | NS1BP        | XM_001866991.1 |
| DM10486P4  | 0.08273523 | 1.9654707  | 1.8547813  | 1.6122054  |              |                |
| DM09877P2  | 0.08280368 | 1.0066895  | -1.2619249 | -1.410833  |              |                |
| DM10142P2  | 0.08280454 | -1.6633716 | -1.6138724 | -1.0915196 |              |                |
| DM09575P2  | 0.08286034 | -1.122882  | -1.1309813 | -1.148858  |              |                |
| DM02890P1  | 0.08292452 | -1.2446434 | 1.1227354  | 1.5023685  |              |                |
| DM14459P1  | 0.08295762 | -1.5013878 | 1.1737037  | 1.1667796  |              |                |
| DM07455P3  | 0.08302654 | -1.1366433 | -1.0339301 | -1.0851023 |              |                |
| DM05087P4  | 0.08305913 | 1.1470945  | 1.0586697  | -1.1627373 |              |                |

|           |            |            |            |            |                            |
|-----------|------------|------------|------------|------------|----------------------------|
| DM08423P1 | 0.08306172 | -1.0002533 | 1.0306312  | 1.187178   |                            |
| DM04581P1 | 0.08311152 | -1.0284718 | -1.1450583 | 1.184106   |                            |
| DM08094P1 | 0.08312316 | 1.0485929  | -1.0816243 | 1.9321043  |                            |
| DM04715P3 | 0.08315805 | 1.0192108  | 1.1237223  | 1.0735958  |                            |
| DM15082P1 | 0.08323472 | 1.0869094  | 1.2841191  | -1.0672561 |                            |
| DM09561P4 | 0.08325151 | 3.986683   | 9.973929   | 1.411302   |                            |
| DM03516P2 | 0.08331724 | -1.0558031 | 1.1287444  | -1.0508395 | BC1G_01842 XM_001559636.1  |
| DM07262P1 | 0.08333376 | 1.0253453  | 1.1327671  | 1.2038465  |                            |
| DM11594P3 | 0.08334386 | 1.0211112  | 1.1459184  | -1.3630233 |                            |
| DM03402P1 | 0.08335927 | -1.0535719 | -1.1368303 | -1.1801976 |                            |
| DM13490P1 | 0.0834368  | 1.0445518  | -1.1644615 | 1.3766718  |                            |
| DM04116P2 | 0.08345935 | -1.2786939 | -1.0151138 | 1.1129192  |                            |
| DM14859P3 | 0.08350161 | 1.1150134  | -1.5349414 | 1.020348   |                            |
| DM02950P1 | 0.08350356 | -1.1312209 | 1.013817   | -1.0979257 | DVIR\GJ1808 XM_002057432.1 |
| DM03503P1 | 0.08351557 | -1.0945168 | -1.4051518 | -1.0551673 |                            |
| DM05626P1 | 0.08360281 | -1.192073  | -1.0745347 | -1.2381221 |                            |
| DM09990P1 | 0.08362372 | 1.0390505  | -1.276561  | 1.0469791  |                            |
| DM07429P2 | 0.08372683 | -1.0973787 | 1.0159465  | 1.3958983  |                            |
| DM10016P2 | 0.083766   | 2.0208647  | 1.386532   | 1.3361546  |                            |
| DM05587P2 | 0.08383384 | 1.2911971  | -1.4456332 | 1.0316727  |                            |
| DM03403P1 | 0.08384862 | -1.2019937 | -1.0557352 | 1.2685627  | SJAG_00451 XM_002171694.1  |
| DM00172P1 | 0.0838667  | -1.07455   | 1.1680454  | 1.0886292  | LOC579284 XM_779407.2      |
| DM05457P3 | 0.08389103 | -1.1843368 | -1.0155172 | -1.1292269 |                            |
| DM03458P2 | 0.08395598 | -1.274887  | -1.2878265 | 1.0315456  |                            |
| DM05775P3 | 0.08401476 | 1.5198967  | 1.208453   | 1.052472   |                            |
| DM01144P1 | 0.08407978 | 1.0397072  | -1.0097449 | -1.1317606 |                            |
| DM14621P1 | 0.08408941 | -1.0794301 | -1.8067915 | 3.2460477  |                            |
| DM07523P1 | 0.08409796 | -1.1369543 | 1.2544304  | -1.2045834 |                            |
| DM01905P2 | 0.08410461 | -1.0285327 | -1.160844  | -1.2528338 | EF-TU XM_001659276.1       |
| DM01841P4 | 0.08413657 | -1.0175704 | -1.0868791 | -1.3356031 | LOC664315 XM_970322.2      |
| DM09035P1 | 0.08414801 | 1.1475611  | -1.0650151 | -1.0945679 |                            |
| DM03241P2 | 0.08416587 | 1.10281    | 1.1198666  | -1.0616019 | DANA\GF219\XM_001966424.1  |
| DM14887P2 | 0.08426097 | -1.1251202 | -1.0387592 | 1.1582783  |                            |
| DM02201P3 | 0.08429795 | -1.1722529 | -1.1022071 | 1.1117543  | LOC1001628(XM_001950112.1  |
| DM09395P2 | 0.08430357 | -1.2584676 | 1.061124   | -1.0629541 |                            |
| DM02668P2 | 0.08431715 | 1.0081509  | -1.0604372 | -1.210797  | LOC589713 XM_001178070.1   |
| DM08687P2 | 0.08436075 | 1.1355375  | 1.3560573  | 1.0779631  |                            |
| DM06948P1 | 0.08437472 | -1.2366519 | -1.208427  | -1.2270403 |                            |
| DM09685P3 | 0.08439492 | -1.1934688 | -1.433643  | -1.1858083 |                            |
| DM11559P2 | 0.08441731 | -1.0187612 | -2.2730958 | -1.084018  |                            |
| DM11382P3 | 0.08452652 | -1.1129514 | -1.0160447 | 1.3961165  |                            |
| DM03381P3 | 0.08456502 | 1.001793   | -1.298543  | -1.0787767 |                            |
| DM13383P1 | 0.08466947 | -1.1302402 | -1.1514735 | 1.0127616  |                            |
| DM06308P3 | 0.08466969 | 1.201135   | 1.0856882  | -1.0053229 |                            |
| DM07195P1 | 0.084679   | -1.0014346 | -1.1792802 | -1.2450746 |                            |
| DM04969P1 | 0.08468507 | 1.1510102  | -1.4158263 | 1.1349956  |                            |
| DM03677P3 | 0.08471103 | -1.2315289 | -1.0768083 | -1.1289968 | DSEC\GM222 XM_002040608.1  |
| DM13200P2 | 0.08473184 | -1.0870941 | 1.0010074  | 1.231632   |                            |
| DM12514P1 | 0.08474411 | 2.0008168  | 4.158694   | 2.1413295  |                            |
| DM14946P1 | 0.08486027 | -1.0222588 | 1.049731   | -1.1103907 |                            |

|           |            |            |            |            |             |                |
|-----------|------------|------------|------------|------------|-------------|----------------|
| DM12638P1 | 0.08489175 | -1.1734414 | 1.0507348  | 1.0807245  |             |                |
| DM05665P2 | 0.08489636 | -1.1245698 | 1.0641118  | -1.0265243 |             |                |
| DM09157P1 | 0.08494043 | -1.1906917 | -1.0988859 | -1.4217616 |             |                |
| DM09452P3 | 0.08494218 | -1.632104  | -1.1601733 | -2.4113786 |             |                |
| DM11866P4 | 0.0850061  | 1.0144541  | -1.0223007 | -1.2749324 |             |                |
| DM12344P3 | 0.08502641 | 1.9140481  | 1.6063706  | 2.043825   |             |                |
| DM10764P3 | 0.08506867 | 1.0361949  | -1.0929483 | -1.0878279 |             |                |
| DM09591P3 | 0.08508422 | 1.187593   | 1.4715233  | 1.4035047  |             |                |
| DM01878P3 | 0.08509719 | 1.1179712  | 1.2373326  | 1.0904578  |             |                |
| DM11828P1 | 0.08524771 | 1.040687   | -1.0723516 | -1.1976035 |             |                |
| DM03282P3 | 0.08527871 | 1.3451563  | 1.0716137  | 1.0130935  |             |                |
| DM13193P1 | 0.08530371 | -1.1302645 | -1.0124079 | -1.0551392 | LOC409531   | XM_393037.3    |
| DM06633P1 | 0.08534536 | 1.053662   | -1.0755427 | -1.0571474 | FG02030.1   | XM_382206.1    |
| DM09155P1 | 0.08547747 | -1.0013268 | 1.5648515  | -1.0422914 |             |                |
| DM07901P3 | 0.08550788 | -1.0838257 | 1.0135368  | 1.2612356  |             |                |
| DM14405P1 | 0.08552781 | -1.4849255 | -1.0039502 | -1.2016486 |             |                |
| DM06158P4 | 0.0855458  | -1.3648051 | -1.2122937 | -1.2575585 |             |                |
| DM01005P2 | 0.08562981 | 1.9281772  | 1.1259677  | 1.0377995  | RPL13A      | XM_001692857.1 |
| DM04586P1 | 0.08565032 | 1.0659024  | -1.0455853 | -1.105355  |             |                |
| DM02612P1 | 0.08566269 | -1.0461708 | -1.0067142 | -1.2174788 | DANA\GF165  | XM_001954753.1 |
| DM08860P1 | 0.08568984 | 1.0024722  | -1.2045763 | 1.6394731  |             |                |
| DM04454P3 | 0.08570897 | 1.5042472  | -1.3080714 | 1.304222   | PC108343.00 | XM_738759.1    |
| DM02496P3 | 0.08574088 | 1.698415   | 1.9399968  | 1.1380956  | BRAFLDRAFT  | XM_002602063.1 |
| DM09616P1 | 0.08574614 | -1.0118941 | 1.4992139  | 1.2479497  |             |                |
| DM04175P3 | 0.08574829 | -1.4738688 | -1.0429178 | 1.1009543  | LOC797456   | XM_001337881.2 |
| DM14133P3 | 0.08580623 | -1.331953  | 1.0444901  | -1.1252694 |             |                |
| DM08204P1 | 0.085875   | 1.015634   | 1.0272777  | -1.506924  |             |                |
| DM03393P2 | 0.08593843 | 1.1752863  | 1.1920991  | -1.5893208 |             |                |
| DM04204P2 | 0.08596814 | -1.0506898 | -1.0929707 | -1.1840798 | TUB         | XM_001560987.1 |
| DM11535P2 | 0.08596881 | 1.1462094  | 1.0189376  | 1.2533602  |             |                |
| DM02592P4 | 0.08597457 | -1.0347719 | -1.204107  | -1.0150104 | RAB5C       | NM_001034743.2 |
| DM01095P1 | 0.08598344 | -1.09078   | -1.1736021 | -1.2059736 |             |                |
| DM11432P2 | 0.0860181  | -1.1199034 | 1.1209191  | 1.3758174  |             |                |
| DM02317P1 | 0.08605249 | -1.1192695 | -1.072743  | -1.239569  | DERE\GG249  | XM_001980945.1 |
| DM08433P1 | 0.08607718 | -1.3962698 | -1.2988932 | -1.0060357 |             |                |
| DM14819P1 | 0.08609445 | 1.2538471  | 1.0136371  | 2.3386552  |             |                |
| DM02621P1 | 0.08611821 | -1.1261716 | -1.173445  | -1.1731694 |             |                |
| DM00317P1 | 0.08615568 | 1.0155946  | -1.1551051 | -1.1709462 | DANA\GF214  | XM_001964126.1 |
| DM11515P1 | 0.08621096 | 1.1659873  | 1.4728965  | 1.1267686  |             |                |
| DM04085P3 | 0.08621746 | 1.2682931  | 1.3960544  | 1.2861053  |             |                |
| DM05698P1 | 0.08624247 | 1.1482952  | -1.1988049 | -1.2106881 |             |                |
| DM01074P1 | 0.08624981 | -1.0223734 | -1.1287739 | -1.0742487 | TXNRD1      | NM_001122673.1 |
| DM03566P1 | 0.08625053 | 1.1430389  | -1.0160998 | 1.3428159  |             |                |
| DM08696P1 | 0.08627927 | -2.0032861 | -2.0008225 | -1.2951156 |             |                |
| DM12022P1 | 0.0863355  | 1.288187   | 1.4603513  | 1.0980511  |             |                |
| DM12283P2 | 0.08638585 | 1.2715286  | 1.0526816  | -1.1086725 |             |                |
| DM12704P1 | 0.08644109 | 1.1761986  | -1.2575259 | 1.850595   | COL-43      | NM_072673.5    |
| DM01091P3 | 0.08660621 | -1.173141  | -1.1758927 | -1.1857731 |             |                |
| DM14251P3 | 0.0867677  | 1.0341458  | -1.0219252 | -1.1541917 |             |                |
| DM12791P1 | 0.08680043 | -1.4468377 | -1.6756802 | -1.0763701 |             |                |

|           |            |            |            |            |                           |
|-----------|------------|------------|------------|------------|---------------------------|
| DM02130P4 | 0.08687657 | -1.1666552 | 1.1487879  | -1.0386199 | DMOJ\GI237\XM_001998158.1 |
| DM05591P1 | 0.08688115 | -1.1800154 | 1.1265912  | -1.0099101 |                           |
| DM02456P2 | 0.08697084 | -1.0213882 | -1.2770681 | -1.2524534 | DSIM\GD219\XM_002079627.1 |
| DM00168P2 | 0.08697727 | -1.1478151 | -1.1723443 | -1.1491269 | ARD1A NM_001135839.1      |
| DM07255P3 | 0.08702609 | 1.0247008  | -1.2055928 | 1.0237737  |                           |
| DM08378P2 | 0.0871057  | 1.0996817  | 1.1093352  | 1.2696601  |                           |
| DM01119P1 | 0.08716954 | -1.2303628 | -1.076015  | -1.0128393 | LOC583647 XM_783549.2     |
| DM03479P2 | 0.08718099 | -1.0350761 | -1.1218209 | 1.4522538  |                           |
| DM11907P2 | 0.08719562 | 1.2442812  | 1.1226029  | 1.2893094  |                           |
| DM12664P3 | 0.08725442 | 1.0715523  | 1.0352463  | -1.102376  |                           |
| DM07142P3 | 0.0873192  | 1.0985522  | -1.1446599 | -1.2264848 |                           |
| DM02328P2 | 0.08733212 | -1.1993123 | -1.4512278 | -1.1822443 | LOC585200 XM_785035.2     |
| DM09626P3 | 0.08734942 | -1.1950911 | -1.2861236 | -1.5090162 |                           |
| DM11056P1 | 0.08749455 | 1.2008251  | 1.4916208  | 1.2040484  |                           |
| DM03242P2 | 0.08753072 | 1.1161973  | -1.144083  | -1.1163125 | GK2 NM_001097398.1        |
| DM12269P3 | 0.08755419 | 1.3189856  | 1.226388   | 1.1431797  |                           |
| DM11084P2 | 0.08759618 | -1.1414492 | -1.063722  | 1.0854809  | LOC664076 XM_970093.1     |
| DM05344P4 | 0.08762878 | -1.4702903 | 1.1697475  | -10.653737 |                           |
| DM01309P2 | 0.08764923 | -1.4363314 | -1.3006846 | -1.2966504 | LOC1002125\XM_002162205.1 |
| DM14830P2 | 0.08769965 | -1.1791272 | -1.2186172 | 1.0859618  |                           |
| DM09962P1 | 0.0877138  | -1.2112781 | -1.0721703 | 1.038988   |                           |
| DM09188P2 | 0.08774131 | -1.193689  | -1.0932741 | 1.184562   |                           |
| DM15095P1 | 0.08778857 | -1.0515041 | -1.3021221 | 1.2563541  |                           |
| DM01972P4 | 0.08785994 | -1.0406188 | -1.2074726 | -1.3687508 | DPSE\GA163\XM_001356481.2 |
| DM07446P4 | 0.08792689 | -1.2341096 | -1.3092996 | -1.1158911 |                           |
| DM01062P1 | 0.08794181 | 1.0696036  | 1.0587038  | -1.101055  | LOC551846 XM_624231.2     |
| DM07554P1 | 0.08796813 | 1.1128215  | 1.050652   | 1.2695781  |                           |
| DM01623P1 | 0.08803815 | 1.2574403  | 1.267054   | 1.279273   | LOC656087 XM_962638.2     |
| DM03079P3 | 0.08810834 | 1.1004     | -1.2391722 | -1.1245332 | SVOP XM_001861477.1       |
| DM00080P3 | 0.08814818 | -1.1781111 | -1.0880157 | -1.1757346 | LOC692971 NM_001046810.1  |
| DM03200P1 | 0.08819052 | 1.128332   | -1.0473195 | 1.0120641  | LOC733134 NM_001047081.1  |
| DM00826P3 | 0.08821503 | 1.0576952  | -1.0210272 | -1.0867994 | SPTLC2 XM_001491996.2     |
| DM05918P1 | 0.08821956 | -1.0327965 | -1.3534333 | -1.2638923 |                           |
| DM08281P2 | 0.08822041 | -1.1399026 | 1.0955998  | 1.3153093  |                           |
| DM07961P1 | 0.08823554 | 1.8505647  | 1.0699592  | -1.0228195 |                           |
| DM07986P1 | 0.08827072 | -1.0461761 | 1.1330534  | 1.388927   |                           |
| DM00411P1 | 0.08827689 | -1.0515456 | -1.1427543 | -1.3682572 | DWIL\GK163\XM_002067312.1 |
| DM03946P3 | 0.08831741 | 1.0505346  | 1.0690899  | -1.231973  |                           |
| DM03357P1 | 0.08834887 | 1.2104938  | 1.226334   | 1.503346   |                           |
| DM12773P2 | 0.08838284 | -1.0384765 | 1.0323262  | -1.3468392 |                           |
| DM11335P2 | 0.08843032 | -1.0919998 | 1.0815003  | -1.0312352 |                           |
| DM10348P2 | 0.08845478 | 1.0417837  | -1.1814382 | 1.1599766  |                           |
| DM13932P1 | 0.08855501 | -1.1188456 | -1.1088386 | 1.103831   |                           |
| DM07000P2 | 0.08865874 | 3.4935174  | 9.121397   | 2.6070373  |                           |
| DM04513P4 | 0.08872466 | 1.2273846  | -1.0102472 | -1.056137  |                           |
| DM08478P1 | 0.08872574 | -1.0903218 | 1.1736423  | -1.1434095 |                           |
| DM05618P3 | 0.0887584  | 1.2408652  | -1.7141138 | -1.0926634 |                           |
| DM04614P1 | 0.08893938 | 1.3388884  | 1.5504981  | 1.3365656  |                           |
| DM04857P2 | 0.08897559 | -1.0373222 | -1.198061  | 1.3752931  |                           |
| DM12446P3 | 0.0889947  | -1.0848776 | 1.0067234  | -1.2169131 |                           |

|           |            |            |            |            |            |                |
|-----------|------------|------------|------------|------------|------------|----------------|
| DM09932P4 | 0.08902465 | 1.0974417  | 1.3111373  | 1.0085859  |            |                |
| DM00356P2 | 0.08903309 | -1.0524629 | -1.0050796 | -1.2106727 | PPP2R1A    | NM_204074.1    |
| DM12542P2 | 0.0890485  | 1.4300966  | 1.1924366  | 1.3380039  |            |                |
| DM04702P3 | 0.08911483 | -1.2340492 | -1.2071983 | -1.3679527 |            |                |
| DM09008P3 | 0.08916052 | 1.2833873  | -1.2007339 | -1.5395646 |            |                |
| DM14024P2 | 0.08917373 | 1.0822878  | 1.0395595  | 1.6367453  |            |                |
| DM02836P4 | 0.08919241 | 1.1236962  | 1.1852558  | -1.2026922 | DSIM\GD243 | XM_002105713.1 |
| DM06617P3 | 0.08924557 | 1.1484138  | -1.0487207 | 1.7390226  |            |                |
| DM01203P3 | 0.08926049 | -1.0039645 | -1.3603513 | 1.0430954  | P4HA1      | XM_001867708.1 |
| DM06189P3 | 0.08926209 | -1.1740389 | -1.2039131 | -1.0249687 | TRIADDRAFT | XM_002110486.1 |
| DM03591P1 | 0.08926581 | 1.3694999  | -1.9957321 | 3.0926507  |            |                |
| DM04103P2 | 0.08927444 | -1.038447  | -1.3251305 | 1.0430014  | ISCW_ISCWC | XM_002416321.1 |
| DM05606P2 | 0.08932599 | -1.1836188 | -1.0682005 | -1.1621162 |            |                |
| DM13546P2 | 0.0893459  | 1.2877396  | 1.1789237  | 1.1982343  |            |                |
| DM11218P2 | 0.08938053 | 1.1558325  | 1.8816313  | 2.122606   |            |                |
| DM13557P2 | 0.08942209 | 1.0134884  | 1.2310507  | 1.0118151  |            |                |
| DM05492P2 | 0.08956484 | -1.1562136 | -1.3214453 | -1.7554648 |            |                |
| DM01054P3 | 0.08956702 | -1.091709  | 1.0212402  | -1.2189412 | LOC552458  | XM_624833.1    |
| DM09100P2 | 0.08959088 | 1.0353646  | 1.2021788  | 1.0560212  |            |                |
| DM11120P1 | 0.08966707 | 1.2144033  | 1.2525041  | 1.0452737  |            |                |
| DM05869P2 | 0.08968762 | 1.1763102  | 1.2669748  | 1.301075   | LOC552800  | XM_625175.2    |
| DM01668P1 | 0.08968929 | -1.0370162 | 1.0789541  | 1.3290012  | LOC1001205 | XM_001604106.1 |
| DM05345P2 | 0.08974166 | 1.0922991  | -1.3235607 | 1.3178178  |            |                |
| DM03325P2 | 0.08978836 | 1.0995487  | 1.2374625  | -1.0080901 | LOC732920  | NM_001046920.1 |
| DM03884P1 | 0.08981933 | -1.0435022 | -1.0996677 | -1.2075741 | DWIL\GK163 | XM_002067218.1 |
| DM09063P3 | 0.08992083 | -1.05309   | 1.0980613  | -1.2273521 |            |                |
| DM04714P1 | 0.0899721  | 1.2597132  | -1.1536531 | -1.9164962 |            |                |
| DM07616P3 | 0.08997222 | 1.271612   | -1.1686465 | 1.892037   |            |                |
| DM07949P1 | 0.09001758 | -1.0315517 | -1.3022203 | -1.0777748 |            |                |
| DM13113P1 | 0.09004304 | 1.0122184  | 1.0279024  | -1.1615117 |            |                |
| DM05812P2 | 0.0900965  | 1.6324024  | 1.3635223  | -1.4666789 |            |                |
| DM06755P1 | 0.09010969 | -1.0127769 | 1.0851551  | -1.2781873 |            |                |
| DM04422P2 | 0.09017247 | 1.0261668  | 1.0967041  | -1.1599098 |            |                |
| DM10184P1 | 0.09028549 | 1.0864056  | 1.1603385  | 1.1505592  |            |                |
| DM00485P1 | 0.09029149 | 1.0001647  | 1.0651119  | 1.2828852  | LIAS       | XM_536255.2    |
| DM03848P3 | 0.09038719 | 1.0548704  | 1.0628893  | -1.2062726 |            |                |
| DM03624P2 | 0.09042654 | -1.0489331 | -1.4008416 | 1.4626564  |            |                |
| DM04609P3 | 0.09050228 | -1.0397956 | 1.0352584  | -1.186215  |            |                |
| DM06561P1 | 0.0905404  | 1.9795183  | -1.4603258 | 2.6585248  | NEMVEDRAFT | XM_001624987.1 |
| DM04182P3 | 0.09068641 | 1.0575302  | 1.0061637  | -1.1804209 |            |                |
| DM13367P4 | 0.09068873 | -1.1085811 | 1.2954165  | -1.0896344 |            |                |
| DM05260P3 | 0.09088153 | -1.1221119 | -1.1314178 | -1.3332344 |            |                |
| DM14524P3 | 0.0909051  | 1.7915417  | 1.0356833  | 1.3109634  |            |                |
| DM07839P4 | 0.09095898 | -1.1840549 | -1.0950611 | -1.0013405 |            |                |
| DM03511P3 | 0.09096171 | 5.7857046  | 11.622188  | 2.3068032  |            |                |
| DM11325P2 | 0.09097519 | 1.1647873  | 1.6386098  | 1.835077   |            |                |
| DM07591P1 | 0.09099912 | 1.6280745  | 5.1784005  | -1.2883793 |            |                |
| DM09667P3 | 0.09102114 | 1.1616421  | 1.6478835  | 1.3616722  |            |                |
| DM05245P2 | 0.09102277 | -1.1988189 | -1.0696571 | -1.2678317 |            |                |
| DM12921P3 | 0.09105206 | 1.0033224  | 1.1124225  | 1.2048466  |            |                |

|           |            |            |            |            |             |                |
|-----------|------------|------------|------------|------------|-------------|----------------|
| DM05076P1 | 0.09115086 | 1.0275433  | -1.1188574 | -1.1967559 |             |                |
| DM02936P3 | 0.09115301 | -1.0593381 | 1.109323   | 1.3761947  | ARR         | XM_001663682.1 |
| DM11360P3 | 0.09116796 | 1.0617132  | -1.2579685 | -1.0040654 | AGAP_AGAP0  | XM_313700.4    |
| DM02538P1 | 0.09120771 | -1.1439227 | -1.3492426 | -1.0844723 | SPTB        | XM_001846806.1 |
| DM10051P1 | 0.09122186 | -1.181136  | -1.1893612 | -1.3225884 |             |                |
| DM14252P1 | 0.09122209 | 1.0437025  | 1.2105293  | 1.2351543  |             |                |
| DM09911P3 | 0.09125418 | 1.1811255  | -1.4174781 | 1.4637958  |             |                |
| DM08613P1 | 0.09128283 | 1.1532985  | 1.1958151  | 1.2791466  |             |                |
| DM09481P1 | 0.09129319 | -1.101126  | 1.0290903  | -1.339775  |             |                |
| DM08868P3 | 0.0913066  | -1.0746444 | -2.2855165 | -1.1245745 |             |                |
| DM10940P1 | 0.09131441 | -1.3314276 | -1.2737868 | 1.0339943  |             |                |
| DM05042P2 | 0.09134027 | 1.5977236  | 1.4273157  | 2.3357618  |             |                |
| DM06222P4 | 0.09139694 | 1.0109028  | -1.0980551 | -1.2525357 |             |                |
| DM00100P3 | 0.09140032 | -1.1117835 | -1.010566  | 1.2252887  | DVIR\GJ1651 | XM_002057108.1 |
| DM11262P2 | 0.09141845 | -1.0046246 | 1.0228366  | -1.3069718 |             |                |
| DM11541P1 | 0.09146167 | 1.0863516  | 1.1239588  | -1.0056602 |             |                |
| DM08234P1 | 0.09152389 | -1.1896528 | -1.2938851 | 1.0210308  |             |                |
| DM12047P3 | 0.09156703 | -1.2838119 | -1.1108432 | -1.1093153 |             |                |
| DM00435P2 | 0.09168588 | 1.0800205  | -1.1413634 | -1.0897    | PDH         | XM_001650646.1 |
| DM09146P4 | 0.09170885 | -1.1265249 | -1.0844489 | 1.1617358  |             |                |
| DM09168P3 | 0.09171867 | 1.1952307  | -1.4907582 | -1.1213151 |             |                |
| DM11117P1 | 0.09172317 | 1.0878237  | 1.067749   | 1.537958   |             |                |
| DM10329P3 | 0.09177799 | 1.0062809  | -1.2991085 | -1.4686191 |             |                |
| DM00089P3 | 0.09180766 | 1.3295431  | 1.5828192  | 1.3181976  | LOC1000140  | XM_001368331.1 |
| DM02479P2 | 0.09185296 | -1.0956285 | 1.0689741  | -1.0703053 | RQCD1       | XM_847959.1    |
| DM07904P3 | 0.09190179 | -1.3065687 | -1.1925244 | -1.2153853 |             |                |
| DM11314P3 | 0.09192136 | 1.1512735  | 1.1073549  | 1.542556   |             |                |
| DM13402P1 | 0.09196366 | 1.0246737  | 1.0974313  | -1.1760684 |             |                |
| DM10553P1 | 0.0919989  | 1.203112   | 1.2227585  | 1.1381304  |             |                |
| DM10137P2 | 0.09201314 | 1.1097542  | 1.2504294  | -1.1305028 |             |                |
| DM12581P1 | 0.09203578 | 1.3477436  | 1.5503143  | 1.1756642  |             |                |
| DM11378P4 | 0.09215864 | 1.3063897  | 1.5927857  | 1.4669672  |             |                |
| DM13912P1 | 0.09218195 | 1.8519316  | 2.3728504  | 1.5342532  |             |                |
| DM10479P4 | 0.09219528 | 1.1125665  | 1.7534175  | 1.7084519  |             |                |
| DM02302P1 | 0.0922008  | -1.1992027 | -1.1281707 | 1.1168487  | LOC581514   | XM_001191975.1 |
| DM00599P3 | 0.09224045 | 1.1527262  | 1.3298286  | 1.214586   | LOC1000566  | XM_001490332.2 |
| DM00469P1 | 0.09224362 | -2.7250354 | -3.0049381 | -1.6583213 |             |                |
| DM03595P3 | 0.0922703  | 1.3928478  | 1.4585537  | 1.1984832  |             |                |
| DM14953P1 | 0.09227847 | -1.1064382 | -1.0398728 | 1.2448525  |             |                |
| DM01802P4 | 0.09229263 | -1.1477612 | 1.0066855  | -1.1865851 | LOC1001696  | XM_001948468.1 |
| DM02107P3 | 0.09242266 | -1.07263   | -1.0223347 | -1.248151  | DLAT        | XM_856954.1    |
| DM00801P2 | 0.09245027 | -1.0316716 | 1.0698622  | -1.2068022 |             |                |
| DM09209P4 | 0.09248276 | 1.034498   | 1.2112008  | 1.0407913  |             |                |
| DM13967P3 | 0.09253854 | -1.2964019 | -1.2368882 | -1.1433184 |             |                |
| DM00376P1 | 0.09262876 | 1.0328791  | -1.1940387 | -1.1765327 | DVIR\GJ2223 | XM_002050551.1 |
| DM10163P3 | 0.09266526 | -1.0313767 | 1.104055   | 1.2730584  |             |                |
| DM04205P1 | 0.09266679 | -1.1143014 | -1.0243474 | -1.1627775 |             |                |
| DM08885P1 | 0.09268159 | -1.1973495 | -1.0972571 | 1.2002288  |             |                |
| DM09057P2 | 0.09270584 | -1.055637  | 1.0928574  | -1.1351757 | DYAK\GE103  | XM_002098441.1 |
| DM06213P2 | 0.09279383 | 1.098272   | -1.242743  | 1.2582922  | SPH19       | XM_392038.3    |

|           |            |            |            |            |            |                |
|-----------|------------|------------|------------|------------|------------|----------------|
| DM00491P2 | 0.09279761 | -1.0959045 | 1.0114074  | -1.1520988 | DSEC\GM190 | XM_002040234.1 |
| DM14839P2 | 0.09279902 | -1.004898  | -1.5376874 | -1.3222367 |            |                |
| DM10449P2 | 0.09282885 | 1.2326103  | 1.221473   | 1.0296364  |            |                |
| DM00602P1 | 0.09285034 | 1.1240709  | -1.0046055 | 1.2172601  | MXD1       | NM_001039310.1 |
| DM09199P1 | 0.0928868  | -1.0672548 | -1.018227  | -1.3150873 |            |                |
| DM09765P1 | 0.0929079  | -1.0165666 | 1.060883   | -1.3343661 |            |                |
| DM05059P3 | 0.09291605 | 1.016643   | -1.0343745 | 1.1747811  |            |                |
| DM08600P2 | 0.09293012 | 1.0014776  | 1.0603548  | 1.3588226  |            |                |
| DM13438P1 | 0.09295116 | -1.0667825 | 1.1697415  | 1.1243112  |            |                |
| DM07985P2 | 0.09298966 | -1.1455603 | -1.054941  | -1.0957167 |            |                |
| DM10634P2 | 0.09299894 | 1.5536957  | -3.0272777 | 2.4410641  | CG14191    | NM_133118.2    |
| DM11107P2 | 0.09299918 | 1.3385941  | 2.0349479  | 1.6205916  |            |                |
| DM07830P3 | 0.09300522 | -1.0088295 | 1.0281577  | 1.2114749  |            |                |
| DM06587P3 | 0.09300557 | 1.5164578  | 1.3746036  | 1.3471868  |            |                |
| DM13814P1 | 0.09305349 | -1.2855426 | 1.0266794  | 1.2922748  |            |                |
| DM08621P1 | 0.09308208 | -1.0955684 | -1.0224595 | 1.1330762  |            |                |
| DM07853P1 | 0.09310789 | 1.0396856  | 1.2430824  | 1.1166743  |            |                |
| DM06555P1 | 0.09312844 | 1.0114467  | -1.4251317 | 1.6171758  |            |                |
| DM06538P3 | 0.09321185 | 1.2313693  | 1.2586054  | 1.1326238  |            |                |
| DM08934P1 | 0.09324426 | 1.0316203  | 1.2117908  | 1.3734697  |            |                |
| DM00570P1 | 0.09324615 | -1.3232205 | -1.1616933 | 1.3679234  | LOC551968  | XM_624350.2    |
| DM11600P3 | 0.09328067 | -1.0763397 | -1.1290106 | -1.247623  | REEP5      | NM_001096221.1 |
| DM10502P2 | 0.09342746 | 1.0068157  | -1.0556751 | 1.5090128  |            |                |
| DM00204P4 | 0.09343304 | -1.0065117 | -1.021314  | -1.2141867 | LOC588451  | XR_026315.1    |
| DM10626P2 | 0.09351358 | 1.0324514  | 1.125186   | -1.0900097 |            |                |
| DM08524P1 | 0.09353467 | 1.0682502  | -1.1514263 | -1.1941634 |            |                |
| DM02723P2 | 0.09354002 | -1.0471427 | -1.0499027 | -1.2558244 | DANA\GF182 | XM_001954339.1 |
| DM08995P4 | 0.09362105 | 1.2024012  | -2.0171423 | 1.1960881  |            |                |
| DM02551P1 | 0.09363788 | -1.0794151 | -1.2666006 | -1.17853   | ECH1       | XM_001167849.1 |
| DM11348P1 | 0.09368328 | -1.0889584 | 1.0935395  | -1.0576363 |            |                |
| DM00354P3 | 0.09371214 | -1.0103328 | -1.0914022 | 1.2162964  | LOC725453  | XM_001120307.1 |
| DM04645P1 | 0.09372202 | -1.0414296 | -1.1867769 | -1.2020296 |            |                |
| DM08324P3 | 0.09373155 | 1.1836023  | 1.1400481  | 1.215096   |            |                |
| DM10995P3 | 0.09375531 | 1.0291178  | 1.2191726  | 1.0358683  |            |                |
| DM12202P4 | 0.09393378 | 1.0685056  | 1.0459173  | -1.0867823 |            |                |
| DM14579P3 | 0.09405801 | -1.2875677 | 1.1334748  | -1.0221277 |            |                |
| DM05482P1 | 0.0941969  | -1.0702192 | 1.0471745  | 1.6356775  | LOC448984  | NR_002170.3    |
| DM07955P1 | 0.09420384 | -1.1100168 | 1.2500732  | 1.2739729  |            |                |
| DM02554P1 | 0.09422703 | -1.0334405 | -1.0765234 | 1.2254004  |            |                |
| DM05234P3 | 0.09424593 | -1.0382314 | -1.0749724 | -1.3396074 |            |                |
| DM03043P3 | 0.0942467  | -1.0802702 | 1.2212161  | 1.0703572  | THERM_007  | XM_001026155.2 |
| DM13946P1 | 0.09437522 | -1.6835773 | -1.2056799 | -1.1484967 |            |                |
| DM12605P3 | 0.09438086 | -1.0423919 | -1.1381756 | 1.0547156  |            |                |
| DM04718P2 | 0.09440702 | -1.1666018 | -1.1077245 | -1.3212495 |            |                |
| DM12717P1 | 0.094416   | 1.08457    | -1.1172274 | -1.2136393 |            |                |
| DM12381P3 | 0.09449604 | 1.831083   | 1.7005706  | 2.572051   |            |                |
| DM03936P1 | 0.09451276 | 2.464596   | 2.923778   | 1.4635088  |            |                |
| DM11033P2 | 0.0945678  | 1.538408   | -1.0560645 | 1.2020813  |            |                |
| DM10850P4 | 0.09458765 | 1.1205633  | -1.5382228 | 2.1236608  |            |                |
| DM03092P2 | 0.09460481 | 1.0038373  | 1.1267233  | -1.1402917 | LOC588813  | XM_788477.1    |

|           |            |            |            |            |            |                |
|-----------|------------|------------|------------|------------|------------|----------------|
| DM08620P1 | 0.09460504 | -1.1069895 | 1.0590377  | -1.0972153 |            |                |
| DM09753P2 | 0.09461039 | -1.0723546 | -1.0355988 | -1.2184037 |            |                |
| DM13277P1 | 0.0946219  | -1.0679327 | -1.507413  | 1.0314109  |            |                |
| DM15038P1 | 0.09465515 | -1.0060269 | 1.1688826  | 1.0436845  |            |                |
| DM09505P2 | 0.09472298 | 1.2818359  | -1.3920329 | 1.1687969  |            |                |
| DM13061P2 | 0.09484062 | -1.121859  | 1.1764361  | -1.0412854 |            |                |
| DM14305P1 | 0.09497877 | -1.2008879 | 1.0201511  | 1.2328098  |            |                |
| DM00744P3 | 0.09502482 | -1.2738869 | -1.0964918 | -1.4088461 | TOP2B      | NM_205082.1    |
| DM13853P1 | 0.09504481 | -1.1457317 | -1.0137516 | 1.331208   |            |                |
| DM12964P1 | 0.09510438 | -1.2405211 | -1.2481822 | 1.7268963  |            |                |
| DM13618P1 | 0.09516278 | 1.0004759  | 1.353599   | 1.138664   |            |                |
| DM07443P3 | 0.09522669 | 1.065276   | -1.0341785 | 1.3611743  |            |                |
| DM01306P1 | 0.09524008 | -1.0606431 | -1.132544  | -1.0641569 |            |                |
| DM02966P3 | 0.09528871 | -1.0945112 | -1.2164336 | -1.2216196 |            |                |
| DM13634P4 | 0.09535951 | -1.3557756 | -1.1504828 | -1.2172606 |            |                |
| DM11520P1 | 0.09541205 | 1.0116047  | -1.146665  | -1.0906047 |            |                |
| DM14363P2 | 0.09545531 | 1.0868735  | 1.0882449  | 1.2075175  |            |                |
| DM04296P1 | 0.09546704 | -1.0319242 | 1.2048407  | 1.1396347  |            |                |
| DM13066P3 | 0.09546849 | 1.0146527  | -1.2894669 | -1.1758846 | CHGG_08117 | XM_001225772.1 |
| DM00096P3 | 0.09548765 | -1.0259893 | -1.1763896 | -1.1232487 | LOC408944  | XM_392473.3    |
| DM01368P4 | 0.09549019 | 1.1941109  | 1.2999787  | 1.1040252  | MDY        | XM_624751.2    |
| DM10565P3 | 0.09554648 | -1.1905552 | -1.1245111 | -1.0095403 |            |                |
| DM08511P1 | 0.09559645 | -1.1642135 | -1.9005986 | -1.4138323 |            |                |
| DM11657P2 | 0.09565581 | -1.0113279 | 1.2275585  | -1.099766  |            |                |
| DM07665P2 | 0.09565878 | 1.0071108  | 1.2020355  | -1.1491146 |            |                |
| DM14505P1 | 0.09570183 | -1.2213191 | 1.0072329  | -1.115847  |            |                |
| DM02601P2 | 0.09570389 | -1.0951976 | -1.3731596 | -1.1637273 | LOC1001668 | XM_001943378.1 |
| DM07091P3 | 0.09571654 | 1.143827   | 1.219851   | -1.2870966 |            |                |
| DM04749P1 | 0.09574847 | 1.6409881  | 1.7225542  | 1.1654149  |            |                |
| DM11995P2 | 0.09581046 | 1.2095169  | 1.0823029  | -1.097168  |            |                |
| DM00796P1 | 0.09583538 | 1.4666312  | 1.7716069  | 1.3895673  | POPTRDRAFT | XM_002317090.1 |
| DM05814P3 | 0.09589463 | -1.2270918 | -1.2518828 | 1.0468249  | BRAFLDRAFT | XM_002596443.1 |
| DM04679P1 | 0.095909   | 1.1896111  | 1.2548999  | 1.0859435  |            |                |
| DM02069P3 | 0.09592247 | -1.1504871 | -1.7399986 | 1.106778   |            |                |
| DM08253P3 | 0.0959445  | -1.1768517 | 1.1300812  | 1.2954364  |            |                |
| DM05939P3 | 0.09596168 | -1.0188814 | 1.080233   | 1.0677019  |            |                |
| DM04827P2 | 0.09601048 | 1.0007695  | -1.1508548 | -1.2083097 |            |                |
| DM09972P1 | 0.09604212 | 1.4693877  | 1.6070545  | 1.4974666  |            |                |
| DM10678P3 | 0.09604431 | 1.2291545  | 1.3479241  | 1.4176009  |            |                |
| DM11785P2 | 0.09606174 | 1.2744968  | 1.39064    | 1.5266914  |            |                |
| DM02420P3 | 0.09608579 | -1.1997982 | -1.081975  | -1.1177266 | AGAP_AGAP0 | XM_001688063.1 |
| DM03842P3 | 0.09634078 | 1.5953455  | -1.1936334 | 1.257516   |            |                |
| DM11361P1 | 0.09640052 | -1.2598791 | -1.1973221 | -1.2523597 |            |                |
| DM07504P1 | 0.09642673 | -1.1759518 | 1.0082818  | -1.2111111 |            |                |
| DM04128P2 | 0.09648426 | -1.0567172 | -1.046317  | 1.0807104  | RAB1B      | XM_860883.1    |
| DM04447P3 | 0.09651676 | -1.1638108 | 1.4704181  | -1.0715413 | ZUFSP      | NM_001093121.1 |
| DM02825P1 | 0.09657086 | -1.0352342 | -1.15633   | -1.08154   |            |                |
| DM14139P1 | 0.09659185 | -1.0025691 | 1.2080647  | -1.0560665 |            |                |
| DM04731P3 | 0.09659497 | 1.0160552  | -1.0841421 | -1.1555036 |            |                |
| DM09645P1 | 0.09669423 | 1.0650474  | 1.358578   | 1.2250648  |            |                |



|           |            |            |            |            |             |                |
|-----------|------------|------------|------------|------------|-------------|----------------|
| DM12808P1 | 0.09683271 | 1.2575778  | 1.182808   | 1.1451161  |             |                |
| DM08328P3 | 0.09693658 | -1.5766723 | -1.0580502 | -1.9058875 |             |                |
| DM04780P3 | 0.0969948  | 1.1853527  | 1.4244535  | 1.10806    |             |                |
| DM12570P3 | 0.09703074 | 1.0280604  | -1.0969179 | -1.3972404 |             |                |
| DM11232P2 | 0.09714595 | -1.010543  | 1.1439646  | 1.0544403  |             |                |
| DM06294P3 | 0.0971595  | -1.0255508 | -1.0951592 | -1.3737941 |             |                |
| DM04593P2 | 0.097269   | -1.2332889 | -1.1552233 | 1.1370169  |             |                |
| DM11689P2 | 0.09731215 | 1.161581   | -1.14371   | -1.1438415 |             |                |
| DM06895P2 | 0.0974116  | -1.1708316 | -1.0497806 | 1.0662075  |             |                |
| DM13536P4 | 0.09750073 | -1.3628377 | -1.3317069 | -1.7374475 |             |                |
| DM13654P2 | 0.09755528 | -1.447311  | -1.1703684 | 1.0780902  |             |                |
| DM02765P1 | 0.097557   | 1.1032913  | 1.2553653  | 1.1481     | DMOJ\GI2097 | XM_002003789.1 |
| DM00303P4 | 0.09760728 | 1.0606084  | 1.0579777  | -1.1568482 | LOC409766   | XM_393259.3    |
| DM07576P3 | 0.09762827 | -1.0202045 | -1.2550141 | 1.2654566  |             |                |
| DM07828P3 | 0.0976997  | 1.0138386  | 1.1523535  | 1.0484421  |             |                |
| DM14522P3 | 0.09773555 | -1.1570864 | 1.1713142  | 1.12731    |             |                |
| DM00465P1 | 0.097739   | -1.049169  | -1.174183  | -1.1621453 | AAEL_AAEL0C | XM_001651977.1 |
| DM04800P3 | 0.09778664 | 1.0653979  | -1.0272708 | -1.1493407 |             |                |
| DM10526P3 | 0.09783387 | 1.2263484  | -1.0389727 | 1.0709423  |             |                |
| DM11480P1 | 0.09791709 | -1.1928129 | 1.0236307  | -1.0469589 |             |                |
| DM13802P3 | 0.09805317 | -1.123539  | -1.0326781 | -1.3585156 |             |                |
| DM00617P2 | 0.09807894 | 1.160505   | -1.0557137 | -1.079079  | CG4288      | NM_169898.1    |
| DM05499P3 | 0.09812201 | 1.0467736  | 1.0046393  | 1.235859   | AGAP_AGAP0  | XM_001688807.1 |
| DM09699P1 | 0.09813722 | 1.0670842  | 1.3160847  | 1.3542858  |             |                |
| DM10774P3 | 0.09818409 | 1.1158326  | -1.0582483 | -1.3999277 |             |                |
| DM04034P1 | 0.09834462 | -1.200633  | -1.2310965 | -1.2142711 | DPER\GL226C | XM_002024176.1 |
| DM03147P2 | 0.09841196 | -1.1695589 | -1.8477603 | -1.4291047 |             |                |
| DM03411P3 | 0.09841723 | -1.7124876 | -1.1387736 | -4.1380486 | DVIR\GJ2443 | XM_002054372.1 |
| DM05649P1 | 0.09844723 | 1.2111808  | 1.2105398  | -1.0039381 |             |                |
| DM12124P2 | 0.09846917 | 1.2257335  | 1.0634729  | -1.0127281 |             |                |
| DM09409P3 | 0.09855264 | -1.0088142 | -1.0008832 | -1.2095637 |             |                |
| DM06731P2 | 0.0987266  | -1.015983  | -1.0255024 | -1.0897909 |             |                |
| DM10244P1 | 0.09875146 | -1.0691254 | 1.1017755  | -1.2947052 |             |                |
| DM13461P1 | 0.0987893  | -1.0318522 | -2.1091976 | 1.1911427  |             |                |
| DM12045P3 | 0.09890878 | 1.029431   | 1.1097827  | -1.324541  |             |                |
| DM01412P2 | 0.09896641 | -1.2567008 | -1.130464  | 1.1472096  | TUBA1       | XM_001849047.1 |
| DM10185P2 | 0.09901036 | 1.2803212  | 1.9911398  | -1.1870933 |             |                |
| DM03719P1 | 0.09902886 | 1.0116466  | 1.0203142  | 1.2621021  |             |                |
| DM11951P1 | 0.09903503 | 1.2993718  | 1.5303838  | 1.2340751  |             |                |
| DM10544P2 | 0.09912133 | -1.1761972 | 1.027473   | -1.1859927 |             |                |
| DM02089P2 | 0.09914688 | -1.0995398 | 1.1809759  | -1.2381444 | DBIB        | NM_001097111.1 |
| DM03500P1 | 0.09915368 | -1.0770013 | -1.0900446 | 1.1107767  | RPL19       | NM_001043756.4 |
| DM04642P1 | 0.09916396 | -1.0718346 | -1.0147297 | -1.2145183 |             |                |
| DM10661P3 | 0.09917095 | -1.2063282 | -1.1628948 | 1.0093397  |             |                |
| DM02990P1 | 0.09923501 | 1.182917   | -1.7892026 | 1.0029294  | AGAP_AGAP0  | XM_319746.4    |
| DM02219P4 | 0.09924793 | -1.2019154 | -1.0510777 | -1.0041873 | AAEL_AAEL01 | XM_001661395.1 |
| DM00564P2 | 0.09930478 | -1.1676084 | -1.1514322 | -1.2466921 | COPS3       | NM_199685.1    |
| DM06142P2 | 0.09938315 | 1.354266   | -1.108295  | 1.3437325  |             |                |
| DM00499P1 | 0.0994947  | 1.0401988  | 1.0618248  | -1.0783278 | CTSL        | NM_001170617.1 |
| DM12297P3 | 0.09955969 | 1.3234836  | 1.2612826  | 1.0539804  |             |                |

|           |            |            |            |            |                             |
|-----------|------------|------------|------------|------------|-----------------------------|
| DM00197P3 | 0.09963778 | -1.146265  | 1.0065721  | -1.153871  | DSEC\GM133 XM_002042233.1   |
| DM10535P2 | 0.0996379  | -1.3629737 | -1.2086957 | -1.042994  |                             |
| DM14951P1 | 0.0996709  | -1.0337386 | 1.0518571  | -1.1745373 |                             |
| DM02282P1 | 0.09994189 | -1.239584  | -1.1047089 | -1.1065738 | DANA\GF153 XM_001962130.1   |
| DM09041P1 | 0.09997659 | -1.0526668 | -1.0480306 | -1.1602619 |                             |
| DM12294P3 | 0.09999562 | 1.6234994  | 2.031166   | -1.2358738 |                             |
| DM03310P3 | 0.09999869 | -1.1490173 | -1.1149734 | -1.1647769 |                             |
| DM08321P1 | 0.10000246 | -1.1106    | -1.2005569 | 1.2875727  |                             |
| DM03008P1 | 0.10002469 | 1.2055931  | 1.1449287  | 1.4052255  | DMOJ\GI100 XM_002000066.1   |
| DM14862P3 | 0.10003091 | -1.0453018 | 1.0485063  | 1.1732632  |                             |
| DM12001P2 | 0.10003675 | -1.0352938 | 1.1908934  | 1.1522428  |                             |
| DM12064P2 | 0.10005572 | 1.0410374  | 1.0299952  | -1.2154926 |                             |
| DM11088P2 | 0.10008323 | -1.0209954 | 1.0575272  | -1.1891356 |                             |
| DM06414P3 | 0.10008468 | -1.3968618 | -1.0576406 | 1.0310036  | DPSE\GA105 XM_001358976.2   |
| DM14825P2 | 0.10009109 | -1.2094889 | -1.1031377 | -1.3505374 |                             |
| DM07261P2 | 0.10013206 | -1.3481747 | -1.0834131 | 1.1020138  |                             |
| DM04878P3 | 0.10017776 | -1.5908885 | -1.2392901 | 1.4243547  |                             |
| DM01564P1 | 0.10026733 | -1.1097112 | 1.1118609  | 1.1963265  | RPL11 NM_001158230.1        |
| DM02239P3 | 0.10030899 | 1.1768061  | 1.2676476  | -1.0514743 |                             |
| DM09535P2 | 0.10035407 | 1.0300772  | 1.1000681  | -1.215124  |                             |
| DM12027P2 | 0.1004575  | -1.053357  | -1.533976  | -2.5089092 |                             |
| DM04442P2 | 0.10046279 | -1.1446083 | -1.0098366 | 1.2900832  |                             |
| DM11868P1 | 0.1004686  | 1.0092937  | -1.3441359 | -1.1109246 |                             |
| DM01034P1 | 0.10047458 | 1.0616642  | -1.0473443 | 1.2047591  | PMPCA NM_001170902.1        |
| DM08205P2 | 0.10047925 | -1.2186843 | -1.19582   | -1.2720681 |                             |
| DM10935P2 | 0.10048436 | 1.117489   | 1.0899903  | 1.273583   |                             |
| DM00344P4 | 0.10051259 | -1.0377496 | -1.1012998 | 1.0731124  | DERE\GG158 XM_001972993.1   |
| DM08703P1 | 0.10052887 | 1.2998683  | 1.1223954  | -1.000822  |                             |
| DM10143P1 | 0.10069589 | -1.4596937 | -1.2290024 | -1.0996916 |                             |
| DM02321P3 | 0.10075633 | 1.0628948  | 1.0926195  | -1.089318  | CDC42 NM_001008026.1        |
| DM12603P3 | 0.10076138 | -1.0402504 | -1.0737234 | -1.207625  |                             |
| DM09748P2 | 0.1008371  | 1.1443833  | 1.2321956  | -1.0336701 |                             |
| DM02686P1 | 0.10085012 | 1.1822054  | 1.3308866  | 1.1084516  | ISCW_ISCWC XM_002411596.1   |
| DM08642P1 | 0.10090071 | 1.1125382  | -1.0904787 | 1.8324558  |                             |
| DM04628P2 | 0.10092019 | 1.2485147  | -1.0212808 | 1.0587902  |                             |
| DM07017P3 | 0.10092658 | 1.0182198  | 1.1136402  | 1.2337363  |                             |
| DM09461P2 | 0.10095075 | 1.01832    | 1.1062243  | 1.1907507  |                             |
| DM03051P3 | 0.10097024 | 1.0563523  | -1.0938661 | -1.0339762 |                             |
| DM11298P1 | 0.10103101 | 1.0644658  | 1.1269602  | -1.1644753 |                             |
| DM09687P4 | 0.10112488 | -1.0031153 | -1.1757745 | -1.2161088 |                             |
| DM12731P1 | 0.1011939  | -1.1757001 | -1.2600396 | 1.0521423  |                             |
| DM00232P3 | 0.10120842 | 1.0503917  | -1.0787472 | -1.1873704 | TRIADDRAFT_XM_002107946.1   |
| DM13080P4 | 0.10125864 | -1.173947  | 1.0865725  | 1.1370406  |                             |
| DM09231P2 | 0.10127051 | 1.0862644  | 1.0246036  | 1.30755    |                             |
| DM11865P1 | 0.10127723 | 1.1855799  | 1.3154123  | 1.3939645  |                             |
| DM07803P3 | 0.10133289 | 1.0855876  | -2.40151   | 1.1181926  |                             |
| DM04917P1 | 0.10137846 | -1.1204451 | -1.1908951 | 1.0593506  |                             |
| DM02057P3 | 0.10139301 | -1.2533149 | -2.0904434 | -1.3518935 | CPIPJ_CPIJOC XM_001849296.1 |
| DM03255P3 | 0.10140412 | 1.1558475  | 1.1290673  | 1.1945423  | VPS36 XM_395542.2           |
| DM10949P1 | 0.10159206 | 1.0049521  | 1.0253103  | -1.1461736 |                             |

|           |            |            |            |            |            |                |
|-----------|------------|------------|------------|------------|------------|----------------|
| DM13515P2 | 0.10162029 | -1.1588455 | -1.0446801 | -1.2279017 |            |                |
| DM04701P1 | 0.10174798 | 1.0810059  | -1.1127871 | -1.1423504 | LOC588493  | XM_788174.2    |
| DM07256P1 | 0.10179269 | -1.2967112 | -1.3343041 | -1.9176658 |            |                |
| DM11346P1 | 0.10181812 | 1.0073606  | 1.0258713  | 1.2212783  |            |                |
| DM00747P1 | 0.10183252 | 1.6220094  | 2.0162451  | -1.0609348 |            |                |
| DM04664P2 | 0.10184424 | 1.0418909  | 1.0125943  | 1.0493621  |            |                |
| DM14936P1 | 0.10186771 | -1.1812924 | 1.04354    | -1.1288662 | LOC1001667 | XM_001951541.1 |
| DM11597P1 | 0.10188218 | -1.0938157 | 1.1488447  | -1.095431  |            |                |
| DM07207P1 | 0.10190736 | 1.1133602  | 1.0972223  | -1.179616  |            |                |
| DM14269P2 | 0.10191336 | 1.402918   | -1.0215425 | 1.5716931  |            |                |
| DM02948P1 | 0.10193338 | 1.1352429  | 1.0387924  | -1.1421199 |            |                |
| DM10228P2 | 0.10198275 | 1.1204314  | -1.0631484 | -1.2424881 |            |                |
| DM11054P1 | 0.10198492 | 1.2533752  | -1.599622  | 2.3547826  |            |                |
| DM03094P1 | 0.10203891 | 1.1156869  | -1.7596155 | -1.0779185 | LOC1001187 | XM_001602559.1 |
| DM01839P1 | 0.1021786  | 1.7215037  | 1.5267603  | -1.0513507 |            |                |
| DM04895P3 | 0.10222296 | -1.1797172 | 1.0513666  | -1.2548422 |            |                |
| DM05331P2 | 0.10226534 | -1.0181491 | 1.1458207  | 1.0305011  | ENDOB      | XM_623585.2    |
| DM04323P3 | 0.1022844  | 1.1225828  | 1.1667101  | 1.2806817  | LOC1001976 | XM_002167247.1 |
| DM07171P3 | 0.10233501 | 1.3227415  | 2.1785395  | 1.0849302  |            |                |
| DM10372P1 | 0.10234384 | -1.0033672 | 1.2049953  | 1.1771786  |            |                |
| DM01175P1 | 0.10238121 | -1.0067481 | 1.067232   | 1.1472504  |            |                |
| DM05867P1 | 0.10240592 | -1.0371894 | -1.1703154 | -1.3344444 | GSPATT0001 | XM_001444630.1 |
| DM09540P3 | 0.10242308 | -1.051032  | 1.0362357  | -1.2168978 |            |                |
| DM00152P1 | 0.10249187 | 1.0957444  | -1.2624686 | -1.2458355 | TFIIB      | XM_002051119.1 |
| DM06387P2 | 0.10249853 | 1.287784   | 1.1682142  | 1.1027135  |            |                |
| DM00226P3 | 0.10254064 | -1.0210122 | 1.1337543  | -1.1930614 | HSPA8      | NM_006597.3    |
| DM05226P1 | 0.10257474 | 1.1492008  | -1.0199848 | 1.6490352  | DERE\GG120 | XM_001981390.1 |
| DM10293P1 | 0.10258448 | 1.3583089  | 1.0914451  | 1.0514903  |            |                |
| DM04768P3 | 0.10263905 | 1.6199473  | 1.6624806  | 1.3002124  |            |                |
| DM04020P1 | 0.10269358 | -1.0497713 | -1.1598802 | -1.2586576 |            |                |
| DM02355P1 | 0.10274262 | 1.5341022  | 1.228462   | 1.2154138  | BRAFLDRAFT | XM_002604945.1 |
| DM04613P2 | 0.10274923 | -1.044965  | -1.1650226 | -1.1817808 |            |                |
| DM04688P1 | 0.10278615 | -1.1392906 | -1.1266083 | 1.5390671  |            |                |
| DM07242P2 | 0.10278975 | -1.2839425 | -1.0736022 | -1.5296586 |            |                |
| DM06933P3 | 0.1028259  | 1.2158221  | 1.2369921  | 1.4077508  |            |                |
| DM02462P2 | 0.10298178 | -1.0063521 | -1.2775133 | -1.2734486 | DWIL\GK170 | XM_002075230.1 |
| DM13505P1 | 0.10298332 | -1.0395877 | 1.1948847  | 1.1228083  |            |                |
| DM09836P3 | 0.1030407  | 1.0809343  | -1.0580399 | -1.0694075 |            |                |
| DM06071P2 | 0.10313752 | 1.0633415  | 1.0186706  | 1.472181   |            |                |
| DM01883P2 | 0.10314023 | -1.1309487 | -1.0309027 | 1.1886088  | LOC660648  | XM_966861.1    |
| DM01521P3 | 0.10322829 | -1.0304002 | -1.2967298 | -1.3398999 |            |                |
| DM04574P4 | 0.10330803 | 1.6206304  | 2.3429892  | 1.039238   |            |                |
| DM13828P3 | 0.10340066 | -1.1870569 | -1.031059  | 1.0974282  |            |                |
| DM01847P3 | 0.10344023 | 1.0612309  | -1.2809598 | -1.2760507 | DWIL\GK100 | XM_002071538.1 |
| DM14925P2 | 0.10344784 | -1.2147994 | 1.044385   | 1.1506305  |            |                |
| DM05682P3 | 0.10353496 | 1.0955503  | 1.0018249  | -1.1539462 |            |                |
| DM14245P4 | 0.1035442  | -1.0410239 | 1.1291065  | 1.4698225  |            |                |
| DM01851P1 | 0.10362601 | -1.0818229 | -1.1638815 | -1.0125971 | LOC1000788 | XM_001509793.1 |
| DM10791P1 | 0.10366384 | -1.157859  | -1.0382435 | -1.2508447 |            |                |
| DM00146P1 | 0.10367574 | 1.2430525  | 1.2076862  | 1.1299462  | ING5       | NM_001141202.1 |

|            |            |            |            |            |             |                |
|------------|------------|------------|------------|------------|-------------|----------------|
| DM01217P1  | 0.1037225  | -1.0577192 | -1.1636865 | -1.2186452 |             |                |
| DM03023P3  | 0.10379142 | 1.512821   | 1.7527543  | 1.1358776  | DMOJ\GI1777 | XM_002003146.1 |
| DM07090P2  | 0.10385164 | -1.8079082 | -2.4764967 | -1.4400982 |             |                |
| DM07644P2  | 0.10385403 | 1.0673211  | -1.0203781 | -1.1613442 |             |                |
| DM03129P4  | 0.10385617 | 1.2116922  | 1.4371032  | -1.4255981 | SLC12A2     | NM_174782.2    |
| DM06605P3  | 0.10388383 | 1.5415379  | 1.9541647  | 1.9523875  |             |                |
| DM01584P1  | 0.10393462 | -1.0048764 | -1.0402423 | 1.0172454  | BRAFLDRAFT  | XM_002599072.1 |
| DM00558P3  | 0.10397753 | -1.090127  | 1.0239733  | -1.0010018 | MOE         | NM_206669.1    |
| DM06934P4  | 0.10399523 | 2.2111464  | 4.70829    | 1.6773773  |             |                |
| DM12108P3  | 0.10409693 | -1.1689289 | 1.3808254  | -1.8011701 |             |                |
| DM00166P2  | 0.10414327 | 1.0655544  | -1.213285  | -1.0712903 | LOC663340   | XM_969392.1    |
| DM111116P3 | 0.10416203 | -1.1972259 | 1.1463202  | -1.2487031 |             |                |
| DM07771P1  | 0.10417456 | -1.1362854 | -1.2763608 | -1.1841478 |             |                |
| DM06171P2  | 0.10418638 | 1.2077329  | 1.1625185  | -1.1244856 | AAEL_AAELOC | XM_001652772.1 |
| DM04538P2  | 0.10419339 | 1.2369671  | 1.0165383  | -1.4501177 |             |                |
| DM08842P1  | 0.10422035 | 1.1653416  | 1.4335958  | 1.2812018  |             |                |
| DM03673P1  | 0.10425361 | 1.3105754  | 1.3700566  | 1.0343428  |             |                |
| DM00925P1  | 0.10429578 | -1.0662054 | -1.0067605 | 1.068869   | LOC693092   | NM_001046845.1 |
| DM10751P3  | 0.10431696 | 1.5974954  | -1.1634356 | 2.1969655  |             |                |
| DM06324P2  | 0.10438861 | -1.089981  | -1.0603284 | 1.1573343  |             |                |
| DM02480P3  | 0.10444918 | -1.0376672 | 1.0083398  | -1.1125766 | DSEC\GM166  | XM_002041684.1 |
| DM06900P1  | 0.10447078 | 1.0930338  | 1.1386573  | -1.1311265 |             |                |
| DM01697P1  | 0.10451152 | -1.0266744 | -1.0017564 | -1.1710314 | LOC580462   | XM_001176979.1 |
| DM11305P3  | 0.10453235 | -1.0807003 | -1.1392096 | -1.2500441 |             |                |
| DM00069P1  | 0.10458999 | -1.0104054 | -1.4347074 | -1.2152137 | DESAT1      | NM_169467.1    |
| DM00881P2  | 0.10461091 | -1.1356742 | -1.0080098 | -1.1364349 | NIT2        | NM_001034126.1 |
| DM14952P1  | 0.10468474 | 1.2793393  | -1.274458  | 1.4974519  |             |                |
| DM02827P1  | 0.10470437 | -1.6071554 | -1.2617145 | -1.2861627 |             |                |
| DM11996P3  | 0.10477101 | -1.0442349 | 1.3224972  | 1.070456   |             |                |
| DM01360P2  | 0.10478282 | 1.1448563  | 1.2946851  | 1.2039144  |             |                |
| DM01720P1  | 0.10481238 | -1.0953515 | -1.1083269 | -1.024004  | LOC660824   | XM_967027.2    |
| DM07354P2  | 0.10490076 | 1.0136431  | 1.1059684  | -1.6619676 |             |                |
| DM04753P1  | 0.10499835 | 1.0816333  | -1.7170836 | -1.0482962 |             |                |
| DM02271P1  | 0.10502874 | 1.105853   | 1.0632273  | -1.0365485 | DMOJ\GI1242 | XM_002007339.1 |
| DM08445P3  | 0.10515155 | 1.0694698  | -1.0371405 | 1.3335804  |             |                |
| DM01401P3  | 0.10522766 | -1.1990513 | -1.0633922 | 1.1398542  | LOC408600   | XM_392142.3    |
| DM03857P3  | 0.10522983 | -1.180639  | -1.1628344 | -1.4089411 |             |                |
| DM03972P1  | 0.10528745 | -1.2056581 | 1.1164725  | -1.9666857 |             |                |
| DM09684P2  | 0.10529524 | -1.2655262 | 1.0045861  | 1.3315256  |             |                |
| DM03565P3  | 0.10534594 | 1.2931547  | 1.1479653  | 1.0639857  | DYAK\GE238  | XM_002098504.1 |
| DM07479P1  | 0.1053789  | -1.0652705 | 1.1831217  | 1.31893    |             |                |
| DM05494P3  | 0.10538127 | 1.5288491  | 1.5847924  | 1.3272377  |             |                |
| DM08308P3  | 0.10544086 | -1.2718278 | -1.3928975 | -1.2743765 |             |                |
| DM06057P2  | 0.10550238 | -1.6452299 | -1.5945452 | -2.0648644 |             |                |
| DM02326P2  | 0.10556452 | -1.0903671 | -1.0299877 | -1.189756  | LOC413822   | XM_397261.3    |
| DM04992P1  | 0.10563608 | 1.0155513  | 1.060229   | 1.1344529  |             |                |
| DM11101P1  | 0.10565618 | -1.1069735 | 1.045207   | -1.1749032 |             |                |
| DM12250P1  | 0.1056841  | -1.0647085 | 1.0606619  | 1.205286   |             |                |
| DM10424P1  | 0.10574364 | 1.0262568  | 1.1243411  | -1.0861026 |             |                |
| DM03432P3  | 0.10575829 | 1.2078736  | 1.5067792  | 1.3487971  |             |                |

|           |            |            |            |            |             |                |
|-----------|------------|------------|------------|------------|-------------|----------------|
| DM08435P3 | 0.10581372 | -1.1518329 | -1.1736646 | -1.2765018 |             |                |
| DM01736P1 | 0.10593254 | -1.0328851 | -1.0369858 | 1.092582   | DPSE\GA189  | XM_001357855.2 |
| DM12870P1 | 0.10597435 | -1.1093236 | 1.0530558  | -1.2104238 |             |                |
| DM08254P1 | 0.10609793 | -1.2178987 | 1.196087   | 1.0569439  |             |                |
| DM07099P3 | 0.1061483  | -2.3859782 | -2.4128687 | -1.176945  |             |                |
| DM06307P2 | 0.10614929 | -1.1661644 | 1.00392    | -1.2096462 | LWR         | XM_623680.2    |
| DM05309P3 | 0.10616168 | 1.0420973  | -1.0052532 | 1.1457353  | LOC590925   | XM_001176898.1 |
| DM15242P3 | 0.10621721 | 1.2187364  | 1.4095422  | 1.2255651  |             |                |
| DM10213P2 | 0.10623094 | -1.1178905 | 1.0381501  | -1.1332293 |             |                |
| DM07590P3 | 0.10627659 | -1.1946983 | -1.1378772 | 1.1911331  |             |                |
| DM02514P1 | 0.1064382  | 1.0219159  | 1.0536722  | -1.1030737 | BM1_40255   | XM_001899473.1 |
| DM08781P1 | 0.1064723  | 1.1366653  | 1.2648735  | 1.0552181  |             |                |
| DM12056P3 | 0.10651857 | 1.0604362  | 1.229098   | 1.0549963  |             |                |
| DM07926P1 | 0.106548   | 1.2435896  | 1.18316    | 1.0729767  |             |                |
| DM13633P1 | 0.10657889 | -1.346984  | -1.0337865 | 1.2480421  |             |                |
| DM12300P1 | 0.10660403 | -1.0949173 | 1.0231197  | 1.1818357  |             |                |
| DM07659P1 | 0.10661832 | 1.0916702  | 1.2602459  | 1.023228   |             |                |
| DM06348P3 | 0.10669888 | 1.0591497  | 1.0362816  | -1.1667148 |             |                |
| DM11492P1 | 0.1068925  | -1.1500959 | -1.006661  | -2.4615998 |             |                |
| DM15205P1 | 0.10692406 | 1.2549012  | -2.1091413 | -1.2454206 |             |                |
| DM08211P1 | 0.10695657 | 1.0021199  | 1.1879218  | 1.1210537  |             |                |
| DM01945P2 | 0.10695677 | 1.3637376  | 1.1789944  | 1.0603725  |             |                |
| DM08909P1 | 0.10704809 | -1.3779514 | -1.0152982 | -4.8002253 |             |                |
| DM08197P4 | 0.10711456 | -1.1136788 | -1.6533818 | 1.5666434  |             |                |
| DM06911P3 | 0.10714173 | 1.3489558  | 1.5606248  | 1.8216009  | THAPSDRAFT  | XM_002292473.1 |
| DM03208P2 | 0.10744191 | 1.0730165  | 1.0512906  | 1.1906537  | LOC1001668  | XM_001951723.1 |
| DM14857P3 | 0.10746536 | -1.0116144 | 1.2527218  | 1.0150867  | DPSE\GA197  | XM_001353784.2 |
| DM11220P2 | 0.10746729 | 1.0366452  | -1.0552062 | -1.1053534 |             |                |
| DM15266P2 | 0.10775933 | 1.235773   | 1.6592802  | 1.6981587  |             |                |
| DM10650P2 | 0.10780707 | 1.0314033  | -1.0254962 | -1.1525342 |             |                |
| DM01023P1 | 0.10781815 | 1.3690959  | -1.0457168 | -1.1413274 | LOC661201   | XM_967377.2    |
| DM10998P3 | 0.10782042 | 1.3248726  | -1.1245981 | 1.7908189  |             |                |
| DM08273P4 | 0.10790292 | -1.0900148 | 1.2730498  | 1.2132217  |             |                |
| DM05994P1 | 0.10794697 | 1.2005934  | 1.5561321  | 1.5461323  |             |                |
| DM02942P2 | 0.10796616 | -1.0452951 | -1.1060275 | -1.1997263 | LOC1001153  | XM_001600020.1 |
| DM06991P3 | 0.10802741 | 1.0822715  | -1.4496914 | 1.1722554  | LOC1000804  | XM_001512383.1 |
| DM07553P4 | 0.10813313 | 1.7218556  | 1.2377037  | 1.52474    |             |                |
| DM13771P2 | 0.10816085 | 1.0569235  | -1.6379372 | -1.1196059 |             |                |
| DM03690P2 | 0.10817886 | -1.033998  | 1.150325   | 1.7258531  | CHIT        | XM_001841628.1 |
| DM01609P3 | 0.1082029  | 1.1110827  | 1.1474617  | 1.3786732  | CAT         | XM_001848521.1 |
| DM14909P3 | 0.10824772 | -1.0375072 | -1.095164  | -1.335971  |             |                |
| DM09228P1 | 0.10828933 | 1.1720331  | 1.1675718  | 1.1849587  |             |                |
| DM10164P2 | 0.1083132  | -1.1698463 | 1.1431493  | 1.2295338  |             |                |
| DM08650P1 | 0.10832325 | -1.0641842 | -1.0927655 | -1.2702134 |             |                |
| DM03246P1 | 0.10835462 | -1.0593343 | -1.1055378 | -1.15385   | DVIR\GJ1375 | XM_002048026.1 |
| DM13705P3 | 0.10836783 | -1.3238302 | -1.3321706 | -1.3351898 |             |                |
| DM10288P4 | 0.10837475 | -1.048506  | 1.0465019  | 1.0843737  |             |                |
| DM09951P4 | 0.10838648 | 1.12424    | 1.2250793  | 1.0090123  |             |                |
| DM01227P3 | 0.10846128 | 1.1698518  | -1.0342407 | 1.47752    | DERE\GG172  | XM_001980591.1 |
| DM10589P1 | 0.10847732 | 2.2604709  | 3.303719   | 1.5897529  |             |                |

|           |            |            |            |            |             |                |
|-----------|------------|------------|------------|------------|-------------|----------------|
| DM02510P1 | 0.10848222 | -1.0782367 | -1.1146493 | 1.0160482  | CHRO.20441  | XM_662573.1    |
| DM05357P1 | 0.10849068 | 1.1705792  | 1.3762343  | -1.0954083 |             |                |
| DM00885P3 | 0.10851256 | 1.2022147  | 1.2388427  | 1.0587559  | MONBRDRAF   | XM_001749089.1 |
| DM13772P1 | 0.1085415  | -1.3123403 | -1.1192186 | 1.0699961  |             |                |
| DM09856P1 | 0.10856964 | -1.2049491 | 1.2089336  | 1.0351077  |             |                |
| DM03879P1 | 0.10863507 | -1.2655399 | -1.0112636 | -1.1456966 |             |                |
| DM06951P4 | 0.10865785 | 1.1248075  | 1.3940607  | 1.5251225  |             |                |
| DM01030P4 | 0.10869408 | 1.1282389  | -1.0677714 | 1.3153276  | LOC1001688  | XM_001945918.1 |
| DM12855P2 | 0.10869408 | 1.1520045  | -1.2404603 | -1.0826926 |             |                |
| DM01278P4 | 0.10871398 | -1.0006274 | -1.0746641 | -1.3556306 | DMOJ\GI195  | XM_002004435.1 |
| DM04124P3 | 0.1090766  | 1.1118797  | -1.6002941 | 1.8732208  | COL4A2      | XM_001894792.1 |
| DM04925P3 | 0.10910067 | -1.1296625 | -1.2926432 | 1.0028796  | LOC410918   | XM_394394.3    |
| DM09711P3 | 0.10912596 | 1.3543676  | 1.4774265  | 1.0450442  |             |                |
| DM03832P4 | 0.10912602 | -1.0230914 | -1.0799692 | -1.2402471 |             |                |
| DM06255P2 | 0.10928049 | -1.1510257 | -1.0814774 | -1.295983  |             |                |
| DM05783P1 | 0.10935891 | -1.2274834 | -1.5995915 | -1.848155  | DYAK\GE183  | XM_002087911.1 |
| DM01646P1 | 0.10937113 | -1.1128775 | -1.0572293 | -1.21633   | LOC413145   | XM_396596.3    |
| DM06192P1 | 0.10940594 | -1.0628734 | 1.0208863  | -1.0933045 |             |                |
| DM05163P1 | 0.10948957 | 1.4673895  | 1.4299481  | 1.447176   |             |                |
| DM03442P2 | 0.10957176 | -1.173817  | 1.0179534  | 1.1136452  | AAEL_AAEL01 | XM_001655005.1 |
| DM06527P1 | 0.10957257 | 1.757211   | 1.3756986  | -1.1238414 |             |                |
| DM11179P4 | 0.10962732 | 1.0920781  | -1.1629231 | -1.1905026 |             |                |
| DM12493P1 | 0.10965359 | -1.0915316 | -1.3705187 | 1.0279366  |             |                |
| DM04804P1 | 0.10969287 | -1.157001  | -1.158957  | -1.036384  |             |                |
| DM09412P3 | 0.10973547 | 1.0827514  | 1.0236412  | -1.2765089 |             |                |
| DM06868P2 | 0.10976136 | -1.0803955 | 1.0929848  | -1.322742  |             |                |
| DM01160P3 | 0.10981911 | 1.4756179  | 1.0123454  | 1.1083788  |             |                |
| DM01324P1 | 0.10986766 | -1.2141567 | -1.0453722 | -1.0884205 | CNOT3A      | NM_001005582.1 |
| DM01775P3 | 0.10995456 | 1.0983778  | -1.1728798 | -1.2824657 | LOC732966   | NM_001046964.1 |
| DM03798P4 | 0.11002502 | -1.2155021 | -1.0188122 | -1.4537675 | DMOJ\GI130  | XM_002007554.1 |
| DM02709P1 | 0.11002814 | -1.0106705 | -1.0939853 | 1.1212468  | F23B12.5    | NM_074178.5    |
| DM04111P2 | 0.11008587 | 1.0281323  | 1.1281044  | -1.1790386 |             |                |
| DM08812P1 | 0.11010849 | 1.0890118  | 1.0082283  | -1.1464683 |             |                |
| DM08327P1 | 0.11020282 | 1.0036637  | 1.1245557  | -1.18448   |             |                |
| DM07074P2 | 0.11020507 | 1.117586   | -1.0619266 | 1.41349    |             |                |
| DM03180P4 | 0.1104399  | 1.0886971  | -1.1841848 | -1.0971744 | DVIR\GJ2018 | XM_002050439.1 |
| DM13714P3 | 0.11049917 | 1.2895025  | 1.5593877  | 1.3395338  |             |                |
| DM14222P2 | 0.11050843 | -1.0045724 | 1.3135623  | 1.147661   |             |                |
| DM06245P3 | 0.11052676 | 1.0297245  | -1.402668  | 1.1818947  |             |                |
| DM11379P4 | 0.11054149 | 1.0773237  | -1.0304644 | -1.2453989 |             |                |
| DM02748P1 | 0.11055055 | -1.1185715 | -1.1293753 | 1.0481989  |             |                |
| DM08101P1 | 0.1106104  | -1.5170147 | -1.2683411 | -1.9020675 |             |                |
| DM03548P1 | 0.11061109 | -1.0057192 | -1.0368576 | -1.2199677 | DYAK\GE252  | XM_002096012.1 |
| DM05581P1 | 0.11064076 | -1.0931491 | 1.1271149  | 1.3351796  |             |                |
| DM13452P3 | 0.11064485 | -1.140368  | 1.0639461  | -1.0828083 |             |                |
| DM11786P1 | 0.1106471  | -1.2781261 | -1.4047827 | -1.560296  |             |                |
| DM12982P3 | 0.11066204 | -1.3195698 | 1.0605856  | 1.0475609  |             |                |
| DM03678P1 | 0.11070462 | -1.0481089 | 1.1711626  | -1.3271449 |             |                |
| DM13784P1 | 0.11072529 | -1.0508848 | -1.0841655 | 1.1398191  |             |                |
| DM00419P1 | 0.11079274 | 1.1493783  | 1.1105782  | -1.0011902 | ATG9        | XM_001960859.1 |

|           |            |            |            |            |             |                |
|-----------|------------|------------|------------|------------|-------------|----------------|
| DM14364P2 | 0.11087395 | -1.271233  | 1.0468913  | 1.1098471  |             |                |
| DM08275P3 | 0.1109626  | -1.1616862 | -1.2065884 | -1.0738543 |             |                |
| DM02786P1 | 0.11096472 | 1.0384564  | -1.0830457 | -1.0579312 | DHRS12      | XM_001233772.1 |
| DM04359P1 | 0.11108654 | 1.1648387  | -1.2352976 | -1.0260316 |             |                |
| DM04237P2 | 0.11124793 | 1.0293365  | -1.032972  | -1.1444219 |             |                |
| DM13404P3 | 0.11128082 | -1.104802  | 1.0132507  | -1.3427743 |             |                |
| DM09281P2 | 0.11135232 | -1.1096697 | -1.2023004 | -1.2326608 |             |                |
| DM00444P1 | 0.11135671 | -1.3491266 | 1.0092882  | -1.1227509 | LOC733099   | NM_001047046.1 |
| DM09698P2 | 0.11137611 | 1.4014578  | 1.2793221  | 1.1926317  |             |                |
| DM08483P1 | 0.11140869 | 1.159915   | 1.7222013  | -2.447509  |             |                |
| DM08647P2 | 0.11142392 | -1.0456618 | 1.117973   | -1.0840869 |             |                |
| DM13877P4 | 0.11149268 | -1.1959277 | 1.2226655  | 1.6825402  | DNJ3        | XM_001696900.1 |
| DM11272P1 | 0.11150613 | 1.2596588  | 1.6389129  | 1.5011692  |             |                |
| DM05572P2 | 0.11151224 | -1.433297  | -1.2813431 | -1.0208395 |             |                |
| DM04922P3 | 0.1115235  | 1.3050134  | -1.3115579 | -1.1071712 |             |                |
| DM12538P4 | 0.11154396 | -1.0392519 | 1.069481   | 1.2129809  |             |                |
| DM13221P3 | 0.11156937 | -1.0102612 | -1.4485648 | -1.7246091 |             |                |
| DM09134P1 | 0.1117446  | -1.091453  | 1.1219167  | 1.3949142  |             |                |
| DM07581P2 | 0.11174563 | 1.4744568  | 1.1327169  | -1.2646613 |             |                |
| DM13503P1 | 0.11185184 | -1.2882593 | -1.0166483 | -1.1161926 |             |                |
| DM10151P3 | 0.11188144 | 1.1723047  | 1.3149619  | 1.2699543  |             |                |
| DM06312P3 | 0.11197797 | -1.1281127 | -1.126227  | -1.0190313 |             |                |
| DM09608P2 | 0.11198928 | -1.1186353 | 1.0408832  | 1.1480106  |             |                |
| DM04839P3 | 0.11200684 | 1.1318843  | 1.2712202  | -1.3012947 |             |                |
| DM13538P4 | 0.11202799 | 1.1835608  | -1.3305882 | 1.0710771  |             |                |
| DM07745P3 | 0.11204094 | -1.1918643 | 1.1004133  | -1.2602495 |             |                |
| DM14014P1 | 0.11205445 | 1.2048304  | 1.2487795  | 1.3155402  |             |                |
| DM03759P3 | 0.11205645 | -1.136474  | 1.0274196  | -1.2844073 |             |                |
| DM07274P1 | 0.11206583 | 1.1474633  | 1.0974414  | -1.108533  |             |                |
| DM10581P1 | 0.11209312 | 1.0502694  | 1.0990522  | -1.0283467 |             |                |
| DM05517P3 | 0.11210594 | 1.0278599  | 1.0931528  | -1.0025781 |             |                |
| DM13045P2 | 0.11218077 | -1.4258975 | 1.1207578  | 1.1159573  |             |                |
| DM05510P2 | 0.11218829 | 1.1818905  | -1.1364514 | 1.7221931  | CG31523     | NM_169008.2    |
| DM02263P2 | 0.11223141 | 1.5892053  | 2.0060573  | 2.1492424  |             |                |
| DM10100P2 | 0.11224052 | -1.1160198 | 1.0498742  | 1.331101   |             |                |
| DM07169P2 | 0.11226869 | 1.0725204  | 1.1516806  | -1.2230216 |             |                |
| DM00803P1 | 0.11235969 | -1.0156895 | 1.0520891  | -1.0731021 | NEMVEDRAFT  | XM_001634435.1 |
| DM01625P3 | 0.11240667 | 1.0597498  | 1.012457   | 1.1293042  | LOC10010111 | NM_001099620.1 |
| DM08944P1 | 0.11245933 | 1.1731733  | -2.1779895 | 1.2413688  |             |                |
| DM05871P2 | 0.11254949 | 1.1045094  | 1.603592   | 1.6615688  |             |                |
| DM07146P3 | 0.11255828 | -1.2249959 | -1.2053877 | -1.198697  |             |                |
| DM02520P3 | 0.1126798  | -1.8026944 | -1.6823552 | -1.6217979 | SUFU        | XM_002591522.1 |
| DM05907P3 | 0.11269898 | -1.1795834 | -1.2100168 | -1.1438601 | LOC1001591  | XM_001942955.1 |
| DM11936P1 | 0.11277593 | 2.10477    | 4.115713   | 2.4064739  |             |                |
| DM12456P2 | 0.11277904 | -1.052843  | -1.3811004 | 1.1768376  |             |                |
| DM07650P1 | 0.11278784 | 1.2013643  | 1.1662279  | -1.2366999 |             |                |
| DM12305P1 | 0.11292503 | 1.2281975  | 1.1271055  | -1.0103431 |             |                |
| DM13581P1 | 0.11296755 | 1.4080702  | -1.0249001 | 2.550217   |             |                |
| DM07252P1 | 0.11298753 | 1.2538617  | 1.2884092  | 1.2187315  |             |                |
| DM08405P4 | 0.11299288 | -1.0415998 | -1.0612912 | -1.1974076 |             |                |

|           |            |            |            |            |             |                 |
|-----------|------------|------------|------------|------------|-------------|-----------------|
| DM05787P4 | 0.11304535 | 1.0765779  | -1.2633692 | -1.0406691 |             |                 |
| DM05314P2 | 0.11304542 | 1.0729485  | 1.1347569  | -1.3432848 |             |                 |
| DM12490P2 | 0.11314549 | 1.2644492  | 1.0648103  | 1.4846681  |             |                 |
| DM15037P3 | 0.11314896 | -1.0850943 | 1.0531948  | 1.3285655  |             |                 |
| DM10285P2 | 0.11317369 | -1.1020615 | 1.3961155  | 1.0438391  |             |                 |
| DM11620P1 | 0.11322817 | 1.273561   | -1.0261688 | -1.0734675 |             |                 |
| DM06572P2 | 0.11323568 | -1.0255492 | 1.128176   | 1.0438678  | SINA        | XM_394284.2     |
| DM10419P2 | 0.11323839 | 1.6850665  | 2.5734863  | -1.0381185 |             |                 |
| DM01686P3 | 0.11325681 | 1.1373025  | -1.0051019 | 1.2159727  | ARR         | XM_001663682.1  |
| DM11421P2 | 0.11336155 | -1.0872103 | 1.2100465  | -1.0950623 |             |                 |
| DM14374P1 | 0.11351185 | -1.1118388 | -1.0278562 | -1.187446  |             |                 |
| DM12551P4 | 0.11355358 | -1.0745293 | -1.1070981 | 1.1039561  |             |                 |
| DM07411P2 | 0.11357246 | -1.133708  | 1.0684075  | 1.1374227  |             |                 |
| DM04944P3 | 0.11370464 | 1.1117523  | -1.0241582 | -1.2230821 |             |                 |
| DM06266P2 | 0.11373881 | 1.1194996  | 1.1737634  | 1.487736   |             |                 |
| DM14068P1 | 0.11387136 | 1.0484743  | -1.1477535 | 1.0077394  |             |                 |
| DM02800P3 | 0.11396021 | 1.0207291  | 1.0265431  | 1.1673664  | DSEC\GM221  | XM_002040743.1  |
| DM08924P1 | 0.11397272 | -1.1572025 | -1.227281  | -1.0932661 |             |                 |
| DM00020P3 | 0.11404555 | -1.3513736 | -1.9426118 | -1.3745371 | TB927.3.105 | (XM_838607.1    |
| DM14882P1 | 0.11412256 | 1.1891086  | 1.3238925  | 1.6272868  | DSEC\GM216  | XM_002034078.1  |
| DM06275P4 | 0.11421178 | -1.1044062 | -1.1960261 | -1.0364873 | LOC1001237  | (XM_001607350.1 |
| DM11890P1 | 0.11421625 | -1.303327  | -1.3647869 | -1.1987587 |             |                 |
| DM06025P2 | 0.11425708 | 1.0558017  | -1.2146497 | -1.1917851 |             |                 |
| DM09177P1 | 0.11448182 | -1.1900374 | 1.0341042  | 1.5066891  |             |                 |
| DM04494P3 | 0.11453211 | 1.0403291  | 1.1539475  | -1.2332377 |             |                 |
| DM12909P1 | 0.11454313 | -1.2887142 | -1.0535104 | 1.0060524  |             |                 |
| DM00861P2 | 0.11455106 | 1.124985   | -1.3005236 | 1.3192866  | ACYPI001676 | NM_001161965.1  |
| DM01600P2 | 0.11461907 | -1.1521317 | -1.0697129 | -1.0737138 | DWIL\GK125  | (XM_002067803.1 |
| DM08166P3 | 0.11464161 | -1.0274408 | -1.0163716 | 1.111813   |             |                 |
| DM09732P1 | 0.11465474 | 1.0452821  | -1.1821524 | -1.2800583 |             |                 |
| DM00597P2 | 0.11467834 | 1.452803   | 1.4286948  | 1.4697828  | DWIL\GK226  | :XM_002072005.1 |
| DM08420P4 | 0.11474676 | -1.1740184 | -1.0605328 | -1.2260467 | LOC1000555  | XM_001916283.1  |
| DM04191P4 | 0.11483076 | 1.4976981  | 1.7368879  | 1.428619   |             |                 |
| DM14563P2 | 0.11492585 | -1.0834775 | 1.1529838  | 1.4162961  |             |                 |
| DM10118P3 | 0.11507269 | 1.0386307  | -1.1004841 | -1.1252159 |             |                 |
| DM09171P1 | 0.11511714 | -1.0689325 | 1.1994905  | -1.012198  |             |                 |
| DM13076P1 | 0.11515103 | -1.0272461 | 1.1564425  | 1.2519715  |             |                 |
| DM10952P3 | 0.11515568 | 1.0057288  | -1.27791   | -1.2501696 |             |                 |
| DM07840P1 | 0.11527794 | -1.155636  | -1.3118097 | -1.1205341 |             |                 |
| DM14224P3 | 0.11531667 | -1.255563  | -1.0223252 | -1.0723097 |             |                 |
| DM00360P1 | 0.11537276 | -1.0249698 | -1.0589606 | -1.1540254 | LOC551599   | XM_623990.2     |
| DM06404P1 | 0.11542218 | 1.0034208  | -1.5427738 | 1.1024485  |             |                 |
| DM01635P4 | 0.11546356 | -1.1238842 | -1.1026701 | -1.2700008 | CG31549     | NM_169083.1     |
| DM09082P1 | 0.11549719 | -1.0871775 | -1.294632  | -1.3439385 |             |                 |
| DM05290P3 | 0.11549831 | 1.2728374  | 1.2820697  | 1.5990037  |             |                 |
| DM05911P2 | 0.1155277  | -1.1322035 | -1.0185822 | 1.2228632  |             |                 |
| DM04233P1 | 0.11555279 | 1.1126052  | 1.223487   | -1.0337163 |             |                 |
| DM05511P3 | 0.11557604 | -1.183071  | 1.0801722  | 1.1540203  |             |                 |
| DM05672P1 | 0.11558156 | 1.0025182  | -1.0146165 | 1.1632113  |             |                 |
| DM06143P2 | 0.11558989 | -1.257601  | -1.0161046 | 1.1987926  |             |                 |



|           |            |            |            |            |             |                |
|-----------|------------|------------|------------|------------|-------------|----------------|
| DM08899P2 | 0.11559492 | 2.077219   | 4.417744   | 2.0265002  |             |                |
| DM07883P3 | 0.11564907 | -1.3393831 | 1.0087419  | -1.0346228 |             |                |
| DM09437P3 | 0.11574543 | 1.2248353  | 1.3025095  | 1.0652652  |             |                |
| DM01066P2 | 0.11575824 | 1.0626508  | -1.569212  | 1.0356467  | RHBG2A      | NM_001136097.1 |
| DM00898P1 | 0.11583816 | -1.2944473 | -1.1604397 | 1.2455553  | ALDH1A1     | NM_001087771.1 |
| DM00772P1 | 0.11584121 | 1.0217696  | -1.1659533 | -1.1923469 | LOC551931   | XM_624316.2    |
| DM09259P3 | 0.11584128 | -1.0634943 | -1.0914837 | -1.5509602 |             |                |
| DM02430P3 | 0.11588101 | -1.1039026 | -1.2294722 | 1.1221412  | EPHX1       | NM_001034090.1 |
| DM05532P2 | 0.11589894 | -1.0190276 | -1.0605491 | -1.1875644 |             |                |
| DM01440P3 | 0.11604098 | -1.0859253 | 1.0046132  | 1.0803716  |             |                |
| DM10578P1 | 0.11604374 | -1.1839901 | -1.0721052 | -1.1988387 |             |                |
| DM00868P2 | 0.11611702 | -1.1074926 | 1.2249402  | 1.1036369  |             |                |
| DM08168P1 | 0.11622497 | -1.1909875 | -1.021791  | 1.2928891  |             |                |
| DM13790P1 | 0.11628833 | 1.0215415  | 1.1304655  | 1.3719107  |             |                |
| DM12350P3 | 0.11629195 | 1.1262285  | 1.0642427  | -1.1700764 |             |                |
| DM01273P1 | 0.11629998 | -1.0879791 | -1.0572363 | -1.1800491 | FARSA-B     | NM_001087382.1 |
| DM07720P3 | 0.11630133 | -1.0856869 | -1.0436869 | -1.2227412 |             |                |
| DM03552P2 | 0.11632442 | -1.0633987 | -1.193082  | 1.0698488  | DMOJ\GI1475 | XM_002010276.1 |
| DM09455P3 | 0.11633444 | 1.0394291  | 1.1562748  | 1.0571432  |             |                |
| DM06976P3 | 0.11636983 | -1.2201205 | -1.1601726 | 1.3434578  |             |                |
| DM14341P2 | 0.11638902 | -1.3425201 | -1.1063622 | 1.0423574  | TOMM20      | NM_001099183.1 |
| DM14955P3 | 0.11647207 | 1.0375816  | 1.133655   | -1.0741292 |             |                |
| DM03812P2 | 0.11647869 | 1.0103999  | -1.1727586 | -1.2043794 |             |                |
| DM02850P3 | 0.11649633 | -1.0451906 | -1.6032945 | 1.5824441  | CPA6        | NM_001107900.1 |
| DM05498P2 | 0.11654223 | -1.2080395 | -1.0153366 | -1.0997823 |             |                |
| DM12453P2 | 0.11663996 | 1.1767135  | 1.1469793  | -1.0380071 |             |                |
| DM05142P4 | 0.1166941  | 1.0555975  | -1.8797693 | 1.3192885  |             |                |
| DM08464P1 | 0.11679579 | -1.0276681 | -1.0004625 | -1.2306484 |             |                |
| DM01447P3 | 0.11688822 | -1.1829475 | -1.0066527 | -1.1895189 | DERE\GG243  | XM_001968716.1 |
| DM05156P2 | 0.11691889 | 1.0097556  | 1.0724722  | 1.1463838  |             |                |
| DM03755P2 | 0.11695921 | 1.0746307  | 1.0337325  | -1.1339898 |             |                |
| DM01379P4 | 0.11697742 | 1.345408   | 1.634286   | -1.0097415 |             |                |
| DM13890P1 | 0.11699619 | -1.2126522 | -1.0284505 | -1.1964675 |             |                |
| DM10769P3 | 0.11703324 | 1.1437683  | 1.226315   | -1.0540514 | SULT        | XM_001651870.1 |
| DM05039P2 | 0.11708102 | 1.1381843  | 1.2994381  | 1.3108146  | RPC-1       | NM_068726.3    |
| DM01594P2 | 0.11710939 | -1.1348248 | 1.0659295  | 1.1713687  | DMOJ\GI1205 | XM_002007937.1 |
| DM04562P1 | 0.11713246 | 1.1272603  | -1.1834321 | 1.414565   |             |                |
| DM06641P1 | 0.11713646 | 1.2028708  | -1.1550591 | -1.8681504 |             |                |
| DM13164P2 | 0.11713933 | 1.0391572  | -1.122986  | 1.2511826  |             |                |
| DM07447P3 | 0.11720487 | -1.4011749 | -2.029784  | 2.9868343  |             |                |
| DM11963P2 | 0.11738207 | -1.1556379 | -1.1545349 | -1.2233777 | DSIM\GD206  | XM_002103812.1 |
| DM12604P2 | 0.11741436 | -1.0710098 | -1.2062364 | -1.1536751 |             |                |
| DM00414P1 | 0.11747365 | -1.0261242 | -1.2807491 | -1.0195559 | LOC663521   | XM_001815945.1 |
| DM10349P4 | 0.11755347 | -1.0589364 | 1.0364803  | -1.1908268 | DPER\GL1275 | XM_002026836.1 |
| DM12602P2 | 0.11756035 | 1.1622956  | -3.5668378 | 1.094574   |             |                |
| DM12128P2 | 0.11757697 | -1.1034237 | 1.0074805  | -1.1698179 |             |                |
| DM01908P1 | 0.11759196 | 1.3277898  | -1.7030344 | 1.6112236  |             |                |
| DM02585P2 | 0.1176144  | -1.1413921 | -1.1692389 | -1.0565941 | EIF1A       | NM_001162062.1 |
| DM00704P3 | 0.11770067 | 1.0553206  | -1.0892335 | 1.3787357  | MHC1        | XM_001607253.1 |
| DM03880P2 | 0.11773102 | 1.2163346  | -1.0941671 | 1.489392   |             |                |

|           |            |            |            |            |                            |
|-----------|------------|------------|------------|------------|----------------------------|
| DM13240P1 | 0.11773454 | -1.015568  | 1.0955055  | 1.344518   |                            |
| DM04230P1 | 0.11782154 | 1.1463125  | -1.7256278 | 1.2871608  |                            |
| DM12684P1 | 0.11784825 | 1.06574    | -1.1431677 | -1.2727513 |                            |
| DM01781P2 | 0.11785521 | 1.0228283  | -1.0402876 | -1.1554427 | DVIR\GJ1005 XM_002056700.1 |
| DM08037P1 | 0.11795457 | 1.0735636  | -1.179992  | -1.4603808 |                            |
| DM11438P1 | 0.11798066 | -1.0184132 | 1.2929549  | 1.147941   |                            |
| DM03473P2 | 0.11798361 | -1.0081977 | -1.1000082 | -1.3309324 |                            |
| DM15200P1 | 0.11806198 | -1.2600677 | -1.1206502 | 1.0440259  |                            |
| DM10854P3 | 0.11809305 | 1.2592471  | 1.4090077  | -1.1064245 |                            |
| DM12594P1 | 0.11809773 | -1.1099888 | 1.0340695  | 1.1035085  |                            |
| DM04627P1 | 0.11812621 | 1.2905573  | 1.478216   | -1.0551325 |                            |
| DM07864P3 | 0.11817148 | -1.0348386 | -1.3337295 | -1.1513155 |                            |
| DM11618P1 | 0.11817688 | 1.2439239  | -1.1656338 | -1.4406966 |                            |
| DM01468P1 | 0.11818221 | 1.0274007  | 1.0947797  | -1.0928367 | LOC589308 XM_788952.2      |
| DM00445P2 | 0.1182393  | 1.2082931  | 1.435501   | 1.4127494  | DPER\GL124C XM_002019412.1 |
| DM06978P3 | 0.11828121 | 1.1203871  | -1.052674  | 1.15208    |                            |
| DM08843P1 | 0.11829569 | 1.017317   | -1.6942898 | 1.9272645  |                            |
| DM11999P1 | 0.11835376 | 1.0204294  | 1.059186   | -1.1654656 |                            |
| DM01691P3 | 0.11839557 | 1.0090102  | -1.01653   | 1.0768988  |                            |
| DM10333P3 | 0.1184234  | -1.1555203 | 1.084565   | -1.167722  |                            |
| DM01167P1 | 0.11846197 | -1.3224131 | -1.3913937 | -1.4581013 | DMOJ\GI243 XM_001999043.1  |
| DM13525P1 | 0.11846435 | 1.0573034  | 1.2981249  | 1.2676871  |                            |
| DM04200P1 | 0.11873433 | 1.1660537  | 1.2035162  | 1.3771766  |                            |
| DM07826P1 | 0.11874936 | -1.3392522 | 1.0285366  | 1.2044871  |                            |
| DM11970P3 | 0.11875759 | -1.148111  | -1.1615629 | -1.2007802 |                            |
| DM10911P3 | 0.11876605 | -1.0149688 | -1.0056231 | -1.1887838 |                            |
| DM09895P3 | 0.11883696 | 1.3593831  | -1.2678112 | 1.5252277  |                            |
| DM00370P3 | 0.11887782 | -1.0600165 | -1.0080466 | -1.2598367 | LOC576419 XM_774819.2      |
| DM08032P1 | 0.11888614 | -1.0504367 | 1.263511   | 1.2631757  |                            |
| DM05648P2 | 0.11893859 | 1.1384046  | -1.0668656 | 1.2929928  |                            |
| DM05952P1 | 0.1190599  | 1.1379205  | 1.2954699  | 1.1521477  |                            |
| DM13395P4 | 0.11910647 | -1.1268487 | 1.1784388  | 1.0172495  |                            |
| DM01244P1 | 0.11913668 | 1.1303264  | 1.406193   | 1.5327938  |                            |
| DM12145P1 | 0.11914907 | 1.003012   | -1.0590154 | -1.2092383 | LOC724505 XM_001120377.1   |
| DM10912P3 | 0.11917378 | 1.0056963  | 1.0671406  | -1.1949462 |                            |
| DM12828P4 | 0.11918226 | -1.1807207 | -1.1742212 | -1.2066433 |                            |
| DM04403P1 | 0.11934549 | -1.3580241 | -1.0980877 | -1.0057874 |                            |
| DM14957P2 | 0.1194254  | 1.025818   | -1.0199543 | 1.2483392  |                            |
| DM04337P2 | 0.1194434  | -1.39252   | -1.096126  | 1.063593   | LOC660308 XM_966551.2      |
| DM01819P3 | 0.11945604 | 1.1155164  | 1.0037143  | 1.4042944  | BCKDHB NM_174507.2         |
| DM12076P3 | 0.11947586 | 1.2241056  | 1.3674781  | -1.0476362 |                            |
| DM09173P1 | 0.11949503 | 1.0682269  | 1.0411057  | 1.3198503  |                            |
| DM01683P3 | 0.11956049 | 1.0030587  | -1.1485265 | -1.1540617 | DPER\GL211 XM_002023060.1  |
| DM12281P2 | 0.11956485 | -1.303289  | -1.1671367 | -1.1257019 |                            |
| DM09751P3 | 0.1197232  | -1.0893219 | -1.1641446 | 1.0063983  |                            |
| DM02823P1 | 0.11973731 | 1.0551896  | 1.0373247  | 1.2861195  | LOC1001748 NM_001130902.1  |
| DM00831P1 | 0.11976423 | 1.066281   | -1.196365  | -1.2371073 | LOC410606 XM_394084.3      |
| DM14109P1 | 0.11980018 | 1.0048743  | -1.4226911 | -1.1945689 | LOC1001646 XM_001945973.1  |
| DM04196P4 | 0.11990225 | 1.0864933  | 1.203543   | 1.145493   |                            |
| DM08193P2 | 0.12000702 | 1.0583223  | -1.1797495 | 1.5220032  |                            |

|           |            |            |            |            |             |                |
|-----------|------------|------------|------------|------------|-------------|----------------|
| DM06069P1 | 0.1200356  | -1.0354443 | -1.0889987 | -1.2259473 | LOC1001668  | XM_001943630.1 |
| DM10522P2 | 0.12005674 | 1.0294986  | -1.1133312 | 1.1073017  |             |                |
| DM01341P1 | 0.12007679 | 1.1237234  | 1.0767891  | -1.1821862 | LOC732920   | NM_001046920.1 |
| DM07705P3 | 0.12028556 | -1.145426  | 1.0631557  | -1.0050006 |             |                |
| DM07012P1 | 0.12040419 | 1.0475065  | -1.0748705 | -1.1368489 |             |                |
| DM14721P1 | 0.12042195 | 1.0735222  | -1.385482  | 1.146846   |             |                |
| DM03097P1 | 0.12044812 | -1.0917963 | -1.1526899 | -1.2518343 | TBCB        | NM_001040180.1 |
| DM03618P2 | 0.12045024 | -1.0778729 | 1.1504632  | 1.060002   |             |                |
| DM11810P1 | 0.12047714 | 1.1837327  | 1.0574709  | -1.2111069 |             |                |
| DM12569P2 | 0.12051188 | -1.1048504 | -1.0437458 | 1.2060055  |             |                |
| DM05755P2 | 0.12063113 | 2.3504415  | 2.3904164  | 1.4842279  |             |                |
| DM08028P1 | 0.12064686 | 1.2032757  | 1.1109619  | 1.7468305  |             |                |
| DM00850P2 | 0.1208615  | -1.0266103 | -1.2596762 | 1.0739486  | VINC        | XR_014976.1    |
| DM12421P3 | 0.12086729 | 1.0797355  | 1.1440241  | 1.3085032  |             |                |
| DM05795P3 | 0.1209693  | 1.051687   | 1.3821956  | 1.3322197  | LOC1000167  | XM_001370463.1 |
| DM14451P1 | 0.12097326 | -1.3239921 | 1.1685524  | 1.2567145  |             |                |
| DM02206P3 | 0.12098676 | 1.0372574  | 1.130952   | -1.1558197 |             |                |
| DM06243P2 | 0.12098837 | 1.4730419  | 1.7736008  | 1.0128767  |             |                |
| DM11105P2 | 0.12100804 | -1.0021077 | 1.13688    | -1.1020024 |             |                |
| DM07956P2 | 0.12103681 | 1.0212342  | 1.3417288  | 1.2520181  |             |                |
| DM07664P3 | 0.12115134 | 1.0667714  | 1.2077595  | -1.106729  |             |                |
| DM03279P2 | 0.12120967 | 1.0361242  | 1.2099843  | -1.1873456 | LOC410541   | XM_394020.3    |
| DM11194P1 | 0.12128353 | -1.3538778 | 1.5421585  | 1.0861338  |             |                |
| DM10521P3 | 0.12131573 | -1.3602618 | 1.0910103  | -1.3614557 |             |                |
| DM13138P2 | 0.12139223 | -1.2717652 | -1.2555778 | 1.1130509  |             |                |
| DM07445P2 | 0.1214299  | -1.0192566 | 1.0664238  | -1.1663557 |             |                |
| DM01168P1 | 0.121465   | 1.0030961  | -1.2058429 | -1.1604834 | TRIADDRAFT  | XM_002109514.1 |
| DM15191P2 | 0.12151123 | 1.1736451  | 1.2339334  | 1.3894877  |             |                |
| DM11690P3 | 0.12159541 | 1.0476815  | 1.131841   | -1.0913532 |             |                |
| DM11383P3 | 0.12160794 | -1.0087116 | 1.2153788  | 1.1339234  |             |                |
| DM01212P1 | 0.12161891 | 1.1660321  | 1.3200129  | 1.0629517  |             |                |
| DM10632P1 | 0.12172733 | -1.2022845 | -1.0072659 | -1.3141396 |             |                |
| DM12377P1 | 0.12176354 | 1.0879124  | -1.2000223 | 1.2844055  |             |                |
| DM05367P3 | 0.12176421 | 1.0517806  | 1.1488492  | 1.4080725  |             |                |
| DM05959P1 | 0.12176892 | -1.1102082 | -1.0446528 | 1.0627321  | DGRIV\GH121 | XM_001991318.1 |
| DM02465P3 | 0.12178715 | 1.132043   | 1.114067   | -1.0082103 |             |                |
| DM03415P2 | 0.12184845 | 1.1222007  | -1.1665304 | 1.3854846  | DERE\GG219  | XM_001974728.1 |
| DM06688P1 | 0.12192396 | -1.1393757 | -1.1388855 | -1.1656997 | LOC1001219  | XM_001605544.1 |
| DM13724P3 | 0.12192994 | 1.5479206  | -1.1039268 | 1.8777628  |             |                |
| DM00078P3 | 0.12193105 | -1.060347  | -1.0276377 | -1.157311  | LOC579320   | XM_001189637.1 |
| DM07206P1 | 0.12204391 | -1.0659704 | -1.0667574 | -1.1746092 |             |                |
| DM08986P1 | 0.12208987 | 1.2749021  | -1.4642394 | 1.0263433  |             |                |
| DM12518P1 | 0.12214613 | 1.1088543  | 1.108113   | 1.3069749  |             |                |
| DM02059P1 | 0.12215249 | -1.2543591 | -1.161841  | -1.0465024 | LOC551106   | XM_623502.2    |
| DM06942P2 | 0.12224354 | 1.3846525  | -1.049088  | -1.2724357 |             |                |
| DM02972P1 | 0.12227655 | -1.1054016 | -1.1344513 | 1.3542802  |             |                |
| DM10696P3 | 0.12243603 | 1.1370337  | 1.2162303  | -1.0885394 |             |                |
| DM07120P3 | 0.12247501 | -1.2457724 | -1.1739823 | 1.2030443  |             |                |
| DM01918P2 | 0.12247901 | 1.2046473  | 1.0933632  | 1.134155   | LOC1002158  | XR_053725.1    |
| DM02017P1 | 0.12248752 | -1.076064  | 1.0109979  | 1.0172502  | DMOJ\GI209  | XM_002003789.1 |

|           |            |            |            |            |                           |
|-----------|------------|------------|------------|------------|---------------------------|
| DM01664P2 | 0.12250887 | 1.0951296  | -1.0699271 | -1.2424943 | DMOJ\GI235\XM_001998534.1 |
| DM12252P1 | 0.12254793 | 1.1788915  | 1.4698285  | 1.1826152  |                           |
| DM00494P2 | 0.12257626 | 1.113011   | -1.0261077 | -1.1960099 | TESK2 NM_001110476.1      |
| DM06326P2 | 0.12265547 | -1.9710617 | -2.1747298 | -1.805609  |                           |
| DM11071P1 | 0.12266089 | -1.1409907 | -1.2305312 | -1.3307545 |                           |
| DM12096P4 | 0.12268604 | 1.3125116  | 1.307364   | 1.4475578  |                           |
| DM11494P1 | 0.12273815 | -1.0860646 | -1.1586778 | -1.1183882 |                           |
| DM01211P1 | 0.12274045 | 1.1363051  | 1.3268634  | 1.519327   | PFKFB1 NM_001143721.1     |
| DM12370P2 | 0.12276427 | 1.0478516  | 1.0911326  | -1.1607229 |                           |
| DM07733P1 | 0.12280771 | 1.1777436  | -1.0500765 | -1.0010203 |                           |
| DM00423P1 | 0.1228378  | 1.0330288  | 1.0210469  | -1.1896223 | NEMVEDRAFT XM_001641722.1 |
| DM12753P1 | 0.12285124 | -1.1814427 | -1.0556885 | -1.5063174 |                           |
| DM10301P1 | 0.12289768 | -1.4820017 | 1.2163905  | -1.0643141 |                           |
| DM04042P4 | 0.12291662 | 1.4034402  | -1.0618736 | -1.5852091 | POPTRDRAFT XM_002335211.1 |
| DM13315P1 | 0.12307597 | 1.1677997  | -2.1223607 | -1.4035163 |                           |
| DM05247P1 | 0.12307888 | -1.0321444 | 1.0614246  | -1.249986  |                           |
| DM01084P1 | 0.12307955 | 1.071427   | -1.1407841 | -1.0652881 |                           |
| DM12129P1 | 0.12314361 | 1.1110587  | 1.1577291  | 1.078817   |                           |
| DM03037P4 | 0.12314771 | 1.6642677  | 1.6257436  | -1.0398748 |                           |
| DM06840P2 | 0.12324346 | 1.4202355  | 2.368488   | 1.0620229  |                           |
| DM08002P3 | 0.12328264 | 1.0776472  | -1.01871   | 1.2665961  |                           |
| DM08872P1 | 0.12331609 | 1.4462805  | 1.3453355  | -1.0092518 |                           |
| DM03359P1 | 0.12333085 | -1.0577753 | -1.4654136 | 1.2225214  | DPER\GL179\XM_002024775.1 |
| DM10835P2 | 0.12340509 | 1.0543298  | -1.1651427 | -1.1621907 |                           |
| DM02734P1 | 0.12348161 | -1.1586338 | -1.1648291 | 1.0843327  | AAEL_AAEL\XM_001654068.1  |
| DM08512P2 | 0.12353816 | -1.0681655 | 1.1972598  | -1.0699592 |                           |
| DM12442P2 | 0.12360549 | 1.0563048  | 1.0336341  | -1.4391751 |                           |
| DM01527P2 | 0.12371146 | 1.08745    | -1.1320741 | -1.1549746 | PAPSS1 NM_001034210.1     |
| DM12612P3 | 0.12372991 | -1.2556103 | -1.017235  | -1.350114  |                           |
| DM14104P2 | 0.12389027 | -1.1943634 | -1.1374915 | -1.0495387 |                           |
| DM04062P3 | 0.12390022 | -1.1417845 | -1.2642542 | -1.2607553 |                           |
| DM05739P1 | 0.12391346 | -1.0423845 | 1.0261848  | 1.0835541  | DYAK\GE247\XM_002096945.1 |
| DM06710P2 | 0.12395289 | 1.0016034  | 1.7302402  | -1.5149844 |                           |
| DM11732P1 | 0.12395304 | 1.0158136  | 1.0166963  | -1.2399056 |                           |
| DM10550P1 | 0.12396029 | 1.0274696  | 1.2306623  | 1.4004107  |                           |
| DM01994P4 | 0.12407236 | -1.1961088 | -1.0131692 | 1.2171335  | RPS7 NM_200752.1          |
| DM12974P2 | 0.12415715 | 1.5824368  | -1.8382316 | 2.1868396  |                           |
| DM05355P4 | 0.12417529 | -1.0262538 | 1.0775054  | -1.221503  | TRIADDRAFT XM_002108018.1 |
| DM05982P1 | 0.12418533 | -1.0436184 | 1.026092   | 1.0882332  | LOC1001195\XM_001603673.1 |
| DM00275P1 | 0.12420804 | -1.0537297 | -1.0007497 | -1.1736234 | LOC659477 XM_965781.2     |
| DM02982P3 | 0.12423465 | -1.0745791 | -1.208537  | -1.0384877 | LOC1000089\NM_001082173.1 |
| DM02706P2 | 0.12432299 | -1.0581194 | 1.2575696  | 1.1957803  |                           |
| DM03863P2 | 0.12437985 | -1.1922402 | -1.175139  | -1.4091299 | DSIM\GD168 XM_002106283.1 |
| DM10481P3 | 0.1244197  | 1.0494485  | -1.2171221 | -1.0808492 |                           |
| DM14877P1 | 0.12442571 | -1.6732118 | -1.1622567 | 1.0704768  |                           |
| DM13974P3 | 0.12442969 | 1.2090522  | 1.1699679  | 1.2567964  |                           |
| DM07787P3 | 0.12445754 | -1.0984292 | 1.0678529  | 1.160485   |                           |
| DM04901P3 | 0.12447886 | -1.1170026 | -1.3109845 | 1.0997384  |                           |
| DM15204P1 | 0.1244932  | 1.1814315  | -1.4184844 | 1.1631148  |                           |
| DM05754P1 | 0.12450146 | -1.1371574 | -1.4202276 | -1.3910177 |                           |

|           |            |            |            |            |            |                |
|-----------|------------|------------|------------|------------|------------|----------------|
| DM05301P3 | 0.12461828 | 1.044006   | -1.2527596 | -1.2737541 |            |                |
| DM13910P1 | 0.1246606  | 1.1243799  | -1.3709311 | 1.4790765  |            |                |
| DM08160P3 | 0.12466496 | -1.0678276 | -1.155757  | 1.3632833  |            |                |
| DM00614P2 | 0.12470894 | -1.0761783 | -1.2473302 | -1.3484656 | DBP80      | XM_624943.2    |
| DM03465P1 | 0.12472632 | -1.9761493 | -1.9082718 | -1.7735082 | DWIL\GK208 | XM_002061251.1 |
| DM08409P3 | 0.12473812 | 1.1444846  | -1.7616743 | -1.3218131 |            |                |
| DM03708P2 | 0.12479989 | -1.1049896 | -1.0917699 | -1.2574804 | METTL6     | NM_152396.2    |
| DM09582P4 | 0.1248111  | -1.3699257 | -1.2181888 | -1.492761  |            |                |
| DM05958P1 | 0.12482268 | -1.0976826 | 1.1280693  | 1.2679003  | DPSE\GA150 | XM_001352697.2 |
| DM03894P2 | 0.12486619 | 1.1120405  | 1.1623433  | 1.1291595  | LOC410635  | XM_394112.3    |
| DM08365P2 | 0.12489321 | 1.5459721  | -1.1311707 | -1.0994427 |            |                |
| DM06711P1 | 0.124953   | -1.0045518 | 1.1917568  | -1.272517  |            |                |
| DM05230P3 | 0.1249622  | -1.0605639 | 1.4775567  | -1.1066979 |            |                |
| DM02241P1 | 0.12519783 | -1.0460671 | -1.2014463 | -1.3295679 | LOC1001630 | XM_001946396.1 |
| DM12505P1 | 0.12528552 | -1.0857508 | -1.1221898 | -1.2763913 |            |                |
| DM00364P3 | 0.12532741 | 1.0520065  | 1.0151482  | -1.2230515 | LOC733132  | NM_001047079.1 |
| DM03804P1 | 0.12533829 | -1.1397117 | 1.0309895  | -1.1680737 |            |                |
| DM04918P2 | 0.12535392 | 1.1910293  | -1.3984451 | 1.0686648  | PTPRN      | NM_001130588.1 |
| DM06364P2 | 0.12541412 | -1.1955283 | 1.0345958  | 1.2768098  |            |                |
| DM14426P1 | 0.12548634 | 1.0984495  | 1.2289526  | 1.183235   |            |                |
| DM02980P3 | 0.12549269 | -1.3230147 | -1.2270701 | 1.0183266  | DWIL\GK226 | XM_002072051.1 |
| DM01695P3 | 0.12555318 | -1.3221635 | -1.1050142 | 1.1433349  | CYC1       | XM_001661963.1 |
| DM13970P1 | 0.12565756 | -1.3677695 | -1.1314473 | -1.1515114 |            |                |
| DM04819P1 | 0.12568957 | -1.3373435 | -1.0294709 | -1.1222488 |            |                |
| DM03609P2 | 0.12569357 | -1.0255715 | 1.1603802  | -1.0274323 | LOC1001139 | XM_001600409.1 |
| DM02098P3 | 0.12570962 | 1.0701821  | 1.1014279  | -1.1505231 | VPS26      | XM_396685.3    |
| DM05915P1 | 0.12571007 | -1.2810866 | -1.0465081 | 1.254732   |            |                |
| DM06646P1 | 0.12573256 | -1.2339195 | -1.2695477 | -1.5192442 |            |                |
| DM02558P3 | 0.12574762 | -2.043825  | -1.993551  | -1.7458718 | LOC582036  | XM_782012.2    |
| DM11371P1 | 0.12576337 | 1.0279801  | 1.1491247  | -1.2274177 |            |                |
| DM08615P1 | 0.1257664  | -1.7117195 | 1.0053034  | -1.5819526 | MTIF2      | XM_001265260.1 |
| DM11857P2 | 0.12582396 | -1.0389903 | 1.158966   | -1.1524003 |            |                |
| DM05508P3 | 0.1259812  | -1.1890904 | -1.0924143 | 1.1099163  | AGAP_AGAP0 | XM_313657.4    |
| DM09705P4 | 0.12602215 | 1.8119651  | 1.7081858  | 1.2042978  |            |                |
| DM01491P3 | 0.1260688  | 1.064809   | -1.0800418 | 1.01424    | DWIL\GK163 | XM_002067232.1 |
| DM11333P1 | 0.12609749 | 1.200067   | -1.0917699 | 1.1960769  |            |                |
| DM09801P2 | 0.12614727 | 1.1683916  | 1.4432635  | 1.4879572  |            |                |
| DM01362P1 | 0.1261616  | 2.0044582  | 3.0612078  | 1.1600007  |            |                |
| DM02916P3 | 0.12616548 | -1.088356  | -1.0798248 | -1.209482  | LOC1001154 | XM_001599195.1 |
| DM06759P1 | 0.12630895 | -1.2301525 | -1.251779  | -1.4925312 |            |                |
| DM14633P3 | 0.12633675 | 1.0005369  | -1.349014  | 1.4318993  |            |                |
| DM06467P1 | 0.12633766 | 1.0060545  | 1.0920244  | -1.1763138 |            |                |
| DM03596P1 | 0.12641999 | -1.0446243 | -1.0438899 | -1.0927943 | DERE\GG188 | XM_001977053.1 |
| DM01662P1 | 0.1264333  | -1.028797  | -1.1863991 | -1.1140963 | TRIADDRAFT | XM_002110486.1 |
| DM00403P4 | 0.12648875 | -1.024521  | -1.0040007 | -1.1904048 | RPC11      | NM_001160530.1 |
| DM09424P3 | 0.1264924  | -1.012426  | 1.1028019  | 1.1865797  |            |                |
| DM10193P2 | 0.12650327 | -1.0567749 | 1.018095   | -1.1589684 |            |                |
| DM09548P1 | 0.12653568 | 1.0241796  | 1.1304045  | -1.033104  |            |                |
| DM10434P2 | 0.12656255 | -1.1632499 | -1.0121683 | -1.8390241 |            |                |
| DM12289P3 | 0.12657548 | -1.0553038 | -1.1795645 | 1.0654728  |            |                |

|           |            |            |            |            |            |                |
|-----------|------------|------------|------------|------------|------------|----------------|
| DM09495P1 | 0.12658416 | 1.0762029  | 1.1248555  | -1.1009707 |            |                |
| DM06227P1 | 0.12676093 | -1.3538443 | -1.1679448 | -1.2738264 | MSBP       | NM_001168673.1 |
| DM14302P2 | 0.12677243 | -1.1968069 | -1.115575  | 1.4294915  |            |                |
| DM12298P2 | 0.1268123  | 2.191223   | 1.8002028  | 1.5876696  |            |                |
| DM04552P3 | 0.1268347  | -1.0775183 | -1.3478947 | -1.147222  |            |                |
| DM12835P1 | 0.12686849 | 1.2447091  | 1.533484   | 1.6671295  |            |                |
| DM06857P2 | 0.12695101 | -1.149333  | -1.0550567 | 1.3274611  | CP37       | NM_001172246.1 |
| DM02640P3 | 0.12701389 | 1.2921182  | 1.0014772  | 1.1914316  | LOC1001748 | NM_001130902.1 |
| DM07016P1 | 0.12702824 | -1.1568947 | -1.1088179 | -1.1587727 |            |                |
| DM07984P1 | 0.1270442  | -1.0577073 | 1.1267129  | 1.2324003  |            |                |
| DM08563P3 | 0.12705153 | 1.1127983  | 1.1023233  | 1.171269   |            |                |
| DM01968P1 | 0.12708177 | -1.1700304 | 1.0792918  | 1.4532589  | DANA\GF239 | XM_001957652.1 |
| DM06892P2 | 0.12708397 | -1.3264967 | 1.0526294  | 1.3737282  |            |                |
| DM02199P3 | 0.12714164 | -1.0864025 | -1.155345  | 1.0362141  | GNA        | XM_001858577.1 |
| DM00446P2 | 0.12717892 | -1.0135334 | 1.2045089  | -1.1524384 | DCC        | NM_001034985.1 |
| DM09267P4 | 0.12731713 | 1.0081135  | -1.0630177 | -1.2366489 |            |                |
| DM08039P4 | 0.1273221  | -1.0932306 | -1.2678728 | -1.0279754 |            |                |
| DM03853P2 | 0.12734275 | -1.1253682 | 1.0373225  | -1.0111482 | LOC1001833 | XM_002132085.1 |
| DM12315P2 | 0.12748347 | -1.1077169 | 1.0624285  | -1.0821104 |            |                |
| DM06474P3 | 0.12748599 | -1.1309713 | -1.1242516 | -1.3206422 |            |                |
| DM05358P1 | 0.12752068 | -1.1314676 | -1.2336402 | 1.051      |            |                |
| DM04095P3 | 0.12754542 | 1.3093321  | 1.176345   | -1.5002733 | BRAFLDRAFT | XM_002591642.1 |
| DM05332P1 | 0.12759589 | -1.263096  | -1.1699516 | 1.0847604  | BRAFLDRAFT | XM_002612393.1 |
| DM12389P2 | 0.12761542 | -1.1744357 | 1.090453   | -1.1899822 |            |                |
| DM00703P4 | 0.12776391 | -1.1790462 | -1.208638  | -1.0768989 | LOC1001687 | XM_001951915.1 |
| DM09669P1 | 0.12778921 | 1.0826001  | 1.0454661  | -1.2657157 |            |                |
| DM10829P2 | 0.12783632 | -1.044432  | -1.0069306 | -1.2144572 |            |                |
| DM12212P2 | 0.12786786 | 1.0976301  | -1.0299116 | -1.114489  |            |                |
| DM09908P2 | 0.12788367 | -1.0981342 | 1.0022107  | -1.1870304 | EIF4E1B    | XM_866118.1    |
| DM08000P2 | 0.12807067 | -1.1118729 | -1.2728223 | -1.1829457 |            |                |
| DM04285P3 | 0.12810348 | -1.1681683 | -1.1314396 | -1.1840144 | LOC1001192 | XM_001602988.1 |
| DM03947P2 | 0.12813415 | 1.357326   | 1.1038742  | 1.0102975  |            |                |
| DM09186P1 | 0.12815551 | -1.2465594 | -1.055689  | -1.0770533 |            |                |
| DM01416P1 | 0.12817235 | -1.1652818 | -1.095233  | -1.1843711 |            |                |
| DM10119P2 | 0.12817836 | -1.0911576 | -1.0442947 | 1.2075437  |            |                |
| DM09927P2 | 0.12818481 | 1.0627078  | 1.3215871  | 1.2084943  |            |                |
| DM00872P1 | 0.12820165 | 1.0405477  | -1.1818997 | 1.0825016  | DYAK\GE194 | XM_002090034.1 |
| DM07316P3 | 0.12827758 | -1.1136069 | 1.0775622  | 1.6092048  |            |                |
| DM14747P2 | 0.12830436 | 1.0711198  | -1.1455353 | 1.0819314  |            |                |
| DM02573P2 | 0.12841298 | 1.1287704  | 1.4411542  | 1.7471198  | LOC551465  | XM_623860.1    |
| DM01226P1 | 0.12841412 | 1.1066933  | -1.3449225 | -1.0908265 | LOC412541  | XM_395996.3    |
| DM10905P2 | 0.12846774 | -1.1790073 | 1.0113897  | -1.1031144 |            |                |
| DM00752P1 | 0.12848985 | -1.3091863 | -1.2641855 | -1.3348769 | LOC588782  | XM_001188820.1 |
| DM01241P1 | 0.1285118  | -1.1504204 | -1.2214884 | -1.3624368 | 2DGLU6P    | XM_001662856.1 |
| DM05438P2 | 0.12853439 | -1.0480733 | 1.0055782  | 1.116847   |            |                |
| DM07227P4 | 0.12856336 | -1.1024916 | -1.0279018 | 1.0248153  |            |                |
| DM09056P3 | 0.1285663  | 1.1713631  | 1.3588715  | 1.3611426  |            |                |
| DM00019P1 | 0.1286016  | -1.0979576 | -1.1278926 | -1.1033741 | BRAFLDRAFT | XM_002611823.1 |
| DM05881P1 | 0.12867232 | -1.1575738 | 1.0171796  | 1.0953892  | LOC724531  | XM_001119886.1 |
| DM09819P1 | 0.12880312 | 1.3261045  | 1.2815394  | 1.1065059  |            |                |

|           |            |            |            |            |              |                |
|-----------|------------|------------|------------|------------|--------------|----------------|
| DM01013P1 | 0.12893811 | -1.152638  | -1.2200153 | 1.0039657  |              |                |
| DM07668P1 | 0.12897629 | -1.0932645 | 1.0310211  | -1.2259487 |              |                |
| DM03881P3 | 0.12909852 | 1.0575645  | 1.5898335  | 1.7090482  | LOC663540    | XM_969580.1    |
| DM05970P4 | 0.12922996 | -1.0964026 | 1.0584682  | -1.2136538 | UGP          | XM_001899686.1 |
| DM03431P3 | 0.12932388 | 1.081455   | -1.2348955 | -1.0392627 | DANA\GF133   | XM_001960333.1 |
| DM05186P1 | 0.12941833 | -1.0060372 | -1.1568007 | -1.0642798 |              |                |
| DM07627P2 | 0.12943786 | -1.047811  | 1.1096697  | -1.1208427 |              |                |
| DM08637P1 | 0.12951027 | 1.0273616  | -1.3010107 | 1.0022049  |              |                |
| DM00098P2 | 0.12954928 | -1.1079222 | -1.1051475 | 1.0280575  | P38MAPK      | NM_001142865.1 |
| DM15325P1 | 0.12958534 | -1.1161746 | -1.1552105 | 1.1047983  |              |                |
| DM03560P4 | 0.1296232  | 1.0903742  | 1.1191164  | 1.2635158  | DGRI\GH105   | XM_001988489.1 |
| DM08884P3 | 0.12966736 | -1.9219245 | 1.2522321  | -2.9686437 |              |                |
| DM06043P3 | 0.12973227 | 1.0243068  | -1.0558213 | -1.3015865 |              |                |
| DM01478P1 | 0.12976092 | 1.0611626  | 1.0426382  | -1.0586247 | ACYPI00762C  | NM_001162251.1 |
| DM09446P3 | 0.12978072 | 1.3214931  | 1.8370438  | -1.0030121 |              |                |
| DM08031P1 | 0.12982175 | -1.1060591 | 1.4508332  | -1.3218949 |              |                |
| DM00081P1 | 0.1298501  | 1.0543348  | 1.148743   | 1.2603736  | LIAS         | XM_536255.2    |
| DM15247P1 | 0.12992448 | -1.0885228 | -1.2707266 | -1.4314513 |              |                |
| DM00549P3 | 0.13002044 | 1.0757492  | -1.2826428 | -1.190974  | LOC1001800   | XM_002121145.1 |
| DM11195P2 | 0.13006596 | -1.0341108 | -1.0344089 | -1.8012259 |              |                |
| DM05654P2 | 0.13012534 | -1.1110785 | -1.0897775 | -1.1994647 |              |                |
| DM11988P2 | 0.13024588 | -1.0017337 | 1.1746749  | -1.2825788 |              |                |
| DM01300P2 | 0.13025787 | 1.0463252  | 1.0652174  | 1.1791902  | CPIPJ_CPIJ01 | XM_001862572.1 |
| DM11388P1 | 0.1303754  | -1.024429  | 1.1127481  | -1.1443918 |              |                |
| DM05460P2 | 0.13039318 | 1.1254439  | -1.1706934 | 1.0805593  |              |                |
| DM03974P1 | 0.13053569 | 1.073341   | 1.2243787  | -1.0300274 |              |                |
| DM06045P4 | 0.13056636 | -1.0500078 | -1.3506382 | -1.1632544 |              |                |
| DM05259P2 | 0.13057096 | 1.1354508  | 1.1310596  | 1.0754901  |              |                |
| DM08611P1 | 0.13058424 | 1.1124016  | 1.1648023  | -1.0295898 |              |                |
| DM00381P3 | 0.13069528 | 1.164186   | 1.0913368  | 1.119886   | DMOJ\GI197   | XM_002004127.1 |
| DM12545P3 | 0.1308896  | 1.3523852  | -1.2207959 | 1.5517998  |              |                |
| DM09849P1 | 0.13100663 | 1.1108595  | 1.2044961  | 1.2283627  |              |                |
| DM04495P4 | 0.13102831 | 1.4193697  | 1.1727009  | 1.5246664  |              |                |
| DM04849P2 | 0.13104421 | -1.1516558 | -1.0384111 | -1.4058208 |              |                |
| DM12131P1 | 0.13104592 | -1.0941932 | 1.1904049  | -1.0111988 |              |                |
| DM02841P2 | 0.13109423 | 1.1427892  | 1.1900775  | 1.0786237  | LOC412384    | XM_395842.3    |
| DM01097P2 | 0.13110974 | 1.0545205  | -1.1303681 | -1.0875198 | BRAFLDRAFT   | XM_002600522.1 |
| DM03014P4 | 0.1311884  | -1.0324788 | 1.0267804  | -1.2620018 |              |                |
| DM14586P3 | 0.13121559 | -1.0490305 | -1.340996  | 1.2199152  |              |                |
| DM07295P3 | 0.13123502 | -1.479624  | -4.0035844 | -1.3651975 |              |                |
| DM04143P1 | 0.13123901 | 1.1940807  | 1.2384722  | 1.2311611  |              |                |
| DM10106P1 | 0.13126497 | -1.1556929 | -1.02642   | -1.2065682 |              |                |
| DM11078P4 | 0.13140173 | 1.1467161  | 1.1363143  | -1.211259  |              |                |
| DM09478P1 | 0.13142191 | -1.1790245 | -2.0904782 | 1.0377874  |              |                |
| DM04553P1 | 0.13150698 | -1.1561407 | -1.135604  | 1.2491698  |              |                |
| DM00759P3 | 0.13155285 | -1.0015564 | -1.016359  | -1.1760712 | DANA\GF125   | XM_001958746.1 |
| DM01568P3 | 0.13158222 | -1.0734643 | -1.1594675 | -1.1049778 | TER94        | XM_392892.3    |
| DM02743P2 | 0.13158433 | -1.0229405 | -1.2756791 | 1.0391649  |              |                |
| DM10813P1 | 0.13162392 | -1.1780065 | -1.1332443 | -1.0916901 |              |                |
| DM12408P2 | 0.13168192 | -1.1199775 | 1.0620872  | 1.1366433  |              |                |

|           |            |            |            |            |             |                |
|-----------|------------|------------|------------|------------|-------------|----------------|
| DM11026P1 | 0.13192692 | -1.0137733 | -1.014827  | -1.2514005 |             |                |
| DM06878P3 | 0.13193597 | 1.2434824  | 1.3646023  | -1.0671767 |             |                |
| DM11090P3 | 0.1319603  | 1.0187799  | 1.2732791  | 1.0494688  |             |                |
| DM07790P1 | 0.13198999 | -1.3934402 | -1.3337506 | -2.1441503 |             |                |
| DM05173P1 | 0.13206449 | 1.3031608  | 1.4728335  | 1.3624282  |             |                |
| DM10375P3 | 0.13213927 | 1.0002203  | -1.0105873 | -1.1597742 |             |                |
| DM08265P1 | 0.13214588 | -1.4708933 | -1.2555189 | 2.22982    |             |                |
| DM09522P3 | 0.13214684 | 1.2029119  | -1.0183867 | -1.0748714 |             |                |
| DM05215P2 | 0.13215913 | -1.0856858 | 1.0551544  | -1.2588071 |             |                |
| DM11945P1 | 0.13217703 | 1.004408   | 1.1133782  | -1.0883262 |             |                |
| DM10560P2 | 0.13225824 | 1.1395078  | -1.0107647 | 1.4740855  |             |                |
| DM05252P2 | 0.13231117 | -1.2781537 | -1.2489073 | -1.1652491 | LOC763607   | XR_025805.1    |
| DM05244P4 | 0.13239513 | 1.076451   | -1.1705054 | 1.0855917  |             |                |
| DM09513P1 | 0.13242474 | 1.2681149  | 1.032842   | -1.045559  |             |                |
| DM06709P1 | 0.13242933 | 2.7074158  | 5.238744   | 1.9013277  | PF13_0201   | XM_001350052.1 |
| DM13248P3 | 0.13244157 | -1.0571524 | -1.1923296 | -1.2798296 |             |                |
| DM00555P3 | 0.1324745  | -1.1821399 | -1.2273465 | -1.1804578 | TRIADDRAFT  | XM_002117028.1 |
| DM02816P3 | 0.1324974  | 1.222272   | 1.1585878  | 1.0887455  | DYAK\GE119  | XM_002091855.1 |
| DM09298P1 | 0.13249858 | 1.0344794  | -1.1336011 | -1.2832949 |             |                |
| DM00687P3 | 0.13255435 | 1.1130651  | 1.1675341  | 1.1836029  |             |                |
| DM03996P2 | 0.1327002  | 1.2709974  | 1.0771164  | -1.027148  |             |                |
| DM11836P3 | 0.13272552 | 1.2377359  | -1.1326232 | -1.0085084 |             |                |
| DM11384P2 | 0.1327611  | 1.114135   | -1.0563952 | -1.0487942 |             |                |
| DM07321P4 | 0.13276301 | -1.2474147 | -1.0700616 | -1.0204811 |             |                |
| DM05284P3 | 0.13278984 | 1.2835628  | 1.4353305  | 1.3162745  |             |                |
| DM12379P1 | 0.13282521 | 1.0592227  | 1.3599926  | 1.8347048  |             |                |
| DM13747P3 | 0.13286178 | -1.0177578 | -1.0997235 | -1.2576437 | NUDT6       | NM_153561.2    |
| DM01181P2 | 0.13292457 | -1.0923797 | -1.0664686 | -1.1602534 | AGAP_AGAP0  | XM_001687808.1 |
| DM06998P2 | 0.13296796 | 1.009902   | -1.1321316 | 1.4106649  |             |                |
| DM06653P1 | 0.13303539 | 2.111762   | 3.5296364  | -1.0874513 |             |                |
| DM06356P1 | 0.13312379 | -1.0686076 | -1.0932378 | -1.2039459 | DSIM\GD217  | XM_002079858.1 |
| DM05671P3 | 0.13312988 | 1.0071654  | -1.2115333 | -1.1926365 | DVIR\GJ2223 | XM_002050551.1 |
| DM05487P1 | 0.13313861 | -1.0439665 | -1.0626556 | -1.1843897 |             |                |
| DM04508P3 | 0.13316597 | -1.0683768 | -1.0957751 | -1.2133666 |             |                |
| DM10436P1 | 0.13325752 | 1.0343709  | -1.0835308 | 1.2033192  |             |                |
| DM08708P2 | 0.1332734  | 1.2430938  | 1.0577543  | -1.0270294 |             |                |
| DM08504P1 | 0.13328308 | -1.1221772 | -1.0675449 | 1.2080061  |             |                |
| DM02522P2 | 0.1332849  | -1.1647676 | -1.0492729 | 1.2052039  | DPSE\GA288  | XM_002134015.1 |
| DM00573P1 | 0.13329609 | 1.0274388  | 1.0090679  | 1.1245242  | DANA\GF205  | XM_001965788.1 |
| DM08667P4 | 0.13329957 | 1.0950507  | -1.0985445 | -1.0859542 |             |                |
| DM09525P1 | 0.1333103  | -1.0123796 | -1.1005532 | -1.2321471 |             |                |
| DM08898P2 | 0.13335499 | -1.0483519 | 1.225896   | -1.0471945 |             |                |
| DM06250P1 | 0.13338247 | 1.4018253  | 1.5403136  | 1.3968055  |             |                |
| DM03613P3 | 0.13339399 | -1.0245783 | -1.0649426 | -1.0030539 |             |                |
| DM04180P2 | 0.13343973 | -1.1303179 | 1.0303698  | -1.0232435 |             |                |
| DM09343P1 | 0.13344824 | 1.0679965  | -1.0318056 | -1.3175095 |             |                |
| DM06874P4 | 0.13345642 | 1.3826095  | 1.5147134  | 1.1537807  |             |                |
| DM04712P1 | 0.1334611  | -1.2255484 | 1.2554233  | -1.974273  |             |                |
| DM00959P1 | 0.13346587 | 1.0411668  | -1.1117262 | -1.0519712 | TXNRD1      | NM_001122669.1 |
| DM06791P3 | 0.1334704  | 1.0392156  | 1.0289882  | 1.3818167  |             |                |



|           |            |            |            |            |                             |
|-----------|------------|------------|------------|------------|-----------------------------|
| DM02835P1 | 0.13350116 | 1.1774068  | -4.9776917 | -1.0542047 | DVIR\GJ2271 XM_002052211.1  |
| DM00365P4 | 0.13361667 | 1.1835849  | -1.1835256 | 1.0997179  | LOC1002094! XM_002158275.1  |
| DM09431P1 | 0.13365637 | -1.0019872 | 1.1470451  | -1.1001388 |                             |
| DM09413P2 | 0.13366202 | 1.1155062  | 1.0116503  | -1.2030351 |                             |
| DM12311P1 | 0.13374643 | 1.0279037  | -1.0595771 | 1.2469391  |                             |
| DM02141P4 | 0.13388593 | -1.2214478 | -1.1647393 | -1.0511479 | LOC1001590 XM_001951824.1   |
| DM09441P1 | 0.13393134 | -1.2146084 | -1.0812562 | -1.2182971 |                             |
| DM12229P2 | 0.13396242 | 1.4275098  | 1.2837262  | 1.8716031  |                             |
| DM00468P2 | 0.13403273 | 1.0049831  | -1.1364396 | -1.1157111 | TRIADDRAFT XM_002108111.1   |
| DM00055P3 | 0.1340474  | -1.0359052 | -1.0173903 | -1.1706889 | LOC656519 XM_963045.2       |
| DM09663P3 | 0.13406853 | 1.0338404  | 1.0788692  | -1.2250513 |                             |
| DM02579P4 | 0.13409556 | -1.0850487 | -1.485852  | -1.0277334 | DESAT1 NM_169467.1          |
| DM05764P2 | 0.13410825 | -1.4575793 | -1.4988714 | -1.6358318 | DGRIV\GH221! XM_001994312.1 |
| DM08999P1 | 0.13414542 | -1.1112759 | -1.1108025 | -1.2394034 |                             |
| DM04817P3 | 0.13416664 | 1.4461691  | -1.2931014 | 1.2191972  |                             |
| DM00761P3 | 0.13417056 | 1.0090522  | -1.2511274 | -1.2087847 |                             |
| DM13361P3 | 0.13420367 | 1.0432262  | 1.2318605  | 1.0961137  |                             |
| DM06112P1 | 0.13423832 | -1.1613486 | 1.0913982  | -1.1926863 | CELE_ZK550. NM_070661.2     |
| DM00077P2 | 0.13426714 | -1.2740186 | -1.2828269 | -1.3397768 |                             |
| DM06843P3 | 0.134339   | -1.0270289 | -1.0274038 | 1.1522663  |                             |
| DM14826P2 | 0.1343442  | -1.0313413 | 1.1381605  | 1.4305925  |                             |
| DM10114P3 | 0.13435283 | -1.3240842 | -1.2396544 | -1.156269  |                             |
| DM08384P3 | 0.13440643 | 1.269051   | 1.3041606  | -1.2294551 |                             |
| DM08385P1 | 0.13454409 | 1.0360881  | -1.0819674 | -1.1482168 |                             |
| DM02898P3 | 0.13454577 | -1.0618279 | -1.3673472 | 1.072253   | AGAP_AGAP0 XM_309822.4      |
| DM12686P2 | 0.13471197 | 1.0680329  | 1.0145302  | -1.209486  |                             |
| DM04045P2 | 0.13474382 | -1.050415  | 1.1442827  | -1.0838728 | FKBP59 XM_395748.3          |
| DM00543P1 | 0.13478099 | -1.0645893 | 1.00364    | -1.2577726 | AGAP_AGAP0 XM_308462.4      |
| DM00546P3 | 0.13479644 | -1.0952957 | 1.0354352  | 1.0389795  | CPIPJ_CPIJ01 XM_001863291.1 |
| DM09567P3 | 0.13479677 | 1.1801825  | 1.072305   | -1.1777765 |                             |
| DM11947P3 | 0.13484378 | 1.0657253  | 1.0763445  | -1.1365861 |                             |
| DM12705P2 | 0.13493668 | 1.0817637  | 1.0827091  | -1.0799903 |                             |
| DM10514P3 | 0.13504252 | -1.0488691 | -1.0730938 | -1.1269543 |                             |
| DM01873P2 | 0.135151   | -1.0055902 | 1.0237621  | -1.1225533 |                             |
| DM14795P1 | 0.13516209 | -1.2262391 | -1.0637012 | 1.1889277  |                             |
| DM06444P1 | 0.13527563 | -1.0298463 | 1.0095896  | 1.2763029  | DANA\GF210 XM_001963856.1   |
| DM10350P3 | 0.1352929  | -1.0467523 | -1.188872  | 1.038415   |                             |
| DM09203P2 | 0.13530101 | -1.0466983 | -1.0070713 | 1.2003139  |                             |
| DM12850P1 | 0.13537157 | -1.1531597 | -1.1180553 | -1.2848616 |                             |
| DM01889P4 | 0.13542004 | 1.2887805  | 1.0876473  | -1.0856229 | PAPSS2 XM_543589.2          |
| DM15008P2 | 0.13553463 | 1.1526974  | 2.1316195  | -1.1611841 |                             |
| DM11546P1 | 0.13557301 | 1.1566734  | -1.7688156 | -1.0775754 |                             |
| DM05205P2 | 0.13560794 | 1.1757125  | 1.1652715  | 1.1173031  |                             |
| DM10784P3 | 0.13565077 | 1.058997   | -1.1396824 | -1.1062398 |                             |
| DM09740P1 | 0.1357934  | 1.0191796  | 1.4197947  | -1.1622078 |                             |
| DM05135P1 | 0.13582104 | 1.0309421  | 1.0572757  | -1.1229185 |                             |
| DM03040P4 | 0.13586046 | -1.2738212 | -1.055141  | 1.1379197  | ALAS1 NM_201287.1           |
| DM02785P2 | 0.13589408 | -1.0470905 | -1.0105025 | 1.3735508  |                             |
| DM09318P2 | 0.13589963 | 1.0493866  | 1.236788   | 1.1372449  |                             |
| DM01428P2 | 0.13594946 | -1.1559485 | -1.0371953 | -1.1444546 | LOC1001670 XM_001948875.1   |

|           |            |            |            |            |             |                |
|-----------|------------|------------|------------|------------|-------------|----------------|
| DM02599P2 | 0.13604458 | 1.1493522  | -1.0449358 | 1.1884152  | LOC1001748  | NM_001130902.1 |
| DM08439P3 | 0.1360587  | -1.242221  | -1.4085468 | -1.4609472 |             |                |
| DM05005P2 | 0.13609147 | 1.3710594  | -1.0639522 | 1.0203406  |             |                |
| DM14842P3 | 0.13616438 | 1.1137931  | 1.2093971  | 1.6284513  |             |                |
| DM04228P1 | 0.13622035 | -1.0552034 | -1.0757065 | -1.2485596 |             |                |
| DM12113P3 | 0.136271   | -1.7763659 | -1.42408   | -1.6546192 |             |                |
| DM08086P3 | 0.13630398 | -1.7369981 | -1.5934705 | -1.181349  |             |                |
| DM00598P3 | 0.13642962 | -1.0034772 | -1.483591  | 1.0362464  |             |                |
| DM06400P3 | 0.13644409 | -1.0637555 | 1.1549349  | -1.0816193 |             |                |
| DM14578P1 | 0.13644668 | 1.5328044  | 2.3409028  | 1.1678575  |             |                |
| DM01384P2 | 0.13645098 | -1.2205719 | -1.234825  | 1.3178576  | LOC1001808  | XM_002122993.1 |
| DM09283P1 | 0.13658555 | -1.3914143 | 1.0136088  | 1.2165173  | MSDH        | XM_001652336.1 |
| DM15004P1 | 0.13661939 | -1.060876  | -1.0170717 | 1.0902832  |             |                |
| DM02303P2 | 0.13662028 | -1.1976202 | -1.2171036 | -1.2305472 | LOC1001204  | XM_001607794.1 |
| DM11768P1 | 0.13662392 | 1.1393809  | 1.0584316  | -1.3365463 |             |                |
| DM14930P3 | 0.13678546 | -1.1128387 | 1.0150039  | 1.2078342  |             |                |
| DM14726P2 | 0.13681893 | -1.2594291 | 1.0979002  | 1.1919645  |             |                |
| DM00264P2 | 0.13684723 | 1.0081415  | -1.07383   | -1.1482598 | LOC586477   | XM_001177867.1 |
| DM01989P3 | 0.13696484 | -1.0290587 | 1.0449157  | 1.1729307  | RPS25       | XM_001654636.1 |
| DM11324P1 | 0.13702099 | -1.2493194 | -1.2120943 | -1.043268  |             |                |
| DM04632P1 | 0.1370318  | 1.1079088  | -1.0302879 | -1.1017883 |             |                |
| DM01998P1 | 0.13703479 | 1.051395   | -1.6031619 | 1.042199   |             |                |
| DM00731P1 | 0.13710819 | -1.0286117 | -1.0429147 | -1.1854429 | DPER\GL128  | XM_002022535.1 |
| DM06686P1 | 0.13712573 | 1.0079323  | 1.0978781  | 1.5772424  |             |                |
| DM01153P3 | 0.13713409 | -1.2300472 | -1.0452526 | -1.3010579 | LOC1001590  | XM_001945442.1 |
| DM09243P4 | 0.13716504 | -1.1708103 | -1.0069262 | -1.0267435 |             |                |
| DM12560P2 | 0.1371946  | 1.204647   | 1.1141585  | -1.0298649 |             |                |
| DM07834P1 | 0.13725108 | 1.0789484  | -3.5074422 | 1.2566861  |             |                |
| DM01970P1 | 0.13731644 | 1.0167581  | -1.0166532 | 1.0247637  | LOC448984   | NR_002170.3    |
| DM12913P2 | 0.13733856 | -1.117478  | -1.0559736 | -1.2770619 |             |                |
| DM07725P4 | 0.13737036 | 1.1362704  | -1.0916907 | 1.6647825  |             |                |
| DM00378P3 | 0.13749956 | 1.1237442  | -1.0521221 | -1.1138278 | AATS-GLUPR  | XR_014915.1    |
| DM08804P3 | 0.13755402 | 1.0848484  | -1.1928163 | -1.3437381 |             |                |
| DM08538P1 | 0.1376269  | -1.0728916 | 1.0703132  | 1.009825   |             |                |
| DM07270P3 | 0.13766414 | 1.1938297  | -1.1728733 | -1.1643691 |             |                |
| DM12288P1 | 0.13767    | 1.0283283  | -1.5902234 | -1.1104884 |             |                |
| DM11848P1 | 0.13768858 | 1.0142752  | -1.3321402 | -1.1010065 |             |                |
| DM14944P2 | 0.13781117 | 1.2322608  | 1.3440335  | 1.1910473  |             |                |
| DM01943P2 | 0.13788433 | 1.0071774  | 1.0237164  | -1.0911111 | DVIR\GJ1459 | XM_002051116.1 |
| DM01569P1 | 0.13794969 | -1.1836224 | -1.0301518 | 1.1125021  | NEMVEDRAFT  | XM_001641809.1 |
| DM08288P1 | 0.13816428 | -1.0210712 | 1.007208   | 1.0508251  |             |                |
| DM09182P1 | 0.13821054 | 1.0853863  | 1.0569078  | -1.0853837 |             |                |
| DM15329P3 | 0.13826032 | -1.1016531 | -1.3581481 | -1.1519758 |             |                |
| DM15061P1 | 0.13841443 | -1.214297  | 1.1264607  | 1.4035715  |             |                |
| DM09504P1 | 0.13843217 | 1.0510474  | 1.1546856  | 1.3815145  |             |                |
| DM10924P1 | 0.13845755 | -1.1336159 | -1.2246288 | -1.1365135 |             |                |
| DM10326P4 | 0.1384835  | -1.0300262 | -1.3641634 | 1.0905579  |             |                |
| DM12861P2 | 0.13850617 | 1.0994365  | -1.1037213 | -1.1555414 |             |                |
| DM10495P1 | 0.1385165  | 1.234071   | 1.0950115  | -1.0920249 |             |                |
| DM15280P2 | 0.13870624 | -1.1762381 | -1.1104109 | 1.0431805  |             |                |

|           |            |            |            |            |            |                |
|-----------|------------|------------|------------|------------|------------|----------------|
| DM11782P1 | 0.13903992 | 1.0539463  | -1.0460275 | 1.2637727  |            |                |
| DM01838P2 | 0.13908765 | -1.03214   | 1.1067212  | -1.0585111 | SNAP       | XM_625205.2    |
| DM09660P2 | 0.13918379 | 1.2180203  | 1.3821336  | 1.1664903  |            |                |
| DM08118P4 | 0.13924183 | -1.0812886 | -1.126101  | 1.3005447  |            |                |
| DM07177P1 | 0.13924372 | 1.0991389  | 1.2241096  | 1.2677583  |            |                |
| DM13665P2 | 0.1392924  | -1.071277  | 1.218952   | 1.1444442  |            |                |
| DM12444P2 | 0.13934489 | 1.02384    | 1.130506   | 1.440806   |            |                |
| DM05551P1 | 0.1393904  | 1.091113   | 1.1698318  | -1.0769591 |            |                |
| DM11249P1 | 0.13939238 | 1.8446515  | -1.0026015 | 2.850872   |            |                |
| DM07804P1 | 0.13942677 | 1.04436    | 1.2226143  | 1.3276852  |            |                |
| DM06597P2 | 0.13954444 | 1.160391   | 1.8162184  | -2.1758637 |            |                |
| DM01041P2 | 0.13959058 | 1.315701   | -1.477474  | 1.4292421  | LOC413054  | XM_396505.2    |
| DM04888P3 | 0.13960482 | -1.0318388 | 1.0057716  | -1.3618071 |            |                |
| DM00267P1 | 0.13961983 | 1.0014297  | 1.0450273  | -1.1480163 | RHBDD1     | XM_001865677.1 |
| DM10221P3 | 0.13962016 | -1.512543  | -1.1105471 | 1.0292598  |            |                |
| DM08592P2 | 0.13966548 | -1.2283639 | -1.1822628 | -1.2651529 |            |                |
| DM14789P2 | 0.13966574 | -1.0228378 | 1.3218704  | 1.2274183  |            |                |
| DM15237P2 | 0.13968576 | -1.1648686 | -1.1232404 | 1.045203   |            |                |
| DM06632P1 | 0.13985765 | 1.0308349  | -1.0576357 | -1.1391075 | ETFB       | XM_001845381.1 |
| DM10778P4 | 0.14000443 | -1.2512028 | 1.0137806  | -1.2396721 |            |                |
| DM03231P3 | 0.14006068 | 1.0962218  | 1.0093411  | -1.1421858 |            |                |
| DM04735P3 | 0.14012645 | 1.156293   | 1.2770039  | 1.4285719  |            |                |
| DM02732P2 | 0.14013852 | 1.0978445  | 1.2302322  | -1.0089376 | NFYA       | NM_001082795.1 |
| DM05073P4 | 0.14019945 | -1.0503625 | 1.2123071  | 1.1142938  | SAP30L     | NM_214703.1    |
| DM14376P3 | 0.14020085 | 1.1816705  | 1.0400774  | -1.0562439 |            |                |
| DM00256P1 | 0.14023946 | 1.2028927  | -1.2559565 | -1.0727831 |            |                |
| DM11162P1 | 0.1403749  | 1.0278342  | 1.168093   | 1.2295322  |            |                |
| DM11503P1 | 0.14037697 | 1.2988845  | 1.5528902  | -1.168482  |            |                |
| DM11501P2 | 0.14037804 | 1.0243561  | -1.113049  | 1.1991677  |            |                |
| DM10741P2 | 0.1403908  | -1.0181282 | -1.2573472 | -1.0480419 |            |                |
| DM11398P2 | 0.14039816 | 1.1862918  | 1.059623   | 1.0123448  |            |                |
| DM10081P1 | 0.14043649 | 1.0420612  | -1.0279597 | -1.189752  |            |                |
| DM00534P1 | 0.14043981 | -1.187253  | -1.2109157 | -1.250232  | LOC551725  | XM_624113.2    |
| DM04039P1 | 0.14047706 | -1.0636176 | -1.1445446 | -1.3341175 | PK         | XM_001662663.1 |
| DM07731P1 | 0.1406751  | -1.053318  | -1.299604  | -1.0360826 |            |                |
| DM09161P2 | 0.14076632 | -1.2811115 | -1.0599422 | -1.1120919 |            |                |
| DM08124P1 | 0.14086598 | 1.0109135  | 1.1268376  | 1.1229703  |            |                |
| DM12295P3 | 0.14096726 | 1.1285207  | -1.5291141 | 2.2147858  | NB001      | XM_002158539.1 |
| DM05282P3 | 0.1410186  | -1.3065897 | -1.3850374 | 1.9111176  |            |                |
| DM08380P2 | 0.14111124 | -1.6729287 | -1.8600558 | -1.5521506 |            |                |
| DM05390P2 | 0.14154215 | 1.4314581  | 1.2381824  | 1.1541244  |            |                |
| DM05790P2 | 0.14158198 | -1.1429752 | -2.0880814 | -1.2093565 |            |                |
| DM08893P3 | 0.14168176 | 1.2181295  | 1.936725   | -1.4554049 |            |                |
| DM08468P1 | 0.14175858 | -1.1364079 | 1.012334   | 1.1053969  |            |                |
| DM06798P1 | 0.14181782 | 1.2754371  | 1.3657728  | 1.2999436  |            |                |
| DM07334P2 | 0.14185955 | 1.0010657  | 1.1769656  | 1.0416914  |            |                |
| DM04302P2 | 0.14187141 | 1.1406653  | 1.120559   | -1.1340237 | LOC594000  | XM_793453.2    |
| DM14433P1 | 0.14193101 | -2.1195714 | -1.2018403 | -2.2308567 |            |                |
| DM11173P1 | 0.14199282 | -1.0123246 | 1.6403502  | 1.521858   |            |                |
| DM05879P4 | 0.14212728 | 1.1343907  | 1.0717747  | 1.2412728  | DANA\GF210 | XM_001963856.1 |

|           |            |            |            |            |                            |
|-----------|------------|------------|------------|------------|----------------------------|
| DM09282P2 | 0.14218013 | 1.2188344  | 1.0137345  | -1.2032237 |                            |
| DM14390P2 | 0.14220053 | 1.1678714  | 1.4930327  | 1.4067627  |                            |
| DM08294P1 | 0.14222202 | 1.0332983  | 1.1949705  | 1.139835   |                            |
| DM04694P2 | 0.1422636  | -1.0139254 | 1.1414597  | -1.088303  |                            |
| DM09299P1 | 0.14244474 | 1.1239539  | -1.0147043 | -1.0956687 |                            |
| DM09704P3 | 0.1424738  | -1.1403922 | -1.115947  | 1.0219831  |                            |
| DM11142P2 | 0.14253546 | -1.1741674 | -1.2261206 | -1.1948735 |                            |
| DM09012P2 | 0.1425409  | -1.2737323 | -1.2656159 | -1.0454996 |                            |
| DM14389P1 | 0.14256856 | -1.1209375 | 1.0470434  | -1.0917068 |                            |
| DM09438P1 | 0.14262556 | 1.0164838  | -1.0326804 | -1.3166867 |                            |
| DM02285P3 | 0.14265315 | 1.0209095  | -1.4226109 | 1.3256081  | DPER\GL2247 XM_002024668.1 |
| DM04077P2 | 0.1426794  | 1.4497321  | 1.5798001  | 1.6306337  |                            |
| DM10788P2 | 0.1427152  | -1.2960794 | -1.1060772 | -1.042258  |                            |
| DM00463P1 | 0.14273366 | -1.2283783 | -1.1727017 | 1.0022099  | DERE\GG100 XM_001969385.1  |
| DM01315P3 | 0.14277469 | 1.0685949  | 1.0705401  | -1.2138134 | SLC39A6 NM_001144092.1     |
| DM08522P1 | 0.14279255 | 1.003158   | -1.6293739 | 1.4780464  |                            |
| DM14016P1 | 0.14291923 | -1.2999063 | -1.1151768 | -1.0110649 |                            |
| DM04065P2 | 0.14295131 | 1.3533989  | 1.5170554  | 1.697875   |                            |
| DM09606P1 | 0.14302187 | 1.1256709  | 1.7382568  | 1.059757   |                            |
| DM01610P2 | 0.14309616 | -1.346023  | -1.2531213 | -1.123669  | DWIL\GK127 XM_002074169.1  |
| DM01603P4 | 0.14312163 | -1.0262803 | -1.1844716 | -1.1979294 | RPS16 XM_416113.2          |
| DM10270P4 | 0.14313231 | -1.1740811 | 1.5521072  | 1.3514122  |                            |
| DM02788P2 | 0.14314577 | 1.1191646  | 1.1778404  | 1.3393936  |                            |
| DM12016P3 | 0.14318226 | 1.1076987  | 1.2226379  | -1.019512  |                            |
| DM01997P1 | 0.1432059  | -1.029497  | -1.1775982 | 1.0801756  | AAEL_AAEL0C XM_001652036.1 |
| DM02073P2 | 0.1432154  | -1.5043185 | -1.2949516 | -1.1208277 |                            |
| DM01332P1 | 0.1433438  | -1.160148  | -1.2373879 | -1.0109509 | NDUFA2 XM_001140839.1      |
| DM06870P2 | 0.14335516 | 1.359107   | -1.9487259 | 1.6883658  |                            |
| DM12653P1 | 0.1433598  | 1.1671281  | 1.2692968  | 1.1533674  |                            |
| DM01508P1 | 0.14342546 | -1.0314199 | 1.0413992  | -1.1814528 | ORC1L NM_001088337.1       |
| DM00715P1 | 0.14354905 | -1.0829773 | 1.1730008  | 1.1514015  | DSIM\GD161 XM_002106308.1  |
| DM09788P2 | 0.14366995 | 1.074106   | 1.3002744  | -1.0503585 |                            |
| DM08836P1 | 0.14376484 | 1.1823509  | -1.1711719 | -1.1402382 |                            |
| DM00404P3 | 0.14381133 | -1.0202006 | -1.2017407 | 1.0058542  | ISCW_ISCWC XM_002411339.1  |
| DM08632P2 | 0.14382586 | -1.1515136 | -1.2736335 | -1.0565149 |                            |
| DM04213P2 | 0.14385742 | -1.0384353 | 1.0604078  | -1.1053393 |                            |
| DM03429P2 | 0.14388646 | -1.2372812 | -1.2641716 | -1.1414713 | ADAM10 XM_393114.3         |
| DM01359P3 | 0.14409631 | -1.1931005 | -1.0419387 | -1.0117146 | DANA\GF104 XM_001957527.1  |
| DM13582P3 | 0.14410096 | -1.1178646 | 1.0290322  | 1.2255644  |                            |
| DM14102P1 | 0.14413106 | -1.1890703 | -1.025484  | -1.0275729 |                            |
| DM09506P4 | 0.14414299 | -1.0114156 | 1.0532309  | -1.360108  |                            |
| DM02221P1 | 0.14415    | -1.197532  | -1.3216673 | 1.0149685  | DMOJ\GI236C XM_001998462.1 |
| DM01279P2 | 0.14415373 | -1.0267903 | -1.2700553 | 1.0632542  | VINC XR_014976.1           |
| DM07661P2 | 0.14421546 | 1.4956686  | 1.5072792  | 1.3754205  |                            |
| DM02227P1 | 0.14427333 | -1.2760854 | -1.2239755 | -1.4643201 | LOC10008237 XM_001513737.1 |
| DM04971P3 | 0.14427409 | -1.074141  | -1.2683386 | -1.5230367 |                            |
| DM11981P2 | 0.14428568 | 1.5204594  | 1.9239178  | 1.637215   |                            |
| DM10688P4 | 0.14431284 | -1.0280758 | -1.1087058 | 1.2028211  |                            |
| DM04881P2 | 0.14446042 | 1.4778149  | -1.0437379 | 1.2571623  |                            |
| DM11404P3 | 0.14453617 | 1.1103904  | -1.1100271 | -1.2523112 |                            |

|           |            |            |            |            |                             |
|-----------|------------|------------|------------|------------|-----------------------------|
| DM08495P1 | 0.14453693 | -1.1555275 | 1.352827   | -1.875615  |                             |
| DM08256P1 | 0.14458244 | 1.1771734  | -1.0437188 | 1.1441144  |                             |
| DM05160P2 | 0.14460838 | -1.1948442 | -1.0007309 | 1.4909588  |                             |
| DM01027P1 | 0.14463441 | -1.0238479 | -1.0536398 | -1.177413  | CPIPJ_CPIJ01 XM_001863292.1 |
| DM11849P4 | 0.14464195 | 1.4761705  | 1.772549   | 1.2921286  |                             |
| DM06410P4 | 0.14466383 | 1.0332845  | 1.3781163  | -1.1201091 |                             |
| DM00699P3 | 0.14467248 | 1.1297108  | -1.0595192 | 1.2055187  | ISCW_ISCWC XM_002415761.1   |
| DM08939P1 | 0.14486729 | 1.5670557  | -1.435567  | 2.5924792  |                             |
| DM09996P4 | 0.1449545  | 1.0049855  | -1.1845281 | -1.3899469 |                             |
| DM06822P2 | 0.14497913 | 1.6787741  | 2.4808118  | -1.2461045 |                             |
| DM09864P2 | 0.14499545 | 1.4479188  | 1.7772626  | 1.0975969  |                             |
| DM07777P4 | 0.14503427 | -1.117257  | -1.0265999 | -1.0317051 |                             |
| DM02660P2 | 0.14505228 | 1.0033144  | -1.2184309 | -1.1081685 | LOC496320 NM_001095475.1    |
| DM04920P1 | 0.14505297 | 1.1264368  | 1.0788685  | -1.1508188 |                             |
| DM10700P2 | 0.14505357 | 1.0210365  | 1.1979613  | 1.286636   |                             |
| DM08992P1 | 0.14507431 | -1.0688435 | 1.1903706  | -1.0352858 |                             |
| DM03289P1 | 0.14513686 | -1.0517869 | 1.0377924  | -1.1469431 |                             |
| DM10066P3 | 0.1451554  | 1.3309495  | -1.4198886 | -1.0053838 |                             |
| DM06097P4 | 0.14516978 | 1.0800732  | 1.1083531  | -1.1679807 |                             |
| DM04167P4 | 0.14518015 | 1.1149685  | -1.2672628 | 1.0423509  | LOC1002177'XR_053953.1      |
| DM10757P3 | 0.14524259 | 1.1925123  | -1.3302547 | 1.1747792  |                             |
| DM04720P1 | 0.14525406 | -1.1094491 | -1.116947  | 1.0392368  |                             |
| DM01547P3 | 0.14531244 | -1.1185586 | -1.1546166 | 1.0061374  | DPSE\GA209! XM_001361784.2  |
| DM09950P1 | 0.14535415 | -1.1540207 | 1.0474026  | -1.1777282 |                             |
| DM02605P2 | 0.14545088 | -1.0612768 | -1.0643474 | 1.0641974  | LOC1000250! XM_001365301.1  |
| DM15079P1 | 0.1454611  | -1.0041788 | -1.1402521 | 1.0309905  | LOC1000303! XM_001379856.1  |
| DM02388P1 | 0.14547107 | -1.1562419 | -1.0027312 | -1.1361148 | RNF31 XM_396907.3           |
| DM10342P3 | 0.14547157 | -1.0243561 | 1.1286286  | 1.1635036  |                             |
| DM14861P1 | 0.1455129  | 1.1652018  | -1.1138366 | -1.197302  |                             |
| DM00612P2 | 0.14552507 | -1.1233549 | -1.0959892 | -1.2746305 | DMOJ\GI106! XM_002001089.1  |
| DM08556P4 | 0.14560851 | -1.1376988 | -1.123794  | -1.1670539 |                             |
| DM00369P3 | 0.14561763 | -1.1604271 | -1.0734371 | -1.3086454 | DBP80 XM_001845264.1        |
| DM07715P1 | 0.14563298 | -1.0063182 | 1.0427225  | -1.1349629 |                             |
| DM02610P3 | 0.14564884 | 1.1795958  | 1.1912241  | 1.2924434  |                             |
| DM09180P1 | 0.14565736 | -1.1863672 | -1.0744976 | -1.3120497 |                             |
| DM00384P1 | 0.1457523  | 1.02862    | 1.0719734  | -1.1433126 | LOC1002611! XM_002283997.1  |
| DM07095P3 | 0.14575937 | 1.2014458  | 1.7775302  | -1.1066632 |                             |
| DM06642P1 | 0.1457615  | 1.3103596  | 1.5827161  | 1.50014    |                             |
| DM04304P2 | 0.1458016  | -1.1172003 | -1.0906979 | -1.0465531 | ATKRS-1 NM_112003.3         |
| DM12884P1 | 0.14588048 | 1.0534714  | -1.1512032 | -1.1580777 |                             |
| DM12328P3 | 0.14590678 | -1.0677326 | 1.1291895  | 1.005388   |                             |
| DM09862P2 | 0.14592804 | 1.0608106  | -1.0979584 | 1.2583578  |                             |
| DM13317P1 | 0.14598979 | 1.2180104  | -1.1194702 | -1.0764922 |                             |
| DM06133P3 | 0.14604627 | -1.0661463 | 1.168926   | 1.2738289  |                             |
| DM04980P3 | 0.14605549 | 1.1103851  | -1.1242942 | 1.0606558  |                             |
| DM10139P1 | 0.1460801  | -1.2452251 | 1.0350227  | 1.19062    |                             |
| DM08283P1 | 0.14622785 | -1.3882787 | -1.238395  | -1.0222433 |                             |
| DM05387P1 | 0.14628996 | -1.0764167 | -1.050151  | 1.064658   |                             |
| DM13588P3 | 0.14641587 | -1.1443368 | -1.0540308 | 1.1862464  | AGAP_AGAP0 XM_557898.3      |
| DM11258P1 | 0.14644945 | -1.1232632 | -1.1860594 | -1.1378946 |                             |

|           |            |            |            |            |              |                |
|-----------|------------|------------|------------|------------|--------------|----------------|
| DM11932P1 | 0.14647669 | 1.2618743  | 1.1004443  | -1.1504167 |              |                |
| DM06650P2 | 0.14648293 | -1.0853873 | -1.1345773 | 1.2385484  |              |                |
| DM02064P3 | 0.14651524 | 1.2210975  | 1.0648904  | 1.4372034  | RHO          | XM_001863451.1 |
| DM03522P3 | 0.14658198 | -1.5082067 | -1.6472477 | -1.5604056 |              |                |
| DM05832P2 | 0.14662364 | 1.1485627  | 1.1252631  | 1.0120307  | DWIL\GK239   | XM_002064525.1 |
| DM01924P1 | 0.14664018 | -1.0308034 | -1.1823655 | 1.0024457  | LOC579469    | XM_001198137.1 |
| DM05710P1 | 0.14670913 | 1.1067637  | 1.3032871  | 1.1633096  |              |                |
| DM00415P3 | 0.14677492 | -1.2338753 | -1.1221914 | -1.2104733 | DRG2         | XM_001662307.1 |
| DM09262P3 | 0.14678101 | 1.0504397  | 1.1156199  | -1.0987496 |              |                |
| DM04820P1 | 0.14707683 | 1.0994084  | 1.3013531  | 1.1027502  |              |                |
| DM03424P3 | 0.14716235 | -1.0594143 | 1.0783497  | -1.0711308 | NCBP2        | XM_001557095.1 |
| DM06173P1 | 0.14724284 | -1.0715591 | -1.2692082 | 1.0100209  |              |                |
| DM14350P2 | 0.14735505 | 1.2570238  | -1.0508611 | 1.3859094  | LOC1001144   | XM_001599417.1 |
| DM10005P2 | 0.14739111 | -1.0506117 | 1.1735535  | -1.0959727 | KPOL_1045P   | XM_001645882.1 |
| DM11283P1 | 0.14742133 | 1.0764153  | -1.1441169 | -1.6496915 |              |                |
| DM04356P2 | 0.14744785 | 1.1557833  | 1.2054497  | 1.4170488  |              |                |
| DM14661P1 | 0.14751571 | 1.0158243  | 1.2324122  | 1.3839569  |              |                |
| DM01031P1 | 0.14766161 | -1.3071643 | -1.2557776 | -1.0036632 | TRIADDRAFT   | XM_002118562.1 |
| DM03377P2 | 0.14766628 | -1.2137028 | -1.4016211 | -1.1011841 |              |                |
| DM04866P3 | 0.1476937  | 1.1574566  | 1.121774   | 1.126664   |              |                |
| DM01294P1 | 0.14772706 | -1.2266617 | -1.0657996 | -1.1549441 | BRAFLDRAFT   | XM_002610139.1 |
| DM10796P3 | 0.1477519  | 1.3035752  | -1.1424854 | 1.158852   |              |                |
| DM10149P4 | 0.1477984  | 1.1390718  | -1.1537547 | -1.4417179 |              |                |
| DM07138P2 | 0.14784516 | 2.2199883  | 4.334975   | 1.5063903  |              |                |
| DM03340P2 | 0.14785224 | -1.0139412 | 1.043684   | -1.1852618 |              |                |
| DM01086P2 | 0.14792061 | 1.0878878  | -1.2097719 | -1.1604309 | HMGCR        | NM_204485.1    |
| DM10683P3 | 0.14798123 | 1.2068648  | 1.0341036  | 1.0110925  |              |                |
| DM08752P1 | 0.1480829  | -1.1703769 | -1.1299851 | 1.250217   |              |                |
| DM03000P1 | 0.14813182 | -1.4053012 | 1.0136542  | -1.0288173 | TRIADDRAFT   | XM_002110788.1 |
| DM07818P1 | 0.14822778 | -1.1750399 | -1.4319682 | 1.2016487  |              |                |
| DM00036P3 | 0.14842065 | -1.2098027 | -1.1808423 | -1.1670206 | LOC1001181   | XM_001607804.1 |
| DM13319P2 | 0.14842731 | 1.0482643  | 1.6082817  | 1.1895243  |              |                |
| DM00908P3 | 0.14844333 | -1.0273235 | 1.2278736  | 1.091402   | LOC1001210   | XM_001604542.1 |
| DM14898P3 | 0.14853132 | 1.2548847  | 1.600425   | 1.6784097  |              |                |
| DM02632P3 | 0.14860426 | 1.1186614  | -1.0551369 | 1.1374243  | MLC-C        | XM_623501.2    |
| DM09390P2 | 0.14863051 | -1.050507  | -1.2049129 | -1.0995662 |              |                |
| DM09242P2 | 0.14868669 | -1.0177828 | 1.0368696  | -1.0722038 |              |                |
| DM04376P1 | 0.14873412 | -1.0157362 | -1.4819973 | 1.0463123  | LOC584915    | XM_795219.2    |
| DM11671P1 | 0.14873932 | 1.091871   | 1.0086153  | -1.2727672 |              |                |
| DM14924P1 | 0.14874929 | 1.1176356  | 1.2496958  | -1.0396641 | DVIR\GJ1027  | XM_002056321.1 |
| DM13640P1 | 0.14880575 | -1.1527919 | -1.1008652 | -1.1668106 | DVIR\GJ2177  | XM_002049737.1 |
| DM11800P1 | 0.14883153 | -1.1391422 | -1.1189542 | -1.2117974 |              |                |
| DM11203P2 | 0.14885321 | -1.2029444 | -1.1096077 | -2.2817159 |              |                |
| DM14019P4 | 0.14895347 | -1.2454487 | -1.0394784 | -1.059786  |              |                |
| DM04640P1 | 0.1493463  | -1.1596847 | -1.0275646 | -1.1599094 | PR38A        | NM_001141758.1 |
| DM04796P1 | 0.14937545 | -1.1517191 | -1.1896092 | -1.2716162 |              |                |
| DM04973P1 | 0.14973405 | -1.0250088 | -1.2299186 | 1.0136908  |              |                |
| DM13293P2 | 0.14973553 | -1.1088518 | -1.2913872 | -1.0418781 |              |                |
| DM11377P2 | 0.14973648 | 1.007576   | 1.0881929  | 1.1991976  |              |                |
| DM01409P1 | 0.14981636 | -1.0326251 | -1.210463  | -1.0186713 | CPIPJ_CPIJOC | XM_001844979.1 |

|           |            |            |            |            |                            |
|-----------|------------|------------|------------|------------|----------------------------|
| DM00869P3 | 0.14983381 | -1.129041  | -1.2374989 | -1.213267  | LOC1000558:XM_001914659.1  |
| DM08067P1 | 0.14992027 | -1.1098701 | -1.2414902 | -1.082428  |                            |
| DM07220P3 | 0.14995632 | 1.4930625  | -3.4388618 | 1.6885854  |                            |
| DM14129P3 | 0.14996226 | -1.1698554 | -1.0535303 | 1.0310202  |                            |
| DM09855P3 | 0.14996287 | -1.22677   | 1.0133259  | -1.1549784 |                            |
| DM10037P1 | 0.15006931 | 1.0770081  | 1.0739472  | -1.1756107 |                            |
| DM00998P1 | 0.15008897 | -1.0862544 | -1.0697999 | -1.1393198 | LOC658420 XM_964808.2      |
| DM11654P2 | 0.15019354 | -1.0087348 | 1.0923574  | -1.1266135 |                            |
| DM12105P3 | 0.15020448 | -1.1619058 | -1.1460323 | -1.1424854 | AGAP_AGAP0 XM_318757.4     |
| DM01766P2 | 0.1502244  | -1.0956867 | 1.1674275  | -1.0237037 |                            |
| DM14419P1 | 0.15025657 | 1.3306273  | 1.4207978  | 1.2650056  |                            |
| DM05740P1 | 0.15034385 | -1.28219   | -1.1829106 | -1.0450953 |                            |
| DM02606P2 | 0.15036851 | -1.0119712 | -1.0292566 | -1.1168871 | RRAGD NM_001079428.1       |
| DM03164P1 | 0.15038042 | -1.0149884 | -1.1568394 | -1.3474624 | LOC1000596:XM_001915077.1  |
| DM14686P1 | 0.15043125 | -1.0052016 | -1.0308937 | 1.0695636  |                            |
| DM10941P2 | 0.15044123 | -1.285981  | -1.1730876 | -1.260149  |                            |
| DM05624P3 | 0.15051825 | 1.198872   | 1.1340729  | 1.3461751  |                            |
| DM11935P2 | 0.1505531  | 1.120177   | 1.0050281  | -1.0394653 |                            |
| DM13310P1 | 0.15058446 | 1.0196742  | -1.082458  | -1.2270584 |                            |
| DM08684P1 | 0.15066576 | 1.2059525  | 1.2616224  | 1.1740564  |                            |
| DM05929P1 | 0.15069598 | -1.1225058 | -1.0833551 | -1.2230202 |                            |
| DM07200P3 | 0.15073165 | -1.1116502 | -1.2179443 | -1.2989236 |                            |
| DM04027P3 | 0.15076225 | -1.174552  | -1.1209823 | -1.183773  | LOC1002216:XM_002194638.1  |
| DM07863P2 | 0.15082195 | -1.0208633 | 1.2381676  | 1.5107378  |                            |
| DM02567P1 | 0.15093222 | -1.0944512 | 1.1595684  | 1.1646644  | AAEL_AAEL01 XM_001661829.1 |
| DM10120P1 | 0.15105906 | -1.0341432 | 1.1338344  | 1.1692306  |                            |
| DM06763P1 | 0.15106915 | 1.0612632  | 1.1721398  | 1.3704531  |                            |
| DM07414P1 | 0.1510984  | -1.3830752 | 1.0315695  | 1.2848167  |                            |
| DM07916P1 | 0.15111746 | -1.1768308 | 1.0406057  | 1.3659151  |                            |
| DM02322P3 | 0.15115093 | -1.0824761 | -1.1496454 | -1.2284445 | AGXT NM_001088479.1        |
| DM00342P3 | 0.1511685  | -1.1243753 | -1.0414544 | -1.2063812 | LOC1001616:XM_001948654.1  |
| DM01971P3 | 0.15118237 | -1.2435644 | -1.0210297 | -1.1041137 | DGR1\GH150:XM_001984286.1  |
| DM07538P2 | 0.15118597 | -1.0677648 | 1.0726794  | -1.176856  |                            |
| DM00012P1 | 0.15121146 | -1.1221226 | -1.0837039 | -1.3321015 | ITM1 NM_201458.1           |
| DM01004P3 | 0.15122367 | 1.0927148  | 1.2406387  | 1.0672023  | LOC552422 XM_624796.2      |
| DM12965P1 | 0.15137453 | 1.2758582  | 1.6688366  | 1.4131403  |                            |
| DM09866P2 | 0.15140119 | -1.0672201 | 1.0603935  | 1.217863   |                            |
| DM05427P3 | 0.15144518 | -1.3902898 | -1.1424618 | -1.0454594 |                            |
| DM11811P1 | 0.1514802  | 1.0478086  | -1.6609639 | -1.7619783 |                            |
| DM07269P4 | 0.15149595 | 1.1521767  | -1.6381093 | 1.6464146  |                            |
| DM02404P3 | 0.15149797 | -1.1663481 | -1.2002196 | -1.1141397 | LOC1001625(XM_001943151.1  |
| DM11897P2 | 0.15160935 | 1.1892961  | -1.175659  | 1.3081691  |                            |
| DM12874P1 | 0.15162766 | -1.1749333 | 1.1273433  | -1.0847646 |                            |
| DM05756P3 | 0.15163083 | 1.2387798  | 1.0548524  | 1.1636802  |                            |
| DM01454P1 | 0.15176563 | 1.0084987  | -1.2372121 | 1.2005041  | DMOJ\GI208(XM_002005991.1  |
| DM02798P2 | 0.15178035 | -1.3494595 | -1.3224282 | -1.0332806 | DSEC\GM173 XM_002039071.1  |
| DM10820P1 | 0.15188552 | 1.016639   | 1.1279072  | -1.1220404 |                            |
| DM13027P3 | 0.1518902  | 1.0365304  | 1.1349202  | 1.1713802  |                            |
| DM09682P3 | 0.15195416 | -1.0195435 | -1.035123  | -1.1941323 |                            |
| DM07013P2 | 0.15196368 | -1.0206587 | -2.2853878 | 1.321995   |                            |

|           |            |            |            |            |                           |
|-----------|------------|------------|------------|------------|---------------------------|
| DM07486P3 | 0.15205069 | 1.1079506  | 1.4241052  | -1.5687104 |                           |
| DM01392P4 | 0.15214393 | -1.3388518 | -1.1782569 | -1.8981572 |                           |
| DM10636P3 | 0.15219842 | 1.0969185  | -1.1682764 | 1.483794   |                           |
| DM03553P1 | 0.15222819 | -1.3260028 | -1.190521  | -1.105931  | LOC1001634(XM_001943188.1 |
| DM12223P4 | 0.15225081 | 1.1603922  | 1.2579117  | 1.0591216  |                           |
| DM06271P1 | 0.15228775 | -1.0673746 | 1.0123155  | -1.2290077 |                           |
| DM01295P4 | 0.15233973 | -1.1098528 | 1.1269032  | -1.2218255 | LOC1002033(XM_002161564.1 |
| DM14267P1 | 0.15236342 | 1.1745576  | 1.1078849  | 1.4368443  |                           |
| DM06066P3 | 0.15242337 | -1.0576617 | -1.3366419 | -1.1701654 | DMOJ\GI147(XM_002010284.1 |
| DM09266P3 | 0.15247308 | 1.0274874  | 1.1979729  | 1.5971955  |                           |
| DM03544P1 | 0.15261981 | 1.1439933  | 1.0477912  | -1.0398132 |                           |
| DM02120P1 | 0.15267268 | -1.2015525 | -1.1383042 | -1.0825009 | 15-Sep NM_001170338.1     |
| DM11820P3 | 0.15271997 | -1.1403464 | 1.1228948  | -1.0682286 |                           |
| DM09524P3 | 0.15272218 | 1.4840763  | -1.2951996 | 1.033713   |                           |
| DM04921P1 | 0.15273574 | 1.5559937  | 1.6071033  | -1.3721266 |                           |
| DM05571P4 | 0.15278305 | -1.2073834 | 1.0290358  | 1.0064191  |                           |
| DM11563P2 | 0.15292257 | 1.1581304  | 1.0509048  | -1.0904974 |                           |
| DM00547P1 | 0.15298776 | -1.0288359 | 1.081654   | -1.1623964 | LOC1002023(XM_002160439.1 |
| DM10739P2 | 0.15303318 | 1.426917   | 1.0336757  | -1.3198777 |                           |
| DM13736P1 | 0.15306291 | -1.1023495 | -1.1567417 | 1.2696242  |                           |
| DM08840P1 | 0.15325601 | 1.0072501  | -1.1430641 | 1.8748614  |                           |
| DM06408P2 | 0.1533174  | 1.0895864  | 1.0365937  | -1.0611231 |                           |
| DM07247P1 | 0.15334886 | 1.0024257  | 1.0366714  | 1.171846   |                           |
| DM03005P1 | 0.15337677 | -1.0996006 | -1.0050406 | -1.2952654 |                           |
| DM00636P1 | 0.1534711  | -1.001738  | 1.0882926  | -1.0541842 | LOC1001689(XM_001943419.1 |
| DM09159P1 | 0.15348683 | -1.4066088 | -1.238366  | 1.1813232  |                           |
| DM08706P1 | 0.15349849 | 1.5226214  | 1.4956667  | 1.223338   |                           |
| DM01389P2 | 0.15351726 | -1.2152594 | -1.318658  | -1.2612977 | NEMVEDRAFT XM_001635694.1 |
| DM06034P1 | 0.15354608 | 1.3917786  | 1.5223404  | 1.4099494  |                           |
| DM03954P4 | 0.15358184 | -1.1093706 | -1.03412   | -1.3155711 |                           |
| DM07324P3 | 0.1536031  | -1.3171985 | -1.0126483 | 1.2942705  |                           |
| DM10487P1 | 0.15363373 | 1.0965234  | -1.3660219 | 1.1382011  |                           |
| DM14158P2 | 0.15365589 | -1.1289318 | -1.0199385 | 1.121113   |                           |
| DM00901P3 | 0.15371197 | 1.453609   | 1.4323202  | 1.6252874  |                           |
| DM08535P1 | 0.15384533 | 1.405357   | 1.2464051  | 1.2664393  |                           |
| DM08192P1 | 0.15384987 | 1.1773298  | 1.2464073  | 1.3022362  |                           |
| DM06547P2 | 0.15389326 | 1.10296    | -1.0694014 | -1.1141107 |                           |
| DM07185P2 | 0.15405706 | -1.1311194 | -1.156211  | -1.1046193 |                           |
| DM11805P3 | 0.15419465 | 1.4046732  | 1.3889759  | 1.5675173  |                           |
| DM06035P3 | 0.15433808 | -1.1272326 | 1.0301129  | 1.2981551  |                           |
| DM12528P3 | 0.15436094 | -1.2179964 | -1.0720278 | -1.0367888 |                           |
| DM07458P1 | 0.15436272 | 1.381392   | 1.6977049  | -1.1136408 |                           |
| DM08452P1 | 0.15441902 | 1.1434438  | 1.33181    | 1.2476456  |                           |
| DM01121P2 | 0.15442814 | -1.0037575 | 1.0691247  | -1.0632883 | DPER\GL127(XM_002019944.1 |
| DM06997P1 | 0.15453023 | 1.8131849  | 1.0900469  | 2.809704   |                           |
| DM02236P2 | 0.15454525 | 1.0528977  | 1.3074943  | -1.1924481 | SNOG_05978 XM_001796314.1 |
| DM08040P1 | 0.15459141 | -1.2413068 | 1.0121942  | 1.245088   |                           |
| DM02398P2 | 0.15461072 | 1.0774353  | -1.4239002 | 1.4560928  |                           |
| DM14072P2 | 0.15461968 | -1.2558953 | -1.0346248 | 1.0955502  |                           |
| DM03675P1 | 0.15464294 | 1.2075865  | -1.0825026 | 1.1422147  |                           |



|           |            |            |            |            |                           |
|-----------|------------|------------|------------|------------|---------------------------|
| DM10743P3 | 0.15473896 | 1.1653606  | 1.2855259  | 1.011964   |                           |
| DM11653P1 | 0.15478551 | -1.3261687 | 1.0493603  | -1.3493339 |                           |
| DM11326P2 | 0.15480101 | 1.1634191  | 1.0140798  | 1.1208284  |                           |
| DM10981P1 | 0.1548019  | 1.1417181  | 1.4484127  | 1.1423542  |                           |
| DM10840P1 | 0.15489909 | 1.1037021  | -1.1802168 | 1.1951445  |                           |
| DM04983P1 | 0.15495482 | 1.1258552  | 1.2384855  | 1.2106879  |                           |
| DM07233P1 | 0.15497482 | 1.2418044  | -2.3812196 | 2.1661754  |                           |
| DM00551P1 | 0.15498647 | 1.1003215  | 1.1063867  | -1.0404912 | DYAK\GE110\XM_002086823.1 |
| DM03829P1 | 0.15513746 | -1.1146809 | -1.0542161 | -1.0536337 | DMOJ\GI198\XM_002004202.1 |
| DM08016P3 | 0.15526488 | 1.0608282  | 1.101263   | 1.2473042  |                           |
| DM07738P1 | 0.15526928 | -1.1064793 | -1.3854841 | -1.1931849 |                           |
| DM11707P3 | 0.15530276 | 1.1147627  | 1.1158713  | 1.4437603  |                           |
| DM09410P3 | 0.15532495 | 1.1798953  | 1.1567374  | -1.0183059 |                           |
| DM06690P2 | 0.15534605 | 1.4997178  | 1.1960492  | 1.2106593  |                           |
| DM11229P3 | 0.15536724 | -1.0144746 | 1.1059679  | -1.3781631 |                           |
| DM14940P2 | 0.15537497 | 1.385743   | 1.4821727  | -1.0639516 |                           |
| DM05021P3 | 0.15545447 | 1.0703927  | -1.2871795 | 1.2147285  |                           |
| DM07197P2 | 0.15549329 | 1.2948332  | -1.9114959 | 1.9201895  |                           |
| DM00524P1 | 0.1555332  | -1.063014  | 1.0159822  | -1.200989  | DERE\GG211 XM_001974337.1 |
| DM11063P3 | 0.15562868 | 1.4622781  | 1.0392983  | -1.1762353 |                           |
| DM00770P2 | 0.1556688  | -1.0438895 | -1.3732489 | -1.2949436 | LOC1002292\XM_002195430.1 |
| DM06381P1 | 0.15575013 | -1.0454857 | 1.0427529  | 1.040892   |                           |
| DM14235P2 | 0.1558494  | -1.0028757 | -1.1445004 | -1.0122674 | DGRI\GH248\XM_001992647.1 |
| DM06409P2 | 0.1559128  | 1.0141892  | 1.0682989  | -1.1678113 |                           |
| DM08176P1 | 0.15594234 | -1.0706669 | -1.1105397 | -1.1853868 |                           |
| DM08769P2 | 0.15594523 | 1.0180846  | 1.202078   | 1.413825   |                           |
| DM12636P1 | 0.15597747 | -1.5813526 | -2.1649187 | -1.603979  |                           |
| DM08065P1 | 0.15603055 | -1.1454221 | -1.120386  | 1.0967091  |                           |
| DM13117P1 | 0.15611094 | -1.2438691 | -1.1961852 | 1.2471268  |                           |
| DM12960P1 | 0.15613656 | 1.0556649  | 1.2563941  | 1.0582707  |                           |
| DM05547P2 | 0.1561995  | -1.0298735 | -1.0495632 | 1.3245318  | LOC1001593\XM_001948648.1 |
| DM03320P3 | 0.1562114  | -1.0211282 | 1.0430847  | -1.173553  | AGAP_AGAP0 XM_316682.4    |
| DM02127P3 | 0.15622385 | -1.0235822 | -1.2469037 | 1.364218   | DYAK\GE224\XM_002095538.1 |
| DM05995P1 | 0.15624857 | -1.0495802 | -1.070949  | 1.1477875  | ODC XM_001855873.1        |
| DM07513P1 | 0.15630911 | 1.0388741  | 1.1730622  | 1.1520871  |                           |
| DM11391P1 | 0.15631516 | 1.0969732  | -1.0544119 | -1.0646374 |                           |
| DM06328P1 | 0.1564021  | 1.0201172  | 1.1731294  | -1.0525533 |                           |
| DM00706P2 | 0.15640607 | -1.2621919 | -1.1576316 | 1.0125966  | ISCW_ISCWC XM_002410940.1 |
| DM06897P1 | 0.15644138 | 1.315469   | 1.5247751  | 1.1159644  |                           |
| DM06261P4 | 0.15645076 | -1.0141622 | 1.0969042  | -1.0718625 |                           |
| DM11924P4 | 0.15646657 | -1.0367312 | -1.0353085 | 1.1094162  |                           |
| DM12426P4 | 0.15647633 | -1.0430621 | -1.4514098 | -1.2885098 |                           |
| DM03679P1 | 0.15654787 | 1.2184294  | 1.1126161  | 1.3756584  |                           |
| DM00635P2 | 0.15657318 | -1.0793417 | 1.1335865  | 1.2247316  | ISCW_ISCWC XM_002406012.1 |
| DM03571P3 | 0.15660283 | 1.0662506  | 1.0963129  | 1.4726989  | LOC1001851\XM_002124301.1 |
| DM01473P3 | 0.15666483 | -1.1886362 | -1.0690589 | -1.2016424 |                           |
| DM05289P2 | 0.15680194 | -1.2168211 | -1.1885146 | -1.142655  |                           |
| DM04183P2 | 0.15691642 | 1.2223586  | 1.1232228  | 1.0336128  |                           |
| DM02417P3 | 0.15692177 | -1.3020763 | -1.1000266 | -1.4138683 | SAMD XM_001658136.1       |
| DM12232P3 | 0.15701377 | -1.1113224 | -1.1963897 | -1.1343052 |                           |

|           |            |            |            |            |                            |
|-----------|------------|------------|------------|------------|----------------------------|
| DM01806P2 | 0.15703179 | 1.0450015  | -1.1169107 | -1.6743236 | ISCW_ISCWC XM_002413524.1  |
| DM05074P1 | 0.15704311 | 1.0155501  | -1.0402713 | 1.1527555  |                            |
| DM12506P3 | 0.15710111 | 1.0089338  | -1.363193  | 1.0802994  |                            |
| DM02018P1 | 0.15717569 | -1.1940566 | -1.272877  | -1.1108983 | DMOJ\GI216 XM_002003626.1  |
| DM13318P1 | 0.15723762 | -1.066645  | -1.15369   | -1.000986  |                            |
| DM12049P2 | 0.15726736 | -1.1374518 | -1.10076   | -1.2913507 |                            |
| DM01413P2 | 0.15736115 | -1.0234797 | 1.141272   | -1.0137597 | AGAP_AGAP0 XM_314468.4     |
| DM10067P1 | 0.15736532 | -1.018775  | -1.65808   | -1.4941741 |                            |
| DM03740P2 | 0.15739954 | 1.082844   | 1.7169111  | 1.693279   |                            |
| DM08057P3 | 0.15746407 | 1.1166135  | 1.1006578  | 1.2413187  |                            |
| DM11939P1 | 0.15750557 | 1.3722899  | 2.1784525  | 1.0629989  |                            |
| DM00410P1 | 0.15759447 | 1.1482489  | 1.3098664  | -1.0147198 |                            |
| DM02498P2 | 0.1577278  | -1.1384329 | -1.0909842 | -1.2121718 | PSMC7 XM_001863382.1       |
| DM10543P1 | 0.15773079 | 1.4542413  | 2.1630223  | 1.3306873  |                            |
| DM14806P1 | 0.15776552 | -1.038768  | 1.015212   | 1.2574567  |                            |
| DM01962P3 | 0.1578039  | -1.1518316 | -1.09943   | 1.1205157  | DGRI\GH143 XM_001985611.1  |
| DM01911P3 | 0.1578107  | 1.1962217  | -1.1094033 | -1.7430733 |                            |
| DM02429P2 | 0.15785882 | -1.1479832 | -1.3475492 | -1.1151558 | LOC1001225 XM_001606114.1  |
| DM12126P3 | 0.1579307  | -1.2275293 | -2.1777368 | 1.6219682  |                            |
| DM03507P3 | 0.15794098 | -1.0060941 | 1.0539086  | -1.0513412 | DMOJ\GI106 XM_002001096.1  |
| DM10494P1 | 0.1580301  | 1.054081   | -1.3300626 | 1.1266569  |                            |
| DM08332P3 | 0.158031   | 1.352207   | 1.7131339  | 1.0550293  |                            |
| DM05946P3 | 0.15805896 | -1.1921997 | -1.131802  | -1.2747891 |                            |
| DM13313P2 | 0.15812625 | -1.297953  | -1.2784467 | -1.1044667 |                            |
| DM04158P2 | 0.1581881  | -1.1787715 | -1.2920227 | 1.0445296  | ISCW_ISCWC XM_002411457.1  |
| DM07073P4 | 0.15830222 | 1.6334944  | -1.2574543 | 3.0634966  |                            |
| DM08950P3 | 0.15839706 | 1.2065641  | 1.3790786  | 1.1685121  |                            |
| DM02269P1 | 0.1585415  | -1.1447309 | -1.1139394 | -1.1743797 | SF3B3 XM_511081.2          |
| DM10503P2 | 0.15861535 | -1.1254439 | -1.5594497 | -1.2352755 | DPER\GL209 XM_002027400.1  |
| DM12123P3 | 0.15861782 | 1.4407437  | -7.363777  | -1.154178  |                            |
| DM06681P4 | 0.15864386 | -1.2605195 | 1.1974612  | 1.048911   |                            |
| DM12806P1 | 0.15874077 | 1.0392724  | 1.3203049  | -1.155184  |                            |
| DM10063P1 | 0.15875338 | -1.1272928 | 1.4883742  | 1.4178797  |                            |
| DM13610P2 | 0.15876041 | -1.0612524 | -1.4932296 | 1.6286216  |                            |
| DM06520P1 | 0.15881032 | 1.0839807  | 1.1251796  | 1.1662577  |                            |
| DM07857P4 | 0.15882613 | -1.0857275 | 1.1126121  | 1.3069158  |                            |
| DM04890P3 | 0.15888436 | -1.0107627 | -1.1636109 | 1.0023512  |                            |
| DM01196P2 | 0.15889022 | -1.0279151 | -1.0807222 | -1.1367189 | ADI XM_001649849.1         |
| DM00621P3 | 0.15890054 | -1.1670096 | -1.0531096 | 1.0539627  | LOC1000144 XM_001364492.1  |
| DM07139P2 | 0.15896256 | 1.5917412  | -1.8887211 | 3.6267774  |                            |
| DM12385P1 | 0.15919797 | -1.3430089 | 1.6258113  | -2.444097  |                            |
| DM00584P3 | 0.15923195 | 1.0261993  | -1.2227747 | 1.0934827  | ATPCL XM_623152.2          |
| DM06040P4 | 0.1592423  | 1.3864385  | 1.2038528  | 1.1622504  |                            |
| DM09353P2 | 0.15928599 | -1.0859787 | -1.0637469 | -1.15089   |                            |
| DM00155P1 | 0.15936856 | -1.0257096 | 1.0516814  | -1.0924193 | AAEL_AAELOC XM_001658257.1 |
| DM01991P2 | 0.1594617  | 1.1613071  | 1.1517187  | 1.0914788  | DERE\GG144 XM_001971375.1  |
| DM13958P3 | 0.1595115  | -1.0005257 | -1.6750596 | 1.3100377  |                            |
| DM01025P3 | 0.15951307 | 1.115425   | -1.0353742 | -1.0207912 | LOC659493 XM_965796.2      |
| DM04371P3 | 0.1595305  | -1.1723452 | -1.2199327 | 1.2878855  |                            |
| DM08763P3 | 0.15956151 | -1.0080577 | 1.0025014  | -1.1624799 |                            |

|           |            |            |            |            |            |                    |
|-----------|------------|------------|------------|------------|------------|--------------------|
| DM08801P2 | 0.15962408 | 1.7454153  | 3.082639   | -1.0700767 |            |                    |
| DM05919P3 | 0.15970643 | 1.2436299  | 1.2654884  | 1.089779   |            |                    |
| DM12933P1 | 0.15972039 | 1.111926   | 1.0795729  | 1.6339306  |            |                    |
| DM14945P1 | 0.15975454 | -1.1161444 | -1.1963798 | -1.1395042 |            |                    |
| DM05388P2 | 0.1597755  | -1.1683236 | -1.3149337 | -1.3452963 |            |                    |
| DM05594P4 | 0.15977953 | 1.0318136  | 1.2151169  | -1.0160539 |            |                    |
| DM09842P1 | 0.15978761 | 1.0446424  | 1.2559159  | -1.020897  |            |                    |
| DM04322P2 | 0.15978825 | -1.0020876 | -1.0105301 | -1.0968438 |            |                    |
| DM07544P3 | 0.15982528 | -1.3261324 | -1.1105852 | -1.1576794 |            |                    |
| DM01979P1 | 0.15986286 | 1.1165209  | 1.1334782  | -1.0472708 |            |                    |
| DM00433P1 | 0.15989043 | -1.1630522 | -1.0647599 | -1.2600653 | LOC1001172 | XM_001601492.1     |
| DM00890P1 | 0.16006033 | 1.2745951  | 1.033114   | 1.2313867  | LOC1001417 | XM_001810466.1     |
| DM06834P1 | 0.16007882 | -1.0501281 | 1.0411196  | -1.2750279 |            |                    |
| DM08448P1 | 0.1600906  | 1.1037228  | 1.3010932  | 1.5160631  |            |                    |
| DM12287P2 | 0.16016005 | -1.111349  | -1.1317636 | -1.3074839 |            |                    |
| DM00648P3 | 0.16016448 | -1.1278905 | -1.4536505 | -1.8643259 | ZMCM6B     | NM_001087121.1     |
| DM03046P3 | 0.16021776 | 1.0039911  | 1.043099   | -1.215151  |            |                    |
| DM11912P3 | 0.1602986  | -1.0766991 | 1.0645435  | -1.3817952 |            |                    |
| DM10274P2 | 0.16031325 | -1.503817  | 1.147175   | -1.3460975 |            |                    |
| DM13049P3 | 0.16035718 | 1.0936216  | 1.03982    | -1.1637331 | ACMSD      | NM_001089494.1     |
| DM13788P4 | 0.16042066 | -1.3478353 | -1.3445706 | -1.0895938 |            |                    |
| DM05689P1 | 0.16043457 | 1.9298223  | 1.186578   | 1.837896   |            |                    |
| DM01406P1 | 0.16045061 | 1.0981668  | -1.0564884 | -1.0861902 | DWIL\GK217 | XM_002063045.1     |
| DM03766P1 | 0.16046885 | -1.0098493 | 1.2021424  | -1.1794319 | AAEL_AAEL  | LOC XM_001650409.1 |
| DM12104P1 | 0.16066942 | -1.1708542 | -1.0078465 | -1.1180284 |            |                    |
| DM12494P1 | 0.16074194 | 1.7741065  | 2.1364691  | -1.0790707 |            |                    |
| DM03967P3 | 0.16078883 | -1.179874  | -1.1755239 | -1.3794097 | DSIM\GD168 | XM_002106312.1     |
| DM15003P2 | 0.16082484 | -1.1042125 | 1.1841463  | -1.206734  |            |                    |
| DM04227P4 | 0.16091266 | 1.0309381  | 1.337356   | 1.2740653  |            |                    |
| DM12516P1 | 0.16094768 | -1.1236229 | -1.487184  | -1.1400608 |            |                    |
| DM12691P2 | 0.1609487  | 1.553591   | -3.3381329 | 1.5706758  |            |                    |
| DM00467P4 | 0.16098583 | 1.0075619  | -1.2557663 | -1.2719114 | FAF1       | NM_001091736.1     |
| DM09293P1 | 0.16103916 | -1.3741317 | -1.161585  | -1.4830642 |            |                    |
| DM01083P1 | 0.1610507  | -1.0321665 | -1.2101238 | -1.2605988 | LOC1001592 | XM_001946820.1     |
| DM08929P2 | 0.16111098 | 1.1374207  | 1.0803292  | 1.4108512  |            |                    |
| DM06879P2 | 0.16115639 | -1.0055962 | -1.1526583 | 1.040036   |            |                    |
| DM14823P2 | 0.16121022 | -1.2566869 | 1.2173841  | -1.3582692 |            |                    |
| DM09501P3 | 0.16123188 | 1.237424   | -1.2041757 | 2.2081017  |            |                    |
| DM07088P3 | 0.16123658 | -1.0135839 | -1.2542282 | -1.1368715 |            |                    |
| DM11038P4 | 0.161291   | 1.0130132  | 1.1206106  | 1.2096753  |            |                    |
| DM12357P2 | 0.1612996  | 1.0429262  | -2.3938737 | 1.3709573  |            |                    |
| DM00416P4 | 0.16131191 | -1.0146667 | -1.2118341 | -1.2199045 | DMOJ\GI196 | XM_002004378.1     |
| DM12711P4 | 0.16136995 | 1.5177637  | 1.287999   | -1.4139609 |            |                    |
| DM02721P1 | 0.16150378 | -1.1104933 | -1.0377005 | -1.0616643 |            |                    |
| DM00781P1 | 0.16159542 | 1.0356315  | -1.0163178 | 1.2893715  | LOC1001207 | XM_001604325.1     |
| DM11911P1 | 0.16170973 | -1.0811064 | 1.2476679  | -1.029805  |            |                    |
| DM02576P3 | 0.16171965 | -1.1093906 | 1.0961338  | 1.2277476  |            |                    |
| DM00987P2 | 0.16174191 | -1.1270745 | 1.1193608  | -1.1248205 |            |                    |
| DM08174P3 | 0.16192174 | 1.0061232  | -1.1422138 | -1.42434   |            |                    |
| DM01364P3 | 0.1621139  | -1.2782584 | -1.160589  | -1.3709277 | SNRPA1     | XM_843830.1        |

|           |            |            |            |            |            |                |
|-----------|------------|------------|------------|------------|------------|----------------|
| DM03840P3 | 0.1621191  | -1.2899945 | -1.0925782 | 1.1530635  |            |                |
| DM08056P1 | 0.16213268 | -1.0618494 | -1.4361013 | -1.0652454 |            |                |
| DM07317P2 | 0.1621454  | 1.2328373  | 1.1601336  | 1.5244132  |            |                |
| DM07397P3 | 0.16215461 | -1.1531522 | -1.0152167 | -1.2854284 |            |                |
| DM08609P1 | 0.16216223 | 1.0129904  | 1.0852902  | 1.6988355  |            |                |
| DM03039P1 | 0.16218407 | -1.0608085 | -1.292755  | 1.3112302  |            |                |
| DM07420P2 | 0.16219318 | 1.0054232  | -1.0199162 | 1.3996019  |            |                |
| DM15251P2 | 0.16219579 | -1.1597356 | 1.0722862  | 1.2278895  |            |                |
| DM15167P3 | 0.1622645  | 1.4042972  | 1.5069182  | 1.5616956  |            |                |
| DM05503P1 | 0.16231287 | -1.0206828 | -1.0934608 | 1.0442306  |            |                |
| DM07545P1 | 0.16231528 | 1.2657261  | -1.4148477 | 2.2535932  |            |                |
| DM02007P3 | 0.16240561 | -1.0563699 | -1.2171701 | -1.2417102 | DERE\GG144 | XM_001971348.1 |
| DM00165P1 | 0.1624165  | -1.0966055 | 1.0378733  | -1.0009774 | CTSL       | NM_001170617.1 |
| DM06228P3 | 0.1624596  | 1.1237204  | -1.1243143 | -1.1544782 | GSPATT0002 | XM_001457473.1 |
| DM12338P2 | 0.16246425 | -1.1069663 | -1.1074619 | -1.1486293 | NUTF2      | XM_968457.1    |
| DM00124P1 | 0.1625282  | -1.2956953 | -1.2537102 | -1.0554276 | AGAP_AGAP0 | XM_557743.3    |
| DM08068P1 | 0.1626205  | -1.1887846 | 1.0600297  | 1.0840671  |            |                |
| DM14146P1 | 0.16263969 | -1.3574456 | -1.0324128 | -1.065758  |            |                |
| DM00624P2 | 0.1626696  | 1.0250942  | 1.0108036  | -1.0877509 | FAM108B    | NM_146096.3    |
| DM02608P2 | 0.16270119 | -1.1819748 | -1.278907  | -1.2590212 | CSNK2B     | NM_001005081.1 |
| DM09401P3 | 0.16276829 | 1.1492953  | 1.1060394  | -1.1725342 |            |                |
| DM01582P3 | 0.16277687 | -1.0553949 | -1.0429621 | 1.1678674  | VDAC2      | NM_199585.2    |
| DM05399P3 | 0.16278265 | 1.1805395  | 1.2075332  | 1.3599505  |            |                |
| DM03068P1 | 0.16302733 | -1.0110029 | 1.0543507  | -1.1153588 | LOC1000180 | XM_001366619.1 |
| DM07900P1 | 0.16307494 | -1.0118942 | 1.0928526  | 1.0036074  |            |                |
| DM09291P1 | 0.16310959 | 1.4620008  | 1.4188668  | -1.0675305 |            |                |
| DM09644P1 | 0.16327241 | -1.1971028 | -1.1596782 | -1.0827208 |            |                |
| DM01689P1 | 0.16328184 | -1.1401268 | -1.2007205 | -1.0637846 | BRAFLDRAFT | XM_002586217.1 |
| DM10549P2 | 0.16332905 | 1.2147806  | 1.3034356  | 1.2946537  |            |                |
| DM13184P1 | 0.1634334  | -1.0137832 | -1.0683938 | -1.2502507 |            |                |
| DM10920P1 | 0.16344434 | -1.0653563 | -1.0738667 | -1.1911658 |            |                |
| DM13849P1 | 0.16350682 | -1.0572699 | -1.0837128 | 1.2250519  |            |                |
| DM11617P3 | 0.16355586 | -1.1780276 | 1.1188111  | -1.1546535 |            |                |
| DM02021P1 | 0.16363513 | 1.2839814  | -1.394553  | 2.4224305  |            |                |
| DM06168P1 | 0.16364104 | -1.1716874 | -1.2022141 | -1.1275535 |            |                |
| DM07759P1 | 0.16364554 | -1.1857556 | 1.2706852  | 1.3048711  |            |                |
| DM00756P2 | 0.16374761 | -1.3186398 | -1.297501  | -1.3292372 |            |                |
| DM00907P2 | 0.16383043 | 1.079746   | -1.2150646 | 1.524287   | DYAK\GE160 | XM_002100576.1 |
| DM01949P1 | 0.16386425 | -1.2068241 | -1.110049  | 1.0131135  | DPER\GL125 | XM_002019724.1 |
| DM10886P1 | 0.16387747 | 1.0275912  | -1.2296718 | 1.2622147  | NEMVEDRAFT | XM_001632757.1 |
| DM00046P2 | 0.16390821 | 1.1226526  | -1.0742716 | -1.2029608 | LOC1001219 | XM_001605521.1 |
| DM11477P2 | 0.16390972 | -1.0637075 | -1.5556868 | -1.1546437 |            |                |
| DM09358P2 | 0.16398332 | -1.1039146 | -1.2061349 | -1.0289742 |            |                |
| DM02792P1 | 0.1641551  | 1.2226503  | 1.2779961  | 1.2711806  |            |                |
| DM11767P3 | 0.16415791 | -1.0361375 | 1.132655   | 1.0501319  |            |                |
| DM11045P1 | 0.16434947 | -1.2138329 | -1.0676742 | 1.0839024  |            |                |
| DM11904P4 | 0.16439344 | 1.2479059  | -1.182689  | 1.2525276  |            |                |
| DM13417P1 | 0.16441919 | -1.0047454 | 1.0768027  | 1.1469345  | TMEM41A    | XM_002408913.1 |
| DM05493P4 | 0.16447812 | 1.012517   | 1.0645458  | -1.0596459 |            |                |
| DM11420P3 | 0.16451488 | 1.0292313  | 1.5449401  | 1.1771182  |            |                |

|           |            |            |            |            |                            |
|-----------|------------|------------|------------|------------|----------------------------|
| DM01975P2 | 0.16452946 | -1.173169  | 1.0087457  | -1.0620986 | DWIL\GK159\XM_002063835.1  |
| DM05003P1 | 0.16459632 | -1.0501485 | -1.127949  | -1.1928163 |                            |
| DM01363P3 | 0.16461381 | 1.0117971  | 1.1045685  | -1.0838917 |                            |
| DM01262P1 | 0.1646298  | -1.1216974 | 1.0009224  | -1.1483381 | TRIADDRAFT_XM_002108993.1  |
| DM00139P1 | 0.16472127 | -1.0417452 | -1.0819237 | -1.2390047 | UBE2C XM_543022.2          |
| DM01562P1 | 0.16473472 | -1.0079405 | -1.1239136 | -1.0754434 | LOC1002062\XR_053778.1     |
| DM07899P1 | 0.16481042 | -1.0259013 | 1.1625147  | -1.0443046 | BM1_36265 XM_001898665.1   |
| DM10671P2 | 0.164825   | -1.1319107 | 1.0669954  | -1.2183279 | CKS2 NM_001112803.1        |
| DM00272P2 | 0.16485609 | 1.0025495  | -1.0201    | -1.1474346 | LOC1001612\XM_001952071.1  |
| DM02811P1 | 0.16489555 | -1.1580304 | -1.0755812 | -1.2113957 | DMOJ\GI170\XM_002001758.1  |
| DM14645P3 | 0.16493973 | 1.0808457  | 1.1813949  | 1.3485341  |                            |
| DM06247P2 | 0.16495518 | -1.3429579 | -1.2473439 | -1.5336795 | NEMVEDRAFT_XM_001619820.1  |
| DM03714P3 | 0.16496423 | -1.2530742 | -1.1885443 | -1.1303902 | AAEL_AAELOC_XM_001649838.1 |
| DM00142P3 | 0.16497421 | -1.1998787 | -1.0898209 | 1.0214977  | CYP1 NM_078642.3           |
| DM04046P2 | 0.16503529 | -1.13872   | -1.0574524 | -1.1618426 |                            |
| DM05573P3 | 0.16506423 | 1.0585307  | 1.2786974  | 1.0972095  |                            |
| DM11943P3 | 0.16517201 | 1.0931631  | -1.0112774 | -1.2180834 |                            |
| DM14496P1 | 0.16521615 | 1.1183441  | 1.412488   | 1.2912     |                            |
| DM09140P1 | 0.1652721  | -1.0294507 | -1.0508691 | 1.1539836  |                            |
| DM09772P1 | 0.16543381 | -1.2292477 | -1.0968599 | -1.1423789 |                            |
| DM13060P2 | 0.16548236 | -1.2019635 | 1.0431365  | 1.1789906  | YALIOE18766_XM_504118.1    |
| DM06321P3 | 0.165528   | -1.2008017 | 1.0562469  | -1.0430968 |                            |
| DM06509P2 | 0.16560766 | 1.0947108  | -1.4197732 | -1.0458689 | DSIM\GD206_XM_002103812.1  |
| DM10225P1 | 0.16576159 | 1.2961084  | 1.0857024  | 1.0575228  |                            |
| DM01188P3 | 0.16576868 | -1.1499977 | -1.1067935 | -1.0497034 |                            |
| DM00002P3 | 0.16580255 | -1.1426847 | -1.1129436 | -1.2619048 | DANA\GF219\XM_001964843.1  |
| DM15305P3 | 0.16581589 | -1.2643536 | -1.1556091 | 1.0768486  |                            |
| DM08134P1 | 0.16583681 | -1.0517848 | -1.0281374 | 1.2201712  |                            |
| DM05638P2 | 0.16587049 | -1.1013306 | -1.1247448 | -1.265455  |                            |
| DM15312P2 | 0.16587514 | -1.081528  | -1.0061731 | 1.0929998  | DANA\GF143\XM_001962517.1  |
| DM08901P1 | 0.16590239 | 2.3275003  | 3.9626966  | 1.9730752  |                            |
| DM05788P3 | 0.16595304 | -1.1209058 | -1.2859815 | -1.1406511 |                            |
| DM06379P1 | 0.16610031 | 1.6294597  | 2.2477806  | -1.3855203 |                            |
| DM04867P2 | 0.16612864 | -1.1207542 | -1.2048331 | -1.3068976 |                            |
| DM05742P2 | 0.1661656  | -1.3207304 | 1.0604877  | -1.0889634 | TIM16 XM_001844183.1       |
| DM04353P1 | 0.16622049 | 1.0880152  | 1.0507163  | -1.1310449 |                            |
| DM09258P1 | 0.1662439  | 1.0180624  | -1.1021603 | 1.185274   |                            |
| DM06491P3 | 0.16624561 | 1.1176217  | 1.3619034  | 1.1020994  |                            |
| DM02862P1 | 0.16627584 | -1.455318  | -1.404905  | -1.3901675 |                            |
| DM06952P3 | 0.16631787 | 1.2887282  | -1.1738374 | -1.1159359 |                            |
| DM11123P3 | 0.16632526 | -1.0526674 | 1.0262468  | -1.2017975 | LOC1001135\XM_001599659.1  |
| DM05523P2 | 0.16648296 | -1.1106485 | -1.616414  | -1.1914041 |                            |
| DM02761P1 | 0.1665065  | -1.179677  | -1.5701513 | 1.2052976  |                            |
| DM07809P1 | 0.16658036 | 1.0540409  | -1.0889182 | 1.0996172  |                            |
| DM10328P1 | 0.16659309 | 1.0404344  | -1.5664102 | 1.05541    |                            |
| DM12303P2 | 0.16659479 | -1.3938341 | -1.6533283 | 1.301335   |                            |
| DM02297P2 | 0.16674747 | 1.047776   | 1.0347815  | 1.2232392  | AAEL_AAELOC_XM_001656765.1 |
| DM08865P1 | 0.1668353  | -1.162348  | 1.1161457  | 1.1552094  |                            |
| DM10038P2 | 0.16687657 | 1.4069774  | 1.2128869  | -1.031466  |                            |
| DM02926P1 | 0.16698253 | -1.1004814 | -1.2163532 | 1.4914827  | LOC1001640\XM_001951259.1  |

|           |            |            |            |            |            |                |
|-----------|------------|------------|------------|------------|------------|----------------|
| DM05559P3 | 0.1669951  | 1.0348158  | 1.1269858  | 1.0972532  |            |                |
| DM14906P1 | 0.16699594 | 1.3641773  | 1.4059488  | 1.2168657  |            |                |
| DM14168P1 | 0.16700013 | 1.0475513  | 1.1980749  | 1.2749445  |            |                |
| DM12673P2 | 0.1670088  | -1.055839  | -1.069048  | -1.1803032 |            |                |
| DM15186P2 | 0.16701736 | -1.0995054 | -1.1332643 | 1.0620263  |            |                |
| DM09235P2 | 0.16706333 | -1.6897256 | -1.2576696 | -2.2742426 |            |                |
| DM13661P3 | 0.1672553  | -1.2235959 | 1.0433921  | -1.0800743 |            |                |
| DM08573P3 | 0.16735527 | -1.0020276 | 1.1910084  | 1.3263993  |            |                |
| DM11613P2 | 0.1674344  | -1.0160629 | 1.1925576  | -1.027814  |            |                |
| DM09261P3 | 0.16745394 | 1.0740756  | 1.1353106  | 1.1574444  |            |                |
| DM09152P1 | 0.16752109 | 1.077876   | -1.2260022 | 1.2394409  |            |                |
| DM02386P2 | 0.16755505 | -1.0184782 | -1.0445397 | -1.1515749 | LOC413567  | XM_397008.1    |
| DM00396P1 | 0.16769792 | -1.1126775 | -1.0241481 | -1.2340225 | LOC1000153 | XM_001369436.1 |
| DM07308P4 | 0.1678107  | 1.0932925  | -1.2452002 | -1.0473886 |            |                |
| DM11396P1 | 0.16782464 | -1.1817516 | 1.4361327  | -1.1269281 |            |                |
| DM09236P4 | 0.16784175 | -1.0045346 | -1.1743429 | -1.1310549 |            |                |
| DM10280P1 | 0.16788101 | 1.0398908  | -1.2168779 | 1.2899461  |            |                |
| DM06119P4 | 0.16795135 | 1.1798209  | 1.3893746  | 1.4481356  | LOC661201  | XM_967377.2    |
| DM04282P1 | 0.16824299 | -1.5266154 | -1.579938  | 1.0329895  |            |                |
| DM12248P1 | 0.1682632  | 1.1302962  | -1.040438  | 1.4771998  |            |                |
| DM12189P1 | 0.16829526 | 1.1511765  | 1.304924   | 1.0859994  |            |                |
| DM08090P2 | 0.16831039 | -1.2791749 | 1.3164625  | -1.2482872 | CG34220    | NM_001103783.1 |
| DM05746P3 | 0.16840655 | 1.106214   | -1.2659062 | 1.0334232  |            |                |
| DM05312P3 | 0.16844429 | 1.2487721  | 1.3717104  | 1.0816851  |            |                |
| DM10868P2 | 0.16846097 | 2.0358672  | -1.1151227 | 2.4243734  | LOC1001787 | XM_002131800.1 |
| DM06492P1 | 0.16867216 | -1.0951463 | -1.1575394 | 1.0064386  |            |                |
| DM00948P1 | 0.16871417 | 1.0854849  | -1.0357101 | 1.1641725  | DSEC\GM146 | XM_002035293.1 |
| DM01932P3 | 0.16879429 | -1.0618303 | -1.2464675 | -1.1674501 | DERE\GG187 | XM_001976871.1 |
| DM09806P1 | 0.16889527 | 1.3074114  | 1.0967911  | -1.0808263 |            |                |
| DM00014P1 | 0.16891034 | -1.0156341 | -1.0518507 | -1.1157767 | LOC659477  | XM_965781.2    |
| DM09797P1 | 0.16899823 | -1.2833062 | -1.5761489 | 1.3607702  |            |                |
| DM00056P3 | 0.169001   | -1.0849054 | 1.1697712  | -1.0228733 | NNT        | NM_001128002.1 |
| DM04112P4 | 0.16903664 | 1.050769   | 1.0948381  | -1.0731162 |            |                |
| DM10380P1 | 0.16906431 | 1.7315584  | -1.066775  | 1.1291943  |            |                |
| DM09006P2 | 0.16907027 | -1.1095576 | -1.0057431 | 1.2555891  |            |                |
| DM12486P1 | 0.16912381 | 1.1540792  | 1.1613303  | 1.021913   |            |                |
| DM12899P2 | 0.16918571 | 1.0186309  | 1.2644017  | 1.0688618  |            |                |
| DM08888P3 | 0.16923283 | -1.4527932 | -1.2896785 | 1.1388488  |            |                |
| DM02565P4 | 0.16926524 | -1.5508682 | 1.0310245  | -1.3286933 | DSIM\GD257 | XM_002081421.1 |
| DM11436P1 | 0.1694858  | -1.1127412 | 1.123445   | 1.0250757  |            |                |
| DM03123P1 | 0.16950728 | -1.0675725 | -1.1544122 | 1.067129   |            |                |
| DM00695P3 | 0.1695641  | -1.2072232 | -1.0239009 | 1.0956717  | GLCT-1     | XM_395023.3    |
| DM11143P1 | 0.16962864 | 1.1113584  | -1.153242  | -1.0135541 | LOC659467  | XM_965771.1    |
| DM02951P2 | 0.16964358 | -1.0568045 | -1.0331595 | -1.3338026 | LOC1000829 | XM_001513519.1 |
| DM12167P1 | 0.16965918 | 1.0711472  | 1.056702   | -1.1501598 |            |                |
| DM07313P1 | 0.16966718 | 1.298451   | -1.0686787 | 1.7661341  |            |                |
| DM09434P2 | 0.16983704 | 1.0122013  | 1.0274523  | -1.204887  |            |                |
| DM00669P4 | 0.16986771 | -1.0060922 | -1.1429123 | -1.1562132 | TRIADDRAFT | XM_002110760.1 |
| DM02647P2 | 0.16990659 | -1.0157889 | -1.0396187 | 1.1060027  | NDUFS6     | NM_001172310.1 |
| DM12144P3 | 0.17002451 | 1.1539487  | 1.124836   | -1.0267693 |            |                |

|           |            |            |            |            |              |                |
|-----------|------------|------------|------------|------------|--------------|----------------|
| DM02009P2 | 0.17002721 | -1.4889781 | -1.3953538 | -1.9373902 | DANA\GF158   | XM_001963241.1 |
| DM05741P1 | 0.17010483 | 1.0639508  | 1.210529   | 1.2565978  |              |                |
| DM03419P3 | 0.17014423 | -1.0307693 | -1.4037386 | -1.3492739 | LHX          | XM_001870625.1 |
| DM05187P3 | 0.1703138  | -1.0592518 | -1.3532052 | 1.0654949  |              |                |
| DM06701P1 | 0.1704098  | 1.1563524  | -1.2583148 | 1.5436832  |              |                |
| DM03404P1 | 0.17048389 | -1.0597851 | 1.0472157  | 1.1397481  | DVIR\GJ1231  | XM_002046709.1 |
| DM10406P3 | 0.17048882 | -1.3874764 | -1.6818415 | -1.260224  |              |                |
| DM04211P2 | 0.17066486 | -1.3400978 | -1.1759732 | -1.0533421 | LOC1001240   | XM_001607777.1 |
| DM12165P1 | 0.17066921 | -1.1454219 | 1.0374566  | -1.1641992 |              |                |
| DM03366P4 | 0.17080925 | 1.0053697  | -1.0045093 | -1.2618978 | DSIM\GD104   | XM_002080247.1 |
| DM01317P2 | 0.17083813 | 1.0049917  | 1.0779696  | -1.2184631 | DNAJC5       | XM_417428.2    |
| DM11495P2 | 0.17090645 | 1.3523743  | 1.3461567  | 1.2783355  |              |                |
| DM02955P1 | 0.17092012 | -1.0625883 | -1.1074575 | -1.2064078 |              |                |
| DM00578P1 | 0.1711455  | -1.1940464 | -1.0474054 | -1.0978616 | ACYPI006352  | NM_001162188.1 |
| DM05719P1 | 0.17134257 | -1.3044491 | -1.5110589 | 2.0372097  |              |                |
| DM02701P4 | 0.17137133 | -1.3479266 | 1.007175   | -1.0308431 |              |                |
| DM02622P2 | 0.17140493 | -1.1848803 | -1.2324774 | -1.2095073 | LOC1002180   | XM_002186527.1 |
| DM10204P1 | 0.17144603 | -1.183488  | 1.0254422  | -1.0097383 |              |                |
| DM00595P4 | 0.17148355 | -1.2956877 | -1.3483126 | -1.5256586 | LOC659449    | XM_965753.1    |
| DM14696P3 | 0.17150278 | 1.0616673  | -1.0563619 | 1.2035072  |              |                |
| DM12450P1 | 0.17151037 | -1.1496389 | -1.0656182 | -1.2771842 |              |                |
| DM01969P1 | 0.17153184 | -1.0307486 | 1.0111352  | 1.0191506  | PGUG_03386   | XM_001483955.1 |
| DM05968P4 | 0.1715861  | -1.082086  | 1.0435014  | -1.1143224 | NOLC1        | NM_022869.1    |
| DM03529P1 | 0.171628   | 1.0429564  | 1.1972185  | 1.0106691  |              |                |
| DM03970P2 | 0.17164473 | 1.2242036  | 1.2402744  | 1.6358516  |              |                |
| DM07710P1 | 0.17166856 | -1.0612452 | 1.0576177  | -1.1379818 |              |                |
| DM01327P2 | 0.17168072 | 1.3312354  | 1.2279512  | 1.3007915  | MGC86547     | NM_001094137.1 |
| DM03882P2 | 0.1717532  | -1.020244  | 1.0007182  | -1.1344264 |              |                |
| DM08188P3 | 0.17185949 | -1.0351084 | 1.0512111  | 1.116225   |              |                |
| DM08492P1 | 0.17186232 | -1.0364552 | 1.1833489  | -1.0078715 |              |                |
| DM14105P1 | 0.17189737 | 1.1540787  | -1.455501  | -1.2491993 |              |                |
| DM02033P1 | 0.17193621 | -1.1393161 | -1.186929  | -1.3597369 | LOC1001900   | XM_002193521.1 |
| DM06241P2 | 0.17201103 | -1.1361082 | -1.0517101 | 1.1881799  | LOC1001222   | XM_001605780.1 |
| DM10987P3 | 0.17203656 | -1.016102  | -1.0648655 | -1.400901  |              |                |
| DM11201P2 | 0.17214386 | 1.2970185  | 1.0980654  | -1.0756295 |              |                |
| DM11957P2 | 0.17221825 | -1.4474704 | -2.0388    | -1.533624  |              |                |
| DM10975P3 | 0.17224419 | 1.0627389  | 1.0413773  | -1.1495061 |              |                |
| DM12619P1 | 0.17224848 | -1.0118805 | -1.1176329 | -1.049852  |              |                |
| DM13982P3 | 0.17227277 | -1.6674428 | -1.0844425 | -1.1391118 |              |                |
| DM06051P3 | 0.17230788 | 1.0082127  | -1.066956  | 1.1796584  |              |                |
| DM02956P3 | 0.17240879 | -1.5008456 | -1.7857243 | -1.4708683 | CPIPJ_CPIJOC | XM_001850530.1 |
| DM00845P1 | 0.172503   | 1.0110232  | 1.0387378  | -1.0837834 | LOC661290    | XM_967461.2    |
| DM12058P1 | 0.17252652 | 1.0788271  | 1.1359035  | 1.0054038  |              |                |
| DM13976P2 | 0.17252877 | -1.2463078 | -1.0208442 | 1.0463954  |              |                |
| DM06088P1 | 0.17258288 | -1.2516093 | 1.0553914  | 1.1167531  |              |                |
| DM09428P1 | 0.1726198  | -1.1826271 | -1.0293573 | -1.290249  |              |                |
| DM03349P3 | 0.1728594  | 1.0785358  | -1.0504749 | -1.462554  | STEROID DEF  | XM_001653839.1 |
| DM04752P3 | 0.17299832 | 1.1277348  | 1.3375584  | 1.1684854  |              |                |
| DM08790P3 | 0.17308085 | 1.028709   | -1.260928  | -1.209931  |              |                |
| DM03830P3 | 0.17316173 | -1.172264  | -1.0031708 | -1.3289101 | LOC411640    | XM_395109.3    |

|           |            |            |            |            |            |                |
|-----------|------------|------------|------------|------------|------------|----------------|
| DM01902P1 | 0.17324117 | -2.184904  | -1.8555694 | 1.0147123  | FRIH       | NM_001160521.1 |
| DM05220P1 | 0.17330007 | -1.0043762 | 1.0086672  | -1.1436297 |            |                |
| DM00288P1 | 0.17330487 | -1.0844252 | 1.0841854  | -1.3523579 | DSEC\GM180 | XM_002037789.1 |
| DM05151P4 | 0.17337054 | -1.1212314 | -1.3143165 | 1.6464665  | AK-C-A     | NM_001085706.1 |
| DM12521P2 | 0.1733773  | 1.4818449  | 2.2306561  | 1.4199612  |            |                |
| DM05584P1 | 0.17344281 | -1.1044079 | -1.2276248 | -1.1378709 |            |                |
| DM11969P2 | 0.17370677 | 1.0064864  | -1.3126192 | -1.0505575 |            |                |
| DM00229P1 | 0.17374635 | -1.0119767 | 1.027863   | -1.131363  | LOC1001620 | XM_001947161.1 |
| DM01857P2 | 0.17384802 | 1.0284916  | -1.0715449 | -1.0097086 |            |                |
| DM10226P1 | 0.17384978 | -1.0422336 | 1.1704042  | -1.0687131 |            |                |
| DM15349P1 | 0.17387189 | 1.0424237  | 1.2868034  | 1.1532332  |            |                |
| DM04251P2 | 0.17398344 | 1.035348   | -1.1003702 | 1.0217599  |            |                |
| DM03554P3 | 0.17402945 | -1.0234902 | -1.0892859 | -1.2421864 |            |                |
| DM12764P3 | 0.17409427 | -1.1445813 | -1.1821408 | -1.1360856 |            |                |
| DM09204P2 | 0.17410892 | 1.367263   | 1.2828771  | -1.5102328 |            |                |
| DM08418P2 | 0.17419718 | 2.0416496  | 1.3744484  | 2.0956266  |            |                |
| DM04723P3 | 0.17423134 | 1.0844489  | -1.0679779 | -1.2523134 | LOC587454  | XM_787182.2    |
| DM08549P2 | 0.1744798  | 1.3789184  | 1.5426885  | 1.0431881  |            |                |
| DM11530P3 | 0.1745541  | -1.078018  | 1.1086322  | 1.0669267  |            |                |
| DM04943P3 | 0.17457204 | -1.0627985 | -1.0413406 | -1.1865311 |            |                |
| DM12807P2 | 0.174575   | 1.0548112  | 1.127908   | -1.1759305 |            |                |
| DM02669P3 | 0.17459382 | 1.2418276  | -1.0746082 | 1.168485   | AGAP_AGAP0 | XM_308033.4    |
| DM01067P1 | 0.17470083 | -1.09949   | -1.121334  | 1.0709975  | ISCW_ISCWC | XM_002404684.1 |
| DM11647P2 | 0.17474678 | 1.083547   | -1.30615   | -1.0081079 |            |                |
| DM12132P4 | 0.17475457 | 1.0784917  | -1.0794876 | 1.6781374  |            |                |
| DM06770P1 | 0.17475922 | 1.4053186  | 1.4100107  | 1.0113869  |            |                |
| DM15181P2 | 0.17498398 | 1.0865136  | 1.1600492  | 1.0138829  |            |                |
| DM09642P1 | 0.17499168 | 1.0827016  | 1.2097967  | 1.1169809  |            |                |
| DM02574P1 | 0.17511666 | -1.2018023 | -1.047856  | -1.1925198 | REEP5      | NM_001096221.1 |
| DM02870P2 | 0.17519286 | 1.0712638  | 1.1308595  | -1.1485682 | DERE\GG216 | XM_001974298.1 |
| DM06746P3 | 0.17522499 | 1.2661014  | 1.1379354  | 1.0569683  | DWIL\GK177 | XM_002068847.1 |
| DM13924P3 | 0.17526129 | -1.1744504 | -1.0370799 | 1.1636635  |            |                |
| DM01844P2 | 0.17535692 | -1.0922637 | -1.0603753 | -1.3314271 | TCP1       | NM_030752.2    |
| DM05613P2 | 0.17537631 | 1.0496546  | -1.1323854 | 1.07859    |            |                |
| DM14494P1 | 0.17543876 | -1.0631666 | -1.090671  | 1.0941435  |            |                |
| DM00947P1 | 0.17549855 | -1.5477154 | -1.2317449 | -1.3029505 | ABCE1      | NM_001005628.1 |
| DM02961P1 | 0.17552072 | 1.0441164  | -2.123234  | 1.42461    | DPSE\GA216 | XM_001358387.2 |
| DM04038P1 | 0.17552358 | 1.0124975  | -1.1045884 | -1.2777503 |            |                |
| DM04087P1 | 0.17554982 | 1.0464884  | 1.2834481  | 1.3239682  |            |                |
| DM04156P3 | 0.17556041 | 1.3286437  | 1.5786358  | 1.0240281  | DGRI\GH238 | XM_001994285.1 |
| DM09928P3 | 0.17573823 | -1.2388114 | 1.5452615  | -1.0815403 |            |                |
| DM08416P2 | 0.17575647 | 1.193359   | -1.0132402 | -1.2106752 |            |                |
| DM14443P1 | 0.1757973  | -1.3043948 | 1.0609471  | 1.0933067  |            |                |
| DM11708P2 | 0.17580861 | 1.1377711  | 1.2583642  | 1.1505119  |            |                |
| DM03850P4 | 0.17581347 | 1.1829419  | 1.1215128  | -1.3801444 |            |                |
| DM04703P2 | 0.17583784 | 1.3857213  | 1.439369   | 1.2843393  | RHOBTB2    | XM_543246.2    |
| DM01507P3 | 0.17585966 | 1.1852523  | 1.295103   | 1.192854   |            |                |
| DM07076P2 | 0.17600328 | -1.0374423 | 1.0648144  | -1.1997553 |            |                |
| DM08139P2 | 0.17608039 | -1.2651513 | 1.0348909  | 1.0934565  |            |                |
| DM11147P1 | 0.17611127 | 1.1033822  | 1.1072098  | -1.1447273 |            |                |



|            |            |            |            |            |             |                |
|------------|------------|------------|------------|------------|-------------|----------------|
| DM05944P3  | 0.17617103 | 1.1873322  | 1.1408538  | 1.1731262  | DVIR\GJ1362 | XM_002047751.1 |
| DM04966P1  | 0.17618454 | 1.0569481  | -1.0322943 | -1.4406298 |             |                |
| DM14706P2  | 0.17644545 | -1.1130041 | 1.1823577  | 1.2103775  | MGC84267    | NM_001094273.1 |
| DM101113P3 | 0.17649834 | -1.0155346 | 1.228661   | 1.2370797  |             |                |
| DM09844P1  | 0.1765609  | 1.1050836  | 1.0285606  | 1.1732768  |             |                |
| DM09028P1  | 0.17657393 | -1.1838629 | -1.7078427 | 1.3920062  |             |                |
| DM13943P1  | 0.17667224 | -1.3875239 | -1.1075774 | -1.0359077 |             |                |
| DM02830P1  | 0.17676112 | -1.8604244 | -1.936846  | -1.8114921 |             |                |
| DM13685P2  | 0.17677686 | -1.2325834 | -1.1331089 | -1.1511788 |             |                |
| DM00026P4  | 0.17682345 | 1.0867423  | -1.0856919 | 1.039107   | AGAP_AGAP0  | XM_309799.4    |
| DM04163P3  | 0.17682554 | 1.0934076  | 1.3341845  | 1.3060868  |             |                |
| DM12801P1  | 0.17689198 | -1.0493888 | -1.0053128 | 1.1533521  |             |                |
| DM11549P1  | 0.17700487 | 1.1240989  | -1.0933105 | -1.2003413 |             |                |
| DM09550P1  | 0.17703038 | 1.0046867  | 1.1211393  | 1.5955936  |             |                |
| DM12589P3  | 0.17704205 | 1.0641167  | 1.0583827  | -1.0290065 |             |                |
| DM08746P3  | 0.17714365 | -1.2626365 | -1.3210211 | -2.222142  |             |                |
| DM02196P2  | 0.17725289 | -1.1902478 | -1.0584338 | 1.1000797  | LOC409755   | XM_393249.3    |
| DM09226P1  | 0.17736396 | -1.0044444 | 1.3870733  | -1.1138089 |             |                |
| DM111148P1 | 0.17743956 | 1.037112   | 1.1701411  | -1.0567822 |             |                |
| DM05118P3  | 0.17749918 | 1.25522    | 1.30395    | 1.114472   |             |                |
| DM07155P3  | 0.17751566 | -1.0720623 | 1.1868907  | 1.2489908  |             |                |
| DM03250P3  | 0.17752326 | -1.0790452 | -1.1948321 | -1.0869097 | EIF4        | XM_001270834.1 |
| DM08778P1  | 0.17752984 | 1.1352984  | -1.0103594 | -1.144803  |             |                |
| DM05276P3  | 0.17753524 | -1.2309228 | -1.1583    | -1.3225423 |             |                |
| DM09889P3  | 0.17756031 | -1.1231534 | 1.1226522  | -1.1096767 | LOC10021270 | XM_002156748.1 |
| DM09796P4  | 0.17765665 | 1.0766679  | -1.5922192 | -1.1442817 |             |                |
| DM12628P2  | 0.17766935 | -1.7364371 | 1.0294197  | -1.2766461 |             |                |
| DM09407P4  | 0.17769034 | 1.2217345  | 1.2454503  | 1.1754081  |             |                |
| DM09486P1  | 0.17769924 | -1.246916  | 1.1189076  | 1.0600573  |             |                |
| DM00346P1  | 0.17770034 | -1.1191157 | 1.0613204  | -1.1353598 | LOC1002090  | XM_002161137.1 |
| DM06804P1  | 0.17774683 | -1.1988808 | -1.1260035 | 1.0126432  |             |                |
| DM06969P1  | 0.17776243 | 1.4929334  | 1.3746299  | 1.5107343  |             |                |
| DM03499P1  | 0.17776933 | 1.0300506  | 1.0987945  | -1.1261922 |             |                |
| DM08857P2  | 0.17795032 | 1.1754729  | 1.173552   | 1.1096219  |             |                |
| DM08095P1  | 0.17802191 | -1.139477  | 1.049289   | 1.1313802  |             |                |
| DM12837P3  | 0.17806055 | -1.0521276 | -1.5422472 | -1.224132  |             |                |
| DM14431P2  | 0.17807417 | -1.4256929 | -1.0247203 | -1.0960549 |             |                |
| DM01573P3  | 0.17813557 | -1.1033953 | -1.1079154 | 1.0092894  | PDI         | XM_001649725.1 |
| DM11004P1  | 0.1781475  | 1.1296811  | -1.0097659 | -1.2380579 |             |                |
| DM03232P4  | 0.17818345 | -1.4682497 | -1.2403166 | -1.3352026 | DANA\GF107  | XM_001958052.1 |
| DM02040P3  | 0.17818476 | -1.1963092 | -1.110274  | -1.1255631 | RPL12-1     | NM_001022914.1 |
| DM00727P1  | 0.17823055 | -1.1585276 | 1.0341073  | -1.0965089 | DANA\GF1510 | XM_001961677.1 |
| DM14017P1  | 0.17832157 | -1.1424648 | -1.1239204 | -1.1104072 |             |                |
| DM06810P2  | 0.17843328 | -1.4477239 | 1.0595143  | -1.0139288 |             |                |
| DM05852P1  | 0.17846659 | 1.2491171  | 1.111439   | -1.0279033 |             |                |
| DM11885P1  | 0.17847872 | 1.2512265  | 1.4663463  | 1.2552824  |             |                |
| DM01629P2  | 0.17852819 | -1.0470817 | -1.1707207 | -1.0966178 | COX411      | NM_001172340.1 |
| DM05691P3  | 0.1785874  | 1.0760069  | 1.0013944  | 1.1663088  |             |                |
| DM00207P1  | 0.1786378  | 1.1139888  | 1.0015464  | -1.0516934 | LOC1001643  | XM_001945605.1 |
| DM02716P2  | 0.17868057 | -1.0713739 | 1.0791525  | -1.181556  | UBE2C       | XM_543022.2    |

|           |            |            |            |            |             |                |
|-----------|------------|------------|------------|------------|-------------|----------------|
| DM02252P3 | 0.17878774 | -1.1815162 | -1.0886861 | -1.4311924 | PRKCI       | NM_001031319.1 |
| DM07194P4 | 0.17894483 | 1.0274565  | -1.0846953 | 1.9419329  |             |                |
| DM04573P1 | 0.17898232 | -1.1123753 | -1.1436037 | -1.229516  | BRAFLDRAFT  | XM_002595166.1 |
| DM00202P4 | 0.1789953  | -1.1585495 | 1.0512011  | -1.3021419 | RNF31       | XM_396907.3    |
| DM13955P1 | 0.17902867 | -1.2437375 | -1.7981931 | 1.9818014  |             |                |
| DM04722P3 | 0.17907706 | 1.1454997  | -1.0059288 | -1.1249467 |             |                |
| DM14510P2 | 0.17910251 | -1.0351669 | 1.1424831  | 1.3483703  |             |                |
| DM12400P2 | 0.17914648 | -1.1790273 | -1.416214  | 1.4054861  |             |                |
| DM06679P1 | 0.17915061 | 1.2481483  | 1.0221906  | 1.0471848  |             |                |
| DM03421P1 | 0.17919509 | -1.0019788 | 1.0363032  | -1.1925309 |             |                |
| DM11744P2 | 0.1792723  | 1.0108356  | -1.0003558 | -1.1617467 |             |                |
| DM02492P2 | 0.17943616 | -1.2175174 | -1.3025194 | -1.3803803 |             |                |
| DM00183P1 | 0.17946024 | 1.0924424  | 1.0129611  | 1.2066896  | DVIR\GJ1887 | XM_002059426.1 |
| DM14920P1 | 0.1795051  | 1.8918647  | 3.7110744  | 1.9292144  |             |                |
| DM09653P2 | 0.1795321  | -1.139987  | 1.0975221  | 1.411304   |             |                |
| DM01314P1 | 0.17957918 | -1.1445805 | 1.0880132  | -1.0644221 |             |                |
| DM07492P4 | 0.17962636 | 1.1995724  | 1.6006263  | 1.3199848  |             |                |
| DM07962P1 | 0.17966348 | -1.1148214 | -1.0166526 | 1.1258794  |             |                |
| DM02879P1 | 0.17967054 | 1.0091429  | 1.1121911  | -1.2489064 | CCT4        | NM_001038194.1 |
| DM02703P2 | 0.17975366 | -1.0457308 | -1.0418317 | -1.2114273 | BC1G_16081  | XM_001545361.1 |
| DM06456P3 | 0.17976113 | -1.2241293 | -1.4229683 | 1.3465902  |             |                |
| DM11892P1 | 0.1798145  | -1.0983617 | -1.070847  | 1.3161939  | AGAP_AGAP0  | XM_001688343.1 |
| DM10851P1 | 0.1798359  | -1.0677044 | -1.1132147 | -1.491959  |             |                |
| DM14926P2 | 0.17995472 | -1.233634  | -1.3599927 | -1.1431873 |             |                |
| DM02644P3 | 0.17995696 | -1.053565  | 1.0466521  | -1.153488  |             |                |
| DM05529P3 | 0.18000816 | 1.3356338  | 1.0382388  | 1.1900984  |             |                |
| DM02056P3 | 0.18004128 | -1.005917  | -1.2818052 | -1.0718032 | DVIR\GJ2311 | XM_002053810.1 |
| DM14190P1 | 0.18007615 | 1.0355333  | 1.1896267  | 1.246941   |             |                |
| DM12866P1 | 0.1801103  | -1.0233232 | 1.1304559  | -1.0459967 |             |                |
| DM07320P4 | 0.18029055 | -1.163074  | -1.219459  | 1.3106105  |             |                |
| DM03633P3 | 0.18029308 | -1.0589067 | 1.0212522  | -1.1893345 |             |                |
| DM03886P1 | 0.1803473  | 1.0933114  | 1.0867275  | 1.1481893  | LOC1001595  | XM_001946434.1 |
| DM10554P1 | 0.18038128 | 1.0451236  | 1.3660834  | 1.368241   |             |                |
| DM09588P3 | 0.18039191 | 1.326393   | 1.1374018  | 1.2274693  |             |                |
| DM00053P1 | 0.1804083  | -1.0698193 | -1.0673629 | -1.12388   | STRN3       | NM_001172098.1 |
| DM09156P2 | 0.18043339 | -1.0742605 | 1.0434006  | 1.106577   |             |                |
| DM08935P1 | 0.1804509  | -1.0351    | 1.220117   | -1.0911502 |             |                |
| DM15300P4 | 0.18046841 | -1.1146231 | 1.0736604  | -1.1151978 |             |                |
| DM02625P2 | 0.18050343 | 1.0014328  | -1.2805278 | -1.0629998 | DERE\GG247  | XM_001968184.1 |
| DM08077P2 | 0.18061036 | 1.0904129  | 1.2367009  | 1.21333    |             |                |
| DM01020P2 | 0.18062231 | 1.0102719  | -1.1134809 | 1.1078877  | LOC588493   | XM_788174.2    |
| DM01807P3 | 0.18063487 | -1.0046741 | -1.1335403 | -1.1972109 | DLD         | NM_001087425.1 |
| DM11304P1 | 0.18069129 | -1.0826076 | -1.048523  | -1.235228  |             |                |
| DM03253P1 | 0.18081625 | -1.1640352 | -1.1490617 | -1.1618559 |             |                |
| DM12585P2 | 0.18081756 | -1.2140379 | -1.7807411 | 1.38419    |             |                |
| DM01763P4 | 0.18083915 | -1.2780197 | -1.7161304 | -1.6695622 |             |                |
| DM09074P1 | 0.18088873 | -1.0056692 | 1.1235614  | 1.1063349  |             |                |
| DM02678P2 | 0.18096906 | -1.2235509 | -1.0942117 | 1.1961056  | NEMVEDRAFT  | XM_001621428.1 |
| DM03400P2 | 0.18097028 | -1.0553077 | -1.1920351 | 1.0694538  | DYAK\GE217  | XM_002094270.1 |
| DM05147P2 | 0.18097585 | 1.254601   | -1.0161657 | -1.0067632 |             |                |

|           |            |            |            |            |                            |
|-----------|------------|------------|------------|------------|----------------------------|
| DM13835P1 | 0.18100202 | 1.0932289  | 1.4952754  | 1.1705364  |                            |
| DM12795P2 | 0.18101227 | 1.0207262  | -1.0282382 | -1.1592152 |                            |
| DM14643P3 | 0.18105803 | 1.000969   | -1.2225841 | -1.124872  |                            |
| DM08493P1 | 0.18108664 | -1.1532625 | -1.1954511 | 1.0757829  |                            |
| DM06267P1 | 0.18125874 | 1.2262137  | 1.0904399  | 1.0260881  |                            |
| DM00935P3 | 0.18126015 | 1.2455224  | 1.1558275  | 1.3082277  | DVIR\GJ2151 XM_002049262.1 |
| DM08267P3 | 0.18130688 | -1.0745779 | 1.0003912  | -1.1844826 |                            |
| DM03932P3 | 0.18136764 | 1.0536115  | -1.04027   | 1.7104486  |                            |
| DM11177P2 | 0.181495   | 1.0078884  | -1.0448635 | -1.2804672 |                            |
| DM05190P4 | 0.18154106 | -1.0257534 | -1.417083  | 1.4187812  |                            |
| DM04271P3 | 0.18161733 | -1.0856988 | 1.036797   | -1.2101496 |                            |
| DM11573P3 | 0.18163575 | -1.0255277 | -1.7791348 | 1.3605279  |                            |
| DM03213P4 | 0.18163607 | 1.18653    | 1.1978302  | -1.1279523 |                            |
| DM07250P1 | 0.1816799  | -1.0952508 | -2.0926256 | -1.1874837 |                            |
| DM07928P1 | 0.18179156 | -1.0353675 | -1.4792567 | -1.1081706 |                            |
| DM06943P3 | 0.1818444  | -1.030294  | 1.1319714  | -1.2418481 | DPER\GL258 XM_002018569.1  |
| DM05336P3 | 0.18187077 | -1.0358497 | 1.125394   | -1.091225  |                            |
| DM03477P3 | 0.18198252 | 1.2207017  | 1.6289389  | 1.1222833  | BRAFLDRAFT XM_002604843.1  |
| DM07275P2 | 0.18202072 | -1.0711213 | -1.1496304 | 1.1117271  |                            |
| DM02768P1 | 0.18213846 | -1.0600785 | 1.0177264  | 1.0893103  | RPS24 XM_001649929.1       |
| DM14793P1 | 0.18214539 | 1.0662209  | 1.0418745  | 1.1254945  |                            |
| DM10895P1 | 0.18221769 | 1.1984535  | 1.113127   | -1.1201272 |                            |
| DM14198P1 | 0.1823145  | -1.0193288 | 1.0571836  | 1.1639136  |                            |
| DM00513P1 | 0.18237807 | 1.0335785  | 1.0894055  | -1.2150815 | RBBP5 NM_001030509.1       |
| DM06090P3 | 0.18241768 | 1.0732323  | 1.0136476  | -1.0974973 | DMOJ\GI208 XM_002006021.1  |
| DM03163P1 | 0.1825021  | -1.03649   | -1.1010875 | -1.2057405 | BRAFLDRAFT XM_002606627.1  |
| DM02440P1 | 0.1825108  | 1.0370275  | -1.213854  | 1.3282881  |                            |
| DM03322P2 | 0.18265197 | -1.0697834 | -1.0101347 | 1.0795339  | LOC692867 NM_001046712.1   |
| DM15073P2 | 0.18267936 | -1.0714276 | 1.034044   | -1.2556427 |                            |
| DM01714P2 | 0.18270633 | 1.0199131  | 1.1100268  | 1.0772607  | LOC1002279 XM_002198001.1  |
| DM06613P3 | 0.18273464 | -1.1013839 | -1.2980819 | -1.1423764 | LOC663751 XM_969786.1      |
| DM11759P2 | 0.18280488 | 1.0122154  | 1.0940766  | -1.112667  |                            |
| DM08457P1 | 0.18283811 | -1.1161457 | -1.0328395 | -1.269549  |                            |
| DM15249P2 | 0.1828599  | -1.209826  | 1.0726651  | 1.0218118  |                            |
| DM02812P2 | 0.1828604  | -1.0593332 | -1.0897688 | -1.192509  | LOC1001655 XM_001943159.1  |
| DM06664P3 | 0.18290828 | 1.0326233  | -1.4934659 | 1.3021157  |                            |
| DM04674P2 | 0.18292075 | -1.0647839 | 1.090637   | -1.0887766 | WDR5 NM_052821.3           |
| DM03158P2 | 0.1829628  | 1.0857351  | 1.2023476  | -1.0368112 | DWIL\GK226 XM_002072051.1  |
| DM04759P2 | 0.18308635 | -1.0820295 | 1.0841196  | -1.1443465 |                            |
| DM05894P4 | 0.18312454 | -1.4785192 | -1.6383383 | 2.3645122  |                            |
| DM00541P3 | 0.18314123 | 1.0674996  | 1.0924366  | -1.0770495 | LOC1000691 XR_044671.1     |
| DM09701P3 | 0.18320923 | -1.1572413 | -1.0678972 | -1.5829495 |                            |
| DM11678P3 | 0.18321446 | 1.1443046  | 1.0691992  | 1.0310627  |                            |
| DM07033P1 | 0.18327582 | -1.1815672 | 1.0195458  | 1.2484905  |                            |
| DM06814P3 | 0.18345222 | 1.1022918  | -3.2556293 | -1.0466707 |                            |
| DM14050P4 | 0.18370233 | 1.3579426  | 1.1241479  | 1.2775245  |                            |
| DM14692P3 | 0.1838082  | -1.1411752 | -1.0748191 | 1.1282375  |                            |
| DM09083P2 | 0.18386653 | -1.0248786 | -1.0614302 | -1.1467786 |                            |
| DM03519P1 | 0.18394102 | 1.1606115  | 1.0571855  | 1.3322127  | DYAK\GE244 XM_002097411.1  |
| DM00581P4 | 0.1839666  | 1.1980509  | 1.1149915  | 1.2746041  | AAEL_AAELoc XM_001650836.1 |

|           |            |            |            |            |                           |
|-----------|------------|------------|------------|------------|---------------------------|
| DM11751P1 | 0.18403013 | 1.0187012  | -1.1378164 | 1.1778742  |                           |
| DM14932P2 | 0.18403783 | -1.0589131 | -1.1270307 | -1.1517495 |                           |
| DM00371P3 | 0.18412359 | 1.1220922  | 1.0260748  | -1.0480857 | DERE\GG132 XM_001973639.1 |
| DM04520P1 | 0.18414971 | -1.002951  | -1.1624978 | -1.1084223 | DYAK\GE115 XM_002092663.1 |
| DM11684P1 | 0.18425988 | 1.0565572  | -1.0022405 | -1.2954317 |                           |
| DM13205P2 | 0.18432337 | -1.307534  | -1.1107582 | -1.0940202 |                           |
| DM13480P1 | 0.18433306 | -1.0409557 | -1.294201  | 1.2048326  |                           |
| DM00806P2 | 0.18442354 | -1.0306435 | -1.0236974 | -1.1294271 | DWIL\GK246 XM_002066643.1 |
| DM07692P2 | 0.1844292  | -1.088817  | 1.0866266  | -1.1876795 |                           |
| DM02319P2 | 0.18446556 | -1.1479963 | -1.141854  | 1.0331597  |                           |
| DM07578P1 | 0.18450923 | -1.0406824 | -1.2128471 | -1.3050821 | TRIADDRAFT XM_002108999.1 |
| DM08886P1 | 0.18462442 | 1.2762502  | 1.4454314  | 1.6435636  |                           |
| DM08550P2 | 0.18485115 | -1.0987284 | 1.076839   | -1.1522735 |                           |
| DM07674P3 | 0.18491295 | 1.0431104  | -1.1703106 | 1.048038   |                           |
| DM02695P3 | 0.18495215 | -1.2624135 | -1.0298116 | 1.2814126  |                           |
| DM04758P1 | 0.18501058 | -1.1643509 | 1.0554647  | 1.2030816  | POPTRDRAFT XM_002337658.1 |
| DM04408P1 | 0.18503515 | -1.2675133 | 1.0874758  | -1.3773041 |                           |
| DM14477P2 | 0.18504073 | -1.1293641 | -1.0153936 | 1.2179534  |                           |
| DM01353P1 | 0.18512736 | -1.097632  | -1.0510333 | -1.218477  | LOC552334 XM_624710.2     |
| DM07092P1 | 0.1851347  | -1.0436579 | -1.0638542 | -1.131196  |                           |
| DM00809P1 | 0.1854402  | -1.1013567 | -1.0187827 | 1.0489526  | DANA\GF138 XM_001961354.1 |
| DM00235P1 | 0.18546595 | -1.0711442 | -1.0508051 | -1.2045603 | E2I NM_001162707.1        |
| DM04247P2 | 0.18551528 | -1.0675339 | 1.0514574  | -1.21722   |                           |
| DM08379P1 | 0.18552656 | 1.3726641  | 1.1144007  | -1.04336   |                           |
| DM13507P4 | 0.18559909 | -1.3823456 | -1.0951196 | -1.1024637 |                           |
| DM05885P1 | 0.18562797 | -1.0531588 | 1.0023623  | -1.132586  | ADI XM_001649849.1        |
| DM02267P1 | 0.18572891 | 1.085272   | 1.2079444  | 1.0137303  | AGAP_AGAP0 XM_319206.4    |
| DM14832P4 | 0.18578462 | -1.0239719 | 1.0769663  | 1.2523205  |                           |
| DM10000P3 | 0.18579176 | 1.1063769  | -1.0259855 | -1.031158  |                           |
| DM12365P3 | 0.1858532  | 1.0847839  | -3.6139958 | -1.3304142 |                           |
| DM14153P4 | 0.18589474 | -1.1572099 | 1.1038498  | 1.073391   |                           |
| DM01967P3 | 0.18589546 | -1.070651  | -1.0363829 | -1.1119009 | HSDL2 NM_001104963.1      |
| DM06499P3 | 0.18589951 | 1.0066961  | -1.0017642 | 1.4805387  |                           |
| DM04154P1 | 0.185922   | 1.0636955  | 1.1341528  | -1.1720471 |                           |
| DM06417P3 | 0.18599506 | -1.1404907 | -1.3026216 | 1.6894753  |                           |
| DM12396P1 | 0.18601756 | -1.2808503 | -1.2343645 | -1.284864  |                           |
| DM03186P1 | 0.18616596 | -1.0796952 | -1.1379299 | -1.0077769 | LOC1001161 XM_001600658.1 |
| DM01267P2 | 0.18621513 | -1.174012  | -1.1428748 | -1.2485845 | SEC13 NM_001006978.1      |
| DM00690P1 | 0.18624513 | -1.1123744 | -1.1303914 | -1.0483667 | MYO6 NM_001104536.1       |
| DM09106P4 | 0.18632847 | -1.0496483 | -1.0763242 | -1.2514831 |                           |
| DM07024P2 | 0.1864136  | 1.1813962  | 1.0411762  | -1.0516495 |                           |
| DM13826P3 | 0.18643479 | 1.0590309  | 1.1362997  | 1.2804399  |                           |
| DM10815P1 | 0.18648662 | -1.122619  | -1.0537955 | -1.1622927 | TCEA1 NM_001025735.1      |
| DM12698P1 | 0.1865872  | -1.1357921 | 1.159121   | -1.1120899 |                           |
| DM12683P3 | 0.1866821  | 1.0840033  | 1.1382024  | -1.2415111 |                           |
| DM00224P4 | 0.18674782 | 1.0387214  | 1.0652499  | -1.027328  | LOC1001675 XM_001945779.1 |
| DM04633P3 | 0.18675728 | 1.1365463  | -1.2105194 | -1.2675915 | MRT4 XM_001652253.1       |
| DM14136P1 | 0.18679774 | 1.1544445  | -1.1924026 | 1.2343359  | DANA\GF220 XM_001966256.1 |
| DM01472P1 | 0.18681511 | 1.062438   | -1.0142332 | -1.1048203 | DGR1\GH165 XM_001984628.1 |
| DM12286P4 | 0.18682146 | -1.0330197 | 1.106252   | -1.1506822 |                           |

|           |            |            |            |            |                           |
|-----------|------------|------------|------------|------------|---------------------------|
| DM10735P3 | 0.18689834 | 1.03659    | -1.0199833 | 1.1131103  |                           |
| DM06842P2 | 0.18693736 | -1.0608777 | 1.1264886  | 1.1389233  | LOC1000929!XM_001521392.1 |
| DM14208P1 | 0.18694258 | -1.2378411 | 1.1078637  | -1.2567294 |                           |
| DM09272P1 | 0.18695663 | -1.0123397 | 1.088209   | 1.2263824  |                           |
| DM06665P1 | 0.18698764 | -1.0197921 | -1.2912016 | 1.4075822  |                           |
| DM02197P1 | 0.18702148 | -1.0034611 | -1.0344769 | -1.047229  | DANA\GF165!XM_001954702.1 |
| DM02888P2 | 0.18704261 | 1.304176   | 1.6372739  | 1.3756659  | DSEC\GM184 XM_002037774.1 |
| DM13101P3 | 0.18707553 | -1.2899913 | 1.0765741  | 1.0191102  |                           |
| DM12437P2 | 0.18710406 | 1.2970928  | 1.5543066  | 1.3180679  |                           |
| DM07451P2 | 0.18710499 | -1.0129892 | 1.1244164  | 1.0760944  |                           |
| DM09988P1 | 0.18714541 | -1.2417159 | 1.0468742  | -1.1115386 |                           |
| DM03410P1 | 0.18715405 | -1.0743467 | -1.4537703 | 1.3929701  | ISCW_ISCWC XM_002402345.1 |
| DM05146P2 | 0.1872643  | 1.048713   | 1.0508306  | -1.1185471 |                           |
| DM04570P3 | 0.18727711 | 1.194713   | 1.5393647  | 1.2968526  |                           |
| DM13927P3 | 0.18734956 | -1.0038785 | 1.0805     | -1.1105807 |                           |
| DM03746P4 | 0.18737729 | -1.0186166 | 1.1219327  | -1.0133837 | SNAP NM_001161944.1       |
| DM05748P2 | 0.18740086 | 1.2879288  | 1.5590256  | 1.2204446  |                           |
| DM07533P1 | 0.18740441 | -1.2696267 | -1.1773906 | -1.1736839 | LOC1001139:XM_001606456.1 |
| DM10314P1 | 0.1874186  | 1.2371544  | 1.1251538  | 1.1807193  |                           |
| DM06609P4 | 0.18746187 | 1.2091423  | 1.1840479  | 1.1270652  |                           |
| DM11363P4 | 0.18747616 | 2.007914   | -1.0376707 | 1.6570017  |                           |
| DM10606P4 | 0.18758112 | 1.0164796  | -1.1351945 | 1.7546163  |                           |
| DM10862P1 | 0.18759073 | 1.0571601  | 1.19898    | -1.1488688 |                           |
| DM04342P3 | 0.18761943 | -1.0581825 | -1.060813  | -1.2358674 | LOC659968 XM_966232.2     |
| DM12461P1 | 0.18771026 | 1.2853311  | 1.2040173  | 1.0575713  |                           |
| DM04861P2 | 0.18774053 | 1.03586    | 1.0297884  | -1.1441518 | LOC551838 XM_624223.1     |
| DM12526P1 | 0.18796717 | -1.0591288 | 1.0715425  | 1.0905885  |                           |
| DM06563P4 | 0.18800385 | 1.0619688  | 1.2061764  | 1.2656429  |                           |
| DM03375P1 | 0.18801682 | -1.0015621 | -1.074239  | 1.0382717  |                           |
| DM11616P1 | 0.18819922 | -1.1192352 | -1.3468473 | -1.120631  |                           |
| DM09912P3 | 0.18825574 | 1.1788616  | 1.0694954  | -1.1165446 |                           |
| DM13410P3 | 0.18837225 | -1.1877993 | -1.0194818 | -1.3186535 |                           |
| DM09011P2 | 0.18852863 | -1.0627345 | -1.1702499 | -1.0809318 | DWIL\GK128!XM_002074059.1 |
| DM11470P3 | 0.18853492 | 1.0811425  | 1.0242856  | -1.2705897 |                           |
| DM10647P3 | 0.18859255 | 1.2158079  | 1.2669543  | -1.1736572 |                           |
| DM02140P2 | 0.18887874 | 1.1202257  | 1.1010358  | 1.2685256  | LOC1001659:XM_001952676.1 |
| DM13194P1 | 0.1889691  | -1.0952036 | 1.099647   | 1.0089198  | LOC1000822!XM_001512905.1 |
| DM11905P3 | 0.18901645 | -1.055634  | 1.2692162  | 1.0656449  |                           |
| DM01318P1 | 0.18902884 | -1.0249722 | -1.2833802 | 1.1410669  | SEC14L4 NM_001161368.1    |
| DM12737P2 | 0.18907283 | -1.0165269 | -1.2584475 | 1.2352251  |                           |
| DM13502P2 | 0.1891409  | 1.1924978  | 1.1538128  | 1.0238947  |                           |
| DM12785P2 | 0.18922095 | 1.2649248  | -1.1515708 | 1.031201   |                           |
| DM08503P1 | 0.1893209  | 1.1441156  | -1.3192666 | -1.2958672 |                           |
| DM08156P2 | 0.18932407 | -1.0512736 | -1.2145765 | -1.1536554 |                           |
| DM11081P4 | 0.1894085  | 1.0189761  | -1.0002487 | 1.2208747  |                           |
| DM09977P2 | 0.18948801 | 1.148378   | 1.1692822  | -1.0462528 |                           |
| DM13599P2 | 0.18971987 | 1.1764017  | 1.2813883  | 1.5681129  |                           |
| DM14195P1 | 0.18976106 | 1.1028192  | 1.275172   | 1.3405049  | DCL3 XM_001692384.1       |
| DM01657P4 | 0.18983878 | -1.0928227 | 1.0309302  | 1.1565671  | DSIM\GD236 XM_002078845.1 |
| DM12976P3 | 0.18985206 | -1.4748226 | -1.1524763 | 1.1532533  |                           |

|           |            |            |            |            |                           |
|-----------|------------|------------|------------|------------|---------------------------|
| DM02544P3 | 0.1899683  | -1.2170608 | -1.0805693 | 1.178143   | LOC1001671(XM_001944043.1 |
| DM00460P2 | 0.1901292  | 1.0991243  | -1.1438901 | 1.070774   | DSEC\GM137 XM_002043924.1 |
| DM01572P1 | 0.19013438 | -1.2111229 | -1.057298  | 1.2157991  | RPS24 XM_001649929.1      |
| DM07821P2 | 0.19013776 | 1.7950598  | 3.832207   | 1.9779353  |                           |
| DM15297P2 | 0.19016613 | -1.3546813 | 1.0856713  | -1.0580477 |                           |
| DM04013P2 | 0.19024062 | -1.1323198 | -1.1222986 | -1.085342  |                           |
| DM12904P1 | 0.1903201  | 1.0799527  | -1.9723101 | -1.0584351 |                           |
| DM07148P1 | 0.19039875 | 1.1221051  | 1.0505373  | -1.2132455 |                           |
| DM12337P3 | 0.19050343 | 1.0541818  | 1.6466134  | -1.191785  |                           |
| DM02837P2 | 0.19054464 | 1.2275414  | -1.413254  | 1.8448254  | COL1A1 NM_001034039.1     |
| DM10417P2 | 0.19057876 | 1.0817777  | 1.1006559  | 1.3771814  |                           |
| DM08003P2 | 0.19058152 | -1.2228041 | -1.3096538 | 1.3183182  |                           |
| DM13484P3 | 0.1906222  | -1.4406158 | -1.9132785 | -1.1316621 |                           |
| DM05467P2 | 0.19065803 | 1.2166772  | -1.0708405 | 1.0159191  |                           |
| DM04786P2 | 0.19066544 | 1.0296677  | -1.107666  | 1.0083989  |                           |
| DM09661P3 | 0.19070148 | 1.0863233  | 1.0058107  | -1.1139622 |                           |
| DM13787P2 | 0.19074653 | -1.0005957 | 1.1724547  | 1.1959517  |                           |
| DM08383P1 | 0.19088362 | -1.2923017 | 1.1269368  | 1.0225446  |                           |
| DM09116P3 | 0.19089918 | -1.0968977 | 1.1262106  | 1.098234   |                           |
| DM05133P2 | 0.1909031  | 1.082332   | 1.0302641  | -1.1260823 |                           |
| DM01684P3 | 0.1911448  | 1.0840954  | -1.075035  | 1.1437228  | PRKD1 XM_001662623.1      |
| DM10050P3 | 0.19127692 | -1.065593  | 1.0131646  | -1.210017  |                           |
| DM11547P1 | 0.19139151 | 1.1291233  | 1.0463308  | 1.0169903  |                           |
| DM00038P2 | 0.19139703 | -1.0678576 | 1.0025444  | -1.1297884 | NSA2 NM_001034546.1       |
| DM08819P1 | 0.19151773 | -1.1385365 | -1.0650628 | -1.1549239 |                           |
| DM07793P1 | 0.19162247 | 1.4169354  | -2.3495796 | 1.438682   |                           |
| DM06280P2 | 0.19163965 | -1.2898316 | 1.1540319  | 1.20496    |                           |
| DM08575P1 | 0.19170982 | -1.2280269 | -1.0660883 | 1.6184704  |                           |
| DM14049P1 | 0.19171768 | 1.0062696  | 1.1064869  | -1.0021262 |                           |
| DM05592P1 | 0.1917352  | 1.0139474  | -1.3223528 | -1.0460668 |                           |
| DM03360P2 | 0.19175282 | -1.120692  | 1.0323336  | 1.1745509  | PPP2CA NM_203943.1        |
| DM05546P3 | 0.19185767 | -1.182709  | -1.4956865 | -1.2703271 |                           |
| DM14743P1 | 0.19188306 | -1.038744  | 1.0266075  | -1.2211922 |                           |
| DM10539P4 | 0.19201642 | -1.2527821 | -1.0373966 | 1.1535953  |                           |
| DM09681P1 | 0.19204046 | -1.1647924 | -1.0136046 | -1.8772022 |                           |
| DM09963P1 | 0.19204938 | -1.0839232 | 1.1175169  | -1.1409578 |                           |
| DM15210P1 | 0.19205077 | 1.0001729  | -2.154017  | 1.0589027  |                           |
| DM06447P2 | 0.19206311 | 1.25539    | 1.2125401  | 1.1637808  |                           |
| DM14338P2 | 0.19206448 | -1.251636  | -1.1360472 | 1.0002189  |                           |
| DM10126P1 | 0.19212031 | 1.13273    | 1.3027256  | 1.1763322  |                           |
| DM02813P3 | 0.19224477 | 1.3642391  | 1.4018898  | 1.135509   |                           |
| DM03087P2 | 0.19228606 | -1.1279402 | 1.105141   | 1.1101446  | CRL XM_968596.1           |
| DM02287P2 | 0.1923163  | 1.372173   | 1.1582264  | -1.1319883 | LOC1000681(XM_001498073.2 |
| DM08705P2 | 0.19231991 | 1.060885   | -1.0328661 | 1.1388451  |                           |
| DM14752P1 | 0.19249049 | 1.117556   | -1.1043235 | 1.6662419  |                           |
| DM07291P1 | 0.1925398  | 1.0007623  | 1.1394273  | 1.2971644  |                           |
| DM07121P3 | 0.19261375 | 1.1358876  | -1.6264062 | 1.2454079  |                           |
| DM06070P2 | 0.19275008 | -1.0986146 | -1.5522969 | -1.7729484 |                           |
| DM07924P1 | 0.19280362 | -1.2862341 | -1.047238  | -1.0171272 |                           |
| DM08834P1 | 0.1928193  | -1.2995895 | -1.0084038 | 1.1824391  |                           |

|           |            |            |            |            |              |                |
|-----------|------------|------------|------------|------------|--------------|----------------|
| DM04602P1 | 0.19299951 | -1.2468665 | -1.167908  | -1.0417273 | NDUFB8       | NM_001162698.1 |
| DM01350P3 | 0.19301316 | -1.0874273 | 1.0223429  | -1.1629546 |              |                |
| DM14676P2 | 0.1931587  | 1.0080855  | -1.53889   | 1.3248801  |              |                |
| DM04887P2 | 0.19317387 | -1.0007267 | -1.021683  | -1.1075283 | LOC1002216   | XM_002189422.1 |
| DM06253P2 | 0.19334973 | -1.1619875 | -1.1207433 | -1.3804041 |              |                |
| DM11806P4 | 0.1934096  | -1.1378572 | 1.0987897  | -1.2438035 |              |                |
| DM02010P3 | 0.19358662 | -1.3812331 | -1.115352  | -1.2267742 |              |                |
| DM12485P1 | 0.19358854 | 1.12977    | 1.0058143  | 1.1895859  |              |                |
| DM04315P3 | 0.1937343  | 1.8840449  | 1.0702184  | -1.3772813 |              |                |
| DM05713P2 | 0.19373602 | 1.2076832  | -1.2284092 | -1.160039  |              |                |
| DM13832P2 | 0.19377767 | 1.4413179  | -1.0937755 | 1.5676119  |              |                |
| DM10339P4 | 0.19385445 | -1.1279496 | 1.0699825  | 1.0799054  |              |                |
| DM11838P1 | 0.19429109 | -1.039172  | -1.4484861 | -1.0276326 |              |                |
| DM02736P1 | 0.19444028 | 1.0782181  | 1.0377473  | -1.0514208 |              |                |
| DM08932P3 | 0.1945685  | 1.3077232  | 1.0116574  | 1.2076524  |              |                |
| DM02363P3 | 0.19459923 | -1.1095916 | 1.0271584  | -1.1189562 | LOC585260    | XM_001176062.1 |
| DM00454P3 | 0.19462393 | 1.0771387  | -1.0387564 | -1.0873934 | LOC1002140   | XM_002154219.1 |
| DM05617P3 | 0.19463651 | -1.1659681 | -1.1468247 | -1.083758  |              |                |
| DM05922P2 | 0.19472528 | -1.0972115 | 1.0087612  | -1.2075752 | RFC4         | NM_001006550.1 |
| DM04767P3 | 0.19476634 | 1.529862   | 1.7101434  | -1.0200512 |              |                |
| DM10011P4 | 0.19496498 | 1.0202724  | -1.0851923 | 1.2108856  |              |                |
| DM04772P3 | 0.19498134 | 1.2837694  | -2.080798  | 1.2769631  |              |                |
| DM06745P1 | 0.1949935  | -1.0435276 | -1.2517544 | -1.0960994 |              |                |
| DM10497P3 | 0.19503051 | 1.1401861  | 1.3089658  | -1.3231493 |              |                |
| DM08208P3 | 0.19505365 | 1.1573256  | 1.0207707  | -1.0628314 |              |                |
| DM08030P2 | 0.19507109 | 1.5010893  | -2.1677356 | 1.5909135  |              |                |
| DM04303P3 | 0.19513902 | -2.2772539 | -1.663753  | -1.4062726 |              |                |
| DM01355P4 | 0.19518274 | -1.073537  | -1.062509  | -1.2205173 |              |                |
| DM00847P2 | 0.19519459 | -1.157699  | -1.0561731 | -1.234942  | LOC413299    | XM_396744.3    |
| DM10276P1 | 0.19525102 | -1.0468084 | 1.2596788  | 1.272736   |              |                |
| DM06240P1 | 0.19528107 | -1.0055345 | -1.243139  | -1.1882199 |              |                |
| DM06716P1 | 0.19531253 | -1.1499971 | 1.0258834  | -1.1759053 |              |                |
| DM07402P3 | 0.19539626 | -1.0045874 | 1.0559585  | -1.1628551 |              |                |
| DM08561P2 | 0.19547743 | 1.239387   | 1.2655215  | 1.1536071  |              |                |
| DM07271P2 | 0.19549964 | -1.1379226 | 1.0593686  | -1.1481429 |              |                |
| DM02705P1 | 0.1955197  | -1.0531812 | -1.3355387 | -1.0704172 | BRAFLDRAFT   | XM_002607560.1 |
| DM14046P1 | 0.19556035 | -1.0221267 | 1.298986   | 1.1081806  |              |                |
| DM09124P1 | 0.19560252 | -1.017027  | -1.1357492 | 1.0368354  |              |                |
| DM06315P2 | 0.19560479 | -1.2253256 | -1.221038  | -1.167926  | LOC1001448   | NM_001126156.2 |
| DM08349P2 | 0.19562949 | -1.0957264 | -1.160236  | -1.0191027 |              |                |
| DM01711P1 | 0.19566165 | 1.1066918  | 1.1629717  | -1.104758  | DANA\GF235   | XM_001958248.1 |
| DM05193P3 | 0.19591133 | 1.1411777  | -1.325993  | 1.1918889  | CPIPJ_CPIJ01 | XM_001864522.1 |
| DM06123P2 | 0.19610992 | -1.0703485 | -1.1932688 | -1.1505886 |              |                |
| DM07391P2 | 0.1961817  | 1.083504   | 1.0440742  | 1.1323088  |              |                |
| DM00058P2 | 0.19619521 | 1.1098111  | -1.0735029 | -1.0232403 | LOC1001675   | XM_001949495.1 |
| DM11455P2 | 0.19619857 | 1.0044258  | 1.0014352  | -1.2758086 |              |                |
| DM07567P1 | 0.1963486  | 1.1000535  | -1.2740288 | 1.0802     |              |                |
| DM10152P2 | 0.1963634  | 1.24652    | -1.0201025 | 1.3250092  |              |                |
| DM00535P4 | 0.19640507 | -1.098397  | 1.0232362  | 1.0502731  | TRIADDRAFT   | XM_002118332.1 |
| DM08097P3 | 0.19649848 | 1.1361866  | 1.2647305  | 1.109473   |              |                |

|           |            |            |            |            |             |                |
|-----------|------------|------------|------------|------------|-------------|----------------|
| DM02799P1 | 0.19654699 | 1.0319074  | 1.2094713  | 1.120008   | CPNE9       | NM_001102990.1 |
| DM08240P2 | 0.19661109 | 1.1594177  | -1.2770814 | 2.2506974  |             |                |
| DM05368P3 | 0.19663697 | 1.1828635  | 1.062919   | 1.1809117  |             |                |
| DM15085P2 | 0.1966868  | 1.0397648  | 1.1839223  | 1.2034216  |             |                |
| DM02116P3 | 0.19685501 | -1.1687046 | 1.0134382  | -1.1647644 | SKIV2L2     | NM_001034093.1 |
| DM01596P2 | 0.19687322 | -1.1357507 | -1.0464755 | 1.0310911  | DVIR\GJ2049 | XM_002049865.1 |
| DM12504P2 | 0.19693558 | 1.220139   | -1.331061  | 1.0459987  |             |                |
| DM09381P3 | 0.19693741 | -1.1262954 | 1.0429351  | -1.1443474 |             |                |
| DM07502P1 | 0.19696063 | 1.127618   | -1.4126807 | 1.6713817  |             |                |
| DM00085P3 | 0.19697331 | 1.1693629  | 1.067982   | -1.0772544 | DMOJ\GI1957 | XM_002004470.1 |
| DM13616P1 | 0.19704904 | -1.1902865 | 1.0504074  | 1.0905763  |             |                |
| DM11896P1 | 0.1971111  | 1.1629548  | 1.0539441  | 1.0006647  |             |                |
| DM12180P1 | 0.19719891 | -1.1208304 | 1.239541   | 1.4464643  |             |                |
| DM12066P1 | 0.19725375 | 1.0637693  | 1.0256636  | 1.3504214  |             |                |
| DM02257P3 | 0.19735594 | -1.1745175 | -1.0118042 | -1.1845845 | LOC410487   | XM_393966.1    |
| DM15211P4 | 0.19744124 | -1.1563514 | 1.2297049  | 1.2017102  |             |                |
| DM07877P1 | 0.19745243 | 1.2862178  | -2.120041  | 1.3513637  |             |                |
| DM00274P2 | 0.19745971 | -1.0627137 | -1.0803909 | -1.1738722 | LOC1001648  | XM_001943613.1 |
| DM06159P3 | 0.1974821  | -1.2327832 | -1.0260347 | -1.2297537 |             |                |
| DM04847P2 | 0.19750437 | -1.225561  | -1.3760418 | -1.2983345 |             |                |
| DM01337P3 | 0.19756232 | 1.1349686  | 1.2476286  | 1.2811549  | SPTA        | XM_001851306.1 |
| DM08607P3 | 0.19759603 | -1.0114597 | -1.0151485 | -1.1913155 |             |                |
| DM00754P4 | 0.19762027 | 1.1468514  | 1.0944393  | -1.2058605 | LOC655857   | XM_962419.2    |
| DM05962P1 | 0.1976268  | -1.10077   | 1.0350552  | -1.0944978 | LOC551690   | XM_624078.2    |
| DM07860P4 | 0.1976306  | 1.1881227  | -4.2774816 | 1.194254   |             |                |
| DM08509P4 | 0.19763158 | -1.0370474 | -2.2706215 | 1.313945   |             |                |
| DM01276P2 | 0.19763212 | 1.0413215  | 3.0031736  | -1.1843289 | ACMSD       | NM_001089494.1 |
| DM01183P1 | 0.19767682 | 1.0267121  | -1.2542591 | -1.0018475 | LOC1001679  | XR_045904.1    |
| DM05480P2 | 0.1978852  | 1.5099748  | 1.0202248  | 1.6845754  |             |                |
| DM15121P1 | 0.19795184 | -1.3855795 | -1.1878675 | 1.0458499  |             |                |
| DM14991P3 | 0.1979882  | 1.047091   | -1.0207554 | 1.1122015  |             |                |
| DM11474P3 | 0.19803482 | 1.0224144  | 1.015552   | -1.1392461 |             |                |
| DM10465P1 | 0.19808307 | -1.127252  | 1.0020328  | -1.1723951 |             |                |
| DM02651P3 | 0.19814311 | -1.115483  | 1.0003917  | 1.4018291  | DPSE\GA228  | XM_002133353.1 |
| DM10814P1 | 0.1982942  | 1.2865423  | 1.4737692  | 1.1835592  |             |                |
| DM05041P3 | 0.19833738 | -1.251196  | -1.0707902 | -1.2826467 | CPSF6       | NM_001017993.1 |
| DM04611P2 | 0.19838548 | -1.1324093 | -1.0137289 | 1.0625585  |             |                |
| DM00943P4 | 0.19857948 | 1.0233921  | -1.0038579 | -1.1566325 | DVIR\GJ1440 | XM_002058382.1 |
| DM04862P3 | 0.19858593 | -1.0699542 | -1.0412014 | -1.1196414 |             |                |
| DM08982P1 | 0.1986036  | 1.0158027  | -1.1165627 | 1.0585285  | DSIM\GD196  | XM_002102156.1 |
| DM06754P1 | 0.19863603 | -1.0919349 | -1.0135291 | -1.1032293 |             |                |
| DM12409P1 | 0.19863832 | 1.2231231  | 1.1687651  | -1.1198261 |             |                |
| DM14325P3 | 0.19865318 | 1.0345632  | 1.2535007  | 1.022117   |             |                |
| DM04286P1 | 0.19869521 | -1.1809003 | -1.3442154 | -1.2036005 | DSEC\GM190  | XM_002040240.1 |
| DM00645P2 | 0.19875005 | -1.3148725 | -1.1286248 | -1.0174005 |             |                |
| DM04700P3 | 0.19880204 | 1.0346366  | 1.1100881  | -1.0648423 |             |                |
| DM07181P1 | 0.1988439  | 1.0637592  | 1.0985913  | -1.0912282 |             |                |
| DM00405P3 | 0.19885066 | 1.1329442  | 1.1677957  | -1.0961452 | LOC412080   | XM_395546.3    |
| DM14894P1 | 0.1989626  | -1.135428  | 1.0315617  | 1.2434912  |             |                |
| DM05168P1 | 0.19907643 | 1.1675051  | 1.1741221  | 1.2847987  |             |                |



|           |            |            |            |            |                            |
|-----------|------------|------------|------------|------------|----------------------------|
| DM09918P1 | 0.19912247 | -1.004172  | 1.1956046  | 1.2070116  |                            |
| DM03376P2 | 0.19917466 | 1.0337492  | -1.1909782 | 1.114711   | AGAP_AGAP0 XM_308314.4     |
| DM06020P3 | 0.19922116 | -1.1393362 | -2.4123485 | -1.2469845 |                            |
| DM04539P4 | 0.19927064 | 1.1027671  | -1.1238054 | 1.2762024  |                            |
| DM04490P2 | 0.19931957 | 1.1785575  | 1.5541528  | 1.1979644  |                            |
| DM08203P4 | 0.19958553 | -1.3270462 | -1.263992  | -1.2056359 |                            |
| DM02488P1 | 0.19962443 | -1.0002489 | 1.0542043  | 1.0776259  |                            |
| DM09981P1 | 0.19984847 | 1.0544224  | -1.1284372 | -1.0643271 |                            |
| DM08835P1 | 0.19991046 | 1.0611912  | -1.20865   | 1.406501   |                            |
| DM00663P3 | 0.19996567 | 1.1250074  | 1.1189368  | 1.0812594  | LOC1001607 XM_001952596.1  |
| DM15062P3 | 0.20002098 | -1.5786983 | -1.2450321 | -1.519675  |                            |
| DM12205P1 | 0.20008565 | 1.0168294  | -1.2322193 | 1.0672427  |                            |
| DM01202P1 | 0.20008829 | -1.077372  | -1.1851428 | -1.1771901 | DWIL\GK161 XM_002067406.1  |
| DM07003P1 | 0.20009993 | -1.1911398 | -1.3648467 | 1.5602422  |                            |
| DM06539P2 | 0.2001387  | -1.0107058 | 1.0229084  | 1.0752854  |                            |
| DM03693P1 | 0.20016254 | -1.1569626 | -1.0918525 | -1.1920238 | BRAFLDRAFT_XM_002606646.1  |
| DM09491P3 | 0.20020187 | -1.3473152 | -1.0428836 | 1.0323305  |                            |
| DM07841P2 | 0.2002122  | 1.074536   | -1.083951  | 1.2275798  |                            |
| DM07666P2 | 0.20021307 | -1.0298389 | 1.0974824  | -1.1117927 |                            |
| DM00128P3 | 0.20026714 | 1.1127933  | 1.0474738  | -1.0045817 | PI4K2A NM_053735.1         |
| DM12176P2 | 0.20029779 | -1.1748974 | -1.2439824 | -1.301097  |                            |
| DM01545P3 | 0.20031703 | -1.2437748 | -1.2144656 | -1.2046452 |                            |
| DM09051P4 | 0.20041002 | -1.1770519 | -1.228345  | 1.1981275  |                            |
| DM05732P1 | 0.20044895 | 1.040086   | -1.1763607 | -1.1143519 |                            |
| DM01198P1 | 0.20059063 | -1.0039685 | -1.0201576 | 1.0843177  | LOC1000513 XM_001493297.1  |
| DM06530P1 | 0.20059878 | 1.142434   | 1.116863   | 1.234195   |                            |
| DM07543P2 | 0.20061891 | 1.0168624  | 1.0421877  | 1.2178372  |                            |
| DM08310P3 | 0.20069045 | 1.037001   | 1.4413086  | 1.2305474  |                            |
| DM09070P1 | 0.20069364 | -1.1427035 | -1.009206  | 1.2443675  |                            |
| DM13252P1 | 0.20072798 | -1.0817198 | -1.0192169 | -1.2109865 |                            |
| DM11914P3 | 0.20082499 | -1.1111423 | 1.0688336  | -1.1054375 |                            |
| DM14532P4 | 0.20089018 | 1.0181428  | -1.0264715 | 1.2450708  |                            |
| DM10022P3 | 0.20089163 | -1.0176365 | -1.109323  | -1.1519036 |                            |
| DM01757P2 | 0.20103706 | -1.0800384 | -1.0362666 | 1.1099274  | DMOJ\GI117 XM_002008516.1  |
| DM05018P1 | 0.20106782 | -1.0730501 | -1.0580457 | -1.1287231 |                            |
| DM02016P1 | 0.20121922 | -1.0377915 | 1.0665017  | 1.266031   |                            |
| DM01771P1 | 0.20125286 | -1.349499  | -1.2784832 | 1.0618025  | DVIR\GJ2088 XM_002049166.1 |
| DM01378P1 | 0.20129721 | 1.013624   | -1.3457794 | -1.1473278 | OSTLU_3411 XM_001416606.1  |
| DM03745P3 | 0.20140801 | 1.4602748  | 1.332352   | 1.5321003  | AAEL_AAELOC XM_001658929.1 |
| DM10014P2 | 0.20145725 | 1.2707375  | 1.2278239  | -1.0084577 |                            |
| DM00657P3 | 0.20163517 | -1.0457268 | 1.1828483  | 1.0352764  | LOC1002144 XM_002160320.1  |
| DM09399P3 | 0.20163892 | 1.0626607  | 1.2441703  | -1.1267675 |                            |
| DM00336P4 | 0.20164666 | -1.0865426 | -1.008979  | 1.1071621  | RAL XM_001862570.1         |
| DM06787P2 | 0.20167074 | -1.0513616 | -1.1975535 | 1.2193375  |                            |
| DM09022P1 | 0.20181143 | -1.1608018 | 1.0250016  | 1.1351365  |                            |
| DM09143P1 | 0.20184858 | -1.1817235 | -1.400472  | 1.1798574  |                            |
| DM02893P1 | 0.20191394 | 1.1640017  | -1.3033136 | 1.2373606  |                            |
| DM07010P1 | 0.2020696  | 1.9981391  | 1.1365719  | 3.0286765  |                            |
| DM12319P4 | 0.20208289 | 1.408288   | -1.6837782 | 1.3390635  |                            |
| DM15319P1 | 0.20208322 | -1.0710877 | 1.1547493  | 1.2236258  |                            |

|           |            |            |            |            |             |                |
|-----------|------------|------------|------------|------------|-------------|----------------|
| DM01726P4 | 0.20215991 | -1.1290923 | -1.237791  | -1.2231454 |             |                |
| DM14878P3 | 0.2023289  | 1.0122536  | 1.393913   | -1.1086177 |             |                |
| DM01561P3 | 0.2023566  | 1.0507807  | -1.0866996 | -1.0223173 | BRAFLDRAFT  | XM_002610924.1 |
| DM12752P4 | 0.2023637  | 1.2019988  | -1.1045188 | -1.3375453 |             |                |
| DM09891P1 | 0.20242442 | 1.2120174  | 1.334121   | -1.250821  |             |                |
| DM01863P1 | 0.20247827 | 1.0203437  | 1.0267428  | 1.0317427  | PHATRDRIFT  | XM_002178349.1 |
| DM14933P2 | 0.202496   | 1.0498707  | 1.3036872  | 1.0535147  |             |                |
| DM00112P1 | 0.20260578 | 1.0973866  | -1.1265825 | -1.0357423 | PLCB        | XM_001849847.1 |
| DM05086P3 | 0.20261043 | -1.0546397 | 1.0326394  | -1.0656742 | CCDC124     | NM_001016496.2 |
| DM09686P1 | 0.20270804 | 1.1611549  | 1.2333332  | 1.1669905  |             |                |
| DM09763P1 | 0.20277207 | 1.0524842  | 1.1297656  | -1.1287246 |             |                |
| DM01396P1 | 0.20280968 | -1.15004   | 1.0537411  | 1.0074729  |             |                |
| DM07558P3 | 0.20296678 | -1.1474627 | -1.188304  | -1.2798322 |             |                |
| DM11571P1 | 0.20297544 | 1.1044303  | 1.1830045  | -1.0680497 |             |                |
| DM11113P3 | 0.20298631 | -1.0150056 | 1.0084603  | -1.0961405 |             |                |
| DM12532P2 | 0.20304774 | -1.1384    | 1.0522541  | -1.2360327 |             |                |
| DM02710P3 | 0.2030804  | 1.2582155  | -2.0413566 | 1.8073542  | DWIL\GK141' | XM_002073559.1 |
| DM01981P2 | 0.20309795 | -1.0253913 | -1.0473117 | 1.1124055  | NUOF        | NM_001170834.1 |
| DM05996P3 | 0.2031183  | 1.922755   | 1.6799315  | 1.4210882  |             |                |
| DM09651P1 | 0.20318274 | 1.5721139  | 1.7462535  | 1.2793554  |             |                |
| DM06945P1 | 0.20320453 | -1.1293142 | -1.2851249 | 1.1196582  |             |                |
| DM09096P1 | 0.20336474 | -1.0454803 | 1.0485722  | -1.1389685 |             |                |
| DM06178P1 | 0.20339434 | -1.0967064 | 1.0013229  | 1.2333711  |             |                |
| DM06654P2 | 0.20343505 | 1.1186727  | 1.0565788  | -1.163146  |             |                |
| DM01334P4 | 0.20355234 | -1.1043161 | -1.079815  | -1.0092418 | AGAP_AGAP0  | XM_320365.2    |
| DM12475P4 | 0.20360522 | -1.0999883 | 1.0758039  | -1.2944583 |             |                |
| DM05174P1 | 0.20365664 | 1.091245   | 1.1791327  | -1.1182277 |             |                |
| DM12535P2 | 0.20366433 | 1.0389235  | -1.0868585 | -1.0882014 |             |                |
| DM12740P3 | 0.20373605 | 1.0014914  | 1.2456441  | -1.1302317 |             |                |
| DM15091P1 | 0.20380846 | 1.0087718  | 1.1542081  | 1.1095207  | DMOJ\GI238' | XM_001998237.1 |
| DM08266P1 | 0.20382117 | 1.267766   | 1.0230501  | 1.81706    |             |                |
| DM14840P3 | 0.20382752 | -1.1691298 | -1.3848071 | -1.0889627 |             |                |
| DM02497P3 | 0.20384869 | 1.0757965  | 1.0192302  | -1.149256  | PNP         | NM_001086340.1 |
| DM03313P2 | 0.2038946  | -1.0577018 | -1.0861422 | -1.0838088 | LOC751839   | NM_001048214.1 |
| DM07238P1 | 0.20394409 | 1.1876385  | -1.1096345 | 1.5252175  |             |                |
| DM03427P3 | 0.20407254 | 1.0592563  | 1.1656283  | 1.164222   | DERE\GG124  | XM_001982133.1 |
| DM00479P3 | 0.20408224 | -1.0889217 | -1.1504794 | -1.1915355 | LOC1000561' | XM_001501013.2 |
| DM05692P3 | 0.20410042 | -1.2131135 | -1.333437  | -1.1266625 |             |                |
| DM08639P1 | 0.20413421 | 1.3374897  | 1.4695143  | 1.5227838  |             |                |
| DM10657P4 | 0.20414649 | 1.1553612  | 1.1584625  | 1.0697266  |             |                |
| DM10073P3 | 0.20427269 | -1.3436409 | -1.0046126 | 1.031066   |             |                |
| DM09191P1 | 0.20435573 | 1.0401756  | -1.0813115 | -1.2179459 |             |                |
| DM13107P1 | 0.20436378 | 1.5235347  | -1.4236186 | -1.2366948 |             |                |
| DM11227P1 | 0.20442006 | 1.2870113  | 1.1588926  | -1.1172123 |             |                |
| DM01938P3 | 0.20448215 | -1.0906966 | -1.0642763 | 1.1340346  | LOC1001830' | XM_002130754.1 |
| DM00049P1 | 0.20479958 | -1.3596473 | -1.1916821 | -1.2811412 | DWIL\GK127' | XM_002074075.1 |
| DM11415P3 | 0.2049234  | 1.0027381  | 1.1754129  | 1.2794325  |             |                |
| DM13341P1 | 0.20511806 | 1.0124525  | -1.2687327 | -1.0156909 |             |                |
| DM02450P3 | 0.2051539  | -1.0074717 | 1.0257874  | 1.0874256  | LOC769550   | XM_001232841.1 |
| DM06921P3 | 0.20516688 | -1.2388005 | -1.2174755 | -1.146936  |             |                |

|           |            |            |            |            |              |                |
|-----------|------------|------------|------------|------------|--------------|----------------|
| DM02099P1 | 0.20522502 | 1.1580049  | -1.1621644 | 1.0998312  | LOC1001234   | XM_001607040.1 |
| DM13637P2 | 0.20523363 | 1.3505311  | 1.0431391  | 1.0536869  |              |                |
| DM08718P1 | 0.20531587 | 1.1708454  | 1.2060761  | 1.5791247  |              |                |
| DM04544P3 | 0.20539849 | -1.1397309 | -1.124216  | -1.1537465 | CPIPJ_CPIJ01 | XM_001864522.1 |
| DM04456P4 | 0.20543379 | 1.0599533  | 1.1185116  | -1.045329  | DVIR\GJ1231  | XM_002046709.1 |
| DM02445P3 | 0.20544523 | -1.3547539 | -1.2620512 | -1.2693313 | DVIR\GJ2171  | XM_002049622.1 |
| DM08336P3 | 0.20569088 | -1.225758  | -1.0431355 | -1.0680581 |              |                |
| DM04948P4 | 0.2057563  | 1.1177012  | -1.1811811 | -1.082083  |              |                |
| DM14504P1 | 0.2058424  | 1.1772507  | 1.1191522  | -1.5849409 | LOC408615    | XM_392156.3    |
| DM01597P2 | 0.20588756 | 1.0111779  | -1.008606  | 1.0284549  |              |                |
| DM11545P1 | 0.20599021 | -1.1245044 | -1.8178202 | 1.3103511  |              |                |
| DM13513P2 | 0.20603606 | -1.1429566 | 1.0350987  | -1.0642015 |              |                |
| DM06510P2 | 0.20604055 | 1.1114455  | -1.0029403 | 1.1437806  |              |                |
| DM10439P2 | 0.20610327 | -1.1582327 | 1.1735569  | 1.0688248  |              |                |
| DM13656P3 | 0.20613721 | 1.2308599  | 1.5124938  | -1.0078608 |              |                |
| DM00225P3 | 0.2061625  | 1.0119612  | -1.138732  | 1.077729   | LOC1000738   | XM_001505487.1 |
| DM05409P1 | 0.20618364 | 1.4523191  | -1.1287069 | 1.2356683  |              |                |
| DM06543P1 | 0.2062511  | -1.0220771 | -1.5281951 | 1.3095224  |              |                |
| DM10933P3 | 0.20639588 | 1.4153775  | 1.4743224  | 1.5675085  |              |                |
| DM05085P2 | 0.20650324 | -1.0558331 | -1.2560005 | -1.1785063 |              |                |
| DM04372P3 | 0.20651765 | -1.133505  | -1.3837266 | -1.1777215 |              |                |
| DM00990P4 | 0.2065225  | 1.1923869  | 1.0811036  | 1.282652   | HMHA1        | NM_001142701.1 |
| DM08126P1 | 0.20661786 | 1.0062624  | 1.0273782  | 1.5379971  |              |                |
| DM04033P1 | 0.20663553 | 1.0334616  | 1.1618954  | -1.1748054 |              |                |
| DM04024P2 | 0.20682369 | 1.3313364  | 1.2335317  | 1.1387503  | LOC592480    | XM_792000.2    |
| DM15253P2 | 0.20693517 | 1.3272288  | 1.2156188  | 1.3358228  |              |                |
| DM13999P1 | 0.20702527 | -1.2594438 | 1.1169671  | 1.051641   |              |                |
| DM06658P2 | 0.20706713 | -1.1695935 | -1.1737247 | -1.1771604 |              |                |
| DM14808P2 | 0.20709646 | 1.0398581  | 1.2237158  | 1.2548268  |              |                |
| DM01765P1 | 0.20709895 | 1.0025077  | -1.1604863 | 1.233174   | DPSE\GA134   | XM_001360650.2 |
| DM01260P4 | 0.20713955 | 1.2349942  | 1.421717   | -1.3850867 |              |                |
| DM10110P1 | 0.2071416  | 1.0950289  | 1.0934842  | -1.0252553 |              |                |
| DM02202P1 | 0.20716348 | 1.570012   | 1.071547   | 1.2086062  | LOC661114    | XM_967296.2    |
| DM04525P2 | 0.20717093 | -1.5445291 | -1.1739823 | -1.1231232 |              |                |
| DM12407P1 | 0.20720862 | 1.0368994  | 1.1977359  | 1.0288739  |              |                |
| DM08747P1 | 0.20721066 | 1.0818329  | 1.1026475  | -1.1315393 |              |                |
| DM02385P1 | 0.20732445 | -1.2886568 | -1.1923791 | -1.19734   | DPER\GL116   | XM_002016512.1 |
| DM12432P1 | 0.20747806 | 1.2567878  | 1.2841218  | 1.2793366  |              |                |
| DM07482P3 | 0.20757423 | -1.2270676 | -1.5719775 | 1.2976644  |              |                |
| DM03929P1 | 0.20762023 | 1.3415626  | 1.1432817  | 1.0755029  |              |                |
| DM04822P1 | 0.20763618 | 1.1945562  | -1.5781894 | 1.115567   |              |                |
| DM15119P1 | 0.20766275 | -1.1387136 | -1.0309875 | 1.0780393  |              |                |
| DM03212P3 | 0.20767891 | -1.0539155 | -1.1671902 | -1.1199719 |              |                |
| DM06263P2 | 0.20784788 | -1.4073766 | 1.0763115  | 1.5098647  |              |                |
| DM05231P2 | 0.20798697 | 1.1730286  | 1.1161789  | -1.060837  |              |                |
| DM08536P2 | 0.2080173  | -1.1256429 | -1.0159202 | -1.1582097 |              |                |
| DM11506P1 | 0.20802183 | 1.15546    | 1.2477454  | 1.5128788  |              |                |
| DM10138P4 | 0.20803791 | 1.1081961  | 1.1103132  | 1.2866935  |              |                |
| DM13759P1 | 0.20805421 | 1.0096818  | 1.1641505  | 1.3585256  |              |                |
| DM15036P1 | 0.20809759 | -1.0185935 | 1.1702347  | 1.4906112  |              |                |

|           |            |            |            |            |             |                |
|-----------|------------|------------|------------|------------|-------------|----------------|
| DM06623P3 | 0.20820893 | 1.1384184  | 1.1413649  | 1.363969   |             |                |
| DM12214P3 | 0.20823975 | -1.3013055 | -1.4688908 | 1.7199928  |             |                |
| DM01063P2 | 0.20824814 | 1.0783361  | 1.2190017  | -1.109706  | CG42400     | NM_165245.3    |
| DM09062P4 | 0.20826876 | -1.0236247 | -1.0615987 | 1.1136518  |             |                |
| DM13761P3 | 0.2082802  | -1.0503908 | -1.0135504 | -1.1889044 |             |                |
| DM02275P3 | 0.20829879 | 1.3374878  | 1.4386368  | 1.2601818  | LOC552523   | XM_624899.1    |
| DM02483P2 | 0.20833574 | -1.3351893 | -1.1279466 | -1.3139068 | DWIL\GK248  | XM_002067127.1 |
| DM09851P1 | 0.20838426 | -1.2536529 | -1.1479343 | -1.2716658 |             |                |
| DM05322P1 | 0.20843302 | -1.0230341 | 1.1245838  | -1.1259587 |             |                |
| DM02186P2 | 0.20848165 | 1.1101255  | 1.094892   | -1.2445035 |             |                |
| DM03131P3 | 0.20877306 | -1.0238906 | -1.0269079 | -1.1918627 | PSMB2       | NM_001162968.1 |
| DM10441P1 | 0.20877454 | -1.2776351 | 1.0484636  | -1.1735048 |             |                |
| DM04964P1 | 0.20887946 | -1.0352048 | 1.1582831  | 1.4979409  |             |                |
| DM01552P3 | 0.20893921 | -1.0398668 | -1.0642073 | 1.0943651  | DYAK\GE262  | XM_002097498.1 |
| DM11253P2 | 0.20899454 | -1.1462994 | -1.3181006 | -1.181232  |             |                |
| DM13894P4 | 0.20909433 | -1.3647678 | 1.1754156  | -1.3720189 |             |                |
| DM01311P2 | 0.20911978 | -1.1306388 | -1.2463894 | -1.1493657 | COPA        | NM_001098398.1 |
| DM02993P2 | 0.20912093 | -1.0430135 | -1.1061559 | 1.1520262  | LOC1002552  | XM_002285618.1 |
| DM04142P1 | 0.20916584 | 1.0685825  | 1.0895647  | 1.2673448  |             |                |
| DM05934P2 | 0.20932086 | 1.012074   | 1.0138755  | -1.0888946 |             |                |
| DM03111P2 | 0.20934805 | -1.1038494 | -1.1424813 | -1.0295731 |             |                |
| DM03116P1 | 0.2093659  | 1.139987   | 1.0181189  | 1.1173162  | AAEL_AAEL0C | XM_001657732.1 |
| DM08334P1 | 0.20951103 | 1.0478504  | 1.0839661  | 1.1093107  |             |                |
| DM01687P2 | 0.20958447 | -1.0621257 | -1.0712568 | 1.0942252  | LOC552638   | XM_625013.2    |
| DM12771P3 | 0.20992644 | 1.1883429  | 1.232834   | -1.0302713 |             |                |
| DM10141P1 | 0.20995575 | -1.2150702 | -1.1376874 | 1.1130315  |             |                |
| DM00519P3 | 0.20996065 | 1.0472775  | -1.0285722 | 1.1613988  | DSIM\GD196  | XM_002102156.1 |
| DM04083P1 | 0.20997149 | -1.1465396 | -1.16734   | 1.0030918  | LOC1001647  | XM_001951325.1 |
| DM06244P1 | 0.20997171 | -1.1341617 | 1.057934   | -1.027821  | LOC654951   | XM_961391.2    |
| DM03033P1 | 0.21000467 | -1.2070562 | -1.3725032 | -1.1916593 | LOC551872   | XM_624258.2    |
| DM02762P1 | 0.21002658 | 1.0937134  | 1.527954   | -1.1104552 |             |                |
| DM05874P3 | 0.2100697  | -1.0898921 | 1.1510966  | -1.024342  |             |                |
| DM04777P1 | 0.2102297  | -1.0920788 | -1.1440787 | -1.2198678 |             |                |
| DM05997P2 | 0.21024863 | 1.134043   | 1.1193817  | -1.0745863 |             |                |
| DM12748P1 | 0.21031132 | 1.032539   | 1.265604   | 1.0374378  |             |                |
| DM12071P2 | 0.21031326 | 1.3180226  | 1.0912575  | 1.5473756  |             |                |
| DM05359P3 | 0.2103763  | 1.0467094  | -1.039987  | -1.3575765 |             |                |
| DM12326P2 | 0.21038544 | -1.1298687 | -1.3580375 | -1.1311501 |             |                |
| DM03237P1 | 0.21051271 | 1.0540422  | -1.5521754 | 1.2719308  | DYAK\GE224  | XM_002095538.1 |
| DM03582P3 | 0.2105278  | -1.037762  | 1.0978383  | -1.0005021 |             |                |
| DM07382P1 | 0.21055672 | 1.8395609  | 2.4603887  | 1.3064641  |             |                |
| DM14453P4 | 0.21055946 | -1.1337836 | 1.1216877  | 1.2572103  |             |                |
| DM13340P1 | 0.21059763 | -1.1461506 | -1.1214725 | 1.0739379  |             |                |
| DM00159P1 | 0.2106117  | -1.0844907 | -1.1169405 | 1.1486592  | DVIR\GJ2291 | XM_002054201.1 |
| DM10195P2 | 0.21065181 | 1.1708667  | 1.1687493  | 1.4080845  |             |                |
| DM05099P2 | 0.21072386 | 1.0298035  | -1.0151932 | -1.1034315 |             |                |
| DM02583P1 | 0.21074194 | 1.0761576  | 1.103165   | 1.5186254  | DERE\GG151  | XM_001971695.1 |
| DM10220P2 | 0.21078952 | 1.0471258  | -1.053146  | -1.0303777 |             |                |
| DM10059P3 | 0.21084878 | -1.0793693 | -1.4968221 | 1.0595331  |             |                |
| DM06604P3 | 0.21085072 | -1.1109468 | -2.5925217 | 1.1275713  |             |                |

|           |            |            |            |            |              |                |
|-----------|------------|------------|------------|------------|--------------|----------------|
| DM13008P1 | 0.21090747 | 2.1986938  | 3.7932563  | 1.6929426  | NLP-31       | NM_071706.4    |
| DM08614P1 | 0.21092498 | 1.0902297  | -1.4000951 | 1.100856   |              |                |
| DM15072P1 | 0.21102595 | -1.0093744 | -1.2856066 | 1.3481717  |              |                |
| DM11053P1 | 0.21108435 | -1.0497181 | -1.02349   | -1.3161894 |              |                |
| DM15101P2 | 0.21109648 | -1.0661776 | -1.0649014 | -1.302855  |              |                |
| DM04310P1 | 0.21114025 | 1.2764164  | 1.0387056  | 1.2565459  | SAMD4A       | XM_421450.2    |
| DM02224P3 | 0.211188   | 1.1415457  | -1.0564846 | 1.0193124  | DGRI\GH143'  | XM_001994708.1 |
| DM03897P3 | 0.21121596 | 1.0446192  | -1.2892905 | -1.2250674 | LOC1001180'  | XM_001599591.1 |
| DM11313P3 | 0.21135864 | -1.0480635 | -1.1876823 | 1.0299226  | CPIPJ_CPIJOC | XM_001844979.1 |
| DM04930P1 | 0.21136689 | 1.079711   | -1.1153588 | 1.0109448  |              |                |
| DM11631P1 | 0.21139315 | 1.12458    | 1.2339034  | -1.0698575 |              |                |
| DM05227P1 | 0.21149188 | -1.0835351 | -1.0760598 | -1.2106329 |              |                |
| DM01783P3 | 0.21150151 | -1.1795826 | 1.1490535  | -1.1634552 | SNOG_05978   | XM_001796314.1 |
| DM07272P1 | 0.21150747 | 1.7449358  | 1.762526   | 1.0398225  |              |                |
| DM09910P2 | 0.21152297 | 1.0603383  | 1.2276925  | -1.172242  |              |                |
| DM04017P1 | 0.21159111 | 1.1220372  | 1.0011257  | 1.0253284  | AGAP_AGAP0   | XM_311527.3    |
| DM14800P1 | 0.21163115 | -1.0652074 | -1.2295568 | -1.2291075 |              |                |
| DM02865P3 | 0.21170425 | 1.1961724  | 1.1504864  | 1.1957967  | GHITM        | NM_001017195.2 |
| DM08011P3 | 0.21170735 | -1.2470472 | 1.2751423  | -1.0569344 |              |                |
| DM00620P2 | 0.21179321 | -1.012079  | 1.1038467  | 1.1158348  | DNAJB5       | XM_860937.1    |
| DM06182P1 | 0.21182698 | 1.8118517  | -6.867705  | 1.3217633  |              |                |
| DM00241P1 | 0.21183605 | -1.169515  | -1.0291015 | -1.1511726 | ISCW_ISCWC   | XM_002411185.1 |
| DM11044P3 | 0.21191691 | -1.1603577 | -1.0934948 | -1.1975161 |              |                |
| DM00613P1 | 0.21195023 | 1.0190591  | 1.0225862  | -1.1728696 |              |                |
| DM13977P4 | 0.2120025  | -1.1279713 | 1.1685541  | 1.2434644  |              |                |
| DM05834P4 | 0.21211778 | 1.0956142  | -1.0697992 | -1.102864  | LOC725788    | XM_001121595.1 |
| DM05920P2 | 0.21214077 | -1.0340351 | -1.2531798 | 1.0988054  |              |                |
| DM07107P4 | 0.21226622 | 1.394581   | -2.1044638 | 1.3654932  |              |                |
| DM08774P1 | 0.21241142 | 1.3983417  | 1.6274308  | 1.5537807  |              |                |
| DM09344P1 | 0.21243754 | -1.1457627 | -1.1303675 | -1.1174408 |              |                |
| DM09417P2 | 0.21249348 | 1.0742261  | 1.1950604  | 1.1887996  |              |                |
| DM04190P4 | 0.21257937 | 1.2184187  | 1.2436751  | 1.2336291  |              |                |
| DM15304P1 | 0.21264099 | -1.2867985 | -1.1811975 | -1.1887826 |              |                |
| DM07640P1 | 0.21274915 | 1.0007613  | -1.1065985 | 1.1676478  |              |                |
| DM01790P1 | 0.212832   | 1.0471383  | 1.0768257  | -1.0909034 |              |                |
| DM15149P1 | 0.21284607 | -1.0074383 | -1.4654515 | 1.2815526  | CG34333      | NM_001103396.1 |
| DM11030P2 | 0.21300876 | 1.2048215  | 1.0626025  | -1.2078124 |              |                |
| DM10802P2 | 0.21301152 | 1.0819191  | 1.1407787  | 1.0596837  |              |                |
| DM02244P4 | 0.2130249  | -1.29694   | -1.0445455 | -1.1878166 | LOC1001651'  | XM_001951292.1 |
| DM00029P1 | 0.21303286 | 1.1151646  | -1.0366489 | -1.1553128 | AGAP_AGAP0   | XM_308279.4    |
| DM11478P3 | 0.21304439 | 1.2319715  | 1.098405   | -1.3050221 |              |                |
| DM15114P2 | 0.2132663  | -1.150687  | 1.0441378  | -1.069262  |              |                |
| DM06692P2 | 0.21328638 | 1.1005495  | -1.2113402 | 1.0791596  |              |                |
| DM12048P1 | 0.2133357  | -1.4064124 | -1.5889783 | -1.2551737 |              |                |
| DM12483P1 | 0.21339494 | 1.0732394  | -1.2247595 | 1.0253078  |              |                |
| DM04769P1 | 0.21352246 | -1.0260937 | -1.1152747 | -1.3226985 |              |                |
| DM14000P1 | 0.21353668 | -1.6217035 | -1.1201999 | 1.0188404  |              |                |
| DM04257P1 | 0.21359736 | -1.0868869 | -1.0920409 | 1.0943123  |              |                |
| DM09104P2 | 0.21367492 | -1.059564  | 1.1534048  | -1.1286159 |              |                |
| DM02981P3 | 0.21377622 | -1.2540656 | -1.2908195 | 1.1294827  | LOC1001623'  | XM_001950988.1 |

|           |            |            |            |            |            |                |
|-----------|------------|------------|------------|------------|------------|----------------|
| DM05792P2 | 0.21379346 | -1.0647656 | -1.1203539 | -1.1751504 | LOC726306  | XM_001122054.1 |
| DM12912P2 | 0.21380791 | 1.0437075  | -1.0416967 | -1.1902839 |            |                |
| DM10352P3 | 0.21394154 | -1.1670815 | 1.3713096  | 1.1886503  | VTGA2      | NM_001159281.1 |
| DM03149P3 | 0.21396527 | 1.104442   | 1.0748693  | -1.1233479 | SEC15      | XM_393572.3    |
| DM03495P2 | 0.21426971 | -1.061502  | -1.0590732 | -1.2056451 |            |                |
| DM14950P4 | 0.21441191 | 1.026579   | 1.0580037  | -1.1620578 |            |                |
| DM15193P2 | 0.21447834 | 1.0856259  | 1.3597238  | 1.4459711  |            |                |
| DM04558P3 | 0.21449551 | 1.1019195  | 1.0712472  | -1.2383605 |            |                |
| DM08623P2 | 0.2145557  | -1.1700634 | -1.1941499 | -1.1450332 |            |                |
| DM02003P2 | 0.2145564  | -1.1581106 | -1.124647  | 1.0587306  | POPTRDRAFT | XM_002311866.1 |
| DM10243P1 | 0.2145753  | -1.0685649 | -1.1558591 | -1.0394934 | DPSE\GA239 | XM_002135210.1 |
| DM06080P1 | 0.2145956  | -1.0806988 | -1.1899463 | -1.0900465 | LOC657563  | XM_964017.2    |
| DM11679P2 | 0.21462321 | -1.0726876 | 1.0377127  | -1.1463828 |            |                |
| DM13039P2 | 0.21465012 | -1.2006675 | -1.2057699 | -1.0758628 |            |                |
| DM01670P2 | 0.21468656 | -1.0839247 | -1.0719196 | 1.0958384  | GPX5       | NM_001025335.2 |
| DM02580P1 | 0.21470524 | -1.0318533 | 1.1122215  | 1.0761224  | ISCW_ISCWC | XM_002412631.1 |
| DM08584P1 | 0.21471024 | -1.0420938 | -1.0605227 | 1.028922   |            |                |
| DM02232P2 | 0.21471278 | 1.010744   | -1.1107166 | 1.0620278  | NME1       | NM_008704.2    |
| DM00434P4 | 0.21479264 | -1.1429145 | -1.7095883 | 1.8297524  | COL-50     | NM_058793.1    |
| DM05372P1 | 0.2148024  | 1.0697222  | -2.7829423 | -1.1209818 |            |                |
| DM01535P3 | 0.2148385  | 1.0120766  | 1.0248939  | -1.198272  | DPSE\GA184 | XM_001358084.2 |
| DM01500P1 | 0.21483989 | 1.1274803  | 1.2682489  | -1.1509618 | DGRI\GH150 | XM_001984368.1 |
| DM13836P1 | 0.21486346 | 1.0519756  | -1.5603626 | -1.0586908 |            |                |
| DM07633P3 | 0.21489273 | 1.1213739  | 1.1272469  | -1.052479  |            |                |
| DM12849P1 | 0.21492524 | 1.1555554  | 1.157996   | -1.0297396 |            |                |
| DM14369P1 | 0.21496764 | -1.1795204 | -1.0675848 | 1.0090818  |            |                |
| DM05223P1 | 0.21498379 | -1.1999935 | -1.0808893 | 1.07036    |            |                |
| DM09286P2 | 0.2150406  | 1.091377   | 1.1190466  | -1.1324844 |            |                |
| DM02134P2 | 0.21510474 | -1.4195782 | -1.1123139 | -1.0381541 | LOC1000592 | XM_001494180.2 |
| DM01199P2 | 0.21534553 | 1.2844073  | 1.1028384  | -1.062821  |            |                |
| DM03066P4 | 0.21543081 | -1.1503508 | -1.0175894 | -1.0045968 | LOC550824  | XM_623214.2    |
| DM12440P1 | 0.21549459 | 1.0372232  | 1.0028385  | -1.0986084 |            |                |
| DM03031P3 | 0.21550284 | 1.0089492  | -1.2081331 | -1.0684917 | DPSE\GA205 | XM_001358942.2 |
| DM06350P3 | 0.21551332 | 1.1095229  | 1.0575893  | -1.2405983 |            |                |
| DM05152P1 | 0.21555813 | 1.1688281  | 1.2015119  | 1.0862476  |            |                |
| DM11918P3 | 0.21557152 | 1.0094911  | -1.1172847 | 1.7816503  |            |                |
| DM03265P4 | 0.21573874 | 1.0632297  | 1.1211361  | -1.0194968 |            |                |
| DM03623P2 | 0.21574748 | 1.1004134  | 1.1503246  | -1.069009  | LOC657831  | XM_964266.1    |
| DM04727P1 | 0.21580374 | -1.122441  | 1.0011835  | 1.166365   |            |                |
| DM01329P3 | 0.21584907 | -1.0070047 | -1.0144256 | -1.5140905 | LOC664351  | XM_970362.2    |
| DM13244P1 | 0.21592285 | -1.85588   | -1.2816807 | -1.2353529 |            |                |
| DM13831P4 | 0.21593684 | -1.2375557 | -1.111793  | -1.0333531 |            |                |
| DM12060P3 | 0.21595083 | -1.051498  | 1.0938059  | 1.0989381  |            |                |
| DM10892P2 | 0.2159654  | 1.3840134  | 1.1911834  | 1.3039018  |            |                |
| DM00651P1 | 0.21597135 | -1.4311932 | -1.3626419 | -2.0690317 | ISCW_ISCWC | XM_002399272.1 |
| DM13615P1 | 0.2159774  | -1.4528798 | 1.1455423  | -1.1375564 |            |                |
| DM12039P1 | 0.21614125 | -1.1526641 | -1.0045228 | -1.0672959 | LOC1002319 | XM_002199836.1 |
| DM06464P2 | 0.21619143 | -1.2790912 | -1.2657048 | 1.0997467  |            |                |
| DM00778P1 | 0.2163093  | -1.0422208 | -1.1145048 | -1.3763216 | LOC1000523 | XM_001496088.2 |
| DM10074P3 | 0.21635938 | -1.3138547 | -1.5662721 | -1.0170265 |            |                |

|           |            |            |            |            |             |                |
|-----------|------------|------------|------------|------------|-------------|----------------|
| DM00217P4 | 0.21644531 | -1.135982  | -1.0130271 | -1.2799575 | OLA1        | NM_025942.2    |
| DM11387P1 | 0.21650779 | 1.5481824  | 1.3636717  | 1.3947964  |             |                |
| DM13728P2 | 0.21659285 | 1.1566966  | 1.2107141  | -1.0214647 |             |                |
| DM09044P2 | 0.2166265  | -1.0779016 | 1.0572536  | -1.156514  |             |                |
| DM00389P1 | 0.21663585 | 1.0438213  | -1.153755  | 1.0424101  | DANA\GF105  | XM_001957646.1 |
| DM13070P4 | 0.2167338  | -1.2633519 | -1.1338998 | -1.2768124 |             |                |
| DM00811P1 | 0.21685657 | -1.0793968 | -1.1299751 | -1.1414815 | SF1         | NM_079915.2    |
| DM03341P3 | 0.2168892  | -1.1158954 | 1.0974445  | 1.0259992  |             |                |
| DM04985P2 | 0.21690722 | 1.2147307  | 1.4804064  | 1.184837   |             |                |
| DM01402P3 | 0.21704611 | 1.2431263  | 1.4277753  | -1.0379095 | DVIR\GJ1111 | XM_002056729.1 |
| DM09629P1 | 0.21708532 | -1.6917087 | -1.4779756 | -1.1264839 |             |                |
| DM09991P1 | 0.21715894 | 1.0827675  | -1.0901273 | -1.1814668 | DANA\GF201  | XM_001963618.1 |
| DM02072P3 | 0.21721351 | 1.156659   | 1.2616675  | 1.1450424  | LOC798292   | XM_001334663.2 |
| DM10834P1 | 0.21729292 | 1.0206026  | 1.1865636  | -1.0898097 |             |                |
| DM07996P1 | 0.21742615 | 1.001985   | 1.0151031  | 1.1568418  |             |                |
| DM07413P1 | 0.2176787  | -1.037634  | -1.1536362 | 1.042003   |             |                |
| DM09329P1 | 0.21773946 | 1.1834716  | -1.1930754 | -1.009275  |             |                |
| DM02382P1 | 0.21782114 | 1.117038   | 1.1218382  | 1.0080624  | ACSS3       | XM_416118.2    |
| DM02123P3 | 0.21788311 | -1.0420252 | -1.1979026 | -1.0267977 | DYAK\GE197  | XM_002095367.1 |
| DM09943P3 | 0.21802154 | -1.1828219 | -1.0120971 | -1.1016334 | LOC1001866  | XM_002131962.1 |
| DM04339P1 | 0.2180246  | -1.1530151 | -1.0010487 | -1.1510829 |             |                |
| DM02346P2 | 0.21805902 | 1.0693673  | 1.3076621  | 1.0866648  | AGAP_AGAP0  | XM_001688043.1 |
| DM06502P3 | 0.21813667 | -1.0232711 | -1.9708737 | 1.6132106  | DANA\GF123  | XM_001958774.1 |
| DM08601P3 | 0.21817414 | 1.1853851  | 1.2234665  | 1.1742444  |             |                |
| DM06200P1 | 0.21820834 | -1.1412531 | -1.0846698 | 1.165337   | LOC1001748  | NM_001130902.1 |
| DM06107P1 | 0.2182107  | 1.1165088  | 1.2113154  | -1.3494374 |             |                |
| DM05864P1 | 0.21825242 | 1.078451   | 1.5741868  | -1.2234133 |             |                |
| DM09375P4 | 0.21829697 | -1.3006009 | 1.0808192  | -1.2788272 |             |                |
| DM00174P2 | 0.21833895 | -1.0621127 | 1.0399278  | -1.1332933 | DERE\GG161  | XM_001973431.1 |
| DM14737P1 | 0.21834259 | 1.2258878  | 1.8623306  | 1.5644604  |             |                |
| DM13776P1 | 0.21845396 | -1.2380463 | -1.0516397 | -1.0098578 |             |                |
| DM11652P2 | 0.21845725 | 1.0057904  | 1.1373684  | -1.1169184 |             |                |
| DM03027P1 | 0.21852395 | 1.1305764  | 1.174562   | 1.1663992  | DANA\GF160  | XM_001955703.1 |
| DM10551P3 | 0.21863316 | 1.0057971  | 1.2280941  | 1.0895715  |             |                |
| DM09385P2 | 0.2187118  | 1.0926094  | -1.0389428 | 1.175227   |             |                |
| DM04993P1 | 0.21877845 | 1.0053805  | -1.221177  | 1.1531097  |             |                |
| DM13004P1 | 0.2187894  | 1.0582739  | 1.2511283  | 1.236599   |             |                |
| DM04650P1 | 0.21883462 | 1.0165008  | -1.2967492 | 1.4541168  | DYAK\GE224  | XM_002095540.1 |
| DM12260P1 | 0.21900523 | 1.1160524  | 1.1223559  | 1.1705829  |             |                |
| DM00689P2 | 0.21905614 | 1.0184147  | -1.0008589 | -1.0775237 | LOC408507   | XM_392050.3    |
| DM03604P1 | 0.21909752 | 1.246982   | 1.3467559  | 1.158533   | SI:CH211-28 | XM_679687.3    |
| DM14226P1 | 0.21909824 | -1.0501153 | 1.117686   | 1.3465972  |             |                |
| DM09876P1 | 0.2191105  | -1.0035334 | 1.0463283  | 1.6373302  |             |                |
| DM14561P1 | 0.21915577 | -1.0800534 | 1.2629812  | 1.3794966  |             |                |
| DM12668P3 | 0.21916509 | 1.0481045  | 1.0449164  | -1.1337223 |             |                |
| DM02266P1 | 0.21924895 | -1.2476478 | -1.1567734 | 1.0279163  |             |                |
| DM01666P1 | 0.21926606 | 1.4365684  | 1.3693649  | 1.3304654  |             |                |
| DM13793P1 | 0.21927042 | 1.081556   | 1.1593616  | -1.0202206 |             |                |
| DM13357P1 | 0.21929708 | -1.0852242 | -1.2373933 | 1.0720129  |             |                |
| DM12784P1 | 0.2193103  | 1.0799034  | -1.1605533 | 1.1659423  |             |                |

|           |            |            |            |            |                            |
|-----------|------------|------------|------------|------------|----------------------------|
| DM11057P1 | 0.21935761 | -1.0142905 | 1.0333719  | -1.2372856 |                            |
| DM12537P1 | 0.21943703 | -1.0399395 | -1.8992369 | 1.1539513  |                            |
| DM01702P2 | 0.21948095 | 1.1480944  | 1.0242248  | -1.0988141 | DSIM\GD176 XM_002105351.1  |
| DM06578P2 | 0.2195806  | 1.2299385  | 1.3495138  | -1.1246508 |                            |
| DM14103P1 | 0.21960978 | 1.1795837  | 1.1365877  | -1.0890344 |                            |
| DM07224P1 | 0.21972142 | -1.0540742 | -2.3821576 | 1.1429555  |                            |
| DM03204P3 | 0.21972461 | -1.0405498 | -1.0166489 | -1.4606011 |                            |
| DM03036P2 | 0.21973276 | -1.2743032 | -1.0874856 | -1.0003825 | LOC1000673 XM_001502120.1  |
| DM02731P3 | 0.21978441 | 1.0493423  | -1.2300271 | -1.0589633 | HSP XM_001650527.1         |
| DM08014P1 | 0.21987435 | -1.0888568 | -1.0336359 | -1.2190349 |                            |
| DM13769P3 | 0.21988086 | 1.1169477  | 1.5682352  | 1.3861811  |                            |
| DM06461P3 | 0.22009304 | 1.3007733  | 1.0173236  | -1.0063331 |                            |
| DM05079P2 | 0.22018771 | 1.1290778  | -1.244394  | 1.0903977  |                            |
| DM10881P3 | 0.22024262 | 1.1559006  | 1.3008265  | -1.0640092 | LELG_03959 XM_001524878.1  |
| DM11717P3 | 0.22027175 | -1.1995016 | -1.1933658 | -1.1140319 | RPS18A XM_001658273.1      |
| DM08074P4 | 0.22029234 | 1.7751318  | 3.386323   | 1.2963927  | DEHA2A0979 XM_456757.1     |
| DM14243P1 | 0.22040035 | -1.0963479 | -1.0960276 | 1.0407996  | LOC1001235 XM_001607142.1  |
| DM06541P2 | 0.22041646 | -1.2613881 | -1.2641315 | 1.205737   |                            |
| DM07329P3 | 0.22047143 | 1.4476484  | 1.3487505  | 1.5153958  |                            |
| DM12586P1 | 0.22048718 | -1.2361453 | -1.0752122 | -1.1150906 |                            |
| DM06164P3 | 0.22055686 | -1.2045437 | -1.2063166 | 1.1098294  |                            |
| DM03779P2 | 0.22071321 | 1.0580713  | 1.1211034  | -1.3070594 | DWIL\GK162 XM_002067334.1  |
| DM10147P1 | 0.22082517 | 1.0201901  | 1.0745231  | -1.1569302 |                            |
| DM08883P1 | 0.22083868 | -1.1262443 | 1.0790169  | -1.1581081 |                            |
| DM02974P1 | 0.2209368  | -1.250509  | -1.698847  | 1.1427144  |                            |
| DM00674P3 | 0.2209406  | 1.0827669  | 1.0161134  | -1.064064  | CNOT2 XM_856796.1          |
| DM05218P1 | 0.2209609  | -1.1581702 | -1.3072599 | -1.2899784 |                            |
| DM14355P2 | 0.22097501 | -1.1228552 | 1.0157511  | 1.130442   |                            |
| DM15010P1 | 0.22101906 | -1.0329192 | 1.245785   | 1.4226472  |                            |
| DM13285P3 | 0.22105905 | -1.3820696 | -1.1150827 | -1.0784049 |                            |
| DM15094P3 | 0.22111225 | 1.2414166  | -1.0839784 | 1.0118674  |                            |
| DM11829P3 | 0.22123861 | 1.4787618  | -2.1740549 | 3.0541484  |                            |
| DM07635P1 | 0.22130503 | -1.0238873 | 1.1640489  | -1.0506417 |                            |
| DM03356P1 | 0.22133973 | 1.2522393  | 1.092016   | 1.3416495  |                            |
| DM07170P1 | 0.22135992 | 1.0409148  | 1.1883755  | 1.3920382  |                            |
| DM13346P4 | 0.22140189 | 1.0852468  | -1.0379231 | -1.0828481 | CC1G_11196 XM_001834231.1  |
| DM10976P2 | 0.22144313 | 1.057806   | -1.2719252 | 1.1271645  | GRIP1 NM_001044851.1       |
| DM07987P1 | 0.22147785 | 1.2013817  | 1.1474819  | 1.1496723  |                            |
| DM07842P1 | 0.22148451 | -1.1296736 | -1.1360712 | 1.0833862  |                            |
| DM02680P2 | 0.22154349 | 1.9909104  | 2.5103858  | 1.2114123  |                            |
| DM02482P2 | 0.22169504 | -1.0605732 | 1.1663737  | -1.0907425 | LOC1001690 XM_001942567.1  |
| DM11311P3 | 0.22170015 | -1.0763544 | -1.008249  | 1.04037    |                            |
| DM05619P1 | 0.22173347 | -1.0083591 | 1.0995084  | -1.0809699 |                            |
| DM04713P2 | 0.2217869  | 1.52424    | -2.5644326 | 1.8221998  |                            |
| DM13291P2 | 0.22182594 | -1.2271957 | -1.057588  | 1.1551667  | DVIR\GJ1253 XM_002046345.1 |
| DM06778P1 | 0.22184153 | 1.0022273  | -2.4071517 | 1.1388096  |                            |
| DM11146P3 | 0.22188677 | -1.4426793 | -1.7560709 | -1.772415  |                            |
| DM09373P1 | 0.22192417 | 1.0194825  | 1.1069022  | 1.1273992  |                            |
| DM01330P1 | 0.22196144 | 1.0858967  | 1.1455542  | 1.2729508  |                            |
| DM06501P1 | 0.22208068 | 1.3044755  | -1.0624892 | 1.019267   |                            |



|           |            |            |            |            |             |                |
|-----------|------------|------------|------------|------------|-------------|----------------|
| DM00063P3 | 0.22209544 | 1.2072562  | -1.235516  | -1.0199486 | CDC42       | XM_001658190.1 |
| DM11281P1 | 0.22211404 | -1.1302054 | 1.0733788  | -1.2041165 |             |                |
| DM01738P1 | 0.22214657 | -1.0708011 | 1.0118372  | 1.0358179  | BRAFLDRAFT  | XM_002612557.1 |
| DM03514P2 | 0.22232002 | 1.8643273  | 2.302199   | 1.2692003  |             |                |
| DM12003P1 | 0.22237451 | 1.4123858  | 1.1597409  | 1.1267685  |             |                |
| DM11870P2 | 0.22246088 | 1.1574448  | 1.1149125  | 1.0218688  |             |                |
| DM08993P3 | 0.22255777 | -1.1007496 | 1.0709732  | 1.1245626  |             |                |
| DM07802P1 | 0.22261328 | -1.0653287 | 1.0220276  | -1.1870482 |             |                |
| DM04732P3 | 0.2226775  | 1.1845562  | -1.0127858 | 1.1915774  | DANA\GF181  | XM_001954104.1 |
| DM00656P1 | 0.22267893 | 1.0546317  | 1.0310242  | -1.2258162 | DWIL\GK173  | XM_002061986.1 |
| DM03443P4 | 0.22282223 | 1.1171514  | -1.0129793 | -1.380211  |             |                |
| DM03379P3 | 0.22282916 | -1.0905507 | -1.2154506 | -1.0352172 |             |                |
| DM06174P3 | 0.22287612 | 1.0531559  | 1.0963764  | 1.257935   | LOC1001649  | XM_001947405.1 |
| DM07448P3 | 0.22299048 | -1.4859233 | -1.0784467 | -1.3047104 |             |                |
| DM07519P3 | 0.22299407 | 1.3572873  | 1.2843541  | -1.0478853 |             |                |
| DM09881P4 | 0.22305647 | 1.0358415  | 1.1582783  | 1.0142008  |             |                |
| DM07847P1 | 0.22312784 | -1.1615921 | 1.0431256  | 1.1807253  |             |                |
| DM07467P1 | 0.22316085 | -1.2157654 | -1.5185256 | 1.2714201  |             |                |
| DM08135P1 | 0.22320415 | -1.0452714 | 1.3781172  | 1.3360003  |             |                |
| DM09761P2 | 0.22322018 | -1.1510234 | 1.0544525  | 1.1293744  | AHCY        | NM_001021475.1 |
| DM10165P2 | 0.22329877 | -1.0981123 | -1.0942963 | -1.3217515 |             |                |
| DM03558P2 | 0.22340338 | 1.0585597  | -1.0208989 | -1.0484962 |             |                |
| DM09327P1 | 0.22342995 | -1.0360194 | 1.1098518  | -1.1582745 |             |                |
| DM05854P3 | 0.22348034 | -1.1484827 | -1.0198277 | -1.147154  | LOC594644   | XM_001189210.1 |
| DM03353P1 | 0.22353087 | -1.2516147 | -1.1378766 | 1.0266805  | DANA\SNRNA  | XR_045959.1    |
| DM11345P2 | 0.22357447 | -1.3758067 | -1.4119289 | -1.1409029 |             |                |
| DM14807P1 | 0.2236013  | 1.0663462  | -1.1309065 | -1.1430833 |             |                |
| DM08088P2 | 0.2236364  | -1.3355879 | -1.1240213 | -1.1559896 |             |                |
| DM12107P2 | 0.22364382 | 1.0088887  | 1.1597732  | -1.0912802 |             |                |
| DM13655P2 | 0.22364466 | -1.2948692 | -1.0149925 | 1.2130042  |             |                |
| DM12000P2 | 0.2236884  | 1.051888   | 1.0451823  | 1.2303648  |             |                |
| DM11222P3 | 0.22369175 | -1.0221032 | 1.5537622  | -1.6700208 |             |                |
| DM11251P2 | 0.2237168  | 1.2052063  | -1.3824602 | -1.110175  | ATEG_02300  | XM_001211478.1 |
| DM01667P1 | 0.22376533 | -1.18815   | -1.0395144 | 1.0297424  | DVIR\GJ1450 | XM_002058551.1 |
| DM04176P2 | 0.2237712  | 1.1674029  | 1.3156488  | 1.3694048  |             |                |
| DM14810P2 | 0.22379948 | -1.0590588 | 1.2994242  | 1.4353352  |             |                |
| DM08145P4 | 0.22380345 | -1.0618767 | -1.0558494 | -1.1586504 |             |                |
| DM09976P4 | 0.22383831 | 1.2817408  | -1.0191045 | -1.0406969 |             |                |
| DM03309P1 | 0.2238575  | 1.0700057  | 1.1818905  | 1.1318897  | LOC1001587  | XM_001945408.1 |
| DM09490P3 | 0.22391672 | 1.0364058  | 1.1999809  | 1.0789875  |             |                |
| DM05614P1 | 0.22395511 | 1.0145535  | 1.0069062  | -1.229284  |             |                |
| DM12101P3 | 0.22403486 | 1.4519664  | 1.0426896  | 2.3298051  |             |                |
| DM06457P3 | 0.22412089 | -1.0717859 | 1.144109   | -1.0167    |             |                |
| DM10732P1 | 0.22417285 | -1.1065599 | -1.1764475 | -1.2243006 |             |                |
| DM05305P2 | 0.22431318 | 1.2955321  | -1.0887139 | 1.1924405  |             |                |
| DM09339P1 | 0.22434981 | -1.0587419 | 1.0493966  | -1.0082874 |             |                |
| DM10237P1 | 0.22442019 | 1.0237055  | -1.2911403 | 1.1121775  |             |                |
| DM05807P1 | 0.22450598 | -1.0512885 | 1.0304545  | -1.12316   |             |                |
| DM01892P1 | 0.224583   | -1.1295319 | -1.1421727 | -1.0418401 | HINT2       | NM_001107955.2 |
| DM08277P1 | 0.2246039  | -1.1810483 | -1.1317314 | -1.1641948 |             |                |

|           |            |            |            |            |             |                |
|-----------|------------|------------|------------|------------|-------------|----------------|
| DM13441P1 | 0.22462554 | 1.0110896  | -1.0619432 | 1.3177435  |             |                |
| DM14872P4 | 0.22465788 | -1.1521007 | 1.0302339  | 1.1687176  |             |                |
| DM12445P1 | 0.22475852 | -1.1203231 | -1.2123626 | 1.1539737  |             |                |
| DM12334P3 | 0.22495256 | -1.0220265 | 1.0923176  | -1.0886973 | DMOJ\GI2049 | XM_002005461.1 |
| DM10919P2 | 0.22497086 | 1.4563832  | 3.5486157  | -1.0464349 | DYAK\GE1179 | XM_002092238.1 |
| DM08792P1 | 0.22498603 | -1.0934623 | 1.0505761  | -1.1110785 |             |                |
| DM08471P2 | 0.22502574 | -1.0762911 | -1.062219  | 1.2816305  |             |                |
| DM01423P2 | 0.22519878 | -1.0596514 | -1.0398132 | -1.1522276 | DNAJ-2      | NM_001046827.1 |
| DM10069P1 | 0.22523057 | -1.162118  | 1.1762494  | -1.038689  |             |                |
| DM09085P2 | 0.2252343  | -1.0182141 | -1.1022161 | 1.1177286  | MGG_00099   | XM_369145.1    |
| DM05462P3 | 0.22525418 | 1.0257338  | 1.1136241  | -1.0677713 |             |                |
| DM00625P3 | 0.22526948 | -1.1181493 | -1.2041512 | -1.1288065 | SENP7       | NM_020654.3    |
| DM08287P1 | 0.22527152 | -1.3905088 | -1.1078341 | -1.1199553 |             |                |
| DM07613P4 | 0.2253431  | 1.0310658  | -1.0816209 | -1.0369776 |             |                |
| DM08695P1 | 0.2253672  | 1.3750614  | -1.1817156 | 1.8947455  | PHYPADRAFT  | XM_001753776.1 |
| DM07054P4 | 0.2254805  | 1.1273087  | 1.1864532  | 1.2774018  |             |                |
| DM05875P1 | 0.22565536 | 1.1784225  | 1.0814457  | -1.6661991 |             |                |
| DM09257P1 | 0.22566949 | 1.0227102  | -1.1204084 | 1.0748111  |             |                |
| DM12155P3 | 0.22567044 | 1.0223229  | -1.108915  | -1.3762963 |             |                |
| DM15065P1 | 0.2256924  | 1.0979369  | -1.1619    | 1.2167     |             |                |
| DM09075P3 | 0.22577108 | 1.0209929  | 1.0643567  | -1.0976206 |             |                |
| DM01576P1 | 0.22589275 | -1.067864  | -1.0196496 | 1.1008406  | DWIL\GK2489 | XM_002067168.1 |
| DM10234P1 | 0.22590096 | -1.4424342 | -1.2309207 | -1.5252912 |             |                |
| DM02922P2 | 0.22590567 | 1.1806288  | 1.112561   | 1.0026585  | TRIADDRAFT  | XM_002117580.1 |
| DM14276P1 | 0.2260187  | -1.21421   | 1.0748485  | -1.0593297 |             |                |
| DM14437P2 | 0.22602837 | -1.039475  | 1.1227144  | 1.0599446  |             |                |
| DM13215P1 | 0.22605094 | -1.0627294 | -1.2269163 | 1.1078066  |             |                |
| DM12115P1 | 0.22623438 | 2.242428   | 2.594954   | 1.4501337  | DSEC\GM112  | XM_002044331.1 |
| DM11018P3 | 0.22633508 | -1.0444839 | 1.3153422  | 1.1857455  |             |                |
| DM00188P3 | 0.22636496 | -1.1473712 | -1.2711128 | -1.1430222 | LOC10011409 | XM_001606793.1 |
| DM09916P3 | 0.22638163 | 1.3184361  | 1.3127301  | 1.2944844  |             |                |
| DM00544P2 | 0.22644332 | 1.0532008  | -1.1619191 | 1.0119296  | LOC655116   | XM_961626.2    |
| DM04446P2 | 0.22649425 | 1.0436964  | 1.1022248  | -1.1038567 |             |                |
| DM00553P1 | 0.22656442 | -1.0174675 | -1.1018655 | 1.0693702  | LOC664443   | XM_970449.1    |
| DM09529P1 | 0.22664358 | -1.0580766 | -1.0382203 | -1.2664683 |             |                |
| DM09749P3 | 0.22674781 | -1.1031452 | -1.2298636 | 1.0559399  |             |                |
| DM02755P3 | 0.22675157 | -1.245232  | 1.0538127  | 1.1465634  | DMOJ\GI2239 | XM_002000641.1 |
| DM06898P3 | 0.22681308 | 1.1757472  | 1.0141423  | 1.3128016  |             |                |
| DM09476P2 | 0.22683367 | -1.1853929 | 1.0832497  | -1.4198679 |             |                |
| DM00999P1 | 0.22684506 | -1.0262488 | -1.3581498 | -1.0051146 | LOC10011539 | XM_001600013.1 |
| DM13378P3 | 0.22687328 | -1.0687821 | 1.0644774  | -1.1710092 |             |                |
| DM07849P3 | 0.226965   | -1.0337007 | -2.1255352 | 1.6085244  |             |                |
| DM04061P4 | 0.2270005  | 1.2265016  | -1.1796457 | 1.1113522  |             |                |
| DM03303P4 | 0.22700813 | 1.1002014  | 1.289319   | -1.0342621 | RFC4        | NM_001006550.1 |
| DM05140P2 | 0.22701469 | -1.003749  | 1.0759307  | 1.0821074  |             |                |
| DM07246P2 | 0.22714561 | -1.3270501 | -1.1044996 | 1.1071689  |             |                |
| DM03319P4 | 0.22717167 | 1.0309025  | 1.1349764  | 1.1852776  |             |                |
| DM04425P3 | 0.2272955  | -1.0323043 | -1.2449692 | -1.2888103 |             |                |
| DM06596P1 | 0.22731128 | -1.0759898 | -1.0724607 | 1.3026011  |             |                |
| DM13123P2 | 0.22732256 | -1.2278407 | -1.1330471 | 1.037583   |             |                |

|           |            |            |            |            |                            |
|-----------|------------|------------|------------|------------|----------------------------|
| DM06829P2 | 0.22735302 | -1.872591  | -1.3932083 | -2.232038  |                            |
| DM12579P4 | 0.22785176 | -1.0618669 | 1.1260922  | 1.0810195  |                            |
| DM13850P3 | 0.22786465 | 1.4285753  | -1.0594332 | 1.0310332  |                            |
| DM06915P3 | 0.22787523 | 1.4964885  | -2.3095896 | 1.3822325  |                            |
| DM10422P3 | 0.22788471 | -1.0004803 | -1.2412281 | -1.3024242 |                            |
| DM12781P2 | 0.22801541 | -1.0629848 | -1.0997638 | 1.072397   |                            |
| DM07268P2 | 0.22804217 | -1.1506019 | -1.1276747 | 1.0289701  |                            |
| DM15238P3 | 0.22805007 | 1.1223372  | 1.0219784  | 1.2083632  |                            |
| DM06919P2 | 0.2280868  | 1.1444492  | 1.3057541  | 1.5461694  |                            |
| DM00350P2 | 0.22814532 | -1.0251589 | -1.0801243 | -1.1477219 | DVIR\GJ1433 XM_002058357.1 |
| DM10322P3 | 0.22817732 | -1.1022906 | 1.2899013  | 1.0352126  |                            |
| DM11903P2 | 0.228281   | 1.0397394  | 1.0475628  | -1.0719811 |                            |
| DM07686P1 | 0.22829987 | 1.0338526  | -1.1557564 | -1.2913886 |                            |
| DM00638P3 | 0.22838217 | 1.0471991  | 1.0638142  | 1.2387288  | LOC1002094(XM_002158906.1  |
| DM00477P2 | 0.2285008  | 1.195458   | 1.1530623  | -1.0683051 | CCNT1 NM_001001147.1       |
| DM13670P3 | 0.22851883 | 1.3164663  | -1.0887035 | 1.2565926  | TRIADDRAFT_XM_002113507.1  |
| DM00062P2 | 0.22852138 | 1.0610853  | -1.0224025 | 1.0852216  | RABB NM_001043545.1        |
| DM00816P3 | 0.22855318 | -1.1570709 | -1.2258524 | -1.1271214 | BM1_43445 XM_001900115.1   |
| DM12959P2 | 0.22860253 | -1.123133  | -1.0486158 | 1.2384076  | LOC579058 XM_779192.2      |
| DM11853P2 | 0.2286453  | 1.3527964  | 1.2073977  | -1.2012935 |                            |
| DM06723P4 | 0.22873452 | 1.0644381  | 1.1931194  | -1.1275594 | KLHL18 NM_025010.4         |
| DM12996P1 | 0.22887829 | 1.0579339  | 1.106592   | -1.1294357 | LOC1000791 XM_001510113.1  |
| DM01156P2 | 0.22894683 | 1.051542   | -1.2894788 | -1.2054383 |                            |
| DM13167P1 | 0.22898112 | -1.0748527 | 1.1398407  | 1.1759243  |                            |
| DM12075P1 | 0.22898905 | -1.0382247 | 1.0939621  | -1.2134458 | LOC413177 XM_396628.3      |
| DM08962P2 | 0.22910792 | 1.3891685  | 1.028241   | 1.1143286  |                            |
| DM00104P1 | 0.22916041 | 1.1063037  | -1.0300629 | 1.0113845  | ACT XM_001655608.1         |
| DM02473P1 | 0.22916798 | -1.1641161 | 1.1388124  | 1.0248045  | LOC1001640(XM_001947968.1  |
| DM04421P1 | 0.22917835 | 1.4125174  | -1.125125  | -1.2254286 |                            |
| DM10690P4 | 0.22918275 | -1.0784624 | 1.1132109  | -1.0218705 |                            |
| DM13199P2 | 0.22931182 | -1.318004  | 1.0657277  | 1.1391071  |                            |
| DM05393P3 | 0.22937083 | -1.112792  | -1.2056354 | -1.3225771 |                            |
| DM02645P1 | 0.22948644 | -1.0512826 | 1.0517968  | -1.0757233 | PRDX6 NM_001089200.1       |
| DM14868P3 | 0.22953178 | -1.1728963 | -1.6631248 | 1.3278061  |                            |
| DM07684P1 | 0.22958508 | 1.0320222  | 1.0595334  | -1.1464834 |                            |
| DM12488P1 | 0.22964731 | -1.0158615 | -1.0044017 | -1.1228853 |                            |
| DM00870P3 | 0.22966222 | -1.090732  | -1.1042602 | -1.3445674 | ENPP2 NM_057104.2          |
| DM01291P3 | 0.22976412 | 1.250845   | 1.2224118  | 1.096933   | AGAP_AGAP0 XM_307827.4     |
| DM04108P3 | 0.22980571 | -1.2334026 | -1.166428  | -1.0795195 |                            |
| DM07133P1 | 0.22983862 | 1.1653882  | 1.0703176  | 1.1151618  |                            |
| DM09609P2 | 0.22989602 | -1.1184683 | 1.0999383  | -1.116295  |                            |
| DM13527P1 | 0.22999652 | -1.2253675 | -1.5988469 | 1.1645921  | PRKAB2 NM_001113101.1      |
| DM08140P2 | 0.23002248 | 1.0878316  | 1.063677   | 1.3134202  |                            |
| DM11182P2 | 0.23002529 | 1.0621096  | 1.2515106  | 1.1168399  |                            |
| DM09436P1 | 0.23004733 | 1.2253368  | 1.0952543  | 1.0616742  |                            |
| DM15049P2 | 0.23006791 | 1.042131   | -1.1097764 | -1.3135865 |                            |
| DM08348P2 | 0.23022677 | -1.1573064 | 1.1456265  | 1.1491245  |                            |
| DM14371P1 | 0.23033412 | -1.2722349 | -1.693332  | 1.2342169  |                            |
| DM07128P2 | 0.23037028 | 1.188872   | 1.3672673  | 1.2767875  |                            |
| DM00527P2 | 0.23040387 | -1.1732534 | 1.0079695  | 1.0639008  | LOC732954 NM_001046952.1   |

|           |            |            |            |            |             |                |
|-----------|------------|------------|------------|------------|-------------|----------------|
| DM01655P4 | 0.23046543 | 1.2336463  | 1.1382904  | -1.0702002 | RAB18       | NM_001006355.1 |
| DM12706P3 | 0.2304745  | -1.0661942 | -1.015998  | 1.1502308  |             |                |
| DM00510P3 | 0.23064929 | -1.0880852 | -1.1175969 | -1.2413198 | ATP6V1C1    | NM_203841.1    |
| DM14004P2 | 0.23073593 | -1.3044622 | -1.0983096 | 1.0292919  | DRK         | XM_623351.2    |
| DM02102P1 | 0.23074661 | 1.1806109  | -1.0059708 | 1.1615835  | TNNC        | XM_001862803.1 |
| DM14401P3 | 0.23078552 | -1.2585722 | -1.0858722 | 1.018155   |             |                |
| DM05278P2 | 0.23089404 | -1.1843106 | -1.010965  | -1.1435263 |             |                |
| DM11014P2 | 0.23089404 | -1.0302655 | 1.0859318  | -1.02668   |             |                |
| DM00214P3 | 0.23093249 | -1.0277954 | -1.2128966 | -1.108145  | LOC657563   | XM_964017.2    |
| DM07444P1 | 0.23095742 | 1.4734302  | -1.8326026 | 1.4394871  |             |                |
| DM08284P2 | 0.23101847 | 1.0207975  | 1.2952325  | 1.5345924  |             |                |
| DM06283P3 | 0.23102657 | -1.1672837 | -1.1932502 | -1.0705649 |             |                |
| DM02235P3 | 0.23104414 | -1.0285802 | 1.0102113  | 1.1634688  | DYAK\GE116! | XM_002092420.1 |
| DM09208P1 | 0.23107389 | 1.0300745  | 1.0492833  | 1.057128   |             |                |
| DM08400P1 | 0.23110853 | 1.215641   | -1.2443119 | 1.0053881  |             |                |
| DM08891P3 | 0.23111296 | -1.1093655 | 1.0578978  | -1.1823628 |             |                |
| DM10875P1 | 0.23119321 | 1.1007038  | 1.0166049  | 1.6551768  |             |                |
| DM11212P2 | 0.23121178 | 1.1052907  | -1.063809  | 1.0690173  | LOC659185   | XM_965512.2    |
| DM04709P4 | 0.23137052 | -1.0024078 | 1.3156267  | 1.0259097  |             |                |
| DM10588P3 | 0.23146734 | -1.0665808 | 1.0604528  | 1.1120701  | BRAFLDRAFT  | XM_002610056.1 |
| DM14132P3 | 0.23151237 | -1.2099657 | -1.0070102 | -1.2795638 |             |                |
| DM09654P3 | 0.23154916 | -1.0859911 | -1.4674628 | -1.2749275 |             |                |
| DM08855P3 | 0.23160763 | -1.121333  | 1.0420172  | -1.1010221 |             |                |
| DM02770P1 | 0.23161243 | 1.1617026  | 1.2214011  | 1.1218694  |             |                |
| DM14140P1 | 0.2316235  | 1.0308887  | -1.4414679 | 1.0673722  |             |                |
| DM02615P2 | 0.23165736 | 1.6445231  | 1.649301   | 1.3129976  |             |                |
| DM09617P2 | 0.23166414 | -1.0984415 | 1.0413169  | -1.2147546 |             |                |
| DM03654P3 | 0.23191737 | -1.1549643 | -1.4404743 | 1.1133487  |             |                |
| DM01605P3 | 0.23195039 | -1.0476339 | -1.0140696 | -1.1788664 | DWIL\GK163! | XM_002067272.1 |
| DM05608P3 | 0.231978   | 1.0442531  | 1.0489069  | -1.058148  | LOC1001219  | XM_001605473.1 |
| DM15172P2 | 0.23202495 | -1.1295648 | -1.2903643 | -1.1203655 |             |                |
| DM15263P1 | 0.2321496  | -1.0298254 | 1.2862085  | 1.1076078  |             |                |
| DM06725P2 | 0.23229441 | 1.2467586  | -1.8445051 | -1.5654815 |             |                |
| DM03750P1 | 0.23234573 | -1.0559765 | 1.2573218  | 1.2291483  | DPER\GL208! | XM_002027390.1 |
| DM07196P1 | 0.2323825  | -1.398949  | -1.2101593 | -1.1360544 |             |                |
| DM13185P1 | 0.23240966 | -1.3757085 | -1.2221966 | -1.1721059 |             |                |
| DM10393P1 | 0.23242657 | -1.0536615 | 1.2576569  | -1.4420975 |             |                |
| DM09426P3 | 0.23244804 | 1.0701532  | 1.3760045  | 1.1219475  |             |                |
| DM09898P3 | 0.2324499  | -1.0515864 | -2.0375187 | -1.0501255 |             |                |
| DM02758P3 | 0.23249817 | -1.1251259 | -1.1471524 | -1.1921602 | LOC1001904! | XM_002194785.1 |
| DM08434P2 | 0.23252039 | 2.1130965  | -1.9075454 | 3.2702694  |             |                |
| DM09394P1 | 0.23275544 | 1.0491381  | 1.0375985  | -1.4176316 | BM1_35510   | XM_001898514.1 |
| DM02416P1 | 0.23276755 | -1.2076731 | -1.2414536 | -1.0124148 | TRIADDRAFT  | XM_002112920.1 |
| DM08816P1 | 0.2328312  | 2.0863986  | 1.2855756  | 2.6346927  |             |                |
| DM04970P1 | 0.23289177 | 1.1850929  | -1.1986582 | -1.1955053 |             |                |
| DM10873P1 | 0.23291376 | 1.1081469  | 1.0134321  | 1.3366542  |             |                |
| DM07895P1 | 0.23296545 | -1.1566979 | -1.1142479 | -1.227741  |             |                |
| DM00167P2 | 0.23297757 | 1.1285394  | -1.1662408 | 1.1091597  | LOC1001234! | XM_001607040.1 |
| DM02952P1 | 0.23300959 | -1.0091552 | -1.0461476 | 1.0004804  |             |                |
| DM04902P2 | 0.23301034 | -1.0298402 | -1.1826673 | -1.181892  |             |                |

|           |            |            |            |            |             |                |
|-----------|------------|------------|------------|------------|-------------|----------------|
| DM09170P3 | 0.23306786 | -1.168393  | -1.1457596 | -1.2344085 | PK          | NM_001141703.1 |
| DM10727P2 | 0.23329367 | -1.033505  | 1.0421746  | -1.0818706 |             |                |
| DM10945P1 | 0.23342009 | 1.0394452  | 1.0754441  | -1.1281229 |             |                |
| DM07656P4 | 0.23345996 | 1.1508693  | 1.2360587  | 1.1675981  |             |                |
| DM10112P1 | 0.23362696 | -1.0410022 | -1.0059714 | -1.1859496 | LOC1001135: | XM_001599659.1 |
| DM03096P1 | 0.23364556 | -1.1666313 | -1.02919   | 1.1021127  |             |                |
| DM07409P2 | 0.2336499  | 1.0554211  | 1.1915321  | 1.0266317  |             |                |
| DM10245P2 | 0.23370901 | 1.008813   | -1.1391793 | -1.1353604 |             |                |
| DM07475P2 | 0.23371843 | -1.185846  | -1.1856526 | 1.0282232  |             |                |
| DM04507P1 | 0.23373616 | -1.0520836 | 1.0695577  | -1.154443  |             |                |
| DM09517P1 | 0.23380472 | -1.152586  | 1.0621397  | 1.1740644  |             |                |
| DM09768P2 | 0.23392676 | 1.136222   | 1.308816   | 1.428172   |             |                |
| DM11826P3 | 0.23398085 | 1.0642493  | 1.078151   | -1.0827012 |             |                |
| DM08219P2 | 0.2341896  | 1.0185663  | 1.2668645  | 1.4384574  |             |                |
| DM06629P3 | 0.23422709 | -1.2011167 | 1.2290032  | 1.259594   |             |                |
| DM00017P3 | 0.23423219 | -1.0539136 | -1.1044644 | -1.1964934 | HSDL2       | NM_001104963.1 |
| DM05791P2 | 0.23459572 | -1.0580815 | -1.0805709 | 1.1072413  |             |                |
| DM01187P1 | 0.23466125 | 1.098935   | -1.229884  | -1.1463138 |             |                |
| DM08396P4 | 0.23466212 | 1.3357804  | 1.6045772  | 1.1886674  |             |                |
| DM06298P1 | 0.23473884 | -1.2969323 | -1.1304547 | -1.622197  | DNAJC3      | NM_022232.1    |
| DM12159P1 | 0.23477069 | -1.019304  | 1.2066537  | 1.0734469  |             |                |
| DM01690P2 | 0.23479432 | -1.055165  | -1.003966  | 1.2454004  | MLC-2       | NM_001098343.1 |
| DM08198P4 | 0.23483711 | -1.2530524 | -1.0836043 | 1.3565929  |             |                |
| DM05645P2 | 0.2348467  | 1.3674693  | 1.5330695  | 1.3527458  | DERE\GG183  | XM_001977151.1 |
| DM13212P3 | 0.23486985 | 1.2902153  | 1.4284892  | 1.5253084  |             |                |
| DM13084P4 | 0.23487195 | -1.0673887 | -1.5353533 | -1.1795715 |             |                |
| DM07218P3 | 0.23493008 | -1.1093752 | -1.1839709 | -1.0898838 |             |                |
| DM00540P2 | 0.23498496 | 1.0488864  | -1.3657125 | -1.0203947 | DVIR\GJ2129 | XM_002048867.1 |
| DM15292P3 | 0.23519976 | -1.4538896 | -1.1643338 | -1.6448783 |             |                |
| DM02331P3 | 0.23520562 | -1.0571824 | -1.2565497 | 1.1529016  | DGRI\GH146  | XM_001994657.1 |
| DM12763P1 | 0.23520574 | -1.0557492 | 1.085588   | -1.1455686 |             |                |
| DM00939P3 | 0.23522219 | -1.0646378 | 1.1243433  | 1.0602107  | EIF2B4      | NM_001127356.1 |
| DM04160P1 | 0.23526493 | 1.180031   | 1.1851088  | 1.5179319  | PHYPADRAFT  | XM_001761248.1 |
| DM03906P1 | 0.2354399  | -1.1057975 | -1.1390812 | -1.1143671 | NEMVEDRAFT  | XM_001624744.1 |
| DM11646P1 | 0.23551396 | -1.03313   | -1.0694075 | 1.0846428  | DMOJ\GI208  | XM_002005991.1 |
| DM03053P1 | 0.23560412 | -1.1660389 | -1.0300084 | 1.0457538  | DBIB        | NM_001097111.1 |
| DM06388P3 | 0.23563582 | -1.1136528 | -1.0090015 | 1.1198543  | LOC724531   | XM_001119886.1 |
| DM01773P1 | 0.23568022 | -1.0120969 | -1.1273121 | -1.225379  | LOC1000149  | XM_001364409.1 |
| DM15257P1 | 0.23568022 | 1.0846034  | 1.1719065  | 1.1884934  |             |                |
| DM12736P1 | 0.23571754 | 1.2538706  | 1.0633872  | 1.0260649  | LOC1000756  | XM_001507076.1 |
| DM13592P1 | 0.23575547 | -1.0993081 | -1.877339  | -1.2125044 |             |                |
| DM05396P3 | 0.23588017 | -1.1013277 | -1.2307454 | 1.0695976  |             |                |
| DM01482P1 | 0.23602927 | -1.0092318 | 1.0003527  | -1.1807548 | DWIL\GK166  | XM_002062403.1 |
| DM04704P1 | 0.23607011 | 1.1727107  | -1.0534872 | 1.0927086  |             |                |
| DM05167P3 | 0.23609334 | -1.0030963 | -1.1424539 | -1.3380071 |             |                |
| DM01470P1 | 0.23611084 | 1.3223245  | -1.174258  | 1.0294278  | NEMVEDRAFT  | XM_001634435.1 |
| DM10515P3 | 0.23611297 | 1.067049   | -1.0443168 | 1.340685   |             |                |
| DM06386P1 | 0.23614058 | -1.0417839 | 1.0848209  | -1.0046506 | BRAFLDRAFT  | XM_002586218.1 |
| DM03910P2 | 0.23623255 | 1.0315562  | -1.0225754 | -1.0953368 |             |                |
| DM15288P2 | 0.23624904 | -1.1894934 | -1.1324682 | -1.1180048 |             |                |

|           |            |            |            |            |             |                |
|-----------|------------|------------|------------|------------|-------------|----------------|
| DM06881P4 | 0.23633018 | -1.1814582 | -1.2200739 | -1.565602  |             |                |
| DM08300P1 | 0.23633255 | 1.1181495  | -1.5548161 | 1.2296867  |             |                |
| DM09816P3 | 0.23634957 | 1.0785036  | 1.1055797  | 1.2169893  |             |                |
| DM08694P1 | 0.23635182 | 1.1288575  | 1.0179876  | 1.3717628  |             |                |
| DM02152P1 | 0.23640196 | 1.0323362  | -1.4995033 | 1.309621   | DYAK\GE224  | XM_002095538.1 |
| DM07624P1 | 0.23640396 | -1.0344119 | 1.1767695  | -1.0571604 |             |                |
| DM12380P1 | 0.23642772 | -1.0138837 | -1.008608  | -1.0758561 |             |                |
| DM02129P1 | 0.23649314 | 1.0286909  | 1.2578799  | -1.3611486 |             |                |
| DM10413P2 | 0.23655257 | 1.3189226  | 1.352009   | 1.1848447  |             |                |
| DM10251P2 | 0.23655456 | 1.051219   | 1.1767229  | 1.0627441  |             |                |
| DM11096P4 | 0.23657647 | 1.0684391  | 1.2633691  | -1.0067544 |             |                |
| DM15227P1 | 0.2366364  | -1.1727937 | -1.0695399 | 1.128174   |             |                |
| DM10512P3 | 0.23667733 | 1.0585469  | -1.2313347 | 1.0646514  |             |                |
| DM10601P2 | 0.23672578 | 1.0523156  | 1.0029905  | 1.12673    |             |                |
| DM10411P3 | 0.23679139 | 1.8164264  | 3.7455924  | 1.6135619  | THAPSDRAFT  | XM_002285900.1 |
| DM01934P4 | 0.23682432 | -1.1532662 | -1.8378471 | 1.1352582  | DPER\GL2157 | XM_002017317.1 |
| DM08825P1 | 0.23688693 | 1.3246049  | 1.1055455  | 1.0388963  |             |                |
| DM07038P1 | 0.23691562 | -1.1595464 | -1.2135513 | 1.5518699  |             |                |
| DM01504P1 | 0.23693341 | 1.023745   | 1.0630279  | 1.1398395  | ACADS       | NM_001142870.1 |
| DM02273P1 | 0.23696712 | 1.0711462  | 1.2681707  | 1.1212976  | DESAT1      | XM_002097363.1 |
| DM14570P2 | 0.23734735 | -1.2016398 | 1.0520253  | 1.0486559  |             |                |
| DM05924P2 | 0.2373811  | -1.0306399 | 1.1249208  | 1.2123619  | LOC1001213  | XM_001604899.1 |
| DM00095P4 | 0.23742074 | -1.1082078 | -1.0797275 | -1.1288005 | LOC1002046  | XM_002158396.1 |
| DM00684P2 | 0.23747145 | -1.0628097 | 1.1079458  | -1.1056576 |             |                |
| DM12266P1 | 0.23748022 | 1.0489657  | -1.2227533 | -1.0156748 |             |                |
| DM04567P3 | 0.23753545 | 1.089979   | -1.1202497 | -1.2076732 |             |                |
| DM00245P1 | 0.23758051 | 1.0258745  | 1.076936   | 1.1393448  | DPH5        | NM_001017449.1 |
| DM15000P2 | 0.23758252 | -1.1474541 | -1.1870406 | -1.147439  |             |                |
| DM08862P2 | 0.23774564 | 1.0009338  | -1.122392  | -1.1144437 |             |                |
| DM05432P1 | 0.23777114 | 1.0207664  | -1.1453745 | -1.1904149 |             |                |
| DM14270P1 | 0.23778282 | -1.2114265 | -1.2300938 | -1.006616  |             |                |
| DM03028P4 | 0.23793323 | -1.3730886 | -1.093644  | -1.2642093 |             |                |
| DM10116P2 | 0.23804134 | -1.0104961 | 1.4295273  | -1.1386126 |             |                |
| DM06823P3 | 0.23806585 | 1.0092238  | 1.0624559  | -1.0973648 |             |                |
| DM12038P1 | 0.2380866  | -1.1098315 | 1.0493197  | 1.0760658  |             |                |
| DM13861P1 | 0.23815112 | 1.025365   | -1.1878271 | -1.5259224 |             |                |
| DM03189P2 | 0.23831101 | -1.2407355 | -1.0573083 | -1.0074145 |             |                |
| DM02427P3 | 0.23833026 | -1.0825686 | 1.1856767  | 1.062808   | OAT         | XM_001650637.1 |
| DM09532P3 | 0.23850197 | -1.1664478 | 1.0256371  | -1.0854666 |             |                |
| DM04375P1 | 0.23851569 | -1.0333198 | -1.0751154 | -1.1379399 |             |                |
| DM00106P2 | 0.23854616 | 1.0097712  | 1.2624507  | -1.026663  | LOC1002070  | XM_002165471.1 |
| DM02172P1 | 0.23855522 | 1.3351474  | 1.1388769  | 1.0835925  |             |                |
| DM13056P2 | 0.23855737 | -1.2281938 | -1.3646885 | -1.0150883 |             |                |
| DM09534P1 | 0.23860158 | 1.1064562  | -1.0256833 | -1.194307  |             |                |
| DM01755P1 | 0.2386793  | 1.0753888  | 1.3319428  | -1.0597094 |             |                |
| DM11037P3 | 0.23868926 | -1.2203732 | -1.1877126 | -1.6061238 |             |                |
| DM04293P2 | 0.23885183 | 1.1163819  | 1.0861249  | 1.3496124  |             |                |
| DM06872P1 | 0.23889923 | 1.0775023  | -1.0375528 | -1.1679593 |             |                |
| DM12351P1 | 0.23894688 | -1.1275964 | -1.1634125 | -1.0064865 |             |                |
| DM00631P1 | 0.23896757 | 1.0064819  | -1.1382165 | -1.1112422 | LOC1000251  | XM_001376161.1 |

|           |            |            |            |            |             |                |
|-----------|------------|------------|------------|------------|-------------|----------------|
| DM05703P1 | 0.23900275 | 1.2581855  | 1.5680242  | 1.1052785  | LOC1002144  | XM_002156582.1 |
| DM14639P2 | 0.23904954 | 1.308081   | -1.0779592 | 1.5886207  |             |                |
| DM07149P1 | 0.23909698 | 1.1459774  | 1.3683839  | 1.0545202  |             |                |
| DM02891P1 | 0.23915981 | -1.0026224 | 1.0023823  | -1.2150292 |             |                |
| DM07512P3 | 0.23919502 | -1.1293398 | 1.057519   | -1.127147  |             |                |
| DM07023P1 | 0.23922984 | 1.4196779  | -1.0310329 | 1.8718805  |             |                |
| DM12578P2 | 0.23928867 | -1.0576304 | -1.1014503 | 1.0691715  |             |                |
| DM14112P2 | 0.23932552 | 1.0151197  | -1.1265831 | -1.1259443 |             |                |
| DM11022P1 | 0.23942427 | 1.0022719  | -1.030606  | -1.1376082 |             |                |
| DM03590P3 | 0.23944461 | -1.0579044 | -1.1525332 | -1.0404469 |             |                |
| DM07951P2 | 0.23948579 | -1.0888547 | 1.1927756  | -1.099085  |             |                |
| DM06554P2 | 0.23968732 | 1.2439541  | -1.9929919 | 1.1110675  |             |                |
| DM09468P4 | 0.23970376 | 1.0418439  | -1.210578  | 1.048933   |             |                |
| DM07936P1 | 0.23988582 | -1.067455  | -2.993595  | -1.2747431 |             |                |
| DM09363P2 | 0.23989101 | -1.091246  | 1.0143044  | 1.0921816  | AAEL_AAEL01 | XM_001660636.1 |
| DM05823P2 | 0.2398976  | -1.074387  | -1.1297951 | -1.2109969 | DMOJ\GI227  | XM_001999916.1 |
| DM01247P3 | 0.23993541 | -1.0185214 | 1.0844291  | -1.0959549 |             |                |
| DM05092P2 | 0.2399459  | -1.0298177 | -1.2639786 | -1.1529275 | DMOJ\GI155  | XM_002009811.1 |
| DM08033P3 | 0.23996565 | 1.1149782  | -1.2394627 | 1.0738138  |             |                |
| DM14614P1 | 0.23998652 | -1.0570232 | -1.0027738 | -1.0903947 |             |                |
| DM08994P3 | 0.24005865 | -1.2635921 | -1.3679695 | -1.1583315 |             |                |
| DM01717P1 | 0.24012357 | -1.0356957 | -1.1697226 | -1.1173524 | PGK         | XM_395047.3    |
| DM08894P2 | 0.24013078 | -1.0756254 | 1.0157785  | -1.1057221 | PUS10       | NM_144709.2    |
| DM05634P2 | 0.24015598 | 1.0011984  | -1.0551708 | -1.1424859 |             |                |
| DM09688P1 | 0.24017471 | -1.1255647 | -1.079563  | -1.1975648 |             |                |
| DM00813P4 | 0.24020104 | -1.4017034 | -1.2298259 | -1.1608683 | AUT1        | XM_624690.2    |
| DM03727P3 | 0.2402413  | 1.047109   | -1.1004338 | -1.1254239 |             |                |
| DM15270P1 | 0.24042268 | -1.0539937 | -1.0674154 | -1.3232889 |             |                |
| DM14015P3 | 0.24042508 | 1.2864621  | -1.1961013 | 1.22183    |             |                |
| DM13043P2 | 0.24051201 | 1.0722724  | -1.2231915 | 1.1881794  |             |                |
| DM01727P2 | 0.24053165 | -1.1068918 | -1.1216791 | -1.1390927 | DANA\GF195  | XM_001966066.1 |
| DM03796P2 | 0.24057032 | 1.064561   | 1.3190447  | 1.2164874  | DPSE\GA151  | XM_001354337.2 |
| DM03555P2 | 0.24059997 | 1.1899501  | -1.346755  | 1.002318   | SULT        | XM_001651870.1 |
| DM05177P1 | 0.24067287 | 1.0761472  | 1.044479   | 1.3001828  |             |                |
| DM10593P2 | 0.24082977 | -1.037522  | 1.1306602  | 1.1857835  |             |                |
| DM08830P3 | 0.24095906 | 1.0507988  | 1.2151492  | 1.0614487  |             |                |
| DM09760P3 | 0.24106646 | 1.117374   | 1.3024594  | 1.2003863  |             |                |
| DM08212P1 | 0.2410761  | 1.0886395  | 1.4326289  | 1.4350464  |             |                |
| DM14239P1 | 0.2410921  | -1.1369894 | 1.063814   | -1.0712125 |             |                |
| DM00237P2 | 0.24132974 | -1.2809918 | -1.6634516 | -1.3192804 | DWIL\GK170  | XM_002061652.1 |
| DM02910P1 | 0.24152878 | 1.0731593  | -1.1861024 | 1.225707   | DGRI\GH180  | XM_001990709.1 |
| DM05188P3 | 0.24158575 | 1.1341943  | 1.003417   | 1.0898405  |             |                |
| DM06643P3 | 0.24168673 | -1.1555188 | -1.1517072 | -1.1783879 | DSIM\GD251  | XM_002082605.1 |
| DM12010P3 | 0.24171282 | -1.0866356 | -1.3177629 | 1.6657418  |             |                |
| DM06489P1 | 0.24176422 | -1.082124  | 1.0256157  | -1.0019252 |             |                |
| DM08889P1 | 0.2418337  | -1.2425119 | -1.1231375 | 1.5493493  |             |                |
| DM10806P1 | 0.24185877 | 1.052238   | 1.1791695  | 1.6396307  |             |                |
| DM01346P2 | 0.24187353 | -1.2390528 | -1.2319633 | -1.0330949 | LOC1001675  | XM_001951971.1 |
| DM02111P2 | 0.24187735 | 1.0073003  | -1.0125512 | -1.1445777 | FABP4       | NM_001141203.1 |
| DM11961P1 | 0.2419303  | -1.0040219 | -1.2051876 | -1.1013839 |             |                |

|           |            |            |            |            |             |                |
|-----------|------------|------------|------------|------------|-------------|----------------|
| DM08822P1 | 0.2419778  | -1.0093949 | 1.166026   | -1.0028772 |             |                |
| DM02501P1 | 0.24199231 | -1.1681184 | -1.0714101 | 1.0969884  | LOC712955   | XM_001111420.1 |
| DM05837P4 | 0.24201778 | -1.0700572 | -1.0521224 | -1.1680857 | MONBRDRAF   | XM_001746122.1 |
| DM05908P3 | 0.24208923 | -1.050568  | 1.0544074  | 1.0244012  | TFIID8      | NM_001162578.1 |
| DM02184P2 | 0.24208999 | -1.0545261 | -1.0731716 | -1.1914135 | DDX47       | NM_001007853.1 |
| DM00962P4 | 0.24211726 | -1.5968181 | -1.4483134 | -1.5483364 |             |                |
| DM12597P3 | 0.24214056 | 1.0471286  | -1.254159  | -1.0469285 |             |                |
| DM05667P1 | 0.24219866 | 1.088688   | -1.0190101 | -1.1958339 |             |                |
| DM00205P1 | 0.24242325 | 1.0794384  | -1.2068212 | -1.0397884 | DERE\GG126  | XM_001982546.1 |
| DM06645P1 | 0.24246953 | 1.0006027  | 1.262203   | 1.288004   | DGRI\GH226  | XM_001993992.1 |
| DM12156P1 | 0.24249631 | -1.0091386 | 1.1469185  | -1.0122427 |             |                |
| DM04338P2 | 0.24251391 | -1.0186362 | -1.1303573 | 1.3046162  |             |                |
| DM05299P4 | 0.24258904 | -1.5974077 | -1.7944137 | -1.4755238 |             |                |
| DM05769P2 | 0.24266253 | -1.1897694 | -1.556005  | -1.0282446 |             |                |
| DM12761P2 | 0.24267262 | 1.1287647  | -1.0730982 | 1.221829   |             |                |
| DM09666P4 | 0.24279809 | 1.3033582  | 1.2324859  | -1.2521807 |             |                |
| DM10360P2 | 0.24282885 | 1.0448824  | 1.0993176  | -1.0395963 |             |                |
| DM14262P4 | 0.24294186 | 1.0942018  | 1.4206066  | 2.1380916  | LOC1001233  | XM_001606948.1 |
| DM01868P1 | 0.2429577  | -1.051442  | -1.078154  | 1.0772513  | DYAK\GE194  | XM_002090034.1 |
| DM07772P2 | 0.24299245 | -1.1714351 | -1.0494468 | -1.0349463 |             |                |
| DM11051P4 | 0.24304047 | -1.1177857 | -1.1539085 | -1.3134307 |             |                |
| DM15155P2 | 0.24304494 | -1.1769505 | -1.2163881 | -1.1053597 |             |                |
| DM13094P4 | 0.24304967 | -1.0573581 | -1.0408602 | 1.2252611  |             |                |
| DM11223P3 | 0.24307229 | -1.0048504 | 1.1530342  | 1.0723501  |             |                |
| DM06332P1 | 0.2431418  | -1.0637308 | -1.121423  | -1.1416833 | DVIR\5.8SRR | XR_049439.1    |
| DM00136P1 | 0.24317183 | 1.0245129  | -1.1255499 | 1.1487768  | COL4A1      | NM_001162399.1 |
| DM02345P1 | 0.24317758 | 1.0276755  | -1.0413535 | 1.3243376  | LOC662729   | XR_043135.1    |
| DM01037P2 | 0.24329008 | -1.0146493 | 1.0680153  | 1.1808925  | DYAK\GE243  | XM_002097690.1 |
| DM09205P3 | 0.24329852 | 1.3120586  | 1.301872   | 1.0497586  |             |                |
| DM00345P1 | 0.24344456 | 1.2532747  | 1.151375   | -1.0097317 | BRAFLDRAFT  | XM_002594243.1 |
| DM11930P1 | 0.24347156 | 1.0244815  | 1.1419319  | 1.1090958  |             |                |
| DM00920P3 | 0.24354027 | -1.1341623 | 1.0985624  | -1.0722339 |             |                |
| DM03531P3 | 0.24360144 | 1.1957039  | 1.1570842  | 1.0998377  |             |                |
| DM03661P3 | 0.24374084 | 1.1291976  | 1.0187222  | 1.1046188  | DVIR\GJ2172 | XM_002049645.1 |
| DM14517P2 | 0.24390465 | -1.1189929 | -1.1833615 | 1.0478579  |             |                |
| DM05083P1 | 0.24398895 | 1.0633754  | 1.0574112  | -1.0656354 |             |                |
| DM00552P3 | 0.2440893  | -1.0537611 | -1.0207808 | -1.1600447 | TTLL4       | XM_422058.2    |
| DM00508P4 | 0.2441034  | -1.000408  | 1.0528969  | -1.1333605 | UBE2DNL2    | NM_001081661.1 |
| DM10444P2 | 0.24420173 | -1.0009278 | -1.013393  | 1.1431121  |             |                |
| DM02578P2 | 0.24420315 | 1.0046585  | -1.1187892 | -1.190793  | NT5C2       | NM_001092831.1 |
| DM11427P2 | 0.24420942 | -1.0438268 | 1.0690814  | -1.2242811 |             |                |
| DM03851P1 | 0.24425405 | -1.3620449 | -1.0151052 | -1.1089554 | LOC409062   | XM_392587.3    |
| DM10064P3 | 0.24431293 | -1.1086545 | 1.1104733  | -1.1888038 |             |                |
| DM00875P3 | 0.24431305 | 1.0799099  | -1.2613369 | 1.0205476  | TRIADDRAFT  | XM_002113691.1 |
| DM08481P1 | 0.24455404 | 1.0866618  | 1.3677051  | 1.1528332  |             |                |
| DM05104P3 | 0.24458909 | 1.2727417  | 1.3362384  | 1.1711246  |             |                |
| DM04306P2 | 0.2446597  | -1.2011896 | 1.0508152  | -1.070234  |             |                |
| DM00829P4 | 0.24470028 | -1.1235029 | -1.1167636 | -1.0266527 | AGAP_AGAP0  | XM_314568.3    |
| DM07836P1 | 0.24476142 | 1.1130255  | 1.3305287  | 1.2820454  |             |                |
| DM00367P1 | 0.24493757 | -1.0034332 | 1.1177045  | -1.1507667 | LOC1001681  | XM_001951539.1 |



|           |            |            |            |            |             |                |
|-----------|------------|------------|------------|------------|-------------|----------------|
| DM10454P1 | 0.2450242  | 1.8327477  | 3.9489946  | 1.6162102  |             |                |
| DM13181P1 | 0.2450894  | -1.2058108 | -1.0637931 | 1.07741    |             |                |
| DM11619P3 | 0.24517955 | 1.2049387  | 1.1659418  | 1.2824489  |             |                |
| DM08599P3 | 0.24548915 | -1.2292655 | -1.1024107 | -1.844222  |             |                |
| DM11801P2 | 0.24555984 | 1.0941539  | -1.3550653 | 1.1156573  | LOC1001685  | XM_001945613.1 |
| DM08911P1 | 0.24561845 | -1.3132175 | -1.2439234 | 1.0611883  | RNU1-5      | NR_004424.2    |
| DM00633P1 | 0.24563274 | -1.1002026 | -1.2827027 | -1.2192771 | LOC1001680  | XM_001945298.1 |
| DM06835P1 | 0.2458697  | 1.0822978  | 1.022309   | 1.0433707  |             |                |
| DM06473P3 | 0.2458853  | -1.462435  | 1.1257179  | 1.0081123  |             |                |
| DM05555P4 | 0.24593157 | -1.0529894 | 1.1672552  | 1.1488581  |             |                |
| DM11713P1 | 0.24598405 | -1.0672208 | -1.0475887 | 1.1106954  |             |                |
| DM07044P2 | 0.24606091 | -1.0330484 | 1.0675722  | -1.1451075 |             |                |
| DM14624P2 | 0.24610761 | -1.0754558 | -1.1609609 | 1.1100589  | DVIR\GJ2412 | XM_002051945.1 |
| DM07480P2 | 0.24613379 | -1.5909867 | -1.7554492 | -1.4678955 |             |                |
| DM14836P3 | 0.24616024 | -1.2047966 | 1.0719504  | 1.187557   | DYAK\GE134  | XM_002090949.1 |
| DM12555P4 | 0.24626373 | -1.1861823 | 1.0781884  | -1.0212314 |             |                |
| DM07174P1 | 0.24628928 | -1.0732358 | -1.4145321 | 1.6456004  | LOC1001657  | NM_001134286.1 |
| DM09961P2 | 0.24640752 | 1.0180978  | 1.1788387  | 1.0011466  |             |                |
| DM00280P2 | 0.24678579 | -1.3327987 | -1.2708114 | -1.0839459 | LOC1000499  | XM_001488031.2 |
| DM13002P1 | 0.24697006 | -1.2336929 | -1.0210364 | 1.0808061  |             |                |
| DM03368P1 | 0.2471178  | -1.1157469 | -1.1476191 | -1.3326432 |             |                |
| DM12419P1 | 0.2474929  | 1.1740422  | -1.1388907 | 1.7583271  |             |                |
| DM02847P1 | 0.2475245  | -1.1352241 | 1.0535704  | 1.1042225  |             |                |
| DM05632P3 | 0.24756984 | -1.1787264 | -1.1831068 | 1.1834525  |             |                |
| DM14349P3 | 0.24759291 | -1.1297526 | -1.2500516 | 1.0658157  |             |                |
| DM04990P4 | 0.24763192 | -1.00586   | -1.1149061 | -1.2628894 |             |                |
| DM06475P2 | 0.24764113 | 1.1524594  | 1.3817421  | 1.0910339  |             |                |
| DM10635P3 | 0.24768844 | -1.0401467 | -1.1835667 | 1.2179675  |             |                |
| DM06860P2 | 0.24769415 | 1.0784423  | -1.0090778 | -1.0754393 |             |                |
| DM13813P1 | 0.24774899 | 1.3239431  | 1.7895097  | -1.0269458 |             |                |
| DM12455P1 | 0.24780202 | 1.1439171  | 1.2140497  | 1.1053797  |             |                |
| DM13906P3 | 0.24793483 | -1.0757241 | 1.1365534  | 1.233013   |             |                |
| DM10795P3 | 0.24795052 | 1.1057696  | 1.0037775  | 1.5215164  |             |                |
| DM12941P2 | 0.24803266 | -1.1323092 | 1.1259917  | 1.2855586  |             |                |
| DM07620P2 | 0.2480943  | 1.2186348  | 1.4016483  | 1.4784582  | CP7         | NM_001134294.2 |
| DM14086P1 | 0.24812533 | -1.033564  | 1.1329024  | 1.0517876  |             |                |
| DM10218P3 | 0.24815895 | 1.1790764  | -1.6051377 | 1.1173471  |             |                |
| DM05761P3 | 0.24817894 | 1.7419722  | 3.0163283  | -1.0603417 |             |                |
| DM04559P1 | 0.24825568 | -1.0902883 | -1.3289406 | -1.513008  |             |                |
| DM15284P2 | 0.24825671 | 1.4148448  | 1.3149952  | -1.0107139 |             |                |
| DM02104P3 | 0.24838075 | 1.5026834  | -1.1846237 | -1.3400558 | DMOJ\GI182  | XM_002004081.1 |
| DM08247P3 | 0.24841557 | -1.2885412 | -1.4406707 | 1.1081655  |             |                |
| DM11401P3 | 0.24852408 | -1.0010331 | 1.1585287  | 1.0002311  |             |                |
| DM01965P2 | 0.24853694 | -1.0355347 | -1.0474597 | -1.1472826 | RACG        | XM_001647742.1 |
| DM06440P1 | 0.24856529 | 1.1925057  | 1.0952591  | 1.8204169  | UBXN1       | NM_001162583.1 |
| DM03547P2 | 0.24867071 | 1.0284404  | 1.1359859  | -1.118413  |             |                |
| DM05090P1 | 0.24867591 | 1.0440383  | -1.0264486 | 1.112492   |             |                |
| DM09869P1 | 0.24872689 | 1.1467557  | -1.0303736 | -1.1526676 |             |                |
| DM04932P3 | 0.24880102 | 1.3205796  | 1.3146623  | 1.0596523  |             |                |
| DM12728P2 | 0.24880427 | 1.1426845  | 1.0085074  | 1.3761619  |             |                |

|           |            |            |            |            |              |                |
|-----------|------------|------------|------------|------------|--------------|----------------|
| DM09979P2 | 0.24889131 | -1.0056069 | 1.0861398  | -1.2362003 |              |                |
| DM08552P4 | 0.2489876  | -1.1063006 | -1.1946912 | -1.1648076 |              |                |
| DM05271P1 | 0.2490053  | -1.2633353 | -1.1417627 | -1.3358973 |              |                |
| DM09710P2 | 0.24904892 | 1.0071049  | 1.0177741  | 1.2767099  |              |                |
| DM04515P2 | 0.24904917 | -1.0041537 | 1.1581926  | 1.1180091  |              |                |
| DM11490P3 | 0.24924736 | -1.212529  | -1.1541843 | -1.1329933 |              |                |
| DM00456P2 | 0.24939433 | 1.0540074  | -1.1164049 | 1.1841013  | ODC          | XM_001855873.1 |
| DM08534P2 | 0.24943577 | -1.1188402 | -1.093458  | -1.2361101 |              |                |
| DM08555P1 | 0.24953066 | 1.0082844  | -1.011754  | 1.1354418  |              |                |
| DM10673P2 | 0.24965675 | -1.0402745 | -1.0602896 | -1.208913  |              |                |
| DM11186P2 | 0.24973658 | 1.0660582  | -1.1799105 | -1.0864425 |              |                |
| DM15250P2 | 0.24980468 | -1.1187823 | -1.0922124 | -1.2020963 |              |                |
| DM14420P2 | 0.2498668  | 1.09242    | 1.3458556  | 1.39655    |              |                |
| DM02714P3 | 0.24994458 | -1.1340619 | 1.0409197  | 1.1058772  | GOT1         | NM_001135449.2 |
| DM03605P3 | 0.24998571 | 1.0615757  | 1.1750432  | 1.0236179  |              |                |
| DM07569P1 | 0.25000608 | -1.2838905 | -1.5404348 | -1.0188562 |              |                |
| DM07521P4 | 0.25002918 | 1.0726037  | -1.0480062 | -1.1026627 |              |                |
| DM01822P3 | 0.25019425 | 1.0377843  | -1.0532916 | -1.1214359 | STA          | NM_166890.2    |
| DM00858P1 | 0.2502383  | 1.0401179  | -1.1039311 | -1.1286443 | LOC1001618   | XM_001943504.1 |
| DM01751P1 | 0.25024965 | 1.0123111  | -1.1238805 | -1.0699071 | ACO2         | NM_001092794.1 |
| DM06075P3 | 0.25025108 | -1.0063597 | -1.140419  | 1.0988882  |              |                |
| DM03382P3 | 0.2504751  | 1.3919387  | 1.0863057  | 1.2481534  |              |                |
| DM04387P3 | 0.25054613 | 1.1606276  | 1.3925273  | 1.321686   |              |                |
| DM07134P1 | 0.25055227 | 1.1962079  | 1.3532575  | 1.437177   |              |                |
| DM01242P3 | 0.2505907  | -1.1436923 | 1.0399853  | -1.1596788 | LOC1002307   | XM_002190164.1 |
| DM04164P1 | 0.2506581  | 1.1862319  | 1.3296132  | 1.2526453  |              |                |
| DM08770P3 | 0.25068963 | 1.0552691  | 1.1734277  | 1.0038813  |              |                |
| DM10365P3 | 0.2507192  | -1.100494  | -1.0691307 | 1.6787385  |              |                |
| DM09103P1 | 0.2507544  | 1.0904529  | -1.3805542 | -1.1035938 |              |                |
| DM08008P3 | 0.25077087 | 1.2573248  | 1.2983869  | 1.3453465  |              |                |
| DM04927P2 | 0.25081798 | 1.1211126  | 1.1301087  | -1.0331012 | SLC44A5      | XM_608611.3    |
| DM07687P2 | 0.25084522 | 1.1038169  | -1.0622874 | -1.3215725 |              |                |
| DM01849P2 | 0.25109664 | 1.037837   | 1.0937487  | 1.157019   | LOC1002124   | XM_002160259.1 |
| DM08263P2 | 0.25112635 | 1.1182896  | 1.0888594  | 1.3102324  |              |                |
| DM09800P2 | 0.25112754 | -1.0412749 | -1.8044412 | 1.0182774  |              |                |
| DM00182P3 | 0.251233   | -1.0635425 | 1.0785682  | -1.0815656 | LOC476790    | XM_537245.2    |
| DM04891P1 | 0.25154808 | -1.2539915 | -1.0834118 | -1.1966004 |              |                |
| DM04926P3 | 0.25164807 | 1.113217   | 1.0871651  | -1.0380714 |              |                |
| DM03656P2 | 0.25166368 | -1.1238724 | -1.1883531 | -1.1082338 |              |                |
| DM08877P3 | 0.25176722 | -1.0353363 | 1.0341176  | 1.1081351  |              |                |
| DM00981P2 | 0.25188708 | -1.4413494 | -1.2706013 | -1.896013  |              |                |
| DM03148P2 | 0.25190586 | 1.1475314  | 1.055174   | 1.1634815  |              |                |
| DM14704P1 | 0.2522058  | -1.027914  | -1.0087532 | 1.1843679  |              |                |
| DM07228P1 | 0.2522576  | -1.2714182 | -1.2137507 | -1.3796104 |              |                |
| DM07011P4 | 0.25234133 | 1.0804117  | 1.4594158  | 1.3748406  |              |                |
| DM11380P1 | 0.25239855 | 1.2846226  | 1.4741229  | -1.0754446 |              |                |
| DM00339P3 | 0.25246325 | 1.0103406  | -1.0122907 | 1.0940555  | CPIPJ_CPIJ01 | XM_001863085.1 |
| DM00665P3 | 0.2525305  | -1.11443   | 1.074711   | -1.087312  | LOC657189    | XM_963660.2    |
| DM03380P3 | 0.2525672  | -1.1289238 | -1.1182957 | 1.1104026  | DVIR\GJ1445  | XM_002058462.1 |
| DM13434P1 | 0.2525951  | -1.200111  | 1.0025449  | -1.1686403 |              |                |

|           |            |            |            |            |                             |
|-----------|------------|------------|------------|------------|-----------------------------|
| DM14783P3 | 0.25260127 | -1.047336  | -1.0840281 | -1.198714  |                             |
| DM12726P1 | 0.25260866 | 1.0537275  | -1.1795834 | 1.0239114  |                             |
| DM09835P3 | 0.2526139  | 1.3137978  | 2.4190276  | 1.907154   | DERE\GG242 XM_001968870.1   |
| DM12198P2 | 0.25265563 | 1.1991677  | -1.2119304 | -1.3281171 |                             |
| DM09755P4 | 0.25266537 | -1.0179245 | -1.2371247 | -1.0116037 |                             |
| DM01952P1 | 0.25267246 | -1.0799848 | -1.0844773 | 1.2088028  | DGRIV\GH226: XM_001995396.1 |
| DM02354P1 | 0.2526822  | 1.2798563  | 1.214937   | 1.1105772  | ATP1A XM_001662168.1        |
| DM04976P2 | 0.25274673 | 1.2102773  | -1.7868052 | 1.1117798  | DPER\GL162: XM_002027804.1  |
| DM04418P2 | 0.25282007 | -1.0380828 | -1.1145617 | 1.0919544  |                             |
| DM05246P3 | 0.25285536 | 1.4135443  | 1.1818873  | -1.0576034 |                             |
| DM04006P3 | 0.25292608 | -1.0269036 | 1.1021007  | 1.113331   |                             |
| DM11813P1 | 0.25294873 | 1.0284129  | 1.2430308  | -1.0255795 |                             |
| DM11369P2 | 0.2530498  | 2.2344747  | -1.8791579 | 1.6974561  |                             |
| DM05241P2 | 0.25318107 | 1.0741003  | -1.1929499 | 1.0655013  |                             |
| DM04224P1 | 0.2531878  | -1.2380284 | -1.2812642 | -1.1725961 |                             |
| DM02339P1 | 0.25334617 | -1.2333137 | -1.2092227 | -1.3470354 | LOC1000630: XM_001494448.2  |
| DM11513P2 | 0.25335    | -1.1010205 | -1.1394643 | -1.189733  | LOC1001655: XM_001950795.1  |
| DM06154P2 | 0.253522   | 1.1547861  | 2.0973308  | -1.2392845 | LOC1001232: XM_001606800.1  |
| DM08164P2 | 0.25354815 | -1.0497007 | -1.3803847 | 1.2115377  |                             |
| DM00794P2 | 0.25362748 | 1.1488383  | 1.1699843  | 1.0786895  | BM1_05545 XM_001892548.1    |
| DM03314P2 | 0.25384006 | -1.2293494 | -1.2571201 | -1.060233  | LOC663582 XM_969622.2       |
| DM02457P3 | 0.25384378 | -1.124686  | -1.0153188 | 1.2166754  | LOC408308 XM_391859.3       |
| DM04358P1 | 0.253895   | 1.1564116  | 1.2877116  | 1.1780248  |                             |
| DM10587P2 | 0.25413266 | -1.2200145 | -1.0009503 | -1.1941026 |                             |
| DM07662P1 | 0.2542887  | -1.3717821 | -1.3150635 | -1.611243  |                             |
| DM10978P3 | 0.25429848 | 1.0693936  | -1.0247142 | 1.1899067  |                             |
| DM12422P1 | 0.25432718 | 1.1485837  | 1.0215794  | 1.0638999  |                             |
| DM10344P2 | 0.25446677 | 1.1598024  | -1.4730219 | -1.1297287 |                             |
| DM10849P3 | 0.25453058 | 1.207448   | -1.1203498 | 1.2345569  |                             |
| DM04157P2 | 0.2546864  | -1.2077609 | 1.008871   | -1.0900527 |                             |
| DM02062P3 | 0.25471288 | -1.1846002 | -1.0133762 | 1.1175507  | LOC1001192: XM_001603018.1  |
| DM01977P3 | 0.25472084 | 1.0791245  | 1.0234246  | -1.1164552 | IPOB3 XM_001859000.1        |
| DM10438P1 | 0.25480387 | -1.0080448 | 1.1201892  | 1.1190667  |                             |
| DM00221P3 | 0.25501868 | -1.0034683 | -1.0486268 | -1.178243  | LOC1001648: XM_001948126.1  |
| DM00741P1 | 0.25503817 | 1.1199454  | -1.0400574 | -1.0660969 | CG4288 NM_169898.1          |
| DM08965P1 | 0.25504917 | -1.15297   | -1.3014171 | -1.2027045 |                             |
| DM10852P2 | 0.25520033 | 1.0399253  | -1.047739  | -1.1189394 |                             |
| DM13839P3 | 0.25520205 | 1.0881292  | -1.3739556 | -1.3159865 |                             |
| DM02591P2 | 0.2556059  | 1.0813886  | 1.1036481  | -1.0997767 |                             |
| DM00177P4 | 0.2556136  | -1.0166506 | 1.0527658  | -1.1102729 | ZDHHC8 NM_001044406.1       |
| DM02006P3 | 0.25570658 | -1.1642232 | 1.0460044  | 1.0616188  | CSTF2 NM_001130235.1        |
| DM06812P2 | 0.25581378 | -1.410172  | -1.1055112 | -1.2691786 |                             |
| DM11844P4 | 0.25582576 | -1.0354066 | -1.0775276 | 1.1205481  |                             |
| DM07696P2 | 0.25601158 | -1.2273834 | -1.0914098 | 1.0627877  |                             |
| DM08259P2 | 0.25608137 | 1.0702051  | 1.1267524  | 1.1276511  |                             |
| DM12471P3 | 0.2560911  | -1.084688  | -1.1231754 | -1.174044  |                             |
| DM05925P4 | 0.25619736 | -1.0253168 | -1.0741085 | 1.0625705  |                             |
| DM03963P2 | 0.25626227 | -1.188863  | -1.0221398 | -1.136765  |                             |
| DM07695P3 | 0.25638297 | 1.003015   | 1.2134348  | -1.0356318 |                             |
| DM00476P3 | 0.25640932 | 1.0292872  | 1.0648565  | 1.0894347  | LOC552145 XM_624524.2       |

|           |            |            |            |            |            |                |
|-----------|------------|------------|------------|------------|------------|----------------|
| DM03125P2 | 0.25660893 | 1.1197972  | 1.2316835  | -1.2460814 |            |                |
| DM04740P2 | 0.25684607 | 1.5332379  | 2.0323138  | 1.1606532  |            |                |
| DM13673P4 | 0.2568501  | -1.1142308 | 1.0477208  | 1.3623528  |            |                |
| DM02739P4 | 0.25701633 | -1.0351397 | -1.0135782 | -1.1711863 | LOC1000289 | XM_001378821.1 |
| DM11959P2 | 0.25702766 | 1.0384325  | 1.0101647  | 1.1750172  |            |                |
| DM05693P3 | 0.25719428 | 1.0391575  | 1.0564348  | 1.2203724  |            |                |
| DM10421P1 | 0.25724724 | 1.1228505  | 1.3117136  | -1.124868  |            |                |
| DM07750P1 | 0.25727072 | -1.0911857 | 1.0909069  | -1.0638224 |            |                |
| DM11731P1 | 0.2572962  | 1.0289454  | -1.0141188 | -1.1867332 |            |                |
| DM12392P1 | 0.25735947 | 1.1918405  | 1.1867226  | -1.0063478 |            |                |
| DM04119P3 | 0.25752038 | -1.1192064 | -1.0136963 | 1.0213526  | AGAP_AGAP0 | XM_553074.3    |
| DM00338P1 | 0.25754574 | -1.0000093 | 1.0278736  | 1.0871125  | LOC751839  | NM_001048214.1 |
| DM09596P2 | 0.25764248 | 1.0110866  | 1.0374141  | -1.2774423 |            |                |
| DM05602P3 | 0.25764874 | 1.0377426  | -1.2131145 | -1.344718  |            |                |
| DM11728P3 | 0.25768387 | 1.0591309  | 1.1926095  | -1.0310527 |            |                |
| DM14259P1 | 0.25778797 | 1.19452    | 1.0111893  | 1.2374854  |            |                |
| DM08223P1 | 0.25779882 | -1.0942485 | -1.2827123 | 1.071789   |            |                |
| DM14387P3 | 0.25790602 | -1.2192518 | -1.6252664 | -1.1821172 |            |                |
| DM06571P2 | 0.25796032 | 1.409166   | -1.8419417 | 1.1548725  |            |                |
| DM14753P3 | 0.2580285  | -1.1154169 | -1.2002321 | -1.0397018 |            |                |
| DM07209P4 | 0.25807586 | 1.0413247  | 1.3710743  | -1.6861311 |            |                |
| DM01213P1 | 0.25816524 | 1.0972472  | -1.0149926 | -1.0842164 | PYGL       | NM_022268.1    |
| DM11356P1 | 0.25818104 | -1.068019  | -1.0109687 | 1.0978993  |            |                |
| DM12418P1 | 0.2582142  | -1.4887694 | -1.2625325 | -1.0710883 |            |                |
| DM04491P4 | 0.25822747 | -1.017731  | 1.0259883  | -1.1078899 |            |                |
| DM00608P2 | 0.25827044 | -1.3248057 | 1.2383496  | 1.012345   | PHYPADRAFT | XM_001785922.1 |
| DM06210P1 | 0.25828302 | 1.0554379  | 1.162416   | 1.1799482  | ISCW_ISCWC | XM_002413903.1 |
| DM11899P1 | 0.25828904 | 1.1402025  | 1.2062458  | -1.040677  |            |                |
| DM03575P1 | 0.2583814  | -1.0427296 | -1.0032463 | -1.2475728 |            |                |
| DM03263P4 | 0.2585539  | 1.0723512  | 1.303844   | -1.0410174 |            |                |
| DM08863P3 | 0.25857988 | 1.099635   | -2.3163424 | -1.368801  |            |                |
| DM05533P2 | 0.25862932 | -1.132343  | -1.6831236 | 1.0999542  |            |                |
| DM05565P2 | 0.25873628 | -1.0922567 | 1.2075251  | 1.1666725  |            |                |
| DM08775P1 | 0.2588132  | -1.145027  | -1.8523717 | -1.1165667 |            |                |
| DM04153P1 | 0.25887355 | -1.0066324 | -1.0409917 | -1.2015834 | YY1-A      | NM_001087615.1 |
| DM01833P1 | 0.25893202 | -1.0041822 | -1.0281557 | 1.199921   | RPS6       | NM_001172390.1 |
| DM14803P2 | 0.25904322 | 1.0286301  | -1.0464404 | 1.0908719  | LOC662420  | XM_968517.2    |
| DM03896P3 | 0.25909218 | -1.0881917 | -1.1420051 | -1.1102751 | TWF1       | NM_001094014.1 |
| DM01228P3 | 0.25911096 | -1.0226747 | 1.1187915  | 1.0978091  | LOC1001775 | XM_002131304.1 |
| DM09643P1 | 0.25917444 | 1.0984236  | 1.1789134  | 1.1373258  |            |                |
| DM13414P2 | 0.25918892 | -1.1477935 | 1.1211452  | 1.1463934  |            |                |
| DM00076P4 | 0.25921026 | 1.2873428  | 1.0980188  | -1.146569  | ASS1       | NM_173892.3    |
| DM03416P2 | 0.25924975 | 1.1791211  | 1.0534533  | 1.031141   | LOC1001682 | XM_001943348.1 |
| DM01816P1 | 0.2592696  | -1.2601604 | -1.402707  | 1.0038009  | THETATRY   | NM_078969.4    |
| DM13044P1 | 0.2592802  | -1.0325915 | -1.2445086 | -1.3211194 |            |                |
| DM00724P2 | 0.2593299  | 1.0434487  | -1.1378214 | -1.1192132 | LOC659957  | XM_961313.2    |
| DM08058P3 | 0.2593339  | 1.0592041  | 1.062615   | -1.2280749 |            |                |
| DM07878P1 | 0.2593867  | 1.0661684  | 1.0851551  | -1.0383286 |            |                |
| DM08576P3 | 0.25947344 | -1.2404542 | 1.1526383  | -1.4093397 | DANA\GF191 | XM_001966737.1 |
| DM01432P2 | 0.2595156  | -1.1097965 | 1.0674982  | -1.0652649 | NUDT2      | NM_001006917.1 |

|           |            |            |            |            |                           |
|-----------|------------|------------|------------|------------|---------------------------|
| DM11210P1 | 0.25961316 | 1.0657599  | -1.0232264 | 1.141611   |                           |
| DM07516P3 | 0.2596391  | -1.0716184 | 1.0082464  | -1.1381544 |                           |
| DM09176P4 | 0.25964287 | -1.1459624 | -1.1497656 | -1.0042553 |                           |
| DM10938P3 | 0.25971344 | 1.1307395  | 1.281549   | -1.0374758 |                           |
| DM08467P1 | 0.25973573 | -1.112424  | -1.1330115 | -1.044076  |                           |
| DM04658P3 | 0.2598285  | -1.2076304 | -1.1523104 | -1.170543  |                           |
| DM00481P3 | 0.25983632 | -1.0879692 | -1.0718508 | -1.004378  | DGR1\GH150 XM_001984286.1 |
| DM12012P1 | 0.2601285  | -1.0431885 | -1.2920287 | -1.2514056 |                           |
| DM09007P1 | 0.26018906 | 1.0615915  | -1.1684203 | -1.243161  |                           |
| DM04402P1 | 0.26021236 | 1.1326765  | 1.435273   | -1.0905565 |                           |
| DM15235P1 | 0.26026002 | -1.0427495 | -1.4086057 | 1.0770717  |                           |
| DM07937P1 | 0.26029596 | -1.1018614 | 1.0400647  | 1.0500964  |                           |
| DM04875P2 | 0.26052642 | -1.1486288 | -1.0862808 | -1.000713  | CYP306A1 NM_001112751.1   |
| DM15195P1 | 0.26060525 | -1.0774875 | -1.0550876 | -1.0822867 | DMOJ\GI207 XM_002005938.1 |
| DM10950P4 | 0.26063234 | -1.0406617 | -1.052363  | 1.2716328  | DMOJ\GI128 XM_002007224.1 |
| DM06023P1 | 0.26066092 | -1.0950001 | 1.0500135  | 1.1295626  | LOC408368 XM_391917.3     |
| DM13530P2 | 0.26072696 | -1.0688686 | -1.1935751 | 1.0411469  |                           |
| DM07546P2 | 0.26073763 | 1.2306186  | -1.1478714 | 1.2524295  |                           |
| DM09516P1 | 0.26078764 | 1.0096262  | -1.2455753 | 1.1516043  |                           |
| DM09002P2 | 0.2609252  | 1.0202099  | -1.1200371 | -1.0202322 |                           |
| DM11627P3 | 0.2609418  | 1.1056204  | 1.0445989  | -1.2467561 |                           |
| DM14903P1 | 0.2609434  | 1.2018651  | -1.0276579 | 1.1769241  |                           |
| DM12676P1 | 0.26096568 | -1.0687803 | -1.4954445 | -1.125302  |                           |
| DM08571P2 | 0.26110533 | 1.1907867  | -1.6429228 | 1.1976262  |                           |
| DM05029P1 | 0.26121968 | -1.1708794 | -1.0908558 | 1.1205115  |                           |
| DM05666P1 | 0.26122952 | -1.1079533 | -1.0631106 | 1.1082348  |                           |
| DM06358P2 | 0.2612429  | 1.0065413  | 1.2366397  | 1.19085    |                           |
| DM07785P1 | 0.26125598 | -1.0361128 | 1.2613541  | 1.4022936  |                           |
| DM04710P1 | 0.26155168 | -1.180229  | 1.0420475  | 1.202081   |                           |
| DM00387P1 | 0.26173052 | -1.1613054 | -1.2189912 | -1.2533814 | PGK XM_395047.3           |
| DM04341P3 | 0.2618314  | 1.3016156  | 1.5157533  | 1.0645739  |                           |
| DM08730P1 | 0.2618632  | 1.2294736  | -1.0400231 | -1.094003  |                           |
| DM05580P3 | 0.26192853 | -1.0189779 | -1.0946167 | -1.2863373 |                           |
| DM12203P2 | 0.2619314  | 1.085362   | 1.1609033  | -1.3015066 | LOC1001225 XM_001606108.1 |
| DM03425P2 | 0.26245183 | -1.0209414 | 1.0337193  | -1.2957495 |                           |
| DM04134P3 | 0.26245955 | 1.1925137  | 1.2678816  | -1.0396076 |                           |
| DM09719P2 | 0.26253015 | -1.1399746 | -1.0092431 | -1.0255041 |                           |
| DM07693P1 | 0.26256418 | -1.1216767 | 1.0735531  | 1.0327274  |                           |
| DM09818P1 | 0.26260322 | 1.1464859  | 1.3091367  | -1.0843766 |                           |
| DM08758P1 | 0.2626306  | 1.0225213  | 1.045248   | -1.1940153 |                           |
| DM00115P3 | 0.26265827 | 1.0288993  | -1.1961048 | -1.1257315 |                           |
| DM01831P2 | 0.26270407 | -1.1612942 | -1.1187985 | -1.0035564 | DPER\GL104 XM_002016578.1 |
| DM15192P1 | 0.2627384  | -1.2600031 | -1.198794  | -1.1170579 |                           |
| DM13245P1 | 0.26276973 | -1.2286756 | 1.03108    | 1.0797906  |                           |
| DM03308P2 | 0.2627918  | -1.0038096 | 1.0193205  | -1.1056557 | LOC1002206 XM_002198585.1 |
| DM15151P2 | 0.26298243 | 1.0541546  | 1.2773395  | 1.3510786  |                           |
| DM14607P3 | 0.26326144 | 1.1216311  | 1.1795565  | 1.4814425  |                           |
| DM07724P1 | 0.26348898 | -1.0679163 | -1.046733  | -1.1483434 |                           |
| DM06867P1 | 0.26355517 | -1.0268062 | -1.085341  | 1.0366137  |                           |
| DM06367P1 | 0.2635893  | -1.000653  | 1.0466499  | 1.1191108  |                           |

|           |            |            |            |            |            |                |
|-----------|------------|------------|------------|------------|------------|----------------|
| DM01393P3 | 0.26374403 | -1.0805808 | -1.1023151 | 1.0299631  | AGL        | XM_422317.2    |
| DM04014P3 | 0.26380116 | -1.0081408 | -1.0641767 | -1.1241136 |            |                |
| DM01598P3 | 0.26388592 | 1.0776647  | -1.1211876 | 1.0448061  | TAGLN      | XM_001652274.1 |
| DM11067P1 | 0.26394185 | 1.0521603  | -1.1839529 | 1.2031298  |            |                |
| DM02408P1 | 0.26407224 | 1.1250272  | -1.1475759 | 1.191612   | LOC1001234 | XM_001607040.1 |
| DM15333P3 | 0.26409632 | 1.006747   | 1.1596792  | 1.1552418  |            |                |
| DM09677P1 | 0.26413363 | -1.0208681 | 1.0820887  | -1.0814667 |            |                |
| DM04689P2 | 0.26416278 | -1.1579945 | -1.1099073 | -1.3038318 | ALG10      | NM_001076189.1 |
| DM07595P3 | 0.26426667 | 1.1148661  | 1.0419769  | -1.0324192 |            |                |
| DM01618P1 | 0.26426724 | -1.0649627 | 1.2476764  | 1.0592126  | LOC1002673 | XM_002264674.1 |
| DM01563P1 | 0.26431286 | -1.0015179 | 1.0377156  | 1.0092527  | LOC1002043 | XR_053877.1    |
| DM02619P1 | 0.26442596 | -1.1485761 | -1.113822  | -1.0038761 | SS1G_04452 | XM_001594594.1 |
| DM10531P3 | 0.2644675  | -1.1789346 | -1.15991   | 1.2048396  |            |                |
| DM07248P1 | 0.26447678 | 1.0943681  | 1.0696505  | -1.1351656 |            |                |
| DM10810P1 | 0.26482996 | 1.2311624  | 1.136953   | -1.2541099 | DERE\GG150 | XM_001979333.1 |
| DM02041P2 | 0.26485792 | -1.2024782 | -1.0856516 | 1.0466058  |            |                |
| DM06121P2 | 0.26486284 | 1.0249051  | -1.1233423 | -1.2747171 | DPH2       | NM_001093249.1 |
| DM05497P3 | 0.26495275 | 1.1089106  | 1.00973    | -1.124143  | DGRI\GH120 | XM_001991330.1 |
| DM04776P1 | 0.2651114  | 1.2604694  | 1.6253195  | 1.1468083  |            |                |
| DM14227P1 | 0.26514935 | -1.4392291 | -1.2463009 | -1.0512094 |            |                |
| DM07639P2 | 0.26516217 | -1.0554817 | 1.1899403  | -1.231627  |            |                |
| DM10374P2 | 0.26516545 | -1.1828933 | -1.0843065 | -1.0086535 |            |                |
| DM01509P4 | 0.26516575 | -1.2712165 | -1.0159122 | 1.10773    | LOC575681  | XM_001189469.1 |
| DM06053P4 | 0.26523975 | -1.1677667 | -1.226166  | -1.2169762 | DWIL\GK155 | XM_002065614.1 |
| DM13099P2 | 0.26530367 | -1.0988265 | 1.0449762  | -1.115993  |            |                |
| DM10395P2 | 0.2653258  | -1.0178224 | -1.2078133 | -1.2941697 |            |                |
| DM13995P3 | 0.26532677 | -1.2324554 | -1.0880588 | 1.0323414  |            |                |
| DM07934P1 | 0.26533005 | 1.1106843  | 1.1662617  | 1.20903    |            |                |
| DM04207P2 | 0.26533225 | -1.0202643 | -1.0819559 | -1.0298771 | NEMVEDRAFT | XM_001633797.1 |
| DM01983P1 | 0.2655174  | -1.062699  | -1.1781994 | -1.0963095 |            |                |
| DM06780P1 | 0.2655795  | 1.2668874  | 1.6019518  | 1.046892   |            |                |
| DM05784P4 | 0.26569188 | -1.1681155 | 1.09361    | -1.0661768 | THAPSDRAFT | XM_002285900.1 |
| DM10529P2 | 0.26570186 | -1.1943514 | -1.4060626 | 1.044415   |            |                |
| DM13170P3 | 0.2657403  | -1.179595  | -1.1495228 | -1.0136007 | PAST1      | XM_396463.3    |
| DM04080P3 | 0.2658276  | -1.0215012 | 1.0049784  | -1.1457767 | LOC1001143 | XM_001607540.1 |
| DM13237P1 | 0.26583225 | -1.0052061 | 1.1047419  | 1.1791831  |            |                |
| DM06318P3 | 0.2660066  | -1.022685  | -1.3967985 | -1.2441558 |            |                |
| DM08391P1 | 0.26604986 | -1.159371  | -2.221113  | -1.076757  |            |                |
| DM00466P2 | 0.26617584 | 1.0189222  | -1.2087619 | -1.5338364 | RAPGAP     | XM_001648639.1 |
| DM00018P3 | 0.2662994  | 1.031313   | -1.0220119 | -1.0784807 | EEF        | XM_001649235.1 |
| DM01803P2 | 0.26631513 | -1.2515535 | 1.0041431  | 1.0811284  | SLC41A2    | NM_001103206.1 |
| DM09560P2 | 0.26640928 | 1.1451342  | 1.1976151  | 1.5994089  |            |                |
| DM02126P4 | 0.26641613 | 1.0388523  | -1.1435332 | -1.019947  | LOC657643  | XM_964090.2    |
| DM03666P4 | 0.26648495 | 1.3091302  | 1.2850626  | 1.1135777  | MGC68542   | NM_001089711.1 |
| DM02074P2 | 0.2664992  | -1.0827307 | -1.1085441 | 1.044181   | DSEC\GM220 | XM_002040912.1 |
| DM12059P1 | 0.26650468 | -1.4522322 | -1.1530907 | -1.1091828 |            |                |
| DM14192P1 | 0.26652223 | -1.4704001 | -1.2989744 | -1.1773229 |            |                |
| DM09552P1 | 0.2665487  | 1.3459616  | -1.0435559 | 1.0352907  |            |                |
| DM14708P3 | 0.26669884 | 1.0114924  | -1.0693927 | 1.180561   |            |                |
| DM02260P3 | 0.26672244 | -1.15827   | -1.1359277 | -1.0620079 | LOC655258  | XM_961787.1    |

|           |            |            |            |            |              |                |
|-----------|------------|------------|------------|------------|--------------|----------------|
| DM05075P3 | 0.26683533 | 1.0135776  | 1.0803794  | 1.1040853  |              |                |
| DM04646P1 | 0.26689792 | -1.0638654 | -1.2292731 | -1.1103754 | CPIPJ_CPIJ01 | XM_001863280.1 |
| DM05599P1 | 0.26703876 | 1.3933487  | -1.0538892 | 1.0022697  | SLC35E3      | NM_001030179.1 |
| DM06484P3 | 0.26708353 | -1.1538973 | -1.2184604 | 1.0101651  |              |                |
| DM11920P3 | 0.2670978  | 1.4240608  | 1.6792641  | 1.4352472  |              |                |
| DM00003P1 | 0.267121   | 1.0942265  | -1.2051334 | -1.1254741 | AGAP_AGAP0   | XM_309158.3    |
| DM03895P1 | 0.2672056  | 1.1400671  | -1.014671  | 1.2962356  |              |                |
| DM11484P1 | 0.26724255 | -1.0208824 | -1.0436964 | 1.1670457  |              |                |
| DM11279P2 | 0.26727828 | -1.0685261 | -1.1614825 | -1.0710521 |              |                |
| DM11519P2 | 0.2673764  | -1.0631095 | -1.1847509 | -1.1345705 |              |                |
| DM01229P3 | 0.2674194  | 1.2157052  | 1.3589206  | 1.0571381  |              |                |
| DM03865P3 | 0.26742876 | -1.0501814 | -1.2184641 | 1.0320851  | DGRI\GH109   | XM_001988074.1 |
| DM14521P1 | 0.2676318  | -1.2617068 | 1.1709824  | 1.0674988  |              |                |
| DM00531P1 | 0.26763374 | -1.0616063 | -1.0679224 | 1.0539923  | DRG2         | XM_001662307.1 |
| DM14161P2 | 0.26769796 | 1.1162127  | 1.2330402  | 1.4284838  |              |                |
| DM09901P1 | 0.2677091  | 1.0055426  | 1.2060641  | 1.0746875  |              |                |
| DM03286P4 | 0.26781076 | -1.0316057 | -1.1057347 | -1.1310323 |              |                |
| DM10567P2 | 0.26781932 | -1.1014647 | 1.049968   | 1.2114102  |              |                |
| DM09673P1 | 0.2678504  | 1.3474308  | 1.354203   | 1.1518452  |              |                |
| DM02913P3 | 0.26797676 | 1.014455   | -1.1069528 | -1.1375152 | DWIL\GK128   | XM_002073993.1 |
| DM15081P3 | 0.26803017 | -1.0637164 | 1.0349927  | 1.1486846  |              |                |
| DM00362P1 | 0.26814914 | -1.2319361 | -1.1685933 | -1.2211517 | ZMAT2        | NM_001135582.1 |
| DM02471P2 | 0.26826677 | -1.0980765 | -1.0263897 | -1.0767739 | BANF1        | NM_205562.1    |
| DM02372P3 | 0.2683019  | 1.0825608  | 1.0487317  | 1.2446228  | UP           | NM_001169273.1 |
| DM10888P3 | 0.268381   | 1.0214206  | 1.0549527  | -1.1303169 |              |                |
| DM11909P1 | 0.2683977  | -1.2235141 | -1.0240742 | -1.3182051 |              |                |
| DM10948P4 | 0.26846495 | -1.1273032 | -1.257176  | 1.0777317  |              |                |
| DM11781P1 | 0.26852217 | -1.1688826 | -1.2892488 | -1.094727  |              |                |
| DM03355P2 | 0.2685769  | -1.0623845 | -1.034124  | -1.1519028 |              |                |
| DM09641P1 | 0.26884505 | -1.1313572 | 1.0338978  | -1.0535138 | LOC413877    | XM_397316.3    |
| DM07589P4 | 0.26884767 | -1.005771  | 1.1157384  | -1.0745078 |              |                |
| DM05975P4 | 0.26900214 | -1.0680186 | -1.0397495 | 1.0470371  |              |                |
| DM07500P2 | 0.26901704 | 1.3502568  | 1.1537739  | 1.275778   |              |                |
| DM07067P4 | 0.26905295 | -1.0077522 | -1.864285  | 1.1605393  |              |                |
| DM07064P3 | 0.26909244 | -1.4189099 | 1.107227   | 1.1591263  |              |                |
| DM13911P3 | 0.26909617 | 1.0826962  | 1.1762782  | 1.4355309  |              |                |
| DM08054P1 | 0.2691166  | -1.0700271 | -1.0600575 | 1.1025263  |              |                |
| DM11779P3 | 0.2691402  | -1.0963544 | 1.2004395  | 1.1828127  |              |                |
| DM14289P3 | 0.26929772 | 1.2972834  | -1.0131882 | 1.4644885  |              |                |
| DM03999P3 | 0.2694803  | -1.0998216 | 1.0070813  | 1.1550581  | DPSE\GA188   | XM_001358039.2 |
| DM06687P1 | 0.26967043 | 1.016762   | -1.0311419 | -1.6075397 | MONBRDRAF    | XM_001746877.1 |
| DM04637P3 | 0.26971358 | 1.2237387  | 1.4093496  | 1.4258127  |              |                |
| DM11252P1 | 0.26978096 | -1.0052024 | -1.0289576 | 1.0880843  |              |                |
| DM07462P3 | 0.26981997 | 1.252848   | 1.1631486  | -1.7471584 |              |                |
| DM07461P4 | 0.2698727  | -1.0088015 | -1.4036386 | 1.3927939  |              |                |
| DM11948P1 | 0.26991227 | 1.171001   | -1.6624663 | -1.1512709 |              |                |
| DM07518P2 | 0.26998162 | -1.1204739 | 1.0070497  | -1.1750476 |              |                |
| DM07617P1 | 0.27025792 | 1.487632   | 2.442835   | 1.0439935  |              |                |
| DM03412P3 | 0.27031708 | 1.0425695  | -1.0967984 | -1.6946791 | AAEL_AAEL0C  | XM_001658041.1 |
| DM14958P2 | 0.27048868 | -1.142381  | -1.1188724 | -1.0749499 |              |                |

|           |            |            |            |            |                             |
|-----------|------------|------------|------------|------------|-----------------------------|
| DM11424P2 | 0.27053    | 1.3009902  | 1.0943859  | 1.9352013  |                             |
| DM02506P2 | 0.27062485 | 1.0274017  | -1.071449  | -1.0686165 | DGRI\GH107 XM_001988129.1   |
| DM00664P2 | 0.2707605  | -1.0949554 | 1.0340744  | 1.1535801  | LOC1001612(XM_001947193.1   |
| DM09884P3 | 0.27084154 | 1.0670125  | -1.128337  | 1.0226104  |                             |
| DM08079P2 | 0.27086207 | 1.0133232  | -1.0957557 | -1.2123417 |                             |
| DM05989P1 | 0.27091274 | -1.0302718 | -1.0787828 | -1.101724  |                             |
| DM10323P1 | 0.2709426  | 1.2115563  | 1.0004078  | 1.034427   |                             |
| DM05155P1 | 0.2710174  | 1.0450449  | 1.093734   | -1.0580148 |                             |
| DM01939P1 | 0.27103686 | -1.0570571 | 1.1565783  | 1.0972495  |                             |
| DM08566P2 | 0.27109393 | 1.014557   | 1.5677137  | 1.2979527  |                             |
| DM03302P1 | 0.27115476 | 1.1858219  | 1.107829   | 1.1506292  | LOC413024 XM_396475.3       |
| DM00686P1 | 0.27115977 | -1.2558799 | -1.1255667 | -1.3694347 | LOC655614 XM_962174.1       |
| DM06931P2 | 0.27123114 | -1.1227998 | 1.0262744  | -1.0381855 |                             |
| DM14997P2 | 0.2717728  | 1.0279412  | 1.1503786  | 1.3888437  |                             |
| DM12966P3 | 0.27180037 | -1.1187682 | 1.079359   | 1.1227247  |                             |
| DM04249P4 | 0.2718385  | 1.0682545  | -1.0648274 | -1.0169814 |                             |
| DM06550P3 | 0.27201527 | 1.2006108  | 1.7937678  | -1.6856812 |                             |
| DM02046P1 | 0.2720306  | -1.0953486 | 1.0938233  | -1.1705184 |                             |
| DM07007P4 | 0.27214116 | 1.021284   | -2.2958577 | -1.311962  |                             |
| DM07014P1 | 0.27215648 | -1.3152213 | -1.6077256 | -1.3382732 |                             |
| DM12028P3 | 0.27223322 | -1.1742998 | 1.0595002  | -1.3688273 |                             |
| DM01840P1 | 0.2722554  | -1.1798599 | -1.1438942 | -1.4009252 | NEMVEDRAFT XM_001629940.1   |
| DM06809P2 | 0.27238008 | -1.2181605 | -1.17316   | 1.2597018  |                             |
| DM00748P2 | 0.27268153 | -1.0031023 | 1.0779867  | -1.1652796 | DPER\GL2134 XM_002028067.1  |
| DM00878P1 | 0.27283165 | -1.2132832 | -1.1051482 | -1.0667408 | AP3M2 XM_539956.2           |
| DM08751P2 | 0.27284074 | -1.0507833 | 1.0753981  | -1.1284915 |                             |
| DM11274P1 | 0.27288777 | -1.1306177 | -1.1339898 | -1.0868578 |                             |
| DM06671P1 | 0.27305332 | -1.0534359 | -1.1623548 | 1.2140887  |                             |
| DM03374P2 | 0.27307132 | -1.0020578 | -1.1738876 | 1.000244   | LOC1000780 XM_001509146.1   |
| DM14766P1 | 0.2733359  | -1.0940188 | 1.1625143  | 1.5214447  |                             |
| DM10772P1 | 0.27338412 | -1.0966827 | 1.0264382  | -1.2436428 |                             |
| DM05106P3 | 0.27340215 | 1.232144   | -1.070022  | -1.0068558 |                             |
| DM14687P3 | 0.27342856 | 1.0398469  | 1.3196926  | 1.1153041  |                             |
| DM07559P3 | 0.2734311  | -1.0915565 | -1.0335603 | 1.0884652  |                             |
| DM00464P1 | 0.27343723 | 1.0010499  | -1.1353892 | 1.0372828  | PFRX NM_167656.1            |
| DM12501P3 | 0.27348587 | 1.4577152  | -1.3368601 | 2.0431786  |                             |
| DM04923P3 | 0.27351245 | -1.0369147 | 1.1401223  | -1.1172848 |                             |
| DM06482P3 | 0.27356207 | -1.0368768 | 1.9627031  | 1.2143059  |                             |
| DM12304P2 | 0.27364305 | 1.0714511  | -1.2610759 | -1.1389167 |                             |
| DM02549P4 | 0.27376124 | -1.0981647 | -1.1785518 | -1.1336061 | LOC1000709 XM_001502048.2   |
| DM02753P2 | 0.2738641  | 1.1280458  | 1.1041071  | 1.0789177  |                             |
| DM06197P3 | 0.27389586 | -1.1697189 | -1.0036259 | 1.146565   | AGAP_AGAP0 XM_312489.3      |
| DM08903P3 | 0.2739174  | 1.1329362  | -1.9379083 | 1.1419867  |                             |
| DM08131P1 | 0.27391797 | 1.7334675  | 2.4597318  | 1.0625024  |                             |
| DM02024P1 | 0.27391908 | -1.4984995 | -1.4921881 | -1.7010167 |                             |
| DM04266P1 | 0.2739202  | -1.1575906 | 1.0462637  | -1.0556333 |                             |
| DM00439P2 | 0.27400658 | -1.0066699 | -1.0885432 | -1.1498015 | CPIPJ_CPIJ01 XM_001863280.1 |
| DM02724P3 | 0.2741193  | -1.0714757 | -1.078043  | -1.1665258 | CPIPJ_CPIJ01 XM_001870928.1 |
| DM05679P1 | 0.27415347 | -1.067384  | 1.0689263  | 1.151907   |                             |
| DM07158P1 | 0.27426538 | 1.0069854  | 1.1103646  | 1.1374881  |                             |



|           |            |            |            |            |              |                |
|-----------|------------|------------|------------|------------|--------------|----------------|
| DM04956P2 | 0.27426666 | 1.3844457  | 1.0156839  | 1.1453973  |              |                |
| DM11879P1 | 0.27459422 | -1.1163522 | 1.0824252  | -1.053459  |              |                |
| DM03838P4 | 0.2745991  | 1.1233497  | 1.303932   | -1.0837699 | DWIL\GK221   | XM_002066036.1 |
| DM00473P2 | 0.27463725 | -1.0306998 | -1.1837332 | -1.1469984 | CPIPJ_CPIJ01 | XM_001863280.1 |
| DM05986P2 | 0.2746576  | -1.0287842 | 1.0101244  | 1.1214464  |              |                |
| DM10517P3 | 0.27466768 | 1.0859551  | 1.1251527  | 1.18818    |              |                |
| DM00784P3 | 0.2747228  | -1.0509835 | 1.1662562  | 1.1962926  | SAP30        | XM_624216.2    |
| DM10723P3 | 0.27477878 | -1.0685669 | -1.291107  | -1.2692791 |              |                |
| DM05470P3 | 0.27482525 | 1.2811584  | 1.5416659  | 1.2195469  |              |                |
| DM12892P1 | 0.27494326 | 1.0550048  | -1.1351304 | -1.0525522 | RECQL5       | NM_001105853.1 |
| DM07749P3 | 0.2749702  | 1.039665   | 1.0445629  | 1.4613992  |              |                |
| DM13573P4 | 0.274998   | 1.0805191  | 1.2399577  | 1.5157542  |              |                |
| DM04129P2 | 0.2750161  | 1.0518026  | 1.011707   | -1.0947446 |              |                |
| DM11825P3 | 0.27506286 | 1.1702809  | 1.4137588  | 1.1065726  |              |                |
| DM05449P3 | 0.27512872 | 1.3567693  | -1.1192299 | 1.6257423  |              |                |
| DM10052P1 | 0.2751526  | 1.0750324  | 1.180587   | -1.0546448 |              |                |
| DM11247P3 | 0.27536276 | 1.0739783  | 1.1836153  | 1.0620034  |              |                |
| DM09543P1 | 0.27543107 | -1.419475  | -1.0429232 | -1.2565066 |              |                |
| DM00505P3 | 0.27553087 | -1.0406455 | -1.0811542 | -1.1496753 | DMOJ\GI124   | XM_002007199.1 |
| DM11460P1 | 0.27556923 | -1.2458286 | -1.0182714 | -1.061902  |              |                |
| DM03713P1 | 0.2755926  | 1.347505   | 1.4368577  | 1.8904502  | AGAP_AGAP0   | XM_316099.4    |
| DM05528P2 | 0.27564263 | -1.0504849 | 1.2389302  | 1.1914333  |              |                |
| DM09142P4 | 0.27564827 | -1.2629932 | -1.3264605 | 1.0626278  |              |                |
| DM13903P2 | 0.27575588 | -1.5177474 | -1.2577943 | -1.3353937 |              |                |
| DM02616P4 | 0.27576768 | -1.0149304 | 1.0073934  | 1.1907974  |              |                |
| DM03951P2 | 0.27599242 | 1.0905546  | 1.1278343  | -1.0605183 |              |                |
| DM08306P1 | 0.2761087  | -1.0594425 | -1.1123617 | 1.1069739  |              |                |
| DM02937P2 | 0.2763038  | 1.0917196  | 1.0763141  | 1.1975642  |              |                |
| DM10659P3 | 0.27644342 | 1.3775837  | -1.7130153 | 1.8462783  |              |                |
| DM03304P2 | 0.27662542 | 1.0789196  | 1.1089233  | 1.1087432  |              |                |
| DM14818P1 | 0.27668154 | -1.0295403 | -1.1687616 | -1.3071944 |              |                |
| DM03502P2 | 0.27677268 | 1.0955154  | 1.0673337  | -1.0557345 |              |                |
| DM10670P2 | 0.27679354 | -1.0265751 | -1.0930015 | 1.1495388  |              |                |
| DM14927P2 | 0.27694818 | -1.0541284 | -1.1980683 | -1.344602  |              |                |
| DM07083P1 | 0.27699676 | 1.0116996  | -1.0203886 | 1.7286886  |              |                |
| DM04236P1 | 0.277045   | 1.2960114  | -1.2415973 | 1.0017804  |              |                |
| DM04284P3 | 0.277117   | 1.1728525  | 1.0848674  | 1.070332   | AAEL_AAEL0C  | XM_001653410.1 |
| DM10383P3 | 0.27714825 | -1.0930312 | 1.0661665  | -1.0501741 |              |                |
| DM07623P1 | 0.2772053  | -1.0942947 | -1.039046  | -1.1155895 |              |                |
| DM09024P2 | 0.27721488 | -1.1304564 | -1.0245655 | -1.1761302 |              |                |
| DM05538P2 | 0.27734712 | -1.0397485 | 1.0024235  | -1.0904951 | BRAFLDRAFT   | XM_002586200.1 |
| DM01940P1 | 0.27737156 | -1.2489257 | -1.017926  | -1.0049771 |              |                |
| DM10247P2 | 0.27765977 | -1.3348273 | 1.246795   | -1.2359923 |              |                |
| DM11263P3 | 0.2776848  | -1.2001736 | -1.2783524 | 1.0175138  |              |                |
| DM03792P3 | 0.27771026 | -1.2610104 | -1.1755749 | -1.2454158 |              |                |
| DM12685P1 | 0.27786446 | -1.15621   | -1.4731461 | -1.1652933 |              |                |
| DM00773P1 | 0.27791467 | -1.0098665 | 1.0901419  | -1.1237868 | LOC607910    | XM_844766.1    |
| DM12550P2 | 0.27795288 | -1.0938426 | -1.0175906 | -1.1941502 |              |                |
| DM10241P3 | 0.2779969  | 1.1411966  | 1.0955864  | 1.4578565  |              |                |
| DM05233P1 | 0.27810618 | 1.194593   | -1.6470535 | -1.0896347 |              |                |

|           |            |            |            |            |            |                |
|-----------|------------|------------|------------|------------|------------|----------------|
| DM02959P1 | 0.27813846 | 1.0011634  | 1.0929797  | 1.1582284  |            |                |
| DM04766P2 | 0.2782193  | -1.0496022 | 1.044936   | -1.2636414 |            |                |
| DM00700P1 | 0.27823475 | -1.109117  | -1.1471573 | -1.129604  |            |                |
| DM14394P2 | 0.27835077 | 1.0347747  | -1.2275909 | 1.3092445  |            |                |
| DM01422P1 | 0.2783903  | -1.090568  | 1.0224311  | -1.1661543 | DERE\GG240 | XM_001969147.1 |
| DM02176P1 | 0.2784015  | -1.0716928 | -1.280879  | -1.1645039 | IDH1       | XM_002403225.1 |
| DM10484P1 | 0.27871576 | 1.0265752  | 1.0539497  | 1.0212198  | BRAFLDRAFT | XM_002590712.1 |
| DM06904P2 | 0.27878296 | 1.0555084  | -1.8490467 | -1.0201049 |            |                |
| DM02082P1 | 0.27882838 | 1.1247389  | 1.2784778  | 1.074906   | BGM        | NM_079959.2    |
| DM07586P2 | 0.2788437  | 1.1555465  | -1.0115432 | 1.1800355  |            |                |
| DM04959P1 | 0.27891973 | -1.0541211 | -1.1443615 | -1.2213907 | LOC1002821 | NM_001155103.1 |
| DM12316P2 | 0.27904618 | -1.1512343 | -1.0678421 | -1.1473387 |            |                |
| DM07124P3 | 0.27909502 | 1.9379     | 1.1332864  | 2.4955807  |            |                |
| DM03585P3 | 0.2791545  | -1.2037809 | 1.0648624  | -1.0746682 | AN11G04870 | XM_001394441.1 |
| DM02088P1 | 0.27925247 | -1.0310391 | 1.6563377  | -1.0700179 | CPR111     | XM_308831.4    |
| DM02011P1 | 0.27934793 | -1.1050241 | -1.0046172 | 1.0721148  | RN18S1     | NR_003286.2    |
| DM12102P1 | 0.27937165 | -1.0547278 | 1.0612255  | -1.0522019 |            |                |
| DM15183P1 | 0.27944794 | 1.003884   | 1.1867286  | 1.402784   |            |                |
| DM00819P4 | 0.2794613  | 1.0617181  | 1.0819925  | -1.071337  | ACO1       | XM_785989.1    |
| DM02154P4 | 0.2796415  | -1.141592  | -1.0354761 | -1.1514499 | MED31      | XM_415924.2    |
| DM02115P2 | 0.27965587 | -1.1360201 | -1.039087  | 1.1263462  | CCT5       | NM_204009.1    |
| DM01208P3 | 0.27968502 | 1.148874   | -1.1589186 | 1.1675762  |            |                |
| DM05381P2 | 0.27981856 | -1.146674  | -1.0564088 | -1.1662687 |            |                |
| DM02876P3 | 0.27985144 | -1.0405245 | 1.2645413  | 1.26496    | LOC662475  | XM_968567.1    |
| DM07783P2 | 0.28008208 | -1.0173147 | -1.0184594 | 1.1692115  |            |                |
| DM12574P1 | 0.2801333  | -1.1195712 | 1.0202899  | -1.0375615 |            |                |
| DM11894P4 | 0.28015938 | 1.2103013  | 1.0839195  | -1.0044717 |            |                |
| DM05808P1 | 0.28019267 | 1.0071707  | 1.0141546  | 1.085773   | LOC1000168 | XM_001366553.1 |
| DM10175P3 | 0.2802922  | 1.2274827  | 1.4188968  | 1.2962687  |            |                |
| DM15031P1 | 0.2804898  | -1.1418787 | 1.0119123  | 1.0146978  |            |                |
| DM03230P3 | 0.28055522 | -1.2210847 | 1.1448842  | -1.0577661 | LOC411450  | XM_394925.3    |
| DM01132P3 | 0.28056404 | -1.1730719 | -1.0702335 | -1.0777826 | PNO1       | NM_001161970.1 |
| DM02901P2 | 0.28081313 | 1.2752168  | 1.797186   | 1.5697566  |            |                |
| DM14458P2 | 0.28107747 | 1.0966705  | 1.2203897  | 1.0316861  |            |                |
| DM06287P1 | 0.28154674 | -1.0881634 | 1.0136683  | 1.0539483  | TOM7       | NM_001162395.1 |
| DM01708P3 | 0.2815989  | -1.1451623 | 1.0026312  | 1.0534437  | DMOJ\GI105 | XM_002001045.1 |
| DM05239P3 | 0.28161433 | -1.1331927 | 1.0839523  | -1.0660615 |            |                |
| DM03045P4 | 0.28165048 | 1.0148523  | 1.0194458  | 1.138896   |            |                |
| DM08864P1 | 0.28176686 | -1.0385437 | -1.0730041 | -1.1477362 |            |                |
| DM06148P4 | 0.28182465 | 1.0085696  | -1.0717676 | 1.1053789  | ISCW_ISCWC | XM_002411321.1 |
| DM10405P3 | 0.2818897  | -1.0739051 | -1.5017345 | 1.1734608  |            |                |
| DM13126P3 | 0.28211606 | 1.1481868  | 1.2470754  | 1.2827383  |            |                |
| DM13153P1 | 0.28211963 | -1.2077831 | -1.2046013 | -1.5086248 |            |                |
| DM00623P3 | 0.28217915 | -1.0833812 | 1.0127804  | -1.1618805 | LOC662524  | XM_968615.1    |
| DM07141P1 | 0.28225788 | 1.3780006  | -1.615575  | 2.9909105  |            |                |
| DM05195P3 | 0.2823219  | 1.0723046  | -1.2794251 | 1.0244595  |            |                |
| DM11129P3 | 0.2825538  | 1.0790033  | 1.0494653  | -1.5337125 |            |                |
| DM12204P3 | 0.28264105 | 1.0457772  | -1.2330722 | 1.1324208  |            |                |
| DM06433P3 | 0.2826541  | 1.173739   | 1.1603173  | 1.2303889  |            |                |
| DM06913P1 | 0.28275272 | -1.429355  | -1.2849517 | -1.4880282 |            |                |

|           |            |            |            |            |              |                |
|-----------|------------|------------|------------|------------|--------------|----------------|
| DM03662P1 | 0.28275588 | 1.4377501  | 1.2087635  | -1.1327896 | LOC1000890   | XM_001518538.1 |
| DM00005P1 | 0.28281882 | 1.1600844  | -1.4264253 | 1.2915832  | DYAK\GE224   | XM_002095540.1 |
| DM06656P1 | 0.28283718 | -1.3466241 | -2.063924  | -2.2880847 |              |                |
| DM08076P1 | 0.28284118 | 1.7880834  | 1.7739757  | 2.0203469  |              |                |
| DM05325P1 | 0.28290844 | -1.064435  | -1.0541449 | 1.2778684  |              |                |
| DM08738P3 | 0.283205   | -1.4664043 | -1.5074219 | -1.5304767 |              |                |
| DM04592P2 | 0.2833655  | -1.076123  | 1.1063551  | -1.0623207 |              |                |
| DM04395P3 | 0.2833695  | 1.061001   | 1.0843394  | -1.1009353 | LOC1001597   | XM_001946887.1 |
| DM02863P4 | 0.28346157 | 1.0363095  | 1.2409247  | -1.0904835 | CPIPJ_CPIJ01 | XM_001857207.1 |
| DM03284P2 | 0.28353283 | -1.0781496 | 1.0198983  | -1.1042057 | NIT2         | NM_001034126.1 |
| DM01256P2 | 0.28357878 | -1.073733  | -1.0784063 | -1.2008823 | LOC659752    | XM_001812847.1 |
| DM10929P4 | 0.28372622 | -1.0803856 | -1.1930215 | -1.3420866 |              |                |
| DM02210P2 | 0.28377697 | 2.2133052  | 2.9666398  | 1.1295786  | CUTICLE PRO  | XM_001659414.1 |
| DM06384P3 | 0.28381938 | -1.1355054 | -1.2500347 | -1.1402926 | DYAK\GE176   | XM_002101502.1 |
| DM12948P1 | 0.28382584 | -1.307285  | -1.1564405 | -1.0247328 |              |                |
| DM02106P1 | 0.28388938 | -1.1626647 | -1.1585543 | -1.3042753 |              |                |
| DM10400P3 | 0.2839157  | -1.1097358 | 1.0797974  | -1.153848  |              |                |
| DM08633P1 | 0.28409433 | 1.0279655  | -1.141301  | -1.2640731 |              |                |
| DM05956P1 | 0.28423262 | 1.4258226  | 1.3803751  | 1.4801213  | LOC664385    | XM_970392.1    |
| DM14219P1 | 0.28434923 | -1.5209765 | -1.3415983 | -1.0730281 |              |                |
| DM13904P1 | 0.28435686 | -1.5398192 | -1.452982  | -1.0655454 |              |                |
| DM01929P2 | 0.28444627 | 1.0428509  | 1.1876427  | -1.0122322 |              |                |
| DM14025P4 | 0.28448516 | -1.1957074 | -1.0184919 | -1.0864193 |              |                |
| DM01692P1 | 0.2845197  | -1.1020298 | -1.175996  | -1.142078  | OPLAH        | NM_017570.3    |
| DM14236P4 | 0.2845197  | -1.2597353 | 1.1487097  | 1.1014485  |              |                |
| DM08721P1 | 0.28459895 | -1.0157996 | -1.0252539 | -1.154109  |              |                |
| DM05251P3 | 0.2846234  | -1.2186139 | -1.2827684 | -1.4862213 |              |                |
| DM07030P2 | 0.28465036 | 1.1863657  | 1.1278355  | 1.029756   | LOC726700    | XM_001122423.1 |
| DM00265P4 | 0.28465512 | -1.009948  | -1.0732492 | -1.1563864 | DGRI\GH110   | XM_001988266.1 |
| DM13071P1 | 0.28475454 | -1.0476341 | -1.0320038 | 1.193424   |              |                |
| DM10460P3 | 0.28490362 | -1.1052504 | -1.625305  | 1.1464458  |              |                |
| DM14475P1 | 0.2849114  | -1.328339  | -1.1843227 | -1.0771841 |              |                |
| DM00504P3 | 0.2850057  | -1.0058135 | -1.1454725 | -1.1541609 | POR          | NM_001085484.1 |
| DM01654P4 | 0.28501204 | -1.0540586 | 1.0853877  | -1.0140568 | ACYPI004223  | NM_001162090.1 |
| DM06715P2 | 0.28513205 | 1.1052126  | -1.0546978 | -1.0735213 |              |                |
| DM01352P4 | 0.2852202  | -1.6897045 | -1.3713527 | -1.257176  |              |                |
| DM01649P3 | 0.2852811  | 1.1438128  | 1.199825   | 1.2353067  | ECR          | NM_001159355.1 |
| DM12243P2 | 0.28540146 | 1.0264981  | -1.7200061 | 1.1365592  |              |                |
| DM05288P2 | 0.28545693 | -1.1617706 | -1.0454789 | 1.2285109  |              |                |
| DM03221P2 | 0.28549996 | -1.0092709 | -1.0585498 | -1.0555664 |              |                |
| DM14568P1 | 0.2855232  | -1.1269964 | -1.2120843 | -1.0311882 |              |                |
| DM02390P3 | 0.28571674 | 1.209819   | 1.6642536  | 1.1163534  |              |                |
| DM08914P2 | 0.28577095 | 1.1441312  | 1.1285101  | -1.1847848 |              |                |
| DM14866P1 | 0.28578928 | 1.0723612  | -1.135329  | -1.2576749 |              |                |
| DM07056P3 | 0.28582585 | -1.2057401 | 1.0117135  | -1.3487796 |              |                |
| DM14413P2 | 0.28588194 | 1.062049   | 1.0169038  | -1.1141064 |              |                |
| DM02746P3 | 0.28600192 | 1.2236463  | 1.5691026  | 1.9190304  |              |                |
| DM07498P1 | 0.28606918 | -1.0737823 | -1.2717146 | -1.2280388 |              |                |
| DM11141P1 | 0.28611243 | -1.0053449 | 1.2955962  | 1.046594   |              |                |
| DM04882P1 | 0.2862526  | -1.0608714 | 1.5448405  | 1.3139006  |              |                |

|           |            |            |            |            |              |                |
|-----------|------------|------------|------------|------------|--------------|----------------|
| DM06714P3 | 0.28631714 | 1.0819141  | -1.055814  | 1.2681925  |              |                |
| DM10864P1 | 0.28647274 | 1.0396379  | 1.0814413  | -1.075953  |              |                |
| DM03935P1 | 0.2864878  | -1.076824  | -1.0600314 | -1.1163507 |              |                |
| DM06593P2 | 0.2864966  | -1.0432209 | -1.0294994 | 1.2019247  | LOC656985    | XM_963478.1    |
| DM08672P1 | 0.2865399  | -1.0615863 | -1.0299214 | -1.1829557 |              |                |
| DM06815P2 | 0.2865502  | 1.436346   | 2.2796884  | 1.0122366  |              |                |
| DM08796P3 | 0.28666314 | -1.7418319 | -1.7917601 | 1.2491518  |              |                |
| DM06824P3 | 0.28671515 | -1.146818  | -1.0904785 | -1.1205707 |              |                |
| DM06310P1 | 0.2867563  | 1.1299982  | -1.1517845 | -1.2261956 |              |                |
| DM00417P1 | 0.28681064 | -1.0337026 | -1.0188285 | -1.1465732 | LOC692971    | NM_001046810.1 |
| DM06737P3 | 0.2868277  | 1.7521821  | 2.1660655  | 1.3230969  |              |                |
| DM00685P2 | 0.2868741  | -1.0289342 | -1.1694751 | 1.11652    |              |                |
| DM08587P2 | 0.28697369 | 1.0164422  | 1.0692148  | -1.1468678 |              |                |
| DM00470P2 | 0.28700978 | 1.2869266  | -1.0628345 | 1.0331722  | DGRIV\GH235\ | XM_001994208.1 |
| DM03009P1 | 0.28706792 | 1.125262   | -1.9505885 | -1.1051962 | DPSE\GA216\  | XM_001358387.2 |
| DM01126P1 | 0.2871037  | 1.1829768  | 1.1453494  | 1.1738775  | GHITM        | NM_001031217.1 |
| DM05763P1 | 0.287133   | 1.1869558  | -1.4013567 | -1.0406635 |              |                |
| DM01987P1 | 0.28737992 | -1.2571924 | -1.1232555 | -1.0431358 | AAEL_AAELOC  | XM_001658256.1 |
| DM02637P1 | 0.2874239  | -1.0953785 | -1.0409971 | -1.1088296 | AAEL_AAELOC  | XM_001654119.1 |
| DM01519P2 | 0.287521   | 1.1537468  | -1.0796052 | -1.1996545 | DGRIV\GH105\ | XM_001988471.1 |
| DM11336P1 | 0.2875339  | -1.352218  | -1.3686854 | -1.4850006 |              |                |
| DM03699P3 | 0.28760013 | 1.1537592  | 1.1172233  | -1.2351699 | DPP          | XM_001547900.1 |
| DM03071P2 | 0.28763688 | -1.0053862 | -1.0192491 | -1.136393  | LOC409841    | XM_393332.3    |
| DM09032P2 | 0.28787175 | -1.158843  | -1.0037571 | -1.0187268 |              |                |
| DM09169P2 | 0.28804687 | 1.2225236  | 1.382657   | 1.3273442  |              |                |
| DM09149P2 | 0.2881008  | -1.2025506 | -1.4452841 | 1.1148378  |              |                |
| DM07905P1 | 0.28817874 | -1.1092256 | -1.0546412 | 1.1177511  |              |                |
| DM09639P1 | 0.28843156 | -1.1533586 | -1.021947  | 1.012891   |              |                |
| DM01044P1 | 0.2885276  | -1.0783966 | 1.07214    | -1.1245054 | LOC1000263\  | XM_001376959.1 |
| DM10385P1 | 0.2885391  | 1.3922578  | -1.2443978 | -1.1590027 |              |                |
| DM08150P1 | 0.28854465 | -1.3667377 | 1.0472479  | 1.2916584  |              |                |
| DM08485P1 | 0.28856838 | -1.0719789 | -1.0177356 | 1.038592   |              |                |
| DM10161P1 | 0.28862804 | 1.1881665  | 1.1732032  | 1.255733   |              |                |
| DM13837P2 | 0.28874817 | -1.1517625 | -1.2316442 | 1.0347675  |              |                |
| DM15352P3 | 0.28883323 | 1.067459   | 1.2094916  | 1.1637461  |              |                |
| DM05621P1 | 0.28888524 | -1.0492759 | -2.116187  | -1.1013892 |              |                |
| DM01628P1 | 0.2890553  | -1.1040664 | -1.1167293 | -1.0919731 | DPER\GL184\  | XM_002027549.1 |
| DM08271P1 | 0.28908604 | -1.0243063 | -1.1213584 | 1.2193846  |              |                |
| DM09592P2 | 0.28914216 | 1.0761622  | 1.0154053  | -1.2204297 |              |                |
| DM08346P2 | 0.28922236 | 1.0576614  | 1.2020824  | 1.1062888  |              |                |
| DM08978P1 | 0.28931117 | -1.1234092 | 1.0291543  | 1.1503699  |              |                |
| DM01533P1 | 0.28942683 | -1.017067  | 1.0352979  | -1.1192731 |              |                |
| DM10491P3 | 0.28945005 | -1.0816414 | -1.163238  | 1.0878112  |              |                |
| DM14194P3 | 0.28953496 | 1.0043776  | -1.2946054 | -1.2453365 |              |                |
| DM07427P3 | 0.28955188 | -1.0075873 | 1.2970829  | -1.1710321 |              |                |
| DM02122P3 | 0.2895754  | 1.1463145  | 1.0154253  | -1.0571986 | LOC664577    | XM_970573.1    |
| DM12497P1 | 0.2897275  | 1.0088646  | -1.1285604 | -1.1682498 |              |                |
| DM09734P1 | 0.28983247 | -1.4051851 | -1.1164502 | -1.6356292 |              |                |
| DM07440P1 | 0.28983614 | 1.1509596  | -1.1441431 | 1.2133262  |              |                |
| DM01078P3 | 0.289869   | -1.0405208 | -1.2871889 | -1.3655882 | LOC408441    | XM_391988.3    |

|           |            |            |            |            |            |                |
|-----------|------------|------------|------------|------------|------------|----------------|
| DM09611P3 | 0.28987733 | 1.025147   | 1.2506565  | 1.1676637  |            |                |
| DM05069P1 | 0.2899105  | -1.1090245 | 1.0023488  | -1.1713704 | LOC1000775 | XM_001514725.1 |
| DM04307P1 | 0.29005235 | 1.150531   | 1.1818526  | 1.2166443  |            |                |
| DM15231P1 | 0.29011533 | 1.2054592  | 1.2390608  | -1.2726681 |            |                |
| DM14600P1 | 0.29016912 | -1.2032024 | -1.1024307 | -1.0151021 |            |                |
| DM02340P4 | 0.29024646 | -1.0677494 | 1.2315656  | 1.462146   | LOC576591  | XR_026519.1    |
| DM06882P2 | 0.29029045 | 1.1579049  | 1.122089   | 1.0847452  |            |                |
| DM04458P2 | 0.29035318 | -1.22837   | -1.1528623 | 1.0188406  |            |                |
| DM01555P3 | 0.29037294 | -1.5688502 | -1.4067019 | -1.3562986 |            |                |
| DM05046P1 | 0.29044312 | 1.0853244  | -1.8318049 | 1.0833695  |            |                |
| DM10033P4 | 0.2904541  | -1.0042096 | 1.1481135  | -1.0573313 |            |                |
| DM03671P2 | 0.29046053 | -1.0816106 | 1.0677022  | 1.0898128  |            |                |
| DM09366P3 | 0.29047883 | 1.0028372  | -1.0152042 | -1.1889105 |            |                |
| DM10035P1 | 0.29065046 | 1.0861163  | 1.1627918  | 1.1135011  |            |                |
| DM07346P1 | 0.2907791  | 1.0466857  | -1.850595  | 1.3550193  |            |                |
| DM00385P2 | 0.29083902 | -1.1393526 | -1.2038349 | -1.2099339 | DERE\GG141 | XM_001971887.1 |
| DM12742P1 | 0.29103673 | 1.0750849  | -1.0632907 | 1.2160572  |            |                |
| DM00767P1 | 0.29105592 | -1.149426  | -1.1171256 | -1.1609176 | DPSE\GA188 | XM_001356369.2 |
| DM06304P2 | 0.29115012 | -1.116043  | -1.1830064 | 1.0818613  |            |                |
| DM08201P2 | 0.29119423 | -1.0713662 | 1.0356206  | 1.1085209  |            |                |
| DM15301P1 | 0.2912992  | -1.2181875 | -1.1634684 | -1.2170193 |            |                |
| DM02091P1 | 0.29132733 | 1.03334    | 1.0288367  | 1.0848179  | LOC727141  | XM_001122854.1 |
| DM02903P1 | 0.29156712 | -1.130539  | -1.0528226 | 1.2502776  | LOC692952  | NM_001046792.1 |
| DM01756P2 | 0.2916148  | -1.1665763 | -1.1471928 | 1.0602652  | GM9811     | NM_025974.2    |
| DM12890P4 | 0.29195207 | 1.0766865  | 1.1296653  | -1.204689  | LOC1001779 | XM_002131270.1 |
| DM09475P3 | 0.29198337 | 1.0769509  | 1.045345   | 1.1951336  |            |                |
| DM12025P2 | 0.29215404 | -1.2461295 | -1.8349806 | -1.2636048 |            |                |
| DM07280P1 | 0.2921946  | -1.3009658 | -1.2739799 | -1.2841587 |            |                |
| DM11755P3 | 0.2922021  | 1.0330716  | -1.0201973 | 1.0256821  |            |                |
| DM08233P1 | 0.29225382 | -1.1163199 | 1.0098305  | -1.2684584 |            |                |
| DM06588P1 | 0.29234347 | 1.0784442  | 1.5302327  | 1.0811952  |            |                |
| DM04365P3 | 0.29242077 | 1.0351849  | 1.131497   | 1.0051862  |            |                |
| DM12696P1 | 0.29244623 | 1.1040785  | -1.2442347 | 1.1359617  |            |                |
| DM02143P2 | 0.2925409  | -1.0971352 | -1.1147934 | -1.1234072 | DYAK\GE156 | XM_002101453.1 |
| DM02163P3 | 0.29263857 | 1.1010044  | 1.0489566  | -1.1353376 |            |                |
| DM03697P3 | 0.29266372 | 1.3281724  | 1.620159   | 1.2960979  | DGRI\GH171 | XM_001985632.1 |
| DM05851P3 | 0.29266462 | 1.111469   | -1.0209498 | -1.1194333 | AGAP_AGAP0 | XM_308279.4    |
| DM12196P2 | 0.29270154 | -1.1068054 | -1.1108623 | 1.0234803  |            |                |
| DM14312P1 | 0.29277098 | 1.0220381  | 1.1130415  | -1.108484  |            |                |
| DM06049P2 | 0.29281455 | 1.3466564  | 1.1182113  | 1.0736737  |            |                |
| DM13381P2 | 0.29282457 | 1.2377785  | 1.0855011  | 1.2222047  |            |                |
| DM03165P1 | 0.29282722 | -1.0163068 | -1.2194456 | 1.101465   | SPZ6       | XM_001944011.1 |
| DM01638P2 | 0.29287666 | 1.0221947  | -1.1019949 | -1.152462  | DWIL\GK184 | XM_002074300.1 |
| DM10506P2 | 0.29288107 | 1.300765   | -2.1937666 | 1.1290733  |            |                |
| DM07848P1 | 0.29294232 | -1.2321954 | -1.6541195 | -1.2088228 |            |                |
| DM00429P1 | 0.29309648 | 1.0087674  | -1.000533  | 1.0197744  | SLC41A2    | NM_001103206.1 |
| DM11034P2 | 0.2932812  | -1.0480676 | -1.0785433 | 1.0699825  |            |                |
| DM01131P1 | 0.29331538 | -1.161816  | -1.1760527 | -1.1090158 |            |                |
| DM03525P3 | 0.2936857  | -1.0324138 | -1.1355013 | -1.0207086 | NPR        | XM_001650662.1 |
| DM11132P3 | 0.29369265 | -1.3472996 | 1.0950054  | -1.0130355 |            |                |

|           |            |            |            |            |             |                |
|-----------|------------|------------|------------|------------|-------------|----------------|
| DM05433P2 | 0.29371342 | -1.1078632 | -1.1324924 | -1.1525644 |             |                |
| DM13988P3 | 0.29375458 | -1.3876611 | -1.5868852 | -1.2157165 |             |                |
| DM00957P1 | 0.29378822 | -1.0122623 | -1.0030816 | -1.1037171 | LOC1001869: | XR_052904.1    |
| DM08199P1 | 0.29383868 | 1.1473542  | 1.2533408  | 1.1192297  |             |                |
| DM05786P1 | 0.29385063 | 1.118588   | -1.3967294 | 1.0431608  |             |                |
| DM06478P2 | 0.29390347 | 1.0282255  | -1.0600172 | 1.1234767  |             |                |
| DM08143P1 | 0.2940862  | 1.0022539  | 1.0560627  | 1.1051347  |             |                |
| DM02256P3 | 0.29413405 | 1.0124364  | -1.0830697 | 1.0819973  | LOC552638   | XM_625013.2    |
| DM10087P3 | 0.2941522  | -1.124258  | 1.2511942  | -1.387424  |             |                |
| DM12136P1 | 0.29436725 | -1.1034179 | 1.0212752  | -1.1147753 |             |                |
| DM04958P3 | 0.29438323 | -1.335557  | -1.0308645 | 1.0915511  | LOC1000280  | XM_001378156.1 |
| DM09968P3 | 0.2944546  | 1.0697204  | -1.0301869 | -1.3001245 |             |                |
| DM09795P1 | 0.29449287 | 1.0837126  | 1.2251036  | 1.0725532  |             |                |
| DM07835P1 | 0.29449746 | 1.4152561  | 1.1657434  | -1.0826118 |             |                |
| DM00808P3 | 0.29458925 | 1.1230819  | 1.1639138  | 1.1566542  | GHITM       | NM_001031217.1 |
| DM09043P1 | 0.2946373  | -1.0673862 | 1.1191115  | -1.0586288 |             |                |
| DM06635P1 | 0.29468268 | 1.0300816  | -1.011039  | -1.1559138 |             |                |
| DM06392P3 | 0.29477525 | 1.1434742  | -1.0024825 | 1.2632785  |             |                |
| DM11864P3 | 0.29478133 | -1.0428705 | 1.1109737  | 1.070105   |             |                |
| DM00420P3 | 0.29485056 | 1.0098836  | 1.1380591  | 1.1374207  | DANA\GF223  | XM_001965517.1 |
| DM07625P1 | 0.2948566  | -1.0204245 | 1.1467199  | -1.032704  | DGRI\GH248  | XM_001992545.1 |
| DM03487P3 | 0.29496774 | -1.0156224 | -1.2892467 | 1.5603484  | CYP4F8      | NM_007253.3    |
| DM01978P1 | 0.29503447 | -1.0189488 | 1.0684853  | 1.1011344  | PSMC1       | NM_008947.3    |
| DM11217P1 | 0.29512462 | -1.0107714 | -1.0940628 | -1.2838775 |             |                |
| DM09662P3 | 0.2951615  | 1.323983   | 1.2346524  | 1.3859721  |             |                |
| DM01490P3 | 0.2951662  | 1.0470092  | 1.1358438  | -1.1205624 | GM14147     | NM_001097977.1 |
| DM00600P3 | 0.29527786 | 1.4647028  | 1.7656444  | 1.4500843  | CYP         | XM_001655916.1 |
| DM03437P1 | 0.29529133 | 1.1177949  | -1.1119862 | 1.2783134  |             |                |
| DM02598P1 | 0.29552597 | 1.0926975  | -1.0536888 | 1.0709133  | DMOJ\GI127  | XM_002007107.1 |
| DM06316P3 | 0.295582   | -1.0024751 | 1.273091   | 1.3334963  | FG02099.1   | XM_382275.1    |
| DM03918P3 | 0.2955974  | -1.107005  | -1.0636849 | -1.0750486 |             |                |
| DM04838P2 | 0.29570815 | -1.1142589 | -1.1651132 | -1.04737   | VHA16       | NM_001162059.1 |
| DM08945P3 | 0.29571408 | -1.1870261 | -1.2789848 | 1.1609062  |             |                |
| DM09757P1 | 0.29575485 | 1.2909337  | 1.3414365  | 1.1216189  |             |                |
| DM01620P3 | 0.2957621  | -1.3409771 | -1.045071  | -1.0483099 |             |                |
| DM03076P3 | 0.2958152  | 1.0188452  | 1.1003677  | 1.1078622  |             |                |
| DM02376P2 | 0.295965   | -1.1413677 | -1.3362907 | -1.1807841 |             |                |
| DM01383P1 | 0.29600593 | 1.1645887  | -1.0947179 | -1.0665885 |             |                |
| DM10684P3 | 0.29603797 | 1.050997   | 1.0134611  | -1.0813115 |             |                |
| DM01503P3 | 0.2961067  | -1.0087223 | 1.0815064  | -1.2421588 | FARSB       | XM_858952.1    |
| DM01861P1 | 0.29613608 | 1.0120392  | 1.0612148  | 1.0547949  | DVIR\GJ1569 | XM_002058022.1 |
| DM04461P1 | 0.29617095 | -1.0456867 | -1.1366352 | 1.1180116  |             |                |
| DM13727P4 | 0.2961962  | 1.1703916  | 1.7721763  | -1.2556484 |             |                |
| DM05615P4 | 0.2961996  | -1.3580228 | 1.2771909  | -1.1212393 |             |                |
| DM06583P1 | 0.2963194  | -1.2689521 | -1.034048  | -1.0399936 |             |                |
| DM05554P2 | 0.29642424 | -1.0209042 | -1.0203581 | -1.2709484 |             |                |
| DM00571P1 | 0.29643032 | -1.0337609 | 1.0577246  | 1.06118    | DANA\GF144  | XM_001962384.1 |
| DM02636P2 | 0.29654738 | 1.0098344  | 1.0518761  | 1.0377356  | RN28S1      | NR_003287.2    |
| DM09135P4 | 0.29656535 | -1.0260577 | -1.5701454 | -1.0201223 |             |                |
| DM05495P2 | 0.29660058 | 1.0951053  | -1.1079775 | 1.0902401  |             |                |

|           |            |            |            |            |                           |
|-----------|------------|------------|------------|------------|---------------------------|
| DM11469P1 | 0.29666477 | -1.0297626 | -1.0311893 | 1.075588   |                           |
| DM01675P1 | 0.29670638 | -1.0194572 | 1.0236403  | 1.016273   | TRIADDRAFT_XM_002108542.1 |
| DM08184P1 | 0.29672897 | 1.0010185  | -1.2194875 | 1.057438   |                           |
| DM00950P3 | 0.29682752 | -1.0150002 | -1.2263124 | -1.1949753 | DMOJ\GI139\XM_002009184.1 |
| DM01184P3 | 0.29688832 | -1.0468943 | 1.0154519  | -1.1211762 | C9ORF64 NM_032307.3       |
| DM06606P1 | 0.29690245 | 1.0506961  | -1.3935499 | 1.1725272  |                           |
| DM04543P1 | 0.29702172 | -1.1263398 | 1.0771718  | 1.113164   | COPS3 NM_199685.1         |
| DM05056P1 | 0.2970335  | 1.0348383  | 1.0870863  | -1.1264712 |                           |
| DM12893P3 | 0.29709566 | -1.0511142 | -1.2495108 | 1.1672053  |                           |
| DM14489P1 | 0.2971022  | -1.3736554 | -1.2216362 | 1.1825795  |                           |
| DM13719P1 | 0.29714563 | 1.2129238  | 1.4723855  | 1.3883595  |                           |
| DM14767P2 | 0.29731306 | -1.0027093 | 1.2054946  | 1.1134076  |                           |
| DM02962P3 | 0.29741594 | -1.1796123 | 1.1491457  | 1.3757657  | LOC1002248(XM_002190562.1 |
| DM09555P1 | 0.29747534 | 1.0663766  | 1.2246077  | -1.0774704 |                           |
| DM14618P1 | 0.29748756 | 1.0203401  | -1.0710751 | -1.172169  |                           |
| DM02441P3 | 0.297498   | -1.1773223 | -1.0962707 | -1.0833274 | ISCW_ISCWC XM_002402537.1 |
| DM04522P1 | 0.29757276 | -1.036754  | -1.3265132 | 1.0831207  |                           |
| DM00358P2 | 0.29762593 | 1.1624973  | 1.0394052  | 1.2512922  | AGO XM_396532.3           |
| DM07028P2 | 0.2977089  | -3.6915598 | -1.1146554 | -1.1337243 |                           |
| DM06982P2 | 0.29774466 | 1.0554231  | -2.573185  | 1.3150138  |                           |
| DM04784P1 | 0.29782858 | 1.3675623  | 1.1981249  | 1.3494741  |                           |
| DM08595P3 | 0.29787388 | -1.0884814 | 1.2744823  | 3.5887778  |                           |
| DM01795P1 | 0.29788923 | 1.1801522  | -1.0495819 | 1.6743984  |                           |
| DM13419P1 | 0.297931   | 1.0402565  | -1.2242029 | -1.0548238 |                           |
| DM05202P3 | 0.29793665 | 1.0680153  | -1.0912284 | -1.0826852 |                           |
| DM14875P2 | 0.2979645  | -1.1125648 | -1.1131781 | 1.132389   | LOC1001207 XM_001604325.1 |
| DM03648P4 | 0.2980634  | -1.0298653 | 1.1074344  | 1.1145844  |                           |
| DM00122P1 | 0.29819614 | -1.1056967 | 1.0363867  | -1.027987  |                           |
| DM02728P2 | 0.29839936 | 1.0061203  | -1.0835925 | -1.165402  | KPNA3 XM_001156632.1      |
| DM14757P3 | 0.2984737  | 1.2164897  | 1.1805896  | 1.1338638  |                           |
| DM02292P2 | 0.2985267  | -1.0873239 | -1.1871096 | -1.0644099 | LOC1000303(XM_001379856.1 |
| DM10212P1 | 0.29855597 | -1.1542138 | 1.0414186  | 1.159454   |                           |
| DM00538P3 | 0.2986281  | -1.0325234 | -1.0977894 | -1.4033421 | LOC1002262:XM_002195375.1 |
| DM08195P1 | 0.29870096 | 1.0376265  | 1.1012939  | 1.5148324  |                           |
| DM02356P3 | 0.29872084 | -1.143765  | -1.0815393 | -1.2357892 |                           |
| DM12479P1 | 0.2987906  | 1.4952304  | 1.2376022  | 1.1491418  |                           |
| DM02071P1 | 0.2989149  | 1.4479408  | 1.5079658  | -1.1893843 | LOC1001655:XM_001950795.1 |
| DM08269P1 | 0.29892522 | 1.0169588  | 1.0740596  | -1.1094904 |                           |
| DM08871P3 | 0.2989381  | -1.2126064 | -1.1264195 | -1.1451659 |                           |
| DM11839P2 | 0.2991523  | 1.020116   | -1.0052733 | -1.0623426 |                           |
| DM11523P3 | 0.29918373 | -1.2241781 | -1.040069  | -1.7290784 |                           |
| DM02655P2 | 0.2992033  | -1.2276618 | 1.166297   | 1.0739533  | LOC711989 XM_001109809.1  |
| DM10097P1 | 0.2992211  | -1.097774  | -1.2055664 | -1.2177824 |                           |
| DM12371P2 | 0.29931983 | 1.0472682  | -1.2085627 | -1.1338431 |                           |
| DM13211P1 | 0.29937443 | -1.1860211 | 1.0000268  | 1.0330315  |                           |
| DM13957P2 | 0.29953292 | -1.2104031 | 1.1047931  | 1.1226329  |                           |
| DM07203P1 | 0.2995648  | 1.0597624  | 1.1669214  | 1.0286986  | ISCW_ISCWC XM_002401778.1 |
| DM02103P3 | 0.29962048 | -1.1903195 | -1.2693262 | -1.1338308 | DMOJ\GI239\XM_001998401.1 |
| DM13352P4 | 0.29966137 | 1.2462144  | -1.2994932 | 1.462816   |                           |
| DM02718P2 | 0.29970312 | 1.0808016  | 1.0230259  | 1.0796381  | COL2A1 NM_203889.1        |

|           |            |            |            |            |             |                |
|-----------|------------|------------|------------|------------|-------------|----------------|
| DM03741P3 | 0.29971316 | -1.0209283 | 1.0423782  | -1.1567103 | LOC1000897  | XM_001519025.1 |
| DM09802P2 | 0.29981172 | -1.0228357 | 1.2435316  | 1.0808698  |             |                |
| DM01835P2 | 0.29993185 | 1.1394842  | 1.0960425  | 1.2328396  | DVIR\GJ1752 | XM_002052351.1 |
| DM11027P2 | 0.29996827 | 1.0768331  | -1.1444468 | 1.1463394  |             |                |
| DM14229P1 | 0.3000138  | -1.1160715 | -1.0273818 | 1.1316833  |             |                |
| DM07728P1 | 0.30002114 | 1.0960722  | 1.4716021  | -1.0192287 |             |                |
| DM06137P1 | 0.30007392 | 1.0492867  | -1.0256841 | -1.1572723 | DPER\GL2109 | XM_002023148.1 |
| DM02868P1 | 0.3000814  | 1.0328501  | 1.186808   | 1.1481643  |             |                |
| DM12902P2 | 0.30010659 | 1.029684   | -1.0047141 | 1.0399171  |             |                |
| DM02777P1 | 0.3001847  | 1.0000099  | -1.1024438 | -1.0711387 | LOC677611   | NM_007788.3    |
| DM13016P1 | 0.3002817  | 1.3992941  | -1.05672   | -1.2126312 |             |                |
| DM11066P1 | 0.30034047 | -1.036627  | 1.0178944  | -1.160547  |             |                |
| DM00671P1 | 0.30038053 | -1.1105856 | -1.1910288 | -1.0237848 | IDH1        | XM_001365455.1 |
| DM01707P1 | 0.3004335  | 1.0162823  | -1.127958  | -1.1994311 | ACAA2       | NM_213052.1    |
| DM06568P3 | 0.30067387 | -1.1646706 | -1.1150718 | 1.0658617  |             |                |
| DM06334P1 | 0.3008569  | -1.0130081 | 1.2799246  | 1.3789841  |             |                |
| DM10186P2 | 0.3009608  | 1.172154   | -1.0096768 | -1.1592968 |             |                |
| DM08121P2 | 0.3009692  | -1.0213876 | 1.0655195  | -1.0866783 |             |                |
| DM11318P1 | 0.30102885 | -1.1707443 | 1.0712148  | -1.1239372 |             |                |
| DM07288P2 | 0.30107152 | -1.0574555 | 1.0174861  | 1.2234097  |             |                |
| DM05181P3 | 0.3010983  | -1.0544472 | 1.0766342  | -1.0487809 |             |                |
| DM08159P3 | 0.30117282 | 1.2549938  | 2.3843024  | 1.3112437  |             |                |
| DM09181P1 | 0.30127668 | -1.1624302 | -1.0898536 | -1.1401954 |             |                |
| DM03900P3 | 0.3012872  | 1.016025   | 1.0665755  | -1.1949548 |             |                |
| DM13867P3 | 0.30129004 | -1.1795459 | -1.0991883 | 1.2210591  | DSEC\GM138  | XM_002035500.1 |
| DM05976P1 | 0.30135456 | 1.350127   | 1.3290542  | -1.1069462 | GPX3        | NM_001163232.1 |
| DM12470P1 | 0.30143034 | 1.1958268  | 1.1775339  | 1.3987975  |             |                |
| DM14509P3 | 0.30147576 | -1.1048182 | -1.1113337 | 1.0497036  |             |                |
| DM05830P2 | 0.301614   | -1.0136135 | -1.1392794 | -1.1257259 | LOC1000290  | XM_001378882.1 |
| DM13659P1 | 0.30176702 | -1.0834324 | 1.0578262  | -1.1537318 |             |                |
| DM08882P1 | 0.30195203 | 1.1061556  | 1.1991688  | 1.0422078  |             |                |
| DM09153P2 | 0.30202267 | -1.0645257 | 1.0908577  | 1.1816441  |             |                |
| DM04793P1 | 0.30217373 | -1.3699821 | -1.3605801 | -1.5032932 |             |                |
| DM00838P3 | 0.30221805 | 1.704361   | 1.6390725  | 1.3020318  | BRAFLDRAFT  | XM_002611791.1 |
| DM15055P1 | 0.30241033 | -1.1048846 | -1.0037668 | 1.1915634  | LOC657776   | XM_970882.2    |
| DM00120P2 | 0.3025171  | -1.5835352 | -1.5340145 | -1.4741447 |             |                |
| DM13472P2 | 0.3025652  | 1.2027494  | 1.281985   | 1.121385   |             |                |
| DM12217P1 | 0.30261028 | -1.1393265 | -1.196042  | -1.0466089 |             |                |
| DM12469P1 | 0.302613   | -1.0813259 | 1.0411547  | 1.0709459  |             |                |
| DM15298P3 | 0.3027163  | 1.212161   | -1.0276854 | 1.1079115  | DSEC\GM235  | XM_002032388.1 |
| DM10799P4 | 0.30272642 | -1.0080118 | -1.0463011 | -1.1171525 |             |                |
| DM13811P1 | 0.3028441  | -1.095031  | 1.0970234  | 1.0840124  |             |                |
| DM08034P3 | 0.30285558 | -1.514439  | 1.0727302  | -1.9436356 |             |                |
| DM05796P3 | 0.3029528  | 1.0116899  | 1.1477534  | 1.0004332  |             |                |
| DM10263P4 | 0.30301633 | -1.1103221 | -1.2584745 | 1.1685982  |             |                |
| DM12221P3 | 0.30306405 | 1.0252763  | 1.0241569  | -1.1088082 |             |                |
| DM07935P3 | 0.3030701  | -1.0794877 | 1.0239019  | -1.1236656 |             |                |
| DM06120P1 | 0.30308655 | -1.1458387 | -1.1084068 | -1.1749048 |             |                |
| DM01855P2 | 0.30311266 | -1.0313745 | -1.1228312 | -1.2137697 | COPA        | XM_536131.2    |
| DM08539P1 | 0.30312854 | -1.1607248 | 1.1044906  | -1.2242477 |             |                |



|           |            |            |            |            |             |                |
|-----------|------------|------------|------------|------------|-------------|----------------|
| DM00626P4 | 0.30313653 | -1.1463038 | -1.1457164 | -1.2313652 | ACYPI001769 | NM_001162618.1 |
| DM07875P4 | 0.30319452 | -1.0912101 | -1.1363691 | -1.1126341 |             |                |
| DM07871P1 | 0.30339333 | 1.1722102  | 1.2572854  | 1.3318858  |             |                |
| DM01284P1 | 0.30343458 | 1.0054338  | 1.0568461  | -1.1071333 |             |                |
| DM07712P2 | 0.30354282 | -1.1809772 | 1.1259112  | 1.1017414  |             |                |
| DM03937P4 | 0.3035868  | -1.055878  | 1.1270268  | 1.3458394  |             |                |
| DM07469P1 | 0.3036343  | -1.1071001 | -1.2058529 | 1.0682322  |             |                |
| DM02684P1 | 0.3037412  | 1.1584188  | -1.0137194 | 1.0041972  | BRAFLDRAFT  | XM_002599296.1 |
| DM08915P1 | 0.30399427 | -1.1442848 | -1.1122651 | -1.293822  |             |                |
| DM15170P4 | 0.30417335 | 1.2075548  | 1.1305164  | -1.0938658 |             |                |
| DM09507P2 | 0.30419105 | -1.1182952 | -1.1982703 | -1.1533009 |             |                |
| DM05113P3 | 0.30430523 | -1.1231637 | -1.1714087 | -1.3672893 |             |                |
| DM12356P2 | 0.30433506 | 1.0066719  | 1.0138324  | -1.2179306 |             |                |
| DM14265P1 | 0.30442065 | -1.1087544 | -1.1237527 | 1.0713323  |             |                |
| DM10474P2 | 0.30450732 | -1.0462458 | -1.4137135 | 1.0574597  |             |                |
| DM00372P1 | 0.3046284  | 1.0634379  | -1.0366449 | -1.0523626 | LOC1001684  | XR_045754.1    |
| DM10499P3 | 0.30467355 | -1.0215431 | -1.0753073 | 1.0987463  |             |                |
| DM11140P4 | 0.30476317 | 1.0759805  | 1.0370356  | 1.3256806  |             |                |
| DM15303P3 | 0.30486128 | -1.0179337 | -1.2178271 | -1.679028  |             |                |
| DM03261P1 | 0.30501598 | 1.0352559  | 1.033339   | -1.0947928 | LOC552533   | XM_624909.2    |
| DM05935P3 | 0.30503705 | -1.3079869 | -1.1635034 | 1.1407757  | DERE\GG153  | XM_001972049.1 |
| DM02673P2 | 0.30510867 | -1.1131423 | -1.176279  | -1.1828988 | PK          | XM_001662663.1 |
| DM04805P4 | 0.30524573 | -1.0365801 | -1.0081547 | -1.2016815 |             |                |
| DM13926P3 | 0.30538175 | -1.0143745 | -1.345793  | -1.0492681 |             |                |
| DM10259P1 | 0.3055593  | -1.0185927 | -1.0878265 | -1.1483669 |             |                |
| DM00271P2 | 0.30560914 | 1.0799943  | 1.1185467  | -1.0381305 | LOC1000119  | XM_001363635.1 |
| DM03236P1 | 0.3056313  | -1.0872967 | -1.030387  | -1.201777  | LOC1001764  | XM_002130932.1 |
| DM13857P4 | 0.30565593 | -1.0101645 | 1.0015073  | 1.1834375  |             |                |
| DM05715P4 | 0.305705   | 1.0843083  | -1.1422075 | -1.0119658 |             |                |
| DM00592P3 | 0.30574375 | -1.0895951 | 1.0908313  | 1.199841   | DPSE\GA270  | XM_002137070.1 |
| DM10610P1 | 0.30579102 | -1.2907726 | -1.665047  | 1.2143968  |             |                |
| DM05049P1 | 0.305805   | -1.3491956 | 1.1201389  | -1.2649393 |             |                |
| DM03569P2 | 0.30581033 | 1.3430977  | 1.2519838  | 1.2867999  | SULF2       | XM_001503514.2 |
| DM09197P1 | 0.3058307  | -1.0431553 | 1.0648128  | -1.1353283 |             |                |
| DM11796P3 | 0.30586565 | -1.0229319 | 1.0865762  | 1.4145237  |             |                |
| DM01280P3 | 0.3059721  | -1.0407102 | -1.0326184 | -1.2175169 |             |                |
| DM11394P1 | 0.30615962 | 1.0185001  | -2.1090024 | -1.1332451 |             |                |
| DM09271P2 | 0.3061599  | -1.0443581 | -1.1872553 | 1.4030691  |             |                |
| DM07641P2 | 0.3062649  | 1.1852996  | -1.4462352 | 1.2576333  |             |                |
| DM05096P1 | 0.30637965 | 1.1982112  | -1.0698103 | -1.0388794 |             |                |
| DM04288P2 | 0.30639488 | 1.1977932  | 1.0559218  | 1.1526451  |             |                |
| DM09184P3 | 0.30659723 | -1.1542377 | 1.0130317  | -1.1812847 |             |                |
| DM06498P1 | 0.30665052 | 1.0956944  | -1.583045  | -1.0040674 |             |                |
| DM11860P2 | 0.3066554  | -1.0551796 | -1.2319013 | 1.021571   | LOC1001156  | XM_001600266.1 |
| DM11226P1 | 0.30671024 | -1.0763477 | 1.0948503  | -1.0568328 |             |                |
| DM10062P4 | 0.306736   | 1.0909592  | 1.038172   | 1.3589702  | TRIADDRAFT  | XM_002113539.1 |
| DM10742P3 | 0.3069775  | 1.013257   | 1.2077245  | -1.0205741 |             |                |
| DM06157P1 | 0.30704826 | 1.8180851  | 2.4755206  | 1.1462493  | CHORION PEI | XM_001868256.1 |
| DM09997P2 | 0.3071434  | -1.0016599 | -1.015935  | -1.2121209 |             |                |
| DM09633P2 | 0.30721736 | -1.1281545 | -1.0299355 | 1.030649   |             |                |

|           |            |            |            |            |            |                |
|-----------|------------|------------|------------|------------|------------|----------------|
| DM07419P2 | 0.3072805  | 1.0349209  | -1.0036443 | 1.0948738  |            |                |
| DM11533P2 | 0.3075074  | 1.0397174  | -1.0100899 | 1.1156409  |            |                |
| DM02341P1 | 0.3075135  | -1.1964775 | -1.2411152 | -1.0967519 | DWIL\GK173 | XM_002062040.1 |
| DM09803P2 | 0.30751947 | 1.0373039  | -1.1726862 | -1.3620237 |            |                |
| DM03992P3 | 0.30755565 | -1.0160699 | -1.0062028 | -1.2561144 | LOC409680  | XR_015084.1    |
| DM03695P1 | 0.30757824 | 1.2068099  | -1.739959  | 1.1843324  | DPER\GL162 | XM_002027804.1 |
| DM02347P1 | 0.307586   | 1.080681   | -1.1162809 | -1.0909938 | LOC1001222 | XM_001605781.1 |
| DM04509P3 | 0.30759197 | 1.1638806  | -1.2126367 | -1.0850893 |            |                |
| DM10936P1 | 0.30767715 | 1.2276808  | 1.3895519  | -1.1808182 | DYAK\GE163 | XM_002100008.1 |
| DM05744P3 | 0.30769837 | 1.0505778  | -1.315441  | -1.4196413 |            |                |
| DM01301P1 | 0.30770877 | -1.0849965 | -1.0963265 | -1.1605219 |            |                |
| DM12777P2 | 0.30773214 | 1.0212893  | -1.0298301 | 1.1113205  |            |                |
| DM13146P1 | 0.3077335  | 1.0594501  | 1.0877093  | 1.2050937  | BRAFLDRAFT | XM_002608605.1 |
| DM07861P3 | 0.30790395 | -1.013377  | 1.2108499  | 1.1752656  |            |                |
| DM09005P2 | 0.30815718 | -1.0304053 | 1.1261369  | 1.1173859  |            |                |
| DM07357P2 | 0.30823177 | 1.0814898  | 1.1276003  | 1.1101897  |            |                |
| DM01022P1 | 0.3082324  | -1.0307004 | 1.18906    | -1.4996272 | DYAK\GE163 | XM_002099998.1 |
| DM11674P3 | 0.3082986  | -1.0858204 | -1.5450314 | -1.3591242 |            |                |
| DM10477P3 | 0.3083211  | 1.0580828  | 1.3562346  | 1.2396973  |            |                |
| DM07027P3 | 0.3083856  | -1.3391635 | 1.4643435  | -2.0092332 |            |                |
| DM09346P1 | 0.30846226 | -1.1023657 | -1.4708633 | 1.0558771  |            |                |
| DM04333P3 | 0.30851212 | 1.0326856  | 1.017324   | -1.2337499 |            |                |
| DM09769P1 | 0.30856016 | -1.1211616 | -1.0103301 | 1.0163232  |            |                |
| DM08303P2 | 0.30856124 | -1.5130428 | 1.0057545  | -1.5080595 |            |                |
| DM06524P3 | 0.3086506  | -1.1173898 | -1.1432879 | -1.1307567 |            |                |
| DM13158P3 | 0.3086552  | -1.1561711 | -1.0199031 | 1.0794034  |            |                |
| DM12652P3 | 0.30868444 | 1.1928432  | 1.1142963  | -1.0804394 |            |                |
| DM14865P2 | 0.30892068 | -1.3213619 | -1.1454583 | -1.0051997 |            |                |
| DM02157P3 | 0.30892205 | -1.0592604 | -1.4831669 | -1.2781354 | PLOD       | XM_001653065.1 |
| DM11019P2 | 0.3089283  | 1.1709683  | 1.0207735  | -1.0825405 |            |                |
| DM11468P1 | 0.30903754 | 1.233363   | 1.2051014  | -1.1541737 |            |                |
| DM07344P3 | 0.30908212 | -1.6017135 | -1.3665036 | -1.3065443 |            |                |
| DM03630P1 | 0.3091909  | -1.0950238 | -1.3663695 | 1.8375826  |            |                |
| DM09713P1 | 0.30924025 | -1.0260313 | 1.1778301  | -1.1703261 |            |                |
| DM00949P3 | 0.30925635 | 1.0313805  | -1.0678118 | -1.0310847 | PHKB       | XM_001658505.1 |
| DM07178P1 | 0.3092726  | -1.1669528 | 1.0574918  | 1.1674224  |            |                |
| DM09480P1 | 0.30938494 | -1.2024515 | -1.0178545 | 1.0259857  |            |                |
| DM00557P3 | 0.3094279  | -1.0239263 | -1.1114246 | -1.1911751 | ISCW_ISCWC | XM_002409350.1 |
| DM01941P4 | 0.3094788  | -1.0590583 | -1.8102344 | 1.1510739  | DANA\GF153 | XM_001962188.1 |
| DM11542P1 | 0.30955347 | 1.010485   | -1.1196796 | 1.1345185  |            |                |
| DM13676P2 | 0.309615   | -1.0579454 | -1.0468602 | -1.2856758 | DPSE\GA204 | XM_001354085.2 |
| DM01920P3 | 0.3096561  | -1.1217391 | -1.0815997 | -1.0910717 |            |                |
| DM10215P2 | 0.30969843 | 1.0625885  | -1.0013572 | -1.3827218 |            |                |
| DM04649P1 | 0.30974832 | -1.0391194 | -1.0783845 | -1.1604444 |            |                |
| DM06983P3 | 0.30995214 | 1.0405173  | 1.0485309  | 1.1036245  |            |                |
| DM12492P1 | 0.31005672 | -1.0318836 | 1.0526783  | -1.0445707 |            |                |
| DM02854P3 | 0.31018955 | 1.0531113  | -1.2070365 | 1.2092601  | LOC657773  | XM_970898.1    |
| DM04345P3 | 0.31039405 | -1.1402812 | 1.1872108  | 1.1519382  | PHYPADRAFT | XM_001757345.1 |
| DM09435P1 | 0.3104365  | 1.0777283  | -1.1813315 | -1.3539995 |            |                |
| DM14873P1 | 0.31058806 | -1.048232  | -1.0921977 | 1.2245897  |            |                |

|           |            |            |            |            |             |                |
|-----------|------------|------------|------------|------------|-------------|----------------|
| DM09214P3 | 0.3106071  | 1.3332181  | 1.2106119  | -1.0905448 |             |                |
| DM00976P4 | 0.31067216 | 1.0002645  | -1.1405798 | 1.0277171  | SYT1A       | NM_001002463.1 |
| DM11817P4 | 0.31078738 | -1.2059224 | 1.2134417  | 1.1214486  |             |                |
| DM05518P1 | 0.31092507 | -1.025263  | 1.1546408  | 1.2139031  |             |                |
| DM05677P3 | 0.31093028 | -1.0055711 | 1.0321373  | -1.1713371 |             |                |
| DM08100P2 | 0.31110066 | 1.1753509  | 1.0431514  | 1.4765507  |             |                |
| DM10482P3 | 0.31116086 | -1.0593393 | -1.2657107 | -1.0041862 |             |                |
| DM00834P1 | 0.31119445 | -1.0135853 | -1.7693486 | 1.108169   | AAEL_AAEL0C | XM_001656773.1 |
| DM05408P2 | 0.3113534  | 1.2322512  | 1.0729539  | 1.5054727  |             |                |
| DM13421P1 | 0.3115239  | 1.0350152  | -1.1173629 | 1.4245989  |             |                |
| DM00864P3 | 0.31157324 | 1.0488127  | 1.0568217  | -1.150796  | FDH         | XM_393266.2    |
| DM09538P4 | 0.3116005  | 1.2086561  | 1.1250697  | 1.0038817  |             |                |
| DM12161P1 | 0.31164753 | -1.0290349 | 1.0804982  | -1.1522162 |             |                |
| DM11776P2 | 0.31172553 | 1.0856851  | 1.2432035  | -1.0461138 |             |                |
| DM00795P1 | 0.3118927  | -1.0627146 | 1.1190213  | 1.1508924  | DGR1\GH113' | XM_001988780.1 |
| DM02880P3 | 0.31190008 | -1.1377661 | 1.0285568  | 1.2328397  | LOC1002154: | XM_002156497.1 |
| DM09273P1 | 0.3119448  | 1.3149891  | 1.2867932  | 1.1677351  |             |                |
| DM15104P1 | 0.3119738  | 1.0635246  | 1.0577261  | -1.1023413 |             |                |
| DM14543P3 | 0.31204835 | -1.0150145 | 1.5454888  | 1.4089149  |             |                |
| DM12472P4 | 0.31205836 | 1.0850806  | 1.0028914  | 1.204225   | LOC610811   | XM_848364.1    |
| DM05892P2 | 0.31210837 | -1.0829052 | -1.1207494 | -1.0247341 |             |                |
| DM11928P1 | 0.31216854 | 1.0525286  | 1.062888   | 1.0148891  |             |                |
| DM11687P1 | 0.31220728 | -1.0559657 | -1.047633  | -1.1961495 | LOC657419   | XM_963880.1    |
| DM13645P2 | 0.31231627 | -1.1516237 | -1.0676064 | 1.0365906  |             |                |
| DM02787P3 | 0.31238744 | -1.0307406 | 1.0293084  | 1.149049   | DWIL\GK244' | XM_002066533.1 |
| DM00090P1 | 0.3124086  | -1.0578628 | 1.0821391  | -1.224322  | MANEA       | XM_001503820.1 |
| DM15240P1 | 0.31255564 | -1.0430133 | 1.1092738  | 1.1646603  | LOC1001682: | XM_001946111.1 |
| DM10729P3 | 0.312587   | -1.093075  | 1.150348   | -1.0750086 |             |                |
| DM10351P4 | 0.3125873  | 1.0392363  | -1.1118642 | 1.5218182  |             |                |
| DM14762P1 | 0.3126015  | 1.3433473  | -1.3545635 | -1.2207447 |             |                |
| DM13428P3 | 0.31262377 | -1.4613308 | -1.0026008 | -1.0360317 |             |                |
| DM12261P3 | 0.3126653  | 1.3277469  | 1.0555103  | 2.3780892  |             |                |
| DM05004P4 | 0.312748   | 1.0567003  | 1.3579952  | -1.0281826 |             |                |
| DM00914P1 | 0.3128075  | 1.0739684  | -1.0041732 | 1.1717839  |             |                |
| DM15086P1 | 0.3129001  | -1.1377391 | -1.1470724 | -1.0795513 |             |                |
| DM08114P2 | 0.3129095  | 1.1541189  | 1.2834709  | 1.062291   |             |                |
| DM14193P4 | 0.31292188 | 1.1497571  | 1.1157514  | 1.1880887  |             |                |
| DM11225P2 | 0.31293395 | -1.0530232 | -1.2607766 | -1.1889101 |             |                |
| DM06269P2 | 0.31299812 | -1.1011611 | 1.0566065  | 1.1271079  |             |                |
| DM12018P1 | 0.31302193 | -1.1215857 | -1.0079805 | -1.2832817 |             |                |
| DM03178P2 | 0.31304514 | -1.0511544 | 1.131737   | 1.3722585  |             |                |
| DM08257P1 | 0.31308734 | -1.0153037 | 1.1445738  | 1.1809818  |             |                |
| DM05828P2 | 0.31323075 | -1.1500293 | 1.1126804  | -1.0815678 | DUT         | XM_001165929.1 |
| DM04041P1 | 0.3134522  | -1.0635943 | 3.5254917  | -1.2251664 | NDUFB2      | NM_001097502.1 |
| DM12750P1 | 0.31348875 | 1.2708807  | 1.1098475  | 2.3779182  |             |                |
| DM02789P1 | 0.3135451  | -1.052717  | -1.0613989 | -1.2990291 | LOC1001649' | XM_001943987.1 |
| DM12081P4 | 0.31356648 | -1.0845689 | -1.0762843 | 1.0062757  |             |                |
| DM01176P3 | 0.31365892 | -1.0289898 | -1.1185648 | 1.0190158  |             |                |
| DM01805P2 | 0.31386712 | -1.0994375 | -1.1024498 | -1.1013737 | NDUFS3      | NM_001172315.1 |
| DM08691P3 | 0.3138783  | -1.0535984 | 1.0801872  | -1.2027584 |             |                |

|           |            |            |            |            |             |                |
|-----------|------------|------------|------------|------------|-------------|----------------|
| DM13556P3 | 0.3140525  | -1.0636039 | 1.1782247  | 1.0253385  |             |                |
| DM06670P1 | 0.31407434 | 1.0187898  | 1.0592688  | 1.0201522  |             |                |
| DM01728P2 | 0.31410939 | -1.432862  | -1.1937301 | -1.1353743 | LOC583310   | XM_001196888.1 |
| DM12026P3 | 0.31411123 | 1.0269978  | 1.0016356  | 1.1148041  |             |                |
| DM02352P2 | 0.31411558 | -1.2353723 | -1.1070437 | -1.2945076 |             |                |
| DM12410P1 | 0.3141424  | 1.7054313  | 1.6073192  | 1.2748599  |             |                |
| DM01709P2 | 0.3141942  | -1.250901  | 1.0147345  | 1.2597402  | DYAK\GE215  | XM_002093832.1 |
| DM06196P2 | 0.31419668 | 1.1576552  | 1.119706   | 1.0250064  | HSD17B4     | XM_969691.1    |
| DM05600P1 | 0.3142975  | 1.0545373  | 1.2291508  | -1.0675215 |             |                |
| DM04716P2 | 0.3144202  | 1.2109774  | -1.3576725 | 1.0856524  |             |                |
| DM01096P1 | 0.31443664 | -1.1491092 | -1.0503434 | -1.1727481 | RABGAP10    | XM_624846.2    |
| DM03151P1 | 0.31444317 | -1.0426193 | -1.0588634 | -1.1434275 |             |                |
| DM11989P3 | 0.31446505 | 1.154787   | 1.1265833  | -1.1352904 |             |                |
| DM09120P4 | 0.31450725 | 1.1334215  | -1.3875883 | 1.7528411  |             |                |
| DM11366P1 | 0.31450757 | -1.3770368 | 1.0691628  | -1.1058531 |             |                |
| DM04636P4 | 0.31458297 | -1.0940548 | 1.1379339  | 1.1062199  |             |                |
| DM00101P4 | 0.31459433 | -1.0653394 | 1.2878562  | 1.2792877  | DSEC\GM186  | XM_002038044.1 |
| DM11284P1 | 0.31460238 | 1.071133   | -1.038528  | 1.1278902  |             |                |
| DM01549P2 | 0.31473202 | -1.0249909 | 1.0247515  | 1.009264   | NCU07340    | XM_957405.1    |
| DM12842P1 | 0.31477162 | 1.7330493  | 2.6952007  | 1.1945592  |             |                |
| DM03205P3 | 0.31511617 | 1.0566316  | 1.0965062  | 1.2571896  | LOC1001986  | XM_002167631.1 |
| DM04517P3 | 0.31518003 | 1.1029305  | -1.1356747 | 1.0847865  |             |                |
| DM14246P3 | 0.31536752 | -1.138466  | -1.0647464 | 1.0993685  |             |                |
| DM07737P1 | 0.3154274  | -1.067506  | -1.1175963 | -1.045447  |             |                |
| DM13649P1 | 0.3154327  | 1.1227978  | 1.0954965  | 1.1474189  |             |                |
| DM06928P3 | 0.31547    | 1.078641   | 1.1903049  | 1.0644451  |             |                |
| DM01553P1 | 0.31550252 | -1.0089036 | -1.0439267 | -1.0247846 | LOC577743   | XM_777955.2    |
| DM05678P4 | 0.31551683 | 1.0541458  | -1.1704456 | 1.508065   | LOC1000280  | XM_001378156.1 |
| DM07503P3 | 0.31553847 | 1.0375048  | 1.1383941  | 1.0296605  |             |                |
| DM01890P1 | 0.31554562 | -1.0399269 | 1.1825052  | 1.1424379  | DERE\GG220  | XM_001974965.1 |
| DM10989P3 | 0.3157955  | 1.1408095  | 1.0889373  | 1.1107978  |             |                |
| DM02327P3 | 0.3158173  | 1.0367633  | -1.1084813 | -1.0508478 | DWIL\GK128  | XM_002073939.1 |
| DM07872P3 | 0.31594265 | 1.7032683  | 1.2111572  | 2.1098292  |             |                |
| DM09482P1 | 0.31600976 | 1.2126268  | 1.1522394  | -1.0206745 |             |                |
| DM12375P2 | 0.31616503 | 1.187343   | 1.1140894  | 1.1104966  |             |                |
| DM07143P1 | 0.31617546 | -1.1039889 | -1.0164446 | 1.1997471  | AGAP_AGAP0  | XM_001688343.1 |
| DM10132P4 | 0.31630245 | 1.1078616  | 1.0800022  | -1.0627654 |             |                |
| DM06086P2 | 0.3163134  | -1.1474924 | 1.0019102  | 1.0661128  |             |                |
| DM00331P3 | 0.31634408 | -1.0331682 | 1.200003   | -1.5104895 | DANA\GF194  | XM_001966018.1 |
| DM03783P3 | 0.3163782  | 1.0477498  | 1.0683068  | -1.0760577 | LOC1000139  | XM_001368256.1 |
| DM08553P1 | 0.31639254 | 1.0835357  | 1.0611423  | -1.0082655 |             |                |
| DM07966P3 | 0.31645396 | -1.0325202 | 1.0667197  | 1.1066056  |             |                |
| DM05909P1 | 0.3165023  | -1.1177902 | 2.3954332  | 1.0848463  | AGAP_AGAP0  | XM_318638.4    |
| DM03422P1 | 0.31652942 | 1.1419475  | -1.2257134 | -1.3157439 | CG34348     | NM_001103484.1 |
| DM04093P1 | 0.31670782 | 1.1303548  | 1.3209792  | 1.3087618  |             |                |
| DM13947P2 | 0.31672123 | 1.007503   | -1.0969015 | 1.2330878  |             |                |
| DM07147P1 | 0.31672406 | 1.2814224  | -1.0070044 | 1.1619174  |             |                |
| DM01583P3 | 0.31674996 | -1.0825433 | -1.0736649 | 1.072855   | RPL10A      | XM_001656454.1 |
| DM12242P2 | 0.31675464 | 1.0101137  | -1.001555  | -1.2108608 |             |                |
| DM07096P1 | 0.31678864 | -1.0560678 | 1.0664961  | 1.1040452  | DVIR\GJ2335 | XM_002053371.1 |

|           |            |            |            |            |                           |
|-----------|------------|------------|------------|------------|---------------------------|
| DM05179P2 | 0.31684092 | -1.0129145 | -1.0718737 | -1.1554465 |                           |
| DM02289P4 | 0.31688225 | 1.2221745  | 1.0383056  | -1.0191553 | DWIL\GK168\XM_002061985.1 |
| DM00489P3 | 0.3169876  | -1.1262989 | -1.1734577 | -1.0789882 | ISCW_ISCWC XM_002412535.1 |
| DM03394P2 | 0.31702864 | 1.0021061  | 1.0670357  | -1.2557691 | ZGC:101577 NM_001013542.1 |
| DM06418P3 | 0.31708032 | -1.0674311 | 1.1449403  | -1.1546608 |                           |
| DM09132P3 | 0.31708813 | -1.2191362 | -1.0025791 | -1.0305765 |                           |
| DM02635P4 | 0.3171117  | -1.1212914 | -1.0366232 | -1.124193  | DHRS7B NM_001078778.1     |
| DM00471P1 | 0.31714356 | 1.1824645  | 1.0383044  | 1.0036383  | DGRI\GH233\XM_001994131.1 |
| DM12776P3 | 0.31716463 | 1.4071003  | -1.60253   | 1.1864535  |                           |
| DM02505P1 | 0.31729817 | -1.0179783 | -1.5140748 | -1.1337517 |                           |
| DM10879P1 | 0.3173305  | 1.0701445  | -1.073655  | -1.0998964 |                           |
| DM00118P3 | 0.31743845 | -1.0533501 | -1.037062  | -1.2314748 | BETACOP XM_001120953.1    |
| DM12558P1 | 0.31744924 | 1.0766282  | 1.2253567  | 1.0560646  |                           |
| DM07026P1 | 0.31747314 | 1.142285   | -1.0078552 | 1.0927997  |                           |
| DM05150P1 | 0.31760615 | -1.0419719 | -1.0197014 | 1.0724955  | LOC1001522\XM_001925041.1 |
| DM05822P1 | 0.3176177  | -1.2162135 | 1.0075903  | 1.0594922  | LOC1002248\XM_002190562.1 |
| DM00086P2 | 0.31764445 | -1.128151  | -1.0968355 | -1.1254969 | CCT7 NM_001142855.1       |
| DM05071P2 | 0.31772745 | -1.1221566 | -1.4347197 | -1.1668551 |                           |
| DM13711P3 | 0.31772777 | 1.0597628  | -1.2654452 | -1.0044315 |                           |
| DM08625P4 | 0.3178269  | -1.2464042 | 1.1544521  | 1.0021641  |                           |
| DM05310P3 | 0.31792873 | -1.2318342 | -1.3133295 | -1.2849153 |                           |
| DM03044P2 | 0.31798583 | 1.0587552  | -1.0268233 | 1.0858805  | LOC411631 XM_395100.2     |
| DM10573P1 | 0.3180855  | 1.1079752  | 1.1566827  | 1.1130093  |                           |
| DM06172P3 | 0.3181387  | -1.1580452 | -1.0929178 | 1.0267458  |                           |
| DM10699P2 | 0.31814387 | 1.0462257  | 1.0661854  | -1.0712459 |                           |
| DM13090P3 | 0.318147   | -1.5107543 | 1.0007238  | -1.1950144 |                           |
| DM04742P1 | 0.31817517 | -1.012752  | -1.206541  | 1.096037   |                           |
| DM11381P1 | 0.31827128 | 1.1557033  | -1.1681131 | 1.085117   |                           |
| DM02395P1 | 0.31835097 | -1.0273578 | -1.0409257 | -1.1738099 | LOC1001614\XM_001945089.1 |
| DM10296P1 | 0.31863463 | 1.2167615  | 1.4637808  | -1.1859617 |                           |
| DM08580P2 | 0.3186821  | -1.1060961 | 1.3391836  | 1.0452439  |                           |
| DM10633P3 | 0.31871736 | -1.1155264 | -1.2091256 | -1.1054966 |                           |
| DM11121P1 | 0.31875372 | 1.046808   | 1.0971081  | -1.1025933 |                           |
| DM04406P1 | 0.31876484 | -1.1913736 | -1.3296278 | 1.0366181  | LOC1002265\XM_002198704.1 |
| DM04665P1 | 0.31876704 | -1.0288088 | 1.0838171  | 1.095495   | GSPATT0001\XM_001448596.1 |
| DM02665P1 | 0.31884605 | 1.1806974  | -1.736119  | 1.1263678  |                           |
| DM09471P1 | 0.31894448 | 2.3382208  | 2.2499225  | 1.6939759  |                           |
| DM05060P1 | 0.31912956 | -1.1006292 | -1.2198921 | -1.2692354 | LOC1000823\XM_001512998.1 |
| DM06139P2 | 0.31934842 | -1.1125221 | -1.0498806 | -1.0986964 | CRP3 XM_385816.1          |
| DM09527P1 | 0.31941637 | 1.0962751  | -1.4608808 | -1.0274141 |                           |
| DM04177P4 | 0.31962425 | 1.1939884  | 1.1969965  | -1.1408752 | TVAG_02481\XM_001309399.1 |
| DM09499P3 | 0.3196313  | -1.0279113 | -1.3342109 | -1.2279797 |                           |
| DM01591P3 | 0.3198044  | 1.0057049  | -1.0050039 | 1.0284364  | ACT57B NM_079076.3        |
| DM14585P1 | 0.32006496 | 1.2652264  | -1.429678  | 1.3130449  |                           |
| DM06219P1 | 0.3200961  | 1.2672865  | 1.2262973  | 1.1509163  |                           |
| DM08403P3 | 0.32030523 | -1.1693151 | -1.2503783 | -1.141381  |                           |
| DM00483P4 | 0.32041645 | -1.0444297 | 1.1383077  | -1.0223936 | DGRI\GH168\XM_001994352.1 |
| DM15225P3 | 0.32051477 | -1.1829602 | -1.0773125 | -1.0190701 |                           |
| DM01785P2 | 0.32068634 | -1.0603166 | -1.2014489 | -1.0775974 | ISCW_ISCWC XM_002413524.1 |
| DM10613P3 | 0.32072806 | -1.2804446 | -1.1566778 | -1.0568724 |                           |

|           |            |            |            |            |             |                |
|-----------|------------|------------|------------|------------|-------------|----------------|
| DM02769P2 | 0.3207405  | 1.0527815  | -1.0220947 | -1.2068876 |             |                |
| DM14851P3 | 0.32099625 | -1.1345127 | 1.1555582  | 1.0985471  |             |                |
| DM14644P1 | 0.32110542 | 1.019657   | -1.5469382 | -1.0602989 |             |                |
| DM08918P1 | 0.32114214 | -1.0752904 | 1.1847876  | 1.2478722  | HNRNPH3     | NM_001012592.1 |
| DM00203P2 | 0.3211773  | -1.0456709 | -1.2773411 | -1.2063379 | DGR1\GH221! | XM_001987844.1 |
| DM08651P2 | 0.32131    | -1.0293458 | 1.136214   | -1.0286573 |             |                |
| DM10169P2 | 0.32131207 | -1.0563995 | 1.1158105  | 1.0081428  |             |                |
| DM04189P1 | 0.32132655 | -1.0632372 | -1.088771  | -1.1711583 | AAEL_AAEL01 | XM_001663332.1 |
| DM10609P3 | 0.32148865 | -1.0461462 | 1.1525277  | -1.1034547 |             |                |
| DM10899P2 | 0.3214986  | -1.2127343 | 1.0759612  | -1.3047427 |             |                |
| DM03067P1 | 0.3215732  | 1.1367825  | 1.0859804  | 1.2240884  | TPM         | XM_001655904.1 |
| DM10158P1 | 0.3215765  | 1.4993455  | 1.2073427  | 1.2582934  |             |                |
| DM06345P2 | 0.32159072 | -1.0342327 | -1.7625343 | 2.4196975  |             |                |
| DM01496P3 | 0.32161957 | -1.0886309 | -1.0511239 | -1.1260675 | LOC732876   | NM_001046879.1 |
| DM04294P4 | 0.32163298 | 1.0722247  | -1.2789651 | 1.0415828  |             |                |
| DM11526P1 | 0.32163614 | -1.0477891 | 1.0585887  | -1.1840788 |             |                |
| DM13953P2 | 0.32186732 | -1.1871938 | 1.0664203  | -1.0195518 |             |                |
| DM10343P1 | 0.32191548 | -1.1238856 | -1.0315909 | -1.1223557 |             |                |
| DM00187P2 | 0.32199648 | -1.0131003 | -1.0160663 | 1.1215694  | LOC657573   | XM_964025.2    |
| DM08136P1 | 0.32201383 | -1.0535675 | 1.0523539  | -1.2707764 |             |                |
| DM10302P3 | 0.32213053 | -1.022504  | -1.3530755 | -1.0671285 |             |                |
| DM07335P4 | 0.32235217 | -1.0848083 | -1.7377496 | 1.3548546  |             |                |
| DM08700P1 | 0.32237068 | 1.3126001  | -1.1194311 | -1.2328479 |             |                |
| DM01307P2 | 0.32262185 | -1.0586506 | 1.1469111  | 1.3551008  |             |                |
| DM13192P4 | 0.32270518 | -1.1556659 | 1.0063738  | -1.0232316 |             |                |
| DM00027P4 | 0.32273412 | -1.1096157 | -1.0192459 | -1.2337523 | LOC656498   | XM_963024.1    |
| DM01750P3 | 0.32273903 | -1.0164887 | -1.2422252 | 1.2248062  | AAEL_AAEL0C | XM_001656772.1 |
| DM13086P1 | 0.32280135 | 1.0146763  | 1.0687182  | 1.0612872  |             |                |
| DM13846P1 | 0.3228298  | 1.3691123  | -1.0074879 | -1.1861012 |             |                |
| DM07041P3 | 0.32283694 | -1.0622663 | -1.0893713 | -1.2332549 |             |                |
| DM07070P3 | 0.32286525 | 1.1043632  | 1.118978   | 1.0772879  |             |                |
| DM01499P3 | 0.3228659  | -1.1662486 | -1.5128577 | 1.0616916  | DVIR\GJ1552 | XM_002060027.1 |
| DM02381P3 | 0.32291558 | -1.1863889 | -1.0434612 | 1.0187325  | ZGC:194768  | NM_001135129.1 |
| DM07670P3 | 0.32306132 | -1.2446353 | -1.2402067 | 1.2054772  |             |                |
| DM02061P1 | 0.3231582  | -1.099443  | -1.0530897 | 1.1274465  | RPL22       | NM_009079.2    |
| DM11439P1 | 0.32328027 | -1.0234419 | -1.0120388 | -1.0904973 |             |                |
| DM07977P1 | 0.32334742 | -1.2477325 | -1.1450454 | -1.2959509 |             |                |
| DM15093P4 | 0.32357222 | -1.009212  | -1.4360023 | 1.1166605  |             |                |
| DM11431P3 | 0.32357806 | 1.102032   | 1.1123762  | 1.0652223  |             |                |
| DM10089P1 | 0.3236521  | -1.0645748 | 1.2148687  | -1.0312359 |             |                |
| DM03732P2 | 0.32388765 | 1.2420682  | -1.9085042 | 1.065196   |             |                |
| DM09831P1 | 0.32392475 | -1.2010307 | -1.4876549 | 1.056692   |             |                |
| DM02085P1 | 0.32394332 | 1.2230244  | 1.9325616  | -1.4363925 | THAPSDRAFT  | XM_002285900.1 |
| DM03934P3 | 0.32395664 | 1.1275926  | 1.2832388  | 1.1073382  |             |                |
| DM11451P1 | 0.32401803 | -1.0429701 | 1.135482   | 1.1719868  |             |                |
| DM05192P3 | 0.32408607 | -1.1285504 | 1.0477535  | -1.0800562 |             |                |
| DM11656P3 | 0.32413638 | -1.0151353 | 1.0381764  | -1.073229  | DRK         | XM_623351.2    |
| DM07154P2 | 0.32435298 | -1.0221528 | 1.0172768  | -1.1044531 |             |                |
| DM09647P3 | 0.32442254 | 1.1984651  | 1.2372918  | 1.0203173  |             |                |
| DM11228P1 | 0.32449302 | -1.0028915 | 1.1056293  | 1.0567752  |             |                |

|           |            |            |            |            |                           |
|-----------|------------|------------|------------|------------|---------------------------|
| DM15229P3 | 0.32450652 | 1.0730823  | -1.2688371 | 1.0344495  |                           |
| DM08681P3 | 0.32456797 | -1.0633675 | 1.2267755  | 1.2110614  |                           |
| DM00418P1 | 0.32464534 | 1.083614   | 1.1413072  | 1.1318437  | DYAK\GE157:XM_002101207.1 |
| DM15076P1 | 0.32465598 | -1.0910861 | 1.0423918  | 1.1693194  |                           |
| DM06466P3 | 0.32469314 | 1.0087479  | -1.1162502 | -1.1526861 |                           |
| DM14470P3 | 0.32483485 | -1.4959763 | -1.2349637 | -1.3501221 |                           |
| DM12887P2 | 0.32488587 | -1.0423796 | 1.0503359  | -1.2327076 |                           |
| DM05641P2 | 0.3251827  | 1.0125532  | 1.1414636  | 1.0114703  |                           |
| DM03597P3 | 0.3252266  | 1.0938804  | 1.1122122  | 1.1651409  |                           |
| DM02419P1 | 0.325305   | 1.1400535  | -1.4547522 | 1.8095965  | CYP4AB20 XM_001599684.1   |
| DM05657P2 | 0.32531297 | 1.0560147  | 1.2007595  | 1.0908835  |                           |
| DM06421P2 | 0.32531393 | 1.0280861  | 1.1111282  | -1.059782  |                           |
| DM03607P1 | 0.32543802 | 1.0910364  | 1.1132258  | 1.0717199  | DMOJ\GI133:XM_002008157.1 |
| DM11295P2 | 0.32547095 | -1.0107821 | 1.0095646  | -1.1546298 |                           |
| DM06130P3 | 0.32550326 | 1.01001    | 1.1688368  | 1.3752131  | DERE\GG139 XM_001979128.1 |
| DM01928P2 | 0.32561278 | 1.1621585  | 1.076228   | 1.0467061  |                           |
| DM06735P1 | 0.32568538 | -1.0144193 | -1.1398907 | -1.1101704 |                           |
| DM02362P2 | 0.32574478 | 1.1611677  | 1.0061241  | 1.1467565  | DPER\GL137:XM_002020012.1 |
| DM06027P2 | 0.3257779  | 1.2746735  | 1.5508453  | -1.0046694 | CP9 NM_001172259.1        |
| DM10262P2 | 0.32584    | 1.1211181  | -1.1154224 | -1.2366916 |                           |
| DM02780P1 | 0.32588524 | -1.1153573 | -1.067482  | -1.2549556 |                           |
| DM10591P1 | 0.32611322 | -1.1053476 | 1.0044872  | -1.0577308 |                           |
| DM08044P1 | 0.3261333  | 1.1690708  | -1.7587626 | 1.2607436  |                           |
| DM13233P1 | 0.32619515 | -1.0497644 | 1.0687937  | 1.27418    | DWIL\GK120:XM_002067989.1 |
| DM07822P3 | 0.32623038 | -1.2427112 | -1.2097082 | 1.0697577  |                           |
| DM13815P1 | 0.3262382  | 1.1368017  | -1.2363012 | -1.1012033 |                           |
| DM13600P4 | 0.32624346 | 1.0555556  | -1.0634114 | -1.0777293 |                           |
| DM02774P4 | 0.326316   | 1.2004926  | -1.0164704 | -1.3242908 | SSADH NM_001014665.1      |
| DM00509P3 | 0.32636988 | -1.1754869 | -1.075959  | -1.0764948 | DWIL\GK126:XM_002067801.1 |
| DM09825P3 | 0.3263954  | -1.0672922 | -1.1743184 | -1.2098902 | DANA\GF184 XM_001954740.1 |
| DM02451P3 | 0.3264737  | -1.1651471 | -1.0628766 | 1.1945096  | LOC1001607:NM_001160343.1 |
| DM12254P1 | 0.32668814 | 1.0790919  | -1.1568999 | 1.0773236  |                           |
| DM05236P2 | 0.32673886 | 1.0527658  | 1.1205736  | 1.2421888  |                           |
| DM14249P4 | 0.32680145 | 1.0052114  | -1.3153733 | -1.3273383 |                           |
| DM07767P1 | 0.32696795 | -1.022319  | -1.1697949 | 1.0485253  |                           |
| DM05010P3 | 0.32706282 | 1.1503068  | 1.2565881  | -1.1071844 | ISCW_ISCWC XM_002414405.1 |
| DM10103P2 | 0.32708597 | 1.0111611  | 1.2909508  | 1.2480739  |                           |
| DM02781P4 | 0.32710576 | 1.8621011  | 1.2432152  | 1.3130887  | DSEC\GM180 XM_002037815.1 |
| DM03528P2 | 0.32721886 | 1.5765193  | 1.3812414  | 1.6510961  | DMOJ\GI152:XM_002009368.1 |
| DM07166P1 | 0.32722718 | -1.1614062 | -1.1300671 | 1.0700462  |                           |
| DM14185P3 | 0.32725418 | -1.1696814 | -1.0104887 | 1.1728302  |                           |
| DM13415P1 | 0.32728854 | -1.1296355 | -1.073105  | 1.05234    |                           |
| DM14074P3 | 0.3274728  | -1.2176056 | -1.1053509 | 1.0514531  | DANA\GF209 XM_001964004.1 |
| DM09727P2 | 0.3275572  | 1.2279657  | 1.3001848  | -1.0701803 |                           |
| DM01148P1 | 0.3275775  | 1.0206153  | 1.207175   | 1.0927055  |                           |
| DM07944P2 | 0.3276634  | -1.1998247 | -1.102312  | -1.2466595 |                           |
| DM10354P1 | 0.3276778  | -1.1140835 | -1.060852  | -1.2338175 |                           |
| DM11062P2 | 0.32818007 | -1.1873529 | -1.0300614 | -1.0237895 |                           |
| DM08424P1 | 0.3282177  | 1.6671226  | 2.2936323  | 1.4515256  |                           |
| DM07765P1 | 0.32825708 | -1.0943192 | -1.0240209 | 1.1593589  |                           |

|           |            |            |            |            |              |                |
|-----------|------------|------------|------------|------------|--------------|----------------|
| DM03980P1 | 0.32830802 | -1.0025914 | 1.0024395  | 1.1582868  |              |                |
| DM00132P2 | 0.32836327 | 1.1577747  | 1.3075334  | 1.172039   | EIP74EF      | XM_001650594.1 |
| DM11566P2 | 0.32842317 | -1.0649456 | -1.0386496 | -1.2868161 |              |                |
| DM06636P3 | 0.32851946 | 1.0194618  | 1.0592452  | -1.10845   |              |                |
| DM12769P1 | 0.32853115 | -1.0968773 | 2.2316735  | -1.1233612 |              |                |
| DM10281P3 | 0.32854044 | 1.0365534  | -1.0211306 | -1.3160211 |              |                |
| DM01055P3 | 0.3286547  | -1.0490168 | -1.1588938 | -1.0161957 | RPL4         | XM_001650221.1 |
| DM12425P1 | 0.32875058 | 1.3032566  | -1.0857131 | 1.3821512  |              |                |
| DM14231P2 | 0.32878312 | 1.0322137  | 1.6990525  | 1.2767295  |              |                |
| DM11405P2 | 0.32893464 | 1.1280774  | -1.3679327 | 1.115568   |              |                |
| DM02634P2 | 0.3289428  | 1.1467052  | 1.2100552  | 1.0325209  | MADM         | XM_623816.2    |
| DM00455P1 | 0.3289778  | 1.0138528  | -1.0175928 | 1.1912221  | DGRI\GH211   | XM_001986087.1 |
| DM05845P2 | 0.3290477  | -1.3149648 | -1.1558229 | -1.1674538 | LOC659617    | XM_965908.1    |
| DM06994P2 | 0.3290689  | 1.2189862  | 1.0267956  | 1.1362185  |              |                |
| DM00327P3 | 0.32911187 | -1.040383  | -1.3890053 | 1.0491623  | DGRI\GH249   | XM_001992662.1 |
| DM04044P2 | 0.32925022 | -1.1424276 | -1.0962757 | -1.0965556 | LOC1001689   | XM_001952186.1 |
| DM10145P1 | 0.32933527 | -1.0888464 | -1.1397276 | -1.0886747 |              |                |
| DM06062P1 | 0.32933864 | -1.0443816 | 1.0447911  | -1.0491228 | GOT2         | NM_001131416.1 |
| DM08190P1 | 0.32938874 | 1.0388732  | 1.1430476  | 1.1626215  |              |                |
| DM09607P1 | 0.32941088 | -1.005596  | 1.1119102  | -1.0531757 |              |                |
| DM06565P1 | 0.32962254 | 1.2010777  | 1.2383236  | 1.0806038  |              |                |
| DM05405P1 | 0.32964677 | -1.0544208 | 1.106243   | 1.0495408  |              |                |
| DM02546P2 | 0.329694   | 1.0904295  | 1.3896121  | 1.4075491  | DERE\GG174   | XM_001980878.1 |
| DM07279P1 | 0.32970864 | -1.2034187 | -2.808799  | 1.1366065  |              |                |
| DM00710P2 | 0.3298402  | 1.0123245  | -1.150641  | -1.2071822 | LOC1001691   | XM_001950341.1 |
| DM00619P3 | 0.32989085 | -1.0038807 | 1.0800674  | 1.1243486  | LOC1000196   | XM_001372416.1 |
| DM05857P1 | 0.33009693 | -1.1560053 | 1.0161232  | 1.1787385  | CPIPJ_CPIJOC | XM_001843985.1 |
| DM05265P3 | 0.3301548  | 1.2085036  | 1.2925596  | 1.0838097  |              |                |
| DM00335P3 | 0.33034524 | -1.1976482 | -1.0194668 | -1.0754629 | BM1_02745    | XM_001892016.1 |
| DM03409P4 | 0.3304014  | 1.0748558  | 1.1707231  | 1.1860565  |              |                |
| DM07425P2 | 0.3306882  | -1.2138635 | -1.0816237 | -1.0933366 | LOC726657    | XM_001122378.1 |
| DM02090P2 | 0.33071202 | 1.0976706  | 1.042838   | 1.0566689  | LOC763463    | XM_001199448.1 |
| DM14912P4 | 0.33073828 | 1.0643194  | -1.2247571 | 1.0825897  |              |                |
| DM08221P2 | 0.33074215 | -1.0324671 | 1.0917063  | 1.5306478  |              |                |
| DM06752P3 | 0.33080253 | 1.0269992  | 1.4108584  | 1.754168   |              |                |
| DM00461P1 | 0.3308204  | -1.1953168 | -1.0074642 | -1.0172815 | DYAK\GE219   | XM_002094661.1 |
| DM02293P1 | 0.33093184 | 1.119965   | 1.282513   | 1.0296288  | BRAFLDRAFT   | XM_002611791.1 |
| DM13652P1 | 0.3309491  | -1.074144  | -1.071156  | -1.1388592 |              |                |
| DM02180P3 | 0.33111054 | -1.1836529 | -1.2143238 | -1.133199  | LOC1002268   | XM_002200572.1 |
| DM07587P3 | 0.33112937 | 1.0365496  | 1.1557504  | -1.0299042 |              |                |
| DM08880P2 | 0.33124495 | 1.0181959  | -1.2635311 | -1.131818  |              |                |
| DM01249P1 | 0.33135894 | -1.0716203 | -1.1045916 | -1.2194488 |              |                |
| DM12733P1 | 0.33136085 | -1.0652069 | -1.2468214 | -1.0656128 |              |                |
| DM15316P2 | 0.3313965  | -1.177427  | 1.0703617  | 1.1227041  |              |                |
| DM03215P3 | 0.3314381  | 1.0141104  | 1.1032045  | -1.0713036 | CYCB         | NM_001161460.1 |
| DM02633P3 | 0.3314615  | 1.1553077  | 1.0639408  | 1.1075094  | F23B12.5     | NM_074178.5    |
| DM08319P3 | 0.33149666 | -1.047568  | 1.16203    | -1.1503347 |              |                |
| DM14455P3 | 0.3316494  | -1.0899569 | 1.020041   | 1.1395699  |              |                |
| DM01827P3 | 0.33172345 | 1.0481504  | 1.1987219  | 1.0768709  |              |                |
| DM10286P3 | 0.33181593 | -1.1827439 | -1.0697925 | -1.0063673 |              |                |



|            |            |            |            |            |            |                |
|------------|------------|------------|------------|------------|------------|----------------|
| DM01172P2  | 0.3319015  | -1.1081372 | -1.258118  | -1.7401476 | ZGC:110348 | NM_001109847.1 |
| DM11716P3  | 0.33201483 | 1.2185344  | 1.1602222  | -1.596888  |            |                |
| DM04471P1  | 0.3320216  | 1.2500834  | 1.6445781  | -1.1117985 |            |                |
| DM10061P2  | 0.3320429  | 1.0592983  | 1.4628756  | 1.2945958  |            |                |
| DM111131P3 | 0.33218375 | -1.102446  | 1.0577446  | 1.0115339  |            |                |
| DM08789P2  | 0.33231717 | 1.1304133  | 1.1277535  | -1.1191003 | EHI_007620 | XM_001913542.1 |
| DM06657P2  | 0.33240122 | -1.2193129 | -1.1580552 | 1.1367251  |            |                |
| DM03288P1  | 0.33241138 | 1.0049996  | 1.2452679  | 1.1999054  | ISCW_ISCWC | XM_002401303.1 |
| DM10155P3  | 0.3324185  | 1.035945   | -1.0652391 | 1.1371827  |            |                |
| DM05327P3  | 0.33242837 | -1.0669512 | 1.1621213  | -1.0075965 |            |                |
| DM15034P2  | 0.3325659  | 1.1328709  | 1.1578511  | -1.0140802 |            |                |
| DM00983P1  | 0.33276772 | -1.0338694 | -1.1126275 | 1.1765496  | CG34350    | NM_136593.2    |
| DM10579P1  | 0.3328033  | -1.0291907 | -1.1464027 | -1.1744671 | LOC1001659 | XM_001948827.1 |
| DM06413P3  | 0.33285052 | 1.1117979  | -1.0073302 | -1.1150948 | DYAK\GE104 | XM_002088910.1 |
| DM11202P2  | 0.33289307 | -1.2947139 | -1.212727  | -1.335654  |            |                |
| DM09678P2  | 0.33295843 | -1.1768504 | 1.034841   | 1.1102496  |            |                |
| DM09465P3  | 0.33296686 | -1.0130763 | -1.1384001 | -1.1598194 |            |                |
| DM09414P1  | 0.33300778 | -1.0678111 | 1.2298357  | 1.1032561  |            |                |
| DM06087P1  | 0.33313224 | -1.0567787 | 1.0162675  | -1.0425091 | DWIL\GK156 | XM_002063864.1 |
| DM03860P1  | 0.33316818 | 1.0253888  | -1.0037613 | -1.1143669 |            |                |
| DM15317P2  | 0.3332378  | -1.0414077 | 1.2143337  | 1.0234698  |            |                |
| DM09993P4  | 0.33323973 | 1.2883171  | 1.3781464  | 1.6896315  |            |                |
| DM05724P1  | 0.33339372 | 1.0407463  | 1.0103631  | -1.0856507 |            |                |
| DM12187P1  | 0.3334091  | -1.2445797 | -1.5838279 | -1.1836679 |            |                |
| DM13059P3  | 0.33344832 | -1.1755843 | -1.2583449 | 1.0851113  |            |                |
| DM07706P2  | 0.3334812  | 1.1033353  | 1.1135627  | -1.0932069 |            |                |
| DM04432P3  | 0.3335191  | 1.1025056  | -1.6542841 | 1.3140877  |            |                |
| DM05222P2  | 0.3335455  | 1.0862013  | 1.2867066  | 1.4101659  |            |                |
| DM14654P4  | 0.33382264 | -1.3782433 | -1.1671828 | 1.1216542  |            |                |
| DM10738P2  | 0.33392605 | -1.0409827 | -1.1620586 | 1.118122   |            |                |
| DM11636P3  | 0.33401248 | 1.1649129  | -1.2843353 | -1.1682082 |            |                |
| DM00722P1  | 0.3341648  | -1.0947913 | -1.1209027 | -1.0066721 |            |                |
| DM10736P3  | 0.3341768  | 1.1326097  | 1.09816    | 1.0739665  |            |                |
| DM01394P3  | 0.3343225  | 1.429813   | 1.2470728  | 1.0737541  |            |                |
| DM01882P1  | 0.3343514  | 1.1342564  | -1.0052627 | 1.0467602  | NEMVEDRAFT | XM_001624589.1 |
| DM02177P3  | 0.33440042 | -1.0037966 | 1.1419243  | 1.2787057  | LOC551998  | XM_624380.2    |
| DM01018P2  | 0.33476266 | -1.1042361 | -1.1833225 | -1.1173568 | LOC663948  | XM_969975.1    |
| DM06079P1  | 0.3348933  | 1.2612932  | -1.2923563 | 2.5056498  |            |                |
| DM01632P3  | 0.33503044 | -1.1124115 | -1.013469  | 1.0381093  | TFB1M      | NM_001133415.1 |
| DM06330P1  | 0.33505386 | 1.1842487  | 1.8559768  | -1.4236552 |            |                |
| DM09368P4  | 0.33506083 | -1.0889875 | -1.673308  | -1.0740091 |            |                |
| DM12100P1  | 0.3350654  | 1.0937893  | 1.015089   | -1.0829476 |            |                |
| DM08410P2  | 0.3352452  | 1.2347125  | -1.1694659 | -1.0991734 |            |                |
| DM09223P1  | 0.33537206 | -1.1330028 | 1.1172303  | 1.310587   |            |                |
| DM02834P3  | 0.33539563 | -1.1594533 | -1.0863391 | -1.1338664 | MVK        | XM_001657775.1 |
| DM04826P1  | 0.33539954 | -1.0837948 | -1.1680257 | -1.1049606 | DWIL\GK128 | XM_002074059.1 |
| DM12151P2  | 0.3354059  | -1.0140828 | 1.007146   | -1.1633219 |            |                |
| DM00506P1  | 0.33550024 | 1.1480712  | -1.4191991 | 1.1874074  | DERE\GG141 | XM_001971849.1 |
| DM13399P3  | 0.33552286 | -1.1565772 | -1.070113  | 1.0607468  |            |                |
| DM12323P2  | 0.3355889  | 1.0266138  | 1.0768038  | 1.1055815  |            |                |

|           |            |            |            |            |            |                |
|-----------|------------|------------|------------|------------|------------|----------------|
| DM00262P2 | 0.33572188 | 1.157976   | 1.0547445  | 1.1012506  | LOC663193  | XM_969251.2    |
| DM00099P1 | 0.3357761  | 1.0148518  | 1.0224413  | -1.0712526 | LOC580289  | XM_780359.2    |
| DM13987P1 | 0.33582053 | -1.070863  | 1.009011   | 1.0579438  | LOC1001239 | XM_001607642.1 |
| DM13330P3 | 0.33597475 | -1.1936109 | -1.1073699 | -1.0262074 |            |                |
| DM14411P1 | 0.33600456 | -1.083209  | -1.0856057 | 1.0847374  | AT2G05250  | NM_126550.1    |
| DM10394P4 | 0.3360391  | -1.1601882 | -1.1304907 | -1.1370031 |            |                |
| DM15291P4 | 0.3361026  | -1.1504494 | -1.1532733 | -1.3758476 |            |                |
| DM04596P2 | 0.33614954 | -1.1220393 | -1.021952  | 1.216367   |            |                |
| DM00514P2 | 0.33626783 | -1.1634877 | -1.0571063 | -1.1323175 | DWIL\GK241 | XM_002067115.1 |
| DM08469P2 | 0.3363071  | 1.296375   | 1.3745534  | 1.5812061  |            |                |
| DM04320P2 | 0.33635423 | -1.0296042 | 1.074281   | -1.0675796 | DYAK\GE217 | XM_002094282.1 |
| DM07464P1 | 0.33650437 | 1.0459998  | 1.1501899  | -1.0982475 |            |                |
| DM07356P1 | 0.33650503 | -1.0895177 | 1.0616205  | 1.3826482  |            |                |
| DM04524P3 | 0.33652964 | -1.0676237 | 1.0593027  | -1.1581872 | LOC1001242 | XM_001608105.1 |
| DM07086P1 | 0.33675405 | 1.0533834  | -1.1320696 | -1.0285188 |            |                |
| DM07953P3 | 0.33696765 | 1.0327854  | -1.0255877 | 1.034795   |            |                |
| DM06246P4 | 0.33699965 | 1.0089446  | 1.1564718  | 1.0884337  |            |                |
| DM12097P2 | 0.33703473 | -1.0248233 | 4.22506    | -1.1224139 |            |                |
| DM14309P1 | 0.33709124 | -1.2959836 | -1.1006534 | 1.0034499  |            |                |
| DM02144P3 | 0.33710477 | 1.2746849  | 1.2062297  | 1.2016284  | DGRI\GH217 | XM_001987043.1 |
| DM08499P2 | 0.33710626 | 1.2380402  | 1.4034774  | 1.2821916  |            |                |
| DM12813P2 | 0.33710968 | 1.1275316  | 1.1795626  | -1.4718715 |            |                |
| DM13885P3 | 0.33737245 | -1.2311357 | -1.0098411 | -1.1045331 |            |                |
| DM00536P2 | 0.33743173 | 1.0204455  | 1.0463022  | 1.0236998  | DGRI\GH140 | XM_001996061.1 |
| DM07153P1 | 0.3377784  | 1.1181188  | 1.1846212  | 1.0012207  |            |                |
| DM07766P2 | 0.33789203 | 1.1119692  | -1.0015944 | -1.0007268 |            |                |
| DM14791P1 | 0.33800638 | -1.0440542 | 1.3517447  | -1.0069604 |            |                |
| DM01162P1 | 0.3380808  | -1.1389674 | -1.1336967 | -1.0065609 | GMDS       | XM_418977.2    |
| DM07188P1 | 0.33827898 | 1.1594044  | 1.3613896  | 1.4074032  |            |                |
| DM08635P3 | 0.33835903 | 1.0929044  | 1.0470735  | 1.2465998  |            |                |
| DM00343P4 | 0.33848852 | 1.0707325  | -1.2227238 | 1.1749151  | DPER\GL119 | XM_002028445.1 |
| DM01993P3 | 0.33877206 | -1.0409185 | -1.3107855 | -1.0015441 | LOC661504  | XM_967659.2    |
| DM08262P1 | 0.33883122 | 1.051401   | 1.2329433  | -1.0086253 |            |                |
| DM12988P3 | 0.33887136 | -1.361447  | -1.0981209 | -1.169611  |            |                |
| DM05275P1 | 0.33900625 | -1.0152504 | 1.1117435  | 1.2590042  |            |                |
| DM08225P2 | 0.33919334 | -1.1693475 | -1.4075718 | -1.0501249 |            |                |
| DM03969P2 | 0.33919466 | 1.101898   | -1.0781684 | -1.1996443 |            |                |
| DM03244P3 | 0.33922154 | -1.047514  | -1.4226117 | -1.3097842 | DANA\GF214 | XM_001964270.1 |
| DM10209P3 | 0.33931488 | -1.023987  | 1.2415684  | -1.072135  |            |                |
| DM00821P2 | 0.3394189  | 1.0247203  | -1.082266  | 1.0492619  | DYAK\GE142 | XM_002092558.1 |
| DM11877P3 | 0.33945432 | 1.2910961  | -1.133797  | -1.1162608 |            |                |
| DM00208P2 | 0.339625   | -1.1800992 | -1.0762228 | -1.1437882 | BRAFLDRAFT | XM_002593842.1 |
| DM15326P3 | 0.339722   | 1.4193307  | 1.426521   | 2.2966282  |            |                |
| DM10249P1 | 0.33985552 | -1.18559   | -1.031268  | -1.0576669 |            |                |
| DM05378P4 | 0.33989856 | 1.071494   | 1.0255433  | 1.1663312  |            |                |
| DM12368P3 | 0.3399662  | -1.0058824 | -1.0068724 | -1.3993013 |            |                |
| DM09164P1 | 0.3400017  | -1.0966564 | -1.0846306 | -1.0939974 |            |                |
| DM13636P1 | 0.3400214  | -1.2444067 | -1.0955936 | -1.0362641 |            |                |
| DM09060P2 | 0.34020448 | -1.0522996 | -1.0313385 | -1.1813354 |            |                |
| DM06292P3 | 0.34035042 | 1.0006658  | -1.0115917 | 1.2162175  |            |                |

|           |            |            |            |            |            |                |
|-----------|------------|------------|------------|------------|------------|----------------|
| DM02300P3 | 0.34061322 | -1.0937833 | 1.0344123  | 1.1622837  | LOC663932  | XM_969960.2    |
| DM15267P1 | 0.34072277 | 1.0242813  | 1.0538497  | 1.2033814  |            |                |
| DM09955P4 | 0.340771   | 1.1357166  | 1.0560592  | -1.072786  |            |                |
| DM09131P1 | 0.34087944 | 1.1161177  | -1.4421196 | 1.1453348  |            |                |
| DM11842P3 | 0.34088832 | -1.573153  | -1.3443176 | -1.5514879 |            |                |
| DM06430P1 | 0.34101918 | -1.1855519 | -1.5015786 | -1.2991016 |            |                |
| DM11666P1 | 0.3410844  | -1.1319108 | -1.2975038 | -1.0728499 |            |                |
| DM01544P2 | 0.34119967 | 1.861349   | 2.2771938  | 1.1811329  | PXD        | NM_001170162.1 |
| DM08165P4 | 0.3412028  | -1.2507528 | 1.2531306  | -1.0480945 |            |                |
| DM01388P1 | 0.34120673 | 1.0601217  | -1.0822256 | -1.0265725 | LOC662500  | XM_968591.1    |
| DM10858P1 | 0.34120673 | 1.2390852  | -1.0215456 | 1.1353103  |            |                |
| DM03682P1 | 0.3412583  | -1.0077987 | -1.0049887 | 1.1465468  |            |                |
| DM11664P3 | 0.3414008  | 1.0662073  | 1.127436   | -1.0544746 |            |                |
| DM01397P2 | 0.3415786  | 1.0256381  | 1.0073944  | -1.1353623 |            |                |
| DM09355P1 | 0.34159806 | 1.3577715  | 1.0714386  | 1.4503804  |            |                |
| DM09938P2 | 0.3417326  | 1.2393364  | 1.1474946  | -1.0567296 |            |                |
| DM07314P2 | 0.3417354  | -1.203482  | -1.0863549 | 1.1404016  |            |                |
| DM09179P3 | 0.34176475 | 1.0684526  | -1.0735224 | 1.1457716  |            |                |
| DM04325P2 | 0.34186798 | -1.049661  | 1.1088893  | -1.0949264 | DPER\GL247 | XM_002022180.1 |
| DM10963P3 | 0.34189436 | -1.060481  | -1.0093935 | -1.1876948 |            |                |
| DM13444P1 | 0.34213474 | 1.0182701  | -1.188033  | 1.0620654  |            |                |
| DM06611P1 | 0.34224516 | -1.0138452 | -1.157543  | 1.1682695  |            |                |
| DM13733P1 | 0.34229368 | 1.0923232  | 1.3511295  | 1.0822288  |            |                |
| DM13622P1 | 0.3423328  | -1.0937259 | -1.0225937 | -1.1111435 |            |                |
| DM12447P3 | 0.34239936 | 1.115726   | -1.0226697 | 1.2028589  | TRPM4      | NM_175130.4    |
| DM06188P3 | 0.34242296 | 1.0755718  | 1.1050286  | 1.3170705  |            |                |
| DM04531P4 | 0.34245253 | 1.075888   | -1.0844043 | 1.0282434  |            |                |
| DM00876P2 | 0.34248093 | 1.0144613  | 1.1054271  | -1.0687925 | LOC578377  | XM_001190921.1 |
| DM07913P3 | 0.34249082 | -1.0415304 | 1.2467692  | 1.249038   |            |                |
| DM07909P2 | 0.34256762 | 1.7302974  | 1.0748082  | 1.7283573  | DYAK\GE254 | XM_002096055.1 |
| DM13658P1 | 0.342638   | 1.1081455  | 1.3136125  | 1.2340302  |            |                |
| DM03915P1 | 0.34265286 | -1.005092  | -1.8319122 | -1.0603473 |            |                |
| DM12200P2 | 0.34270558 | 1.5407046  | 1.5427011  | 1.7783045  |            |                |
| DM09117P4 | 0.34271318 | -1.0225438 | -1.2042438 | 1.0466598  |            |                |
| DM06891P1 | 0.3428348  | -1.0289247 | 1.1286126  | -1.0883425 |            |                |
| DM00258P3 | 0.34284604 | -1.0183666 | -1.1121895 | -1.036473  | LOC692975  | NM_001046814.1 |
| DM13570P1 | 0.3430773  | -1.2018446 | -1.1277604 | -1.1896484 |            |                |
| DM14440P3 | 0.34311697 | 1.1833789  | 1.2025219  | 1.4782599  |            |                |
| DM05165P3 | 0.34331498 | 1.1827563  | 1.2327611  | -1.0383141 |            |                |
| DM12150P3 | 0.34339172 | -1.1351469 | -1.0764645 | -1.0730282 |            |                |
| DM06225P2 | 0.34346652 | 1.0215793  | 1.0206928  | 1.102678   |            |                |
| DM09331P2 | 0.34352726 | -1.257298  | -1.1895995 | -1.2769738 |            |                |
| DM04774P3 | 0.34357378 | 1.1160798  | 1.1030436  | 1.1993464  |            |                |
| DM09317P2 | 0.34385806 | -1.1667604 | -1.2870742 | 1.1906168  |            |                |
| DM03949P2 | 0.34389085 | 1.1724942  | -1.1916074 | 1.1066028  |            |                |
| DM01586P1 | 0.34393376 | 1.0133488  | 1.0259986  | 1.0482055  | DGR1\GH200 | XM_001987269.1 |
| DM09229P2 | 0.343946   | 1.0490589  | 1.2570161  | 1.2669913  |            |                |
| DM03452P1 | 0.34412792 | -1.0175053 | -1.0254849 | -1.1210417 |            |                |
| DM03753P1 | 0.34417582 | 1.2012931  | 1.4748262  | -1.0074518 |            |                |
| DM07037P4 | 0.3441962  | 1.1429251  | 1.040174   | 1.0946507  |            |                |

|           |            |            |            |            |            |                |
|-----------|------------|------------|------------|------------|------------|----------------|
| DM11007P3 | 0.34423435 | -1.049242  | -1.5323257 | -1.1569334 |            |                |
| DM11816P3 | 0.34429798 | 1.196672   | 1.2732974  | 1.149056   |            |                |
| DM12829P1 | 0.34437177 | -1.0036418 | 1.1063782  | -1.0857872 |            |                |
| DM00449P4 | 0.34437358 | -1.4530569 | 1.0241867  | 1.0997691  | BRAFLDRAFT | XM_002596369.1 |
| DM00559P1 | 0.344697   | -1.0613272 | -1.0498799 | -1.1617409 | LOC732876  | NM_001046879.1 |
| DM12014P1 | 0.3447322  | 1.3671831  | -1.0794929 | 1.6268463  |            |                |
| DM10316P4 | 0.34474596 | -1.3449824 | -1.2303535 | -1.3487556 |            |                |
| DM06832P1 | 0.34474945 | 1.0193989  | -2.0161483 | 1.4442538  |            |                |
| DM14659P3 | 0.34481382 | 1.0783619  | 1.6563894  | 1.1107512  |            |                |
| DM07775P3 | 0.3448739  | -1.1991335 | 1.2670934  | 1.1230724  |            |                |
| DM02358P2 | 0.34488952 | -1.1061164 | -1.126697  | 1.063209   | LOC1001680 | NM_001136120.1 |
| DM10496P3 | 0.34497565 | 1.1208092  | 1.1889805  | 1.3652527  |            |                |
| DM10759P2 | 0.34500238 | -1.1283847 | -1.1384892 | -1.0224397 |            |                |
| DM14910P3 | 0.34506282 | 1.1199881  | -1.2876364 | 1.114217   |            |                |
| DM01456P4 | 0.3451658  | -1.002825  | -1.0151652 | 1.2006738  | LOC658026  | XM_964440.1    |
| DM12140P3 | 0.3453327  | 1.0148004  | -1.016447  | -1.1193396 |            |                |
| DM13855P2 | 0.3454349  | 1.0946337  | 1.2889477  | 1.1984819  |            |                |
| DM06497P1 | 0.34544602 | -1.0541152 | -1.1456354 | 1.2458333  |            |                |
| DM01450P1 | 0.3454497  | 1.0822974  | 1.1991351  | 1.5574772  | PRSS3      | XM_532744.2    |
| DM12672P3 | 0.34550735 | 1.0076646  | -1.1936148 | -1.2728121 |            |                |
| DM10355P3 | 0.34554243 | -1.0174032 | -1.1975639 | 1.0907938  |            |                |
| DM06333P2 | 0.34556204 | -1.2710099 | -1.4008731 | 1.0384688  | AGAP_AGAP0 | XM_308259.3    |
| DM02464P2 | 0.3456972  | 1.3685743  | 1.3622985  | 1.2814327  |            |                |
| DM08837P1 | 0.34571382 | -1.0706422 | 1.4539363  | 1.2301942  |            |                |
| DM12158P1 | 0.34589407 | 1.1784627  | 1.2530409  | 1.0138392  |            |                |
| DM10597P4 | 0.34605676 | 1.3259522  | 1.0553731  | 2.1219733  |            |                |
| DM12175P4 | 0.3461095  | 1.0965625  | -1.2119415 | 1.1878695  |            |                |
| DM13520P1 | 0.3461325  | -1.0189397 | 1.0272     | 1.0542866  |            |                |
| DM00251P1 | 0.34618306 | 1.1308494  | -1.5130957 | 1.1598499  | VERM       | NM_168809.2    |
| DM04978P3 | 0.34625766 | 1.134028   | 1.2593309  | 1.0967939  |            |                |
| DM06836P1 | 0.34632006 | -1.0622622 | -1.2396481 | -1.0470829 |            |                |
| DM07672P3 | 0.34638217 | 1.212524   | 1.4324253  | 1.3656877  |            |                |
| DM11641P1 | 0.34642145 | 1.0722816  | 1.0750788  | -1.0572125 |            |                |
| DM05690P1 | 0.34649608 | 1.025161   | 1.0531964  | -1.091858  | BRAFLDRAFT | XM_002597635.1 |
| DM04659P1 | 0.3466343  | 1.09634    | 1.3429037  | 1.4932175  |            |                |
| DM09110P2 | 0.34689274 | 1.2485136  | -1.1787447 | -1.1352481 |            |                |
| DM08777P1 | 0.34689376 | -1.2646244 | -1.5111749 | 1.0462965  |            |                |
| DM08851P1 | 0.3470691  | -1.1172603 | -1.8050321 | -1.1745617 |            |                |
| DM09784P3 | 0.34707662 | -1.1341159 | -1.0184131 | -1.0065352 |            |                |
| DM11207P1 | 0.3470863  | 1.0470091  | -1.0260305 | 1.2229812  |            |                |
| DM08526P1 | 0.34710565 | 1.0130187  | 1.0512129  | 1.043432   | RPL41      | NM_001135910.1 |
| DM15028P3 | 0.34710664 | -1.1110682 | 1.576771   | 1.0327681  |            |                |
| DM10216P2 | 0.34713498 | -1.1862098 | 1.0573194  | 1.0520899  |            |                |
| DM15069P3 | 0.34715417 | 1.004568   | 1.1722138  | 1.122879   |            |                |
| DM05662P1 | 0.34724423 | -1.1290269 | -1.289193  | -1.1128446 |            |                |
| DM11749P4 | 0.34735417 | 1.0777385  | 1.0043283  | -1.1207356 |            |                |
| DM11735P1 | 0.3473782  | -1.0524491 | -1.0952524 | -1.1643803 |            |                |
| DM02161P2 | 0.34740606 | -1.0573969 | -1.0090606 | -1.2521261 | NMO        | NM_168250.2    |
| DM08745P1 | 0.3474114  | 1.0726188  | 1.1367966  | -1.0352447 |            |                |
| DM15272P1 | 0.34741288 | -1.0670094 | 1.0229949  | -1.2543837 |            |                |

|           |            |            |            |            |             |                |
|-----------|------------|------------|------------|------------|-------------|----------------|
| DM14520P3 | 0.34749982 | -1.3999406 | -1.0799751 | -1.2347956 |             |                |
| DM10595P2 | 0.34761882 | 1.2874081  | 1.5350162  | -1.0830758 |             |                |
| DM09883P3 | 0.3476938  | -1.0088283 | 1.1242781  | 1.0395004  |             |                |
| DM04381P1 | 0.34769896 | 1.108076   | -1.5865189 | 1.3292722  |             |                |
| DM07405P1 | 0.34791505 | 1.1621419  | 1.389951   | 1.0357609  |             |                |
| DM11787P3 | 0.34793508 | 1.006026   | -1.0998495 | -1.0686824 |             |                |
| DM05243P3 | 0.3480988  | -1.4140441 | -1.0206218 | -1.0677559 | BE2         | NM_001130879.1 |
| DM11065P1 | 0.34826007 | -1.1289226 | -1.0910763 | -1.131798  |             |                |
| DM01526P2 | 0.3482609  | -1.0710455 | -1.1237454 | -1.0221833 | DPSE\GA140  | XM_001354290.2 |
| DM02192P1 | 0.348287   | -1.0358493 | -1.1165264 | -1.0895897 | DWIL\GK230  | XM_002074534.1 |
| DM01166P1 | 0.3483124  | -1.0170871 | -1.0405719 | -1.1228269 | AGAP_AGAP0  | XM_308148.3    |
| DM10174P1 | 0.34842324 | -1.0076967 | -1.0306295 | 1.1709063  |             |                |
| DM04631P2 | 0.3484358  | 1.0710984  | 1.011396   | -1.2230803 |             |                |
| DM06394P1 | 0.34856087 | -1.073104  | 1.0719272  | -1.0575131 | LOC1001621  | XM_001944329.1 |
| DM14392P1 | 0.34864217 | -1.1401395 | -1.1881044 | 1.1093125  |             |                |
| DM08320P1 | 0.3487462  | -1.1094972 | 1.0534693  | 1.14205    |             |                |
| DM06558P2 | 0.34879693 | -1.0111476 | 1.0216502  | 1.087297   |             |                |
| DM15153P2 | 0.34894103 | 1.1327662  | 1.5054544  | 1.2809772  |             |                |
| DM08567P2 | 0.34902892 | -1.0875621 | 1.0713917  | 1.0279303  |             |                |
| DM00647P3 | 0.34938812 | -1.1126534 | -1.109964  | -1.2000511 | DERE\GG121  | XM_001981610.1 |
| DM00930P1 | 0.34939182 | -1.0190347 | -1.1596808 | -1.1010464 | MTHFD2      | NM_001031360.1 |
| DM01035P2 | 0.3495614  | 1.0820185  | 1.0185323  | 1.1558945  |             |                |
| DM11017P1 | 0.34966263 | -1.0741665 | -1.0608132 | -1.3160287 |             |                |
| DM12376P1 | 0.3497733  | 1.0583285  | 1.150256   | 1.0277115  |             |                |
| DM00951P1 | 0.3498152  | -1.0221292 | 1.0479336  | 1.0399364  | AGXT        | XM_001864218.1 |
| DM00533P2 | 0.34983382 | 1.1218356  | -1.081458  | 1.0304028  |             |                |
| DM01180P1 | 0.34987372 | 1.0259556  | 1.0386083  | 1.1447556  | ZGC:153615  | NM_001077791.1 |
| DM08052P2 | 0.34993008 | -1.2280309 | -1.0936258 | -1.1916968 |             |                |
| DM08791P2 | 0.35001242 | -1.1598923 | -1.0501035 | 1.0469655  |             |                |
| DM08732P3 | 0.35016426 | 1.2284027  | 1.0389491  | 1.0742548  |             |                |
| DM09739P3 | 0.35033327 | -1.2557347 | 1.1654966  | -1.1869782 | MONBRDRAF   | XM_001750954.1 |
| DM03330P3 | 0.35046542 | -1.0500002 | -1.128954  | 1.1803137  | AGAP_AGAP0  | XM_316056.4    |
| DM04919P1 | 0.35048303 | 1.1229988  | 1.0072033  | -1.0425869 |             |                |
| DM08290P1 | 0.35055274 | -1.1381317 | 1.2600839  | 1.2809054  |             |                |
| DM00163P1 | 0.35057488 | 1.0938051  | -1.1074374 | -1.1101291 | LOC1001606  | XM_001945680.1 |
| DM02630P2 | 0.35060832 | -1.1444795 | -1.0510186 | -1.2120427 | HYPOXIA ASE | XM_001660884.1 |
| DM03649P3 | 0.3506602  | -1.1825818 | -1.2090555 | -1.1276795 | DMOJ\GI124  | XM_002007221.1 |
| DM11500P2 | 0.3509998  | -1.124884  | 1.1375171  | -1.1773534 |             |                |
| DM14354P4 | 0.35103106 | -1.2600359 | -1.3546002 | -1.0253205 |             |                |
| DM09984P1 | 0.35105428 | 1.0097855  | -1.1385629 | -1.2913555 | DYAK\GE188  | XM_002088895.1 |
| DM06276P1 | 0.3511511  | -1.1579118 | -1.0739832 | -1.1621995 |             |                |
| DM02754P2 | 0.3512902  | 1.0271914  | -1.0405202 | -1.0732317 | DWIL\GK129  | XM_002073854.1 |
| DM07654P3 | 0.3512949  | -1.1093937 | -1.1696916 | -1.2330642 |             |                |
| DM01513P3 | 0.35133055 | 1.0427445  | 1.0574744  | -1.2338957 | SNX         | XM_001847393.1 |
| DM08389P2 | 0.35134754 | -1.25265   | 1.2157481  | -1.2616959 |             |                |
| DM02109P1 | 0.35140187 | -1.1354812 | -1.0336949 | 1.0028322  |             |                |
| DM14588P1 | 0.35149997 | 1.0562383  | 1.4061073  | 1.1160636  |             |                |
| DM01999P1 | 0.3518578  | -1.221697  | -1.0741534 | -1.1914963 | BRAFLDRAFT  | XM_002609989.1 |
| DM14296P1 | 0.35200635 | 1.0929786  | 1.0579963  | 1.2498966  |             |                |
| DM15275P1 | 0.35207105 | 1.1783576  | -1.7364148 | 1.176791   |             |                |

|           |            |            |            |            |                            |
|-----------|------------|------------|------------|------------|----------------------------|
| DM01813P2 | 0.3523174  | -1.0336998 | -1.2616321 | 1.03258    | LOC1000782:XM_001509253.1  |
| DM15244P1 | 0.35246623 | -1.3065757 | -1.1112033 | -1.2379293 |                            |
| DM00299P3 | 0.35251933 | 1.0973234  | 1.0506765  | -1.2082803 | DVIR\GJ1737 XM_002052075.1 |
| DM12079P2 | 0.35279444 | -1.3885868 | -1.148695  | -1.0550354 |                            |
| DM05749P1 | 0.35285044 | -1.2548107 | -1.0137249 | 1.0107462  |                            |
| DM08564P3 | 0.35287675 | 1.2634276  | 1.2659043  | 1.4888434  | THAPSDRAFT.XM_002285900.1  |
| DM11491P1 | 0.35332987 | 1.1428747  | -1.0612726 | -1.1453285 |                            |
| DM04374P2 | 0.35361147 | -1.0390636 | -1.259965  | 1.0055901  | DGRI\GH244 XM_001992040.1  |
| DM07009P3 | 0.35363343 | -1.0901283 | -1.1537356 | 1.0117161  |                            |
| DM02737P1 | 0.35370225 | 1.0074677  | -1.0655323 | 1.1973987  | CPNE9 NM_001102990.1       |
| DM00295P2 | 0.35384575 | 1.0086194  | 1.1801025  | -1.4558514 | BM1_51650 XM_001901763.1   |
| DM03226P3 | 0.35396275 | 1.038412   | 1.0143696  | 1.251125   |                            |
| DM09724P1 | 0.35413104 | 1.0084494  | -1.1415405 | -1.2238507 |                            |
| DM05789P1 | 0.35418484 | -1.0666003 | 1.0379641  | -1.0535458 | ZGC:112255 NM_001020669.1  |
| DM14400P2 | 0.35425574 | -1.0389899 | 1.15134    | 1.0390255  |                            |
| DM03369P1 | 0.35427603 | -1.102204  | -1.0479333 | -1.0027357 | DANA\GF157 XM_001963026.1  |
| DM00985P2 | 0.35427654 | -1.1176758 | -1.1060482 | -1.1732365 | DMOJ\GI152 XM_002009325.1  |
| DM15187P1 | 0.3542769  | -1.0178162 | -1.0910848 | 1.3106067  |                            |
| DM13165P1 | 0.3544265  | -1.1297127 | -1.1638552 | 1.0435116  |                            |
| DM13485P1 | 0.35454196 | -1.2650673 | -1.0786937 | 1.020196   |                            |
| DM11267P3 | 0.35461697 | -1.2522013 | 1.31827    | -1.4527193 |                            |
| DM02304P1 | 0.3546703  | 1.0687577  | -1.0117979 | 1.1532304  | LOC658986 XM_961952.2      |
| DM03174P1 | 0.3547531  | -1.0200609 | 1.0197061  | -1.0542789 |                            |
| DM07481P3 | 0.3549903  | -1.2072883 | -1.3493116 | 1.0366797  |                            |
| DM01739P4 | 0.35555914 | 1.0174922  | 1.1209222  | -1.068576  | BRAFLDRAFT.XM_002606188.1  |
| DM04617P2 | 0.35557783 | 1.132579   | 1.0834529  | -1.040615  |                            |
| DM14972P1 | 0.35559988 | 1.0590378  | -1.1133808 | -1.1609362 |                            |
| DM06995P4 | 0.35568914 | 1.0041909  | -1.0063064 | 1.2849855  | DSEC\GM105 XM_002038503.1  |
| DM04146P2 | 0.355859   | 1.032749   | -1.1258348 | 1.0877719  |                            |
| DM04449P2 | 0.3559023  | 1.2011901  | 1.18364    | 1.0711628  |                            |
| DM12173P3 | 0.35593253 | -1.1133671 | -1.1171738 | -1.2018926 |                            |
| DM08363P1 | 0.35602167 | 1.0622735  | -1.0410637 | -1.2467607 |                            |
| DM08591P2 | 0.35602304 | -1.1021225 | 1.2586159  | 1.1449031  |                            |
| DM08206P2 | 0.35609606 | 1.8777021  | 1.478409   | 2.0480216  |                            |
| DM07799P3 | 0.35615277 | -1.1570388 | 1.3001846  | 1.0924151  |                            |
| DM00129P3 | 0.35626066 | 1.1009271  | 1.2402973  | 1.2606093  | ECR NM_001159357.1         |
| DM04117P2 | 0.356513   | -1.1322865 | -1.2469827 | 1.1899816  |                            |
| DM07762P1 | 0.35651708 | -1.1357957 | -1.1563227 | 1.1465548  |                            |
| DM00110P1 | 0.35657606 | 1.074107   | 1.14724    | 1.1406913  | DANA\GF138 XM_001961304.1  |
| DM11598P3 | 0.35669577 | -1.1493723 | -1.0694057 | 1.0533508  |                            |
| DM10483P2 | 0.3567313  | 1.0411371  | -1.3379495 | -1.1518745 |                            |
| DM06221P1 | 0.35674644 | 1.1147095  | 1.1024517  | 1.0303247  | AAEL_AAEL0C XM_001657520.1 |
| DM07231P2 | 0.35683027 | 1.0375065  | 1.0889504  | 1.6074351  |                            |
| DM00921P1 | 0.35692316 | 1.0937269  | 1.0127636  | -1.0492116 | STAT XM_964384.2           |
| DM12896P1 | 0.35700974 | -1.0406481 | -1.1402515 | 1.0371139  | LOC732990 NM_001046986.1   |
| DM11967P1 | 0.35702148 | 1.147367   | 1.1527822  | 1.0237541  |                            |
| DM07484P2 | 0.35703528 | 1.0958728  | 1.3725281  | 1.0183063  |                            |
| DM10793P2 | 0.3575179  | 1.1869196  | 1.1518303  | 1.0168155  |                            |
| DM14516P3 | 0.35755792 | -1.0215803 | 1.0158929  | 1.2038864  |                            |
| DM02571P2 | 0.35762605 | -4.1242375 | -4.0261693 | -4.284793  |                            |

|           |            |            |            |            |            |                 |
|-----------|------------|------------|------------|------------|------------|-----------------|
| DM03632P1 | 0.3576579  | -1.1319128 | -1.2260739 | 1.1274359  | LOC412735  | XM_396188.2     |
| DM08456P1 | 0.35773918 | 1.1215198  | -1.0022942 | 1.2008234  |            |                 |
| DM12600P4 | 0.35786718 | 1.1877648  | 1.1291931  | 1.3250096  |            |                 |
| DM12844P3 | 0.35799912 | 1.1660607  | 1.7811342  | 1.2769656  |            |                 |
| DM07580P1 | 0.3581014  | -1.0542603 | 1.0803685  | -1.0500596 |            |                 |
| DM10381P1 | 0.35820937 | -1.2309544 | 1.1126591  | -1.1370332 |            |                 |
| DM09556P1 | 0.35834703 | -1.0184662 | -1.0994115 | -1.2093214 |            |                 |
| DM12738P3 | 0.35842636 | 1.00658    | -1.0302707 | -1.161472  |            |                 |
| DM10468P1 | 0.35849223 | 1.0272069  | -1.0022421 | 1.0325404  |            |                 |
| DM02138P4 | 0.35858592 | 1.0302782  | -1.0109795 | 1.1436659  | LOC412313  | XM_395774.3     |
| DM05568P1 | 0.35871872 | 1.1470652  | 1.0124127  | 1.2833965  |            |                 |
| DM09953P3 | 0.35887292 | -1.1026626 | -1.3438655 | 1.0855358  |            |                 |
| DM00041P3 | 0.3589947  | -1.0355982 | -1.0034678 | -1.1527483 | LOC1002201 | (XM_002199283.1 |
| DM03166P3 | 0.3590579  | -1.1486856 | 1.0959072  | 1.0888777  |            |                 |
| DM14039P3 | 0.35912624 | 1.0268992  | 1.0841408  | 1.1464363  |            |                 |
| DM00330P2 | 0.35925525 | -1.0070324 | -1.0588428 | -1.1360348 | AGAP_AGAP0 | XM_315621.4     |
| DM08228P1 | 0.35935456 | -1.0661063 | -1.2250682 | -1.104215  |            |                 |
| DM06067P2 | 0.3594592  | -1.0835869 | 1.0287325  | 1.0841542  | RPS26      | NM_001126227.2  |
| DM02985P4 | 0.35947186 | -1.0312536 | -1.1727743 | 1.1600244  | LOC1002076 | XM_002170824.1  |
| DM15002P1 | 0.35956588 | -1.1264948 | -1.3444567 | 1.1590048  |            |                 |
| DM12732P2 | 0.3596403  | 1.331598   | 1.6870934  | 1.2109452  |            |                 |
| DM03344P3 | 0.35964918 | 1.0763881  | 1.0175908  | -1.063642  | LT         | NM_001042951.1  |
| DM01557P2 | 0.35969108 | -1.0161588 | -1.1437913 | 1.0804328  | MGC68518   | NM_001090004.1  |
| DM03300P2 | 0.35994226 | 1.0567654  | -1.0732203 | -1.1238437 |            |                 |
| DM05969P1 | 0.36013383 | -1.1434532 | 1.0423931  | 1.3327808  | DERE\GG153 | XM_001972049.1  |
| DM00766P3 | 0.36050427 | -1.1004022 | -1.0236226 | 1.038102   | LOC657402  | XM_963864.2     |
| DM08489P1 | 0.36063296 | -1.0269877 | -1.0281652 | 1.2746795  |            |                 |
| DM03154P4 | 0.36069432 | -1.0479203 | -1.0496178 | 1.2434596  | LOC1001851 | (XM_002124301.1 |
| DM01595P1 | 0.36083865 | -1.0069163 | -1.0976808 | -1.153098  | RPL10      | NM_001136122.1  |
| DM15308P1 | 0.36089078 | 1.0674801  | -1.0169954 | -1.1393082 |            |                 |
| DM01947P1 | 0.36092797 | -1.0437213 | -1.0145046 | 1.0034603  | LOC1001873 | (XM_002128730.1 |
| DM06856P3 | 0.36094326 | 1.058397   | 1.2292346  | 1.1065729  |            |                 |
| DM08444P2 | 0.36125252 | 1.07026    | -1.0889585 | -1.023619  |            |                 |
| DM08412P1 | 0.36132133 | -1.031121  | 1.2135704  | 1.1340375  | LOC726700  | XM_001122423.1  |
| DM02833P2 | 0.36150858 | 1.007871   | -1.0644598 | -1.1106123 |            |                 |
| DM04556P4 | 0.3616037  | -1.0056216 | -1.5696331 | 1.4074818  |            |                 |
| DM05294P1 | 0.36167032 | 4.1754127  | 1.1095469  | 1.0214057  |            |                 |
| DM00392P1 | 0.36171103 | -1.0327792 | -1.0137386 | -1.2126516 | LOC1000148 | (XM_001363870.1 |
| DM05401P2 | 0.36173972 | -1.0140469 | -2.1971252 | -1.0434202 |            |                 |
| DM01520P2 | 0.3617866  | 1.2623916  | 1.1966698  | 1.2403474  | TNNC       | XM_001652023.1  |
| DM14165P1 | 0.36178866 | -1.2110189 | -1.1021426 | -1.2147542 |            |                 |
| DM10488P1 | 0.36196923 | -1.1670245 | -1.0633664 | -1.2595586 |            |                 |
| DM04763P1 | 0.3620395  | -1.013826  | 1.048814   | -1.5164324 | OS07G05627 | NM_001066526.1  |
| DM05562P2 | 0.3622468  | -1.0511948 | -1.0967734 | -1.2246193 |            |                 |
| DM12035P3 | 0.3623687  | 1.263522   | -1.2188755 | 1.1449208  |            |                 |
| DM10807P1 | 0.36244437 | 1.0251429  | 1.0710803  | 1.3565696  |            |                 |
| DM02886P2 | 0.36245298 | 1.0554923  | -1.1427606 | 1.0526999  | LOC551157  | XM_623552.2     |
| DM08683P3 | 0.3625529  | -1.1005505 | -1.37981   | -1.1437575 |            |                 |
| DM06073P1 | 0.36261278 | 1.0065887  | -1.2134308 | 1.2831084  |            |                 |
| DM07114P2 | 0.36264238 | 1.7474756  | -2.019231  | 3.0632486  |            |                 |

|           |            |            |            |            |            |                |
|-----------|------------|------------|------------|------------|------------|----------------|
| DM09371P2 | 0.362662   | 1.1007135  | -1.3313732 | 1.2343253  |            |                |
| DM11397P1 | 0.36277196 | 1.2820419  | 1.0885885  | -1.0139402 |            |                |
| DM10325P3 | 0.36286178 | -1.619317  | -1.4899769 | -1.2471087 |            |                |
| DM11772P1 | 0.36286902 | 1.0533944  | -1.0103604 | 1.7084808  |            |                |
| DM02449P2 | 0.36291155 | -1.0376552 | -1.0415262 | -1.1160141 | LOC726088  | XM_001120202.1 |
| DM00031P2 | 0.3630448  | 1.1251556  | -1.060182  | -1.1021359 | TTC30      | NM_001102833.1 |
| DM11070P3 | 0.36316845 | 1.0231267  | -1.2981906 | -1.1292243 | LOC1001641 | XM_001947823.1 |
| DM02782P4 | 0.36318412 | -1.0733557 | -1.1240889 | -1.1358136 | NME1       | NM_205777.2    |
| DM04248P3 | 0.363207   | 1.0247757  | 1.1917901  | -1.0136201 |            |                |
| DM15335P2 | 0.363324   | 1.3112204  | 1.2031499  | 1.6007751  | LOC1002624 | XM_002271293.1 |
| DM10428P1 | 0.36341548 | 1.1170193  | 1.2180187  | 1.1449405  |            |                |
| DM04431P3 | 0.36365747 | 1.1087524  | 1.017643   | 1.0525577  |            |                |
| DM04885P2 | 0.36368057 | 1.0466353  | -1.0673349 | 1.0756016  |            |                |
| DM10437P3 | 0.36376557 | 1.6731169  | 1.5712321  | 1.2218146  |            |                |
| DM05829P4 | 0.36377472 | -1.0692499 | -1.2016417 | 1.0191617  | LOC663877  | XM_969907.2    |
| DM02504P3 | 0.36380833 | -1.0009699 | -1.1110327 | 1.056058   | DGRI\GH189 | XM_001989752.1 |
| DM07943P2 | 0.36384627 | 1.2288821  | 1.0439689  | 1.3482891  | LOC1001850 | XM_002125527.1 |
| DM14203P3 | 0.36390078 | -1.0305187 | -1.072926  | 1.0804057  | UBQLN3     | NM_001107543.2 |
| DM09980P4 | 0.36390442 | 1.1381973  | 1.1314149  | 1.202238   |            |                |
| DM01452P3 | 0.3639596  | -1.2844657 | -1.1200215 | -1.2552829 | EPHX1      | NM_001034090.1 |
| DM10731P2 | 0.36414507 | -1.116459  | -1.096579  | -1.0797471 |            |                |
| DM01297P2 | 0.36436462 | 1.1656287  | 1.094664   | -1.0362204 | LOC1002245 | XR_054500.1    |
| DM05428P2 | 0.3643831  | 1.0222616  | -1.1537067 | -1.0339448 |            |                |
| DM01828P2 | 0.36440536 | -1.1975816 | -1.2201068 | -1.0827469 | DANA\GF108 | XM_001958266.1 |
| DM02908P1 | 0.36486706 | -1.2970355 | -1.348593  | -1.4359286 |            |                |
| DM04825P4 | 0.3651706  | -1.0248927 | -1.289129  | -1.2041363 |            |                |
| DM07145P2 | 0.36532035 | 1.067278   | -1.0867757 | -1.0437115 |            |                |
| DM07547P1 | 0.36542413 | 1.2196317  | -1.4531635 | -1.225477  |            |                |
| DM13683P1 | 0.36542413 | -1.0514939 | -1.5431705 | 1.1801809  |            |                |
| DM15203P2 | 0.36549473 | -1.0405169 | 1.1553439  | -1.1041061 |            |                |
| DM09693P1 | 0.3655968  | 1.2237414  | 1.055651   | 1.1274909  |            |                |
| DM01170P2 | 0.36572817 | -1.0187833 | 1.0385838  | -1.1517313 | LOC1001227 | XM_001606271.1 |
| DM06460P1 | 0.36572835 | -1.1226304 | -1.0936134 | 1.0931756  |            |                |
| DM08329P1 | 0.36573803 | -1.0375168 | -1.618551  | 1.0271744  |            |                |
| DM13603P3 | 0.36573994 | -1.5378803 | -1.1454552 | -1.1310381 |            |                |
| DM15136P1 | 0.36576954 | -1.005595  | 1.1302838  | 1.341181   |            |                |
| DM06786P2 | 0.36593628 | 1.0337659  | 1.1936481  | 1.1501058  |            |                |
| DM05149P1 | 0.36593783 | 2.8484588  | -1.1042057 | -1.1665086 | BRAFLDRAFT | XM_002591764.1 |
| DM03852P1 | 0.36595464 | 1.1275716  | 1.2359883  | 1.1841173  | LOC663813  | XM_969848.1    |
| DM04197P3 | 0.36599773 | 1.0952928  | -1.1356928 | 1.1071277  |            |                |
| DM08740P1 | 0.36602703 | -1.1490166 | 1.3246747  | -1.0060837 |            |                |
| DM12314P1 | 0.36604762 | 1.0576571  | -1.0629671 | -1.1432841 |            |                |
| DM13808P1 | 0.3660653  | -1.1512485 | -1.1203154 | 1.0494975  |            |                |
| DM03155P1 | 0.36620855 | 1.0669147  | 1.0778402  | -1.7799041 |            |                |
| DM04150P3 | 0.36628532 | 1.2379726  | 1.0966562  | 1.1242915  |            |                |
| DM12116P1 | 0.36644545 | -1.1028956 | 1.096642   | -1.0858881 |            |                |
| DM01443P3 | 0.3665966  | -1.3239241 | -1.0868304 | -1.1189426 |            |                |
| DM10510P1 | 0.36663666 | -1.0533346 | -1.1507524 | 1.0213248  |            |                |
| DM08142P1 | 0.36667153 | 1.0681862  | 1.0373398  | 1.0852349  |            |                |
| DM04394P3 | 0.3667792  | 1.2311118  | 1.0832539  | 1.1684196  |            |                |



|           |            |            |            |            |             |                |
|-----------|------------|------------|------------|------------|-------------|----------------|
| DM03436P1 | 0.36678892 | 1.0996897  | -1.1507939 | -1.0706415 |             |                |
| DM00109P1 | 0.36683977 | -1.0300152 | 1.0176039  | -1.126664  | CSNK2A1     | NM_001002242.1 |
| DM01075P1 | 0.3668814  | 1.0018566  | -1.0722191 | -1.1243309 | AAEL_AAELOC | XM_001659432.1 |
| DM15302P2 | 0.36695808 | -1.014111  | 1.0818542  | -1.056334  |             |                |
| DM12739P1 | 0.3669886  | -1.0700362 | -1.0324339 | 1.4771616  |             |                |
| DM07087P1 | 0.36707103 | -1.8001274 | -1.1845742 | -1.13565   | CG17337     | NM_136337.2    |
| DM02965P1 | 0.36725417 | -1.1513914 | -1.1050671 | 1.0556706  | LOC10016386 | XM_001945402.1 |
| DM03702P3 | 0.36726734 | 1.1443368  | -1.2184678 | 1.1620417  | LOC10016886 | XM_001948427.1 |
| DM09316P1 | 0.36754972 | -1.2015837 | -1.3286597 | 1.1353629  |             |                |
| DM04050P3 | 0.36762458 | -1.0414293 | -1.346208  | -1.1044259 | AGAP_AGAP0  | XM_551775.3    |
| DM08465P1 | 0.3676279  | -1.1729916 | -1.185047  | -1.0726099 |             |                |
| DM05391P2 | 0.36778966 | -1.0863446 | -1.19461   | -1.3236572 |             |                |
| DM13328P3 | 0.36782894 | 1.3241299  | -1.1111987 | 1.2519623  |             |                |
| DM04566P1 | 0.36802486 | -1.1118097 | 1.1050586  | 1.2604086  | AIFM2       | NM_001097928.1 |
| DM01518P1 | 0.3681608  | 1.0852771  | 1.3123624  | 1.2942502  | DPER\GL124C | XM_002019412.1 |
| DM10083P1 | 0.36825734 | 1.0933336  | -1.1834584 | -1.4169207 |             |                |
| DM03763P4 | 0.36850926 | -1.0444126 | 1.0184516  | -1.1359054 |             |                |
| DM03991P1 | 0.36856148 | 1.0494785  | 1.0529151  | -1.2188486 |             |                |
| DM05496P3 | 0.36856776 | 1.2147161  | 1.0640911  | 1.126908   | DMOJ\GI121E | XM_002007758.1 |
| DM14257P1 | 0.36858097 | 1.0582205  | -1.2881482 | -1.0126289 |             |                |
| DM04687P1 | 0.36865252 | 1.0062597  | 1.2015021  | 1.0726538  |             |                |
| DM07434P3 | 0.3686793  | -1.2402735 | 1.107785   | 1.1171534  |             |                |
| DM08809P1 | 0.3687702  | 1.0358573  | 1.1106571  | -1.3045553 |             |                |
| DM01467P3 | 0.36893877 | -1.097294  | -1.0425082 | -1.1373425 | BZW2        | XM_532484.2    |
| DM07358P3 | 0.3689454  | 1.0450702  | 1.3794215  | -1.2945659 |             |                |
| DM13752P4 | 0.36898842 | -1.0811538 | 1.0487323  | 1.1928821  |             |                |
| DM10516P2 | 0.3690924  | 1.1858621  | 1.3334028  | 1.32155    |             |                |
| DM06936P1 | 0.3693125  | -1.0159664 | -1.5448711 | 1.108002   |             |                |
| DM11568P2 | 0.36950287 | 1.1746936  | 1.1081533  | -1.0815035 |             |                |
| DM12942P2 | 0.36953163 | -1.0549247 | -1.0255815 | 1.1920544  |             |                |
| DM00186P2 | 0.36954612 | -1.1206692 | -1.2004645 | -1.1562462 | LOC1001421C | XM_001814705.1 |
| DM05563P1 | 0.36961254 | -1.0251337 | 1.2176169  | -1.0729235 |             |                |
| DM07265P1 | 0.36967358 | 1.3241277  | 1.0374109  | 1.4005729  |             |                |
| DM02469P3 | 0.36968666 | 1.0544841  | 1.0408094  | -1.0565429 | AGAP_AGAP0  | XM_316499.4    |
| DM06803P4 | 0.36976567 | 1.2474146  | -2.6613452 | 1.4563746  |             |                |
| DM10800P1 | 0.3698571  | 1.1476634  | -1.1131175 | -1.289974  |             |                |
| DM08351P1 | 0.37009495 | -1.3188972 | -1.0341974 | 1.046772   |             |                |
| DM05990P1 | 0.37009618 | -1.2809858 | -1.1523983 | -1.0175157 | DYAK\GE205  | XM_002093787.1 |
| DM12972P1 | 0.37012988 | -1.0231662 | 1.0109205  | -1.2122427 |             |                |
| DM05752P3 | 0.37013337 | 1.0020984  | -1.5553275 | 2.4591708  |             |                |
| DM08163P2 | 0.37013966 | 1.1682824  | 1.1480793  | 1.2062602  |             |                |
| DM06322P1 | 0.37020233 | -1.1455932 | -1.0561305 | 1.0869224  | NEMVEDRAFT  | XM_001630079.1 |
| DM04950P2 | 0.37022117 | -1.1725764 | -1.0942214 | -1.1959723 | EB1         | NM_165487.3    |
| DM01219P3 | 0.3702259  | 1.0004771  | 1.1518114  | -1.0688423 |             |                |
| DM02685P3 | 0.37027478 | -1.0463855 | 1.0078956  | 1.0692631  |             |                |
| DM15264P3 | 0.37038445 | 1.2433684  | -1.0277712 | 1.0527757  |             |                |
| DM04405P2 | 0.37060788 | -1.1405519 | 1.0441164  | 1.0164442  |             |                |
| DM08997P2 | 0.37075692 | -1.1268755 | 1.167445   | -1.0017254 |             |                |
| DM15233P3 | 0.37096933 | -1.2094662 | -1.1935351 | 1.0398877  |             |                |
| DM12209P2 | 0.37097022 | -1.0963247 | -1.6917696 | -1.1297413 |             |                |

|           |            |            |            |            |                            |
|-----------|------------|------------|------------|------------|----------------------------|
| DM08649P1 | 0.37097055 | 1.0246102  | 1.0085297  | -1.109266  |                            |
| DM13767P3 | 0.37099573 | -1.0311545 | 1.0664201  | -1.0487821 |                            |
| DM05644P3 | 0.37104696 | 1.5560939  | 1.6510147  | 1.6045455  |                            |
| DM14542P3 | 0.3711297  | 1.2524334  | -1.155819  | 1.1266419  |                            |
| DM05144P3 | 0.37113285 | 1.1653286  | 1.0770304  | 1.0996743  |                            |
| DM11740P3 | 0.37118495 | -1.4597918 | -1.9123902 | 1.3153883  |                            |
| DM14434P2 | 0.37119702 | -1.0142965 | 1.1817986  | 1.1569097  |                            |
| DM00721P3 | 0.3712021  | -1.022299  | -1.2224959 | -1.1473794 | LOC1001597(XR_045801.1     |
| DM14495P1 | 0.3712306  | -1.1407771 | 1.0728378  | 1.1568549  | DSEC\GM112 XM_002044331.1  |
| DM06493P4 | 0.37123096 | -1.1789846 | -1.0462873 | 1.060771   |                            |
| DM04292P3 | 0.37124303 | -1.0690571 | 1.0060093  | -1.1429842 |                            |
| DM11043P3 | 0.3713837  | 1.0959295  | 1.2144353  | 1.0325176  | LOC727288 XM_001122997.1   |
| DM11719P2 | 0.3715554  | 1.0584402  | 1.0839343  | 1.0257517  | LOC659178 XM_965505.2      |
| DM05025P1 | 0.3716515  | 1.1905861  | 1.1377097  | 1.0796748  | GBETA5 XM_392638.3         |
| DM00521P3 | 0.37165815 | 1.0070537  | 1.0009346  | -1.1290448 | DMOJ\GI171 XM_002001984.1  |
| DM09573P3 | 0.37170225 | -1.1620849 | -1.0125768 | -1.1827002 |                            |
| DM04904P2 | 0.37175533 | 1.183313   | -1.1114833 | 1.0349628  |                            |
| DM14271P2 | 0.37189963 | -1.3224851 | -1.0897702 | -1.0561118 |                            |
| DM04136P3 | 0.3722653  | 1.1221024  | -1.0351453 | -1.0313765 |                            |
| DM06777P4 | 0.37227285 | 1.0147164  | -1.0376421 | -1.1722374 |                            |
| DM12641P2 | 0.37228984 | 1.1067427  | -1.4615659 | -1.1873819 |                            |
| DM10754P1 | 0.37236628 | 1.1814622  | 1.2782145  | 1.0214849  |                            |
| DM06505P3 | 0.3724159  | 1.4872361  | -1.8314148 | 1.7130735  |                            |
| DM01674P2 | 0.37247235 | -1.0535594 | -1.0667968 | -1.264269  | DPER\GL162 XM_002027798.1  |
| DM08537P3 | 0.37259546 | 1.1505818  | 1.0726558  | -1.1146322 |                            |
| DM13024P2 | 0.37264824 | -1.0627599 | -1.0009608 | -1.1075723 |                            |
| DM02628P1 | 0.37268877 | -1.0662338 | -1.0521964 | 1.1643374  | AGAP_AGAP0 XM_316486.4     |
| DM10453P3 | 0.3727763  | 1.0310327  | -1.3463961 | -1.2748499 |                            |
| DM09160P1 | 0.37283176 | 1.0157489  | 1.1916099  | 1.0122058  |                            |
| DM14300P3 | 0.3728579  | 1.5220269  | 1.1166679  | 1.19965    |                            |
| DM13929P3 | 0.3729028  | 1.2507339  | 1.4541987  | 1.502789   |                            |
| DM01749P1 | 0.37297758 | -1.0038186 | 1.0504023  | 1.0555751  | RPL27A NM_001130329.1      |
| DM10883P2 | 0.37318736 | 1.005201   | -1.0785956 | 1.0513328  |                            |
| DM06124P2 | 0.37319648 | 1.1144842  | 1.0367688  | 1.2856163  |                            |
| DM10464P1 | 0.37321404 | -1.1551847 | 1.0090855  | -1.1770973 |                            |
| DM10648P1 | 0.37328008 | 1.2062286  | -1.050526  | -1.0984226 | BRAFLDRAFT XM_002591844.1  |
| DM02594P4 | 0.37342516 | -1.1217821 | -1.0549356 | -1.0448259 | LOC476118 XM_533325.2      |
| DM04684P2 | 0.37346205 | 1.1422826  | 1.6010654  | 1.0147343  |                            |
| DM13500P1 | 0.37351546 | 1.0028216  | 1.0172881  | -1.1277905 |                            |
| DM00867P4 | 0.37373123 | -1.0367221 | -1.0248171 | -1.1484199 | DGRI\GH101: XM_001989266.1 |
| DM00590P1 | 0.37386447 | 1.4157975  | 1.7584002  | 1.4183377  | AGAP_AGAP0 XM_308537.4     |
| DM03126P4 | 0.37393463 | -1.10689   | -1.0881021 | -1.144988  | AT3G02190 NM_111086.2      |
| DM06534P4 | 0.37400654 | -1.1218507 | -1.0165693 | 1.0825604  |                            |
| DM01361P3 | 0.37408304 | 1.2546753  | 1.2980173  | 1.1014848  |                            |
| DM08354P2 | 0.37413844 | -1.1886637 | -1.0322415 | 1.0732313  |                            |
| DM03278P2 | 0.37426177 | -1.0300883 | -1.0876509 | 1.1340331  |                            |
| DM05705P4 | 0.37426952 | 1.0951748  | -1.2066165 | -1.1470535 |                            |
| DM04685P2 | 0.37432405 | 1.0809478  | 1.2030238  | 1.1328827  |                            |
| DM06706P2 | 0.37436876 | -1.2673428 | -1.1056625 | -1.2639998 |                            |
| DM05013P2 | 0.37443158 | 1.0793447  | -1.9495751 | 1.2191474  |                            |

|           |            |            |            |            |                           |
|-----------|------------|------------|------------|------------|---------------------------|
| DM08042P1 | 0.37453243 | 1.4767867  | 1.575736   | 1.3024775  |                           |
| DM05951P1 | 0.3746157  | -1.1519336 | -1.2343392 | -1.131368  | LOC1002273:XM_002186713.1 |
| DM05991P4 | 0.3746606  | 1.0551977  | 1.17593    | 1.1767192  | LOC1002120:XM_002154425.1 |
| DM13729P1 | 0.3747395  | -1.0438223 | 1.2550666  | -1.2027482 | PHYPADRAFT.XM_001753484.1 |
| DM14987P1 | 0.37500423 | 1.0081946  | -1.0581653 | 1.0956067  |                           |
| DM09010P4 | 0.37511665 | -1.1585774 | -1.6788504 | 1.0436794  |                           |
| DM08818P2 | 0.3751408  | -1.2793126 | -1.2578259 | -1.2529459 |                           |
| DM01786P3 | 0.37517443 | 1.1721929  | 1.0018059  | 1.143874   | LOC1001666:XM_001946394.1 |
| DM05963P1 | 0.3753613  | 1.0092106  | 1.1629384  | -1.2146789 |                           |
| DM02243P1 | 0.37551382 | -1.1544008 | 1.0168169  | 1.0728167  | LOC1000148:XM_001365791.1 |
| DM08605P3 | 0.3755678  | -1.157159  | -1.0449998 | 1.0052377  |                           |
| DM02662P1 | 0.3756124  | 1.0495956  | 1.0373513  | 1.0240937  | DPER\GL137:XM_002020012.1 |
| DM06369P1 | 0.37563145 | -1.1660336 | -1.7366178 | 1.1318955  | AGAP_AGAP0 XM_308259.3    |
| DM01589P2 | 0.3756879  | 1.0291203  | -1.0001042 | 1.2041681  | ATP1A XM_001662167.1      |
| DM02674P1 | 0.37576166 | 1.0927752  | 1.1467766  | 1.1215321  | PTP4A1 NM_001160349.1     |
| DM01296P3 | 0.37580293 | 1.0375513  | 1.0936393  | -1.1619004 |                           |
| DM05706P1 | 0.37582394 | 1.0870005  | -1.1185889 | 1.0827932  |                           |
| DM07093P3 | 0.3758488  | -1.1219296 | 1.1941799  | 1.3434068  |                           |
| DM11814P4 | 0.37586612 | 1.0354557  | -1.0859236 | 1.160751   |                           |
| DM14217P3 | 0.375915   | 1.1201047  | 1.1239791  | -1.0311317 |                           |
| DM10904P1 | 0.3759418  | -1.1712339 | -1.1290725 | -1.354491  |                           |
| DM07788P2 | 0.37617978 | -1.1692472 | -1.1493344 | -1.0761199 |                           |
| DM09379P3 | 0.37630606 | 1.185731   | 1.0869961  | 1.0569186  |                           |
| DM14297P3 | 0.37636644 | -1.21228   | -1.0077384 | 1.1457752  |                           |
| DM02066P3 | 0.3764348  | 1.0449016  | 1.0825243  | 1.2823747  | DANA\GF239:XM_001957565.1 |
| DM04505P3 | 0.3764862  | 1.0937718  | -1.6986575 | 1.0365049  |                           |
| DM06717P1 | 0.37651855 | -1.0251865 | 1.2194489  | 1.075789   |                           |
| DM06806P3 | 0.37655264 | -1.0500866 | -1.0061847 | 1.186485   |                           |
| DM15009P4 | 0.3766053  | 1.0163418  | 1.2784873  | 1.2185478  |                           |
| DM06481P1 | 0.37665796 | 1.0397071  | -1.4098123 | -1.2758923 |                           |
| DM10937P1 | 0.37671718 | 1.0695959  | -1.0695426 | -1.0976043 |                           |
| DM04308P4 | 0.3767223  | -1.0281769 | 1.3490778  | 1.4766363  | AT1G63510 NR_022362.1     |
| DM07965P1 | 0.37682942 | 1.0006777  | -1.0438929 | 1.082188   |                           |
| DM08722P1 | 0.37697372 | 1.3426389  | -1.3258073 | 1.0039353  |                           |
| DM14318P1 | 0.3769806  | 1.0640252  | 1.3651352  | 1.2823508  |                           |
| DM00692P4 | 0.37699777 | -1.0396587 | -1.0923405 | 1.0069274  | LOC1001233:XM_001606887.1 |
| DM09017P2 | 0.37715214 | -1.052459  | -1.0242903 | -1.2294389 |                           |
| DM09093P1 | 0.377322   | -1.0191473 | 1.2098312  | 1.0749655  |                           |
| DM03824P1 | 0.37738696 | -1.0902992 | -1.0074729 | -1.0166725 |                           |
| DM14445P1 | 0.37740746 | 1.0545174  | 1.1102332  | 1.2308542  |                           |
| DM09786P1 | 0.37765405 | -1.0240585 | 1.3807291  | -1.0115592 |                           |
| DM07743P2 | 0.3776645  | 1.1737833  | -1.2008237 | -1.1818992 |                           |
| DM08362P4 | 0.3776893  | 1.0115693  | 1.2215381  | 1.4639876  |                           |
| DM09636P1 | 0.3777814  | -1.0748382 | 1.1327887  | 1.1634812  |                           |
| DM05736P3 | 0.37784585 | -1.198645  | -1.1114984 | 1.1231196  |                           |
| DM10058P1 | 0.37789455 | -1.0983462 | -1.551643  | -1.09911   |                           |
| DM10031P3 | 0.37789652 | -1.3130233 | -1.1726717 | -1.1818327 |                           |
| DM11712P1 | 0.37796417 | 1.0311501  | -1.0008464 | -1.1214943 |                           |
| DM07873P1 | 0.37803647 | -1.0377419 | 1.12083    | 1.2195343  |                           |
| DM08887P1 | 0.3780565  | -1.1321665 | -1.1304381 | 1.1014885  |                           |

|           |            |            |            |            |             |                |
|-----------|------------|------------|------------|------------|-------------|----------------|
| DM05704P1 | 0.37806234 | 1.0091429  | -1.103856  | -1.0895941 | LOC732912   | NM_001046913.1 |
| DM02967P3 | 0.37812737 | 1.1799629  | 1.0120428  | -1.4240228 | LOC409367   | XM_392882.3    |
| DM07690P1 | 0.37828457 | 1.0347891  | 1.1184021  | 1.0507929  |             |                |
| DM07908P2 | 0.37835246 | 1.2457993  | 1.6456411  | -1.1779305 | HNRNP       | XM_001664035.1 |
| DM01487P3 | 0.37849203 | 1.1998456  | 1.32642    | 1.1034185  |             |                |
| DM12749P1 | 0.37858886 | -1.1651745 | -1.1547464 | -1.1607665 |             |                |
| DM05058P4 | 0.37864792 | -1.0377927 | -1.1216453 | -1.024802  | EHI_008200  | XM_645264.2    |
| DM06839P3 | 0.37866157 | -1.0387177 | -1.4064083 | 1.0060139  |             |                |
| DM00926P4 | 0.37871692 | -1.2446073 | 1.1425811  | 1.1412722  | POLR3A      | NM_001083750.1 |
| DM12881P1 | 0.37905446 | -1.1537526 | -1.0190935 | -1.1429578 |             |                |
| DM11859P3 | 0.37906653 | 1.2685558  | 1.1077809  | 1.1218705  |             |                |
| DM03916P2 | 0.37906724 | 1.327435   | 1.2050649  | -1.0743456 | CNBL2940    | XM_767335.1    |
| DM10571P3 | 0.3791544  | 1.2401154  | 1.4998814  | 1.1980546  |             |                |
| DM08941P1 | 0.37928954 | 1.0951494  | 1.0180414  | -1.0483733 |             |                |
| DM12712P2 | 0.37937072 | 1.0000683  | 1.0254271  | -1.0777352 |             |                |
| DM01745P1 | 0.37945935 | 1.1050084  | 1.074353   | 1.2016822  | ECR         | NM_001159355.1 |
| DM01288P4 | 0.3795759  | -1.4671385 | -1.0836222 | -1.4774276 |             |                |
| DM00961P3 | 0.3796079  | 1.0105294  | -1.1844503 | -1.0021386 |             |                |
| DM12911P1 | 0.3796644  | 1.1780683  | 1.3529663  | 1.3503537  |             |                |
| DM12233P2 | 0.37974313 | -1.0976359 | -1.1720647 | -1.1002471 |             |                |
| DM14215P1 | 0.3798594  | 1.1233212  | 1.3213573  | 1.042372   |             |                |
| DM08005P1 | 0.37992322 | -1.0389495 | 1.0715734  | 1.2291685  |             |                |
| DM09857P1 | 0.38008022 | 1.485298   | 1.0636146  | 1.428062   |             |                |
| DM13026P2 | 0.38009143 | -1.180109  | -1.0843759 | 1.0299718  |             |                |
| DM13217P1 | 0.38034618 | -1.174503  | -1.0661188 | 1.0704061  |             |                |
| DM09585P3 | 0.3803809  | -1.1427459 | 1.1243343  | -1.1246117 |             |                |
| DM07004P2 | 0.3805418  | 1.2204778  | 1.1575735  | 1.1710488  |             |                |
| DM07115P2 | 0.3808185  | -1.027656  | -1.2433888 | 1.3073221  | DVIR\GJ1552 | XM_002051370.1 |
| DM02270P1 | 0.3808851  | 1.0156682  | -1.1679794 | 1.0184793  | VINC        | XR_014976.1    |
| DM14811P3 | 0.3810087  | 1.0194268  | 1.1432986  | 1.1859864  |             |                |
| DM15259P1 | 0.3810203  | -1.1134751 | 1.1230545  | 1.226028   |             |                |
| DM11874P3 | 0.38111722 | 1.2278929  | 1.1439937  | -1.0025756 |             |                |
| DM08289P2 | 0.38112026 | -1.1185538 | -1.0712122 | -1.1139734 |             |                |
| DM13928P3 | 0.3812653  | -1.0329124 | 1.0179284  | 1.2580136  |             |                |
| DM12228P1 | 0.38133663 | 1.2196251  | 1.4244463  | 1.4454215  |             |                |
| DM12234P1 | 0.38143986 | -1.1421968 | 1.07554    | 1.3977872  |             |                |
| DM00992P1 | 0.38148034 | -1.0030663 | -1.2634596 | 1.4047836  | LOC410819   | XM_394295.3    |
| DM11673P1 | 0.3816371  | 1.0750393  | -1.1249849 | -1.0483526 |             |                |
| DM14765P3 | 0.38165653 | -1.119653  | 1.4606524  | -1.0233996 | AT5G09345   | NR_023116.1    |
| DM12477P3 | 0.3817905  | 1.005938   | -1.1328945 | 1.052061   |             |                |
| DM05747P2 | 0.38182297 | 1.1034781  | 1.0064383  | 1.0930442  | GMPS        | NM_001006556.1 |
| DM06488P1 | 0.3820464  | -1.0804348 | -1.1232473 | 1.1391541  | BRAFLDRAFT  | XM_002587081.1 |
| DM12414P1 | 0.38216245 | 1.4474719  | 2.1073127  | 1.0586265  | COL-101     | NM_067504.4    |
| DM06938P3 | 0.38229743 | -1.0269185 | 1.0995312  | 1.3633461  |             |                |
| DM05103P1 | 0.38238388 | -1.1362623 | 1.006425   | 1.1156747  |             |                |
| DM09114P2 | 0.38245997 | -1.0665172 | -1.0588315 | -1.2828763 |             |                |
| DM09108P1 | 0.38267294 | 1.0102178  | 1.2044892  | 1.0739983  |             |                |
| DM09127P3 | 0.38271528 | 1.0507443  | 1.3167495  | 5.315485   |             |                |
| DM06988P1 | 0.38283986 | 2.1159809  | 2.6624465  | 1.4061956  |             |                |
| DM08128P2 | 0.3828987  | -1.0925469 | 1.0457624  | 1.1260316  |             |                |

|           |            |            |            |            |              |                |
|-----------|------------|------------|------------|------------|--------------|----------------|
| DM04066P2 | 0.38297808 | 1.18334    | -1.0458219 | 1.1328213  |              |                |
| DM03689P1 | 0.38307267 | -1.0250912 | -1.0056521 | 1.236131   | LOC661085    | XM_967270.2    |
| DM02741P2 | 0.38312757 | -1.1852221 | -1.1249006 | -1.2578095 |              |                |
| DM14380P2 | 0.38316566 | 1.0213441  | -1.2203977 | -1.0156245 |              |                |
| DM09789P1 | 0.3831889  | -1.0988647 | 1.0277402  | 1.0908786  |              |                |
| DM11172P3 | 0.38325313 | -1.0134646 | -1.183147  | -1.1036193 |              |                |
| DM12885P2 | 0.3832909  | -1.2013618 | -1.1237257 | -1.3603429 |              |                |
| DM00215P3 | 0.3834292  | 1.0532271  | 1.169265   | 1.0478241  | DRG1         | NM_004147.3    |
| DM10614P3 | 0.38349774 | 1.2402251  | 1.6043961  | -1.1728333 |              |                |
| DM05237P1 | 0.38352278 | -1.1566111 | -1.5496541 | -1.1361649 |              |                |
| DM01335P3 | 0.383572   | -1.1113381 | -1.0240595 | -1.1612968 | DWIL\GK210   | XM_002069198.1 |
| DM12449P2 | 0.38360906 | 1.0627061  | -1.1140137 | -1.0625205 |              |                |
| DM10403P2 | 0.38372704 | 1.0567554  | 1.0151775  | -1.0115807 |              |                |
| DM11021P3 | 0.38380045 | -1.1545767 | -1.1008804 | 1.1148545  | DYAK\GE165   | XM_002099776.1 |
| DM01753P3 | 0.38382983 | -1.0026573 | 1.0104102  | 1.1259661  | LOC1000104   | XM_001362420.1 |
| DM00913P1 | 0.38388032 | 1.1148235  | -1.3361096 | 1.0141488  | NEP-L        | NM_001043494.1 |
| DM10129P2 | 0.3841469  | -1.2677199 | -1.1210129 | -1.3289602 |              |                |
| DM07020P3 | 0.38416266 | 1.0613844  | 1.1622574  | -1.6274283 | CP3          | XM_001949845.1 |
| DM04139P1 | 0.38420978 | 1.0245912  | -1.8090153 | 1.1029897  |              |                |
| DM01772P1 | 0.38427395 | -1.0016731 | -1.007866  | 1.0282108  | LOC1002314   | XM_002187560.1 |
| DM11448P1 | 0.38438973 | -1.082606  | -1.0755169 | -1.2276481 |              |                |
| DM05974P1 | 0.38448223 | -1.2353851 | -1.0503821 | -1.0304962 | DANA\GF224   | XM_001965390.1 |
| DM00561P1 | 0.38449353 | 1.0749801  | -1.3295205 | -1.1209533 | LOC1002429   | XM_002266073.1 |
| DM10966P1 | 0.38449532 | 1.0087614  | 1.0671057  | -1.0642358 |              |                |
| DM04147P2 | 0.38456634 | -1.1030011 | -1.1560858 | -1.1444123 |              |                |
| DM11770P3 | 0.38463432 | 1.1367894  | -1.0937345 | 1.2015334  |              |                |
| DM14525P1 | 0.38475162 | -1.3433232 | -1.7342819 | 1.3083733  |              |                |
| DM11307P3 | 0.38481063 | 1.1113546  | 1.0389688  | 1.1025962  | CPIPJ_CPIJ01 | XM_001868780.1 |
| DM10099P3 | 0.38493064 | 1.2922285  | 1.3608692  | 1.3611052  |              |                |
| DM08849P1 | 0.38498843 | -1.0146183 | 1.0067053  | -1.2221622 |              |                |
| DM04360P3 | 0.38503867 | -1.0322423 | 1.0100485  | 1.1331341  |              |                |
| DM00296P1 | 0.3850769  | -1.2989272 | -1.2298062 | -1.1880546 | DMOJ\GI130   | XM_002007588.1 |
| DM11389P4 | 0.3850886  | -1.0844207 | 1.0816174  | -1.0306245 |              |                |
| DM06302P4 | 0.38514352 | -1.0989599 | 1.0401107  | -1.1068904 | LOC1002662   | XM_002283913.1 |
| DM03669P1 | 0.38516182 | -1.0533186 | 1.1426451  | 1.2174659  | DPSE\GA100   | XM_001357982.2 |
| DM00751P2 | 0.38522735 | -1.1550112 | -1.1367236 | -1.1306883 | LOC1001902   | XM_002194435.1 |
| DM00554P1 | 0.3852403  | -1.0491579 | 1.0252182  | -1.075726  | LOC1000180   | XM_001366957.1 |
| DM11795P3 | 0.38528067 | 1.1519662  | -1.0230818 | -1.0088747 |              |                |
| DM03789P1 | 0.38534603 | 1.2133064  | 1.1231891  | 1.2964777  |              |                |
| DM14414P1 | 0.38534674 | -1.1290603 | -1.051594  | 1.0862257  |              |                |
| DM05161P1 | 0.3853647  | -1.0215105 | -1.0812215 | 1.0444918  | LOC1000622   | XM_001493894.2 |
| DM09894P3 | 0.38546222 | -1.0375216 | 1.3590696  | 1.1084753  |              |                |
| DM03058P3 | 0.38562408 | 1.1185851  | 1.0094303  | -1.1035545 | HTATIP2      | NM_001098522.1 |
| DM01653P3 | 0.3859019  | 1.0278102  | 1.0775735  | 1.1240747  | DANA\GF239   | XM_001957596.1 |
| DM08092P2 | 0.38597453 | -1.1034771 | 1.0981612  | 1.0774202  |              |                |
| DM08629P4 | 0.38599414 | 1.3656548  | 1.4211662  | -1.0526791 |              |                |
| DM14007P2 | 0.3862599  | -1.0869874 | 1.0819472  | -1.3446151 |              |                |
| DM02288P1 | 0.38634825 | -1.0611134 | -1.074466  | 1.0419573  |              |                |
| DM07631P1 | 0.3866797  | 1.0103875  | -1.1392632 | -1.0167363 |              |                |
| DM12559P2 | 0.3868592  | -1.2140187 | -1.7725952 | -1.0272567 |              |                |

|           |            |            |            |            |            |                |
|-----------|------------|------------|------------|------------|------------|----------------|
| DM10765P2 | 0.38700038 | 1.1336182  | 1.3202755  | 1.0220966  |            |                |
| DM10171P1 | 0.38703677 | -1.2916765 | 1.1627548  | -1.0331389 |            |                |
| DM13224P1 | 0.38703677 | 1.2330917  | 1.2867013  | -1.0698586 |            |                |
| DM06515P3 | 0.3870719  | 1.0206143  | 1.5746609  | -1.2645835 |            |                |
| DM06260P2 | 0.38721836 | 1.0219276  | 1.2059481  | -1.0061021 |            |                |
| DM05182P2 | 0.38737336 | 1.1206049  | -1.0393997 | -1.0709494 |            |                |
| DM12466P2 | 0.38737515 | 1.1516604  | -1.1895072 | -1.3744687 |            |                |
| DM12634P1 | 0.38738433 | 1.6716834  | 2.407855   | -1.0084785 | COL-101    | NM_067504.4    |
| DM00066P1 | 0.38739228 | -1.0267439 | -1.0288596 | -1.092781  | LOC1000676 | XM_001504717.2 |
| DM11076P1 | 0.3878239  | 1.13025    | 1.2427521  | -1.0600288 |            |                |
| DM06793P2 | 0.38806695 | -1.0753955 | 1.0186307  | -1.1230668 |            |                |
| DM05577P2 | 0.38822576 | -1.0498874 | -1.2883765 | -1.334324  |            |                |
| DM13208P3 | 0.38831332 | -1.0862736 | 1.2219869  | -1.2170289 |            |                |
| DM02295P1 | 0.3884314  | -1.1365919 | 1.1168809  | 1.106712   | LOC1000165 | XM_001366558.1 |
| DM13448P1 | 0.38846028 | -1.0988519 | 1.3959802  | 1.0514358  |            |                |
| DM03480P1 | 0.38853252 | -1.1014203 | 1.1036556  | 1.089858   | LOC1000680 | XM_001497904.2 |
| DM13786P1 | 0.38859537 | 1.0421427  | 1.428945   | 1.4170845  |            |                |
| DM09268P1 | 0.38878977 | -1.1116533 | -1.5377201 | -1.3919029 |            |                |
| DM12042P2 | 0.3888064  | 1.1040944  | 1.2110822  | 1.0929081  |            |                |
| DM06676P2 | 0.3888447  | 1.1291893  | -1.0785961 | -1.0041502 |            |                |
| DM07993P1 | 0.3889636  | -1.0148802 | -1.008857  | -1.0940306 |            |                |
| DM03858P2 | 0.3889768  | 1.042481   | 1.1046828  | -1.07609   | BRAFLDRAFT | XM_002586218.1 |
| DM09308P2 | 0.38904244 | 1.4920517  | -1.9505839 | 1.659389   |            |                |
| DM01871P3 | 0.38914096 | -1.0889592 | -1.0412263 | -1.0829139 | DSEC\GM113 | XM_002041753.1 |
| DM05377P3 | 0.38942236 | 1.0893774  | 1.0532144  | -1.0246242 |            |                |
| DM14342P1 | 0.38942742 | -1.285257  | -1.0659122 | -1.1625421 |            |                |
| DM02839P3 | 0.38944423 | -1.1196078 | -1.0288571 | 1.117244   | CTSD       | NM_131710.1    |
| DM07914P3 | 0.3894956  | -1.0891331 | 1.0892622  | 1.1093959  | OSTLU_9300 | XM_001418838.1 |
| DM05264P2 | 0.3895499  | -1.1751635 | -1.0582314 | -1.1143407 |            |                |
| DM12130P3 | 0.38960636 | 1.2554451  | 1.0165384  | 1.2446351  |            |                |
| DM14746P4 | 0.38968292 | 1.0495602  | -1.2435827 | 1.360137   |            |                |
| DM03414P1 | 0.38984525 | 1.1562065  | 1.0712126  | -1.1733971 |            |                |
| DM14883P1 | 0.39003846 | -1.1879108 | -1.0607958 | -1.1315452 |            |                |
| DM04737P1 | 0.3901868  | 1.1173079  | -1.7151116 | -1.3180124 |            |                |
| DM00173P4 | 0.39028642 | -1.0381649 | -1.1364181 | -1.1540062 | LOC1001182 | XM_001599275.1 |
| DM08714P2 | 0.39034694 | 1.1171501  | -1.0665237 | 1.0098675  |            |                |
| DM01559P4 | 0.39037812 | -1.0778614 | -1.1656537 | -1.0395805 | DMOJ\GI203 | XM_002005123.1 |
| DM01548P2 | 0.3904196  | -1.1743734 | -1.14058   | -1.1039536 | BETATUB56D | XM_002091745.1 |
| DM13641P3 | 0.39043626 | 1.0339489  | 1.2033645  | -1.387624  |            |                |
| DM03976P2 | 0.39052108 | 1.003079   | 1.1301368  | -1.0360142 | DWIL\GK232 | XM_002074820.1 |
| DM08508P1 | 0.39054048 | 1.0015016  | 1.0084876  | -1.0575721 |            |                |
| DM01303P3 | 0.390555   | 1.1651076  | 1.3412136  | -1.1212448 |            |                |
| DM14638P3 | 0.39061716 | -1.0482032 | -1.0773678 | -1.0024618 |            |                |
| DM00161P1 | 0.39062533 | 1.0093962  | -1.0372396 | 1.1092044  | DMOJ\GI107 | XM_002001338.1 |
| DM11599P1 | 0.39069784 | -1.0222524 | -1.0354635 | -1.2387809 |            |                |
| DM12897P1 | 0.3907029  | -1.0765052 | -1.1022347 | -1.0265634 |            |                |
| DM02212P3 | 0.39072794 | -1.1170732 | 1.0139742  | 1.030104   | ARPC2      | NM_001005634.1 |
| DM04171P3 | 0.3907622  | -1.0038729 | -1.3309003 | 1.4559093  |            |                |
| DM12770P3 | 0.3909365  | -1.0597343 | 1.1064328  | -1.1845467 |            |                |
| DM07205P2 | 0.39108378 | 1.0089817  | -1.1826869 | -1.0805411 | DWIL\GK141 | XM_002073450.1 |

|           |            |            |            |            |            |                |
|-----------|------------|------------|------------|------------|------------|----------------|
| DM05397P3 | 0.39109704 | 1.0360931  | -1.6091976 | -1.0041951 |            |                |
| DM12582P2 | 0.39110482 | 1.012728   | 1.0408423  | -1.1811785 |            |                |
| DM10130P1 | 0.39112788 | 1.1705801  | 1.1251394  | -1.0721916 |            |                |
| DM13377P1 | 0.39132568 | -1.0459635 | 1.0686634  | -1.073212  |            |                |
| DM04279P3 | 0.39135563 | 1.1148689  | 1.1299728  | 1.0005625  |            |                |
| DM12845P2 | 0.391389   | 1.7267082  | 1.9906081  | 1.0607641  |            |                |
| DM07029P3 | 0.3914284  | -1.0024744 | 1.0976908  | 1.2066182  |            |                |
| DM14664P1 | 0.39155734 | -1.1057268 | -1.0497206 | 1.0858079  |            |                |
| DM14134P3 | 0.39157256 | 1.5500911  | 4.3764677  | 1.2381054  |            |                |
| DM01681P2 | 0.3915911  | -1.1657865 | -1.0459294 | -1.2647868 | RPL30      | XM_001650470.1 |
| DM08154P1 | 0.3915971  | -1.0651895 | -1.0109861 | -1.1282014 |            |                |
| DM10095P2 | 0.39179888 | 1.0808415  | 1.1295301  | 1.0628124  |            |                |
| DM02108P1 | 0.39187154 | -1.1089969 | -1.0496796 | -1.1749338 | TRIADDRAFT | XM_002107991.1 |
| DM07602P2 | 0.3920231  | 1.0157602  | -1.0211383 | 1.1536403  |            |                |
| DM01936P3 | 0.39205217 | -1.0278801 | -1.1111404 | -1.1488101 |            |                |
| DM04091P2 | 0.39211434 | 1.6565466  | 1.6062347  | -1.1769978 |            |                |
| DM10368P3 | 0.39212486 | -1.0706227 | -1.1169524 | 1.0105547  |            |                |
| DM13173P3 | 0.3921505  | -1.0254127 | -1.1152068 | -1.1897831 | LOC664351  | XM_970362.2    |
| DM02954P3 | 0.3921645  | -1.2599534 | -1.0212175 | -1.081424  | DPSE\GA180 | XM_001359854.2 |
| DM06344P2 | 0.3921683  | -1.0532049 | 1.0580405  | -1.30819   | ISCW_ISWC  | XM_002415853.1 |
| DM03141P3 | 0.39235085 | 1.0725762  | 1.120916   | 1.387696   | AQP4       | NM_001009279.1 |
| DM06675P2 | 0.39235595 | -1.0867531 | -1.2617722 | 1.1724153  |            |                |
| DM00032P1 | 0.39238757 | 1.1722754  | 1.3355888  | -1.0436654 | LOC1001546 | XM_001925061.1 |
| DM12023P3 | 0.39248762 | 1.1975149  | 1.0741242  | 1.0318509  |            |                |
| DM09696P2 | 0.39257163 | -1.1837034 | -1.2375418 | 1.2100911  |            |                |
| DM13322P1 | 0.39261547 | -1.1586051 | -1.0790484 | 1.1263735  |            |                |
| DM13270P3 | 0.39261693 | -1.6764911 | -1.2294036 | -1.113559  |            |                |
| DM14497P1 | 0.39264622 | -1.2047276 | -1.0688272 | -1.0198908 |            |                |
| DM01445P4 | 0.39277178 | 1.581014   | 1.7430766  | -1.1062552 |            |                |
| DM10172P1 | 0.39287606 | 1.1022729  | 1.0360394  | -1.0928195 |            |                |
| DM06727P3 | 0.39301366 | 1.0487598  | 1.0829368  | -1.058598  |            |                |
| DM03276P3 | 0.3931841  | 1.0173225  | -1.08666   | -1.0672592 | DMOJ\GI138 | XM_002009120.1 |
| DM01152P3 | 0.39327642 | 1.0998725  | -1.0094155 | -1.0301473 | DPER\GL159 | XM_002028591.1 |
| DM11152P2 | 0.39336148 | 1.0187906  | 1.1772587  | -1.2404406 |            |                |
| DM05950P4 | 0.39338717 | -1.0785558 | -1.0230601 | -1.1111538 |            |                |
| DM00388P4 | 0.39345676 | 1.1058362  | 1.0968481  | 1.0208396  | LOC1000197 | XM_001372484.1 |
| DM13020P1 | 0.39352125 | 1.0339432  | -1.0974237 | -1.4305723 |            |                |
| DM10384P1 | 0.39355588 | 1.1510711  | -1.0632365 | 1.0717818  |            |                |
| DM11799P2 | 0.39367998 | 1.1448264  | -1.026888  | -1.0460256 |            |                |
| DM08983P3 | 0.39369166 | -1.3138064 | -1.9880402 | -1.1970122 |            |                |
| DM11524P2 | 0.3938342  | 1.0375794  | 1.073721   | 1.4785622  |            |                |
| DM02020P4 | 0.39383656 | 1.9527452  | -1.0865946 | 1.5669408  |            |                |
| DM04504P1 | 0.39389893 | 1.6240554  | 1.8001692  | 1.411254   |            |                |
| DM01826P1 | 0.394084   | -1.0711874 | -1.2492042 | -1.0003433 | LOC578277  | XR_025987.1    |
| DM09744P2 | 0.39433998 | -1.0797402 | -1.0137709 | 1.0301049  |            |                |
| DM11241P3 | 0.3944522  | 1.06758    | 1.197668   | -1.1166811 |            |                |
| DM00507P1 | 0.3944794  | -1.0584242 | 1.1082051  | -1.0569489 | LOC1000279 | XM_001378042.1 |
| DM10972P1 | 0.39452648 | 1.0247034  | 1.1425984  | -1.0390905 |            |                |
| DM10691P1 | 0.39454582 | -1.0529063 | 1.0659103  | -1.1248382 |            |                |
| DM12199P3 | 0.39466232 | -1.4201891 | -1.9360849 | -1.0834693 |            |                |

|           |            |            |            |            |             |                |
|-----------|------------|------------|------------|------------|-------------|----------------|
| DM10786P1 | 0.39469883 | 1.3131593  | 1.0591981  | 1.4506106  |             |                |
| DM04203P1 | 0.39470667 | -1.0233355 | -1.1244388 | -1.0195732 |             |                |
| DM10520P1 | 0.39473626 | 1.0958776  | -1.0106461 | 1.0527589  |             |                |
| DM14567P2 | 0.3947675  | -1.2188131 | -1.3792973 | -1.1216028 |             |                |
| DM10140P2 | 0.39478683 | 1.0785528  | -1.0495638 | -1.0565414 |             |                |
| DM02490P2 | 0.39559823 | 1.069558   | 1.0868299  | -1.0251596 | LOC1000676  | XM_001504717.2 |
| DM12587P1 | 0.3956924  | 1.0588568  | -1.0304705 | -1.1030655 |             |                |
| DM09054P3 | 0.395712   | -1.3827232 | 1.0345231  | -1.118885  |             |                |
| DM15276P3 | 0.39597654 | 1.0208446  | 1.1401768  | 1.0437158  |             |                |
| DM12804P2 | 0.3960181  | -1.0430055 | 1.0423651  | -1.0344917 |             |                |
| DM13489P1 | 0.39620882 | 1.031485   | 1.212597   | 1.058499   |             |                |
| DM07426P2 | 0.3963388  | -1.0779098 | -1.2072326 | -1.0615191 |             |                |
| DM08931P1 | 0.3967612  | -1.0227871 | -1.1328814 | 1.0552427  |             |                |
| DM13824P1 | 0.39677477 | 1.0515782  | -1.0122254 | 1.2163931  |             |                |
| DM08827P2 | 0.39689738 | 1.1524956  | -1.8935966 | -1.0412624 |             |                |
| DM09073P1 | 0.39691976 | -1.3678694 | 1.1150668  | -1.0035821 |             |                |
| DM13534P2 | 0.3969289  | -1.4078935 | -1.7286136 | -1.4525577 | DVIR\GJ1866 | XM_002055620.1 |
| DM06022P1 | 0.3969619  | -1.1867126 | -1.1264818 | -1.118915  | LOC659426   | XM_965734.1    |
| DM09053P3 | 0.39705706 | 1.0904524  | 1.1631111  | -1.0315328 |             |                |
| DM09716P3 | 0.39707574 | -1.076371  | 1.0058184  | 1.1697794  |             |                |
| DM03144P1 | 0.397104   | 1.0697087  | -1.1799157 | 1.0279948  | DANA\GF244  | XM_001956658.1 |
| DM14166P2 | 0.3971236  | 1.2061006  | 1.2340333  | 1.2035934  |             |                |
| DM03767P2 | 0.3971421  | 1.2123379  | 1.0851673  | 1.0788559  |             |                |
| DM09576P3 | 0.39722812 | -1.1837792 | -1.1083413 | -1.0975809 |             |                |
| DM10362P1 | 0.3974697  | -1.0415044 | -1.0620337 | 1.2240407  |             |                |
| DM02802P1 | 0.39768112 | 1.0105929  | -1.009513  | -1.1373552 |             |                |
| DM03102P2 | 0.39770773 | -1.2235537 | -1.2180326 | -1.390939  |             |                |
| DM13838P2 | 0.3979418  | 1.2620558  | 1.3985369  | -1.0133244 |             |                |
| DM11991P3 | 0.39803085 | 1.034689   | -1.1639662 | -1.0286518 |             |                |
| DM04815P2 | 0.39820957 | -1.1651156 | -1.4564381 | 1.2063735  |             |                |
| DM12540P2 | 0.39826617 | 1.014426   | 1.2105844  | 1.040554   |             |                |
| DM00989P1 | 0.39850157 | -1.1057394 | -1.3880295 | 1.1295068  | ASS1        | NM_013157.3    |
| DM10628P3 | 0.39851737 | 1.0442277  | 1.2665955  | 1.3416296  |             |                |
| DM03892P2 | 0.39873394 | -1.2165772 | 1.0135413  | -1.136172  |             |                |
| DM02681P4 | 0.39881575 | 1.154165   | 1.048571   | -1.0407729 |             |                |
| DM10548P2 | 0.39886963 | -1.1375159 | -1.1715806 | 1.0522817  |             |                |
| DM09892P3 | 0.39894652 | 1.120084   | 1.0732148  | 1.0869974  |             |                |
| DM07063P1 | 0.39915773 | -1.111648  | -1.1721237 | 1.1022233  |             |                |
| DM14565P1 | 0.39920244 | 1.5375925  | 1.7037127  | -1.025645  | CP17        | NM_001172262.1 |
| DM03171P1 | 0.3994165  | 1.0499686  | 1.2060118  | 1.1409385  |             |                |
| DM04942P1 | 0.39942554 | -1.0604744 | -1.0699263 | -1.0986941 |             |                |
| DM05481P2 | 0.3995255  | 1.049269   | 1.1207311  | -1.0704492 |             |                |
| DM08006P2 | 0.3996041  | 1.2591949  | 1.0731095  | -1.0221713 |             |                |
| DM12251P4 | 0.39964998 | 1.4200827  | 1.7447067  | 1.1468729  |             |                |
| DM15148P2 | 0.39970616 | -1.1231847 | 1.0245724  | -1.0266759 |             |                |
| DM11489P1 | 0.39985204 | 1.1136223  | -1.0812345 | -1.2590165 |             |                |
| DM09277P1 | 0.40003428 | -1.032818  | 1.0397751  | -1.1105692 |             |                |
| DM13545P4 | 0.40006948 | -1.1357557 | -1.2439778 | -1.2185104 |             |                |
| DM10254P1 | 0.40021086 | 1.1018645  | -1.2427443 | -1.124416  | BRAFLDRAFT  | XM_002599296.1 |
| DM11016P1 | 0.4005138  | -1.0671502 | -1.1242198 | -1.0954865 | DWIL\GK105  | XM_002074387.1 |



|           |            |            |            |            |            |                |
|-----------|------------|------------|------------|------------|------------|----------------|
| DM11165P1 | 0.40051842 | -1.2888728 | 1.3122697  | 1.4636117  |            |                |
| DM11068P3 | 0.40067115 | -1.2021062 | -1.1868144 | -1.2025816 |            |                |
| DM01780P2 | 0.40078628 | -1.2341809 | -1.0242612 | -1.0728186 | LOC1001202 | XM_001607994.1 |
| DM10230P1 | 0.40088114 | -1.0386912 | 1.0999006  | 1.2832226  | LOC1001690 | XM_001946944.1 |
| DM15068P3 | 0.4011693  | 1.0003228  | -1.1859851 | 1.305003   |            |                |
| DM05980P2 | 0.40132812 | -1.029507  | -1.1403251 | -1.08314   |            |                |
| DM13411P1 | 0.40136173 | 1.219408   | 1.4192842  | 1.6262618  |            |                |
| DM05686P2 | 0.40172645 | 1.019311   | -1.0880326 | 1.089863   |            |                |
| DM09783P1 | 0.40173015 | -1.0956961 | 1.0262079  | 1.0492454  |            |                |
| DM05124P3 | 0.4017514  | -1.0901294 | -1.1625696 | -1.029003  | ISCW_ISCWC | XM_002412535.1 |
| DM13712P2 | 0.40194458 | 1.0638022  | -1.0222602 | -1.2108815 |            |                |
| DM08280P3 | 0.40195328 | 1.1252753  | -1.0115352 | -1.147296  |            |                |
| DM10048P2 | 0.4020143  | -1.3616182 | -1.0646714 | 1.0730698  |            |                |
| DM06989P1 | 0.4020616  | 1.0978618  | 1.5141479  | 1.1374979  | RUT        | NM_078601.2    |
| DM13335P2 | 0.4021099  | 1.0445665  | 1.1185632  | 1.2878332  |            |                |
| DM14101P3 | 0.4021981  | 1.2248662  | -1.0197643 | -1.0902987 |            |                |
| DM12814P1 | 0.40229025 | 1.1007391  | 1.0112364  | 1.2825254  |            |                |
| DM14595P4 | 0.40230894 | 1.0281589  | 1.2118636  | -1.3804841 |            |                |
| DM10178P3 | 0.40238386 | -1.0689936 | 1.1609124  | 1.1045177  |            |                |
| DM01631P3 | 0.40241364 | -1.0153743 | 1.0061418  | -1.2508221 | CYP1       | XM_002100756.1 |
| DM04794P3 | 0.40273848 | -1.0484029 | -1.0921692 | -1.1258236 |            |                |
| DM08662P2 | 0.40294662 | -1.0386671 | -1.1150528 | -1.2582302 |            |                |
| DM09466P3 | 0.4029594  | 1.1199652  | 1.0573658  | 1.205924   |            |                |
| DM03647P3 | 0.40299404 | 1.0033139  | 1.0169958  | 1.122405   |            |                |
| DM03909P2 | 0.40312055 | 1.2768979  | 1.2572912  | 1.5415368  |            |                |
| DM13872P3 | 0.40339887 | 1.1414349  | -1.1101559 | -1.1245695 |            |                |
| DM06233P1 | 0.4034087  | 1.2130967  | 1.1499691  | 1.0946995  |            |                |
| DM02216P3 | 0.40350342 | 1.324995   | 1.3647368  | 1.1670164  | LOC552063  | XM_624442.2    |
| DM05157P2 | 0.40357852 | -1.340286  | 1.0690118  | -1.0097276 |            |                |
| DM02460P4 | 0.4035954  | -1.0942106 | -1.0543838 | -1.1842948 | DMOJ\GI242 | XM_001998828.1 |
| DM07657P3 | 0.4036145  | 1.7916605  | 2.104429   | 1.2591461  |            |                |
| DM04280P1 | 0.40375745 | -1.1766206 | -1.0266652 | -1.1246741 | LOC1001181 | XM_001607804.1 |
| DM14655P3 | 0.40375856 | 1.0660932  | -1.063669  | 1.1621879  |            |                |
| DM05905P1 | 0.4037734  | -1.0217038 | 1.0912936  | -1.0517255 | LOC1001674 | XM_001946737.1 |
| DM15174P2 | 0.40388116 | -1.0669382 | -1.1043895 | -1.1447169 |            |                |
| DM05912P4 | 0.4039732  | -1.350579  | -1.1577227 | -1.1005466 | COPB1      | XM_001504942.1 |
| DM02014P1 | 0.40412608 | -1.1052821 | -1.0902458 | 1.1357142  | ACTC1B     | NM_131591.1    |
| DM14656P2 | 0.4042443  | 1.0496657  | 1.229697   | -1.001623  |            |                |
| DM06277P1 | 0.40452427 | 1.0989108  | -1.1316627 | -1.0622046 |            |                |
| DM06285P2 | 0.4045731  | 1.1212873  | -1.0131783 | 1.2955996  | DANA\GF153 | XM_001962130.1 |
| DM03898P3 | 0.4045811  | 1.0519704  | 1.0058328  | -1.1201708 | BRAFLDRAFT | XM_002601712.1 |
| DM09101P3 | 0.40459466 | -1.182243  | -1.0004061 | -1.4904695 |            |                |
| DM03185P3 | 0.40462384 | -1.2009438 | 1.0198545  | 1.0721674  | DHRS7B     | NM_001078778.1 |
| DM07066P1 | 0.4049196  | 1.0510647  | -1.5608102 | 1.1013191  |            |                |
| DM11518P3 | 0.40492368 | 1.0904635  | -1.2122785 | 1.1645668  |            |                |
| DM09059P3 | 0.40493205 | -1.1420029 | 1.120886   | -1.1850901 |            |                |
| DM02532P2 | 0.4050506  | -1.0348763 | -1.075408  | -1.1243961 | LOC724279  | XR_014868.1    |
| DM12009P3 | 0.40514654 | -1.1132891 | -1.2795333 | -1.1086979 |            |                |
| DM03407P3 | 0.40528077 | -1.0458982 | -1.0514362 | -1.1422397 |            |                |
| DM02309P3 | 0.405508   | -1.0254446 | 1.0284557  | -1.1332306 | LOC1001662 | XM_001951155.1 |

|           |            |            |            |            |            |                |
|-----------|------------|------------|------------|------------|------------|----------------|
| DM13552P2 | 0.4056602  | 1.1319821  | -1.0918574 | 1.0195163  |            |                |
| DM05228P2 | 0.40573853 | 1.168286   | -1.2146231 | 1.0814576  |            |                |
| DM02946P4 | 0.4057754  | -1.1492007 | -1.130378  | -1.1483239 | LOC552007  | XM_624387.2    |
| DM08525P1 | 0.4059574  | -1.148662  | 1.0501709  | -1.0131637 |            |                |
| DM11375P2 | 0.40595984 | -1.1108481 | -1.0567068 | -1.2153083 |            |                |
| DM04354P3 | 0.40597025 | -1.0332137 | 1.0681509  | -1.126756  | SMG        | XM_001662946.1 |
| DM13881P3 | 0.40597212 | -1.1027712 | -1.1730506 | -1.1581919 |            |                |
| DM12699P2 | 0.40607488 | -1.016685  | -1.0512915 | 1.3816686  |            |                |
| DM06141P2 | 0.4061799  | -1.2018178 | 1.1567354  | -1.0291995 |            |                |
| DM03772P3 | 0.40623412 | 1.0108172  | -1.1008703 | -1.0352882 |            |                |
| DM06507P1 | 0.4062676  | 1.224548   | 1.2413191  | -1.0181812 |            |                |
| DM04433P3 | 0.40637082 | -1.0760341 | -1.288124  | -1.1125205 |            |                |
| DM05767P1 | 0.40650702 | -1.116137  | -1.0886488 | -1.3140632 |            |                |
| DM12565P2 | 0.4065277  | -1.0791038 | -1.62143   | 1.1176602  |            |                |
| DM04824P2 | 0.40657744 | -1.1536018 | -1.1651676 | 1.242761   |            |                |
| DM06841P4 | 0.40661955 | 1.0046073  | -1.1428616 | 1.1186935  |            |                |
| DM14535P3 | 0.40664023 | 1.1043497  | 1.2102361  | 1.0874835  | LOC1000330 | XM_001381919.1 |
| DM15189P3 | 0.40677947 | -1.2517546 | -1.133629  | -1.0796031 |            |                |
| DM12321P4 | 0.40681824 | 1.3288835  | 1.4159037  | 1.1473036  |            |                |
| DM02566P1 | 0.40683764 | -1.1669899 | 1.1349822  | 1.2250559  | LOC657776  | XM_970882.2    |
| DM13968P1 | 0.4069059  | -1.128295  | 1.0067456  | 1.0761855  |            |                |
| DM11020P1 | 0.4071028  | 1.0251898  | 2.2153656  | -1.1364117 |            |                |
| DM14745P1 | 0.40712854 | 1.1819005  | 1.2446716  | 1.4822946  |            |                |
| DM10563P3 | 0.4072082  | -1.1159858 | -1.0188724 | -1.1229177 |            |                |
| DM03730P4 | 0.40740952 | -1.2774556 | -1.1384633 | -1.4149882 |            |                |
| DM12962P2 | 0.40746623 | -1.056303  | 1.2203103  | -1.0967393 |            |                |
| DM08727P3 | 0.4075616  | 1.1880901  | 1.2024012  | 1.1260138  |            |                |
| DM05539P1 | 0.4075799  | -1.0924592 | -1.0499227 | -1.1834203 | LOC1001621 | XM_001948045.1 |
| DM00790P3 | 0.40766895 | -1.0556304 | 1.1043824  | 1.0470725  | LOC1001653 | XM_001946629.1 |
| DM08486P1 | 0.40772644 | 1.0985239  | 1.127373   | -1.1444919 |            |                |
| DM13305P1 | 0.40780243 | -1.0223552 | 1.1250829  | -1.0315622 |            |                |
| DM11771P1 | 0.40805364 | 1.0568132  | -1.4441947 | -1.1678392 |            |                |
| DM04841P1 | 0.4080942  | -1.0502589 | -1.0941631 | 1.1095433  | DSIM\GD211 | XM_002104703.1 |
| DM07855P1 | 0.4084902  | 1.1031952  | 1.4244208  | 1.2778136  |            |                |
| DM05404P2 | 0.40850347 | -1.0684688 | 1.09277    | 1.0676053  |            |                |
| DM08664P2 | 0.40854198 | 1.1624917  | -1.2140203 | 1.3807036  |            |                |
| DM02068P2 | 0.4086093  | 1.0221952  | 1.0150045  | 1.1421325  | DLST       | XM_001655890.1 |
| DM10003P3 | 0.40865436 | -1.4304852 | 1.1749699  | -1.9590902 |            |                |
| DM09657P3 | 0.40866578 | -1.049456  | 1.0295918  | -1.1564331 |            |                |
| DM02360P4 | 0.40873516 | 1.2834078  | 1.0805266  | 1.1325204  | DDC        | XM_002067006.1 |
| DM13204P3 | 0.40874806 | 1.0579429  | -1.036764  | 1.0123736  |            |                |
| DM09830P2 | 0.4088354  | -1.591782  | 1.0833555  | -1.2666892 |            |                |
| DM15198P1 | 0.40888327 | 1.0649656  | 2.1425316  | 1.1989362  | LOC1001657 | NM_001134286.1 |
| DM07352P1 | 0.4090034  | 1.1311182  | 1.0605656  | 1.2301672  |            |                |
| DM05886P1 | 0.40932062 | -1.0079155 | 1.0656323  | 1.0686315  |            |                |
| DM12723P3 | 0.4094586  | 1.075959   | 1.0974745  | 1.1621386  |            |                |
| DM01798P3 | 0.40953687 | -1.1198945 | -1.1825621 | -1.0076495 | TUBA       | XM_001663357.1 |
| DM06819P3 | 0.40962696 | -1.5099981 | 1.2676461  | -1.2080555 |            |                |
| DM00082P2 | 0.40981373 | -1.1159413 | -1.1091464 | 1.0399696  | NCU02003   | XM_959775.2    |
| DM08480P1 | 0.40986452 | -1.1331393 | 1.1154141  | 1.2049719  |            |                |

|           |            |            |            |            |            |                |
|-----------|------------|------------|------------|------------|------------|----------------|
| DM06291P2 | 0.410033   | -1.0281562 | -1.0901042 | -1.230385  |            |                |
| DM13585P3 | 0.41006073 | -1.1653332 | 1.2518373  | 1.083097   |            |                |
| DM12353P1 | 0.41008267 | 1.038648   | -1.1190436 | -1.090027  |            |                |
| DM07673P3 | 0.41023093 | -1.0562128 | 1.0815499  | -1.1331204 |            |                |
| DM13161P2 | 0.4103399  | -1.3173184 | -1.2109579 | -1.2115685 |            |                |
| DM01340P3 | 0.41034082 | 1.1011968  | -1.2686197 | 1.090589   |            |                |
| DM09652P1 | 0.41039822 | -1.0393982 | 1.0278832  | 1.1308467  |            |                |
| DM07865P2 | 0.41047847 | 1.1243364  | -1.2920114 | -1.0323038 |            |                |
| DM05616P2 | 0.41059196 | 1.0566926  | -1.2100484 | -1.41566   |            |                |
| DM09340P1 | 0.41061354 | 1.1655402  | 1.1901342  | 1.2385606  | FGFR2      | NM_001144919.1 |
| DM10409P1 | 0.4107811  | 1.3999304  | 1.3973083  | 1.554431   |            |                |
| DM08757P1 | 0.4108252  | 1.1204505  | 1.0795537  | 1.1559885  |            |                |
| DM14897P2 | 0.41100293 | -1.0989109 | 1.1440722  | 1.277234   |            |                |
| DM07068P2 | 0.411079   | 1.1230192  | 1.5980603  | 1.0200061  |            |                |
| DM03723P1 | 0.41109437 | 1.5208414  | 1.9596612  | 1.0274274  |            |                |
| DM08307P1 | 0.41122788 | 1.5064701  | 1.1147805  | 1.2245132  |            |                |
| DM12625P3 | 0.41128612 | 1.2289277  | 1.0890361  | -1.1103421 |            |                |
| DM14447P1 | 0.41156676 | -1.2641289 | -1.0001508 | 1.128699   |            |                |
| DM00133P3 | 0.4116081  | 1.1285075  | 1.063645   | 1.019568   | LOC1001682 | XM_001943348.1 |
| DM08226P1 | 0.41166675 | -1.0124608 | -1.0403094 | -1.347097  |            |                |
| DM09021P3 | 0.4116878  | 1.0598315  | 1.0617697  | 1.2013521  |            |                |
| DM11962P3 | 0.41171503 | -1.0234597 | -1.0931377 | -1.0663462 |            |                |
| DM11992P1 | 0.4117891  | 1.1100694  | 1.0367898  | -1.124575  |            |                |
| DM11461P1 | 0.41180396 | 1.0759422  | 1.1873089  | -1.016047  |            |                |
| DM05258P1 | 0.41189814 | -1.2044843 | 1.1901959  | -1.3556671 |            |                |
| DM05552P2 | 0.41211212 | 3.2080352  | -1.2974254 | 1.2709095  |            |                |
| DM11923P1 | 0.4121313  | 1.0230397  | -1.1173043 | 1.3639529  |            |                |
| DM08977P2 | 0.41218454 | -1.100987  | -1.2525705 | 1.1632893  |            |                |
| DM04380P2 | 0.41219    | 1.112643   | -1.0020788 | 1.1412002  |            |                |
| DM07858P1 | 0.41238302 | 1.0578216  | -1.0776063 | -1.0815486 |            |                |
| DM01643P2 | 0.41241857 | -1.1277523 | -1.1041844 | -1.0882055 | RPS27A     | NM_001016172.2 |
| DM10242P3 | 0.41263387 | 1.0989047  | 1.0566189  | -1.0675719 | LOC1001178 | XM_001600877.1 |
| DM03611P1 | 0.41264874 | 1.0647764  | -1.7766113 | 1.1174994  | AGAP_AGAP0 | XM_312888.4    |
| DM11508P2 | 0.41272196 | 1.0425444  | -1.1661985 | -1.1169207 |            |                |
| DM04018P3 | 0.41297278 | -1.0561342 | -1.1606525 | 1.0938575  |            |                |
| DM04231P2 | 0.41301912 | 1.112084   | 1.415905   | 1.0814586  |            |                |
| DM11079P1 | 0.4130743  | 1.1162201  | -1.1083294 | 1.1213831  |            |                |
| DM14816P2 | 0.413131   | -1.0548935 | 1.0234454  | 1.0907693  |            |                |
| DM00105P1 | 0.41313347 | -1.0285456 | -1.1101383 | 1.0986005  | NEMVEDRAFT | XM_001639780.1 |
| DM11872P2 | 0.41315907 | -1.0825114 | 1.0074468  | -1.0577892 |            |                |
| DM14293P2 | 0.4131945  | 1.1821167  | 1.2846864  | -1.1002458 |            |                |
| DM01214P3 | 0.41322237 | 1.11128    | 1.0165839  | -1.0326227 |            |                |
| DM06906P3 | 0.4133198  | -1.0667613 | -1.0405133 | -1.1114287 |            |                |
| DM09615P1 | 0.41335183 | 1.2038244  | 1.4057387  | 1.3153899  |            |                |
| DM02315P3 | 0.413421   | -1.064437  | -1.1775692 | -1.0959338 | DSIM\GD157 | XM_002107043.1 |
| DM08754P4 | 0.41349038 | 1.0040711  | 1.0027277  | 1.8413664  | T20B6.3    | NM_065236.1    |
| DM06201P1 | 0.41353655 | -1.0829394 | -1.0806862 | -1.2351538 | FKBP2      | NM_001086024.1 |
| DM03057P3 | 0.41380242 | 1.1253502  | 1.2059141  | 1.1815734  |            |                |
| DM00650P1 | 0.41401803 | -1.0306712 | 1.1951479  | 1.1911352  | LOC662963  | XM_969031.2    |
| DM09982P2 | 0.4141018  | 1.1963644  | -1.1559905 | 1.2693598  |            |                |

|           |            |            |            |            |             |                |
|-----------|------------|------------|------------|------------|-------------|----------------|
| DM07103P2 | 0.41417897 | 1.0585675  | 1.1867514  | 1.0077447  |             |                |
| DM05266P3 | 0.41418803 | -1.1026736 | -1.1190034 | -1.2001569 |             |                |
| DM09792P2 | 0.41421294 | -1.0211006 | -1.0942478 | -1.1743915 | ROBO2       | XM_614756.4    |
| DM14678P1 | 0.41435224 | -1.11215   | -1.0153192 | -1.0767878 |             |                |
| DM04101P2 | 0.4143562  | -1.1227883 | -1.0794712 | 1.0908313  |             |                |
| DM13594P3 | 0.4143832  | -1.057991  | -1.2905256 | -1.0081313 |             |                |
| DM08138P2 | 0.41444927 | 1.0280238  | -1.1170763 | 1.077384   |             |                |
| DM10547P3 | 0.4145176  | 1.0613366  | 1.2127628  | 1.4066119  |             |                |
| DM07229P3 | 0.41453272 | 1.0009755  | -1.0850964 | -1.1682487 |             |                |
| DM12631P4 | 0.41458786 | 1.1353221  | -1.0006955 | -1.0939296 |             |                |
| DM00428P3 | 0.41470024 | -1.2679747 | -1.2800909 | 1.141666   | DMOJ\GI1472 | XM_002010320.1 |
| DM12650P3 | 0.41473347 | -1.0282321 | 1.028902   | 1.1046337  |             |                |
| DM08366P1 | 0.4147673  | 1.0428071  | -1.0139328 | -1.1151674 |             |                |
| DM06595P1 | 0.41478163 | -1.162743  | -1.1809883 | -1.1661459 | DWIL\GK1590 | XM_002063835.1 |
| DM05209P4 | 0.41486305 | -1.008929  | -1.0001396 | -1.3531733 |             |                |
| DM10669P2 | 0.41493562 | -1.1152706 | 1.0346098  | -1.0784755 |             |                |
| DM09702P1 | 0.41505352 | -1.2526201 | -1.008525  | -1.0874076 |             |                |
| DM11925P1 | 0.41518357 | -1.3459482 | 1.0161223  | -1.4992312 |             |                |
| DM10665P3 | 0.41518375 | 1.6147273  | 1.2253036  | -1.0660679 |             |                |
| DM08783P1 | 0.41519395 | 1.0655495  | -1.1581632 | 1.1063317  |             |                |
| DM14817P2 | 0.41547397 | -1.203077  | -1.0298911 | 1.0754427  |             |                |
| DM11551P2 | 0.4154893  | -1.1375426 | -1.0812497 | -1.1212424 |             |                |
| DM10427P3 | 0.41549572 | 1.461441   | 1.9129665  | 1.3312469  | CUTICLE PRO | XM_001659411.1 |
| DM12193P3 | 0.41550404 | 1.0558987  | -1.0430783 | 1.0598038  |             |                |
| DM08570P1 | 0.41559425 | -1.0060968 | 1.3207213  | 1.2113587  |             |                |
| DM12782P1 | 0.4157961  | -1.1037419 | 1.0300674  | -1.2444253 |             |                |
| DM14971P1 | 0.41595393 | -1.0085117 | -1.3880827 | -1.1398842 |             |                |
| DM05583P1 | 0.41596338 | 1.1141125  | 1.1724339  | 1.3207113  |             |                |
| DM06849P1 | 0.41596434 | 1.0234033  | 1.002655   | 1.3604041  |             |                |
| DM03612P1 | 0.41602302 | 1.1079897  | -1.1410388 | 1.1839603  |             |                |
| DM05696P2 | 0.41620758 | 1.0345018  | 1.053546   | -1.1581999 |             |                |
| DM01678P1 | 0.41622198 | 1.0158004  | -1.0087454 | 1.0074496  |             |                |
| DM10046P1 | 0.41632366 | 1.2499076  | 1.4727324  | 1.5073816  |             |                |
| DM00996P3 | 0.41633275 | -1.1341404 | -1.2453102 | -1.1510739 | RDH12L      | NM_001009912.1 |
| DM12163P4 | 0.4164911  | 1.1800119  | -1.124956  | -1.0811086 |             |                |
| DM09439P2 | 0.41661632 | 1.3029875  | 1.386855   | 1.0784541  |             |                |
| DM01302P1 | 0.41662467 | -1.0798054 | 1.0403492  | -1.1233505 | LOC591939   | XM_001194311.1 |
| DM06540P4 | 0.41662902 | -1.1618915 | -1.1886703 | -1.0241302 |             |                |
| DM05341P1 | 0.41673777 | 1.063288   | 1.1574324  | -1.1572491 |             |                |
| DM07637P4 | 0.4167806  | -1.0709424 | -1.03367   | -1.0961765 |             |                |
| DM04961P3 | 0.41678572 | 1.0474453  | -1.0593905 | -1.0632278 |             |                |
| DM06058P3 | 0.41678837 | -1.0057093 | 1.1685175  | -1.2126378 |             |                |
| DM09023P2 | 0.41689718 | -1.1140219 | -1.1674807 | 1.0121412  |             |                |
| DM10269P4 | 0.41694096 | -1.0372211 | 1.0235561  | -1.1926149 |             |                |
| DM09728P1 | 0.4170325  | 1.0504055  | -1.0618879 | 1.0653303  |             |                |
| DM08829P2 | 0.41731262 | 1.0033199  | 1.0586802  | 1.0304855  |             |                |
| DM11303P3 | 0.4174623  | 1.0916208  | 1.0349874  | -1.0318968 |             |                |
| DM03093P1 | 0.4176579  | 1.04478    | 1.0099703  | 1.1799788  | LOC725453   | XM_001120307.1 |
| DM03435P4 | 0.41774485 | -1.0727371 | -1.1080481 | -1.1098356 |             |                |
| DM07979P4 | 0.4177513  | -1.1265178 | 1.0226561  | -1.0617568 |             |                |

|           |            |            |            |            |            |                |
|-----------|------------|------------|------------|------------|------------|----------------|
| DM14174P1 | 0.41778985 | -1.2134994 | -1.1922117 | 1.0205003  |            |                |
| DM12615P4 | 0.41786066 | 1.2342166  | 1.1908752  | 1.0757009  |            |                |
| DM00966P3 | 0.417929   | 1.1025978  | -1.2323196 | 1.0539201  | DSIM\GD132 | XM_002083536.1 |
| DM01151P3 | 0.41792974 | -1.0269331 | -1.147893  | -1.2253964 | LOC1001675 | XM_001948600.1 |
| DM08971P1 | 0.4179776  | -1.0942405 | -1.1016061 | -1.1828156 |            |                |
| DM05821P3 | 0.41801557 | 1.1613357  | 1.1142191  | 1.1935766  |            |                |
| DM07870P3 | 0.41804975 | -1.0173981 | -1.3082867 | 1.0117439  |            |                |
| DM10685P2 | 0.41808414 | 1.1050931  | -1.0344888 | -1.0775894 |            |                |
| DM06299P3 | 0.41834056 | -1.0912848 | 1.0593269  | -1.1326141 |            |                |
| DM08186P2 | 0.41846827 | -1.1442924 | 1.0346396  | 1.0292298  |            |                |
| DM02887P4 | 0.41852832 | -1.0554796 | 1.0485913  | -1.061596  |            |                |
| DM00994P2 | 0.4185287  | -1.0706402 | -1.3777981 | -1.1498208 | SODIUM/CHL | XM_001660967.1 |
| DM10295P2 | 0.41855797 | -1.2886735 | 1.1153263  | -1.2793905 |            |                |
| DM06256P4 | 0.41860604 | -1.0560668 | -1.081451  | 1.3125378  |            |                |
| DM02749P1 | 0.4187085  | 1.8549885  | 2.5045085  | 1.4973141  |            |                |
| DM15295P1 | 0.41872257 | -1.0270935 | 1.0840777  | -1.0771347 | METTL5     | NM_001114181.1 |
| DM12883P2 | 0.4187705  | 1.205796   | -1.2314403 | 1.5312046  |            |                |
| DM13198P1 | 0.41878265 | -1.2771374 | 1.0155692  | -1.170197  |            |                |
| DM12284P1 | 0.41880852 | 1.0498371  | -1.0956223 | 1.1072317  |            |                |
| DM07903P3 | 0.4188165  | -1.1771306 | -1.014582  | -1.0737163 |            |                |
| DM05916P2 | 0.41906068 | -1.2328571 | -1.3847965 | -1.2120761 |            |                |
| DM12142P4 | 0.41911054 | -1.0313041 | -1.2008978 | -1.0337529 |            |                |
| DM06341P1 | 0.41912574 | -1.1258821 | -1.3813646 | -1.1020309 | DNM1L      | NM_005690.3    |
| DM02432P3 | 0.4191362  | 1.2124997  | -1.0569777 | 1.1124449  |            |                |
| DM09598P1 | 0.41920373 | -1.0686291 | -1.1267478 | -1.0640633 | DMOJ\GI154 | XM_002009571.1 |
| DM10356P3 | 0.41923723 | -1.002873  | -1.0600688 | -1.0937817 |            |                |
| DM04974P2 | 0.41943038 | 1.3374814  | 1.3067434  | 1.166917   |            |                |
| DM08766P1 | 0.41944826 | -1.1567616 | 1.0330337  | 1.253455   |            |                |
| DM04852P1 | 0.4194987  | -1.1880372 | -1.0414914 | -1.1706874 | CDC2       | NM_001044047.1 |
| DM04582P2 | 0.41953108 | -1.0646409 | -1.1664637 | -1.0001329 |            |                |
| DM00820P3 | 0.41955334 | -1.4647863 | -1.1977487 | -1.2173693 |            |                |
| DM09565P2 | 0.4195857  | -1.0102365 | -1.1382836 | -1.2458497 | ISCW_ISCWC | XM_002407091.1 |
| DM02766P3 | 0.41959485 | -1.0901458 | 1.0290972  | 1.212826   | DANA\GF164 | XM_001954893.1 |
| DM14299P1 | 0.41964245 | -1.2607514 | -1.4180863 | 1.131903   |            |                |
| DM07994P2 | 0.4196773  | 1.0595566  | 1.1418833  | -1.1098813 |            |                |
| DM10024P2 | 0.42000866 | 1.1118283  | 1.1902821  | 1.5546428  |            |                |
| DM08246P1 | 0.42008868 | 1.1271977  | 1.0941713  | 1.2780083  |            |                |
| DM02613P1 | 0.42068267 | -1.0602984 | -1.1315856 | -1.1243732 |            |                |
| DM13779P1 | 0.42068627 | -1.1660117 | 1.0317591  | -1.0841161 |            |                |
| DM02118P1 | 0.42072594 | 1.0590768  | -1.0655657 | 1.1170524  | CG34417    | NM_001103425.1 |
| DM13533P1 | 0.42092243 | -1.2024288 | -1.2957078 | -1.1867869 |            |                |
| DM00261P1 | 0.42099264 | 1.4087985  | -1.0855271 | 1.0963817  | VTG6       | NM_001025189.1 |
| DM10364P2 | 0.4210182  | 1.3137057  | -1.3890892 | 1.4119838  |            |                |
| DM01488P3 | 0.4212184  | 1.040679   | -1.029286  | -1.1507297 |            |                |
| DM12877P1 | 0.4212837  | 1.186801   | 1.1313962  | 1.0764831  |            |                |
| DM02037P2 | 0.4213442  | -1.0948095 | -1.1338571 | -1.1456897 | RER1       | NM_001093371.1 |
| DM06742P2 | 0.42152178 | -1.3324722 | 1.0394088  | -5.1250916 |            |                |
| DM05036P4 | 0.42178366 | 1.0454344  | 1.0852815  | -1.0091373 |            |                |
| DM14051P2 | 0.42189464 | -1.1004045 | -1.0234556 | 1.0729549  |            |                |
| DM08547P3 | 0.42192197 | 1.0134584  | -1.4231714 | -1.0632993 |            |                |

|           |            |            |            |            |            |                |
|-----------|------------|------------|------------|------------|------------|----------------|
| DM04616P2 | 0.42214024 | -1.0840539 | 1.5026659  | 1.2039142  |            |                |
| DM00088P1 | 0.42218497 | -1.0547155 | 1.207656   | -1.0315366 | AGAP_AGAP0 | XM_315369.4    |
| DM00537P4 | 0.42235684 | 1.1670893  | -1.0131195 | -1.0467876 | LOC661334  | XM_967498.2    |
| DM03299P1 | 0.42253357 | 1.0639824  | -1.0729429 | -1.1571463 |            |                |
| DM12635P3 | 0.42267245 | -1.045141  | -1.0586404 | -1.2166569 |            |                |
| DM14673P1 | 0.4226799  | -1.061429  | 1.4723489  | 1.0228263  |            |                |
| DM14821P2 | 0.4226931  | -2.4135678 | -1.0670604 | -1.0656935 |            |                |
| DM08096P2 | 0.42270592 | -1.78833   | -1.1983066 | -1.0057259 |            |                |
| DM08947P2 | 0.42274553 | 1.0458324  | -1.3464595 | 1.2803298  |            |                |
| DM11353P1 | 0.42293385 | -1.0551738 | -1.0009018 | 1.0685282  |            |                |
| DM03498P2 | 0.42323497 | 1.126292   | 1.2148097  | 1.182306   | LOC593529  | XM_001179828.1 |
| DM00283P3 | 0.42329434 | -1.0399811 | 1.0287161  | -1.0816638 | LOC551386  | XM_623781.2    |
| DM07571P3 | 0.42338645 | -1.1926091 | -1.2891089 | -1.5444713 |            |                |
| DM09888P4 | 0.42368054 | 1.2955635  | 1.2270039  | 1.6735109  |            |                |
| DM10307P2 | 0.4237219  | 1.1363648  | -1.3833197 | 1.0432041  |            |                |
| DM08680P2 | 0.42374414 | -1.0422333 | 1.136873   | 1.2304114  |            |                |
| DM03354P3 | 0.42394444 | -1.0575055 | 1.0588757  | 1.0640223  | PPP6C      | NM_001017110.3 |
| DM10622P3 | 0.42403647 | 1.2296385  | -1.2119877 | 1.8852829  |            |                |
| DM13316P1 | 0.4241266  | -1.4544969 | 1.3418435  | -1.5186758 | DMOJ\GI237 | XM_001998158.1 |
| DM05225P2 | 0.42414    | -1.0491457 | 1.1657119  | 1.0141819  |            |                |
| DM03837P2 | 0.42431837 | -1.1251407 | -1.1461719 | -1.1332421 |            |                |
| DM03573P2 | 0.42447147 | -1.1263212 | -1.2264746 | -1.1906924 |            |                |
| DM02935P3 | 0.42449775 | -1.0812528 | -1.0804839 | -1.003099  | DMOJ\GI106 | XM_002001190.1 |
| DM02368P2 | 0.42455935 | 1.1446776  | 1.222994   | 1.2073691  | UAP1       | XM_513954.2    |
| DM13931P3 | 0.42484188 | -1.1728114 | 1.1216129  | 1.0645074  |            |                |
| DM04913P3 | 0.42488334 | 1.169336   | -1.0094622 | 1.1723487  |            |                |
| DM10154P3 | 0.42500526 | 1.021356   | 1.061204   | 1.183148   |            |                |
| DM09256P1 | 0.42501697 | 1.0188901  | -1.3641481 | 1.0234418  |            |                |
| DM09187P1 | 0.42504004 | -1.0910699 | -1.1451887 | 1.1787179  |            |                |
| DM14097P2 | 0.42504004 | 1.1613126  | 1.3667666  | -1.0697818 |            |                |
| DM08484P2 | 0.42508343 | 1.0364388  | -1.0099435 | 1.1331695  |            |                |
| DM13141P3 | 0.42516717 | 1.1344335  | -1.106903  | 1.112229   |            |                |
| DM05330P2 | 0.42536792 | -1.0533096 | -1.0889693 | -1.0215194 |            |                |
| DM10257P1 | 0.42544344 | -1.1653513 | -1.1983662 | -1.1557093 |            |                |
| DM12194P1 | 0.4254442  | -1.1270723 | 1.0553558  | -1.1982256 |            |                |
| DM10040P1 | 0.42546535 | -1.0078728 | 1.1656268  | -1.0890478 |            |                |
| DM12670P1 | 0.42549685 | -1.3916973 | -1.004801  | -1.7094773 |            |                |
| DM03668P1 | 0.42551896 | -1.0223701 | -1.0935682 | 1.1487308  | BIN        | XM_001858581.1 |
| DM14540P4 | 0.42553952 | -1.1457908 | -1.0681723 | -1.2058088 |            |                |
| DM11426P2 | 0.4255845  | 1.1607182  | -1.0925369 | -1.4975104 |            |                |
| DM08158P2 | 0.42568174 | -1.1136215 | -1.0021808 | -1.0878896 |            |                |
| DM13559P1 | 0.42573577 | -1.3970183 | -1.7256142 | -1.4110286 |            |                |
| DM01110P3 | 0.4257369  | 1.093614   | 1.291175   | -1.067437  | DANA\GF138 | XM_001961267.1 |
| DM03227P4 | 0.4257471  | -1.1147    | -1.0642122 | 1.1091157  |            |                |
| DM00406P1 | 0.42588094 | 1.1316851  | 1.1773527  | 1.0533348  | LOC1000822 | XM_001512905.1 |
| DM04874P1 | 0.42597803 | -1.055377  | 1.0762631  | -1.2272625 | LOC1001665 | XM_001949252.1 |
| DM06925P2 | 0.4260413  | 1.4760805  | -1.0146202 | 1.6874619  | AT1G63510  | NR_022362.1    |
| DM07150P3 | 0.42616925 | 1.2009438  | -1.0252941 | 1.2483218  |            |                |
| DM02931P2 | 0.42648    | -1.1380942 | -1.081902  | -1.0032116 | MRPS25     | XM_001654733.1 |
| DM07945P1 | 0.42653352 | 1.1351796  | -1.1351222 | 1.1305054  |            |                |

|           |            |            |            |            |                             |
|-----------|------------|------------|------------|------------|-----------------------------|
| DM03944P1 | 0.42662457 | -1.0035607 | 1.2322867  | -1.0491157 |                             |
| DM04666P4 | 0.42667347 | 1.0561849  | 1.1326183  | 1.056664   |                             |
| DM13625P2 | 0.42686275 | -1.0036515 | 1.146826   | -1.0777047 |                             |
| DM11941P1 | 0.42701375 | 1.064425   | 1.0197556  | 1.0801936  |                             |
| DM06395P4 | 0.42705268 | 1.14954    | -1.084514  | 1.2917819  |                             |
| DM14244P1 | 0.42707965 | -1.0260034 | 1.0341545  | -1.2489058 |                             |
| DM07958P3 | 0.42721972 | 1.0252162  | -1.0462165 | 1.1074947  |                             |
| DM15053P3 | 0.42738196 | -1.0315502 | 1.2210912  | -1.2052779 |                             |
| DM06373P4 | 0.4274988  | -1.0785314 | 1.0295483  | 1.0737486  |                             |
| DM15194P4 | 0.4275092  | -1.1252942 | -1.1550841 | 1.017802   |                             |
| DM03440P2 | 0.42758688 | 1.0280373  | 1.1674968  | -1.0513531 |                             |
| DM05659P1 | 0.42760754 | 1.1387134  | 1.0576532  | 1.0385185  |                             |
| DM09558P4 | 0.42760754 | 1.0978854  | -1.0470917 | -1.1548684 |                             |
| DM07489P1 | 0.42773113 | 1.0727576  | -1.0452162 | 1.0714217  |                             |
| DM05109P2 | 0.4278044  | -1.0155525 | -1.3079702 | -1.0001394 |                             |
| DM02540P3 | 0.4278644  | 1.2988273  | 1.0979578  | 1.25822    |                             |
| DM02437P3 | 0.42796916 | 1.0578833  | 1.4441074  | -1.0733064 | CPIPJ_CPIJOC XM_001846432.1 |
| DM05843P2 | 0.42816848 | -1.0871527 | -1.2253543 | -1.337876  | STEROID DEF XM_001653839.1  |
| DM13740P3 | 0.4281702  | -1.0554045 | 1.1278762  | 1.2244672  |                             |
| DM06638P3 | 0.42823583 | 1.0834143  | 1.0234092  | 1.227964   |                             |
| DM02918P2 | 0.42837092 | 1.0622582  | -1.0608127 | -1.2083125 | LOC1000216: XM_001373725.1  |
| DM13576P1 | 0.4283935  | 1.102061   | -1.2580602 | -1.2192074 |                             |
| DM00156P3 | 0.42845762 | -1.0634611 | -1.1068113 | -1.1336926 | LOC1000274: XM_001377686.1  |
| DM03505P2 | 0.42847112 | 1.1058704  | 1.4127067  | -1.0400696 |                             |
| DM09812P1 | 0.42850608 | 1.0989447  | 1.3424047  | -1.0067947 |                             |
| DM04138P3 | 0.42855185 | -1.232039  | -1.4114151 | -1.2179377 |                             |
| DM04361P3 | 0.4286142  | -1.0837188 | -1.3827958 | -1.0745299 |                             |
| DM14855P1 | 0.42861846 | -1.2607757 | 1.0312597  | -1.0861588 |                             |
| DM00374P1 | 0.42864433 | 1.5741194  | 1.6426034  | -1.0734756 | VARS XM_001855829.1         |
| DM09250P3 | 0.42888153 | -1.06567   | 1.0089017  | 1.3489225  |                             |
| DM13809P2 | 0.42891747 | -1.3780427 | -1.2483162 | 1.0156761  |                             |
| DM00270P1 | 0.4290071  | 1.0464748  | -1.1630439 | -1.1708493 | DWIL\GK172: XM_002061817.1  |
| DM13396P1 | 0.42902374 | -1.0668148 | -1.0326283 | 1.0927916  |                             |
| DM12573P2 | 0.42944282 | 1.1566954  | 1.0597737  | -1.0364813 |                             |
| DM04501P3 | 0.4295453  | -1.3359965 | -1.2802217 | -1.249193  | AGAP_AGAP0 XM_318686.3      |
| DM00644P1 | 0.42957607 | -1.0073802 | -1.0566219 | -1.2124712 | LOC1001663: XM_001946703.1  |
| DM01146P3 | 0.429583   | 1.0192786  | 1.1530182  | 1.0047276  | LOC411122 XM_394596.3       |
| DM06704P2 | 0.4295923  | 1.2079386  | 1.4302307  | 1.121388   |                             |
| DM08364P1 | 0.4296598  | -1.0295526 | -1.7841218 | 1.3689489  |                             |
| DM15343P3 | 0.4297573  | -1.0777915 | -1.4132544 | 1.1022234  |                             |
| DM02586P1 | 0.4301908  | 1.2721746  | 1.1680244  | 1.3894295  | TFPI NM_001003243.1         |
| DM13029P3 | 0.43034822 | -1.3453566 | -1.0969404 | 1.0557989  |                             |
| DM14581P1 | 0.43038422 | 1.1875718  | 1.1526648  | 1.1718549  |                             |
| DM12681P1 | 0.43050912 | 1.1519667  | 1.0568223  | -1.2221962 |                             |
| DM05451P2 | 0.43085825 | 1.0147011  | -1.022652  | 1.1198595  |                             |
| DM05028P3 | 0.43087858 | 1.142257   | 1.0976385  | -1.0257257 |                             |
| DM06576P3 | 0.43089777 | -1.1786026 | -1.1251872 | -1.1990159 |                             |
| DM09040P2 | 0.4309288  | 1.1197014  | -1.148557  | -1.0109727 |                             |
| DM09334P3 | 0.4309501  | 1.0296146  | -1.0795808 | -1.1822757 |                             |
| DM03235P2 | 0.43099487 | 1.2329862  | 1.0723147  | 1.081504   |                             |

|           |            |            |            |            |             |                |
|-----------|------------|------------|------------|------------|-------------|----------------|
| DM06095P2 | 0.4312052  | 1.3025911  | -1.0464454 | 1.0281128  |             |                |
| DM15071P2 | 0.4312568  | 1.1047109  | 1.0339795  | 1.3360603  |             |                |
| DM08562P1 | 0.4312952  | 1.1246628  | 1.081527   | 1.4113084  | ARID1B      | XM_518822.2    |
| DM06564P1 | 0.431359   | -1.4955697 | -1.2403605 | -1.383903  |             |                |
| DM07778P3 | 0.43137276 | 1.071896   | 1.0863761  | -1.0439302 |             |                |
| DM09770P1 | 0.43137375 | -1.0208075 | -1.2013229 | -1.1333207 |             |                |
| DM12500P2 | 0.43140012 | 1.013678   | -1.0155028 | 1.1179419  |             |                |
| DM02426P2 | 0.43151745 | 1.0206996  | 1.2243427  | 1.0231105  | LOC551401   | XM_623795.1    |
| DM06789P3 | 0.4316238  | 1.0775425  | -1.2441491 | 1.2999691  |             |                |
| DM04788P3 | 0.4316486  | 1.0074077  | -1.0268883 | -1.205568  |             |                |
| DM02286P2 | 0.4316653  | 1.0085106  | 1.0092107  | 1.0516758  |             |                |
| DM06899P2 | 0.43169886 | 1.0611244  | 1.1608584  | 1.2331326  |             |                |
| DM05668P4 | 0.43170023 | 1.2422619  | 1.0986383  | 1.3075612  |             |                |
| DM09296P1 | 0.43179917 | -1.0163103 | -1.0968056 | 1.1133324  |             |                |
| DM01177P2 | 0.43181646 | 1.2143314  | 1.106188   | 1.1473528  | POPTRDRAFT  | XM_002307652.1 |
| DM04199P3 | 0.43210375 | 1.2211777  | -1.0644106 | -1.3022003 |             |                |
| DM06847P2 | 0.43213326 | 1.1135525  | 1.1313094  | 1.37575    |             |                |
| DM12755P1 | 0.43229657 | 1.5357317  | 1.1973053  | 2.1691666  |             |                |
| DM14034P3 | 0.43244362 | -1.0784929 | -1.0245107 | 1.2021476  |             |                |
| DM10261P2 | 0.43246228 | -1.123232  | -1.2472459 | -1.080978  |             |                |
| DM05831P3 | 0.43250364 | -1.0403259 | 1.0229347  | -1.0411888 | DWIL\GK159  | XM_002063924.1 |
| DM05292P3 | 0.4325736  | 1.1991258  | 1.4232637  | -1.0633996 |             |                |
| DM05313P3 | 0.4326082  | 1.3376853  | 1.2613612  | 1.1569326  |             |                |
| DM06206P1 | 0.4328064  | 1.0214038  | -1.047462  | 1.1444299  |             |                |
| DM03352P1 | 0.43281516 | -1.0703881 | 1.169037   | -1.0709945 | SNRPA1      | XM_843830.1    |
| DM04434P4 | 0.43289545 | -1.1479737 | -1.0439872 | -1.0567133 |             |                |
| DM00242P1 | 0.4329977  | 1.0548024  | -1.0004845 | -1.1552148 | UBE2F       | NM_080678.1    |
| DM06401P4 | 0.43301597 | -1.1248063 | 1.1562384  | 1.166792   | DMOJ\GI120  | XM_002008065.1 |
| DM14119P4 | 0.43321627 | -1.0894777 | 1.2028224  | -1.0382372 |             |                |
| DM11074P4 | 0.43323183 | -1.0140809 | 1.1405678  | -1.0303432 |             |                |
| DM09125P2 | 0.43335205 | 1.0571647  | -1.2898151 | 1.0711662  |             |                |
| DM02727P3 | 0.4333643  | 1.0928485  | 4.3543816  | 1.2277397  |             |                |
| DM02819P1 | 0.43339    | -1.0972836 | -1.3252537 | 1.1269897  | LOC763367   | XM_001199309.1 |
| DM00750P2 | 0.43342462 | 1.1067761  | -1.1956661 | -1.3147091 | GLI         | XM_396706.2    |
| DM03110P3 | 0.43351644 | -1.030079  | 1.4842117  | 1.069188   | LOC1000266  | XM_001370655.1 |
| DM07866P3 | 0.43362367 | 1.1620431  | 1.0048265  | 1.1233956  |             |                |
| DM06986P3 | 0.4337029  | -1.0544742 | 1.2883776  | 1.2128209  |             |                |
| DM05348P3 | 0.43412265 | -1.0098318 | 1.0322781  | -1.1177601 |             |                |
| DM08942P2 | 0.4342851  | -1.0643688 | 1.3328754  | 1.1814656  |             |                |
| DM04756P3 | 0.43436325 | -1.0110317 | -1.004761  | -1.1406709 |             |                |
| DM02821P3 | 0.4345351  | 1.0007343  | 1.1356244  | -1.0011412 | BRAFLDRAFT  | XM_002591587.1 |
| DM15014P3 | 0.43460312 | -1.0677255 | 1.2374489  | 1.1092577  |             |                |
| DM01304P2 | 0.4346614  | 1.0588984  | 1.1548319  | 1.0815074  | GOT1        | NM_001135449.2 |
| DM00529P2 | 0.43469745 | 1.1049302  | -1.0534718 | -1.0415365 | DPER\GL227  | XM_002024028.1 |
| DM03975P4 | 0.4348041  | -1.0555553 | -1.6370257 | 1.0924723  | DVIR\GJ1730 | XM_002051952.1 |
| DM11456P4 | 0.43480664 | -1.0913134 | -1.000945  | -1.0050548 |             |                |
| DM05363P3 | 0.43484017 | 1.0355599  | 1.0190735  | -1.0885818 |             |                |
| DM06821P2 | 0.4350459  | -1.1342221 | -1.095889  | 1.1027507  |             |                |
| DM14769P1 | 0.43508002 | -1.2391084 | -1.3864759 | -1.0980737 |             |                |
| DM06914P2 | 0.4351479  | 1.5416706  | 2.024857   | 1.0658975  | BRAFLDRAFT  | XM_002604417.1 |



|           |            |            |            |            |             |                |
|-----------|------------|------------|------------|------------|-------------|----------------|
| DM01385P3 | 0.43527004 | -1.1569606 | -1.204951  | -1.1224276 | LOC1000296  | XM_001379321.1 |
| DM03799P1 | 0.4353042  | 1.129659   | -1.0193148 | -1.0355198 |             |                |
| DM13760P1 | 0.43538654 | -1.0973649 | 1.0626663  | 1.128608   | DERE\GG183  | XM_001977149.1 |
| DM01665P1 | 0.43552938 | -1.089176  | -1.1254356 | -1.0161349 | LOC1001206  | XM_001604184.1 |
| DM08921P3 | 0.43558854 | -1.2226918 | 1.0043015  | 1.0278407  |             |                |
| DM05166P1 | 0.4357248  | -1.0885543 | -1.0664507 | -1.0009142 |             |                |
| DM11344P3 | 0.43578142 | 1.1437817  | 1.037587   | -1.0902195 |             |                |
| DM00530P4 | 0.4358099  | 1.1331618  | 1.1438469  | 1.1614531  | CCNB3       | NM_001140296.1 |
| DM05068P3 | 0.435815   | -1.1236511 | -1.0628463 | -1.1429431 |             |                |
| DM03470P3 | 0.43582067 | -1.077329  | -1.0912573 | -1.2869794 | SEC13       | NM_024206.4    |
| DM12170P3 | 0.43585736 | 1.0720081  | -2.0085106 | 1.2260146  |             |                |
| DM14115P3 | 0.4360855  | -1.157864  | 1.0936416  | 1.0904635  |             |                |
| DM01261P3 | 0.43612573 | -1.0560079 | -1.3606097 | -1.5259886 |             |                |
| DM03207P2 | 0.43612847 | -1.0660585 | -1.0985398 | -1.0347153 |             |                |
| DM05650P3 | 0.43635532 | -1.2839986 | -1.0868661 | 1.0267278  |             |                |
| DM08458P1 | 0.4363948  | -1.0564173 | -1.0103719 | -1.1300526 |             |                |
| DM03290P1 | 0.43679243 | 1.1268613  | -1.119361  | 1.1267388  | LOC1001234  | XM_001607040.1 |
| DM09474P1 | 0.43684095 | 1.067103   | -1.2217684 | -1.126782  |             |                |
| DM07561P1 | 0.4368908  | 1.0559512  | 1.0906476  | 1.127002   |             |                |
| DM11114P3 | 0.43700504 | 1.0525495  | 1.0446839  | -1.2775279 |             |                |
| DM12657P3 | 0.43706256 | -1.0929471 | -1.1185938 | -1.0815307 |             |                |
| DM03234P3 | 0.43714395 | -1.1341717 | 1.0393666  | -1.0873541 | BRAFLDRAFT  | XM_002593837.1 |
| DM00940P2 | 0.43745863 | 1.3997273  | 1.2439109  | 1.2247127  | NEMVEDRAFT  | XM_001628059.1 |
| DM06883P1 | 0.43757805 | -1.25671   | -1.041952  | 1.1667225  |             |                |
| DM06152P2 | 0.4377678  | -1.0204684 | -1.0632964 | -1.0982212 | LOC1001140  | XM_001600497.1 |
| DM14202P4 | 0.437853   | -1.025506  | -1.1166786 | 1.1568148  |             |                |
| DM06993P4 | 0.4380058  | -1.0396017 | -1.0172664 | -1.4857777 |             |                |
| DM02906P1 | 0.43818    | 1.0917853  | -1.017617  | 1.0059011  |             |                |
| DM05362P4 | 0.43828917 | 1.0447443  | -1.078459  | -1.004573  | PCMT1       | NM_001030445.1 |
| DM09330P1 | 0.43848166 | -1.146449  | -1.1766537 | -1.1287953 |             |                |
| DM06813P2 | 0.4385493  | -1.0665476 | -1.547581  | 1.0008432  |             |                |
| DM02119P1 | 0.4386148  | -1.0372168 | -1.0260117 | -1.184561  | TIF213      | NM_001021805.1 |
| DM08594P1 | 0.43866655 | -1.0405856 | -1.0183468 | 1.0937469  |             |                |
| DM06265P1 | 0.43879756 | -1.2106134 | -1.3552096 | -1.1292126 |             |                |
| DM04123P1 | 0.4388221  | 1.0235136  | -1.1116589 | -1.0492407 | DWIL\GK140  | XM_002073271.1 |
| DM04765P2 | 0.43895432 | -1.2279721 | -1.5517937 | -1.0503819 |             |                |
| DM05316P1 | 0.4390185  | 1.1977046  | 1.1189574  | -1.2074383 |             |                |
| DM12656P1 | 0.4390591  | 1.2236966  | 1.135416   | 1.0720006  |             |                |
| DM04621P1 | 0.43908167 | -1.0415335 | -1.0181078 | 1.1604496  | CAMKII      | NM_001169362.1 |
| DM07323P4 | 0.43921277 | -1.0040487 | 1.0522265  | -1.2321508 |             |                |
| DM11373P4 | 0.4392465  | -1.076651  | -1.2277083 | -1.2202218 |             |                |
| DM00970P1 | 0.43934035 | 1.0972066  | 1.0204744  | -1.0041645 | DPSE\GA172  | XM_001358864.2 |
| DM04173P2 | 0.4394972  | 1.8738457  | 1.0867878  | -1.282206  |             |                |
| DM08344P1 | 0.43953964 | -1.050928  | -1.0128595 | 1.2663264  |             |                |
| DM01699P4 | 0.4398537  | 1.0642209  | 1.1209697  | -1.4821383 | ABAT        | XM_001656098.1 |
| DM12302P1 | 0.43987924 | 1.2168359  | 1.61574    | -1.2559813 |             |                |
| DM13973P1 | 0.43994546 | -1.1030436 | -1.0761031 | -1.1858104 |             |                |
| DM14493P1 | 0.44004035 | -1.1827052 | -1.2562677 | -1.2327132 |             |                |
| DM07748P1 | 0.4401445  | -1.069897  | -1.2143734 | -1.0202355 |             |                |
| DM03844P1 | 0.44023043 | -1.0046656 | 1.2175624  | 1.2690226  | DVIR\GJ1464 | XM_002051138.1 |

|           |            |            |            |            |                           |             |
|-----------|------------|------------|------------|------------|---------------------------|-------------|
| DM14384P1 | 0.4402786  | 1.3861425  | 1.3773749  | -1.0431783 |                           |             |
| DM09907P1 | 0.44041717 | -1.0701891 | 1.1031852  | 1.1152624  |                           |             |
| DM03756P3 | 0.44042996 | -1.0877928 | -1.153411  | -1.1105411 | BRAFLDRAFT_XM_002596776.1 |             |
| DM13902P1 | 0.44055188 | 1.061121   | 1.19569    | 1.0916715  |                           |             |
| DM02820P2 | 0.44058847 | -1.0324479 | -1.0828568 | 1.1255933  | TRIADDRAFT_XM_002108241.1 |             |
| DM06536P3 | 0.44063175 | 1.2213608  | -1.0388268 | -1.0077379 | DSEC\GM175_XM_002042688.1 |             |
| DM03869P1 | 0.44083378 | 1.1222416  | -1.1162645 | -1.0389951 |                           |             |
| DM02314P3 | 0.4413008  | -1.2595043 | -1.1149988 | 1.0413429  | DWIL\GK156_XM_002063936.1 |             |
| DM06342P1 | 0.4413014  | 1.0501202  | -1.1226546 | -1.0171825 |                           |             |
| DM06452P2 | 0.44130474 | -1.6398813 | -1.2718487 | -1.2291945 | T-CP1                     | NM_079726.3 |
| DM12919P2 | 0.44138116 | -1.005442  | 1.1883435  | 1.1297823  |                           |             |
| DM07442P3 | 0.44139394 | -1.1265651 | 1.0852841  | 1.0311128  |                           |             |
| DM08023P1 | 0.44156724 | -1.2862872 | -1.0758058 | 1.1993195  |                           |             |
| DM12307P1 | 0.44166082 | -1.0926923 | -1.042253  | 1.0062639  |                           |             |
| DM09930P1 | 0.44166455 | 1.1029688  | 1.7132933  | -1.2842886 |                           |             |
| DM09512P3 | 0.44173726 | -1.0068065 | 1.0726626  | -1.1729999 |                           |             |
| DM09001P1 | 0.441862   | 1.0881499  | -1.0867369 | -1.0574586 |                           |             |
| DM00424P2 | 0.441887   | -1.0225525 | -1.0365288 | -1.086639  | CAD                       | NM_023525.1 |
| DM14386P1 | 0.4420017  | -1.1299523 | -1.0890404 | 1.0078938  |                           |             |
| DM03802P1 | 0.44209078 | -1.0869247 | 1.0416403  | -1.0454588 | ISCW_ISWC_XM_002401506.1  |             |
| DM02877P2 | 0.44241908 | -1.2769802 | -1.267493  | -1.1561162 |                           |             |
| DM03962P1 | 0.44259855 | -1.149439  | 1.0291607  | -1.2134432 |                           |             |
| DM03270P3 | 0.4428446  | -1.0748225 | -1.0721887 | 1.0107561  | AGAP_AGAP0_XM_316844.4    |             |
| DM08960P1 | 0.44303465 | -1.1391114 | -1.0360343 | 1.0419328  |                           |             |
| DM01204P1 | 0.44325873 | -1.1766149 | -1.0946801 | -1.1245826 | DERE\GG229_XM_001976532.1 |             |
| DM14378P2 | 0.4432619  | -1.0519855 | -1.2491477 | -1.3680325 |                           |             |
| DM05094P2 | 0.44336557 | 1.0382572  | 1.1599683  | -1.0351547 |                           |             |
| DM06790P1 | 0.44339857 | -1.2339933 | -1.3889226 | -1.346016  |                           |             |
| DM07592P3 | 0.44345564 | 1.0407364  | -1.1107088 | -1.213238  |                           |             |
| DM14528P3 | 0.44347164 | -1.1381177 | -1.0279952 | 1.1000496  |                           |             |
| DM10960P3 | 0.44348723 | 1.8670615  | 1.9586833  | 1.1175668  |                           |             |
| DM03193P4 | 0.4436269  | 1.0523274  | 1.0372161  | 1.111104   | LOC1000663_XM_001496073.1 |             |
| DM04259P2 | 0.44364923 | 1.1065812  | 1.0904748  | 1.4122685  |                           |             |
| DM12236P1 | 0.4436508  | 1.2531458  | 1.4790268  | 1.2637271  |                           |             |
| DM10008P3 | 0.44370595 | -1.0860369 | 1.1407727  | -1.1339009 |                           |             |
| DM05694P1 | 0.4437822  | 1.0311372  | 1.0467074  | -1.2054296 |                           |             |
| DM12041P1 | 0.44411546 | 1.0087479  | -1.0909446 | 1.0986776  |                           |             |
| DM11496P3 | 0.4441912  | 1.0841832  | -1.3366106 | -1.0412383 |                           |             |
| DM11544P1 | 0.44424063 | -1.0601702 | -1.000436  | 1.0591931  |                           |             |
| DM09874P3 | 0.4443221  | -1.1050171 | 1.0288622  | 1.0074861  |                           |             |
| DM07035P3 | 0.44441903 | 1.0260645  | 1.3619765  | 1.2831728  |                           |             |
| DM13294P2 | 0.44443366 | -1.0718287 | -1.0025853 | 1.013739   |                           |             |
| DM01556P2 | 0.44445303 | -1.0038009 | -1.0027497 | -1.0469725 |                           |             |
| DM04880P1 | 0.44450626 | -1.148296  | -1.2055247 | -1.1645614 |                           |             |
| DM11694P3 | 0.44471222 | -1.1722958 | -1.3362747 | -1.3119563 |                           |             |
| DM11264P1 | 0.44473597 | -1.0584484 | -1.1604875 | -1.0044606 |                           |             |
| DM08282P2 | 0.44479197 | -1.0339231 | 1.0803332  | 1.1234243  |                           |             |
| DM04680P3 | 0.44480997 | 1.0654975  | 1.0049272  | -1.0640956 | LOC725319_XM_001121179.1  |             |
| DM13497P2 | 0.44484958 | 1.0752941  | -1.0617311 | -1.2825874 |                           |             |
| DM15098P1 | 0.44502714 | 1.040369   | -1.0403211 | 1.1678175  |                           |             |

|           |            |            |            |            |             |                |
|-----------|------------|------------|------------|------------|-------------|----------------|
| DM09112P1 | 0.4452883  | 1.2608998  | 1.0797496  | 1.2096276  |             |                |
| DM04590P2 | 0.44532117 | -1.0766416 | -1.1882962 | -1.112299  | RGL         | NM_079958.2    |
| DM00837P3 | 0.44540617 | 1.027591   | 1.1007756  | 1.0550199  | BM1_27545   | XM_001896925.1 |
| DM11238P3 | 0.44551116 | 1.0702701  | -1.1221477 | -1.0680165 | LOC1002177: | XM_002189127.1 |
| DM08762P1 | 0.44555354 | -1.0196598 | -1.0257531 | 1.2743788  |             |                |
| DM04886P2 | 0.44566116 | -1.0557274 | -1.0576848 | -1.0640898 |             |                |
| DM00788P3 | 0.44567165 | -1.0439813 | -1.0833237 | 1.0037311  | LOC1001610  | XM_001944502.1 |
| DM00646P2 | 0.4460566  | 1.122444   | 1.0621924  | 1.0606287  | DVIR\GJ1812 | XM_002057389.1 |
| DM08709P2 | 0.4461028  | -1.0503353 | -1.1572129 | 1.0241449  |             |                |
| DM11192P4 | 0.4461129  | -1.119658  | -1.221299  | -1.1826587 |             |                |
| DM00698P2 | 0.4461149  | -1.1184852 | 1.0399168  | 1.1233177  | DVIR\GJ1812 | XM_002057393.1 |
| DM08779P2 | 0.44619697 | 1.854156   | 2.3236814  | 1.3095415  | RPL19       | NM_001043756.4 |
| DM09210P3 | 0.4462884  | 1.0271544  | 1.6378108  | 1.0637687  |             |                |
| DM10338P1 | 0.44629258 | -1.1977452 | -1.1736863 | -1.5942566 |             |                |
| DM06866P3 | 0.44635367 | -1.1348456 | -1.0025823 | 1.0949242  |             |                |
| DM01723P1 | 0.4463634  | 1.0496266  | 1.1326985  | 1.2209345  | DGRI\GH228  | XM_001994985.1 |
| DM10480P2 | 0.44649234 | -1.0329922 | 1.1857195  | -1.395861  |             |                |
| DM07333P3 | 0.44653141 | 1.0478374  | 1.07561    | 1.0442963  | PKH_094500  | XM_002259441.1 |
| DM00092P3 | 0.4466362  | 1.0001862  | -1.1839774 | 1.0491594  |             |                |
| DM13058P2 | 0.44664374 | 1.0717369  | -1.0647571 | 1.169091   |             |                |
| DM01139P2 | 0.44665605 | 1.6004443  | -1.1041119 | 1.0180879  | LOC1000128  | XM_001367182.1 |
| DM08338P1 | 0.44674695 | -1.0836675 | 1.0224868  | 1.4270825  |             |                |
| DM05865P2 | 0.44678882 | -1.0248828 | -1.0995443 | -1.1238266 | DPYD        | NM_174041.2    |
| DM02988P3 | 0.44698834 | -1.0963358 | 1.0197586  | -1.0370585 |             |                |
| DM01550P1 | 0.44707054 | -1.1056336 | -1.0741488 | 1.0101912  | ATPSYN-BET  | XM_001656687.1 |
| DM11125P3 | 0.44710866 | -1.067109  | -1.4427128 | -1.2263291 |             |                |
| DM00227P2 | 0.44722545 | -1.2435764 | -1.0993924 | -1.3381542 | DANA\GF138  | XM_001961305.1 |
| DM10318P2 | 0.44727826 | -1.3669155 | -1.4012078 | 1.0221076  |             |                |
| DM08169P4 | 0.44742447 | 1.2985278  | 1.5465858  | 1.7964814  |             |                |
| DM02038P1 | 0.44756377 | 1.4300627  | 1.9387258  | 1.002685   |             |                |
| DM06774P2 | 0.4475735  | -1.5903751 | -1.3603519 | -1.4371064 |             |                |
| DM02627P2 | 0.44764125 | -1.1488186 | 1.0447017  | 1.3444479  | SI          | NM_001082266.1 |
| DM03268P4 | 0.44769454 | 1.0639515  | -1.1845226 | -1.1451575 |             |                |
| DM00582P3 | 0.44777045 | -1.0122292 | -1.4402512 | -1.2549336 | LOC1001174  | XM_001601647.1 |
| DM06660P2 | 0.44811562 | -1.0622323 | 1.0041711  | -1.1402334 |             |                |
| DM11428P3 | 0.4484496  | 1.2668712  | 1.0780219  | -1.1610279 |             |                |
| DM13763P1 | 0.44846633 | -1.1838753 | -1.1369375 | 1.2616684  |             |                |
| DM13426P2 | 0.44853795 | 1.0708152  | -1.270347  | -1.0215659 |             |                |
| DM03258P3 | 0.44855228 | 1.1497804  | 1.0165827  | 1.0641015  | LOC583809   | XM_001192701.1 |
| DM08867P3 | 0.44860163 | -1.1861268 | -1.1019917 | -1.1578841 |             |                |
| DM10662P4 | 0.44869578 | 1.0342627  | 1.0891881  | -1.0257198 | TB927.7.717 | (XM_841244.1   |
| DM00839P4 | 0.44879967 | 1.2649192  | -1.0102041 | 1.1714864  | LOC1000818  | XM_001512529.1 |
| DM09198P3 | 0.44891715 | -1.0487338 | 1.1029058  | -1.1157465 |             |                |
| DM09133P1 | 0.44891736 | 1.1339313  | 1.4691513  | 1.0205321  |             |                |
| DM09692P3 | 0.44894025 | -1.0462373 | 1.1493784  | 1.1687217  |             |                |
| DM08181P1 | 0.4489488  | -1.0873369 | -1.0283808 | 1.1554722  |             |                |
| DM14114P2 | 0.44940493 | -1.2688184 | -1.0808629 | -1.3745193 |             |                |
| DM06601P3 | 0.4495765  | 1.1626086  | 1.1557531  | 1.1788661  |             |                |
| DM01129P1 | 0.4495813  | 1.1715044  | 1.0479872  | -1.1046886 | OSBPL11     | XM_853156.1    |
| DM09563P2 | 0.44959205 | 1.2821043  | 1.122777   | -1.0314085 |             |                |

|           |            |            |            |            |                            |
|-----------|------------|------------|------------|------------|----------------------------|
| DM07917P2 | 0.44969967 | 1.3181248  | -1.1361938 | 1.2290643  |                            |
| DM08025P1 | 0.44973177 | 1.0075388  | 1.119777   | 1.644688   |                            |
| DM11246P3 | 0.44981888 | -1.1224482 | -1.0604011 | -1.2533691 |                            |
| DM03063P4 | 0.44988766 | -1.0387526 | 1.0223175  | -1.062454  | DYAK\GE190\XM_002089282.1  |
| DM06537P1 | 0.4500769  | -1.0050416 | -1.2294432 | 1.3203472  |                            |
| DM02198P3 | 0.45010403 | -1.1444521 | -1.1621594 | 1.0170441  |                            |
| DM00035P2 | 0.45012897 | -1.1643926 | -1.0786482 | -1.2296485 | TRIADDRAFT_XM_002110196.1  |
| DM03316P1 | 0.45013097 | -1.3406543 | -1.0083653 | -1.080349  | DWIL\GK244\XM_002066602.1  |
| DM13409P1 | 0.4501886  | -1.0985848 | -1.1081458 | 1.0951376  |                            |
| DM00909P3 | 0.45033923 | -1.2032906 | -1.1259898 | -1.134771  | IDH XM_001650625.1         |
| DM00277P1 | 0.45045617 | -1.1357492 | -1.163695  | -1.0302157 | DPSE\GA208\XM_001362050.2  |
| DM04588P2 | 0.4505817  | 1.0706491  | 1.2626162  | 1.1765716  |                            |
| DM00143P1 | 0.4506214  | 1.013315   | -1.0739225 | -1.3307056 | DVIR\GJ2217 XM_002050441.1 |
| DM09429P1 | 0.45064238 | 1.166488   | -1.1468208 | -1.4398489 |                            |
| DM06427P1 | 0.45068407 | -1.1500938 | -1.5002279 | -1.0150092 |                            |
| DM07060P1 | 0.45069626 | 1.1021373  | -1.0640005 | -1.0214324 |                            |
| DM13109P3 | 0.45076513 | -1.0573812 | -1.4749243 | -1.1558734 | AAEL_AAELOC XM_001655217.1 |
| DM14033P2 | 0.4507925  | -1.1344544 | -1.1099714 | -1.0977292 |                            |
| DM01532P1 | 0.45086774 | -1.1463766 | -1.2186408 | -1.3616513 | LOC1001214\XM_001605031.1  |
| DM06270P1 | 0.45087555 | -1.2527839 | -1.0720253 | -1.0683196 |                            |
| DM04668P3 | 0.45094723 | -1.0579165 | 1.1362898  | 1.357973   |                            |
| DM09459P1 | 0.45104268 | 1.0778378  | 1.0093309  | -1.2565202 |                            |
| DM07946P1 | 0.45157573 | -1.0826598 | -1.0077773 | -1.1193118 |                            |
| DM14284P1 | 0.45159492 | 1.2260174  | 1.2820607  | 1.233471   |                            |
| DM07719P2 | 0.4516705  | 1.0065373  | 4.220605   | 1.1071217  |                            |
| DM09915P1 | 0.45170987 | -1.0845412 | -1.2443483 | -1.1186215 |                            |
| DM01677P2 | 0.45174366 | -1.1161733 | -1.0000466 | 1.0337663  | DMOJ\GI116\XM_002008745.1  |
| DM04243P2 | 0.45180902 | -1.11623   | -1.0129768 | -1.0994828 |                            |
| DM11975P3 | 0.45181623 | -1.0259887 | -1.0085101 | -1.1050084 |                            |
| DM05866P2 | 0.4519336  | -1.0492076 | 1.0475729  | 1.1306362  | LOC661233 XM_967408.2      |
| DM14847P1 | 0.452068   | -1.0259706 | -1.0881112 | 1.1440973  |                            |
| DM04981P1 | 0.45222723 | -1.0791131 | 1.0122086  | 1.0510317  |                            |
| DM01669P3 | 0.45226446 | -1.0677067 | -1.1001886 | 1.1039634  | DSEC\GM103 XM_002041434.1  |
| DM12094P1 | 0.45246693 | -1.0218148 | -1.2220911 | -1.1941669 |                            |
| DM10869P2 | 0.45247796 | 1.0346531  | 1.1150889  | -1.1398171 |                            |
| DM02600P1 | 0.45251498 | -1.0852488 | -1.153749  | 1.018031   | DSEC\GM265 XM_002032340.1  |
| DM14483P1 | 0.4525386  | -1.0255033 | 1.0433666  | -1.0248643 |                            |
| DM08824P1 | 0.45258683 | -1.035648  | 1.243669   | -1.0486544 |                            |
| DM04721P2 | 0.45322683 | 1.0000488  | 1.009833   | 1.1220784  |                            |
| DM03931P3 | 0.45334926 | 1.3643869  | 1.136768   | 1.3089986  | PB103351.00 XM_666562.1    |
| DM03105P3 | 0.45344365 | 1.1556431  | 1.1536976  | 1.0926104  | ACSBG1 NM_001128023.1      |
| DM13000P2 | 0.45347032 | 1.0224726  | 1.0769013  | -1.130614  |                            |
| DM06748P1 | 0.45366335 | 1.0728036  | -1.0437076 | -1.0107422 |                            |
| DM03259P1 | 0.45367417 | 1.1111157  | 1.1351575  | 1.0044234  | DGRI\GH222\XM_001996243.1  |
| DM00375P2 | 0.45411596 | -1.007645  | -1.0400077 | -1.0548728 | BM1_05170 XM_001892474.1   |
| DM08027P3 | 0.45420885 | 1.3054382  | 1.6422569  | 1.651963   |                            |
| DM12875P1 | 0.45433185 | -1.1098515 | -1.2666951 | -1.2459097 |                            |
| DM11955P4 | 0.45435512 | 1.1865759  | 1.201778   | 1.0098028  | TBX15 NM_153664.1          |
| DM05826P3 | 0.4543864  | 1.0402907  | 1.1687067  | 1.2564256  |                            |
| DM08540P3 | 0.45453474 | 1.1498196  | 1.2373908  | 1.1239209  |                            |

|           |            |            |            |            |             |                 |
|-----------|------------|------------|------------|------------|-------------|-----------------|
| DM13709P1 | 0.4546038  | 1.0607079  | -1.1934818 | 1.1591767  | LOC661917   | XM_968047.2     |
| DM11758P1 | 0.45476863 | -1.0995525 | 1.007995   | 1.0028269  |             |                 |
| DM10390P2 | 0.45494413 | 1.2649457  | 1.0296825  | -1.0431579 |             |                 |
| DM08773P1 | 0.45498088 | 1.1023352  | 1.0975932  | -1.1928711 |             |                 |
| DM09886P1 | 0.4550566  | 1.0012594  | 1.68922    | -1.1025715 | MDH2        | NM_031151.2     |
| DM06008P3 | 0.45512712 | 1.0470432  | 1.0897317  | -1.0991757 |             |                 |
| DM08528P1 | 0.455189   | 1.2271721  | 1.0452135  | 1.2560058  |             |                 |
| DM00771P1 | 0.4552155  | -1.111781  | 1.1271747  | -1.022601  | DUT         | NM_001079488.1  |
| DM14435P3 | 0.4552794  | 1.1056801  | -1.2618397 | -1.0908303 | LOC1003015  | (NM_001160204.1 |
| DM02712P3 | 0.4552973  | -1.1478522 | -1.0113367 | 1.1941311  |             |                 |
| DM04739P4 | 0.45534754 | 1.2180035  | 1.2047175  | 1.0880007  |             |                 |
| DM01374P1 | 0.45543453 | 1.0275916  | 1.0619673  | -1.2582222 | AGAP_AGAP0  | XM_317149.4     |
| DM01896P4 | 0.45555654 | 1.1470463  | 1.1588147  | 1.3312497  | LOC1001748  | (NM_001130902.1 |
| DM13041P1 | 0.4557021  | 1.0315039  | -1.018885  | 1.121427   |             |                 |
| DM00893P2 | 0.45579156 | -1.0227358 | -1.0368026 | 1.0311431  |             |                 |
| DM01059P3 | 0.4558861  | -1.2189583 | -1.0998721 | -1.0592933 | HSP90AA1    | NM_001163955.1  |
| DM11408P1 | 0.4560814  | -1.0656295 | -1.3435307 | -1.0269216 | LOC1001192  | (XM_001603018.1 |
| DM03106P1 | 0.45611942 | -1.1692537 | -1.0996909 | -1.2183505 | DPER\GL179  | (XM_002024751.1 |
| DM04052P2 | 0.45619628 | 1.3004332  | 1.3296932  | 1.0809147  |             |                 |
| DM11048P2 | 0.45630553 | -1.1055274 | -1.1347879 | -1.1389258 |             |                 |
| DM12800P1 | 0.4563691  | -1.0033937 | 1.08743    | 1.0741647  |             |                 |
| DM09297P1 | 0.45638904 | 1.4165276  | 1.3079302  | 1.3001046  |             |                 |
| DM04427P3 | 0.4564498  | 1.1687986  | 1.0017718  | 1.5076327  |             |                 |
| DM09780P1 | 0.45650396 | 1.0416765  | -1.0403358 | -1.0701975 |             |                 |
| DM12091P3 | 0.4565571  | 1.1627998  | 1.0180197  | 1.0704886  |             |                 |
| DM00238P2 | 0.4566769  | -1.0046384 | -1.2153053 | -1.1164309 | DWIL\GK119  | (XM_002070205.1 |
| DM00072P2 | 0.45669097 | 1.0512842  | -1.0238919 | -1.1110424 | DEHA2F0382  | (XM_460533.1    |
| DM06138P1 | 0.4567685  | 1.1484286  | 1.0099992  | -1.1476839 |             |                 |
| DM01376P3 | 0.45682487 | -1.18735   | -1.1929736 | -1.0570301 | DSIM\GD171  | XM_002106823.1  |
| DM08969P2 | 0.45688206 | 1.4390839  | 1.2732315  | 1.0236028  |             |                 |
| DM00654P2 | 0.45703393 | -1.0926167 | -1.0579746 | -1.0412076 | GMPS        | NM_001006556.1  |
| DM11001P2 | 0.4570704  | -1.2691733 | 1.0571146  | -1.3044113 |             |                 |
| DM00775P1 | 0.45724145 | -1.0969493 | -1.1183969 | -1.0231566 | LOC1000156  | (XM_001365698.1 |
| DM11168P2 | 0.45746434 | -1.0955852 | 1.0503551  | -1.0232286 | DPSE\GA105  | (XM_001355309.1 |
| DM02114P1 | 0.45806038 | -1.1155057 | -1.0504009 | -1.1316468 | DGRI\GH224  | (XM_001993953.1 |
| DM08743P1 | 0.45822826 | -1.0984155 | 1.0210494  | 1.00744    |             |                 |
| DM00323P3 | 0.4584698  | -1.0986589 | 1.2916282  | -1.0084989 | NADSYN      | XM_001657847.1  |
| DM12519P1 | 0.458514   | 1.0757136  | -1.1888541 | 1.0231454  |             |                 |
| DM03506P1 | 0.4586495  | 1.2212656  | 1.2209469  | 1.2164438  |             |                 |
| DM04008P2 | 0.4588399  | 1.2724742  | 1.2856648  | 1.0860736  |             |                 |
| DM05743P3 | 0.4588613  | -1.0476274 | 1.0270339  | -1.1336887 |             |                 |
| DM09292P1 | 0.45887542 | -1.0285673 | -1.0081688 | -1.0086374 |             |                 |
| DM10737P2 | 0.45902187 | -1.0697386 | -1.0925355 | -1.0941368 |             |                 |
| DM03517P1 | 0.45908892 | 1.0493263  | -1.1404122 | 1.0509131  | PRKACB      | NM_001087227.1  |
| DM05455P3 | 0.45910954 | 1.0028496  | 1.0118587  | 1.1970305  |             |                 |
| DM06522P3 | 0.45911762 | -1.4057082 | -1.3946321 | -1.402362  |             |                 |
| DM13467P3 | 0.45912308 | -1.0664694 | 1.1506968  | 1.0805477  |             |                 |
| DM11005P2 | 0.45923683 | -1.1188517 | 1.4719335  | 1.1001341  | MGL_4172    | XM_001728641.1  |
| DM10079P1 | 0.45938173 | -1.0948321 | -1.0735271 | 1.0497876  |             |                 |
| DM00216P1 | 0.45939586 | 1.1757035  | -1.1382445 | 1.1812708  | TB927.3.105 | (XM_838607.1    |

|           |            |            |            |            |            |                |
|-----------|------------|------------|------------|------------|------------|----------------|
| DM01743P3 | 0.459426   | 1.4374037  | 1.8426155  | 1.0445274  |            |                |
| DM06603P3 | 0.4595606  | 1.1506623  | 1.2566236  | 1.0444237  | LOC1001657 | NM_001134286.1 |
| DM11270P4 | 0.45966694 | -1.0482242 | -1.1304505 | -1.3294159 |            |                |
| DM04135P4 | 0.4597015  | 1.0876285  | -1.2607957 | -1.405982  |            |                |
| DM05067P3 | 0.4598463  | -1.2019584 | 1.0582504  | -1.2214652 |            |                |
| DM02131P1 | 0.45987177 | 1.0049595  | -1.0879884 | -1.0882062 |            |                |
| DM05553P1 | 0.4598722  | 1.4018878  | 1.6462636  | 1.0172222  | LOC1001657 | NM_001134286.1 |
| DM11440P3 | 0.4598734  | 1.2444326  | -1.046952  | -1.0586982 |            |                |
| DM02400P1 | 0.46007365 | -1.0433935 | 1.0253694  | -1.0998682 | RACG       | XM_001647742.1 |
| DM03638P2 | 0.46010703 | 1.2014927  | 1.3632448  | -1.092027  | DPEP1      | NM_214108.1    |
| DM07263P2 | 0.46010783 | -1.2692573 | -1.5136918 | 1.0999875  |            |                |
| DM07622P3 | 0.46012178 | 1.6631303  | 1.6207967  | 1.3512406  |            |                |
| DM01935P3 | 0.4602282  | -1.1595294 | 1.10309    | -1.1363931 | DANA\GF180 | XM_001954010.1 |
| DM10347P1 | 0.46022883 | 1.0764377  | 1.29723    | -1.1721567 |            |                |
| DM02518P1 | 0.46024987 | -1.0308214 | -1.1684891 | -1.0830479 | FECH       | XM_001650796.1 |
| DM11064P1 | 0.46036583 | -1.1208527 | -1.1337118 | -1.0665531 | LOC1001159 | XM_001606275.1 |
| DM00478P2 | 0.46043503 | 1.1655588  | 1.023474   | 1.0716447  | DYAK\GE202 | XM_002094252.1 |
| DM00059P1 | 0.4604994  | 1.1678277  | -1.112574  | 1.0902706  | ACADS      | NM_001142870.1 |
| DM02999P4 | 0.46055546 | -1.1081407 | 1.0572     | -1.1368859 | LOC412349  | XM_395810.3    |
| DM09861P3 | 0.4605569  | 1.0420406  | 1.114573   | -1.0252035 |            |                |
| DM00702P1 | 0.46090356 | -1.1643977 | -1.2247998 | -1.1522462 | PXDN       | XM_001503042.1 |
| DM00902P2 | 0.4609392  | 1.0126023  | -1.0033628 | -1.0850675 | NEMVEDRAFT | XM_001628053.1 |
| DM13653P1 | 0.46100846 | 1.1343746  | 1.8645287  | 1.2823036  |            |                |
| DM06064P1 | 0.46115574 | 1.2328522  | 1.1599275  | 1.2742803  | DYAK\GE230 | XM_002086241.1 |
| DM06625P1 | 0.46118593 | 1.0182955  | -1.2107495 | 1.0027766  |            |                |
| DM04220P4 | 0.46122056 | 1.0948896  | -1.5261208 | 1.0328809  |            |                |
| DM07398P4 | 0.46139404 | -1.0117108 | -1.1415555 | -1.0404619 |            |                |
| DM07463P4 | 0.46159673 | -1.0671215 | -1.0141109 | -1.3080264 |            |                |
| DM00897P3 | 0.46160263 | 1.0015073  | 1.1105065  | -1.1318653 | WBSCR22    | NM_001091900.1 |
| DM05702P1 | 0.46164417 | 1.0602702  | -1.1261659 | 1.1374413  |            |                |
| DM09319P2 | 0.46172813 | 1.1759298  | -1.1458192 | -1.0442685 |            |                |
| DM06700P1 | 0.46201488 | -1.014489  | -1.1295992 | -1.0647593 |            |                |
| DM09811P2 | 0.46217555 | 1.1739318  | 1.3311164  | 1.322975   |            |                |
| DM14974P1 | 0.46218407 | -1.0237421 | 1.1076659  | 1.2060785  |            |                |
| DM02859P1 | 0.46220964 | 1.0097166  | -1.1287565 | -1.1529902 | LOC1000157 | XM_001365578.1 |
| DM00923P2 | 0.46232307 | -1.0642673 | -1.1182373 | -1.1290272 | THO2       | XM_001653774.1 |
| DM05544P2 | 0.46236366 | 1.039031   | 1.042633   | 1.1781096  |            |                |
| DM07005P1 | 0.46237198 | -1.2035242 | -1.1314605 | -1.021362  |            |                |
| DM10203P2 | 0.46242678 | 1.1644819  | 1.1314577  | 1.0023386  |            |                |
| DM04368P2 | 0.46249112 | 1.193011   | 1.0079159  | 1.2045873  |            |                |
| DM08460P1 | 0.46262044 | -1.1791381 | -1.0159351 | -1.5218468 |            |                |
| DM05111P3 | 0.46262205 | -1.1930599 | -1.0446476 | -1.2635745 |            |                |
| DM02975P1 | 0.46280012 | -1.1580205 | -1.0774492 | -1.0448843 | DPSE\GA215 | XM_001352414.2 |
| DM13624P1 | 0.4629961  | -1.128278  | -1.2312362 | -1.0361814 |            |                |
| DM04097P3 | 0.4633031  | 1.0405034  | 1.1298101  | 1.128166   |            |                |
| DM03667P2 | 0.4636594  | -1.1193169 | -1.1501988 | -1.2862164 |            |                |
| DM12430P4 | 0.46373504 | 1.2271137  | 1.1524414  | -1.0641404 |            |                |
| DM07338P1 | 0.46387047 | 1.1469493  | -1.1700686 | -1.1334494 |            |                |
| DM09233P1 | 0.4638845  | -1.2335657 | 1.1623287  | -1.0903763 |            |                |
| DM08125P3 | 0.46389487 | -1.0514568 | -1.0858247 | 1.2626115  |            |                |

|           |            |            |            |            |            |                |
|-----------|------------|------------|------------|------------|------------|----------------|
| DM08640P1 | 0.4639327  | -1.2771437 | -1.155607  | 1.1611936  |            |                |
| DM15056P1 | 0.4639329  | -1.0321875 | -1.1818674 | -1.1018041 |            |                |
| DM12015P1 | 0.4641542  | -1.0764097 | 1.1136707  | -1.0622994 |            |                |
| DM09251P1 | 0.46422806 | -1.0391431 | 1.0818628  | 1.0927305  |            |                |
| DM09365P1 | 0.4644983  | 1.1418109  | 1.2660435  | -1.0353675 |            |                |
| DM08149P1 | 0.46461374 | 1.0207517  | 1.2077944  | 1.1240355  |            |                |
| DM08395P2 | 0.46466464 | 1.2927815  | 1.1965405  | -1.1045278 |            |                |
| DM02810P1 | 0.46466523 | 1.4155816  | 1.8417538  | 1.0502586  |            |                |
| DM03084P2 | 0.46475014 | -1.1852803 | -1.0874406 | -1.065211  | SEM        | XM_001867523.1 |
| DM00805P1 | 0.46475768 | 1.2250786  | -1.0065448 | -1.0074122 | PTRG_01084 | XM_001931382.1 |
| DM03387P2 | 0.46476156 | -1.020597  | -1.0934504 | -1.1630272 |            |                |
| DM09172P2 | 0.46487293 | 1.2354624  | 1.1062232  | 1.4946343  |            |                |
| DM05849P4 | 0.46513426 | -1.1084119 | 1.1350491  | 1.050969   | PGGT1B     | NM_005023.3    |
| DM04557P3 | 0.46518478 | 1.1825048  | 1.095734   | 1.0877138  |            |                |
| DM13028P1 | 0.4652663  | 1.1555498  | 1.0752208  | 1.2340649  |            |                |
| DM06091P3 | 0.46539935 | -1.0754431 | -1.0590692 | -1.2569205 | LOC411100  | XM_394574.3    |
| DM11539P3 | 0.4654807  | -1.0896846 | -1.218194  | -1.3309352 |            |                |
| DM13755P1 | 0.46556526 | 1.1188327  | 1.1508309  | -1.0120066 |            |                |
| DM09137P3 | 0.46563295 | -1.081023  | -1.4840028 | -1.0008224 |            |                |
| DM04127P3 | 0.46570614 | -1.0701591 | -1.0317495 | 1.0306615  |            |                |
| DM06006P2 | 0.4658148  | -1.0945787 | -1.0917124 | -1.0180842 | LOC1000762 | XM_001507597.1 |
| DM02779P3 | 0.465815   | -1.0274352 | 1.020207   | 1.0127786  | GOT2       | XM_535278.2    |
| DM10988P1 | 0.46595308 | 1.002152   | 1.0515107  | -1.4411682 |            |                |
| DM07859P1 | 0.4659655  | -1.0144706 | 1.1053828  | 1.0865766  |            |                |
| DM10959P2 | 0.46604997 | 1.0496801  | 1.334508   | 1.1458232  |            |                |
| DM13390P3 | 0.46618256 | 1.1067544  | -1.1310041 | -1.0373508 |            |                |
| DM12747P3 | 0.46619868 | 1.1380322  | 1.0668355  | 1.0627515  |            |                |
| DM08652P3 | 0.46626887 | 1.1576362  | 1.0786237  | -1.0464487 |            |                |
| DM04140P1 | 0.46627906 | -1.0988835 | 1.132349   | -1.0975999 |            |                |
| DM04269P3 | 0.4663068  | -1.0792062 | 1.218086   | 1.1119635  |            |                |
| DM06683P2 | 0.46633556 | -1.0155323 | -1.1368555 | 1.1116246  |            |                |
| DM12703P3 | 0.4663515  | -1.0788296 | 1.052918   | -1.0708238 |            |                |
| DM13938P2 | 0.46636844 | 1.4364755  | 1.2667687  | 1.3649384  |            |                |
| DM12413P1 | 0.46642005 | 1.0319523  | 1.1066501  | -1.0774237 |            |                |
| DM11937P3 | 0.466456   | 1.2091969  | 1.0191121  | -1.2970405 |            |                |
| DM04217P1 | 0.466675   | 1.0695013  | -1.022973  | 1.1136574  | LOC1000310 | XM_001380353.1 |
| DM02401P2 | 0.46672094 | -1.1474575 | -1.0595659 | -1.009388  | LOC448984  | NR_002170.3    |
| DM08194P1 | 0.46675482 | -1.0546014 | -1.0245292 | 1.1077914  |            |                |
| DM06794P1 | 0.46677566 | 1.075511   | 1.7863199  | -1.3045733 |            |                |
| DM01869P3 | 0.4668753  | -1.0102655 | -1.1146277 | 1.2275603  | FADS       | XM_001656496.1 |
| DM04219P2 | 0.4669092  | -1.1105477 | -1.0374887 | 1.0757022  |            |                |
| DM02763P4 | 0.46699703 | -1.1688694 | -1.1273512 | 1.0947424  | DANA\GF157 | XM_001963026.1 |
| DM14216P2 | 0.4670289  | 1.2409912  | -1.0066928 | -1.1897476 |            |                |
| DM14324P1 | 0.4670926  | -1.1192569 | 1.1952355  | -1.5013664 | DGRI\GH209 | XM_001985696.1 |
| DM06469P1 | 0.4674003  | -1.0113661 | -1.1362638 | 1.1310072  |            |                |
| DM08925P1 | 0.4674471  | -1.0050492 | 1.0736842  | 1.0087264  |            |                |
| DM14423P1 | 0.46745118 | -1.023563  | -1.120462  | 1.107624   |            |                |
| DM01223P1 | 0.46745855 | 1.0886182  | -1.1751727 | 1.1784393  | DPER\GL259 | XM_002018717.1 |
| DM03272P1 | 0.4674606  | 1.2500749  | 1.1203151  | -1.1532638 |            |                |
| DM12459P3 | 0.46761122 | 1.0963748  | 1.1336733  | -1.2566943 |            |                |

|           |            |            |            |            |             |                |
|-----------|------------|------------|------------|------------|-------------|----------------|
| DM13638P1 | 0.46769503 | 1.0950887  | 1.0018173  | 1.0998667  |             |                |
| DM12055P1 | 0.4677482  | -1.0074854 | -1.0172526 | -1.121638  |             |                |
| DM01382P2 | 0.46818912 | -1.0661637 | -1.0192335 | -1.0912452 | MRPS10      | NM_001159988.1 |
| DM08831P1 | 0.4682544  | -1.0869629 | -1.111629  | -1.0957704 |             |                |
| DM00903P1 | 0.4682771  | 1.0332234  | 1.0189638  | -1.076281  | MACROD2     | NM_001105029.1 |
| DM09408P2 | 0.46832046 | -1.3077776 | -1.0248965 | -1.1176801 |             |                |
| DM08806P1 | 0.4684979  | -1.0087774 | 1.069411   | 1.1402954  |             |                |
| DM05850P1 | 0.46883136 | 1.3634586  | 1.0652921  | 1.1676947  |             |                |
| DM13334P1 | 0.46934465 | -1.2251334 | 1.1745747  | 1.1570499  |             |                |
| DM06517P1 | 0.46967828 | 1.4271334  | 1.3671955  | -1.0927644 |             |                |
| DM12789P2 | 0.46973014 | 1.130288   | 1.0934458  | -1.011617  |             |                |
| DM06959P1 | 0.46977177 | -1.0438318 | -1.1369464 | -1.15676   |             |                |
| DM04496P3 | 0.46995795 | -1.0982207 | -1.0719547 | -1.1815815 |             |                |
| DM05877P2 | 0.47007403 | -1.6796409 | -1.4084398 | -1.2840873 | DWIL\GK209  | XM_002061372.1 |
| DM02921P3 | 0.47009185 | -1.0923673 | -1.1154671 | -1.1146542 | CG33276     | NM_206296.2    |
| DM06331P1 | 0.47010827 | -1.1594056 | 1.0797037  | 1.118558   |             |                |
| DM07191P2 | 0.47014478 | 1.0386232  | -1.1187394 | -1.0436534 |             |                |
| DM07175P1 | 0.47023976 | 1.0576768  | 1.1297888  | 1.1616751  |             |                |
| DM15273P2 | 0.47030643 | -1.089545  | -1.2185872 | 1.0679259  |             |                |
| DM01101P1 | 0.47035444 | 1.3096899  | 1.2262228  | 1.2178705  | AAEL_AAELOC | XM_001650521.1 |
| DM09723P2 | 0.47036242 | 1.0468618  | 1.2323631  | 1.0922564  |             |                |
| DM09571P3 | 0.47039568 | -1.2004354 | -1.0485402 | -1.260919  |             |                |
| DM05936P3 | 0.47041908 | -1.204529  | -1.1564409 | -1.1051912 |             |                |
| DM11417P1 | 0.47047138 | 1.2589428  | -1.2302347 | 1.178046   |             |                |
| DM04717P1 | 0.47047222 | 1.1952426  | 1.0365489  | 1.5043167  |             |                |
| DM06930P1 | 0.47052085 | 1.1374319  | 1.1898345  | 1.0540192  | LOC1001657  | NM_001134286.1 |
| DM01100P1 | 0.4705662  | -1.0404061 | -1.109502  | -1.0766667 | LOC1001817  | XM_002120830.1 |
| DM00800P2 | 0.47071338 | -1.096531  | 1.1352586  | 1.0356529  | LOC1000185  | XM_001366344.1 |
| DM14234P1 | 0.47079343 | 1.0550165  | -1.3012064 | 1.1632792  |             |                |
| DM09597P1 | 0.470863   | 1.0230981  | 1.1495985  | 1.0170685  |             |                |
| DM15159P1 | 0.47089773 | -1.0881541 | -1.1683159 | -1.0175747 |             |                |
| DM12084P1 | 0.47090328 | 1.0853161  | 1.0614339  | 1.3757615  |             |                |
| DM01270P1 | 0.47112545 | 1.0479406  | -1.118508  | 1.0765477  | SPE1        | XM_001385745.1 |
| DM03367P1 | 0.47119015 | 1.1073844  | 1.0294455  | 1.0726732  | LOC409316   | XM_392833.3    |
| DM05569P2 | 0.4712068  | -1.0833176 | 1.0332967  | -1.0614456 |             |                |
| DM08968P2 | 0.47123906 | -1.0055714 | 1.0111501  | 1.0743725  |             |                |
| DM02207P2 | 0.4713278  | 1.2294631  | 1.0904785  | 1.1195854  | UROC1       | XM_414375.1    |
| DM01328P2 | 0.47182143 | -1.0384274 | -1.001557  | -1.0638719 | UM01449.1   | XM_752503.1    |
| DM11464P2 | 0.47184774 | 1.1545213  | 1.3512685  | 1.1262228  |             |                |
| DM09403P1 | 0.47194725 | -1.0682209 | -1.0161241 | -1.1104165 |             |                |
| DM13391P2 | 0.4719639  | -1.0563952 | -1.1154634 | 1.2386615  |             |                |
| DM02534P3 | 0.47214058 | 1.0184162  | 1.1209222  | -1.0564492 | AAEL_AAELOC | XM_001659493.1 |
| DM09151P2 | 0.47220987 | -1.2323153 | -1.4386529 | 1.1884993  |             |                |
| DM11425P3 | 0.47221297 | 1.0550605  | 1.3091224  | 1.0037123  |             |                |
| DM11596P2 | 0.47236353 | 1.0664403  | -1.0230315 | -1.1007098 |             |                |
| DM00765P3 | 0.47244132 | -1.1486418 | 1.0630432  | 1.0128748  | BRAFLDRAFT  | XM_002597258.1 |
| DM04814P1 | 0.4724946  | -1.055846  | 1.1670603  | 1.0826137  |             |                |
| DM02842P2 | 0.47268867 | -1.0329002 | 1.0329535  | -1.0692477 | PPM1A       | NM_001086897.1 |
| DM01437P2 | 0.4728243  | -1.1284642 | -1.1005485 | -1.0549475 | TRX1-LIKE1  | XM_623125.2    |
| DM03275P3 | 0.4729219  | -1.1729926 | -1.1045325 | -1.1888064 | DMOJ\GI200  | XM_002004566.1 |



|           |            |            |            |            |             |                |
|-----------|------------|------------|------------|------------|-------------|----------------|
| DM12046P1 | 0.4729472  | 1.1159761  | 1.0483531  | -1.0823501 |             |                |
| DM09989P1 | 0.47306788 | -1.1270938 | -1.1091058 | -1.0081192 |             |                |
| DM09613P3 | 0.47309175 | 1.0426733  | 1.1187321  | 1.2559459  |             |                |
| DM06406P3 | 0.47310084 | 1.0700465  | -1.3900913 | 1.2970611  |             |                |
| DM03770P1 | 0.47319928 | 1.0626589  | 1.1623182  | -1.0021057 | VPS36       | XM_395542.2    |
| DM04928P3 | 0.47320893 | -1.0139579 | -1.1492436 | -1.158154  |             |                |
| DM12017P1 | 0.47327837 | -1.0603017 | 1.0292282  | -1.0824052 |             |                |
| DM04429P2 | 0.47336096 | -1.081532  | -1.0424882 | -1.5419431 |             |                |
| DM10443P3 | 0.473376   | 1.0960715  | -1.1117651 | 1.0318668  |             |                |
| DM07418P3 | 0.4737731  | -1.4219934 | -1.3208777 | -1.1552938 |             |                |
| DM09691P3 | 0.47377846 | -1.1684489 | 1.5016243  | 1.1314185  |             |                |
| DM09903P2 | 0.4737931  | 1.0472001  | -1.1233329 | -1.0774282 |             |                |
| DM07851P2 | 0.473831   | 1.0469925  | -1.032613  | -1.149336  |             |                |
| DM10787P1 | 0.47391656 | 1.1187013  | 1.3003724  | 1.1995944  |             |                |
| DM05459P3 | 0.47398046 | -1.0619359 | -1.2325027 | -1.1258644 |             |                |
| DM02478P1 | 0.47434217 | 1.1179945  | 1.3131349  | 1.0099585  | DVIR\GJ2218 | XM_002050453.1 |
| DM13336P2 | 0.47437105 | -1.1056023 | -1.0952772 | 1.0377029  |             |                |
| DM01578P3 | 0.47437292 | 1.0210357  | 1.0026916  | -1.1553245 | ADR         | XM_001844784.1 |
| DM05019P1 | 0.4744187  | -1.0105706 | -1.138111  | -1.1124744 |             |                |
| DM02508P1 | 0.47444594 | 1.2350618  | 1.1902572  | -1.0783669 | MAN2B1      | XM_001651361.1 |
| DM10707P2 | 0.4745194  | 1.0666475  | -1.1272233 | -1.0932652 |             |                |
| DM05291P1 | 0.47452146 | -1.1622744 | -1.2395164 | -1.0918945 |             |                |
| DM05701P2 | 0.4745629  | -1.0559734 | 1.0563693  | -1.0736245 |             |                |
| DM14650P3 | 0.4746533  | -1.010435  | -1.3343792 | -1.1737218 |             |                |
| DM00233P3 | 0.47466156 | -1.1284589 | -1.1601188 | -1.1218667 | TRIADDRAFT  | XM_002118025.1 |
| DM09485P3 | 0.47476703 | 1.0380466  | 1.0616419  | -1.0411288 |             |                |
| DM11197P3 | 0.4749594  | -1.0900837 | -1.0659024 | -1.0378364 |             |                |
| DM08794P1 | 0.4749852  | -1.082036  | -1.3443229 | -1.2336582 | ZDHC5       | NM_001039640.1 |
| DM04174P2 | 0.47499985 | -1.0669978 | 1.1763104  | 1.0313884  |             |                |
| DM14662P1 | 0.47535113 | -1.0361046 | -1.1939303 | 1.0142145  |             |                |
| DM02474P3 | 0.4754798  | 1.0939935  | 1.1752985  | -1.3339063 | AAEL_AAELOC | XM_001656413.1 |
| DM11898P4 | 0.47550997 | 1.1467494  | -1.0218645 | 1.1610394  |             |                |
| DM06518P2 | 0.47563186 | -1.0423253 | 1.1345626  | -1.1888748 |             |                |
| DM05044P2 | 0.47564983 | 1.519031   | 1.4455254  | -1.101924  |             |                |
| DM07132P1 | 0.47570235 | 1.054189   | -1.0257916 | 1.1596342  |             |                |
| DM13431P3 | 0.47571763 | -1.0273473 | -1.2707076 | -1.2816164 |             |                |
| DM07219P1 | 0.47579905 | -1.1404896 | -1.06363   | -1.2012378 | LBRM14_V2.1 | XM_001563386.1 |
| DM04094P1 | 0.475828   | -1.0244045 | 1.1395991  | 1.0928792  |             |                |
| DM00714P1 | 0.47601423 | 1.0227145  | -1.0033342 | -1.0634384 | BRAFLDRAFT  | XM_002588639.1 |
| DM00799P4 | 0.47608784 | -1.0759007 | -1.168354  | -1.0085981 | TRIADDRAFT  | XM_002109142.1 |
| DM04938P1 | 0.47608843 | -1.1514956 | -1.1869498 | -1.0488226 | LOC589478   | XM_789117.2    |
| DM09313P1 | 0.47612792 | 1.7928568  | 1.4104161  | 1.571986   |             |                |
| DM08116P1 | 0.47614923 | -1.1330999 | -1.0674434 | 1.0303566  |             |                |
| DM01858P2 | 0.4763312  | 1.0282317  | 1.0187057  | 3.4041085  | MONBRDRAFT  | XM_001744716.1 |
| DM10159P3 | 0.4763335  | 1.0237567  | -1.0608017 | -1.1113553 |             |                |
| DM04208P3 | 0.476355   | 1.104719   | 1.1288227  | -1.0648001 |             |                |
| DM08803P3 | 0.47664502 | 1.064567   | -1.1800401 | 1.0543356  |             |                |
| DM09076P2 | 0.47670048 | 1.0451093  | 1.1490836  | -1.039642  |             |                |
| DM15212P2 | 0.47675157 | 1.0073588  | 1.063697   | -1.088972  |             |                |
| DM12702P2 | 0.4768023  | 1.2229617  | 1.4255173  | -1.1817446 |             |                |

|           |            |            |            |            |                             |
|-----------|------------|------------|------------|------------|-----------------------------|
| DM11023P2 | 0.4768182  | 1.1405616  | 1.0648658  | 1.0244083  |                             |
| DM04516P1 | 0.47683188 | -1.1548349 | -1.0431582 | 1.1739577  |                             |
| DM09139P1 | 0.4769757  | -1.0191416 | -1.1479945 | 1.011199   |                             |
| DM10217P3 | 0.47706017 | 1.104353   | 1.3288039  | 1.4521888  |                             |
| DM00604P2 | 0.47719434 | -1.0385007 | -1.434292  | -1.2493426 | LOC1001174; XM_001601647.1  |
| DM07042P4 | 0.47731838 | -1.2286118 | -1.2299235 | 1.2295371  |                             |
| DM01046P3 | 0.47740597 | -1.0487983 | -1.0102336 | -1.1051458 | LOC1001805; XM_002125908.1  |
| DM03378P2 | 0.47759697 | -1.0110534 | -1.0351938 | 1.1288832  | LOC1001652; XM_001951709.1  |
| DM07704P2 | 0.477777   | 1.0348946  | 1.1278933  | 1.2791566  |                             |
| DM03872P1 | 0.4778058  | -1.1459504 | -1.0252941 | -1.0276532 | LOC1002027; XM_002170568.1  |
| DM03845P1 | 0.47783875 | 1.1340451  | 1.0253392  | 1.0958216  |                             |
| DM10676P3 | 0.4779687  | 1.125555   | 1.0854414  | -1.0320736 |                             |
| DM15102P2 | 0.47827426 | 1.6032678  | 1.3116095  | 1.5085881  | LOC1001596; XM_001948385.1  |
| DM10340P1 | 0.4783433  | 1.0758483  | -1.0136783 | 1.2304807  |                             |
| DM09622P1 | 0.47863638 | -1.0749389 | 1.129409   | -1.0929003 |                             |
| DM00070P1 | 0.47876915 | -1.0086695 | -1.0841835 | 1.0163751  | LOC1000261; XM_001376807.1  |
| DM04346P2 | 0.47878927 | 1.0153133  | -1.3984154 | -1.0395656 |                             |
| DM06673P3 | 0.47878927 | 1.048851   | -1.2962247 | -1.0729896 |                             |
| DM11862P2 | 0.47882104 | 1.1634073  | 1.0931658  | 1.1580584  |                             |
| DM04896P3 | 0.4788646  | 1.0048403  | -1.1005954 | 1.1465816  |                             |
| DM01704P3 | 0.4788843  | 1.0678658  | -1.1875187 | 1.0928303  | DGRIV\GH169; XM_001985196.1 |
| DM06258P1 | 0.47889677 | 1.0360146  | -1.1312852 | -1.3059633 | PTRG_04812 XM_001935110.1   |
| DM14428P2 | 0.47908646 | -1.0164042 | 1.1382205  | 1.221383   |                             |
| DM03901P2 | 0.4790954  | -1.0191336 | 1.0058991  | -1.0908908 | LOC551882 XM_624268.2       |
| DM04585P1 | 0.47920832 | -1.0576503 | -1.0872195 | 1.0371114  |                             |
| DM04149P1 | 0.47930548 | 1.0499331  | -1.1183778 | 1.0660416  |                             |
| DM10332P3 | 0.47952145 | -1.1647888 | -1.4195396 | -1.2997787 |                             |
| DM10448P1 | 0.4795393  | 1.0846025  | 1.2611045  | 1.3940262  |                             |
| DM09423P1 | 0.47969237 | -1.0969063 | -1.1359142 | -1.006121  |                             |
| DM12120P1 | 0.47986814 | 1.1233476  | 1.4513896  | 1.3402755  |                             |
| DM13743P2 | 0.47991282 | -1.0102834 | 1.1391953  | 1.2034009  |                             |
| DM08443P3 | 0.4799442  | 1.0506424  | 1.4201212  | 1.3094838  |                             |
| DM05758P2 | 0.47998783 | -1.3890595 | -1.8045803 | -1.0875828 |                             |
| DM08425P1 | 0.48001963 | 1.2196044  | 1.1001272  | 1.3018454  |                             |
| DM10540P1 | 0.480103   | -1.0885882 | 1.0762272  | 1.1430852  |                             |
| DM09275P3 | 0.48012167 | 1.1900752  | 1.2306838  | 1.0194787  |                             |
| DM05051P4 | 0.48024347 | -1.073287  | -1.0525289 | -1.1297458 |                             |
| DM00158P2 | 0.48027715 | -1.0617533 | -1.1685778 | -1.0138763 | CTSL NM_001163097.1         |
| DM09387P2 | 0.48029214 | 1.3431616  | 1.9656953  | -1.0079721 |                             |
| DM01958P4 | 0.4803753  | -1.0598137 | -1.0437136 | -1.0187528 | DMOJ\GI180; XM_002003716.1  |
| DM01251P4 | 0.48040316 | -1.0530802 | -1.3931911 | -1.2459538 | LOC1002155; XM_002163566.1  |
| DM12953P1 | 0.48048425 | -1.1932561 | -1.0300039 | 1.0099608  | DGRIV\GH156; XM_001983268.1 |
| DM03247P2 | 0.48063213 | -1.0181642 | 1.0006596  | -1.215751  |                             |
| DM06695P1 | 0.4806371  | -1.3359901 | -1.8235474 | -1.0818098 |                             |
| DM14381P2 | 0.48083034 | -1.1988038 | -1.0141699 | -1.0264136 |                             |
| DM01651P1 | 0.4808424  | -1.3141627 | -1.2519035 | -1.4857323 | LOC590458 XM_790061.1       |
| DM07043P1 | 0.4809119  | 1.1599278  | 1.1417631  | 1.0180169  |                             |
| DM05842P2 | 0.48104364 | 1.0612545  | -1.008374  | 1.1622113  | ANXB10B XM_310251.5         |
| DM12509P1 | 0.48106632 | -1.055171  | 1.0419129  | -1.0548213 |                             |
| DM07300P1 | 0.48116538 | 1.2213724  | -1.1311215 | 1.0492326  |                             |

|           |            |            |            |            |              |                |
|-----------|------------|------------|------------|------------|--------------|----------------|
| DM08953P3 | 0.4813067  | 1.1388285  | 1.2539488  | 1.3358783  |              |                |
| DM06471P2 | 0.48139226 | 1.1131961  | -1.2209686 | 1.3802135  |              |                |
| DM10863P2 | 0.48168796 | -1.059599  | -1.0425798 | -1.1147052 |              |                |
| DM03446P2 | 0.4818594  | 1.066683   | 1.1295041  | 1.1176388  |              |                |
| DM11321P1 | 0.48190397 | -1.0201617 | -1.0282844 | -1.11824   |              |                |
| DM08381P2 | 0.48193148 | -1.8670877 | -1.6542171 | 1.1269114  |              |                |
| DM01080P1 | 0.48214692 | -1.1169949 | -1.095745  | -1.0669075 |              |                |
| DM05450P2 | 0.48215652 | -1.2038488 | 1.0246961  | 1.0191389  |              |                |
| DM05984P3 | 0.48235473 | -1.0830032 | 1.0077229  | 1.0567921  |              |                |
| DM09841P3 | 0.48239702 | -1.0393834 | 1.022453   | -1.1008283 |              |                |
| DM07796P3 | 0.48249272 | 1.2292404  | 1.4459438  | 1.2931402  |              |                |
| DM09664P2 | 0.48256904 | -1.1402274 | -1.1141403 | 2.0176222  |              |                |
| DM03913P1 | 0.4826247  | 1.0486754  | -1.030148  | -1.1210438 |              |                |
| DM06212P1 | 0.48299223 | -1.0577316 | 1.1626161  | 1.1218222  |              |                |
| DM09415P3 | 0.4830665  | -1.1580819 | -1.4676694 | -1.0280659 |              |                |
| DM14841P1 | 0.4833263  | -1.0288101 | 1.0472645  | -1.0855349 |              |                |
| DM12382P4 | 0.483362   | 1.0299557  | -1.045504  | -1.0085503 |              |                |
| DM01174P3 | 0.48336908 | -1.0204909 | 1.1927407  | 1.2193065  | LOC661504    | XM_967659.2    |
| DM13700P3 | 0.4833977  | 1.1717955  | -1.1514529 | 1.0189906  |              |                |
| DM12827P1 | 0.48361376 | 1.249731   | 1.543239   | 1.0498747  | COL-101      | NM_067504.4    |
| DM09245P1 | 0.48363483 | -1.1077583 | -1.0469322 | 1.116391   |              |                |
| DM10794P2 | 0.4836958  | 1.2551532  | 1.1762829  | -1.0922234 |              |                |
| DM13137P1 | 0.48372817 | 1.0132983  | 1.2559574  | 1.3322176  |              |                |
| DM04179P2 | 0.48411772 | 1.1221303  | 1.2220061  | -1.0528558 | LOC1002556   | XM_002275894.1 |
| DM06004P1 | 0.48418668 | -1.0348227 | -1.1300896 | 1.1003668  |              |                |
| DM00862P3 | 0.4842617  | 1.0126805  | -1.0507041 | -1.0215664 | WDR7         | XM_853087.1    |
| DM08045P1 | 0.48435113 | 1.4288539  | 1.5479004  | 1.3713285  |              |                |
| DM10747P3 | 0.4843528  | 1.0952866  | 1.0137987  | -1.1134925 |              |                |
| DM06887P2 | 0.48435676 | -1.1326045 | -1.0684533 | 1.0218207  |              |                |
| DM05249P1 | 0.48441362 | 1.0540661  | 1.0915459  | -1.2090517 |              |                |
| DM14328P2 | 0.4849936  | -1.1931036 | -1.28735   | 1.0617273  |              |                |
| DM14020P3 | 0.48514968 | -1.7941592 | -1.1002663 | -1.1545749 |              |                |
| DM12508P1 | 0.48537982 | -1.2044389 | -1.0117475 | -1.0771253 |              |                |
| DM11109P2 | 0.48540264 | -1.0998406 | -1.3987682 | -1.4121703 |              |                |
| DM12607P4 | 0.48553053 | 1.0768793  | -1.0119524 | -1.1166836 | CPIPJ_CPIJOC | XM_001848796.1 |
| DM04601P1 | 0.4855416  | -1.1876218 | 1.003001   | -1.0773513 |              |                |
| DM04597P1 | 0.4856674  | -1.2589449 | 1.4293826  | 1.517136   |              |                |
| DM02735P3 | 0.4856894  | 1.0070245  | 1.0118649  | -1.0993191 | LOC409531    | XM_393037.3    |
| DM03081P3 | 0.48573503 | 1.1864686  | 1.1211456  | 1.0097117  |              |                |
| DM10746P1 | 0.48607427 | 1.0850236  | 1.0030209  | -1.0450199 |              |                |
| DM04109P2 | 0.48612517 | -1.2407148 | -1.2230873 | -1.1816595 | LOC1002415   | XM_002272433.1 |
| DM02365P2 | 0.48612976 | -1.0745069 | -1.0270015 | 1.0479889  | DPSE\GA141   | XM_001360203.2 |
| DM04079P2 | 0.4861591  | 1.1858898  | 1.5454538  | 1.1119218  |              |                |
| DM13150P1 | 0.486232   | -1.0391546 | -1.3150086 | 1.1068612  |              |                |
| DM07330P1 | 0.48626825 | 1.042858   | 1.0544512  | -1.137694  |              |                |
| DM00891P1 | 0.48634493 | 1.0091984  | -1.1216434 | -1.0411447 | DVIR\GJ1563  | XM_002058149.1 |
| DM05235P1 | 0.48640066 | -1.1143603 | -1.3214917 | 1.0105366  |              |                |
| DM11762P3 | 0.4864281  | 1.1502807  | 1.2738769  | 1.1256217  |              |                |
| DM05548P1 | 0.48673642 | 1.1814995  | 1.1494149  | 1.0706193  | DGR1\GH142   | XM_001995914.1 |
| DM08572P1 | 0.4867863  | 1.1369922  | 1.4935582  | -1.0784839 |              |                |

|           |            |            |            |            |                            |
|-----------|------------|------------|------------|------------|----------------------------|
| DM11498P2 | 0.48683915 | 1.122136   | 1.121312   | -1.0039638 |                            |
| DM03754P2 | 0.48686597 | 1.0803878  | -1.1408784 | -1.3335352 |                            |
| DM04343P3 | 0.4868752  | 1.142169   | -1.0163903 | -1.0757236 |                            |
| DM03048P1 | 0.48693725 | 1.0335113  | -1.0385865 | -1.1591382 | AAEL_AAELOC XM_001653959.1 |
| DM13663P1 | 0.4870316  | -1.2116991 | -1.084899  | -1.1126263 |                            |
| DM10065P3 | 0.4871021  | 1.0592741  | 1.2512968  | -1.030616  |                            |
| DM12240P4 | 0.4871092  | 1.0091355  | -1.2041075 | 1.2173986  |                            |
| DM10214P1 | 0.48711237 | 1.1002285  | -1.0205688 | 1.0683811  |                            |
| DM05515P1 | 0.48739806 | -1.0084271 | -1.1948345 | 1.2494987  |                            |
| DM06503P3 | 0.48742932 | -1.1629049 | 1.029509   | 1.0729215  |                            |
| DM04388P2 | 0.4876293  | -1.2495508 | -1.0594152 | -1.493799  | LOC663339 XM_969391.2      |
| DM09253P3 | 0.48770422 | 1.2428533  | 1.058415   | 1.225723   |                            |
| DM15222P1 | 0.4877231  | 1.1110672  | 1.0236381  | 1.2543304  |                            |
| DM09776P3 | 0.4878352  | 1.0384991  | -1.1072389 | 1.0713694  |                            |
| DM06960P2 | 0.48783794 | 1.0388936  | -1.630336  | 1.0863044  |                            |
| DM13050P1 | 0.48786458 | 1.0076566  | 1.1018096  | 1.1987938  |                            |
| DM07310P1 | 0.4879406  | 1.1738592  | 1.0601952  | 1.0948466  |                            |
| DM06234P2 | 0.4882585  | 1.1299539  | 1.1848296  | 1.1049037  | DSEC\GM235 XM_002032388.1  |
| DM04725P3 | 0.4884234  | -1.0819136 | -1.3349317 | -1.2306039 | DMOJ\GI1472 XM_002010320.1 |
| DM01859P1 | 0.48845577 | -1.0273085 | 1.2083338  | 1.1365777  | BRAFLDRAFT XM_002600871.1  |
| DM01195P2 | 0.48857614 | -1.0954431 | -1.0621583 | -1.137241  | DPSE\GA140 XM_001361358.2  |
| DM05625P3 | 0.4887941  | -1.0480928 | -1.1001049 | -1.0959414 |                            |
| DM07488P2 | 0.4888523  | -1.1474384 | -1.1455994 | -1.0702416 |                            |
| DM01380P1 | 0.48919645 | 1.0438931  | -1.0275358 | 1.2276397  |                            |
| DM14908P3 | 0.48920992 | -1.12303   | 1.0911891  | 1.2786826  |                            |
| DM04813P2 | 0.48926058 | 1.1574415  | 1.099434   | -1.0038139 | LOC1002096 XM_002154218.1  |
| DM12085P3 | 0.48926502 | -1.035666  | -1.290392  | -1.0303524 |                            |
| DM13512P3 | 0.48930392 | -1.1563364 | 1.0022575  | -1.134242  |                            |
| DM09551P2 | 0.48936406 | -1.0871578 | 1.0518286  | 1.1032604  |                            |
| DM15040P1 | 0.48954055 | 1.3377397  | 1.3982525  | -1.0914108 |                            |
| DM04463P1 | 0.4895454  | 1.0799785  | 1.3704891  | -1.0179315 |                            |
| DM00050P1 | 0.48955002 | -1.0590653 | -1.3497125 | -1.2513576 | DGRIN\GH126 XM_001991466.1 |
| DM03333P1 | 0.48961335 | 1.1055816  | 1.047036   | 1.2436805  | GEL XM_002102026.1         |
| DM08704P3 | 0.4896567  | 1.0894395  | 1.7422115  | 1.2795926  |                            |
| DM12068P4 | 0.48968047 | -1.0551562 | 1.1373392  | -1.2166744 |                            |
| DM05549P2 | 0.48968866 | 1.2418649  | 1.1121149  | -1.0119817 |                            |
| DM11437P2 | 0.489768   | -1.2251922 | -1.067078  | -1.2695274 |                            |
| DM02814P1 | 0.48987597 | -1.0983362 | 1.0002669  | 1.1134596  | NNT NM_001128002.1         |
| DM12701P2 | 0.48989594 | -1.0720791 | -1.1096629 | 1.0945816  |                            |
| DM05601P1 | 0.48991236 | -1.3141474 | -1.1951202 | -1.1588895 | DSIM\GD196 XM_002102177.1  |
| DM10779P1 | 0.4899852  | 1.3670498  | 1.3898629  | 1.0586315  |                            |
| DM01358P2 | 0.48999825 | -1.0820688 | -1.050048  | -1.1608931 | LOC1000851 XM_001515453.1  |
| DM14472P2 | 0.49017066 | -1.1064912 | -1.0106262 | -1.044695  |                            |
| DM12143P1 | 0.49020836 | 1.448165   | 1.2569633  | 1.3217883  |                            |
| DM01479P1 | 0.49027783 | 1.0382891  | 1.1191685  | -1.0015378 | PHYPADRAFT XM_001759189.1  |
| DM00673P1 | 0.4903031  | -1.0803884 | -1.3455062 | -1.2223079 | LOC658917 XM_965265.2      |
| DM14365P1 | 0.4903509  | -1.1247526 | -1.00793   | -1.0484335 |                            |
| DM06674P2 | 0.49052656 | 1.0058221  | 1.0560799  | -1.1482116 |                            |
| DM07369P2 | 0.49061272 | 1.0233233  | -1.0140791 | -1.1687478 |                            |
| DM12979P2 | 0.49081856 | -1.1305343 | -1.1315681 | 1.0797839  |                            |

|           |            |            |            |            |             |                |
|-----------|------------|------------|------------|------------|-------------|----------------|
| DM11847P2 | 0.4910468  | 1.0206958  | -1.2353561 | -1.0954399 |             |                |
| DM01312P2 | 0.49111572 | -1.146369  | -1.0009896 | -1.0592939 | SSDP        | XM_623508.2    |
| DM10266P2 | 0.4911956  | -1.0543051 | -1.113395  | -1.3288299 |             |                |
| DM08241P2 | 0.491429   | -1.0382758 | -1.112987  | -1.1331514 |             |                |
| DM08251P3 | 0.4914562  | 1.1490419  | 1.0631121  | -1.0532346 |             |                |
| DM08285P1 | 0.49149227 | -1.0580866 | 1.0670761  | 1.1018     |             |                |
| DM09809P3 | 0.4915121  | -1.3920048 | -1.1551653 | -1.0581989 |             |                |
| DM01886P1 | 0.49193504 | -1.086639  | -1.1390401 | 1.058433   | CG3731      | NM_169607.1    |
| DM01163P3 | 0.4921849  | -1.0703838 | -1.0410025 | -1.1245965 | LOC1001759  | XM_002120198.1 |
| DM13457P3 | 0.49224254 | -1.2049844 | 1.1743678  | 1.1884375  |             |                |
| DM06845P3 | 0.49235803 | -1.1819745 | -1.0442797 | 1.0355533  |             |                |
| DM07098P3 | 0.4923937  | 1.2480111  | 1.0901494  | 1.3629278  |             |                |
| DM03655P1 | 0.49245492 | 1.2900045  | 1.2249213  | 1.0071676  | OTOP        | XM_001863189.1 |
| DM09574P1 | 0.49247223 | -1.4315232 | -1.417508  | -1.3103274 |             |                |
| DM13179P1 | 0.4926678  | 1.0601692  | -1.2664263 | -1.0156956 | LOC552459   | XM_625286.2    |
| DM14181P2 | 0.49273244 | -1.0205692 | 1.001288   | -1.1127776 | LOC1002066  | XM_002156730.1 |
| DM05910P2 | 0.49279746 | -1.0394037 | -1.017647  | -1.1680125 |             |                |
| DM12981P2 | 0.49289593 | -1.2697312 | -1.1569118 | 1.1375825  |             |                |
| DM03454P3 | 0.49294978 | 1.0523177  | -1.0582874 | 1.027751   |             |                |
| DM13121P2 | 0.49311525 | -1.2596825 | -1.9280717 | 1.495119   |             |                |
| DM15161P2 | 0.4931444  | 1.1393629  | -1.1069835 | 1.3885052  |             |                |
| DM10208P1 | 0.49315602 | 1.0407835  | 1.1009854  | 1.0817044  |             |                |
| DM05772P4 | 0.49325576 | -1.0704334 | -1.3629867 | -1.1365002 |             |                |
| DM02214P4 | 0.49327818 | 1.0131567  | -1.0906523 | 1.5155503  | DANA\GF157  | XM_001962996.1 |
| DM04643P2 | 0.49331582 | 1.038755   | 1.1719648  | 1.01212    | KAT8        | XM_625072.2    |
| DM14612P2 | 0.49335364 | 1.0068326  | 1.3840016  | 1.3223053  |             |                |
| DM08191P1 | 0.493549   | -1.0372186 | 1.1534914  | 1.0763724  |             |                |
| DM00946P4 | 0.49361727 | -1.2246588 | 1.069672   | -1.0336084 | TRIADDRAFT  | XM_002108993.1 |
| DM14571P1 | 0.49396816 | -1.0437102 | -1.1656119 | 1.0539154  | PBRM1       | NM_018165.4    |
| DM04098P1 | 0.49406207 | -1.0251262 | 1.0672336  | 1.1418158  | AAEL_AAEL0C | XM_001658403.1 |
| DM13575P3 | 0.494108   | -1.3729111 | -1.2568796 | -1.1319577 |             |                |
| DM13591P4 | 0.49424466 | -1.2361293 | -1.314074  | -1.0859858 |             |                |
| DM13265P2 | 0.4944269  | 1.0394248  | 1.1946256  | 1.1186783  |             |                |
| DM02589P3 | 0.49463075 | -1.0161341 | -1.6639967 | -1.0597812 |             |                |
| DM04172P2 | 0.494639   | 1.0363308  | -1.0257593 | 1.066024   |             |                |
| DM00606P1 | 0.49466377 | 1.0500572  | 1.0134032  | -1.110272  |             |                |
| DM05141P2 | 0.49472392 | 1.2459455  | 1.0303644  | 1.3430644  |             |                |
| DM02384P1 | 0.49478003 | 1.1840218  | 1.3755634  | 1.1260006  | AAEL_AAEL0C | XM_001649991.1 |
| DM07852P4 | 0.49483636 | -1.1337138 | -1.309833  | -1.238112  |             |                |
| DM04639P3 | 0.49489248 | -1.0626707 | -1.0917532 | -1.0692124 |             |                |
| DM02359P1 | 0.49492785 | -1.1872869 | -1.1237663 | -1.0763422 | LOC1002159  | XM_002167054.1 |
| DM03720P2 | 0.49500325 | 1.1578449  | 1.0329647  | 1.0559944  |             |                |
| DM05519P1 | 0.49504137 | 1.0180931  | -1.2263932 | 1.0167234  |             |                |
| DM07856P1 | 0.4951066  | -1.0310897 | -1.0518456 | -1.0063101 |             |                |
| DM12548P1 | 0.49511954 | -1.2148174 | -1.2174133 | -1.5260502 |             |                |
| DM03549P4 | 0.49512252 | -1.0177277 | 1.4013854  | 1.0839804  |             |                |
| DM13047P1 | 0.495324   | 1.157567   | 1.2888625  | 1.5355844  |             |                |
| DM05082P1 | 0.49539095 | -1.1221102 | -1.2531556 | -1.2742754 |             |                |
| DM14461P2 | 0.4954183  | 1.0424875  | 1.1440308  | 1.1537416  |             |                |
| DM02992P3 | 0.49553782 | 1.4185816  | 1.2289052  | -1.6378049 |             |                |

|           |            |            |            |            |                            |
|-----------|------------|------------|------------|------------|----------------------------|
| DM08217P1 | 0.49558723 | -1.1777787 | 1.1680924  | -1.209947  |                            |
| DM15139P1 | 0.495806   | 1.0341932  | 1.2274891  | 1.1622586  | GABARAPL1 NM_020590.4      |
| DM02466P1 | 0.4958412  | -1.1014155 | -1.9362546 | -1.3630701 | PHYPADRAFT_XM_001771875.1  |
| DM09879P3 | 0.49597013 | -1.0434184 | -1.1747811 | -1.1076101 |                            |
| DM14576P1 | 0.49607044 | -1.0169657 | 1.0350974  | 1.0326192  |                            |
| DM05688P2 | 0.4960893  | -1.001308  | 1.1106324  | -1.0211585 |                            |
| DM03826P1 | 0.49612686 | 1.0216593  | 1.2002766  | 1.2306304  | LOC1000279_XM_001371105.1  |
| DM08024P1 | 0.4962815  | -1.1183461 | 1.1440169  | -1.295346  |                            |
| DM06236P2 | 0.49628723 | 1.2903501  | 1.2658533  | -1.1989865 | OS05G02958 NM_001061648.1  |
| DM07459P3 | 0.4963549  | -1.0465657 | -1.1766328 | -1.0050032 |                            |
| DM00287P2 | 0.4964506  | -1.123693  | -1.1309361 | -1.0222466 | DSIM\GD102_XM_002080317.1  |
| DM00532P2 | 0.49667853 | 1.0850204  | -1.0716305 | 1.0793672  | LOC1001847_XM_002125926.1  |
| DM01551P2 | 0.49673688 | -1.1206048 | -1.0608224 | -1.0347112 | DMOJ\GI197_XM_002004219.1  |
| DM00047P1 | 0.49677405 | 1.0264966  | 1.0609888  | 1.0905422  | HCAG_07965_XM_001536806.1  |
| DM01090P2 | 0.4968031  | 1.0173562  | -1.0344409 | 1.1290854  | POR XM_001214242.1         |
| DM01647P1 | 0.49701798 | 1.0054297  | -1.091527  | -1.0109189 | RPL32 XM_001656684.1       |
| DM09578P3 | 0.49703115 | -1.1343359 | -1.0969576 | 1.1564738  |                            |
| DM14533P1 | 0.49703136 | -1.0564733 | -1.1021868 | -1.2341642 |                            |
| DM04056P2 | 0.49705365 | -1.0804746 | -1.2629966 | -1.0699648 |                            |
| DM11103P3 | 0.49709123 | -1.1095666 | 1.0205901  | -1.0379705 |                            |
| DM14858P3 | 0.49715856 | -1.0742962 | 1.1032674  | 1.132485   |                            |
| DM01746P3 | 0.4971764  | -1.1092862 | 1.003746   | 1.117615   | LOC1002323_XM_002197276.1  |
| DM02873P2 | 0.49726772 | 1.1822654  | 1.1774621  | 1.1780444  | DANA\GF191_XM_001967126.1  |
| DM10968P3 | 0.4974808  | 1.0190378  | -1.1661326 | 1.0310998  |                            |
| DM10716P1 | 0.49759385 | -1.047719  | -1.0597236 | 1.078221   |                            |
| DM13492P4 | 0.49762487 | 1.2411493  | -1.0724243 | 1.21184    |                            |
| DM07347P2 | 0.49775195 | 1.0810673  | -1.3309206 | 1.0716974  |                            |
| DM00368P2 | 0.4977768  | 1.0103927  | -1.0587873 | -1.1131828 | LOC1000227_XM_001368952.1  |
| DM10965P3 | 0.4978104  | 1.071908   | 1.0291612  | 1.0590322  |                            |
| DM13750P3 | 0.4981214  | -1.052447  | -1.1315366 | -1.1834987 |                            |
| DM05605P1 | 0.4981701  | 1.0334811  | -1.0281777 | -1.2123771 |                            |
| DM06041P3 | 0.49837467 | 1.0482562  | -1.06844   | -1.0653595 | PDH XM_001650646.1         |
| DM02771P3 | 0.4984117  | -1.0224617 | -1.0292181 | -1.1114819 |                            |
| DM05578P3 | 0.49850017 | 1.0202557  | 1.0414816  | 1.1037493  | BRAFLDRAFT_XM_002598195.1  |
| DM01342P3 | 0.49855995 | -1.3566563 | -1.1744277 | 1.0900487  |                            |
| DM02738P2 | 0.4986187  | 1.0779456  | 1.0910189  | -1.2530239 | DPSE\GA155_XM_001361338.2  |
| DM08358P2 | 0.4987876  | -1.1023823 | -1.7272769 | -1.0646695 |                            |
| DM09781P3 | 0.4988319  | 1.111197   | 1.1449085  | -1.0329365 |                            |
| DM05856P3 | 0.49885786 | -1.2514156 | -1.2146889 | -1.0519063 |                            |
| DM00178P3 | 0.4988951  | 1.1141555  | -1.092857  | -1.0956646 | LOC1001613(XM_001948694.1  |
| DM11608P1 | 0.49897298 | 1.040525   | 1.5865582  | 1.8124472  |                            |
| DM00815P1 | 0.49908283 | -1.0959382 | -1.1233331 | -1.1347522 | DSEC\GM201_XM_002033871.1  |
| DM10710P1 | 0.49912944 | 1.0939221  | 1.0676349  | 1.0057352  |                            |
| DM09970P3 | 0.49918503 | 1.227273   | 1.106695   | 1.160556   |                            |
| DM06407P2 | 0.499287   | -1.1427352 | 1.0648832  | 1.0892274  |                            |
| DM12951P2 | 0.4993147  | 1.0897106  | -1.7186475 | 1.1141778  |                            |
| DM08716P2 | 0.4994003  | -1.4234695 | -1.0937606 | -1.5705007 | MONBRDRAF_XM_001746877.1   |
| DM07699P1 | 0.4994974  | 1.0307442  | -1.412197  | 1.1850386  |                            |
| DM02316P2 | 0.4995268  | -1.1712911 | -1.0249349 | 1.0664192  | DVIR\GJ1253_XM_002046345.1 |
| DM02049P3 | 0.49962628 | -1.1509268 | -1.0952463 | -1.0438282 | DVIR\GJ1456_XM_002051093.1 |

|           |            |            |            |            |             |                |
|-----------|------------|------------|------------|------------|-------------|----------------|
| DM15256P3 | 0.49969125 | -1.4721333 | -1.0834082 | -1.1963937 |             |                |
| DM10607P2 | 0.49979755 | -1.1072164 | 1.231424   | 1.0878453  |             |                |
| DM01942P2 | 0.50016665 | -1.065773  | 1.0059674  | 1.0977949  | LOC1000704: | XM_001917207.1 |
| DM09824P3 | 0.50054467 | -1.1345366 | -1.0648962 | -1.238591  |             |                |
| DM12403P1 | 0.5005937  | 1.1213026  | -1.044384  | 1.1708802  |             |                |
| DM07496P1 | 0.50062126 | -1.0245863 | -1.1613737 | -1.0536684 |             |                |
| DM09583P3 | 0.5006238  | 1.0351694  | 1.0611606  | -1.1289436 |             |                |
| DM04536P2 | 0.50084156 | -1.2164699 | -1.7407503 | -1.0143595 |             |                |
| DM07981P1 | 0.50088704 | -1.1354706 | 1.1317176  | -1.347348  |             |                |
| DM09521P3 | 0.5012402  | 1.0654794  | 1.1950369  | -1.0794241 |             |                |
| DM07995P1 | 0.50149995 | -1.0962656 | 1.1232598  | 1.1398481  |             |                |
| DM03433P3 | 0.5015177  | -1.0729073 | -1.0258036 | -1.12021   | NEMVEDRAFT  | XM_001637168.1 |
| DM14985P2 | 0.5015907  | -1.0332326 | 1.1806663  | -1.0602741 |             |                |
| DM14398P2 | 0.50173616 | -1.0278605 | 1.0523596  | 1.0890445  |             |                |
| DM07339P4 | 0.5017547  | 1.1273365  | 1.0694243  | 1.0805345  |             |                |
| DM11003P3 | 0.501756   | -1.0956508 | 1.2104316  | 1.1929209  |             |                |
| DM00955P3 | 0.5017714  | -1.2814435 | -1.2761382 | -1.286366  | ISYNA1      | NM_001046032.1 |
| DM01961P1 | 0.50180274 | -1.2176851 | 1.0450205  | 1.0487223  | CG33138     | NM_176162.1    |
| DM08301P2 | 0.5018038  | -1.0930189 | -1.0258629 | -1.1193198 |             |                |
| DM04100P1 | 0.501932   | -1.067073  | -1.0311363 | 1.1026601  |             |                |
| DM01436P1 | 0.5020147  | 1.120578   | 1.0269043  | 1.041715   | NEMVEDRAFT  | XM_001636895.1 |
| DM13176P3 | 0.5020843  | -1.1113786 | -1.0275729 | -1.0075778 |             |                |
| DM02147P1 | 0.5022388  | -1.1118972 | -1.1377617 | -1.1453933 | LOC1000796: | XM_001510507.1 |
| DM10078P1 | 0.5022516  | -1.5151564 | 1.2235116  | -1.1059673 |             |                |
| DM10931P1 | 0.50226593 | -1.0285279 | 1.0467854  | -1.0923276 |             |                |
| DM10277P1 | 0.5024143  | -1.0340668 | -1.0190187 | -1.1377579 |             |                |
| DM12643P2 | 0.50279653 | 1.3288188  | -1.0552756 | 1.0940597  | MGC80262    | NM_001091737.1 |
| DM10414P2 | 0.5028735  | -1.0910375 | -1.1467872 | -1.1147413 |             |                |
| DM05064P2 | 0.5031036  | 1.1440287  | 1.0987978  | -1.037623  |             |                |
| DM05593P3 | 0.5032457  | -1.0526477 | 1.0101347  | -1.0368145 |             |                |
| DM00259P2 | 0.5032658  | 1.1848861  | 1.2253449  | 1.1764187  | ZFAND2B     | NM_001095372.1 |
| DM09880P2 | 0.5032724  | -1.0617094 | -1.0732932 | -1.0431547 |             |                |
| DM06060P2 | 0.5032844  | 1.4985523  | 1.1291322  | 1.3622378  |             |                |
| DM13329P3 | 0.5033184  | 1.1194625  | 1.2035116  | 1.089365   |             |                |
| DM09019P4 | 0.5034289  | 1.1172322  | 1.2062848  | 1.193733   |             |                |
| DM06059P1 | 0.5035579  | 1.1444618  | -1.0033312 | 1.1916115  | LOC1001235: | XM_001607963.1 |
| DM11584P1 | 0.5035596  | -1.0935876 | 1.0744873  | -1.0615077 |             |                |
| DM12692P4 | 0.503566   | -1.215659  | -1.310834  | 1.2766279  |             |                |
| DM10900P2 | 0.5035834  | -1.0013472 | 1.1760643  | 1.1830199  |             |                |
| DM12967P3 | 0.5037     | -1.0097513 | 1.0231974  | -1.1054568 |             |                |
| DM05016P3 | 0.50374925 | 1.1078651  | -1.2221011 | 1.5581257  |             |                |
| DM03738P2 | 0.5038137  | -1.1007231 | 1.1466037  | 1.3380133  |             |                |
| DM13236P3 | 0.5039109  | 1.1276208  | 1.0733917  | -1.0656816 |             |                |
| DM05804P1 | 0.5039413  | 1.3463318  | 1.1742005  | 1.2430924  | DGRI\GH125: | XM_001991296.1 |
| DM14399P1 | 0.5039824  | 1.1364782  | 1.1727178  | 1.3038582  |             |                |
| DM13773P1 | 0.50405586 | 1.0408099  | -1.5030073 | 1.0835887  |             |                |
| DM01024P3 | 0.504115   | -1.0323468 | 1.0826932  | 1.0124458  | LOC727108   | XM_001122822.1 |
| DM04599P2 | 0.5041229  | 1.294942   | -1.2156122 | 1.1205449  |             |                |
| DM03311P1 | 0.5041951  | -1.0029424 | 1.0147212  | -1.0627623 | RAB11B      | XM_001147785.1 |
| DM07439P1 | 0.50422615 | -1.0882427 | -1.1302273 | -1.2432966 |             |                |

|           |            |            |            |            |              |                |
|-----------|------------|------------|------------|------------|--------------|----------------|
| DM03616P1 | 0.50435084 | -1.1306726 | -1.217788  | 1.0687169  | LOC580325    | XM_780392.2    |
| DM10253P1 | 0.50454026 | 1.18857    | 1.1653683  | 1.1889024  |              |                |
| DM00135P3 | 0.50484544 | -1.012983  | -1.4699304 | -1.2872292 | LOC1002213   | XM_002189117.1 |
| DM13667P2 | 0.5050165  | -1.1588197 | 1.0361255  | 1.077822   |              |                |
| DM02944P1 | 0.50513893 | -1.0986134 | 1.0416546  | 1.2246295  |              |                |
| DM00588P3 | 0.50534695 | 1.0524105  | 1.1191831  | 1.1206621  | LOC1001756   | XM_002129364.1 |
| DM13347P1 | 0.5055789  | -1.0529464 | 1.0079302  | -1.1063088 |              |                |
| DM03856P3 | 0.5058404  | -1.085507  | -1.011024  | 1.0526737  | LACBIDRAFT   | XM_001873992.1 |
| DM04686P2 | 0.5058443  | 1.0541289  | 1.0962868  | 1.0612211  |              |                |
| DM09957P3 | 0.5059675  | -1.0955739 | -1.2101778 | -1.1388086 |              |                |
| DM14149P4 | 0.5060626  | -1.0555017 | 1.1124476  | 1.0341271  |              |                |
| DM09274P2 | 0.50614977 | -1.0289949 | -1.0496835 | 1.0809199  |              |                |
| DM04510P2 | 0.5061502  | 1.0416719  | -1.14202   | -1.2408181 |              |                |
| DM06229P1 | 0.506168   | -1.0112312 | -1.1514492 | -1.319498  |              |                |
| DM12865P2 | 0.5065548  | 1.4441562  | 1.4635963  | 1.0015514  | LOC593811    | XM_793273.2    |
| DM02029P3 | 0.50656635 | -1.0601606 | -1.1776341 | -1.1189841 | RER1         | NM_001093371.1 |
| DM08470P3 | 0.5065831  | -1.2609541 | -1.0390376 | -1.4646878 |              |                |
| DM04514P1 | 0.50669163 | -1.1069084 | -2.4389825 | -1.0561002 |              |                |
| DM14452P2 | 0.50670063 | 1.224596   | 1.2939906  | 1.1463996  |              |                |
| DM02603P1 | 0.5067399  | 1.1238414  | -1.050409  | 1.007557   |              |                |
| DM09544P3 | 0.5068562  | -1.0274223 | 1.0952954  | 1.1456584  |              |                |
| DM06592P1 | 0.50689274 | -1.1683415 | -1.0132667 | -1.0534506 |              |                |
| DM14592P2 | 0.5070399  | -1.0831704 | -1.0460098 | -1.1949993 |              |                |
| DM01630P2 | 0.507372   | -1.0045747 | -1.0121546 | -1.1319109 | CPIPJ_CPIJ01 | XM_001863973.1 |
| DM10088P1 | 0.50745827 | 1.1542321  | -1.2394284 | 1.1374224  |              |                |
| DM07392P2 | 0.5075245  | 1.053097   | -1.0024129 | -1.0970118 |              |                |
| DM07998P1 | 0.5075819  | 1.0556018  | -1.3484143 | -1.4127569 |              |                |
| DM10056P2 | 0.5077279  | 1.0505838  | 1.1599147  | -1.0728353 |              |                |
| DM07753P2 | 0.50780797 | 1.4543891  | 1.361027   | 1.1767453  |              |                |
| DM12669P3 | 0.5078112  | -1.0862292 | -1.111764  | 1.0807347  |              |                |
| DM01343P1 | 0.5078843  | -1.116169  | -1.1992247 | 1.1758587  | EEF1A        | XM_001269545.1 |
| DM03483P1 | 0.5080317  | -1.1460434 | 1.014876   | -1.0649213 | LOC657518    | XM_963974.1    |
| DM04215P2 | 0.5083483  | -1.045404  | -1.0442358 | 1.207347   |              |                |
| DM09858P3 | 0.5083741  | 1.0097786  | -1.3433199 | 1.2251345  |              |                |
| DM02433P4 | 0.50843954 | 1.0089537  | -1.0840461 | 1.0609722  | LOC1000319   | XM_001381044.1 |
| DM12549P1 | 0.5085763  | -1.0832207 | -1.1440461 | -1.1304995 |              |                |
| DM10652P1 | 0.508603   | -1.0454304 | -1.0964478 | -1.005647  |              |                |
| DM04534P1 | 0.50872874 | -1.0224198 | -1.634646  | -1.1469334 |              |                |
| DM07948P2 | 0.508884   | 1.0094622  | 1.1874745  | -1.0098428 |              |                |
| DM06116P1 | 0.50914615 | 1.0717261  | -1.117557  | 1.063668   | DYAK\GE131   | XM_002090468.1 |
| DM08731P1 | 0.5092981  | -1.0166146 | 1.1119514  | 1.0122771  |              |                |
| DM07222P1 | 0.5094964  | -1.0099576 | 1.1307626  | 1.1196854  |              |                |
| DM09147P3 | 0.50964576 | 1.2522675  | 1.6631987  | 1.0537817  |              |                |
| DM00480P1 | 0.510011   | -1.2391223 | -1.0646094 | -1.1226984 | INX          | XM_001649705.1 |
| DM03777P3 | 0.51001835 | 1.0524284  | 1.193425   | 1.0926784  | LOC660939    | XM_967133.2    |
| DM08936P1 | 0.5102735  | -1.2392801 | -1.123679  | -1.3339609 |              |                |
| DM00896P3 | 0.51062137 | -1.152472  | -1.1515125 | -1.0644729 | LOC412876    | XR_015030.1    |
| DM13114P1 | 0.5107071  | -1.2876872 | -1.3604627 | -1.2644442 | PCCA         | XM_001148773.1 |
| DM15351P1 | 0.51074356 | 1.1378088  | -1.1114875 | 1.123241   |              |                |
| DM05389P4 | 0.51077485 | 1.0481856  | 1.0263726  | 1.1554087  |              |                |



|           |            |            |            |            |             |                |
|-----------|------------|------------|------------|------------|-------------|----------------|
| DM11497P3 | 0.51102936 | -1.0807049 | 1.0385003  | -1.0018579 |             |                |
| DM05048P2 | 0.51111275 | 1.0724223  | -1.1959378 | -1.1086714 |             |                |
| DM04349P1 | 0.51131946 | 1.1655504  | 1.0356358  | -1.0663183 | MTCP1       | NM_010839.5    |
| DM01762P2 | 0.5113896  | -1.0368991 | -1.1241559 | -1.1372341 | DWIL\GK110! | XM_002070358.1 |
| DM10373P2 | 0.5117498  | 1.0488223  | -1.0904123 | 1.1081635  |             |                |
| DM03870P1 | 0.51180214 | 1.0784725  | -1.0520006 | 1.2212535  |             |                |
| DM07893P1 | 0.5118378  | 1.2413001  | -1.0627457 | 1.2433776  |             |                |
| DM01909P2 | 0.51210564 | -1.0334451 | -1.0534847 | -1.1619017 | MRPS11      | NM_079658.3    |
| DM12803P1 | 0.5121778  | -1.058938  | 1.0448829  | 2.8937325  |             |                |
| DM13274P1 | 0.5122756  | -1.1744981 | 1.1091884  | 1.0783668  |             |                |
| DM11370P1 | 0.5122978  | 1.4761758  | 1.4053904  | 1.0082098  |             |                |
| DM12655P1 | 0.5123582  | 1.4324131  | 1.2423022  | 1.3107728  |             |                |
| DM02324P1 | 0.5125407  | 1.065116   | -1.0823035 | 1.2173328  | DERE\GG172  | XM_001980591.1 |
| DM13481P3 | 0.51258916 | -1.118104  | -1.0544904 | -1.0884411 |             |                |
| DM14849P4 | 0.512941   | -1.1125576 | -1.0474206 | -1.1117781 |             |                |
| DM13324P1 | 0.5130838  | 1.1635672  | -1.163303  | -1.262603  |             |                |
| DM13508P3 | 0.51323795 | 1.169736   | 1.1773282  | 1.2044988  |             |                |
| DM08022P1 | 0.5133332  | -1.0378915 | 1.0269105  | 1.0631034  |             |                |
| DM10072P3 | 0.51349455 | 1.0480596  | -1.2272565 | -1.071927  |             |                |
| DM02658P4 | 0.5135177  | -1.0181558 | 1.0803746  | -1.0536714 | MAPKK3/6    | NM_001078473.1 |
| DM09985P1 | 0.5135528  | 1.0076971  | -1.0851301 | -1.0346895 |             |                |
| DM02930P3 | 0.513663   | -1.1607925 | -1.124289  | -1.0026275 | LOC577064   | XM_777318.2    |
| DM09460P1 | 0.5138047  | 1.1226472  | -1.0628732 | -1.1925716 |             |                |
| DM01959P1 | 0.513824   | -1.0270568 | -1.0342977 | -1.1316236 | AAEL_AAEL0C | XM_001655565.1 |
| DM11606P4 | 0.51391494 | 1.0095546  | -1.0824718 | -1.0612757 |             |                |
| DM05055P4 | 0.5139821  | -1.2391882 | -1.4497123 | -1.3169436 |             |                |
| DM08422P1 | 0.51401246 | 1.0762336  | 1.0142292  | 1.0879363  | ISCW_ISCWC  | XM_002415101.1 |
| DM13111P2 | 0.5140807  | -1.0788114 | -1.132987  | -1.1000041 |             |                |
| DM14362P2 | 0.51408917 | -1.0543457 | 1.0153517  | 1.0345523  |             |                |
| DM14275P2 | 0.5141052  | 1.1981914  | -1.0552108 | 1.0636946  |             |                |
| DM10039P1 | 0.51413685 | -1.1091592 | -1.3825893 | -1.1790941 |             |                |
| DM15217P1 | 0.5141847  | -1.1333507 | -1.0459056 | -1.0294919 |             |                |
| DM06019P1 | 0.51422113 | 1.2117643  | -1.0881195 | 1.0760905  | LOC725115   | XM_001121000.1 |
| DM04069P1 | 0.51439863 | 1.0873549  | -1.0375353 | -1.0865813 | LOC408625   | XM_392166.3    |
| DM08047P3 | 0.5144284  | 1.1244569  | 1.334752   | 1.3261151  |             |                |
| DM03350P1 | 0.5144303  | 1.0066898  | -1.0214005 | -1.0334756 | CHIT        | XM_001841628.1 |
| DM14596P3 | 0.51453245 | -1.0561084 | 1.0896568  | -1.043662  | LOC550659   | XM_623054.2    |
| DM14637P3 | 0.51472193 | -1.1802335 | -1.4345118 | -1.3582197 |             |                |
| DM10792P2 | 0.51491    | -1.0449927 | -1.0126173 | -1.0178531 | FG07581.1   | XM_387757.1    |
| DM15293P2 | 0.51492536 | 1.00525    | -1.1138798 | 1.0701016  |             |                |
| DM13789P3 | 0.5149744  | 1.0899514  | 1.1296594  | 1.129394   |             |                |
| DM05798P1 | 0.5150026  | 1.023662   | -1.3233845 | -1.0786877 |             |                |
| DM09822P2 | 0.5151833  | 1.5907489  | -1.0865105 | -1.0709552 |             |                |
| DM07336P2 | 0.51524514 | 1.1219753  | -1.0237458 | 1.0287446  |             |                |
| DM15415P1 | 0.5154988  | -1.0005995 | -1.0466926 | 1.008251   |             |                |
| DM05598P2 | 0.5154997  | -1.1148919 | -1.0654233 | -1.0605069 |             |                |
| DM02689P1 | 0.51557046 | -1.0890045 | 1.0007015  | 1.0111455  | EIF2S3      | NM_001087096.1 |
| DM10071P1 | 0.5155876  | 1.1139796  | -1.0389574 | -1.2536258 |             |                |
| DM09241P1 | 0.51562905 | -1.0847994 | 1.0432839  | 1.0318863  |             |                |
| DM12237P1 | 0.5156458  | 1.0546812  | 1.1033837  | -1.0206159 |             |                |

|           |            |            |            |            |             |                |
|-----------|------------|------------|------------|------------|-------------|----------------|
| DM12040P3 | 0.51598364 | 1.0539031  | -1.1817396 | -1.0922724 |             |                |
| DM10674P2 | 0.5160449  | 1.2461903  | -1.1316168 | 1.0065699  |             |                |
| DM05794P1 | 0.51611525 | -1.0710238 | -1.2414889 | -1.1416115 |             |                |
| DM00758P2 | 0.51615196 | 1.0902603  | -1.1126453 | -1.1160852 | HMGCR       | NM_204485.1    |
| DM04625P1 | 0.51617736 | -1.0709137 | -1.334751  | 1.2658856  |             |                |
| DM06579P3 | 0.5163242  | 1.2249961  | 1.5414304  | -1.0714208 |             |                |
| DM11561P1 | 0.5165809  | 1.2052867  | 1.0202305  | -1.0824171 |             |                |
| DM12783P4 | 0.51694494 | -1.0911897 | -1.2281314 | -1.1236341 |             |                |
| DM10655P2 | 0.5171976  | -1.0431707 | -1.2566861 | 1.3885018  |             |                |
| DM08930P4 | 0.51723194 | -1.1436079 | -1.7058082 | -1.0949951 |             |                |
| DM08491P1 | 0.5172413  | -1.0349904 | -1.0339925 | 1.1039969  |             |                |
| DM04278P4 | 0.5172811  | 1.1048374  | -1.3575692 | 1.0489917  |             |                |
| DM07648P2 | 0.51736593 | 1.2390797  | 1.5113322  | 1.395575   |             |                |
| DM14787P1 | 0.51747495 | -1.0540973 | 1.0459794  | -1.0706781 |             |                |
| DM12226P1 | 0.5174971  | 1.0516584  | -1.3387291 | 1.1291665  |             |                |
| DM05590P3 | 0.5176196  | 1.2278289  | 1.0661923  | 1.1910084  |             |                |
| DM13343P2 | 0.51765156 | -1.0021534 | -1.2198081 | 1.0608699  | ISCW_ISCWC  | XM_002408766.1 |
| DM00922P2 | 0.5177064  | 1.1951652  | -1.0219631 | 1.054363   | LOC727425   | XM_001123134.1 |
| DM13308P1 | 0.5178263  | -1.0884988 | -1.0170095 | -1.2046773 |             |                |
| DM03167P3 | 0.5178357  | -1.0666803 | -1.2946131 | -1.2751791 |             |                |
| DM13259P2 | 0.51783764 | -1.1855308 | 1.1431137  | 1.0429317  |             |                |
| DM05383P2 | 0.5179619  | 1.0335987  | -1.1941435 | 1.0373166  |             |                |
| DM04401P3 | 0.51806855 | 1.0720172  | -1.0568893 | 1.1394128  |             |                |
| DM06031P1 | 0.5180755  | 1.1161678  | 1.5198426  | 1.2628914  | AAEL_AAEL0C | XM_001649991.1 |
| DM05971P3 | 0.5183161  | -1.0185912 | 1.0050093  | 1.0721788  | B0272.4     | NM_077182.1    |
| DM05317P3 | 0.5183466  | 1.1129452  | 1.0604031  | 1.0720826  |             |                |
| DM14095P3 | 0.5183601  | -1.2579963 | -1.1885613 | -1.0754321 |             |                |
| DM09026P3 | 0.51840717 | 1.1095201  | -1.0010587 | 1.4092141  |             |                |
| DM10189P1 | 0.5185461  | -1.2049491 | -1.4023775 | 1.135157   |             |                |
| DM13843P3 | 0.5185509  | -1.1010557 | -1.1235151 | -1.2654269 |             |                |
| DM11946P3 | 0.51855785 | 1.1841618  | -1.037445  | 1.2209966  |             |                |
| DM04607P1 | 0.518579   | -1.0975876 | 1.2089452  | -1.0495307 |             |                |
| DM01604P3 | 0.5185927  | 1.104073   | 1.1227951  | 1.5609639  | OBST-A      | NM_134534.2    |
| DM08558P1 | 0.5187323  | -1.2538636 | -1.0234739 | -1.0786188 |             |                |
| DM14126P3 | 0.5187382  | 1.0604864  | 1.1712129  | 1.1393591  |             |                |
| DM06472P1 | 0.5190075  | -1.1441925 | -1.440325  | 1.1589396  | CUTICLE PRO | XM_001659414.1 |
| DM10533P2 | 0.51915395 | 1.0949486  | 1.1184369  | 1.0219707  |             |                |
| DM01729P3 | 0.51927584 | -1.1117245 | 1.0054961  | 1.1297386  | EIF2C1      | XM_532563.2    |
| DM02894P2 | 0.5194862  | -1.0424266 | -1.0502291 | 1.0911993  |             |                |
| DM13695P2 | 0.519518   | 1.0009373  | 1.2948624  | 1.2307158  |             |                |
| DM10874P1 | 0.51957494 | -1.1412066 | -1.0971838 | 1.1148098  | DMOJ\GI194  | XM_002004708.1 |
| DM08415P1 | 0.51974595 | 1.2799926  | -1.1705886 | -1.0156199 |             |                |
| DM10653P1 | 0.51975924 | 1.0517776  | 1.0826616  | -1.0109942 |             |                |
| DM02557P1 | 0.5197771  | 1.0150858  | -1.0112231 | -1.0376852 | RPS16       | NM_001033624.1 |
| DM12869P2 | 0.5197974  | 1.4984069  | -1.0812308 | -1.3484592 |             |                |
| DM14213P1 | 0.5198432  | 1.5181578  | 1.279298   | 1.1907486  |             |                |
| DM05371P4 | 0.52021456 | 1.0153717  | -1.1224886 | -1.1132386 |             |                |
| DM08585P3 | 0.5203125  | 1.0208143  | 1.0132104  | -1.0741574 |             |                |
| DM04188P2 | 0.5203784  | 1.0920715  | 1.3993036  | -1.0553759 | DVIR\GJ2443 | XM_002054372.1 |
| DM04935P3 | 0.52040505 | 1.2698281  | -1.1919323 | -1.0194744 |             |                |

|            |            |            |            |            |              |                |
|------------|------------|------------|------------|------------|--------------|----------------|
| DM07393P3  | 0.5204234  | -1.0826149 | -1.1879004 | 1.003014   |              |                |
| DM12805P2  | 0.52044326 | -1.2093164 | -1.6693162 | -1.2368493 |              |                |
| DM111100P1 | 0.52050436 | 1.0807557  | 1.4413757  | 1.2085811  |              |                |
| DM13589P2  | 0.5205314  | 1.0349852  | 1.2318588  | 1.2854258  |              |                |
| DM08735P3  | 0.52061874 | 1.1636337  | 1.2727157  | 1.0333436  |              |                |
| DM10090P3  | 0.5212038  | -1.1492563 | 1.0604703  | -1.0702562 |              |                |
| DM15353P2  | 0.52120906 | -1.0012931 | 1.8399138  | 1.1235594  | LOC576854    | XM_777122.2    |
| DM03073P1  | 0.5212652  | 1.1281024  | 1.0237274  | -1.0326626 | CPIPJ_CPIJ01 | XM_001864448.1 |
| DM06760P1  | 0.5212774  | 1.1855773  | -1.4156101 | 1.1906298  |              |                |
| DM10055P1  | 0.5213795  | -1.2324017 | -1.1331993 | -1.1184837 |              |                |
| DM03254P4  | 0.52144396 | 1.0733863  | 1.0405861  | -1.0400844 | PXT          | NM_142391.4    |
| DM12693P3  | 0.52146035 | 1.0328277  | 1.3535824  | 1.0828474  |              |                |
| DM07933P3  | 0.52146536 | -1.2114921 | -1.0793391 | -1.0526457 |              |                |
| DM02470P2  | 0.5214697  | 1.0404305  | -1.017841  | 1.2914512  |              |                |
| DM02604P2  | 0.5216741  | -1.079953  | 1.0434468  | -1.0875667 | LOC656941    | XM_963435.1    |
| DM14635P3  | 0.5216795  | 1.0337301  | 1.0090908  | 1.1158224  |              |                |
| DM04908P1  | 0.5218168  | -1.4655583 | -1.0541061 | 1.0035651  |              |                |
| DM09865P3  | 0.5218245  | -1.0047332 | 1.102333   | -1.0081714 |              |                |
| DM08948P2  | 0.5218448  | -1.0544614 | -1.0970957 | 1.1349436  |              |                |
| DM09873P2  | 0.52185684 | -1.4625695 | 1.0398122  | 1.0110034  |              |                |
| DM09141P1  | 0.52194864 | -1.143253  | 1.0073408  | -1.0441754 |              |                |
| DM00231P3  | 0.52209145 | -1.1033508 | -1.0777186 | -1.2617166 | LOC1001137   | XM_001600081.1 |
| DM04005P1  | 0.52213407 | 1.0939541  | 1.0821539  | 1.0570438  |              |                |
| DM11774P3  | 0.52233243 | 1.0441078  | -1.0721425 | 1.0940629  |              |                |
| DM02907P1  | 0.52236307 | -1.1757168 | -1.0727471 | -1.0601538 |              |                |
| DM04092P3  | 0.5223764  | -1.0032012 | -1.1481417 | -1.1217316 |              |                |
| DM01357P1  | 0.5225416  | 1.1378343  | 1.0506537  | 1.0722268  |              |                |
| DM06765P4  | 0.5225462  | -1.1289272 | -1.1926299 | -1.3022658 |              |                |
| DM00171P3  | 0.5225755  | 1.0453259  | -1.0830028 | 1.0673666  | ISCW_ISCWC   | XM_002416222.1 |
| DM04818P3  | 0.5226046  | -1.2537118 | -1.4208678 | -1.1490626 |              |                |
| DM13799P2  | 0.5227151  | -1.0165354 | 1.0566386  | -1.0657468 |              |                |
| DM07186P1  | 0.52271813 | 1.1487148  | 1.2806401  | -1.0840224 |              |                |
| DM07053P2  | 0.52273476 | 1.0071644  | -1.115688  | 1.0489763  |              |                |
| DM06109P3  | 0.52277505 | 1.0165609  | -1.0864695 | -1.1179357 | DMOJ\GI119   | XM_002008144.1 |
| DM02369P2  | 0.52300507 | 1.1280648  | 1.2909741  | 1.2596569  |              |                |
| DM12235P3  | 0.5231071  | 1.011336   | -1.2477808 | -1.2047899 |              |                |
| DM04252P2  | 0.5234016  | -1.0689664 | -1.0590993 | -1.1340284 |              |                |
| DM00843P1  | 0.5235591  | 1.0080003  | 1.0408007  | -1.0607814 | DWIL\GK166   | XM_002062449.1 |
| DM00760P1  | 0.52358687 | 1.0967077  | 1.0655434  | 1.2053329  | USP2         | NM_001142050.1 |
| DM06500P2  | 0.5235965  | 1.1666563  | 1.1557221  | 1.0745826  |              |                |
| DM03797P2  | 0.5237738  | -1.0768318 | 1.1536996  | 1.1274304  | DPSE\GA100   | XM_001357982.2 |
| DM14893P1  | 0.52397466 | -1.0442882 | -1.2461301 | -1.0517554 |              |                |
| DM11661P2  | 0.5240073  | 1.0292401  | 1.0054132  | -1.101068  |              |                |
| DM09445P1  | 0.52406013 | 1.1799037  | -1.083066  | 1.0616817  |              |                |
| DM08406P3  | 0.5242066  | -1.0599809 | -1.4138365 | -1.1085396 |              |                |
| DM06405P1  | 0.52427125 | 1.1463825  | 1.553403   | 1.1941215  | LOC1001657   | NM_001134286.1 |
| DM09637P1  | 0.5245275  | 1.1556064  | 1.0119156  | 1.143046   |              |                |
| DM14824P3  | 0.5245613  | -1.0721692 | -1.0634612 | 1.1261705  |              |                |
| DM05351P1  | 0.5245705  | -1.0990509 | -1.2394315 | -1.2712996 |              |                |
| DM08966P1  | 0.52458036 | 1.0047072  | -1.0179619 | -1.2857322 |              |                |

|            |            |            |            |            |                            |
|------------|------------|------------|------------|------------|----------------------------|
| DM12671P1  | 0.5247709  | -1.0123048 | 1.0129588  | 1.094003   |                            |
| DM11639P2  | 0.52483785 | -1.0941652 | -1.0178479 | -1.084042  |                            |
| DM01984P3  | 0.52486897 | -1.0328132 | -1.2013093 | 1.0389639  | DSIM\GD195\XM_002102404.1  |
| DM111150P1 | 0.5249589  | -1.0284133 | 1.0446486  | 1.1877207  |                            |
| DM06411P1  | 0.5250098  | -1.0128162 | -1.0567425 | 1.1284077  |                            |
| DM13082P1  | 0.5253089  | 1.1847739  | 1.1193056  | 1.2815454  |                            |
| DM07457P1  | 0.5253124  | 1.0392057  | 1.043306   | 1.1187056  |                            |
| DM04608P2  | 0.5253574  | 1.0461873  | 1.5129939  | 1.1885517  | DWIL\GK110\XM_002070358.1  |
| DM01797P4  | 0.525418   | -1.2288175 | -1.2524514 | -1.112773  | RBCN XM_001657781.1        |
| DM06545P2  | 0.5254827  | -1.2042776 | 1.2924767  | 1.0434312  |                            |
| DM15324P3  | 0.5254847  | 1.2445304  | 1.3649173  | 1.011995   |                            |
| DM09785P3  | 0.5255587  | 1.0073575  | -1.0283325 | 1.126279   |                            |
| DM12103P2  | 0.5256636  | 1.1718324  | 1.1236717  | 1.3034286  | DVIR\GJ1447 XM_002051076.1 |
| DM07827P1  | 0.5257334  | -1.0020779 | 1.0071597  | 1.0808401  |                            |
| DM12088P3  | 0.5258364  | 1.5304146  | 1.1850296  | 1.354543   |                            |
| DM08973P1  | 0.52593833 | -1.055553  | -1.0012214 | 1.129874   |                            |
| DM07183P2  | 0.5259768  | 1.0913477  | 1.2450532  | 1.1452322  |                            |
| DM10029P2  | 0.5260053  | 1.0789671  | 1.3093532  | 1.084418   |                            |
| DM03306P3  | 0.52603275 | 1.2754058  | 1.0474558  | -1.2427756 | BRAFLDRAFT_XM_002593550.1  |
| DM11516P1  | 0.52604747 | -1.0399904 | -1.0571762 | -1.1480957 |                            |
| DM03041P1  | 0.5261533  | -1.1495131 | -1.111841  | -1.1550303 | BRAFLDRAFT_XM_002586200.1  |
| DM03712P1  | 0.52619594 | 1.1166006  | 1.1954739  | 1.1667335  | DSEC\GM104 XM_002038669.1  |
| DM13569P1  | 0.5263845  | 1.0211111  | 1.0427876  | 1.1804026  |                            |
| DM05566P3  | 0.5265605  | 1.0513942  | 1.2153771  | 1.2049813  |                            |
| DM07755P3  | 0.526604   | -1.2187896 | -1.1008465 | 1.0391871  |                            |
| DM01510P1  | 0.52672225 | -1.0092251 | -1.0395548 | 1.000656   |                            |
| DM08261P3  | 0.5268027  | 1.1569108  | -1.1232646 | 1.1113937  |                            |
| DM10637P3  | 0.52687675 | 1.0751048  | -1.1454283 | 1.1115307  |                            |
| DM13899P2  | 0.527041   | -1.0454077 | 1.1543745  | 1.3560106  |                            |
| DM07456P1  | 0.52704805 | 1.1042504  | 1.0772644  | 1.1896636  |                            |
| DM12879P3  | 0.5271085  | 1.0763268  | 1.0354207  | 1.1655761  |                            |
| DM04555P3  | 0.52714306 | 1.5215799  | 1.6046107  | -1.1011826 |                            |
| DM01150P2  | 0.5271993  | -1.0296564 | 1.0549164  | 1.074939   | LOC575675 XM_776062.2      |
| DM08252P1  | 0.5273801  | 1.1781781  | -1.141836  | -1.0775669 |                            |
| DM12939P1  | 0.52740127 | -1.0812217 | 1.1108     | -1.098736  |                            |
| DM10906P1  | 0.52762055 | 1.1499707  | 1.0083747  | 1.0350313  |                            |
| DM04452P3  | 0.52777505 | 1.0274471  | 1.0901341  | 1.2547891  |                            |
| DM08017P3  | 0.52777857 | -1.15344   | -1.0324777 | -1.1086749 |                            |
| DM14120P1  | 0.5278224  | 1.0652789  | 1.0479013  | -1.3336476 |                            |
| DM09863P2  | 0.52784216 | 1.0743656  | -1.0402331 | 1.101708   |                            |
| DM07236P4  | 0.52785033 | 1.046024   | 1.1032565  | -1.2179021 |                            |
| DM02759P2  | 0.52792996 | -1.1690383 | 1.0389543  | -1.1434585 | LOC726494 XM_001122226.1   |
| DM10471P1  | 0.5280147  | -1.0666308 | 1.070873   | 1.0575548  |                            |
| DM11748P2  | 0.52803826 | 1.0336044  | 1.2726531  | 1.2499367  |                            |
| DM15133P3  | 0.5281329  | -1.11963   | -1.2929622 | -1.0025475 |                            |
| DM05723P2  | 0.5281928  | 1.1910955  | 1.1966033  | 1.2724867  |                            |
| DM10681P2  | 0.52819437 | 1.2375898  | 1.0232536  | -1.1091089 |                            |
| DM14742P2  | 0.52821106 | -1.350368  | -1.2350243 | -1.6894317 |                            |
| DM03118P1  | 0.52834696 | 1.0474653  | -1.0285754 | -1.0983955 |                            |
| DM15396P1  | 0.5284308  | 1.1042638  | 1.0930691  | 1.1354682  |                            |

|           |            |            |            |            |             |                |
|-----------|------------|------------|------------|------------|-------------|----------------|
| DM08411P1 | 0.52844363 | -1.1021234 | 1.1302335  | -1.0698493 |             |                |
| DM00566P1 | 0.5284786  | 1.0409523  | 1.040065   | -1.0548149 | DWIL\GK130  | XM_002073492.1 |
| DM14764P2 | 0.52853346 | -1.2204856 | 1.234043   | -1.0424808 |             |                |
| DM02250P3 | 0.52859974 | -1.0658385 | -1.1285653 | -1.0401951 | LOC1001655  | XM_001950795.1 |
| DM11821P1 | 0.52859974 | 1.0507323  | 1.2188978  | 1.1531261  |             |                |
| DM12346P3 | 0.52876276 | 1.0549     | -1.0836715 | -1.0961589 |             |                |
| DM06890P1 | 0.5288434  | -1.0650259 | -1.0271364 | 1.0320635  |             |                |
| DM01951P2 | 0.5288751  | 1.3090152  | 1.3575339  | 1.2459058  | DWIL\GK226  | XM_002072005.1 |
| DM00933P1 | 0.5289011  | 1.1959187  | -1.0272739 | 1.2084785  | ECE1        | XM_001654791.1 |
| DM08230P1 | 0.5289994  | -1.1309619 | -1.0277758 | -1.0755512 |             |                |
| DM12826P2 | 0.5290126  | 1.1818175  | 1.0103451  | -1.1091039 |             |                |
| DM14900P1 | 0.5291098  | 1.3296518  | 1.0233864  | 1.3854967  |             |                |
| DM11176P2 | 0.5292436  | -1.2543035 | -2.241541  | 1.1251924  |             |                |
| DM06343P3 | 0.52930397 | -1.0679535 | 1.021013   | 1.1490358  |             |                |
| DM04130P1 | 0.5293084  | 1.2095944  | -1.0006253 | -1.038386  | ATP1A1B     | NM_131690.1    |
| DM14963P3 | 0.52946883 | -1.0980384 | 1.0176812  | -1.0741762 | MRPS10      | NM_001159988.1 |
| DM07223P1 | 0.5296384  | 1.0922574  | -1.0294197 | 1.1093127  |             |                |
| DM04933P3 | 0.5297251  | 1.0081018  | 1.1692339  | -1.0998735 |             |                |
| DM07915P2 | 0.5297436  | -1.002842  | -1.0872295 | 1.1638696  |             |                |
| DM05116P2 | 0.52985144 | -1.0142449 | 1.115393   | -1.014269  |             |                |
| DM03015P2 | 0.5299304  | -1.0321162 | -1.0851765 | -1.1544077 | POLR2D      | NM_027002.3    |
| DM00263P3 | 0.52993107 | 1.1689644  | 1.1512276  | 1.1461899  | BRAFLDRAFT  | XM_002593637.1 |
| DM01003P2 | 0.5299933  | -1.1661408 | 1.0511916  | -1.0206987 | LOC660900   | XM_967097.1    |
| DM03083P4 | 0.53019536 | -1.0508599 | 1.0494927  | 1.0432636  |             |                |
| DM06262P1 | 0.5302558  | 2.241704   | 1.3063749  | -2.7335072 | CP3         | XM_001949845.1 |
| DM05343P2 | 0.5303688  | -1.1300297 | -1.5162169 | 1.062403   |             |                |
| DM11329P1 | 0.5303743  | 1.0268466  | 1.065059   | -1.0707581 |             |                |
| DM04210P3 | 0.5304628  | 1.1662349  | 1.4065121  | 1.2100384  |             |                |
| DM14837P2 | 0.53051203 | 1.1130883  | -1.02407   | 1.0124248  |             |                |
| DM06018P1 | 0.53058153 | -1.1239471 | -1.1000959 | -1.0224687 | DWIL\GK135  | XM_002072692.1 |
| DM02947P3 | 0.5307383  | -1.1093974 | 1.1022917  | 1.09168    | BIRC2       | NM_001048023.1 |
| DM03692P2 | 0.5311642  | -1.1920358 | 1.0153936  | 1.1339152  |             |                |
| DM01719P3 | 0.5312599  | 1.5919133  | 1.3828131  | 1.1344413  |             |                |
| DM01853P1 | 0.53131294 | 1.0595738  | -1.0888971 | -1.0399561 |             |                |
| DM14998P3 | 0.5313407  | -1.1554891 | 1.2317252  | 1.5117633  |             |                |
| DM13363P1 | 0.5314059  | -1.100037  | -1.0871732 | -1.0406138 |             |                |
| DM01710P2 | 0.5314764  | 1.0156361  | 1.0894246  | 1.099532   | LOC579018   | XM_779153.2    |
| DM07094P3 | 0.5315102  | 1.251088   | -1.0532397 | -1.134357  |             |                |
| DM14329P4 | 0.53159    | 1.105941   | 1.1444882  | 1.1332694  |             |                |
| DM01900P1 | 0.53191596 | 1.015475   | -1.031908  | 1.0324613  | DPSE\GA148  | XM_001358967.2 |
| DM11576P2 | 0.532352   | -1.0011535 | -1.1551082 | 1.3555707  |             |                |
| DM00333P4 | 0.53238827 | 1.002524   | -1.1261911 | -1.1154381 | RAB6        | NM_001161967.1 |
| DM12677P2 | 0.53239685 | -1.0151435 | -1.0075228 | 1.1578907  |             |                |
| DM06111P2 | 0.53241193 | 1.0239956  | 1.2328852  | 1.0486424  | NEMVEDRAFT  | XM_001639582.1 |
| DM07277P3 | 0.5324404  | -1.0662864 | -1.4456928 | 1.0312774  |             |                |
| DM15150P3 | 0.532659   | -1.3558354 | -1.3423228 | -1.4970325 |             |                |
| DM12936P1 | 0.53273666 | -1.0076541 | 1.0430373  | 1.123527   |             |                |
| DM04392P3 | 0.5327791  | 1.0242523  | 1.0490142  | 1.0754277  | STAT92E-LIK | XM_397181.3    |
| DM07047P2 | 0.5328154  | 1.1453128  | -1.0584086 | -1.0085194 |             |                |
| DM12969P1 | 0.53285193 | 1.0219349  | 1.0439911  | 1.0962538  |             |                |

|           |            |            |            |            |                             |
|-----------|------------|------------|------------|------------|-----------------------------|
| DM07813P1 | 0.5330256  | -1.101102  | -1.0280486 | -1.127118  |                             |
| DM10592P3 | 0.5330575  | 1.0042065  | -1.0257958 | -1.0702578 |                             |
| DM09377P1 | 0.5332295  | -1.1043706 | 1.0572956  | -1.1204559 |                             |
| DM08596P2 | 0.5332696  | 1.5169984  | 1.3386348  | 1.0427696  |                             |
| DM05899P1 | 0.5333608  | 1.0022752  | -1.4877862 | 1.117888   | LOC582286 XM_782245.2       |
| DM01811P3 | 0.5333696  | 1.1016017  | 1.0666229  | 1.1691974  | AAEL_AAEL0C XM_001652225.1  |
| DM12417P1 | 0.53338444 | 1.0775658  | -1.0171672 | 1.0035353  |                             |
| DM02332P2 | 0.5334097  | -1.1112715 | -1.0313545 | 1.1134468  |                             |
| DM05805P3 | 0.53349274 | 1.1417258  | 1.0047468  | 1.025025   | TRIADDRAFT_XM_002111452.1   |
| DM08147P2 | 0.5335773  | 1.0500287  | 1.1040608  | 1.0084842  |                             |
| DM06402P1 | 0.5337361  | -1.0291601 | 1.083722   | -1.0674307 | DYAK\GE254' XM_002096070.1  |
| DM11112P1 | 0.53385574 | 1.1894553  | 1.0263426  | 2.1335497  |                             |
| DM05884P3 | 0.53392327 | 1.0321714  | 1.1456957  | 1.039147   |                             |
| DM00575P2 | 0.5339844  | -1.0929195 | 1.2298825  | -1.0633544 | CPIPJ_CPIJ01 XM_001851443.1 |
| DM13841P3 | 0.53419006 | 1.0227199  | 1.2403331  | 1.0692412  |                             |
| DM14006P1 | 0.5345289  | -1.0767642 | 1.0178246  | -1.1929504 |                             |
| DM09707P1 | 0.53456706 | -1.0540645 | 1.0433879  | 1.0624512  |                             |
| DM01607P2 | 0.53457344 | -1.1229638 | -1.1342779 | 1.0593393  | NDUFS8 NM_001162323.1       |
| DM13617P3 | 0.5346014  | 1.0178394  | -1.2969407 | -1.1510545 |                             |
| DM08844P1 | 0.53461736 | -1.1314867 | -1.1437525 | -1.0659457 |                             |
| DM10287P3 | 0.5348619  | 1.1501824  | -1.2491013 | 1.3223735  |                             |
| DM03961P1 | 0.53487366 | -1.007225  | -1.0986288 | 1.0747187  |                             |
| DM04209P2 | 0.5348743  | 1.0826285  | 1.0623803  | -1.2312423 | AGAP_AGAP0 XM_318679.4      |
| DM05680P2 | 0.53488386 | 1.0031205  | 1.1188238  | -1.1778812 |                             |
| DM11414P3 | 0.5350116  | 1.0105339  | 1.0465654  | 1.1124526  |                             |
| DM13423P2 | 0.5353084  | -1.0533624 | 1.0746813  | -1.107245  | LOC1001198' XM_001603545.1  |
| DM06125P1 | 0.5353084  | -1.0321968 | -1.1215161 | -1.0157896 | LOC659663 XM_965949.2       |
| DM04790P1 | 0.53538096 | 1.5901265  | 1.8519661  | -1.0143443 |                             |
| DM08021P1 | 0.53559375 | 1.1637603  | 1.147933   | 1.0562255  |                             |
| DM13544P2 | 0.5357953  | -1.0019251 | 1.0290719  | -1.4354374 |                             |
| DM08952P3 | 0.5358428  | -1.1079714 | -1.1668245 | -1.0259655 |                             |
| DM04489P2 | 0.53590715 | 1.1713908  | -1.1262524 | -1.0527508 |                             |
| DM09013P1 | 0.53596336 | -1.0332162 | -1.1003253 | 1.2892646  |                             |
| DM01601P3 | 0.5360579  | -1.0397938 | -1.079964  | -1.0958763 | DVIR\GJ1674 XM_002051617.1  |
| DM01782P2 | 0.5362473  | -1.000328  | -1.021646  | 1.0862976  | LOC1000561' XM_001502988.2  |
| DM10004P3 | 0.536276   | -1.0097182 | 1.0011971  | -1.2102036 |                             |
| DM05201P3 | 0.53627664 | -1.1238446 | 1.4881104  | 1.0051441  |                             |
| DM04899P2 | 0.5363344  | -1.0475754 | -1.1274934 | 1.0114399  |                             |
| DM03614P1 | 0.5365734  | -1.0704277 | -1.2340273 | -1.1906755 | DSEC\GM158 XM_002039714.1   |
| DM08568P3 | 0.5366996  | 1.9243844  | 1.3412099  | 1.1630157  |                             |
| DM09628P3 | 0.53685623 | -1.0576358 | -1.0313761 | -1.1136854 | LOC1000850' XM_001515436.1  |
| DM08084P4 | 0.536938   | -1.0965384 | -1.0454313 | -1.020047  |                             |
| DM02702P2 | 0.53695357 | -1.0096743 | -1.0080996 | -1.1183126 | CNOT7 NM_001006454.1        |
| DM14864P3 | 0.53699493 | -1.0599377 | -1.0500451 | 1.1536813  |                             |
| DM10977P1 | 0.53704715 | 1.0290577  | 1.0895541  | -1.1166486 |                             |
| DM03482P3 | 0.53721654 | -1.2129923 | -1.0428855 | -1.38135   | AAEL_AAEL0C XM_001658931.1  |
| DM12004P2 | 0.5374629  | 1.1371117  | 1.1621884  | 1.047113   |                             |
| DM10837P2 | 0.5376163  | -1.265702  | -1.1008385 | -1.1515976 |                             |
| DM02631P2 | 0.5376737  | -1.1695297 | -1.230696  | 1.0092363  | DSEC\GM180 XM_002037815.1   |
| DM04201P1 | 0.5377093  | 1.0235085  | 1.1469983  | 1.1742028  |                             |

|           |            |            |            |            |                           |
|-----------|------------|------------|------------|------------|---------------------------|
| DM15196P2 | 0.53795755 | 1.3639764  | 1.2083697  | 1.4398173  |                           |
| DM01140P2 | 0.5383169  | -1.0063423 | 1.0740035  | 1.1679301  | AGAP_AGAP0 XM_315029.3    |
| DM14627P2 | 0.53833246 | -1.0949595 | -1.42818   | -1.0661038 |                           |
| DM08577P1 | 0.5383454  | -1.002853  | -1.0967209 | -1.0694717 |                           |
| DM10713P2 | 0.5384251  | -1.2777207 | -1.3246015 | -1.064622  |                           |
| DM12201P2 | 0.5384994  | -1.1859875 | 1.1438162  | -1.4032464 |                           |
| DM05987P2 | 0.53874856 | 1.0969622  | -1.1084224 | -1.166378  | LOC1000089:NM_001082173.1 |
| DM00141P3 | 0.5388049  | -1.0306696 | 1.0767936  | -1.0314258 | LOC1001190:XM_001602849.1 |
| DM05753P3 | 0.5388434  | -1.0833825 | -1.2590894 | -1.1486804 |                           |
| DM14890P2 | 0.5388993  | 1.0725138  | 1.1355636  | -1.1748943 |                           |
| DM05847P3 | 0.539071   | -1.1158679 | -1.0624471 | -1.1860328 | GALK XM_001650025.1       |
| DM12411P1 | 0.53913474 | 1.2487016  | 1.0119519  | 1.160857   |                           |
| DM14741P3 | 0.53913563 | 1.0659931  | -1.1782632 | 1.2438693  |                           |
| DM15001P1 | 0.5393221  | 1.4121059  | 1.2439884  | 1.0307617  |                           |
| DM03599P2 | 0.5394123  | -1.0065286 | 1.1249564  | 1.088467   |                           |
| DM02436P2 | 0.5396193  | 1.1103982  | -1.2969167 | 1.2642621  |                           |
| DM02105P3 | 0.5398315  | -1.1490396 | -1.0901386 | -1.292632  | LOC1001994:XM_002160017.1 |
| DM00711P1 | 0.5401026  | 1.1081973  | 1.0070617  | 1.0591248  | PRKC XM_001652359.1       |
| DM05521P3 | 0.5402077  | 1.011      | -1.0876188 | 1.092777   |                           |
| DM09752P4 | 0.5403163  | 1.1160842  | 1.0259013  | 1.0513672  |                           |
| DM12880P2 | 0.54039097 | -1.0544624 | -1.0317265 | -1.0553713 |                           |
| DM05022P3 | 0.54071134 | 1.0138147  | 1.07392    | -1.0614294 | LOC656418 XM_962951.1     |
| DM01239P1 | 0.5407495  | 1.0026412  | -1.136781  | -1.1231079 |                           |
| DM09805P2 | 0.5407977  | 1.1470405  | 1.5214524  | 1.4554447  |                           |
| DM08764P1 | 0.54085255 | -1.1267481 | 1.0147691  | -1.196337  |                           |
| DM08295P1 | 0.5409541  | -1.066004  | -1.1024114 | 1.2863965  |                           |
| DM03866P1 | 0.54104453 | -1.2634219 | -1.0957525 | -1.418668  | LOC409822 XM_393312.3     |
| DM01351P3 | 0.541055   | 1.073608   | -1.0590124 | 1.1372136  | LOC409424 XM_392938.3     |
| DM10367P4 | 0.54118043 | 1.2955598  | 1.2023062  | 1.5217608  |                           |
| DM13389P2 | 0.5413432  | 1.0018559  | -1.3232514 | 1.1215571  |                           |
| DM04397P1 | 0.5414298  | 1.146219   | 1.1630412  | -1.1617271 |                           |
| DM08377P1 | 0.5414385  | -1.0134383 | -1.167077  | -1.0523119 |                           |
| DM04554P2 | 0.5416304  | 1.1142596  | -1.1932452 | 1.5595804  | DPSE\GA232:XM_002135689.1 |
| DM07645P1 | 0.5416373  | 1.057498   | -1.7249368 | -1.1463811 |                           |
| DM09553P1 | 0.5416757  | -1.0445639 | 1.0767215  | -1.1055465 |                           |
| DM00783P2 | 0.5418664  | 1.0658741  | -1.1988711 | 1.1342303  |                           |
| DM01465P2 | 0.5419346  | -1.1191361 | -1.0273937 | 1.0964131  | TC00.104705 XM_801945.1   |
| DM00579P1 | 0.54202616 | 1.0056709  | -1.073823  | 1.0163177  | LOC1001221:XM_001605710.1 |
| DM13708P2 | 0.5420338  | 1.0352995  | 1.2899412  | 1.1380608  |                           |
| DM11467P3 | 0.54205364 | -1.0330708 | -1.2736996 | -1.2727175 |                           |
| DM12678P1 | 0.542133   | -1.035123  | -1.0285629 | -1.1062098 |                           |
| DM14491P1 | 0.5421397  | -1.0445296 | 1.0679923  | 1.1438581  |                           |
| DM00200P3 | 0.54218775 | -1.0526044 | -1.1049062 | -1.0949088 | ECH1 NM_001005704.1       |
| DM08661P1 | 0.54255784 | -1.0950084 | 1.1382953  | 1.0720091  |                           |
| DM03342P2 | 0.542633   | -1.1269006 | 1.0546974  | -1.0610368 | LOC1001239:XM_001607650.1 |
| DM10682P2 | 0.54280066 | -1.2016399 | -1.2203788 | -1.475442  |                           |
| DM09158P3 | 0.54284585 | 1.1304615  | -1.1658542 | -1.038498  |                           |
| DM04355P3 | 0.542948   | -1.1947534 | -1.0522852 | -1.3540069 |                           |
| DM14344P1 | 0.5431641  | 1.065674   | 1.1362664  | -1.0326508 | BRAFLDRAFT_XM_002591587.1 |
| DM10492P1 | 0.54317707 | 1.0180669  | -1.2190711 | -1.0195096 |                           |

|           |            |            |            |            |              |                |
|-----------|------------|------------|------------|------------|--------------|----------------|
| DM07890P1 | 0.5434538  | 1.102607   | -1.0631188 | -1.0955125 |              |                |
| DM03252P2 | 0.54366237 | 1.0772603  | 1.079576   | 1.0228792  |              |                |
| DM05751P3 | 0.54389626 | -1.0353943 | 1.0733032  | 1.0622467  |              |                |
| DM07388P3 | 0.5439758  | -1.1293312 | 1.291881   | 1.0166016  |              |                |
| DM10930P1 | 0.54400754 | 1.1030747  | 1.1346954  | 1.2150506  |              |                |
| DM02818P3 | 0.54408526 | -1.001228  | 1.0139798  | 1.0937443  | RPL36        | NM_166855.1    |
| DM03580P1 | 0.54413474 | -1.1856992 | -1.0397784 | 1.0119025  |              |                |
| DM08404P1 | 0.5441461  | -1.1201978 | -1.038873  | -1.090814  |              |                |
| DM08853P1 | 0.544147   | 1.1182073  | -1.1178728 | 1.6411126  |              |                |
| DM06374P1 | 0.5441493  | -1.207202  | -1.1103039 | 1.0736876  | CP17         | NM_001172262.1 |
| DM12498P2 | 0.5442205  | 1.004465   | -1.1062361 | -1.1390827 |              |                |
| DM12790P1 | 0.5442982  | 1.0189332  | 1.0017065  | 1.2402155  |              |                |
| DM10136P2 | 0.5443676  | -1.1955818 | 1.0648187  | -1.0428876 |              |                |
| DM13991P3 | 0.5443842  | 1.1304009  | -1.280843  | 1.2090058  |              |                |
| DM15128P3 | 0.5444395  | 1.4130887  | 1.1537917  | 1.3492509  |              |                |
| DM01125P3 | 0.54447156 | 1.1908336  | 1.1100897  | 1.0905377  | NEMVEDRAFT   | XM_001638907.1 |
| DM06970P3 | 0.5445139  | -1.1708404 | -1.185468  | -1.1999222 |              |                |
| DM12462P3 | 0.5445484  | 1.0346963  | 1.0150794  | 1.1175766  |              |                |
| DM12263P3 | 0.5445759  | -1.0974611 | -1.0580342 | 1.0203508  |              |                |
| DM01082P4 | 0.5447686  | -1.0063808 | -1.1444951 | -1.1159071 | AAEL_AAELOC  | XM_001653959.1 |
| DM01265P3 | 0.54482126 | 1.0615094  | -1.0391611 | -1.0624262 | LOC587847    | XM_787557.2    |
| DM07789P1 | 0.544834   | -1.0883787 | 1.2757478  | 1.0891321  |              |                |
| DM08367P2 | 0.5448551  | 1.0458951  | 1.1311443  | -1.0964705 |              |                |
| DM06559P1 | 0.54499763 | 1.0390279  | -1.0398407 | 1.1690321  | E1012E08.TM  | XM_001238746.1 |
| DM08858P2 | 0.5453368  | 1.0612257  | -1.0275594 | -1.1588132 |              |                |
| DM08155P2 | 0.54539305 | 1.005518   | 1.3243247  | 1.1801605  |              |                |
| DM07682P1 | 0.54551435 | -1.1075321 | -1.0432014 | 1.0848267  |              |                |
| DM06785P4 | 0.5456926  | 1.3332512  | 1.2699505  | 1.1361748  |              |                |
| DM06329P3 | 0.54573005 | 1.3472587  | 1.7849375  | 1.1011329  | PB103351.00  | XM_666562.1    |
| DM05463P1 | 0.5457433  | 1.0193214  | -1.0673405 | 1.0490572  |              |                |
| DM00257P1 | 0.5457574  | 1.0363239  | -1.262293  | 1.1007092  | DSIM\GD189   | XM_002103488.1 |
| DM12663P3 | 0.54583615 | 1.1306291  | -1.0095675 | 1.017786   |              |                |
| DM04831P3 | 0.5459566  | -1.0141995 | 1.0105958  | 1.0904822  |              |                |
| DM12070P3 | 0.54609007 | 1.0620525  | -1.2186221 | -1.0927429 |              |                |
| DM01894P1 | 0.5465221  | 1.1082175  | 1.1006702  | -1.0189663 | SC5D         | NM_001140116.1 |
| DM11876P1 | 0.54664713 | -1.8016089 | -2.639563  | -1.7751269 |              |                |
| DM01427P3 | 0.5467304  | -1.04231   | -1.316546  | -1.1084373 | BRAIN CHITII | XM_001655923.1 |
| DM14949P1 | 0.5467901  | -1.0412059 | -1.1820165 | -1.2014867 | NDUFB8       | NM_001162698.1 |
| DM07059P1 | 0.5469493  | 1.103783   | -1.1655682 | -1.0741497 |              |                |
| DM07385P2 | 0.54695225 | -1.1062099 | 1.0988994  | 1.0969118  |              |                |
| DM05627P2 | 0.54697895 | -1.0764507 | -1.007903  | -1.0517777 | FAM20B       | NM_001076185.1 |
| DM04530P3 | 0.54704857 | 1.3292242  | -1.0019422 | -1.021091  |              |                |
| DM00792P4 | 0.547149   | -1.0688752 | -1.0742382 | 1.0245479  | LOC1001170!  | XM_001601341.1 |
| DM14220P1 | 0.5471559  | 1.194061   | 1.0117105  | 1.1803058  |              |                |
| DM08157P4 | 0.5471667  | 1.0726696  | -1.1829821 | 1.0668821  |              |                |
| DM10289P2 | 0.5474538  | 1.0859842  | -1.2043667 | -1.0084207 |              |                |
| DM02688P1 | 0.547532   | -1.1372958 | -1.1494697 | 1.0444328  | LOC1001614!  | NM_001163041.1 |
| DM01007P2 | 0.54772145 | 1.315382   | 1.2864801  | 1.1483521  | GPIIIA       | NM_001082066.1 |
| DM08866P2 | 0.54775965 | -1.2261579 | -1.1932201 | -1.0960128 |              |                |
| DM08548P3 | 0.54782844 | -1.056824  | -1.1899654 | -1.1057919 |              |                |



|           |            |            |            |            |                            |
|-----------|------------|------------|------------|------------|----------------------------|
| DM03108P1 | 0.5480159  | -1.0995489 | -1.0043527 | -1.1765587 | LOC1001612:XM_001952071.1  |
| DM05708P1 | 0.5480683  | -1.067683  | -1.0794232 | 1.2090515  |                            |
| DM10770P3 | 0.5483057  | -1.1068861 | -1.0770357 | -1.1053141 |                            |
| DM02824P1 | 0.54833806 | 1.1699013  | 1.1004857  | 1.1089528  | LOC1001808(XM_002120828.1  |
| DM12929P1 | 0.54839337 | -1.3457801 | -1.119158  | -1.1657602 |                            |
| DM02629P3 | 0.54844624 | -1.121028  | -1.1292511 | -1.2118858 | DSIM\GD239\XM_002079480.1  |
| DM11998P4 | 0.5485353  | 1.0405093  | 1.1551172  | 1.1695302  | LOC1001609\XM_001945161.1  |
| DM15083P2 | 0.548551   | 1.2516822  | -1.1589899 | 1.007952   |                            |
| DM10133P1 | 0.5485591  | 1.0343786  | -1.076941  | 1.2047652  |                            |
| DM07110P1 | 0.5485828  | 1.0513891  | 1.3011646  | 1.0115924  |                            |
| DM09294P1 | 0.5486642  | 1.0153425  | -1.2574124 | -1.4242929 |                            |
| DM01173P1 | 0.5487303  | -1.1716756 | 1.0592877  | 1.0414836  | DMOJ\GI208(XM_002005991.1  |
| DM10440P3 | 0.54876274 | -1.1343149 | -1.099619  | 1.0543683  |                            |
| DM03456P1 | 0.5487913  | -1.2905095 | 1.1581866  | -1.0695565 | LOC582285 XM_001182105.1   |
| DM02415P1 | 0.5488057  | 1.0015057  | 1.0672235  | 1.1022793  | DVIR\GJ1677\XM_002056847.1 |
| DM07282P3 | 0.54880995 | 1.171663   | 1.6716787  | 1.3737595  |                            |
| DM08543P1 | 0.54884374 | -1.088582  | 1.026248   | -1.1188678 |                            |
| DM03847P3 | 0.54905164 | 1.0571603  | 1.1411468  | 1.174681   | ALDH1A1/2/3\XM_002592173.1 |
| DM08455P1 | 0.5491043  | -1.0672652 | 1.0250998  | 1.0111543  |                            |
| DM05720P3 | 0.5492044  | 1.0174452  | 1.1322592  | 1.1705546  |                            |
| DM10109P2 | 0.54937863 | -1.0987595 | 1.374897   | -1.0610746 |                            |
| DM02933P3 | 0.54940724 | -1.1138862 | -1.0677198 | -1.118073  | LOC1001140:XM_001600497.1  |
| DM05610P4 | 0.5496554  | 1.1285805  | 1.1485928  | 1.2658697  |                            |
| DM13954P4 | 0.5496853  | -1.0954736 | 1.0947378  | -1.1108207 |                            |
| DM14964P2 | 0.5498328  | 1.189388   | 1.136284   | 1.2124364  | LOC1002263\XM_002187967.1  |
| DM14689P1 | 0.54983324 | -1.0231832 | -1.072026  | -1.0152472 |                            |
| DM02618P3 | 0.549906   | -1.0056651 | 1.2462884  | 1.1758044  | DSIM\GD149\XM_002077472.1  |
| DM04651P1 | 0.55001277 | -1.3512549 | -1.0990583 | -1.0222111 |                            |
| DM07415P1 | 0.55027544 | -1.1601382 | -1.1528277 | -1.1762459 |                            |
| DM12591P3 | 0.55038947 | 1.0433922  | -1.0815545 | 1.1356782  |                            |
| DM11887P2 | 0.550401   | -1.036316  | 1.0338501  | -1.1455718 |                            |
| DM05737P2 | 0.5504307  | -1.1298094 | -1.3444444 | -1.1896764 |                            |
| DM04893P2 | 0.5505393  | -1.0406919 | -1.1680123 | -1.1445225 |                            |
| DM09069P2 | 0.550659   | 1.0425519  | 1.0455806  | -1.1080273 |                            |
| DM05273P3 | 0.5507945  | 1.1735901  | 1.0576005  | -1.1081169 |                            |
| DM07898P4 | 0.5509097  | -1.2255793 | -1.1085263 | 1.0248414  |                            |
| DM08242P1 | 0.55105263 | -1.2148795 | -1.0054139 | -1.1399347 |                            |
| DM12290P2 | 0.55112076 | 1.0059677  | 1.1120083  | 1.1454086  |                            |
| DM11504P1 | 0.5512409  | 1.4066665  | -1.0902542 | 1.3577096  |                            |
| DM06901P1 | 0.5513269  | -1.1327816 | -1.097367  | 1.0676975  |                            |
| DM02135P3 | 0.5514419  | -1.0265647 | 1.0481831  | 1.1321391  | RPL-38 NM_074459.3         |
| DM11625P1 | 0.55155265 | 1.0462747  | -1.1031666 | 1.1112024  |                            |
| DM00873P3 | 0.551559   | -1.0295273 | -1.1023886 | 1.1021546  | LOC584503 XM_784362.2      |
| DM08811P1 | 0.5516199  | 1.1512921  | 1.139603   | 1.0960661  |                            |
| DM15188P1 | 0.55166185 | 1.0074961  | 1.1892022  | 1.3947147  |                            |
| DM04437P1 | 0.5516885  | 1.0757791  | -1.0680416 | 1.1644694  |                            |
| DM11206P1 | 0.55176497 | 1.2953423  | 1.0515221  | 1.1388689  |                            |
| DM06000P3 | 0.5518338  | -1.0628611 | 1.3025714  | -1.0026698 | LOC1001168(XM_001600810.1  |
| DM06726P2 | 0.5519507  | -1.1293461 | -1.0906965 | -1.5106472 |                            |
| DM10377P1 | 0.5519823  | 1.2068791  | 1.5401548  | 1.322402   |                            |

|           |            |            |            |            |                           |                |
|-----------|------------|------------|------------|------------|---------------------------|----------------|
| DM07698P2 | 0.55202043 | 2.311792   | 1.3695188  | -2.5095894 |                           |                |
| DM11747P4 | 0.5520726  | -1.0217655 | 1.0043386  | -1.1122864 |                           |                |
| DM04754P2 | 0.5521191  | -1.0354946 | -1.5024691 | -1.1902621 |                           |                |
| DM00556P1 | 0.5521432  | -1.0604504 | 1.0189785  | -1.0116969 | UBE2K                     | NM_001005662.1 |
| DM12583P2 | 0.5521505  | 1.0341783  | 1.1795216  | 1.0864047  |                           |                |
| DM12867P2 | 0.5523105  | -1.1535921 | 1.1744038  | -1.189819  |                           |                |
| DM08258P4 | 0.55243945 | -1.1184553 | -1.0201181 | -1.0612414 |                           |                |
| DM09405P3 | 0.5524415  | -1.1233417 | -1.055128  | -1.053133  | NEMVEDRAFT                | XM_001632917.1 |
| DM07511P1 | 0.5524977  | 1.0989224  | -1.1048564 | -1.1339493 |                           |                |
| DM05926P4 | 0.55260676 | 1.0543714  | 1.1221988  | 1.2779524  |                           |                |
| DM06194P3 | 0.55273396 | -1.1983179 | 1.1655868  | 1.2634169  |                           |                |
| DM12489P2 | 0.552813   | 1.1087183  | 1.2057291  | 1.1729656  |                           |                |
| DM05342P2 | 0.5528322  | 1.0093486  | -1.4573745 | -1.2546774 |                           |                |
| DM01966P2 | 0.5530547  | -1.1309606 | 1.0107158  | 1.1822374  | DPSE\GA232:XM_002135689.1 |                |
| DM07894P1 | 0.55346715 | 1.06669    | -1.0278674 | 1.0344155  |                           |                |
| DM13075P1 | 0.55354244 | 1.147041   | 1.2204846  | 1.0406326  |                           |                |
| DM14983P4 | 0.55395794 | 1.0439869  | 1.0899252  | -1.0569347 |                           |                |
| DM09058P1 | 0.5541418  | -1.1190298 | 1.0365949  | -1.0317193 |                           |                |
| DM03672P3 | 0.5542918  | 1.0460962  | 1.097231   | 1.2359575  |                           |                |
| DM03013P1 | 0.5544074  | 1.1732482  | 1.064469   | 1.0525174  | NEMVEDRAFT                | XM_001639802.1 |
| DM08224P2 | 0.55450606 | -1.2375369 | -1.0946996 | -1.1436515 |                           |                |
| DM08628P3 | 0.5545418  | 1.0063534  | 1.0456494  | -1.4544079 |                           |                |
| DM05375P3 | 0.5545644  | -1.2746067 | -1.8991548 | -1.2074654 |                           |                |
| DM13541P3 | 0.5545692  | 1.086162   | 1.1283282  | 1.2072684  |                           |                |
| DM07679P2 | 0.5546353  | 1.1753274  | 1.0106095  | 1.1736711  |                           |                |
| DM12343P2 | 0.5547115  | 1.1985699  | 1.2688719  | 1.0677625  |                           |                |
| DM02857P3 | 0.5547516  | -1.1052809 | -1.1216438 | -1.0166502 | PGD                       | NM_001006303.1 |
| DM10867P2 | 0.55476856 | -1.150981  | -1.0393205 | -1.1406356 |                           |                |
| DM11637P1 | 0.5550637  | 1.1429229  | 1.249193   | -1.3764791 |                           |                |
| DM11743P1 | 0.555157   | -1.0329959 | -1.0388519 | -1.1254414 |                           |                |
| DM10026P2 | 0.5552086  | 1.1190568  | 1.1346313  | 1.0991544  |                           |                |
| DM02642P1 | 0.55527335 | -1.121667  | -1.1434749 | -1.0798591 | LOC1001681:XM_001950799.1 |                |
| DM11987P4 | 0.55534583 | -1.061352  | -1.0584855 | -1.1462817 |                           |                |
| DM11733P1 | 0.5554591  | -1.276428  | -1.9430529 | -1.2190607 |                           |                |
| DM03941P2 | 0.5557082  | 1.3965898  | 1.3157244  | 1.3643824  |                           |                |
| DM06513P3 | 0.55590534 | 1.1184167  | -1.0010328 | 1.0194995  |                           |                |
| DM01846P3 | 0.5561385  | -1.0137886 | 1.0143685  | -1.0281012 | SNOG_05978                | XM_001796314.1 |
| DM03899P1 | 0.5561412  | 1.2162126  | -1.096826  | -1.0168388 |                           |                |
| DM04924P1 | 0.55645764 | -1.3320856 | -1.4997637 | -1.0694438 |                           |                |
| DM12499P1 | 0.5565132  | -1.0716726 | -1.1242791 | 1.1511856  |                           |                |
| DM03768P2 | 0.5565753  | -1.0769366 | -1.0868764 | -1.1045377 |                           |                |
| DM11745P1 | 0.5566517  | -1.0677316 | -1.0322131 | -1.130079  |                           |                |
| DM12905P1 | 0.5567281  | -1.0869823 | 1.8037083  | 1.2200168  |                           |                |
| DM09089P3 | 0.55687165 | -1.0721923 | 1.2173282  | -1.0209047 |                           |                |
| DM02713P1 | 0.55692494 | 1.1650398  | 1.4052389  | 1.0407115  | TRA2                      | NM_001126238.1 |
| DM11032P4 | 0.55693585 | -1.0215914 | 1.0282598  | -1.2142605 |                           |                |
| DM03584P3 | 0.55698484 | -1.148035  | -1.1401169 | -1.0390519 |                           |                |
| DM07151P2 | 0.55699915 | 1.1101516  | 1.1310097  | 1.0267655  |                           |                |
| DM14379P3 | 0.5572788  | -1.4657714 | -1.1111585 | -1.3563032 |                           |                |
| DM08018P1 | 0.5578727  | -1.0998974 | 1.0753034  | -1.0950935 |                           |                |

|           |            |            |            |            |             |                |
|-----------|------------|------------|------------|------------|-------------|----------------|
| DM12050P1 | 0.55790204 | 1.0221609  | -1.1791576 | -1.0166525 |             |                |
| DM03729P3 | 0.5579052  | -1.042277  | -1.0959766 | -1.0330498 | ISCW_ISCWC  | XM_002411103.1 |
| DM14846P3 | 0.558162   | 1.0744408  | 1.0369629  | 1.0072998  |             |                |
| DM09798P2 | 0.55818427 | 1.006609   | 1.1663381  | 1.0454712  |             |                |
| DM02277P3 | 0.55824876 | 1.1041828  | 1.0421652  | 1.0677555  | CPNE3       | NM_027769.2    |
| DM01421P2 | 0.55837226 | 1.4288236  | 1.5423855  | 1.5245842  | LOC583677   | XM_001193581.1 |
| DM06274P3 | 0.55864984 | -1.043999  | 1.1544778  | 1.2063187  | DWIL\GK204  | XM_002068395.1 |
| DM09025P3 | 0.5587026  | -1.0658909 | 1.0654281  | -1.0026907 |             |                |
| DM07754P3 | 0.55890274 | -1.0215076 | 1.002123   | -1.1541402 |             |                |
| DM01489P3 | 0.5591061  | 1.5086348  | 1.4646603  | 1.1731542  |             |                |
| DM06743P2 | 0.5591666  | -1.1645002 | -1.1443923 | -1.1631904 |             |                |
| DM03861P2 | 0.5592318  | -1.0199953 | 1.1143922  | 1.0602063  |             |                |
| DM07730P3 | 0.55924094 | 1.1358198  | 1.1084598  | -1.1926508 |             |                |
| DM10476P3 | 0.5593005  | 1.3019395  | -1.0359229 | -1.1539325 |             |                |
| DM13992P3 | 0.55949146 | 1.5408535  | 1.620782   | 1.2459629  |             |                |
| DM02486P2 | 0.5595626  | -1.2853451 | -1.0791165 | -1.2879728 | LOC552416   | XM_624790.1    |
| DM15051P3 | 0.55959946 | 1.0373555  | 1.0180745  | -1.1539901 |             |                |
| DM00969P4 | 0.5596497  | -1.1070309 | -1.0639765 | -1.019109  | VHAAC39     | NM_130724.2    |
| DM08912P3 | 0.55973226 | 1.0885665  | -1.06905   | 1.0699488  |             |                |
| DM07618P2 | 0.55981934 | 1.0872828  | -1.0514201 | -1.0792416 |             |                |
| DM07632P2 | 0.55988216 | -1.0002837 | 1.1237698  | 1.0111554  |             |                |
| DM05695P3 | 0.559891   | 1.3064321  | 1.1362907  | 1.1936314  | DERE\GG229  | XM_001976541.1 |
| DM09055P1 | 0.5600118  | 1.1449378  | 1.1815157  | 1.1528875  |             |                |
| DM14258P1 | 0.5600739  | -1.1031852 | -1.1008811 | -1.1050775 |             |                |
| DM07862P1 | 0.5600846  | 1.106335   | 1.0151885  | -1.0226665 |             |                |
| DM10146P1 | 0.56023973 | -1.1617697 | 1.136621   | 1.3259487  |             |                |
| DM07888P1 | 0.5602766  | -1.2879777 | -1.0158714 | 1.1006303  |             |                |
| DM04900P1 | 0.5602994  | -1.147183  | -1.0033299 | 1.0977733  |             |                |
| DM12072P3 | 0.56043047 | -1.3871492 | -1.1788585 | -1.2473764 |             |                |
| DM08665P4 | 0.5605818  | 1.067574   | 1.1484169  | 1.1440148  |             |                |
| DM15309P3 | 0.5606305  | -1.3718398 | 1.113637   | -1.4264162 |             |                |
| DM05622P1 | 0.56068784 | -1.09076   | -1.3246636 | 1.082552   |             |                |
| DM13735P1 | 0.5607266  | 1.0209742  | 1.0635872  | 1.0631943  |             |                |
| DM00730P1 | 0.5609526  | 1.0296226  | -1.1129069 | -1.1822462 | LOC1001139  | XM_001599149.1 |
| DM09906P2 | 0.5610678  | 1.1346251  | 1.0334862  | -1.0792551 |             |                |
| DM02902P2 | 0.56111836 | -1.2628281 | -1.1047807 | -1.2183775 |             |                |
| DM06145P3 | 0.5615199  | 1.1169634  | 1.0928823  | 1.0366986  | DVIR\GJ2071 | XM_002049459.1 |
| DM04244P1 | 0.56168604 | 1.1316903  | 1.1891646  | 1.0533785  |             |                |
| DM01721P2 | 0.5616872  | -1.0423594 | -1.0551491 | 1.110343   | PABP        | NM_001098353.1 |
| DM03101P2 | 0.5617018  | 1.3278145  | 1.3357573  | 1.1311281  |             |                |
| DM12871P1 | 0.56171244 | -1.0668583 | 1.0902697  | 1.3400388  |             |                |
| DM01777P3 | 0.56172407 | -1.0478202 | -1.0332912 | -1.1983299 | TRIADDRAFT  | XM_002107945.1 |
| DM09398P1 | 0.56182116 | -1.0582504 | -1.085573  | -1.086655  |             |                |
| DM11334P2 | 0.56186694 | 1.1736106  | 1.3297411  | 1.2995664  |             |                |
| DM00301P1 | 0.5619287  | 1.203408   | -1.1369706 | 1.3448871  | LOC1000651  | XM_001495795.1 |
| DM14914P4 | 0.56193554 | 1.1196187  | 1.3269448  | 1.147261   |             |                |
| DM04572P2 | 0.56200916 | -1.1688466 | -1.0502223 | 1.0258404  |             |                |
| DM09374P1 | 0.5621181  | 1.2498438  | 1.440295   | -1.041418  |             |                |
| DM08330P2 | 0.5621377  | 1.0700856  | -1.0607289 | -1.0671352 |             |                |
| DM01996P4 | 0.5621655  | -1.3105685 | -1.2053198 | -1.2390449 | LOC692797   | NM_001046644.1 |

|           |            |            |            |            |              |                |
|-----------|------------|------------|------------|------------|--------------|----------------|
| DM05441P2 | 0.56219995 | -1.0228887 | -1.1421082 | -1.154667  |              |                |
| DM04960P2 | 0.5622241  | 1.1853083  | 1.1492869  | 1.3078157  |              |                |
| DM13124P3 | 0.56224805 | -1.1875464 | -1.125147  | -1.1870086 |              |                |
| DM05582P4 | 0.56227994 | 1.3062946  | 1.0473917  | 1.0183877  |              |                |
| DM04040P4 | 0.56240445 | 1.0102654  | -1.0321144 | -1.0631033 |              |                |
| DM10002P4 | 0.5624127  | -1.0019594 | 1.1044627  | 1.068354   |              |                |
| DM07817P1 | 0.56246054 | -1.0561669 | 1.0128413  | -1.0036079 |              |                |
| DM03801P1 | 0.5627362  | -1.2923295 | -1.101185  | -1.09995   | HKE-4.2      | NM_078162.3    |
| DM01538P3 | 0.56289935 | -1.0689402 | -1.0294788 | 1.0412265  | CPIPJ_CPIJ01 | XM_001862572.1 |
| DM04995P4 | 0.5631443  | -1.1263843 | -1.398634  | -1.1245809 |              |                |
| DM08655P1 | 0.56329495 | 1.1769978  | -1.1258059 | 1.0641371  |              |                |
| DM05486P1 | 0.56342775 | 1.0159514  | -1.0695797 | -1.0260286 |              |                |
| DM06582P2 | 0.56348366 | -1.1326967 | -1.0364934 | -1.190865  |              |                |
| DM10166P1 | 0.56372106 | -1.0014611 | 1.0635395  | 1.0062798  |              |                |
| DM03371P2 | 0.5637544  | 1.2682031  | 1.3284131  | -1.1729717 |              |                |
| DM07816P3 | 0.56377953 | 1.1102962  | 1.2473856  | 1.0487227  |              |                |
| DM03090P3 | 0.5638094  | -1.0263624 | -1.102163  | 1.0667325  |              |                |
| DM08814P2 | 0.5641346  | 1.373092   | -1.0145478 | -1.0904704 |              |                |
| DM09052P3 | 0.5641855  | -1.0311068 | 1.0291322  | 1.0786786  |              |                |
| DM10917P4 | 0.564188   | 1.028381   | 1.1611348  | 1.014054   |              |                |
| DM09726P3 | 0.564244   | -1.011321  | 1.112824   | -1.1175178 |              |                |
| DM01493P3 | 0.56436735 | 1.0046823  | -1.023284  | 1.0846591  | SDCCAG1      | NM_025441.2    |
| DM10426P4 | 0.5644231  | -1.0788759 | 1.0524246  | 1.013829   |              |                |
| DM13307P2 | 0.56460285 | 1.2581706  | -1.1653854 | -1.3363439 | MGL_4172     | XM_001728641.1 |
| DM09314P1 | 0.56474316 | -1.0346435 | 1.0600363  | -1.1320914 |              |                |
| DM13088P1 | 0.56490904 | 1.3878715  | 1.092745   | 1.4681846  |              |                |
| DM05524P3 | 0.5649916  | 1.0610987  | 1.0452477  | -1.072485  | LOC727202    | XM_001122912.1 |
| DM14994P1 | 0.5651568  | 1.0870724  | 1.0337453  | 1.1970197  |              |                |
| DM09178P2 | 0.5652131  | -1.1101558 | -1.0338378 | 1.2046963  |              |                |
| DM13561P2 | 0.56523156 | -1.2203406 | -1.0372428 | -1.2088996 |              |                |
| DM08928P2 | 0.5653192  | -1.1003433 | 1.0026042  | -1.0425419 |              |                |
| DM14002P3 | 0.5658465  | -1.0068189 | -1.0708377 | 1.10397    |              |                |
| DM15103P1 | 0.5658744  | 1.0547732  | 1.0513955  | 1.2012627  |              |                |
| DM06851P2 | 0.5660062  | -1.5541486 | -1.4138206 | -1.5441024 |              |                |
| DM14417P2 | 0.56602997 | 1.060031   | 1.0175358  | 1.1385819  |              |                |
| DM08951P1 | 0.56618375 | 1.0553758  | -1.10072   | 1.1914177  | PB300950.00  | XM_666320.1    |
| DM09304P3 | 0.56630594 | -1.0617403 | 1.2291758  | -1.053962  |              |                |
| DM07906P1 | 0.5663062  | -1.1082182 | -1.0636493 | -1.0787774 | CPR146       | NM_001171643.1 |
| DM04991P2 | 0.56632835 | -1.198507  | -1.0630429 | -1.2087674 |              |                |
| DM08120P1 | 0.56633776 | 1.0668993  | 1.2949423  | 1.3538146  |              |                |
| DM10084P1 | 0.56655264 | 1.3185996  | 1.0043288  | 1.2099471  |              |                |
| DM08322P1 | 0.5666174  | 1.0857337  | -1.1926891 | 1.6043324  |              |                |
| DM09404P3 | 0.5666255  | -1.0961057 | 1.0641485  | -1.0054739 |              |                |
| DM10252P1 | 0.5667102  | 1.0415272  | 1.1402308  | 1.0199603  |              |                |
| DM09779P3 | 0.56676465 | -1.1498337 | 1.0774646  | -1.031588  |              |                |
| DM12687P2 | 0.56689924 | 1.1279466  | 1.035407   | -1.0389011 |              |                |
| DM12935P2 | 0.56707007 | 1.0935762  | -1.0685093 | 1.164592   |              |                |
| DM03264P3 | 0.5671722  | 1.0972047  | 1.1770381  | 1.1769     |              |                |
| DM13888P2 | 0.56738436 | -1.0444736 | 1.0596629  | -1.0375016 |              |                |
| DM01787P4 | 0.5674636  | -1.0350709 | -1.0044655 | -1.0174352 | RPL7A        | NM_001078691.1 |

|           |            |            |            |            |            |                |
|-----------|------------|------------|------------|------------|------------|----------------|
| DM13792P2 | 0.56755936 | -1.124482  | -1.0426149 | 1.0473613  |            |                |
| DM02418P1 | 0.5677404  | -1.1065555 | 1.0063778  | -1.0278927 | LOC657643  | XM_964090.2    |
| DM11213P3 | 0.56781876 | 1.2881435  | 1.0742091  | 1.0416927  |            |                |
| DM12345P1 | 0.5679024  | 1.1359516  | 1.2877682  | 1.3034178  |            |                |
| DM08787P1 | 0.56805027 | 1.1555609  | 1.0730286  | -1.0039613 |            |                |
| DM11607P3 | 0.56812084 | -1.4146383 | 1.1105695  | -1.2072357 |            |                |
| DM07566P1 | 0.5681341  | -1.0293317 | -1.0076454 | 1.0755684  |            |                |
| DM06811P3 | 0.5683666  | -1.2045832 | -1.122126  | 1.0474949  |            |                |
| DM06226P4 | 0.5683785  | -1.0555043 | -1.0442631 | -1.0994164 |            |                |
| DM14339P1 | 0.5683925  | 1.0430516  | 1.3221508  | 1.1909784  |            |                |
| DM08559P2 | 0.56843174 | 1.001877   | -1.2383131 | -1.0679444 |            |                |
| DM12788P2 | 0.56844753 | 1.1948159  | 1.1002735  | 1.1667651  |            |                |
| DM09715P1 | 0.56859934 | -1.0331492 | 1.1010754  | -1.0093725 |            |                |
| DM14651P1 | 0.5686388  | -1.0449215 | 1.0631313  | 1.0989269  |            |                |
| DM11296P1 | 0.5686491  | -1.0625799 | -1.148842  | 1.0348619  |            |                |
| DM14534P2 | 0.56873995 | 1.096928   | 1.1072103  | 1.229368   |            |                |
| DM01017P1 | 0.5688037  | 1.0009954  | -1.1647258 | -1.1543652 | TTHERM_001 | XM_001019714.3 |
| DM07258P2 | 0.5688457  | 1.0987347  | 1.066898   | 1.4102638  |            |                |
| DM07374P1 | 0.5688725  | 1.2516547  | -1.2608359 | 1.0456016  |            |                |
| DM09887P1 | 0.5689365  | 1.0705436  | 1.0862801  | 1.1946653  |            |                |
| DM06966P1 | 0.5689868  | 1.0545293  | -1.0803839 | 1.0166627  |            |                |
| DM11350P3 | 0.5690166  | 1.0834715  | 1.0904212  | 1.0368937  |            |                |
| DM08972P2 | 0.56907004 | -1.0143872 | -1.1760767 | 1.1949123  |            |                |
| DM12908P1 | 0.56913203 | -1.04788   | 1.0092072  | 1.1320232  |            |                |
| DM10925P2 | 0.5694831  | 1.2088133  | 1.0633655  | -1.0024456 |            |                |
| DM06117P3 | 0.5695251  | -1.0370731 | -1.0219247 | 1.0345263  | LOC657776  | XM_970882.2    |
| DM13144P2 | 0.56995285 | -1.1636981 | -1.1445355 | -1.0709294 |            |                |
| DM10812P1 | 0.5700431  | 1.1172141  | -1.2016189 | 1.2368484  |            |                |
| DM04757P1 | 0.57012415 | -1.2329115 | -1.144567  | -1.1162474 |            |                |
| DM07212P3 | 0.57012665 | 1.121742   | 1.1599001  | 1.0886973  |            |                |
| DM02593P2 | 0.5701395  | 1.4638935  | 1.2132933  | -1.0015535 | LOC576708  | XM_001175714.1 |
| DM10447P2 | 0.5701935  | 1.0081072  | 1.1026295  | -1.1302139 |            |                |
| DM08807P1 | 0.5702544  | -1.0067284 | -1.0603477 | -1.1272243 |            |                |
| DM03854P3 | 0.57033294 | -1.0121915 | 1.1058761  | 1.1039083  |            |                |
| DM12938P1 | 0.57059985 | -1.1325456 | -1.1773162 | 1.0197786  |            |                |
| DM07441P3 | 0.5707782  | -1.042949  | 1.1408124  | 1.1660173  |            |                |
| DM05346P1 | 0.570797   | -1.0304797 | -1.3841977 | -1.2690237 | SMARCA5    | XM_001234485.1 |
| DM07707P3 | 0.5708124  | -1.060721  | -1.0328674 | -1.0042038 |            |                |
| DM01539P1 | 0.5708193  | -1.0059464 | 1.1307559  | -1.0093677 | ITGB1BP2   | NM_001097705.1 |
| DM00397P1 | 0.57090044 | 1.1792996  | 1.0709567  | 1.082422   | LOC1001154 | XM_001600121.1 |
| DM13226P2 | 0.570905   | 1.0221618  | -1.1516533 | -1.1683439 |            |                |
| DM11676P1 | 0.5710981  | -1.0349052 | -1.113497  | -1.1391958 | LOC1001235 | XM_001607142.1 |
| DM06029P1 | 0.57110685 | 1.0035381  | 1.021827   | -1.1629604 |            |                |
| DM01988P4 | 0.57121485 | 1.0131799  | 1.0882025  | 1.0468212  | NIT2       | NM_001034126.1 |
| DM06796P1 | 0.5712788  | -1.0581326 | -1.174005  | 1.0144179  |            |                |
| DM08765P1 | 0.5712827  | -1.1340317 | 1.0081829  | -1.1863228 |            |                |
| DM09807P4 | 0.5713869  | -1.0569521 | 1.0441321  | 1.1877284  |            |                |
| DM03032P3 | 0.57139283 | 1.1944923  | 1.2907397  | 1.2093707  | LOC594703  | XM_001191012.1 |
| DM14901P3 | 0.5714418  | 1.1687285  | -1.2580572 | 1.0037472  |            |                |
| DM01220P4 | 0.5715395  | 1.0479851  | 1.0865513  | 1.0653089  | AGAP_AGAP0 | XM_554016.3    |

|           |            |            |            |            |                            |
|-----------|------------|------------|------------|------------|----------------------------|
| DM07123P1 | 0.5715409  | -1.2039475 | -1.0424376 | -1.1935391 |                            |
| DM13468P3 | 0.57158417 | -1.1921833 | 1.024847   | -1.1387019 |                            |
| DM06769P3 | 0.57167083 | -1.2408017 | -1.2603287 | -1.1204907 |                            |
| DM07922P1 | 0.5716957  | -1.1490086 | 1.1980768  | 1.033385   |                            |
| DM04736P3 | 0.5718089  | -1.1120509 | -1.2459764 | 1.5002047  |                            |
| DM04382P1 | 0.57185507 | 1.0152541  | 1.0195599  | -1.0938971 |                            |
| DM09071P2 | 0.57188153 | -1.0373619 | 1.1885191  | 1.0468054  |                            |
| DM13249P1 | 0.5719038  | -1.1432596 | 1.0952152  | 1.1129099  |                            |
| DM13108P1 | 0.57201797 | -1.0515444 | -1.0262175 | -1.1317319 |                            |
| DM02226P4 | 0.57219625 | 1.0557878  | -1.0397722 | -1.0257468 | LOC1001606(XM_001951428.1  |
| DM06575P4 | 0.5722294  | 1.0152596  | 1.1602647  | 1.3480042  | YALIOC03894 XM_501418.1    |
| DM07550P1 | 0.5722326  | 1.1843711  | 1.1275022  | 1.1251893  |                            |
| DM03922P3 | 0.5726504  | -1.0015134 | 1.0944185  | -1.029312  |                            |
| DM06072P3 | 0.57272124 | 1.0370827  | 1.0827538  | 1.2290646  |                            |
| DM06290P1 | 0.5727466  | 1.1075829  | 1.45233    | 1.505047   | DWIL\GK116(XM_002069559.1  |
| DM07551P1 | 0.57275695 | 1.0084393  | 1.0075274  | -1.1798408 |                            |
| DM04151P3 | 0.5729356  | -1.1387761 | -1.1174614 | -1.1902368 |                            |
| DM05891P3 | 0.57305557 | 1.0270933  | -1.0539881 | -1.0763271 | LOC1000880(XM_001517807.1  |
| DM01829P3 | 0.57310784 | -1.1735337 | 1.0134383  | 1.0425508  | ISCW_ISCWC XM_002407972.1  |
| DM04560P3 | 0.5731412  | -1.059437  | 1.0501642  | 1.035163   | DPSE\GA184(XM_001358084.2  |
| DM09775P1 | 0.57314974 | -1.1776248 | 1.0248291  | -1.0598768 |                            |
| DM05122P3 | 0.5731921  | -1.0650734 | -1.0617307 | -1.0968524 | MED XM_001654315.1         |
| DM07812P2 | 0.57328403 | -1.0642669 | -1.0067711 | 1.024253   |                            |
| DM02422P3 | 0.5733994  | -1.0519954 | 1.0282791  | 1.1666005  | LOC1001808(XM_002122993.1  |
| DM08589P4 | 0.57355374 | 1.020833   | 1.0513351  | 1.176961   |                            |
| DM11910P3 | 0.5738925  | -1.0011699 | -1.0327967 | -1.0830508 |                            |
| DM01976P4 | 0.57391804 | 1.2033132  | -1.0696663 | 1.0049471  | CSNK1E NM_204377.2         |
| DM13651P1 | 0.57393    | -1.0091678 | 1.0283444  | 1.1268381  |                            |
| DM10680P4 | 0.57393235 | -1.0585592 | -1.487146  | 1.0204245  |                            |
| DM09464P3 | 0.57411647 | 1.161981   | -1.0815154 | 1.0242432  |                            |
| DM01543P1 | 0.5742366  | -1.0194342 | 1.1782813  | 1.0636297  | LOC1000736(XM_001507786.1  |
| DM07117P4 | 0.5743666  | 1.0876286  | 1.044079   | -1.0923535 |                            |
| DM04998P1 | 0.57440513 | 1.3044827  | 1.3221403  | 1.2062997  |                            |
| DM11199P2 | 0.57448906 | -1.053772  | -1.2280557 | -1.0196731 |                            |
| DM10501P3 | 0.5745218  | 1.1859429  | -1.150241  | 1.0577614  |                            |
| DM05953P1 | 0.57455385 | 1.0090501  | -1.0424764 | -1.1056788 | LOC409384 XM_392899.3      |
| DM08231P1 | 0.5745783  | 1.1734011  | -1.0850962 | -1.076947  |                            |
| DM13030P1 | 0.57458776 | 1.0135485  | -1.132603  | 1.076346   |                            |
| DM12238P1 | 0.5749341  | -1.0035025 | 1.0737002  | 1.0397573  |                            |
| DM10451P1 | 0.5752313  | 1.1942047  | 1.0945342  | -1.1785139 |                            |
| DM04121P1 | 0.5752592  | -1.0208975 | 1.0172606  | -1.0148298 | DVIR\GJ1336 XM_002047260.1 |
| DM06875P4 | 0.57529545 | -1.0437135 | -1.2531917 | 1.0110583  |                            |
| DM14512P1 | 0.5754704  | -1.205319  | -1.2806988 | -1.0391254 |                            |
| DM11505P1 | 0.5754946  | 1.0047522  | -1.0535599 | 1.1042781  |                            |
| DM10766P2 | 0.57572794 | -1.0791706 | -1.0498358 | -1.1194327 |                            |
| DM10590P2 | 0.5757649  | -1.034828  | 1.0265629  | -1.0523221 |                            |
| DM10358P1 | 0.5758353  | -1.0315344 | -1.0567282 | 1.0033118  |                            |
| DM06423P2 | 0.575944   | -1.1041191 | -1.0250328 | -1.0673236 | ISCW_ISCWC XM_002416475.1  |
| DM03138P2 | 0.576014   | 1.1087484  | -1.2103295 | 1.228071   |                            |
| DM10379P1 | 0.5760978  | 1.2887954  | 1.0395739  | 1.1676236  |                            |

|           |            |            |            |            |                             |
|-----------|------------|------------|------------|------------|-----------------------------|
| DM08487P3 | 0.5761341  | 1.0525534  | -1.1324863 | -1.1632457 |                             |
| DM13580P3 | 0.57613593 | -1.0169975 | -1.0907114 | -1.1651102 | E1012E08.TM XM_001238744.1  |
| DM05360P2 | 0.5761807  | -1.0655844 | -1.0947769 | -1.178481  |                             |
| DM05006P3 | 0.5762664  | 1.0477589  | 1.0144223  | -1.0838972 |                             |
| DM11009P2 | 0.5762784  | 1.2040805  | 1.1487231  | -1.0431314 | LOC412885 XM_396337.2       |
| DM05416P2 | 0.5764586  | -1.2217628 | -1.1274995 | -1.1767056 |                             |
| DM00253P3 | 0.57647955 | -1.1150383 | 1.0240986  | -1.0831175 | RAD6 NM_001162282.1         |
| DM02784P1 | 0.5765064  | 1.3685075  | 1.7646482  | 1.2977767  | MGG_13625 XM_001408130.1    |
| DM12149P2 | 0.5765403  | -1.3130116 | -1.2499729 | -1.1169668 |                             |
| DM00138P3 | 0.57654566 | -1.0012017 | -1.0859842 | -1.0570487 | TUB8 XM_002330576.1         |
| DM01002P3 | 0.57658976 | -1.1402937 | -1.1184388 | -1.0212555 | LOC1001630! XM_001943554.1  |
| DM02255P1 | 0.57660383 | -1.0848689 | -1.061127  | -1.280049  |                             |
| DM04250P2 | 0.5767302  | 1.0514587  | 1.268578   | -1.2481768 |                             |
| DM13749P1 | 0.57677114 | 1.1174065  | -1.034334  | 1.1956257  |                             |
| DM02986P3 | 0.5768273  | 1.4104621  | 1.3682308  | 1.4019542  | CPIPJ_CPIJOC XM_001847804.1 |
| DM10255P1 | 0.57704216 | 1.1038642  | 1.1050335  | -1.1011741 |                             |
| DM13631P1 | 0.57722247 | -1.0646284 | 1.023953   | 1.0475589  |                             |
| DM05873P3 | 0.57730013 | -1.137891  | -1.0483783 | -1.0369979 | DPSE\GA215! XM_001352414.2  |
| DM10843P1 | 0.57735723 | 1.535148   | 1.5622267  | -1.078608  |                             |
| DM10334P2 | 0.57761616 | -1.0803337 | -1.0985466 | 1.1551073  |                             |
| DM02361P2 | 0.5777098  | -1.0305531 | 1.0167452  | -1.1194056 | AGAP_AGAP0 XM_319349.4      |
| DM14492P1 | 0.5778356  | 1.0608808  | 1.0853803  | 1.0774692  |                             |
| DM07876P2 | 0.57794917 | 1.0064381  | -1.0639117 | -1.0079741 |                             |
| DM12640P3 | 0.5781585  | 1.0700735  | 1.1334242  | 1.0391238  |                             |
| DM14474P2 | 0.5783066  | -1.0058132 | 1.0087689  | 1.1614976  |                             |
| DM07773P3 | 0.5783744  | -1.0159402 | 1.2077435  | 1.2286634  |                             |
| DM05887P2 | 0.57843596 | 1.108293   | -1.0474862 | 1.0251454  |                             |
| DM02905P1 | 0.57846093 | 1.0003967  | -1.099502  | -1.0738508 |                             |
| DM08905P3 | 0.57864535 | 1.0753208  | 1.3108014  | 1.0219374  |                             |
| DM04696P4 | 0.57866436 | -1.082421  | -1.110728  | -1.1255637 |                             |
| DM04335P4 | 0.578934   | -1.0955379 | 1.0566384  | -1.0949256 |                             |
| DM06441P2 | 0.57896435 | -1.0908691 | -1.0143657 | 1.0260656  | C4ORF34 XM_420745.2         |
| DM01956P2 | 0.579065   | -1.05824   | -1.1108404 | 1.080944   | ZGC:153668 NM_001076752.1   |
| DM10846P2 | 0.579109   | 1.2203573  | -1.1289784 | 1.1939534  |                             |
| DM05863P1 | 0.57916087 | 1.1309074  | 1.0505245  | -1.0008764 |                             |
| DM11259P2 | 0.57925284 | 1.0173988  | -1.0631207 | -1.0906469 |                             |
| DM07992P1 | 0.57964516 | 1.0185103  | 1.1013428  | 1.2427886  |                             |
| DM09192P3 | 0.57970124 | 1.1716624  | 1.1857003  | 1.3373798  |                             |
| DM01634P2 | 0.57982403 | -1.0468847 | -1.1307449 | -1.0572033 | AAEL_AAEL0C XM_001659470.1  |
| DM06519P1 | 0.5801343  | -1.162482  | -1.2173108 | -1.2726358 |                             |
| DM01349P3 | 0.5801785  | -1.0576929 | -1.3818406 | 1.1467352  | GNB1 NM_212609.1            |
| DM04106P3 | 0.58057654 | 1.0932877  | 1.0158005  | 1.1994244  |                             |
| DM03307P2 | 0.58065003 | -1.0228643 | -1.0841155 | -1.0707965 | ISCW_ISCWC XM_002412093.1   |
| DM06480P1 | 0.58104193 | -1.1235906 | -1.0486046 | -1.0375262 | DGRI\GH239' XM_001996455.1  |
| DM07708P2 | 0.58109015 | 1.0957133  | -1.0168111 | 1.0901673  |                             |
| DM10801P1 | 0.58112633 | -1.0147012 | 1.0377806  | 1.0792979  |                             |
| DM05020P1 | 0.5815687  | -1.0529163 | -1.0068182 | 1.0583248  |                             |
| DM08063P1 | 0.5817931  | -1.0159308 | -1.1808512 | -1.3420513 |                             |
| DM08712P1 | 0.58181983 | 1.1742882  | -1.4730738 | 1.0381459  |                             |
| DM04587P2 | 0.581967   | 1.0328019  | 1.1120374  | 1.0215108  |                             |

|           |            |            |            |            |             |                |
|-----------|------------|------------|------------|------------|-------------|----------------|
| DM04378P3 | 0.5820436  | -1.274844  | -1.3848225 | -1.00238   |             |                |
| DM08182P1 | 0.58205104 | -1.0603861 | -1.1229722 | 1.183104   |             |                |
| DM11092P3 | 0.5820529  | 1.1676989  | 1.0268817  | 1.0635304  |             |                |
| DM13281P3 | 0.58207077 | -1.0117223 | -1.147259  | 1.1190293  |             |                |
| DM13713P2 | 0.58225    | -1.3792778 | -1.04097   | -1.0759554 |             |                |
| DM13354P3 | 0.582318   | 1.2927477  | -1.0239848 | 1.0034266  |             |                |
| DM05957P1 | 0.5825834  | 1.094502   | -1.0493392 | 1.1689028  |             |                |
| DM10790P3 | 0.58261406 | -1.2421657 | -1.0685606 | -1.120807  |             |                |
| DM07306P1 | 0.58263916 | 1.0766188  | 1.147782   | 1.0403079  | DWIL\GK146\ | XM_002065414.1 |
| DM09689P4 | 0.5827497  | -1.1478598 | 1.1202234  | 1.0375656  |             |                |
| DM06016P1 | 0.5828375  | 1.01214    | -1.5290909 | 1.1788566  | KPNA1       | XM_393050.3    |
| DM10248P1 | 0.58284634 | -1.0713593 | -1.0367882 | 1.0525278  |             |                |
| DM14551P2 | 0.58302224 | 1.0383754  | 1.1819122  | 1.0656685  |             |                |
| DM13551P1 | 0.5832611  | -1.0959561 | -1.3000963 | -1.0524501 |             |                |
| DM08220P3 | 0.58327365 | -1.2135516 | -1.0282453 | -1.1478215 |             |                |
| DM09631P1 | 0.583311   | 1.0307895  | 1.1180149  | 1.1757475  |             |                |
| DM07112P1 | 0.58331543 | 1.1471751  | 1.0005975  | 1.0108111  |             |                |
| DM03938P1 | 0.583486   | 1.1125829  | 1.1228032  | -1.0274891 |             |                |
| DM10561P1 | 0.58355254 | -1.0858564 | -1.1020737 | -1.0083755 |             |                |
| DM09826P3 | 0.5836064  | -1.1032453 | -1.1718856 | -1.0994403 | ISCW_ISCWC  | XM_002412123.1 |
| DM05001P4 | 0.58361226 | -1.0041143 | 1.1478682  | 1.1324544  |             |                |
| DM01495P3 | 0.5836704  | 1.4291769  | 1.6925719  | 1.2218179  |             |                |
| DM06873P2 | 0.58377427 | 1.2069818  | 1.5350462  | -1.1526469 |             |                |
| DM14280P1 | 0.58382124 | 1.0301796  | -1.2435384 | -1.2058249 |             |                |
| DM15166P4 | 0.583861   | -1.0225394 | 1.0420874  | -1.1475112 |             |                |
| DM06483P3 | 0.5839131  | -1.144321  | 1.0097368  | 1.0567845  |             |                |
| DM11562P2 | 0.5840419  | -1.0056173 | -1.080263  | -1.0849253 |             |                |
| DM11983P2 | 0.58413935 | -1.0054009 | -1.0502425 | -1.1067516 |             |                |
| DM09827P1 | 0.584154   | -1.0518404 | 1.0674471  | 1.1333945  |             |                |
| DM13548P2 | 0.5841661  | -1.057071  | -1.0706785 | 1.0229387  |             |                |
| DM11275P1 | 0.5842333  | 1.2213999  | 1.654981   | -1.0454981 |             |                |
| DM03515P2 | 0.5843587  | 1.002824   | -1.2784189 | -1.0160378 |             |                |
| DM04949P1 | 0.5843619  | -1.0732564 | -1.1009403 | -1.017028  |             |                |
| DM13025P1 | 0.5844366  | -1.1968195 | 1.0280057  | -1.2887775 | LOC1000120\ | XM_001366149.1 |
| DM03179P4 | 0.5845215  | -1.0412815 | -1.1035568 | -1.1247268 | LOC1001418\ | XM_001812034.1 |
| DM11916P2 | 0.58517027 | -1.0931218 | -1.1244651 | -1.3324517 |             |                |
| DM12998P3 | 0.585181   | -1.2860352 | -1.3437223 | -1.1249365 |             |                |
| DM09049P1 | 0.58527035 | -1.2306821 | 1.1663418  | -1.145255  |             |                |
| DM10319P1 | 0.58543193 | -1.0465463 | -1.3862312 | -1.1514243 |             |                |
| DM01408P2 | 0.58559746 | 1.0979166  | 1.1184834  | 1.0089363  |             |                |
| DM09457P1 | 0.58564055 | -1.0027246 | 1.1790967  | 1.1259735  |             |                |
| DM11835P3 | 0.58567315 | 1.0096533  | 1.1550988  | -1.0054321 |             |                |
| DM06361P2 | 0.58576095 | -1.1319389 | 1.0020242  | 1.0820811  |             |                |
| DM05323P3 | 0.5858241  | 1.1770957  | -1.0168667 | 1.0642114  |             |                |
| DM01865P3 | 0.5859489  | -1.0048004 | -1.1078647 | -1.0748708 | DWIL\GK140\ | XM_002073312.1 |
| DM06570P1 | 0.5859533  | 1.0044053  | -1.015881  | 1.0722973  |             |                |
| DM09815P2 | 0.58610845 | 1.3795046  | 2.6305141  | 1.065577   |             |                |
| DM01818P1 | 0.5861136  | -1.0950971 | -1.0587327 | -1.1021018 | LOC1001170\ | XM_001608124.1 |
| DM12541P3 | 0.5861569  | -1.0882024 | -1.1014818 | -1.017248  |             |                |
| DM10574P1 | 0.58621514 | -1.0018612 | -1.0829738 | -1.0706931 |             |                |



|           |            |            |            |            |             |                |
|-----------|------------|------------|------------|------------|-------------|----------------|
| DM03645P3 | 0.5862911  | 1.0559716  | 1.1733606  | 1.1706978  | CSGALNACT2  | NM_001172170.1 |
| DM04962P3 | 0.58649385 | -1.0234103 | -1.1125417 | -1.1048877 |             |                |
| DM03737P2 | 0.5866635  | 1.0210563  | -1.0066588 | 1.1829034  | LOC1000739' | XM_001505546.1 |
| DM00311P3 | 0.58677256 | 1.0083395  | -1.0000561 | -1.289791  | TAOK3       | XM_857668.1    |
| DM05356P3 | 0.58684784 | -1.0140014 | -1.0676719 | 1.0020798  | LOC1000652: | XM_001496616.2 |
| DM08785P2 | 0.58686674 | -1.0099313 | -1.3049138 | -1.1021725 |             |                |
| DM06607P3 | 0.58694017 | -1.0400615 | 1.0439965  | -1.0946256 |             |                |
| DM13560P1 | 0.58705884 | 1.0197427  | -1.016318  | 1.1999091  |             |                |
| DM00568P1 | 0.5870938  | 1.0520959  | 1.0206066  | -1.2139972 | DPSE\GA154' | XM_001360199.2 |
| DM14187P3 | 0.5870957  | -1.045806  | -1.1293509 | -1.1471878 |             |                |
| DM06179P2 | 0.587174   | -1.134774  | -1.0770942 | -1.0395728 |             |                |
| DM03222P1 | 0.58726263 | -1.057826  | -1.1557399 | -1.0687121 |             |                |
| DM09020P3 | 0.58733445 | -1.0131755 | -1.0051057 | 1.2873411  |             |                |
| DM00777P3 | 0.5877006  | -1.1547481 | -1.1224355 | -1.1359708 |             |                |
| DM10603P1 | 0.58776057 | 1.1207392  | 1.0566475  | 1.1171167  |             |                |
| DM14457P2 | 0.58776313 | -1.1120263 | 1.1336755  | 1.222669   |             |                |
| DM03389P1 | 0.587783   | 1.0125245  | -1.0137945 | -1.0894074 | LOC1002324' | XM_002198553.1 |
| DM09276P1 | 0.58778596 | -1.1057448 | -1.0891832 | -1.0104915 |             |                |
| DM00496P3 | 0.58789283 | -1.1339788 | -1.1197712 | -1.1153158 | DANA\GF147  | XM_001961799.1 |
| DM00591P3 | 0.58789796 | 1.0212631  | 1.0222923  | 1.095919   | DENND4A     | NM_001080989.2 |
| DM07152P3 | 0.5879082  | 1.1585286  | -1.1290637 | -1.1507818 |             |                |
| DM07465P1 | 0.5884081  | -1.1072983 | 1.0458522  | -1.1948825 |             |                |
| DM14304P1 | 0.588423   | -1.3323206 | 1.1775763  | -1.0032307 |             |                |
| DM00322P2 | 0.58849585 | 1.0243484  | 1.1115327  | -1.1067848 | LOC657546   | XM_964001.2    |
| DM08988P4 | 0.5885264  | -1.1180965 | -1.127882  | -1.152296  |             |                |
| DM02536P2 | 0.58858526 | -1.0253884 | -1.0518895 | -1.08852   | LOC580462   | XM_001176979.1 |
| DM10509P2 | 0.5886156  | 1.0568497  | 1.0126023  | -1.1525898 |             |                |
| DM03538P3 | 0.5886658  | -1.144508  | -1.1374074 | -1.1821641 | DSIM\GD210  | XM_002104540.1 |
| DM06549P4 | 0.588688   | -1.1845164 | -1.2152319 | 1.0224181  |             |                |
| DM08144P3 | 0.58889157 | -1.2520812 | -1.1598996 | 1.0289463  | OVO         | XM_002057882.1 |
| DM03537P3 | 0.5889628  | -1.1375555 | 1.0872823  | 1.0742071  |             |                |
| DM13671P2 | 0.5890502  | -1.0456918 | 1.0474353  | -1.1228498 |             |                |
| DM11949P1 | 0.58908284 | 1.0390978  | -1.028898  | 1.0757034  |             |                |
| DM04031P4 | 0.5891387  | -1.0675085 | -1.1515065 | -1.1262741 | DGR1\GH108' | XM_001987894.1 |
| DM05238P4 | 0.58932316 | 1.1432252  | 1.0363299  | -1.1794686 |             |                |
| DM09440P4 | 0.58958274 | 1.3404013  | 1.2691438  | -1.0052356 |             |                |
| DM08104P3 | 0.58964324 | 1.006723   | 1.6715333  | 1.049768   | DMOJ\GI120' | XM_002008065.1 |
| DM04476P3 | 0.589711   | 1.0236608  | -1.3190321 | 1.0563323  | POPC1       | NM_001032977.1 |
| DM07585P3 | 0.5897477  | -1.0280634 | -1.1683416 | 1.0020559  |             |                |
| DM05285P2 | 0.5898206  | 1.2531092  | 1.1700486  | -1.2344573 |             |                |
| DM08482P1 | 0.5900169  | 1.126693   | -1.1714016 | -1.110401  |             |                |
| DM15134P1 | 0.59009475 | -1.218225  | -1.0432215 | 1.0761591  |             |                |
| DM04511P3 | 0.5903456  | -1.0540328 | -1.1255747 | 1.1089196  | LOC410600   | XM_394078.3    |
| DM04482P3 | 0.59051394 | -1.1241971 | -1.2652893 | -1.0008358 |             |                |
| DM04695P1 | 0.59067553 | 1.0550128  | 2.264028   | -1.6105484 |             |                |
| DM05065P2 | 0.590726   | 1.0055078  | 1.3541259  | 1.1717194  | CTLP-5A     | NM_001167615.1 |
| DM08850P3 | 0.5907934  | -1.038902  | -1.0881996 | -1.11924   |             |                |
| DM09821P1 | 0.5909351  | -1.0955352 | 1.1317953  | -1.1585804 |             |                |
| DM06220P3 | 0.59094286 | -1.0965716 | -1.0752308 | -1.105643  | LOC1001159' | XM_001606275.1 |
| DM08881P3 | 0.59094286 | -1.2163421 | -1.2211455 | 1.4304732  |             |                |

|           |            |            |            |            |                            |
|-----------|------------|------------|------------|------------|----------------------------|
| DM02171P2 | 0.59095293 | 1.0445346  | -1.156343  | 1.124122   | ISCW_ISCWC XM_002411345.1  |
| DM01821P2 | 0.59113395 | 1.0327123  | 1.0988247  | 1.193859   |                            |
| DM05558P1 | 0.5912049  | 1.2170573  | 1.220368   | 1.198401   |                            |
| DM03117P3 | 0.5913408  | 1.1162566  | 1.0836337  | 1.0529522  |                            |
| DM04535P1 | 0.59136796 | 1.3942659  | 1.5123901  | 1.1349303  |                            |
| DM07658P2 | 0.5916956  | 1.3049343  | -1.0372252 | 2.155021   |                            |
| DM12993P1 | 0.5917763  | -1.1008223 | -1.2208147 | -1.0176609 |                            |
| DM13229P3 | 0.59180796 | -1.0286367 | 1.3197511  | 1.1532022  |                            |
| DM06732P3 | 0.5918449  | -1.4157639 | -1.3602198 | -1.2440252 |                            |
| DM11410P3 | 0.5918454  | 1.0539469  | -1.000998  | 1.0478679  |                            |
| DM12970P3 | 0.5919339  | 1.0457525  | -1.0495797 | 1.0613817  |                            |
| DM00924P2 | 0.5921263  | 1.3003757  | 1.264357   | 1.0518075  | LOC1002297' XM_002195386.1 |
| DM03098P1 | 0.5922102  | 1.0378674  | 1.2629288  | 1.3483236  |                            |
| DM08260P1 | 0.5922771  | -1.0876799 | -1.0348694 | 1.0741681  |                            |
| DM06412P4 | 0.5923827  | 1.0001104  | 1.0941428  | 1.10111    |                            |
| DM00725P1 | 0.5925734  | 1.0413964  | 1.1657467  | 1.0094857  | DVIR\GJ2062 XM_002049644.1 |
| DM06744P4 | 0.59262794 | 1.102302   | 1.1286652  | 1.145661   |                            |
| DM15223P2 | 0.5927615  | 1.0620205  | -1.1551485 | 1.3574213  |                            |
| DM08701P1 | 0.5927624  | -1.7703723 | 1.0144147  | -1.0451069 |                            |
| DM01602P1 | 0.5933848  | -1.0140175 | 1.0018141  | 1.0095217  | LOC1001867' XM_002130120.1 |
| DM15339P1 | 0.5934992  | -1.0822189 | 1.1477634  | 1.0295913  |                            |
| DM14211P1 | 0.5937055  | -1.04919   | 1.0911708  | -1.2235693 |                            |
| DM00028P2 | 0.593845   | -1.2193828 | -1.1226311 | -1.1387478 | UFSP2 NR_028085.1          |
| DM09947P1 | 0.59387666 | -1.1533395 | -1.3639752 | 1.1870223  |                            |
| DM00738P2 | 0.5940767  | -1.001887  | -1.079258  | -1.1178503 | DWIL\GK245' XM_002066598.1 |
| DM06101P3 | 0.59429926 | 1.2090069  | 1.1818941  | 1.1779256  | DYAK\GE230' XM_002086241.1 |
| DM15395P1 | 0.59438396 | 1.1035459  | 1.2872651  | 1.1350137  |                            |
| DM06884P1 | 0.5944956  | 1.0180925  | -1.1449643 | -1.3616942 |                            |
| DM06781P3 | 0.59450245 | 1.1111358  | 1.0870755  | 1.0520772  |                            |
| DM06030P4 | 0.5946256  | 1.2894561  | -1.2281276 | -1.2458022 |                            |
| DM05421P1 | 0.594631   | -1.1005148 | -1.0387725 | -1.1148922 | AAEL_AAEL01 XM_001654974.1 |
| DM01906P1 | 0.59469414 | -1.0191046 | -1.0156469 | 1.004539   | LOC663175 XM_969233.2      |
| DM02643P2 | 0.5947814  | -1.1092234 | -1.0638478 | -1.1031438 | DMOJ\GI197' XM_002004143.1 |
| DM02979P2 | 0.594806   | 1.4236407  | 2.03224    | 1.415247   | DSEC\GM223 XM_002040750.1  |
| DM06351P3 | 0.59504473 | -1.0299275 | -1.152915  | -1.1530147 | DVIR\GJ2349 XM_002052076.1 |
| DM07763P2 | 0.5952041  | -1.1604253 | -1.0380821 | -1.014443  |                            |
| DM03800P2 | 0.5953344  | -1.0057542 | -1.0942545 | -1.0546747 |                            |
| DM00563P3 | 0.59539706 | 1.1471575  | 1.144924   | 1.0558767  | DPSE\GA187' XM_001357823.2 |
| DM14382P3 | 0.59541494 | 1.1307229  | -1.3336941 | 1.2847338  |                            |
| DM15100P2 | 0.5960102  | 1.1518593  | -1.099833  | 1.0332549  |                            |
| DM01122P2 | 0.59630555 | 1.1169333  | 1.1035559  | 1.0987569  |                            |
| DM03964P2 | 0.5964221  | -1.236246  | -1.0303817 | -1.0700868 | LOC1000310' XM_001380353.1 |
| DM09254P1 | 0.5964733  | 1.0124079  | -1.0795302 | -1.016725  | E1012E08.TM XM_001238745.1 |
| DM01955P4 | 0.59659106 | -1.1648437 | -1.0648729 | -1.046414  | DYAK\GE121' XM_002091494.1 |
| DM04564P2 | 0.59665614 | -1.1736183 | 1.0663048  | 1.0736489  |                            |
| DM08004P3 | 0.59675294 | 1.0143718  | 1.0006576  | -1.0975126 |                            |
| DM09206P2 | 0.5968672  | 1.010284   | -1.1120356 | 1.0164069  |                            |
| DM08189P1 | 0.5969852  | 1.1465678  | 1.1439813  | -1.0084015 |                            |
| DM02995P3 | 0.5970115  | -1.3012497 | -1.2864993 | -1.4632024 |                            |
| DM12695P1 | 0.59714013 | -1.0355245 | 1.0578752  | 1.0195848  |                            |

|           |            |            |            |            |              |                |
|-----------|------------|------------|------------|------------|--------------|----------------|
| DM00997P3 | 0.5974416  | 1.0249127  | 1.0799547  | -1.0826223 | ARIH1        | NM_001096354.1 |
| DM01922P1 | 0.5976598  | -1.1639102 | -1.1014988 | -1.0291046 | LOC657523    | XM_963979.2    |
| DM14035P2 | 0.5976916  | 1.0335783  | -1.0318608 | 1.1106758  |              |                |
| DM07982P1 | 0.59780496 | -1.071123  | -1.0377617 | -1.2281029 |              |                |
| DM12309P1 | 0.59793884 | 1.0083679  | -1.0547159 | 1.0151862  |              |                |
| DM14199P4 | 0.59830236 | 1.3136977  | 1.1929246  | 1.4597961  |              |                |
| DM02083P4 | 0.5983652  | -1.0871425 | -1.0468166 | -1.0763112 |              |                |
| DM15334P1 | 0.5984596  | 1.0564961  | 1.0455691  | -1.1682194 |              |                |
| DM08749P1 | 0.5986472  | 1.117519   | -1.0008842 | -1.2074746 |              |                |
| DM10389P3 | 0.598868   | 1.0825106  | 1.1499497  | 1.0032198  |              |                |
| DM07243P3 | 0.59907925 | 1.3157227  | 1.0923674  | -1.0378028 |              |                |
| DM03173P1 | 0.5991501  | 1.1378874  | 1.0378507  | 1.0921202  | CPIPJ_CPIJOC | XM_001845704.1 |
| DM08012P4 | 0.59939104 | -1.0801699 | 1.1477373  | -1.1899794 |              |                |
| DM10816P3 | 0.5994742  | -1.0218967 | -1.4712634 | -1.2035594 |              |                |
| DM13460P1 | 0.5994768  | -1.1307791 | -1.1611739 | -1.0165927 |              |                |
| DM05819P3 | 0.59949726 | 1.0256019  | 1.0455847  | -1.0856953 |              |                |
| DM04481P2 | 0.5996412  | 1.1444817  | -1.0152831 | 1.0693016  | CAO19.8939   | XM_709536.1    |
| DM12920P4 | 0.59967184 | 1.0803834  | 1.1134554  | 1.1177952  |              |                |
| DM12794P1 | 0.599678   | -1.1653876 | -1.1267781 | -1.0912455 |              |                |
| DM06415P1 | 0.59978235 | 1.0326945  | -1.084759  | -1.1368908 | BCKDHA       | NM_174506.1    |
| DM12220P1 | 0.6000592  | 1.1050953  | 1.174554   | -1.057531  |              |                |
| DM13607P2 | 0.60007524 | -1.1144996 | -1.1057065 | -1.1547122 |              |                |
| DM05009P1 | 0.6001054  | 1.230488   | 1.1202539  | 1.0944841  |              |                |
| DM03809P2 | 0.6001799  | -1.036887  | 1.0072416  | -1.1463255 | LOC1001676   | XM_001949445.1 |
| DM02989P4 | 0.60047334 | 1.4082595  | 1.5436052  | 1.2961969  |              |                |
| DM12074P3 | 0.60051084 | -1.0023509 | 1.1780941  | 1.1703749  |              |                |
| DM12340P1 | 0.6006221  | -1.2755373 | -1.4120309 | -1.2289374 |              |                |
| DM12044P2 | 0.60071105 | -1.0212779 | 1.0410163  | 1.1078781  |              |                |
| DM11268P4 | 0.60084003 | -1.132126  | 1.7042848  | -1.6877563 |              |                |
| DM14705P2 | 0.6008457  | -1.1545779 | 1.0321132  | 1.0609841  |              |                |
| DM06426P2 | 0.6010709  | 1.3904058  | 1.802306   | 1.0224005  | LOC1001657   | NM_001134286.1 |
| DM15016P1 | 0.60112065 | -1.0357485 | -1.2415221 | 1.0309029  |              |                |
| DM00817P4 | 0.6014863  | -1.3314769 | -1.2606806 | -1.3122897 | LOC1001642   | XM_001943122.1 |
| DM05954P2 | 0.60188395 | 1.0726731  | 1.1923127  | 1.1846739  | AAEL_AAEL01  | XM_001648682.1 |
| DM04945P1 | 0.60190445 | -1.0218861 | -1.0674704 | -1.1446116 |              |                |
| DM08279P1 | 0.6020411  | 1.159172   | 1.4333481  | 1.4847738  |              |                |
| DM06506P3 | 0.602133   | 1.1487768  | 1.0977123  | 1.0701472  |              |                |
| DM12166P1 | 0.6022864  | 1.1197639  | -1.2339    | 1.0829765  |              |                |
| DM05785P2 | 0.60235345 | -1.012664  | -1.0763637 | 1.2735763  |              |                |
| DM03588P3 | 0.60248286 | 1.1216574  | -1.136235  | 1.0126623  | ISCW_ISWC    | XM_002416559.1 |
| DM08597P2 | 0.6026     | 1.0419873  | 1.1075182  | 1.2591238  |              |                |
| DM12480P3 | 0.60264224 | 1.015136   | -1.0351517 | -1.1385424 |              |                |
| DM12825P1 | 0.6026897  | 1.0329123  | -1.0526899 | 1.1117779  |              |                |
| DM07735P3 | 0.60286355 | 1.0214838  | -1.0875196 | 1.0581981  |              |                |
| DM06962P3 | 0.60349244 | -1.0685922 | -1.0147315 | -1.1944861 | SOX5         | XM_860927.1    |
| DM08309P1 | 0.60357565 | 1.0502542  | 1.0696479  | 1.1456757  |              |                |
| DM02804P3 | 0.60359645 | -1.1981087 | -1.1759266 | -1.053987  | BM1_25220    | XM_001896468.1 |
| DM05506P4 | 0.6036078  | 1.0981361  | 2.1981246  | 1.2446958  |              |                |
| DM11511P1 | 0.6036692  | -1.1507931 | -1.0839437 | 1.201438   |              |                |
| DM03811P1 | 0.60379946 | 1.0302492  | -1.0312982 | -1.0482374 | DVIR\GJ1416  | XM_002051029.1 |

|           |            |            |            |            |                           |
|-----------|------------|------------|------------|------------|---------------------------|
| DM08498P2 | 0.6038656  | 1.0285361  | 1.0005412  | -1.078531  |                           |
| DM13549P3 | 0.60395736 | 1.0390651  | -1.1907313 | -1.0204734 |                           |
| DM06947P3 | 0.6039713  | 1.0239999  | 1.1615038  | 1.275961   |                           |
| DM04145P1 | 0.6041794  | -1.0385692 | 1.01603    | 1.1809821  |                           |
| DM06077P2 | 0.60419047 | 1.0304248  | -1.145883  | -1.2068472 | DANA\GF141\XM_001962977.1 |
| DM02370P1 | 0.6042229  | 1.0279211  | 1.4197142  | -1.003823  | LOC1001657\NM_001134286.1 |
| DM15261P3 | 0.6042645  | -1.0055625 | 1.1028141  | -1.0180634 |                           |
| DM11385P2 | 0.6043359  | -1.310879  | -1.2861198 | -1.3425112 |                           |
| DM14250P4 | 0.604361   | 1.0747385  | -1.1010339 | -1.4817464 |                           |
| DM09599P1 | 0.60440403 | -1.0271243 | 1.2050548  | 1.1506147  |                           |
| DM15338P2 | 0.60481983 | 1.15884    | 1.175237   | 1.142293   |                           |
| DM13812P1 | 0.6048314  | -1.0037448 | -1.1001817 | -1.0742308 |                           |
| DM06393P4 | 0.6048648  | -1.0450155 | -1.4510856 | -1.0690086 |                           |
| DM14876P2 | 0.6048958  | 1.0279657  | 1.1094729  | 1.2100878  |                           |
| DM13116P1 | 0.6050124  | -1.2296331 | -1.0819328 | -1.0222527 |                           |
| DM12862P2 | 0.6050905  | 1.0689023  | 1.0047213  | 1.1490601  |                           |
| DM13856P4 | 0.6053323  | -1.1479633 | -1.4455388 | -1.2217432 |                           |
| DM08111P3 | 0.60548025 | 1.040612   | -1.0449827 | 1.0511923  |                           |
| DM05514P2 | 0.6057522  | -1.03735   | -1.0853739 | 1.0805869  |                           |
| DM12774P2 | 0.6059975  | -1.1731453 | -1.4945896 | 1.0672946  |                           |
| DM04667P1 | 0.60614973 | -1.0322018 | -1.0569252 | -1.1600149 | DWIL\GK239 XM_002064525.1 |
| DM01845P3 | 0.6062876  | 1.1379277  | 1.1685432  | 1.2137594  | AMY XM_001653232.1        |
| DM13394P1 | 0.60634726 | -1.0093479 | -1.134478  | -1.1388596 |                           |
| DM09252P3 | 0.6063499  | -1.0367491 | -1.0404502 | -1.3530927 |                           |
| DM04194P4 | 0.60642445 | -1.033714  | -1.094001  | -1.0310509 | LELG_05692 XM_001523096.1 |
| DM10148P4 | 0.60645527 | -1.3416544 | -1.2391784 | -1.0898226 |                           |
| DM06762P3 | 0.6066924  | 1.0328156  | -1.149219  | -1.1187146 |                           |
| DM03104P4 | 0.60687363 | 1.0289649  | 1.040753   | -1.0711291 | DSEC\GM159 XM_002039963.1 |
| DM09926P1 | 0.606921   | 1.1472282  | 1.0940286  | 1.0378283  |                           |
| DM00457P4 | 0.606967   | 1.0838764  | 1.0657928  | -1.163412  | CAH1 XM_002079344.1       |
| DM06485P1 | 0.607008   | -1.132402  | 1.0827013  | 1.0062072  | RPA2 NM_011284.3          |
| DM02987P1 | 0.6072151  | 1.1890649  | 1.3504698  | 1.3399774  |                           |
| DM02261P1 | 0.60724    | 1.1096067  | -1.1126444 | 1.1037841  | AGAP_AGAP0 XM_308033.4    |
| DM06729P1 | 0.6073542  | 1.6558242  | 1.148635   | -2.0369983 |                           |
| DM03078P1 | 0.60750455 | -1.0983188 | -1.1616774 | -1.196542  | INX XM_001649705.1        |
| DM04462P2 | 0.6075531  | -1.1328642 | -1.1631613 | 1.0094906  |                           |
| DM05596P2 | 0.6075747  | 1.0510584  | -1.0312645 | 1.0089989  |                           |
| DM03694P1 | 0.6077459  | 1.0802824  | 1.0865655  | -1.1016104 |                           |
| DM04537P4 | 0.6077615  | -1.0480136 | -1.0169852 | -1.1791537 |                           |
| DM04865P1 | 0.6080228  | 1.0883265  | -1.1085534 | 1.0510858  |                           |
| DM03956P2 | 0.60805225 | -1.1064699 | -1.2298092 | -1.4110497 |                           |
| DM06807P1 | 0.60806197 | 1.2719272  | 1.0418776  | 1.4437572  |                           |
| DM10264P1 | 0.60806954 | 1.1956111  | -1.0385813 | 1.1573716  |                           |
| DM11630P3 | 0.6083186  | -1.0159304 | 1.0436381  | 1.0670711  |                           |
| DM04274P1 | 0.6084557  | -1.4365644 | -1.0549245 | -1.0684184 |                           |
| DM11453P1 | 0.6085698  | -1.0104814 | 1.1120694  | -1.0875982 |                           |
| DM15109P1 | 0.6088337  | -1.1436771 | -1.1533669 | -1.0362194 |                           |
| DM07780P1 | 0.60896564 | -1.0720166 | 1.1561413  | -1.0800291 |                           |
| DM13266P1 | 0.60923404 | -1.062364  | -1.2822663 | -1.0970594 |                           |
| DM05709P4 | 0.6095522  | -1.0959473 | -1.0059131 | -1.0489876 |                           |

|           |            |            |            |            |                           |                |
|-----------|------------|------------|------------|------------|---------------------------|----------------|
| DM12575P3 | 0.60973024 | -1.0258529 | 1.0364681  | -1.0325025 |                           |                |
| DM00855P2 | 0.6097507  | -1.163012  | -1.0677375 | -1.072006  | LOC633677                 | NM_029735.1    |
| DM05836P3 | 0.60976064 | 1.1312705  | 1.0475147  | -1.1474694 | LOC1002089!               | XM_002155639.1 |
| DM12268P3 | 0.60976136 | 1.0947124  | 1.1645087  | 1.0543845  |                           |                |
| DM12434P2 | 0.6098041  | 1.0809222  | -1.1127882 | -1.0459462 |                           |                |
| DM03418P2 | 0.6098559  | -1.0627693 | -1.172731  | -1.048266  |                           |                |
| DM06525P2 | 0.610002   | -1.0362588 | -1.182828  | -1.1709076 |                           |                |
| DM01235P1 | 0.6100086  | 1.1815783  | 1.2000577  | 1.3694603  |                           |                |
| DM10859P3 | 0.6100787  | 1.0820817  | 1.0442263  | -1.0489293 |                           |                |
| DM10903P4 | 0.61018103 | 1.1296364  | 1.1080415  | -1.1888907 |                           |                |
| DM11297P4 | 0.6101932  | -1.0777607 | -1.0744222 | 1.1501259  |                           |                |
| DM12157P2 | 0.6102036  | 1.1669194  | -1.0201641 | 1.0445411  |                           |                |
| DM14395P2 | 0.61026704 | 1.0648355  | -1.3583654 | -1.188486  |                           |                |
| DM11089P1 | 0.61040723 | 1.1250755  | 1.0141234  | -1.0167356 |                           |                |
| DM12299P1 | 0.6104286  | 1.0232145  | 1.2877272  | -1.1162992 |                           |                |
| DM05445P2 | 0.6104348  | 1.2239988  | -1.0542526 | -1.0114594 | SOX6                      | XM_001504947.2 |
| DM10957P3 | 0.610435   | 1.0232364  | 1.0687982  | -1.0729022 | LOC657535                 | XM_963991.2    |
| DM04773P2 | 0.61058706 | -1.4289843 | -1.8246628 | -1.2661057 |                           |                |
| DM09391P3 | 0.61062104 | -1.2178401 | -1.2359886 | -1.2413144 |                           |                |
| DM15157P2 | 0.6107667  | -1.3209878 | -1.3146238 | -1.3056521 |                           |                |
| DM05699P1 | 0.6108376  | -1.0190623 | 1.0505571  | -1.0781596 |                           |                |
| DM11452P1 | 0.61088914 | 1.1179959  | 1.0348631  | 1.0370549  |                           |                |
| DM06940P2 | 0.61097205 | 1.0522118  | 1.2420123  | -1.403187  |                           |                |
| DM07435P2 | 0.61101437 | 1.4262049  | -1.1633443 | 1.280732   |                           |                |
| DM01980P1 | 0.6110567  | -1.1114937 | -1.0653915 | -1.0586996 | LOC1001206(XM_001599881.1 |                |
| DM05240P4 | 0.61124355 | -1.0034653 | -1.0384122 | -1.0112665 | LOC1002070`XR_053703.1    |                |
| DM07583P2 | 0.61148846 | 1.4995421  | -1.0105678 | 1.1123371  |                           |                |
| DM06230P1 | 0.611521   | -1.0305891 | -1.0750597 | -1.0184085 |                           |                |
| DM06191P1 | 0.61162704 | 1.4278306  | 1.9348416  | 1.1113535  | DYAK\GE247!XM_002096945.1 |                |
| DM09936P1 | 0.6116777  | -1.1237088 | -1.117537  | -1.143243  |                           |                |
| DM08610P2 | 0.61177284 | -1.2730452 | -1.0835645 | -1.1579825 |                           |                |
| DM10577P2 | 0.6118487  | -1.0483085 | 1.0617373  | -1.0633202 |                           |                |
| DM09778P1 | 0.6119962  | 1.2948204  | -1.2168648 | -1.1818012 |                           |                |
| DM13706P1 | 0.61200595 | -1.0208763 | 1.0952096  | 1.0655621  |                           |                |
| DM03021P1 | 0.61203307 | 1.0874771  | -1.1999402 | 1.1934669  |                           |                |
| DM08087P1 | 0.61205804 | -1.0612783 | 1.0116383  | -1.1855327 |                           |                |
| DM12098P1 | 0.6121644  | -1.0650007 | -1.2753532 | -1.1626481 |                           |                |
| DM14242P3 | 0.61216795 | -1.036576  | -1.0114369 | 1.1515266  |                           |                |
| DM07365P2 | 0.612221   | 1.0071092  | -1.018836  | -1.3958457 |                           |                |
| DM10392P1 | 0.6123535  | 1.1254773  | 1.0011859  | 1.0722181  |                           |                |
| DM09091P2 | 0.6124727  | 1.1479315  | 1.1618289  | 1.0722928  |                           |                |
| DM15140P3 | 0.61284685 | -1.1359847 | 1.061958   | 1.0688344  |                           |                |
| DM11122P1 | 0.6129421  | 1.0643594  | 1.0294209  | 1.1996897  |                           |                |
| DM09185P1 | 0.6130111  | -1.0288984 | 1.1170677  | 1.4291768  |                           |                |
| DM09196P2 | 0.6130337  | -1.1301813 | -1.0260106 | -1.0256143 |                           |                |
| DM03563P2 | 0.61332035 | -1.0215592 | -1.1182419 | -1.1052173 |                           |                |
| DM09564P2 | 0.61333656 | -1.122633  | -1.2476176 | 1.0402101  |                           |                |
| DM13473P2 | 0.6133775  | 1.1103984  | -1.0019987 | 1.1236887  |                           |                |
| DM08927P3 | 0.6133985  | 1.1343465  | 1.1359881  | 1.0880544  |                           |                |
| DM06761P1 | 0.61362183 | 1.043101   | 1.1886742  | 1.0723201  | LOC752731                 | XM_001180016.1 |

|           |            |            |            |            |                            |
|-----------|------------|------------|------------|------------|----------------------------|
| DM07165P4 | 0.61365783 | 1.1999806  | -1.2644311 | 1.1318516  |                            |
| DM02458P1 | 0.61366093 | -1.0287715 | -1.0297767 | 1.0819831  | 3-Sep NM_019375.1          |
| DM05955P1 | 0.61373216 | -1.0370394 | 1.3110659  | 1.1865814  | DMOJ\GI120\ XM_002008065.1 |
| DM08461P3 | 0.6137359  | -1.2381504 | -1.3238914 | -1.116226  |                            |
| DM02563P4 | 0.6137657  | -1.0774021 | -1.0893067 | -1.2012886 |                            |
| DM12369P1 | 0.6139403  | 1.0546241  | 1.108686   | 1.1472597  |                            |
| DM04469P2 | 0.61416996 | -1.1157436 | 1.1053828  | 1.0974585  |                            |
| DM12857P3 | 0.6142241  | -1.3272321 | -1.0509014 | -1.2860295 |                            |
| DM05424P3 | 0.61432725 | -1.2158662 | 1.0713861  | -1.0046929 | LOC655763 XM_962325.1      |
| DM13986P1 | 0.6147243  | 1.2800963  | 1.3033135  | 1.36303    | LOC1000161\ XM_001365613.1 |
| DM08430P1 | 0.6147648  | -1.0050087 | 1.185732   | -1.1537093 |                            |
| DM07377P3 | 0.61477673 | 1.071547   | 1.1127998  | 1.0536548  |                            |
| DM06186P3 | 0.61496484 | 1.1126316  | -1.2360048 | 1.2377237  | AAEL_AAEL\ XM_001656771.1  |
| DM11642P1 | 0.61501086 | 1.2843686  | 1.1069301  | 1.1712939  |                            |
| DM04264P4 | 0.6152135  | -1.2063057 | -1.0765681 | 1.0066297  | BRAFLDRAFT\ XM_002606644.1 |
| DM00610P1 | 0.6154233  | 1.1076782  | 1.0731863  | 1.0747079  | NEDD4 XM_395191.3          |
| DM00918P2 | 0.61548966 | 1.329355   | -1.2157373 | 1.0570416  | DSIM\GD207 XM_002103959.1  |
| DM01210P4 | 0.6155824  | -1.1283207 | -1.1898636 | -1.0891452 |                            |
| DM06429P1 | 0.6156385  | -1.477496  | -1.2379199 | -1.3065698 | LOC1001622\ XM_001943034.1 |
| DM11944P2 | 0.6159278  | 1.1591601  | 1.0338713  | -1.0858506 |                            |
| DM03952P2 | 0.61625326 | -1.032102  | -1.0586125 | 1.0886201  | RBM17 NM_001046976.1       |
| DM03287P3 | 0.6163428  | 1.0773046  | 1.0183748  | 1.0453427  | LOC1002050\ XM_002163086.1 |
| DM14030P3 | 0.6165511  | -1.1797329 | 1.0039964  | 1.0950766  |                            |
| DM09964P3 | 0.6165831  | -1.1446576 | -1.1001397 | -1.1243658 | LOC1001667\ XM_001951541.1 |
| DM15258P2 | 0.6166891  | -1.1228079 | -1.1004525 | -1.0402932 |                            |
| DM07332P1 | 0.6169285  | 1.3116969  | 1.3397156  | 1.2888826  |                            |
| DM11286P2 | 0.6171542  | 1.2214105  | 1.2791725  | 1.2511399  |                            |
| DM01652P2 | 0.6172349  | 1.0625069  | -1.0337569 | 1.0324485  | NEMVEDRAFT XM_001633797.1  |
| DM12347P3 | 0.6173739  | 1.0455208  | -1.010359  | -1.0498596 |                            |
| DM00145P2 | 0.6174035  | 1.0992879  | 1.0356239  | -1.0381727 | LOC1000326\ XM_001381587.1 |
| DM11364P3 | 0.6180155  | -1.099815  | -1.0801036 | -1.0476958 | LOC587784 XM_795382.1      |
| DM03823P1 | 0.61802626 | 1.1827779  | 1.1379945  | -1.0533663 | NEMVEDRAFT XM_001633901.1  |
| DM13567P1 | 0.6180301  | 1.1720396  | -1.1395738 | -1.1362149 |                            |
| DM09361P1 | 0.61816746 | 1.332971   | 1.3954355  | 1.2531787  |                            |
| DM13174P4 | 0.61817515 | -1.1360855 | -1.0226758 | -1.1992127 |                            |
| DM03172P2 | 0.6182363  | 1.0568559  | 1.1081353  | 1.1543672  | LOC413435 XM_396879.3      |
| DM13195P3 | 0.61825687 | -1.1482897 | 1.0953768  | -1.020248  |                            |
| DM03744P2 | 0.618276   | 1.0890443  | 1.0433016  | 1.1022979  |                            |
| DM03006P1 | 0.6183687  | 1.0891048  | 1.1035672  | 1.1203526  |                            |
| DM13584P1 | 0.6185336  | 1.0344551  | 1.1089889  | 1.1487076  |                            |
| DM10321P2 | 0.61857545 | 1.0212272  | 1.2650394  | 1.2365803  |                            |
| DM04565P1 | 0.61858743 | -1.0717372 | -1.0643927 | 1.0122167  | DMOJ\GI242\ XM_001998866.1 |
| DM10391P1 | 0.61862254 | 1.2805132  | 1.0230376  | -1.0697771 |                            |
| DM14159P1 | 0.6186656  | 1.24399    | 1.0673474  | 1.1307882  |                            |
| DM14814P2 | 0.6189099  | -1.117609  | -1.0553038 | 1.0623811  |                            |
| DM13918P3 | 0.6190103  | 1.0075041  | -1.2091448 | -1.2413836 |                            |
| DM01619P2 | 0.6190979  | 1.018204   | 1.0105478  | 1.050374   | DMOJ\GI236\ XM_001998274.1 |
| DM02240P1 | 0.61914974 | 1.0586362  | -1.3004434 | 1.2091309  | LOC663675 XM_969711.2      |
| DM00286P1 | 0.61947024 | -1.0057878 | 1.0897502  | 1.0610716  | RAD6 NM_001162282.1        |
| DM09320P3 | 0.61960465 | -1.2095478 | 1.0979337  | -1.2756895 |                            |

|           |            |            |            |            |            |                |
|-----------|------------|------------|------------|------------|------------|----------------|
| DM03891P2 | 0.61964124 | 1.0635169  | 1.0301483  | 1.1229323  | NEMVEDRAFT | XM_001641171.1 |
| DM11106P4 | 0.61998844 | -1.276694  | -1.0316336 | -1.2792085 |            |                |
| DM08588P1 | 0.6200358  | 1.0186777  | 1.2918506  | 1.1826237  |            |                |
| DM14681P4 | 0.62010497 | -1.0732764 | -1.1233093 | 1.05131    |            |                |
| DM04012P2 | 0.6201373  | 1.0073051  | -1.0848507 | 1.1139691  |            |                |
| DM10511P1 | 0.6201435  | 1.0398741  | 1.049402   | -1.0080128 | LOC726700  | XM_001122423.1 |
| DM08675P1 | 0.6201698  | -1.0959938 | -1.1886152 | -1.3015867 |            |                |
| DM00732P2 | 0.6203797  | 1.0108308  | 1.2135266  | 1.4137874  |            |                |
| DM01501P3 | 0.62042373 | -1.014678  | 1.1531024  | -1.2692391 |            |                |
| DM10856P1 | 0.62045723 | 1.1953708  | -1.0263125 | 1.9517732  | LOC725319  | XM_001121179.1 |
| DM03567P2 | 0.62050897 | -1.1654419 | -1.1396037 | -1.0415158 | DMOJ\GI180 | XM_002003702.1 |
| DM10082P2 | 0.62055063 | -1.1777561 | -1.1357187 | 1.0116849  |            |                |
| DM04521P3 | 0.6205796  | 1.0182921  | 1.0461828  | -1.0379465 | PF10_0374  | XM_001347622.2 |
| DM11471P3 | 0.6206703  | 1.0490518  | 1.0097716  | -1.2456336 |            |                |
| DM06738P2 | 0.6208882  | -1.4310228 | -1.0102435 | -1.0810914 |            |                |
| DM13739P3 | 0.6209981  | -1.1541182 | 1.0061935  | -1.2583168 |            |                |
| DM04212P2 | 0.6212397  | -1.0244932 | -1.0803093 | 1.0934157  |            |                |
| DM07540P3 | 0.62165123 | 1.3723346  | 1.1049474  | 1.8675171  |            |                |
| DM05084P2 | 0.6216651  | -1.0894458 | -1.2211646 | -1.1206017 |            |                |
| DM13408P2 | 0.6216651  | -1.1147012 | -1.0056627 | 1.0082422  |            |                |
| DM08729P3 | 0.6217722  | 1.100017   | -1.09278   | 1.3599042  |            |                |
| DM01663P1 | 0.6218017  | 1.069213   | 1.0298494  | 1.0473814  | DYAK\GE134 | XM_002090949.1 |
| DM09213P2 | 0.6219632  | 1.2795013  | 1.1341418  | 1.0290112  |            |                |
| DM11458P4 | 0.62201303 | 1.0638032  | 1.0582099  | 1.1822234  |            |                |
| DM08055P2 | 0.6220205  | -1.0123796 | 1.0173566  | -1.0218863 |            |                |
| DM09036P1 | 0.62218535 | 1.0306304  | -1.0856898 | -1.0452552 |            |                |
| DM13674P1 | 0.62220883 | -1.0894294 | 1.5817327  | 1.1380424  |            |                |
| DM11997P4 | 0.6224298  | 1.0067353  | 1.0012704  | -1.2642604 |            |                |
| DM08177P1 | 0.6226283  | -1.0078729 | -1.1841305 | -1.0312338 |            |                |
| DM07410P2 | 0.6227417  | -1.5158548 | -1.3806106 | -1.3948115 |            |                |
| DM03508P3 | 0.6228165  | -1.0351962 | 1.088787   | 1.0811392  | CRYZ       | NM_001079763.1 |
| DM04132P1 | 0.62294143 | 1.1695322  | 1.004292   | 1.0432612  | LOC1000793 | XM_001514283.1 |
| DM14110P1 | 0.6230206  | 1.0328106  | -1.252775  | -1.0652049 |            |                |
| DM03701P2 | 0.62305343 | -1.0733312 | 1.1905543  | -1.0684719 | LOC732969  | NM_001046967.1 |
| DM05286P2 | 0.62308097 | -1.0719439 | 1.295439   | -1.0090741 |            |                |
| DM06591P2 | 0.62312007 | -1.0552021 | -1.125913  | -1.2118421 |            |                |
| DM02166P1 | 0.623134   | 1.013266   | -1.0341095 | -1.0020863 | MGC84239   | NM_001092766.1 |
| DM09092P4 | 0.62320477 | -1.0658016 | -1.0593698 | 1.0279552  |            |                |
| DM08648P1 | 0.6233458  | 1.0919981  | 1.044891   | 1.0633078  |            |                |
| DM04332P3 | 0.62336326 | 1.1193022  | 1.0246254  | 1.0588673  |            |                |
| DM14590P1 | 0.6233808  | 1.478724   | 1.5436375  | 1.5496627  |            |                |
| DM09840P2 | 0.6233892  | -1.0834435 | 1.0964144  | -1.0749437 |            |                |
| DM09983P3 | 0.6234765  | -1.3843677 | -1.2427592 | -1.3458728 |            |                |
| DM01737P2 | 0.6234873  | 1.3679713  | 1.600018   | 1.3708277  | BRAFLDRAFT | XM_002609300.1 |
| DM11219P1 | 0.6235144  | 1.0949912  | 1.2474037  | 1.0758988  |            |                |
| DM09846P3 | 0.6237997  | 1.0728725  | -1.0782049 | -1.1004623 |            |                |
| DM12642P3 | 0.6240295  | 1.0838385  | 1.0185161  | 1.0024902  |            |                |
| DM02511P3 | 0.624048   | 1.1103449  | 1.0276165  | -1.110524  |            |                |
| DM00916P1 | 0.62424386 | 1.2160501  | 1.1369672  | 1.0555779  |            |                |
| DM12218P2 | 0.6243175  | 1.4098601  | 1.4335781  | 1.2198763  |            |                |

|           |            |            |            |            |             |                |
|-----------|------------|------------|------------|------------|-------------|----------------|
| DM10168P1 | 0.6244803  | -1.0188898 | 1.0335275  | -1.0809078 |             |                |
| DM10006P4 | 0.6247763  | -1.8808283 | -1.5506024 | -1.7247963 |             |                |
| DM04159P1 | 0.6249739  | -1.076784  | -1.20903   | 1.0781615  |             |                |
| DM01540P1 | 0.6251283  | -1.2776468 | -1.0579464 | -1.0971309 | AGAP_AGAP0  | XM_315378.2    |
| DM14177P2 | 0.6251675  | 1.2006876  | 1.0358542  | -1.1100287 |             |                |
| DM03216P1 | 0.62550426 | -1.0173122 | -1.1868511 | 1.0854841  | AAEL_AAEL0C | XM_001655217.1 |
| DM11050P2 | 0.62558854 | 1.2540897  | 1.1772391  | -1.0639838 |             |                |
| DM09432P1 | 0.6257596  | 1.029561   | 1.1882131  | 1.0476389  |             |                |
| DM14566P4 | 0.62579566 | -1.3081862 | -1.1898758 | -1.1998366 |             |                |
| DM04055P1 | 0.6259134  | -1.0049797 | 1.0076631  | -1.0775317 |             |                |
| DM02187P1 | 0.62610084 | -1.1187507 | -1.0394772 | -1.2086136 | DWIL\GK244' | XM_002069141.1 |
| DM00459P3 | 0.62629527 | 1.2905301  | 1.0520009  | 1.0375025  | D10WSU52E   | NM_145422.4    |
| DM02000P3 | 0.62644213 | -1.0368048 | -1.0076326 | -1.0223126 |             |                |
| DM05564P1 | 0.62650007 | -1.0932956 | -1.1237005 | -1.2241644 |             |                |
| DM02564P1 | 0.62650055 | -1.0894076 | -1.063933  | -1.1354156 |             |                |
| DM12325P3 | 0.6265176  | 1.0459476  | 1.0372058  | -1.0070329 |             |                |
| DM08618P1 | 0.62657195 | -1.2469112 | -1.3289223 | -1.358076  |             |                |
| DM14731P2 | 0.62671477 | 1.2821798  | 1.0376515  | 1.0225787  |             |                |
| DM05126P3 | 0.6267657  | 1.1835952  | 1.1013577  | 1.4533587  |             |                |
| DM05045P1 | 0.6269393  | 1.1156116  | 1.3787441  | 1.2003073  | DMOJ\GI187' | XM_002005948.1 |
| DM01912P3 | 0.62707543 | -1.1456002 | -1.0554883 | -1.0454684 | TKT         | XM_001649091.1 |
| DM00649P2 | 0.62726974 | -1.1005809 | -1.0332888 | 1.0067201  | NEMVEDRAFT  | XM_001638077.1 |
| DM11211P3 | 0.6272753  | -1.0464046 | -1.2246348 | 1.010989   |             |                |
| DM13303P3 | 0.6273717  | -1.2444818 | -1.0151517 | -1.1567959 |             |                |
| DM10190P1 | 0.62780523 | 1.12447    | -1.137977  | -1.1127541 |             |                |
| DM03269P1 | 0.62803817 | 1.0909197  | 1.1050776  | 1.0302064  |             |                |
| DM04078P4 | 0.62818545 | -1.2560774 | -1.0827878 | -1.0978067 |             |                |
| DM12916P2 | 0.62820596 | 1.266921   | 1.031912   | -1.2611443 |             |                |
| DM13450P1 | 0.6284006  | -1.147148  | -1.098509  | -1.0108613 |             |                |
| DM02291P2 | 0.62842447 | -1.036426  | -1.1806693 | 1.1169565  | LOC1001657' | NM_001134286.1 |
| DM14770P4 | 0.6285246  | 1.0586634  | 1.1307582  | -1.00509   |             |                |
| DM13628P1 | 0.62854266 | -1.08574   | 1.1157173  | -1.1619521 |             |                |
| DM03703P3 | 0.62858117 | -1.1112558 | -1.0997618 | -1.0313704 |             |                |
| DM01903P2 | 0.6286284  | 1.1212238  | 1.176665   | 1.0722544  | PCK2        | NM_001039727.1 |
| DM02181P2 | 0.62873334 | -1.020148  | -1.103008  | 1.0595758  | LOC373388   | XM_001202943.1 |
| DM10224P2 | 0.628886   | 1.2327135  | 1.0307387  | 1.2098802  |             |                |
| DM07085P3 | 0.6289175  | 1.1048365  | -1.0600342 | 1.1270187  |             |                |
| DM06028P3 | 0.6289948  | -1.0201857 | 1.1239514  | 1.000263   | PECI        | NR_028588.1    |
| DM04352P1 | 0.629076   | 1.0091773  | 1.0438608  | -1.1009465 |             |                |
| DM06099P4 | 0.6293643  | -1.0241517 | -1.0938402 | -1.0700583 |             |                |
| DM00980P2 | 0.6293869  | -1.1775584 | -1.0246861 | -1.0777756 | WDR12       | NM_199410.1    |
| DM07584P1 | 0.62964106 | -1.0147321 | 1.1698633  | -1.0005778 |             |                |
| DM02121P3 | 0.6300516  | -1.1402566 | -1.0548198 | -1.1345627 | SMAD4       | NM_001097067.1 |
| DM07660P2 | 0.63006514 | 1.5477446  | 1.8960655  | 1.3169899  |             |                |
| DM05853P4 | 0.6300731  | 1.0249734  | 1.0558082  | -1.0864638 | ABTB1       | NM_001030598.1 |
| DM09782P1 | 0.6300938  | 1.1714528  | 1.0424713  | -1.0923039 |             |                |
| DM03103P1 | 0.6301719  | -1.1163584 | -1.1141781 | -1.0640023 | BRAFLDRAFT  | XM_002594769.1 |
| DM08659P3 | 0.6303066  | 1.1329279  | -1.003327  | -1.0180638 |             |                |
| DM13375P1 | 0.63031095 | 1.019351   | 1.0698647  | 1.1234385  |             |                |
| DM09357P1 | 0.63056576 | -1.090802  | -1.0079778 | 1.0928385  |             |                |



|           |            |            |            |            |             |                |
|-----------|------------|------------|------------|------------|-------------|----------------|
| DM03846P1 | 0.6306853  | -1.178295  | -1.3647519 | -1.2345961 |             |                |
| DM08890P2 | 0.63091844 | 1.3809824  | 1.1330068  | -1.0693557 |             |                |
| DM00304P3 | 0.6310417  | -1.0620703 | 1.0291202  | -1.0642931 | DYAK\GE122  | XM_002091351.1 |
| DM09519P1 | 0.63107204 | 1.075792   | 1.1031215  | 1.155389   |             |                |
| DM04126P2 | 0.6311042  | -1.0354382 | -1.1145724 | -1.043369  | MAGI2       | XM_002413474.1 |
| DM09045P3 | 0.63114345 | -1.2366062 | -1.1255047 | -1.0272502 |             |                |
| DM13103P1 | 0.6312416  | 1.1843361  | 1.3171933  | 1.146404   |             |                |
| DM02015P1 | 0.63129514 | 1.0871309  | -1.09416   | 1.0072905  | LOC1001174  | XM_001601651.1 |
| DM11098P4 | 0.6313207  | 1.0813147  | 1.3525734  | 1.4467461  |             |                |
| DM03721P2 | 0.63145673 | -1.0630255 | -1.0196402 | -1.0021437 |             |                |
| DM15299P1 | 0.63155276 | 1.1150634  | 1.3321652  | 1.1184068  |             |                |
| DM02100P1 | 0.6316391  | -1.0189229 | -1.12533   | -1.0281032 | DMOJ\GI132  | XM_002007911.1 |
| DM08001P2 | 0.63175297 | 1.0863471  | 1.060458   | -1.084385  |             |                |
| DM02925P2 | 0.6317988  | -1.0844158 | -1.1659847 | -1.0597122 | LOC726645   | XM_001120567.1 |
| DM04470P3 | 0.6318285  | -1.2128255 | -1.2640929 | 1.1476419  |             |                |
| DM15246P2 | 0.6318869  | 1.2352645  | -1.0153233 | 1.3936394  |             |                |
| DM09568P2 | 0.6318929  | -1.0379049 | 1.066827   | -1.1440064 |             |                |
| DM09300P2 | 0.6321007  | -1.0747119 | 1.0775298  | 1.0578502  |             |                |
| DM14619P1 | 0.63228554 | -1.0564958 | -1.0231984 | 1.0392714  |             |                |
| DM02013P3 | 0.6323355  | -1.0210167 | 1.0725161  | -1.0431801 | TRIADDRAFT  | XM_002111436.1 |
| DM15346P2 | 0.632433   | -1.1406872 | 1.0346075  | 1.0445079  |             |                |
| DM06548P1 | 0.6326633  | 1.0094067  | -1.3177649 | 1.030002   |             |                |
| DM07652P1 | 0.63306165 | -1.0332211 | 1.0779402  | -1.0543879 |             |                |
| DM04547P3 | 0.63306916 | -1.083072  | -1.0882663 | 1.0646355  |             |                |
| DM00300P1 | 0.63345265 | -1.1301203 | -1.0683341 | -1.1174257 | ROBL        | XM_001120569.1 |
| DM01614P3 | 0.63348407 | -1.0662566 | -1.1152874 | -1.1389586 | TUBB        | NM_001087257.1 |
| DM09289P1 | 0.6336355  | -1.0810745 | -1.0260022 | -1.145715  |             |                |
| DM11093P1 | 0.6337665  | -1.0212318 | 1.0984955  | 1.0259602  |             |                |
| DM01216P1 | 0.63384885 | 1.1581007  | 1.1986928  | 1.1630214  |             |                |
| DM15129P1 | 0.6341574  | -1.2236189 | 1.0284967  | -1.0246139 |             |                |
| DM13443P1 | 0.6342171  | -1.1170619 | 1.1423883  | 1.0837785  |             |                |
| DM04015P1 | 0.6343087  | 1.0554177  | 1.1126386  | 1.0864837  | DANA\GF142  | XM_001962841.1 |
| DM02740P2 | 0.6344097  | 1.0020156  | -1.1123013 | -1.1337641 | DANA\GF184  | XM_001954740.1 |
| DM01592P3 | 0.6345888  | 1.024618   | 1.0330857  | 1.089968   | DERE\GG103  | XM_001969847.1 |
| DM08029P2 | 0.63474303 | -1.3259948 | -1.2303208 | -1.0273973 |             |                |
| DM08175P2 | 0.63485426 | 1.0392486  | 1.1837683  | 1.1990007  |             |                |
| DM03776P2 | 0.63486654 | 1.0023524  | -1.0218236 | -1.0888461 |             |                |
| DM00892P2 | 0.6349434  | 1.0607263  | -1.0471176 | 1.1049609  | AAEL_AAEL0  | XM_001649342.1 |
| DM07001P1 | 0.63511175 | -1.066144  | -1.2101835 | -1.0168406 |             |                |
| DM04390P1 | 0.635201   | -1.2186557 | -1.0650501 | -1.0517691 | DSEC\GM147  | XM_002035425.1 |
| DM06009P1 | 0.63522923 | 1.0290697  | -1.0567253 | -1.0893114 |             |                |
| DM11418P3 | 0.6353731  | 1.0305268  | 1.1239994  | 1.0625567  |             |                |
| DM01186P1 | 0.63543797 | 1.1052212  | 1.1601485  | 1.020629   | OVGP        | XM_001848251.1 |
| DM10660P2 | 0.635512   | -1.0616701 | 1.1157848  | 1.0884641  |             |                |
| DM13746P3 | 0.6355219  | -1.1940356 | -1.069782  | 1.0476203  |             |                |
| DM13105P1 | 0.63572484 | 1.1082426  | 1.0652558  | -1.0036509 |             |                |
| DM12467P2 | 0.63573813 | -1.0030824 | 1.0583382  | 1.1069343  | NFIA_07989C | XM_001259943.1 |
| DM00823P2 | 0.6359996  | -1.0259111 | -1.0391159 | -1.0832394 | KPNA4       | NM_008467.4    |
| DM13255P2 | 0.63611895 | -1.0002375 | -1.0506929 | -1.0853053 | DGRI\GH167  | XM_001984867.1 |
| DM09067P1 | 0.6362513  | 1.1027745  | 1.0831943  | 1.0255923  |             |                |

|           |            |            |            |            |             |                |
|-----------|------------|------------|------------|------------|-------------|----------------|
| DM00846P3 | 0.63636863 | 1.0384251  | 1.0949743  | 1.068779   | LOC413435   | XM_396879.3    |
| DM01322P1 | 0.6363752  | -1.0266074 | -1.0218685 | -1.2400285 |             |                |
| DM13916P3 | 0.6363752  | -1.1584466 | 1.2171599  | -1.1179042 |             |                |
| DM14573P1 | 0.6364122  | 1.1105138  | 1.0464892  | 1.0984095  |             |                |
| DM03982P3 | 0.6364391  | 1.0308834  | -1.0622293 | -1.0640659 |             |                |
| DM10951P1 | 0.6364524  | 1.0089216  | 1.1159806  | 1.0645614  |             |                |
| DM09536P3 | 0.63660705 | 1.0471094  | 1.121387   | 1.0964344  |             |                |
| DM12362P1 | 0.63662446 | 1.2400663  | -1.0297817 | 1.3327457  |             |                |
| DM11841P3 | 0.6366383  | 1.2109479  | 1.2615135  | -1.2270133 | DPER\GL1376 | XM_002020010.1 |
| DM07476P1 | 0.63667166 | -1.0099107 | -1.2790035 | -1.0915622 |             |                |
| DM11441P1 | 0.6368268  | 1.1649913  | -1.3269438 | 1.2996901  |             |                |
| DM03966P3 | 0.63688904 | 1.0389216  | -1.0783842 | -1.0223511 |             |                |
| DM14582P1 | 0.637027   | 1.2559409  | 1.1048069  | 1.0436234  |             |                |
| DM07493P2 | 0.63755035 | 1.075926   | 1.0880166  | 1.153715   |             |                |
| DM10396P4 | 0.63763386 | -1.2880958 | -1.3211354 | -1.2492085 |             |                |
| DM02682P3 | 0.63769275 | 1.4452792  | 1.0875953  | 1.1516471  | BRAFLDRAFT  | XM_002600253.1 |
| DM13214P2 | 0.63777435 | -1.1027678 | -1.2829769 | -1.1310129 |             |                |
| DM08636P2 | 0.6377952  | -1.0512172 | -1.3307763 | -1.0072812 |             |                |
| DM09393P1 | 0.63790375 | -1.0094587 | 1.1470113  | 1.0580342  |             |                |
| DM08514P1 | 0.6379924  | 1.1133146  | 1.039862   | 1.0405697  |             |                |
| DM14107P1 | 0.6380709  | 1.0273842  | 1.2780639  | 1.1072397  |             |                |
| DM14127P2 | 0.6380847  | -1.0771523 | -1.1056795 | 1.0088185  |             |                |
| DM08232P2 | 0.63820755 | -1.0202811 | 1.025282   | 1.1079913  |             |                |
| DM01147P4 | 0.63824654 | 1.4043982  | 1.2812158  | 1.1277094  | DNAL1       | NM_001046427.1 |
| DM03198P3 | 0.63831633 | 1.084463   | 1.1072809  | 1.0795991  |             |                |
| DM02871P1 | 0.6383541  | 1.0373334  | 1.054589   | -1.046158  | ZGC:113291  | NM_001017897.1 |
| DM04937P3 | 0.63838273 | -1.0605682 | 1.1150599  | 1.440229   |             |                |
| DM07971P3 | 0.63841665 | -1.100924  | 1.0465924  | -1.0902624 |             |                |
| DM03016P1 | 0.63848376 | -1.0391536 | 1.0509741  | -1.0719597 | LOC1001222  | XM_001605770.1 |
| DM05268P3 | 0.6390037  | -1.0289004 | 1.0839876  | 1.1817385  | DMOJ\GI1556 | XM_002009803.1 |
| DM09882P3 | 0.6390483  | -1.042007  | 1.0581894  | -1.2738614 |             |                |
| DM13980P2 | 0.6390708  | 1.0653262  | 1.202392   | 1.182737   |             |                |
| DM11234P2 | 0.6390849  | 1.0653781  | 1.0522958  | 1.0437077  | THAPSDRAFT  | XM_002285900.1 |
| DM09443P4 | 0.63914067 | -1.0019119 | 1.0997608  | 1.0863045  |             |                |
| DM07412P2 | 0.6391923  | -1.1196702 | -1.1504347 | -1.0785478 |             |                |
| DM14536P1 | 0.63931715 | 1.1631552  | -1.0253613 | 1.0687863  |             |                |
| DM03191P3 | 0.6393397  | -1.1924464 | -1.0211879 | 1.0790566  |             |                |
| DM05453P1 | 0.63942677 | 1.1079471  | 1.0708382  | 1.0820644  |             |                |
| DM04448P2 | 0.63966584 | -1.1466432 | -1.0880466 | 1.0556922  | DERE\GG156  | XM_001972555.1 |
| DM11193P3 | 0.6400001  | 1.0551486  | -1.035986  | 1.1722113  |             |                |
| DM01574P4 | 0.6401085  | -1.063054  | -1.0384768 | 1.0110893  | PP1G        | NM_001141712.1 |
| DM02045P1 | 0.64015317 | 1.0434566  | 1.0761853  | -1.0417256 | DMOJ\GI1956 | XM_002004513.1 |
| DM14075P1 | 0.6402019  | -1.2263557 | 1.0570114  | 1.1315309  |             |                |
| DM14636P3 | 0.64049137 | -1.065393  | 1.0735091  | 1.0192081  |             |                |
| DM14314P2 | 0.6404926  | -1.128458  | -1.1015075 | 1.0545604  |             |                |
| DM13320P1 | 0.64060104 | -1.1313543 | -1.0498332 | 1.020259   |             |                |
| DM04030P4 | 0.640885   | -1.1592124 | 1.0022187  | -1.3129694 |             |                |
| DM06668P3 | 0.6410367  | -1.0132376 | 1.0414075  | 1.1160073  |             |                |
| DM02351P1 | 0.6410996  | -1.0865214 | -1.1273863 | -1.0202856 | PGD         | NM_002631.2    |
| DM11587P3 | 0.64111656 | 1.2756867  | 1.0016005  | -1.027979  |             |                |

|           |            |            |            |            |            |                |
|-----------|------------|------------|------------|------------|------------|----------------|
| DM09939P1 | 0.6411477  | -1.0658755 | 1.0848312  | 1.179891   |            |                |
| DM04747P1 | 0.6415689  | -1.2278316 | -1.123552  | -1.2776537 |            |                |
| DM10805P1 | 0.64164585 | -1.0398562 | -1.1178639 | -1.0087544 | LOC658998  | XM_965339.2    |
| DM06830P2 | 0.6417527  | 1.3403035  | 1.4338605  | -1.0426458 |            |                |
| DM08622P3 | 0.64184064 | -1.1449813 | 1.1594061  | -1.0340586 |            |                |
| DM03334P4 | 0.6418518  | 1.0485175  | -1.0200423 | -1.1119522 |            |                |
| DM01457P2 | 0.64186174 | 1.1132795  | 1.0715032  | -1.0112659 |            |                |
| DM03706P1 | 0.6422074  | 1.2785143  | -1.0659178 | -1.0052968 |            |                |
| DM11802P2 | 0.6425997  | 1.0501386  | -1.0114977 | 1.0237516  |            |                |
| DM06161P1 | 0.64301723 | 1.293635   | 1.7981142  | 1.0297154  |            |                |
| DM06599P2 | 0.643199   | 1.1173196  | 1.3459779  | 1.1449552  |            |                |
| DM13496P1 | 0.643252   | 1.2197139  | 1.047872   | 1.100355   |            |                |
| DM10298P3 | 0.6433028  | -1.0359927 | 1.0190325  | 1.104207   |            |                |
| DM03765P1 | 0.6435379  | 1.0660731  | 1.0349275  | -1.0145676 |            |                |
| DM05489P3 | 0.6437222  | 1.087245   | -1.2371428 | -1.5636401 |            |                |
| DM09098P1 | 0.64389217 | 1.0151958  | -1.0837609 | 1.0476322  |            |                |
| DM07360P4 | 0.64402956 | -1.0771159 | -1.019161  | -1.238352  |            |                |
| DM01512P1 | 0.6440347  | 1.0912672  | 1.0550714  | -1.0431943 | DERE\GG215 | XM_001974053.1 |
| DM00511P1 | 0.6442246  | -1.1910008 | -1.1567357 | -1.0896164 | CHIA       | XM_001857818.1 |
| DM10291P1 | 0.64431655 | 1.196902   | 1.2238137  | 1.0526364  |            |                |
| DM06920P1 | 0.6448766  | 1.0147122  | -1.0684929 | -1.2190826 |            |                |
| DM06205P1 | 0.64571357 | -1.0715637 | 1.0663857  | 1.0483803  | DWIL\GK102 | XM_002071839.1 |
| DM02079P3 | 0.64588255 | 1.1457503  | 1.0941948  | -1.1614298 | LOC1000681 | XM_001498073.2 |
| DM02001P3 | 0.6461874  | -1.2682025 | -1.0544173 | -1.5201823 | VTG6       | NM_001025189.1 |
| DM09589P2 | 0.6463333  | 1.072341   | 1.1099564  | 1.0089823  |            |                |
| DM06691P2 | 0.64638466 | 1.6146967  | 1.9022151  | 1.286052   |            |                |
| DM03120P2 | 0.6464003  | 1.5666733  | 1.1837033  | 1.2284977  |            |                |
| DM15265P2 | 0.6464022  | 1.1078585  | -1.1896741 | -1.145484  |            |                |
| DM07109P1 | 0.6465552  | -1.0689816 | -1.1462096 | 1.1631109  |            |                |
| DM13993P1 | 0.6466117  | -1.1762097 | -1.0162166 | -1.2772976 |            |                |
| DM06354P1 | 0.64677536 | 1.0938417  | 1.2885823  | 1.2469419  |            |                |
| DM15107P1 | 0.6468105  | -1.1611692 | -1.2158625 | -1.4070704 |            |                |
| DM09837P2 | 0.64687866 | 1.0637656  | 1.1985298  | 1.2120199  |            |                |
| DM05300P2 | 0.64689374 | -1.0236471 | -1.1763189 | -1.1401325 |            |                |
| DM06284P4 | 0.64695275 | 1.2189984  | 1.253264   | 1.2962645  |            |                |
| DM10508P4 | 0.6470054  | 1.1127256  | -1.0803111 | 1.0611745  |            |                |
| DM12700P1 | 0.6470604  | -1.311397  | -1.1501911 | -1.2536582 |            |                |
| DM00734P2 | 0.64721197 | -1.0652527 | 1.1391726  | 1.1588373  | LOC663877  | XM_969907.2    |
| DM06640P2 | 0.64722    | 1.0010532  | -1.1550808 | -1.1093663 |            |                |
| DM09511P2 | 0.64731723 | -1.116367  | -1.1940765 | -1.3809317 |            |                |
| DM13130P3 | 0.64741886 | 1.0049028  | -1.3873523 | 1.0848973  |            |                |
| DM08315P2 | 0.64755607 | -1.15959   | -1.0261797 | 1.2562929  |            |                |
| DM12257P3 | 0.6475856  | -1.0930705 | -1.2036369 | -1.1042433 | DSEC\GM201 | XM_002033980.1 |
| DM00854P4 | 0.6477803  | 1.019084   | 1.0351883  | -1.0400336 | DWIL\GK162 | XM_002067266.1 |
| DM15080P2 | 0.6478366  | -1.0846637 | -1.0020627 | 1.0723462  |            |                |
| DM09016P3 | 0.64834034 | -1.0601968 | -1.1535506 | -1.2066244 |            |                |
| DM10075P2 | 0.6485232  | -1.0238917 | 1.2124083  | -1.1496955 |            |                |
| DM02213P3 | 0.64859736 | -1.0388607 | -1.0047505 | 1.0151488  | AGAP_AGAP0 | XM_320884.4    |
| DM04889P2 | 0.64880514 | -1.1066074 | 1.2022065  | 1.0823066  |            |                |
| DM13258P2 | 0.64888906 | 1.1409024  | 1.0427023  | 1.1775244  | LOC1000510 | XM_001488392.2 |

|           |            |            |            |            |            |                |
|-----------|------------|------------|------------|------------|------------|----------------|
| DM01779P4 | 0.6490737  | -1.199169  | -1.2426062 | -1.3265212 | NEMVEDRAFT | XM_001630433.1 |
| DM10640P1 | 0.6491545  | 1.1397122  | -1.1853034 | 1.2164448  |            |                |
| DM10265P3 | 0.6492374  | -1.082957  | -1.2595208 | -1.0123872 |            |                |
| DM01464P1 | 0.64937186 | -1.0032648 | 1.0486215  | -1.0210776 | DSIM\GD260 | XM_002080833.1 |
| DM08897P1 | 0.6494653  | -1.2155039 | -1.1138117 | -1.0291526 |            |                |
| DM14545P4 | 0.6495446  | 1.02122    | 1.0400656  | -1.0534381 |            |                |
| DM11306P1 | 0.64970446 | -1.0990878 | 1.0383209  | 1.0088698  |            |                |
| DM03113P1 | 0.64978033 | 1.0881952  | -1.0833598 | 1.0011547  | UBA3       | XM_001662362.1 |
| DM03660P2 | 0.6498048  | -1.0115018 | -1.0128422 | 1.0983319  | CYP        | XM_001656715.1 |
| DM01624P1 | 0.6500464  | -1.053309  | 1.0676266  | 1.0777128  | LOC550976  | XM_623371.2    |
| DM06964P1 | 0.6502165  | 1.0740179  | 1.0359142  | 1.0067633  |            |                |
| DM10538P3 | 0.65036714 | -1.0790383 | -1.0510719 | -1.1165385 |            |                |
| DM02101P2 | 0.6504077  | -1.0034717 | -1.0832108 | -1.1006136 | TRIADDRAFT | XM_002110760.1 |
| DM06357P2 | 0.6505359  | -1.0316669 | 1.032933   | -1.1383691 |            |                |
| DM12458P1 | 0.6506389  | 1.1327754  | -1.1826634 | -1.0051167 |            |                |
| DM07424P3 | 0.6507043  | -1.0833727 | 1.0344847  | 1.0004277  |            |                |
| DM05983P1 | 0.65077907 | 1.100458   | 1.6167166  | 1.2650908  | CP         | XM_001868201.1 |
| DM01963P3 | 0.6509818  | -1.0044514 | 1.0258067  | 1.0104376  | LOC552756  | XM_625132.2    |
| DM14467P2 | 0.65111756 | 1.2073318  | 1.2120765  | 1.1672316  |            |                |
| DM08479P1 | 0.6511945  | -1.2128783 | -1.0361692 | 1.0475858  |            |                |
| DM03135P1 | 0.6513313  | 1.0784085  | 1.2608554  | 1.3408785  | DMOJ\GI198 | XM_002004276.1 |
| DM05412P4 | 0.65145683 | -1.0011916 | 1.3079565  | 1.0335245  |            |                |
| DM06391P2 | 0.6515133  | 1.0085449  | 1.1498793  | -1.147022  | DYAK\GE261 | XM_002097194.1 |
| DM14719P3 | 0.6516108  | -1.2006991 | -1.1270319 | -1.0995611 |            |                |
| DM03358P1 | 0.65175295 | -1.0885739 | -1.0002406 | -1.0267909 | LOC1002093 | XM_002156229.1 |
| DM13710P2 | 0.6517691  | -1.2509747 | 1.1583766  | -1.143532  |            |                |
| DM09676P1 | 0.65178496 | 1.2112727  | 1.3370594  | 1.2525985  |            |                |
| DM03715P1 | 0.6518011  | -1.0695537 | 1.0089623  | 1.2245829  | DYAK\GE117 | XM_002092237.1 |
| DM08292P2 | 0.6518913  | -1.0031763 | 1.0207416  | 1.00879    |            |                |
| DM10827P1 | 0.6521237  | 1.1399683  | 1.0111237  | 1.1361593  |            |                |
| DM14672P4 | 0.6521906  | -1.024366  | 1.2067662  | 1.068186   |            |                |
| DM01222P3 | 0.65220284 | -1.1190714 | -1.1459416 | -1.2565753 |            |                |
| DM06001P1 | 0.65226936 | 1.1409439  | -1.0027796 | 1.1950454  | NEMY       | NM_001169659.1 |
| DM11938P1 | 0.65231943 | 1.1649119  | 1.3379408  | 1.0968182  |            |                |
| DM13042P1 | 0.65246636 | -1.0255107 | -1.2416177 | 1.093841   |            |                |
| DM05999P1 | 0.6525052  | -1.1447041 | 1.0190014  | 1.0574944  |            |                |
| DM04868P1 | 0.652778   | -1.0008548 | 1.0406458  | -1.0130689 |            |                |
| DM11315P1 | 0.6529526  | -1.0343028 | 1.0070529  | -1.1405835 |            |                |
| DM00176P2 | 0.6532417  | -1.2170798 | -1.0382886 | -1.1539221 | DMOJ\GI202 | XM_002005046.1 |
| DM13119P2 | 0.6533243  | -1.0002065 | -1.0450041 | 1.0368315  |            |                |
| DM10703P1 | 0.6535053  | -1.0890998 | -1.0119773 | -1.0086339 |            |                |
| DM04298P3 | 0.6535371  | -1.1017975 | 1.1405554  | 1.0336579  | LOC553309  | XM_001919304.1 |
| DM07450P3 | 0.65355694 | -1.0674682 | 1.0241537  | 1.0449241  |            |                |
| DM02904P2 | 0.6536073  | 1.0233201  | 1.1302367  | 1.1196463  | LOC551379  | XM_623774.2    |
| DM05139P3 | 0.6536555  | -1.2470284 | -1.2379249 | -1.4214176 |            |                |
| DM07918P1 | 0.6538003  | -1.1272485 | -1.0388179 | -1.0450572 |            |                |
| DM01748P1 | 0.65384996 | -1.1141989 | -1.0932614 | 1.020353   |            |                |
| DM05938P1 | 0.65419155 | 1.0006973  | 1.031609   | 1.1243248  |            |                |
| DM11189P3 | 0.6544605  | 1.0205204  | -1.1231357 | -1.021299  |            |                |
| DM03504P3 | 0.65465605 | 1.2067189  | -1.0903977 | 1.1830646  |            |                |

|           |            |            |            |            |                           |
|-----------|------------|------------|------------|------------|---------------------------|
| DM07824P2 | 0.65471697 | 1.1589122  | -1.0306416 | -1.0981659 |                           |
| DM11510P2 | 0.6548433  | -1.0794724 | 1.1306156  | -1.1224817 |                           |
| DM05198P2 | 0.65490717 | 1.1513236  | -1.0529143 | -1.032693  |                           |
| DM14544P1 | 0.6553371  | -1.09633   | 1.0347159  | -1.0203019 |                           |
| DM00807P3 | 0.6553459  | 1.3158727  | 1.3538285  | 1.2866514  | DANA\GF157\XM_001962932.1 |
| DM13190P2 | 0.65536964 | -1.124488  | -1.0259452 | 1.0406601  | FIB XM_002092515.1        |
| DM06533P1 | 0.65570295 | 1.1036562  | -1.0663946 | 1.0082568  |                           |
| DM14988P2 | 0.6558151  | -1.1862478 | -1.2103631 | -1.0948147 |                           |
| DM04750P1 | 0.6559062  | -1.2436163 | -1.0191312 | -1.139678  | AGAP_AGAP0 XM_315378.2    |
| DM15180P1 | 0.6565696  | -1.0703194 | -1.0448781 | 1.1141657  |                           |
| DM04595P1 | 0.65661836 | -1.066904  | 1.1036294  | 1.1280557  |                           |
| DM13152P1 | 0.6568867  | -1.0339735 | -1.0709162 | -1.1347523 |                           |
| DM01061P3 | 0.6569289  | -1.1975027 | 1.0186818  | 1.0319079  | LOC580355 XM_780418.2     |
| DM13283P1 | 0.6570122  | -1.0730402 | -1.3398561 | 1.0176572  | DANA\GF229\XM_001964682.1 |
| DM11409P4 | 0.6570377  | 1.0945511  | 1.0926406  | 1.2937036  |                           |
| DM05806P3 | 0.65717787 | 1.0152574  | -1.3104701 | 1.1651753  |                           |
| DM03646P1 | 0.6573453  | -1.0247397 | -1.1102504 | -1.0979886 |                           |
| DM04099P3 | 0.6573973  | 1.1761217  | 1.0677613  | 1.0225819  | ISCW_ISCWC XM_002416101.1 |
| DM05145P1 | 0.6574365  | -1.0327883 | -1.0469737 | 1.1746378  |                           |
| DM05200P3 | 0.6575858  | 1.0831289  | -1.0941873 | -1.0965348 |                           |
| DM15060P3 | 0.657701   | -1.1090027 | -1.0378377 | 1.0406075  |                           |
| DM03520P1 | 0.6577677  | -1.061896  | -1.1191628 | -1.1069282 | HCAG_05266 XM_001539749.1 |
| DM10282P1 | 0.65791535 | 1.1775914  | 1.1079094  | -1.0241423 |                           |
| DM04455P1 | 0.658087   | -1.0056658 | 1.0678964  | 1.0276232  | LOC582286 XM_782245.2     |
| DM13868P2 | 0.65830946 | -1.1015077 | 1.0227171  | 1.0588655  |                           |
| DM06170P1 | 0.6583477  | 1.0050652  | 1.0808734  | 1.1623094  | DMOJ\GI155\XM_002009811.1 |
| DM01073P2 | 0.6583779  | -1.0779296 | -1.0837656 | -1.067289  | MCEE XM_515538.2          |
| DM09718P3 | 0.6585101  | -1.3138189 | -1.152067  | -1.1090491 |                           |
| DM13163P2 | 0.658541   | -1.1209823 | 1.0316657  | 1.1224278  |                           |
| DM10993P3 | 0.6591519  | -1.1388578 | -1.0767409 | -1.0567702 |                           |
| DM11638P1 | 0.6592493  | -1.0451479 | 1.03348    | 1.1492609  |                           |
| DM14965P3 | 0.6592967  | 1.2097311  | -1.0802369 | 1.086374   |                           |
| DM08347P3 | 0.65949744 | 1.2034702  | 1.3097892  | -1.2084222 |                           |
| DM08742P3 | 0.6596342  | -1.0752703 | 1.3887243  | -1.0304203 |                           |
| DM07189P2 | 0.65968597 | 1.0348657  | -1.0656277 | 1.0184186  |                           |
| DM08699P2 | 0.6597542  | 1.6144229  | 1.3148179  | 1.4409446  |                           |
| DM04953P1 | 0.6598021  | -1.2618281 | 1.3748786  | -2.1304872 |                           |
| DM04032P3 | 0.659819   | 1.8243706  | 1.1761094  | 1.5157806  |                           |
| DM15143P1 | 0.6599194  | 1.129607   | 1.0518634  | 1.0879743  |                           |
| DM04312P2 | 0.66017497 | -1.0758251 | -1.0867779 | 1.0281336  |                           |
| DM07594P1 | 0.6601838  | 1.0342956  | 1.1191844  | 1.0312332  |                           |
| DM04424P4 | 0.66037434 | 1.2988076  | 1.3287112  | 1.3216947  |                           |
| DM11851P1 | 0.66043794 | 1.0429996  | 1.0570856  | -1.0778626 |                           |
| DM00705P1 | 0.6604529  | 1.0882716  | -1.0462356 | 1.0206633  |                           |
| DM04137P3 | 0.6605249  | 1.092533   | 1.0849733  | -1.0223151 |                           |
| DM00307P3 | 0.660614   | 1.0465937  | 1.0827216  | 1.2058296  | AGAP_AGAP0 XM_001688766.1 |
| DM06458P2 | 0.6607852  | 1.0047307  | -1.5007389 | 1.0376132  |                           |
| DM10012P3 | 0.66101116 | -1.0397238 | 1.0559266  | 1.0286243  |                           |
| DM07950P3 | 0.66117555 | -1.0506691 | -1.0263959 | -1.0924417 |                           |
| DM09388P3 | 0.66122097 | 1.0599958  | -1.0178753 | -1.0346465 |                           |

|           |            |            |            |            |            |                |
|-----------|------------|------------|------------|------------|------------|----------------|
| DM04871P2 | 0.66125613 | -1.121376  | -1.2670748 | -1.0693601 |            |                |
| DM06106P1 | 0.66125834 | -1.0657107 | 1.1060592  | -1.0348364 |            |                |
| DM07325P2 | 0.6613239  | -1.0201703 | -1.0139301 | -1.11072   | DGRI\GH167 | XM_001984858.1 |
| DM06566P1 | 0.66134036 | -1.0127002 | -1.0319124 | 1.0950708  | LOC658378  | XM_964772.2    |
| DM10760P1 | 0.66171974 | -1.1101152 | -1.0893382 | -1.1054908 |            |                |
| DM06902P1 | 0.6617392  | -1.0005453 | 1.0176674  | 1.2952188  |            |                |
| DM12609P1 | 0.6618129  | -1.1044116 | -1.0393032 | -1.0631716 |            |                |
| DM12244P2 | 0.6618141  | -1.0190558 | -1.0076329 | -1.0901812 |            |                |
| DM01672P3 | 0.6618928  | 1.1002636  | 1.2125529  | 1.247329   | LOC581580  | XM_781569.2    |
| DM05159P3 | 0.66197264 | 1.0116886  | 1.0738966  | 1.0240332  |            |                |
| DM09859P1 | 0.66206676 | -1.1889547 | 1.2084732  | 1.0101373  |            |                |
| DM12709P3 | 0.66208863 | 1.0784572  | 1.2745473  | 1.0383676  |            |                |
| DM11634P2 | 0.66212255 | -1.0506948 | 1.03133    | -1.0535588 | PY05695    | XM_721098.1    |
| DM10604P3 | 0.66216314 | -1.0418091 | -1.0674218 | 1.0534434  |            |                |
| DM15127P3 | 0.6623079  | 1.16052    | 1.0561949  | -1.0066602 |            |                |
| DM12895P2 | 0.66231894 | 1.0246564  | 1.065637   | 1.0693725  |            |                |
| DM11604P1 | 0.6624065  | 1.0393456  | -1.0080115 | -1.0743202 | SLC9A3     | NM_001081060.1 |
| DM12580P3 | 0.66266686 | -1.0068177 | 1.1766748  | 1.1944575  |            |                |
| DM02423P1 | 0.6626993  | 1.0138326  | -1.0630168 | -1.0581454 | LOC551958  | XM_624340.2    |
| DM06443P4 | 0.6627059  | -1.010708  | -1.1712575 | 1.0726967  |            |                |
| DM03233P3 | 0.66271967 | -1.0462699 | -1.0290033 | -1.1458515 | LOC1000226 | XM_001374378.1 |
| DM14043P3 | 0.66282225 | 1.0163908  | -1.270026  | -1.3570344 |            |                |
| DM01637P3 | 0.6630393  | -1.0347365 | -1.0941187 | -1.0844208 | RPS12A     | NM_001087125.1 |
| DM06939P4 | 0.663091   | 1.0314305  | 1.0971049  | 1.1361293  |            |                |
| DM12227P2 | 0.66323906 | 1.0576497  | -1.0168684 | -1.2107595 |            |                |
| DM03988P2 | 0.66326416 | 1.4208851  | 1.970012   | 1.1484     |            |                |
| DM00108P2 | 0.6633384  | -1.1493677 | -1.2053355 | -1.0717978 | LOC551599  | XM_623990.2    |
| DM00310P3 | 0.6634188  | 1.1105775  | 1.0579237  | 1.1330405  | LOC660754  | XM_966960.2    |
| DM09987P2 | 0.6634963  | -1.0023223 | -1.1539536 | 1.0310712  |            |                |
| DM03795P1 | 0.66354406 | 1.338102   | -1.2916709 | 1.043504   | LOC1001815 | XM_002131869.1 |
| DM09746P3 | 0.6636358  | -1.0639945 | 1.2406514  | -1.2580222 |            |                |
| DM14145P2 | 0.66364145 | -1.1818762 | -1.2924436 | -1.4057981 |            |                |
| DM06293P1 | 0.66371524 | -1.0058236 | -1.1069096 | -1.1617298 | LOC1001189 | XM_001602734.1 |
| DM13795P3 | 0.66388845 | 1.0705252  | 1.29597    | -1.0107356 |            |                |
| DM10889P2 | 0.6639886  | -1.0307136 | -1.098376  | 1.1238555  |            |                |
| DM14569P3 | 0.66415125 | -1.1948397 | -1.1130435 | 1.1606866  |            |                |
| DM07741P1 | 0.66434634 | 1.0152577  | 1.1089818  | 1.0592117  |            |                |
| DM11362P3 | 0.6645679  | 1.1472225  | -1.0017296 | -1.1217667 |            |                |
| DM11698P1 | 0.664608   | -1.0823734 | -1.0053709 | -1.1694138 |            |                |
| DM07526P3 | 0.664638   | 1.0335346  | 1.0180435  | -1.1327996 |            |                |
| DM10341P2 | 0.66467416 | -1.0739964 | 1.0314505  | -1.011445  |            |                |
| DM10076P4 | 0.66469955 | -1.0825996 | -1.0679204 | 1.0156924  | DYAK\GE205 | XM_002093787.1 |
| DM01525P4 | 0.6647687  | -1.028211  | -1.0265481 | -1.1642768 |            |                |
| DM13187P1 | 0.6651505  | 1.0629147  | 1.3688658  | 1.2190024  |            |                |
| DM04832P3 | 0.6652729  | 1.005981   | 1.030495   | -1.0684209 |            |                |
| DM05448P3 | 0.6653123  | -1.1555176 | -1.2057512 | -1.247356  |            |                |
| DM00978P2 | 0.6653812  | -1.1822054 | 1.1453587  | -1.0422423 | BRAFLDRAFT | XM_002611908.1 |
| DM01926P1 | 0.6654083  | -1.0253453 | 1.0597873  | -1.0577471 | DGRI\GH248 | XM_001992647.1 |
| DM09333P3 | 0.6655093  | -1.0666496 | 1.0436335  | -1.1032034 |            |                |
| DM07423P3 | 0.66571116 | 1.0886016  | 1.1144831  | -1.07414   |            |                |

|           |            |            |            |            |                           |
|-----------|------------|------------|------------|------------|---------------------------|
| DM14992P1 | 0.66583455 | -1.1430603 | 1.1360629  | 1.0795448  | LOC1000167:XM_001370463.1 |
| DM07881P2 | 0.6659257  | 1.0630906  | 1.2036709  | 1.3189766  |                           |
| DM02249P3 | 0.66594124 | 1.0262725  | -1.0683892 | 1.0208327  |                           |
| DM07973P3 | 0.66597646 | 1.0689726  | 1.019262   | 1.0624909  |                           |
| DM09659P3 | 0.6659863  | 1.0894574  | 1.0361035  | 1.1440086  |                           |
| DM03973P1 | 0.6660466  | -1.1521543 | -1.0575577 | -1.1008303 |                           |
| DM07192P3 | 0.666075   | 1.0063087  | 1.1369473  | -1.2985988 |                           |
| DM12775P2 | 0.6661666  | 1.1633345  | -1.0442808 | -1.0857091 |                           |
| DM12639P4 | 0.6661831  | -1.0291289 | -1.1164414 | 1.216932   |                           |
| DM13345P3 | 0.66622424 | 1.1031581  | 1.180279   | 1.0475771  |                           |
| DM09492P1 | 0.6662306  | 1.1041383  | 1.3823435  | 1.353274   |                           |
| DM05661P1 | 0.66631216 | 1.1138471  | 1.0529418  | 1.0693572  |                           |
| DM09671P2 | 0.6663149  | 1.1506035  | 1.1268184  | -1.0802898 |                           |
| DM07541P3 | 0.66643065 | -1.1342901 | -1.3630811 | -1.2722102 |                           |
| DM13469P2 | 0.66648835 | -1.0390459 | -1.3434703 | 1.02868    |                           |
| DM01792P2 | 0.6666379  | 1.0101312  | 1.119569   | 1.3078033  | DWIL\GK165:XM_002062567.1 |
| DM01026P4 | 0.6666938  | -1.0315104 | 1.074111   | -1.1067632 | ISCW_ISCWC XM_002410744.1 |
| DM15058P1 | 0.6666983  | -1.0071235 | -1.3062073 | -1.0361054 |                           |
| DM10057P3 | 0.6668717  | -1.0245016 | -1.076389  | -1.1175163 |                           |
| DM14843P1 | 0.6668784  | -1.0988984 | -1.4408875 | -1.1089103 |                           |
| DM12767P2 | 0.6669028  | -1.2917701 | -1.5331217 | 1.1962605  |                           |
| DM14815P4 | 0.66700554 | 1.020517   | 1.2126012  | 1.3829429  |                           |
| DM00150P1 | 0.6672811  | 1.2817202  | 1.3744967  | 1.4088156  | DMOJ\GI199:XM_002004425.1 |
| DM12153P1 | 0.6673299  | -1.064867  | -1.0295992 | -1.0079069 |                           |
| DM02169P4 | 0.6673521  | 1.2986883  | -1.0258389 | 1.1111667  | ABCG1 XM_416742.2         |
| DM08244P1 | 0.6673688  | -1.3816614 | 1.0492078  | -1.0116525 |                           |
| DM11119P1 | 0.6674262  | 1.0420299  | 1.1373508  | 1.0567052  |                           |
| DM05973P4 | 0.6675098  | -1.0236534 | -1.0554268 | -1.1657525 | LOC656679 XM_963188.2     |
| DM08473P2 | 0.6675379  | -1.3014058 | -1.1106548 | -1.1471899 |                           |
| DM08946P2 | 0.6675705  | -1.067544  | 1.058079   | 1.6006373  |                           |
| DM14026P1 | 0.6676358  | 1.1623209  | 1.2770859  | 1.3687583  |                           |
| DM05947P2 | 0.6678042  | -1.0734903 | -1.2205886 | -1.3076229 |                           |
| DM04733P4 | 0.6678784  | 1.1807153  | 1.3430427  | 1.1017904  |                           |
| DM14268P3 | 0.66811186 | 1.0017618  | -1.0737716 | -1.1339152 | LOC1002283:XR_054793.1    |
| DM03876P2 | 0.66817725 | -1.0991205 | -1.0825042 | -1.1188016 |                           |
| DM07161P3 | 0.66822356 | -1.0928948 | -1.0555592 | -1.0593913 |                           |
| DM12397P1 | 0.66836244 | -1.0556515 | 1.0453423  | 1.0114609  |                           |
| DM00500P1 | 0.6686633  | -1.1442916 | 1.0482955  | -1.0960358 | DANA\GF171:XM_001953639.1 |
| DM14763P1 | 0.66878617 | -1.1931227 | -1.1689188 | 1.0789645  |                           |
| DM06436P3 | 0.66882783 | -1.2574328 | -1.1074327 | -1.0613686 |                           |
| DM14264P4 | 0.6688816  | 1.0183468  | 1.1442027  | 1.0304519  |                           |
| DM11632P1 | 0.66896945 | 1.1230781  | 1.0753787  | -1.021258  |                           |
| DM11750P4 | 0.66956604 | 1.0817688  | -1.3168588 | 1.1421556  |                           |
| DM13564P4 | 0.6696139  | -1.0886534 | 1.0681257  | 1.0196457  |                           |
| DM05664P1 | 0.6697089  | -1.0570918 | 1.0731703  | 1.0250602  |                           |
| DM05913P1 | 0.66971487 | -1.0151124 | 1.0414166  | -1.03563   |                           |
| DM01730P3 | 0.67001027 | 1.0158157  | 1.0598097  | 1.1425139  | DWIL\GK158:XM_002063751.1 |
| DM01190P1 | 0.6701722  | -1.1059431 | -1.0680555 | -1.0343755 | LOC1001842:XM_002128093.1 |
| DM13268P2 | 0.67023116 | 1.0013019  | -1.1317328 | 1.0093609  |                           |
| DM03150P1 | 0.6702717  | -1.0883191 | 1.0312753  | 1.0044072  | AGAP_AGAP0 XM_321497.2    |

|           |            |            |            |            |                           |                |
|-----------|------------|------------|------------|------------|---------------------------|----------------|
| DM12743P3 | 0.67045236 | 1.052316   | 1.1215782  | 1.0102926  |                           |                |
| DM09370P1 | 0.67048746 | -1.1570218 | 1.0436306  | 1.0362169  |                           |                |
| DM12036P2 | 0.67050594 | -1.1312126 | -1.0113664 | -1.0517899 |                           |                |
| DM00045P3 | 0.67067486 | 1.0472507  | 1.1757731  | 1.1366856  | DSIM\GD227\               | XM_002078105.1 |
| DM10387P3 | 0.6708746  | 1.0798215  | 1.1718627  | 1.0660344  |                           |                |
| DM13223P1 | 0.67100525 | 1.6345611  | 1.7418673  | 1.2279758  |                           |                |
| DM05263P4 | 0.67115784 | -1.0611    | -1.0005875 | -1.0831685 |                           |                |
| DM01320P1 | 0.67120254 | -1.1089438 | 1.0019281  | -1.017814  |                           |                |
| DM11982P1 | 0.6712102  | -1.0026823 | -1.280876  | -1.0843295 |                           |                |
| DM03136P4 | 0.67132235 | -1.051129  | 1.0246592  | 1.0524108  | LOC1000239\               | XM_001375347.1 |
| DM14993P3 | 0.6716007  | -1.0098273 | -1.0451775 | 1.2173326  |                           |                |
| DM14735P1 | 0.6719572  | -1.0731622 | 1.0710491  | -1.0228177 | LOC579935                 | XM_001193949.1 |
| DM07363P3 | 0.67215586 | 1.160847   | 1.1609752  | 1.1258347  |                           |                |
| DM09260P1 | 0.6724724  | -1.279085  | 1.0938156  | -1.1227239 |                           |                |
| DM10985P3 | 0.6725453  | 1.2796491  | 1.1298486  | 1.0316259  |                           |                |
| DM07671P3 | 0.67270774 | 1.2712133  | -1.3639898 | -1.0079209 |                           |                |
| DM02476P2 | 0.67285675 | -1.2115906 | -1.0855688 | 1.0294974  | BRAFLDRAFT_XM_002603156.1 |                |
| DM14029P1 | 0.6728916  | -1.0793335 | -1.031432  | 1.0502326  | DVIR\GJ1464               | XM_002051138.1 |
| DM09834P3 | 0.67304707 | 1.1162415  | -1.0951773 | -1.0976014 |                           |                |
| DM14921P3 | 0.6731005  | -1.1949086 | -1.011175  | -1.0058849 |                           |                |
| DM11124P3 | 0.67311233 | 1.0287212  | -1.1664233 | -1.1596296 |                           |                |
| DM13834P2 | 0.67319393 | -1.0183918 | -1.1271898 | -1.0254706 |                           |                |
| DM03203P2 | 0.6732785  | -1.0133135 | -1.1336176 | 1.0396391  |                           |                |
| DM11695P1 | 0.67333883 | -1.0521827 | 1.0288942  | -1.1315376 |                           |                |
| DM00290P3 | 0.6733544  | -1.1336626 | -1.0229381 | -1.018256  | PHYHD1                    | NM_001114066.1 |
| DM00320P3 | 0.6737238  | -1.0590333 | 1.006212   | -1.1008084 | SOX11                     | NM_009234.6    |
| DM14406P2 | 0.6737931  | -1.1807437 | -1.151866  | -1.0011426 |                           |                |
| DM01930P3 | 0.674094   | -1.0327923 | -1.0856878 | -1.0520301 | C1GALTA                   | NM_164840.1    |
| DM10036P3 | 0.67423654 | 1.0029813  | 1.1197462  | 1.1993033  |                           |                |
| DM06907P3 | 0.6742828  | 1.0264633  | 1.1402473  | 1.1332074  |                           |                |
| DM05540P3 | 0.6743696  | -1.1637672 | -1.3476213 | -1.0638089 |                           |                |
| DM12617P1 | 0.67462957 | -1.1236615 | -1.1913869 | 1.0333848  |                           |                |
| DM05757P3 | 0.6747256  | -1.1073887 | -1.0374858 | 1.1035966  |                           |                |
| DM07927P2 | 0.6747741  | 1.0969988  | 1.0088097  | 1.0220069  |                           |                |
| DM03540P2 | 0.6747746  | 1.0438774  | 1.0075978  | -1.0807197 |                           |                |
| DM11287P1 | 0.6751982  | -1.1656712 | -1.1272695 | 1.0218012  |                           |                |
| DM03911P4 | 0.6753356  | -1.3604743 | -1.2665682 | -1.0044458 | CHGG_01905                | XM_001221125.1 |
| DM01325P2 | 0.6760202  | -1.1226537 | -1.0986654 | -1.0656447 |                           |                |
| DM06147P1 | 0.67604697 | -1.0245783 | -1.0762318 | -1.011601  |                           |                |
| DM04260P1 | 0.67619425 | -1.2305197 | 1.2189384  | 1.0866463  |                           |                |
| DM02581P1 | 0.6762609  | -1.0248253 | 1.1921127  | 1.2198745  | DGRI\GH179\               | XM_001995742.1 |
| DM07406P2 | 0.6764193  | 1.1624453  | 1.2740961  | 1.182984   |                           |                |
| DM02411P2 | 0.6764355  | -1.2656693 | -1.0703914 | -1.1911664 | LOC578233                 | XM_001196912.1 |
| DM01060P2 | 0.67645895 | 1.1017468  | 1.0496998  | 1.0465463  | LOC1000126\               | XM_001363602.1 |
| DM14941P2 | 0.6766256  | -1.0740081 | 1.0234185  | -1.1039907 |                           |                |
| DM13300P2 | 0.6768277  | 1.0843452  | 1.2204831  | 1.1579655  |                           |                |
| DM11039P1 | 0.6770078  | -1.0780376 | -1.1040043 | -1.0207317 | LOC656589                 | XM_963110.1    |
| DM13647P4 | 0.67706823 | -1.1817024 | -1.3387362 | -1.1774393 |                           |                |
| DM04477P1 | 0.6771911  | 1.0216137  | -1.2802962 | -1.1830522 |                           |                |
| DM07653P1 | 0.67737836 | -1.1226416 | 1.078882   | 1.2349735  |                           |                |



|           |            |            |            |            |            |                |
|-----------|------------|------------|------------|------------|------------|----------------|
| DM14402P2 | 0.6774566  | -1.1117969 | -1.0082699 | 1.5355264  |            |                |
| DM14792P2 | 0.6775045  | -1.0789244 | -1.128518  | -1.0730729 |            |                |
| DM09240P2 | 0.6775074  | 1.006551   | -1.0573658 | 1.0806255  |            |                |
| DM06438P1 | 0.6775077  | 1.1739722  | -1.0215364 | 1.1846851  | BRAFLDRAFT | XM_002587081.1 |
| DM12900P2 | 0.67752427 | -1.1440622 | -1.3468953 | 1.0772511  |            |                |
| DM00746P1 | 0.6779269  | -1.111202  | -1.0449889 | -1.1132236 | DANA\GF231 | XM_001964430.1 |
| DM05208P1 | 0.6780015  | 1.0503697  | -1.0556313 | 1.0118076  |            |                |
| DM12496P1 | 0.6781418  | -1.0379739 | 1.2845986  | 1.0963514  |            |                |
| DM04840P3 | 0.67819357 | -1.1293824 | 1.0378313  | 1.3815489  | POLR3B     | NM_001160708.1 |
| DM06903P3 | 0.6783462  | -1.062377  | -1.0673648 | -1.0417086 |            |                |
| DM06694P1 | 0.678517   | 1.1271696  | -1.082212  | -1.1492877 |            |                |
| DM02112P3 | 0.67873067 | -1.0628811 | 1.0035883  | 1.0285053  | GM7308     | NM_009790.4    |
| DM07122P1 | 0.67874706 | -1.0331739 | -1.0939652 | -1.0393183 | RPL37A     | XM_001121282.1 |
| DM10013P2 | 0.67881596 | 1.0461371  | 1.1087872  | 1.0906615  |            |                |
| DM09860P3 | 0.6788881  | 1.3122237  | 1.1352682  | -1.0505488 |            |                |
| DM13895P1 | 0.6789657  | -1.0329031 | 1.1689799  | -1.0626069 |            |                |
| DM08707P2 | 0.67911345 | -1.0819464 | -1.0596728 | 1.2374922  |            |                |
| DM02884P2 | 0.67913777 | 1.02958    | 1.2625927  | 1.1771755  | BRAFLDRAFT | XM_002600223.1 |
| DM09721P1 | 0.6794157  | 1.1831918  | 1.1127623  | 1.0675231  |            |                |
| DM03685P4 | 0.6795159  | 1.1412593  | -1.146207  | -1.2291273 |            |                |
| DM06734P1 | 0.6798048  | 1.0642112  | 1.0751857  | 1.170536   |            |                |
| DM10124P2 | 0.6798872  | -1.1228682 | 1.044422   | -1.0024229 |            |                |
| DM01169P4 | 0.68018484 | -1.0658797 | -1.0821384 | -1.0214422 | LOC663894  | XM_969923.1    |
| DM15313P1 | 0.68024486 | -1.0125484 | -1.0048243 | 1.0893945  |            |                |
| DM14617P1 | 0.6803064  | -1.1348834 | -1.1768966 | -1.2180811 |            |                |
| DM02294P4 | 0.68034804 | -1.0880378 | 1.0079961  | -1.1107672 | LOC587315  | XM_001191036.1 |
| DM14228P2 | 0.6804453  | -1.1109749 | 1.0917581  | 1.1163625  |            |                |
| DM08583P2 | 0.68065196 | -1.1263429 | 1.0600107  | -1.002799  |            |                |
| DM10585P1 | 0.68072915 | -1.0904702 | -1.0002234 | -1.0335006 |            |                |
| DM12525P1 | 0.68079245 | 1.2998769  | 1.7480338  | 1.1075646  |            |                |
| DM05541P4 | 0.68083537 | 1.0181949  | -1.3355108 | -1.7043515 |            |                |
| DM11290P1 | 0.6808994  | 1.0683042  | -1.072622  | -1.0224464 |            |                |
| DM14464P2 | 0.6809016  | -1.0500993 | 1.0780438  | -1.0072817 |            |                |
| DM09328P3 | 0.68095946 | -1.0824761 | -1.0260706 | -1.1512897 |            |                |
| DM08624P3 | 0.68105495 | -1.0901471 | -1.0943898 | -1.2386934 |            |                |
| DM14422P3 | 0.6811265  | 1.1227221  | 1.1798538  | 1.0057715  |            |                |
| DM05008P4 | 0.68144834 | -1.1319829 | -1.0993438 | 1.0589406  |            |                |
| DM06453P1 | 0.68164396 | 1.3087546  | 1.0508858  | -1.1783195 |            |                |
| DM10572P2 | 0.68175864 | 1.0807799  | 1.2466542  | 1.2369301  |            |                |
| DM05308P1 | 0.68185693 | -1.117066  | 1.1642972  | 1.1407337  |            |                |
| DM03056P3 | 0.68197465 | -1.106004  | -1.0733652 | 1.0874617  |            |                |
| DM05204P1 | 0.68199104 | 1.0065743  | -1.0360261 | 1.1326907  |            |                |
| DM11538P3 | 0.6820218  | -1.0485216 | 1.0854458  | -1.0192884 |            |                |
| DM15274P3 | 0.68207765 | -1.1460525 | 1.0434625  | -1.0241036 |            |                |
| DM06651P1 | 0.6821934  | -1.0263815 | 1.1287229  | 1.0400925  | DERE\GG105 | XM_001970283.1 |
| DM03239P1 | 0.6823639  | 1.0870749  | 1.014271   | 1.1235625  |            |                |
| DM10418P2 | 0.6823687  | 1.2263234  | 1.2978103  | 1.3608235  |            |                |
| DM14772P3 | 0.68241835 | -1.0953838 | 1.0919672  | -1.0605291 |            |                |
| DM08183P3 | 0.6824345  | 1.1775626  | -1.0160458 | 1.333084   |            |                |
| DM02179P2 | 0.68245757 | -1.0392545 | -1.0610946 | -1.0278382 | CD63       | NM_001087051.1 |

|           |            |            |            |            |                           |
|-----------|------------|------------|------------|------------|---------------------------|
| DM08291P1 | 0.6826791  | 1.0618653  | 1.1108432  | 1.0793748  |                           |
| DM07525P2 | 0.6826821  | -1.1734347 | -1.1197826 | -1.1283939 |                           |
| DM01985P1 | 0.68269897 | -1.0876746 | -1.0764793 | -1.0435461 | DGRI\GH247\XM_001992425.1 |
| DM14670P1 | 0.6827682  | 1.0689847  | -1.0869895 | -1.0607866 |                           |
| DM06026P2 | 0.68280375 | 1.025346   | 1.1510272  | 1.0782087  |                           |
| DM05712P3 | 0.6831485  | 1.2702827  | 1.0964109  | 1.2556164  |                           |
| DM08991P3 | 0.6833336  | 1.0367161  | 1.0785319  | -1.0473692 |                           |
| DM08020P3 | 0.6836126  | -1.1382542 | -1.2534977 | 1.1308497  |                           |
| DM01237P3 | 0.6836844  | 1.1455884  | -1.1786481 | -1.0704482 | DSEC\GM158 XM_002039819.1 |
| DM13823P3 | 0.68386483 | -1.1312215 | 1.0268054  | -1.0188695 |                           |
| DM09921P4 | 0.6839108  | -1.0554858 | 1.1652912  | 1.0400004  |                           |
| DM06912P4 | 0.6840273  | 1.180098   | 1.0811039  | 1.0084116  |                           |
| DM07075P2 | 0.68404794 | 1.1290821  | -1.2404687 | 1.1106429  |                           |
| DM07345P2 | 0.68410856 | 1.1026706  | 1.1103709  | 1.2093089  |                           |
| DM12478P1 | 0.6843052  | 1.1049827  | 1.1073698  | -1.0167874 |                           |
| DM08821P1 | 0.6843146  | -1.0180651 | -1.1287274 | -1.105911  | PBX1 NM_001142077.1       |
| DM04141P1 | 0.6844727  | -1.0966132 | -1.1459316 | -1.0797275 | DYAK\GE247\XM_002096945.1 |
| DM03749P1 | 0.6846228  | 1.1743814  | 1.1760296  | 1.0104102  | SULT1 XM_001858105.1      |
| DM01326P3 | 0.6851755  | -1.0713865 | -1.1389507 | 1.0115427  |                           |
| DM14709P2 | 0.6852426  | 1.0118437  | -1.0278314 | 1.1500005  |                           |
| DM13865P1 | 0.68528336 | -1.3229234 | -1.3227599 | 1.0404911  |                           |
| DM03691P3 | 0.6853199  | -1.1346455 | -1.1823382 | -1.1755418 |                           |
| DM07471P1 | 0.685452   | -1.0314441 | -1.1504192 | -1.0110335 |                           |
| DM00716P3 | 0.68548006 | 1.0462477  | -1.0494468 | 1.0164274  | PHYPADRAFT XM_001753878.1 |
| DM11144P3 | 0.6854835  | -1.0293931 | 1.0880643  | -1.0188607 | LOC1001205\XM_001604092.1 |
| DM06476P3 | 0.68552035 | 1.0289953  | -1.2666665 | 1.2106956  |                           |
| DM14011P2 | 0.6855241  | -1.1244986 | -1.0568547 | 1.0616256  |                           |
| DM14774P1 | 0.68553627 | 1.0062059  | 1.0472627  | -1.1866323 |                           |
| DM08674P1 | 0.68556684 | -1.5206027 | -1.2619433 | -1.1242318 |                           |
| DM03600P3 | 0.68590754 | 1.0331776  | 1.2948639  | 1.1038334  |                           |
| DM05474P1 | 0.6860961  | -1.1012039 | -1.0975282 | -1.0236603 |                           |
| DM01049P3 | 0.6862471  | -1.0785314 | -1.0131621 | -1.1136723 | LOC1001659\XM_001949855.1 |
| DM13862P2 | 0.68628937 | -1.0042704 | -1.054908  | -1.1591376 | DPSE\GA182\XM_001359873.2 |
| DM07889P1 | 0.6869168  | 1.0185534  | 1.0547299  | 1.165689   |                           |
| DM00073P2 | 0.6869293  | 1.0063138  | -1.076669  | -1.0071541 | LOC1001630\XM_001943961.1 |
| DM11357P2 | 0.68708676 | -1.3279078 | -1.15763   | -1.246732  |                           |
| DM01514P3 | 0.68716913 | 1.0862678  | 1.0777162  | 1.0010202  | ISCW_ISCWC XM_002414286.1 |
| DM01354P3 | 0.6872473  | -1.0593429 | -1.0918131 | -1.0673711 | LOC1001994\XM_002154593.1 |
| DM14622P1 | 0.68725777 | 1.0161569  | 1.024929   | 1.1221503  |                           |
| DM04594P2 | 0.687309   | 1.1722565  | 1.1442058  | 1.2297301  | FG00811.1 XM_380987.1     |
| DM10320P2 | 0.6875828  | -1.2348722 | 1.2228891  | 1.022555   |                           |
| DM05512P3 | 0.68776995 | -1.0192282 | -1.0067658 | 1.1151084  |                           |
| DM00844P3 | 0.687807   | 1.0007615  | -1.1715454 | -1.1325043 |                           |
| DM02560P2 | 0.6879131  | -1.0405141 | 1.1218956  | 1.2424892  | CP37 NM_001172246.1       |
| DM06455P4 | 0.68800944 | -1.1023341 | -1.0693247 | 1.0325674  |                           |
| DM13416P2 | 0.6881787  | 1.2886004  | -1.3309258 | 1.2768198  |                           |
| DM12527P3 | 0.68840826 | -1.0797977 | -1.0168481 | 1.1651915  |                           |
| DM15078P1 | 0.68844736 | -1.1437098 | 1.11464    | -1.3218647 | DSEC\GM177 XM_002043908.1 |
| DM04545P2 | 0.68851036 | -1.0987836 | -1.0895817 | -1.1112981 |                           |
| DM10188P1 | 0.6886032  | -1.1740661 | -1.1298839 | -1.3853668 |                           |

|           |            |            |            |            |                           |
|-----------|------------|------------|------------|------------|---------------------------|
| DM13403P2 | 0.68868196 | 1.1095756  | 1.2480454  | 1.0976185  |                           |
| DM11668P3 | 0.68871903 | 1.0137814  | -1.111322  | 1.010673   |                           |
| DM05981P2 | 0.68877655 | 1.1747369  | -1.1422901 | 1.1962954  | LOC1002257!XM_002200585.1 |
| DM07655P1 | 0.6888343  | 1.0557278  | -1.0193498 | -1.2294538 |                           |
| DM06403P3 | 0.68884975 | 1.0639777  | 1.1473109  | 1.3219703  |                           |
| DM05633P2 | 0.6888535  | -1.0070374 | -1.104681  | -1.069399  |                           |
| DM02733P2 | 0.68895113 | 1.062793   | 1.1580253  | 1.1101887  | DYAK\GE161!XM_002100433.1 |
| DM12029P1 | 0.6890926  | 1.1538292  | 1.0111704  | -1.0445884 |                           |
| DM03958P1 | 0.6890931  | -1.0200974 | -1.4731089 | 1.1073215  | BRAFLDRAFT_XM_002609359.1 |
| DM14999P2 | 0.6892303  | -1.1385572 | 1.0676017  | 1.0745693  |                           |
| DM01336P1 | 0.6892478  | -1.0199467 | -1.2597649 | 1.0289111  | DWIL\GK138!XM_002072963.1 |
| DM03318P2 | 0.6893566  | 1.0150738  | -1.1109967 | -1.1704326 |                           |
| DM06586P2 | 0.6893778  | -1.132629  | -1.0457855 | -1.2662652 | MLT-11 NM_075592.3        |
| DM03955P2 | 0.6894717  | -1.2436157 | 1.1326313  | -1.2969254 |                           |
| DM00550P1 | 0.68989074 | -1.0417182 | 1.0005767  | 1.0364065  | BRAFLDRAFT_XM_002599258.1 |
| DM03142P1 | 0.6899119  | -1.249781  | -1.2118348 | -1.2452128 |                           |
| DM09520P2 | 0.6901237  | 1.013572   | -1.0880566 | -1.1059295 |                           |
| DM11134P3 | 0.69012743 | 1.0444847  | 1.2638254  | 1.1691091  |                           |
| DM04423P2 | 0.6901668  | 1.0382086  | -1.0300779 | -1.0538622 |                           |
| DM06084P1 | 0.69025725 | -1.1495985 | -1.028771  | -1.0718791 | DGRI\GH228!XM_001994985.1 |
| DM02801P1 | 0.6906353  | -1.0832251 | -1.0860236 | -1.1068476 | DGRI\GH150!XM_001984286.1 |
| DM14623P1 | 0.69071007 | -1.1824901 | -1.4086798 | -1.149756  |                           |
| DM07833P1 | 0.6909092  | 1.0030317  | 1.2355738  | 1.0481589  |                           |
| DM00441P2 | 0.69097054 | -1.0186963 | -1.1075261 | -1.0768379 |                           |
| DM05848P3 | 0.69104856 | 1.0118091  | 1.0056123  | 1.0472963  | LOC1002146!XM_002161922.1 |
| DM02094P1 | 0.6911562  | -1.039108  | -1.0476924 | 1.0689859  | DSEC\GM242 XM_002031070.1 |
| DM01182P1 | 0.6912318  | -1.1016979 | -1.0321374 | -1.0331151 | CPD XM_001870172.1        |
| DM09579P2 | 0.69135165 | 1.0292253  | 1.0673835  | -1.0788385 |                           |
| DM03839P1 | 0.6918247  | 1.1637416  | 1.1946607  | 1.0638225  |                           |
| DM03724P1 | 0.6919084  | -1.0017684 | 1.0856642  | -1.138073  | LOC579365 XM_001187572.1  |
| DM09202P3 | 0.6922743  | -1.1433548 | -1.0148396 | -1.0084404 |                           |
| DM04313P1 | 0.6922817  | 1.2486819  | -1.0661962 | 1.2474262  |                           |
| DM04152P3 | 0.69238275 | 1.0001116  | -1.0151998 | -1.052174  |                           |
| DM05439P2 | 0.69245183 | -1.0627289 | 1.0828042  | 1.0551802  |                           |
| DM14066P1 | 0.69253516 | 1.0608991  | 1.1414713  | 1.1135648  | DMO\GI224!XM_002000628.1  |
| DM01927P3 | 0.6925576  | 1.3078998  | 1.2321762  | 1.2004085  | LOC1000276!XM_001370957.1 |
| DM14188P2 | 0.6925945  | -1.0531834 | -1.0097935 | 1.1686413  |                           |
| DM02582P1 | 0.692612   | 1.3267243  | 1.7371478  | 1.297658   |                           |
| DM04883P4 | 0.6927771  | 1.033997   | 1.0396006  | 1.1050618  |                           |
| DM10832P4 | 0.6929874  | -1.0077566 | -1.1259103 | -1.1023161 |                           |
| DM13380P2 | 0.69314057 | -1.0175436 | -1.0057384 | -1.1547588 |                           |
| DM06003P3 | 0.6932127  | -1.0856912 | 1.142446   | -1.0771872 |                           |
| DM14307P2 | 0.693308   | -1.0539718 | 1.094561   | 1.0402999  |                           |
| DM10530P2 | 0.6934816  | -1.0855207 | 1.2185649  | 1.1545274  |                           |
| DM09422P2 | 0.6936536  | -1.3676739 | -1.1918994 | -1.4319199 |                           |
| DM10402P4 | 0.6937499  | -1.0755633 | 1.1081442  | -1.0528934 | LOC661679 XM_967827.2     |
| DM12405P3 | 0.69384146 | -1.081285  | 1.0898348  | 1.0325768  |                           |
| DM06662P3 | 0.6939366  | -1.0619892 | 1.013948   | 1.2437671  |                           |
| DM02133P2 | 0.69394606 | -1.0121264 | 1.1007038  | -1.0428394 | SS1G_07775 XM_001591100.1 |
| DM05550P1 | 0.6940706  | -1.1040947 | 1.0431116  | 1.0307572  |                           |

|           |            |            |            |            |              |                |
|-----------|------------|------------|------------|------------|--------------|----------------|
| DM00391P4 | 0.69407755 | 1.0232968  | 1.0934213  | 1.0670145  | SDCCAG1      | NM_025441.2    |
| DM08767P1 | 0.6941727  | -1.0644149 | 1.1607231  | -1.0301498 | TBL1XR1      | NM_001017274.2 |
| DM05530P1 | 0.6942603  | -1.0231793 | 1.280276   | -1.1894593 |              |                |
| DM08513P1 | 0.69449043 | -1.1452112 | -1.0964556 | -1.0174367 |              |                |
| DM04863P3 | 0.6948147  | -1.132873  | -1.1888597 | -1.0113357 |              |                |
| DM13203P1 | 0.6948966  | -1.1533531 | -1.0213714 | 1.0239506  |              |                |
| DM06865P3 | 0.6949707  | -1.0251526 | -1.0405685 | 1.0578457  |              |                |
| DM04654P2 | 0.6950134  | 1.0318809  | 1.244021   | 1.1998416  | POPTRDRAFT   | XM_002326694.1 |
| DM03739P1 | 0.6950808  | -1.1192292 | 1.0017793  | -1.0518029 | TMEM184C     | NM_001091995.1 |
| DM05303P1 | 0.6951932  | 1.209077   | 1.1281108  | 1.1759416  |              |                |
| DM01338P4 | 0.6952132  | 1.0174235  | 1.0089138  | 1.1182387  | LOC1001625   | XM_001944882.1 |
| DM02350P1 | 0.6953093  | 1.0144905  | 1.0072191  | 1.0267743  | DNAJC28      | NM_001015977.1 |
| DM05206P1 | 0.69533277 | 1.0912926  | 1.017096   | -1.1413122 |              |                |
| DM04049P2 | 0.6955046  | -1.2501391 | -1.1491625 | -1.3516109 |              |                |
| DM02672P1 | 0.69576657 | -1.1601524 | -1.0221939 | -1.1144257 | LOC577484    | XR_026520.1    |
| DM11317P4 | 0.69594866 | 1.1181035  | -1.0214438 | 1.0177265  |              |                |
| DM01830P1 | 0.69623315 | -1.303143  | -1.1892068 | -1.2554587 | AGAP_AGAP0   | XM_309221.3    |
| DM09703P1 | 0.69633806 | 1.0922656  | 1.2810739  | 1.2924161  |              |                |
| DM13222P1 | 0.6964155  | -1.0723197 | -1.2026469 | -1.1037182 |              |                |
| DM09126P3 | 0.69646347 | 1.0297445  | 1.082788   | 1.1297375  |              |                |
| DM10093P1 | 0.6965184  | 1.0128378  | -1.0786442 | 1.0166821  |              |                |
| DM08113P2 | 0.69653344 | 1.1080933  | 1.1367229  | 1.1094873  |              |                |
| DM04473P3 | 0.6966014  | -1.0423404 | -1.1183833 | -1.1346813 |              |                |
| DM07281P1 | 0.69679    | -1.0323728 | 1.1244404  | 1.0602549  |              |                |
| DM09352P2 | 0.69682896 | -1.0312356 | -1.0370215 | 1.109126   | PKA-R1       | NM_001014595.2 |
| DM14340P2 | 0.69713783 | 1.0190598  | -1.2898164 | -1.108701  |              |                |
| DM05171P1 | 0.6972623  | 1.0557381  | -1.0559877 | -1.0561932 |              |                |
| DM12955P1 | 0.69773084 | 1.1969074  | 1.1306783  | 1.1549124  |              |                |
| DM05423P4 | 0.6980948  | -1.0706787 | -1.26243   | -1.0595297 |              |                |
| DM02148P4 | 0.6981183  | -1.098497  | -1.0168525 | 1.036394   | DPER\GL231   | XM_002013793.1 |
| DM11047P3 | 0.6985071  | 1.049655   | -1.1313082 | 1.1054022  |              |                |
| DM01494P2 | 0.69858706 | 1.0856291  | 1.1260233  | -1.0125583 | NEMVEDRAFT   | XM_001633859.1 |
| DM03813P3 | 0.6985933  | -1.212745  | 1.2115271  | -1.1455506 |              |                |
| DM01264P2 | 0.69863707 | -1.0215807 | 1.0373232  | -1.0491949 |              |                |
| DM03883P1 | 0.69873583 | 1.0963037  | 1.1199379  | 1.0390456  | AAEL_AAEL01  | XM_001655005.1 |
| DM02846P4 | 0.69890565 | -1.0618167 | 1.115098   | 1.3335689  |              |                |
| DM07483P2 | 0.69892764 | -1.0754535 | -1.0539036 | 1.1230066  |              |                |
| DM00866P3 | 0.69905216 | -1.018874  | 1.0013797  | -1.0750234 | EP400        | XM_001659262.1 |
| DM01706P1 | 0.69920594 | -1.1659423 | 1.2159964  | -1.1179081 | DWIL\GK172   | XM_002061928.1 |
| DM13440P1 | 0.699209   | -1.1274527 | -1.1374134 | -1.068805  |              |                |
| DM03297P3 | 0.6992485  | 1.1056075  | -1.3174558 | -1.010694  | CPIPJ_CPIJOC | XM_001849399.1 |
| DM12119P3 | 0.699277   | 1.0422814  | -1.0938834 | -1.1256671 |              |                |
| DM07806P1 | 0.6993688  | 1.0265174  | 1.0398377  | -1.0631529 |              |                |
| DM12511P3 | 0.69943327 | 1.0347006  | -1.2730774 | -1.3192741 |              |                |
| DM05846P2 | 0.6996239  | 1.1035607  | -1.1439382 | -1.1293645 |              |                |
| DM01431P1 | 0.69984174 | 1.0137683  | 1.3758647  | -1.045909  | SP33         | XM_393316.3    |
| DM07421P1 | 0.6999941  | 1.1157585  | 1.5191635  | 1.1283965  |              |                |
| DM05612P2 | 0.7002548  | -1.2631882 | -1.0135262 | -1.0065899 |              |                |
| DM04931P1 | 0.7002685  | -1.2201798 | -1.2484494 | -1.384673  |              |                |
| DM01716P4 | 0.7002998  | -1.003524  | 1.0258667  | 1.0120751  | AAEL_AAEL0C  | XM_001651978.1 |

|           |            |            |            |            |             |                |
|-----------|------------|------------|------------|------------|-------------|----------------|
| DM03559P3 | 0.70031404 | -1.0523258 | 1.0352141  | -1.0805849 | LOC551451   | XM_623843.2    |
| DM08693P2 | 0.7003921  | -1.0658404 | -1.0289513 | 1.038363   |             |                |
| DM08127P2 | 0.70047545 | 1.0914012  | 1.1553249  | 1.0986388  |             |                |
| DM04606P3 | 0.7009852  | -1.0683424 | -1.0782603 | -1.0112797 |             |                |
| DM03476P1 | 0.70100015 | -1.0682725 | -1.0443538 | -1.0473648 | RPL18A      | XM_001855114.1 |
| DM14055P1 | 0.7011506  | 1.0123752  | -1.1436409 | 1.105609   |             |                |
| DM13412P2 | 0.70118487 | -1.2878344 | -1.0378343 | -1.2350368 |             |                |
| DM15331P3 | 0.7012307  | -1.1303724 | -1.10827   | -1.0012585 |             |                |
| DM04719P3 | 0.70154256 | 1.005168   | -1.115519  | -1.0425653 |             |                |
| DM14931P2 | 0.7015708  | 1.1662378  | 1.1627207  | 1.1278963  |             |                |
| DM02772P1 | 0.7015801  | -1.166254  | -1.0885857 | 1.0094384  |             |                |
| DM02698P3 | 0.7016014  | 1.0400517  | 1.0895023  | -1.0105708 |             |                |
| DM02022P2 | 0.7016599  | 1.1403127  | -1.0700054 | -1.0715919 | DSEC\GM150  | XM_002044256.1 |
| DM10750P3 | 0.70170873 | -1.091554  | -1.0006629 | -1.2691343 |             |                |
| DM04287P1 | 0.7018457  | 1.2673957  | 1.3679942  | -1.1381433 |             |                |
| DM06047P1 | 0.70195407 | 1.2138746  | 1.415222   | -1.0148695 |             |                |
| DM05446P1 | 0.7020039  | 1.0044988  | 1.0015446  | -1.0655022 |             |                |
| DM03195P1 | 0.7020162  | 1.1009619  | 1.2946132  | -1.0328355 | TTHERM_004  | XM_001033068.1 |
| DM15146P1 | 0.70206124 | 1.1098274  | 1.3447028  | 1.2294401  |             |                |
| DM06235P4 | 0.70236164 | 1.0113168  | 1.1024019  | -1.027241  |             |                |
| DM13201P2 | 0.7025492  | 1.0690339  | -1.0199175 | 1.2818927  |             |                |
| DM00967P4 | 0.70266366 | 1.0810504  | 1.0310187  | 1.0887271  | DYAK\GE108  | XM_002099376.1 |
| DM14397P1 | 0.70294887 | -1.1336604 | -1.2451209 | -1.005112  |             |                |
| DM10278P1 | 0.7031064  | 1.1277537  | 1.19756    | -1.0367798 |             |                |
| DM13023P1 | 0.70319384 | 1.1448386  | -1.0919787 | -1.0976677 |             |                |
| DM12943P1 | 0.70321536 | 1.1593033  | -1.124265  | 1.0058963  |             |                |
| DM10134P3 | 0.70323086 | -1.0815759 | 1.1307199  | 1.146176   |             |                |
| DM05557P3 | 0.7032424  | -1.2820343 | 1.0045482  | -1.1026198 |             |                |
| DM02087P1 | 0.70330054 | -1.0533406 | -1.230507  | -1.1338168 | ACAC        | XM_001651829.1 |
| DM12078P4 | 0.703542   | -1.0935032 | -1.0178586 | 1.0047168  |             |                |
| DM12080P1 | 0.7035768  | -1.0711292 | -1.0370262 | -1.2925383 |             |                |
| DM15213P1 | 0.70378673 | 1.5917782  | -1.1488237 | 1.0968722  |             |                |
| DM12052P3 | 0.70401144 | 1.0013397  | 1.1273905  | 1.1582761  |             |                |
| DM02076P2 | 0.7041329  | -1.1489521 | -1.0992527 | 1.0316889  | LOC1000808  | XM_001511655.1 |
| DM13572P3 | 0.70446545 | -1.0591581 | 1.0093393  | 1.0623244  |             |                |
| DM15026P1 | 0.7045356  | -1.0270095 | 1.0489289  | 1.0956584  |             |                |
| DM01621P4 | 0.70457894 | -1.0474828 | -1.0682083 | -1.0389361 | LOC408516   | XM_392060.3    |
| DM02036P2 | 0.7046235  | 1.0468214  | 1.0692672  | 1.0769329  | DSIM\GD164  | XM_002105785.1 |
| DM10199P2 | 0.70462954 | -1.0346416 | -1.1425937 | 1.0193876  |             |                |
| DM06327P1 | 0.704696   | -1.030609  | -1.1448774 | -1.0363333 | PB103351.00 | XM_666562.1    |
| DM14693P2 | 0.7047057  | 1.253481   | 1.1355207  | 1.199856   |             |                |
| DM14209P1 | 0.7048037  | -1.0127172 | -1.1077176 | -1.0242647 |             |                |
| DM03551P3 | 0.70504504 | 1.1000274  | 1.3036313  | -1.0918376 |             |                |
| DM14923P3 | 0.7052992  | 1.1215928  | 1.031283   | 1.0791692  |             |                |
| DM02084P2 | 0.70539945 | 1.0893201  | 1.0580406  | 1.0073864  | LOC552756   | XM_625132.2    |
| DM02026P3 | 0.7054486  | -1.039075  | -1.095825  | -1.0413042 | FK506-BP1   | XM_001121759.1 |
| DM09079P3 | 0.70556015 | 1.067522   | 1.1036739  | -1.0016115 |             |                |
| DM07318P1 | 0.70573485 | 1.0026834  | -1.1014737 | -1.1288092 |             |                |
| DM07184P1 | 0.70585847 | -1.1592834 | -1.2116632 | -1.3430183 |             |                |
| DM07304P2 | 0.7060237  | -1.001701  | 1.2871944  | 1.2449282  |             |                |

|           |            |            |            |            |             |                |
|-----------|------------|------------|------------|------------|-------------|----------------|
| DM15269P3 | 0.70650357 | -1.2030299 | -1.1654902 | 1.0638981  |             |                |
| DM13093P1 | 0.70664126 | -1.1673485 | -1.2349807 | -1.2948467 |             |                |
| DM09893P1 | 0.70673126 | 1.0759091  | -1.2539914 | -1.2736572 |             |                |
| DM12556P2 | 0.70675683 | 1.007295   | 1.1389563  | 1.1132512  |             |                |
| DM07507P2 | 0.7068394  | 1.1157293  | 1.0531346  | -1.0919037 |             |                |
| DM06202P2 | 0.7075145  | 1.0102087  | -1.0475612 | -1.1168966 | LOC658784   | XM_965143.1    |
| DM06854P1 | 0.7075853  | -1.0911463 | -1.2489856 | -1.0761392 |             |                |
| DM04629P3 | 0.70767784 | -1.0308784 | 1.0472636  | 1.059628   | NSA2        | XM_517704.2    |
| DM13935P3 | 0.7076951  | -1.0489702 | 1.115143   | -1.0475461 |             |                |
| DM14274P2 | 0.7077561  | 1.1711544  | 1.1617556  | 1.1244193  |             |                |
| DM13668P2 | 0.70821273 | 1.0659782  | 1.1911274  | 1.0432246  |             |                |
| DM04996P3 | 0.7082679  | 1.0206128  | 1.0743213  | 1.121779   |             |                |
| DM06644P3 | 0.7083467  | 1.0435172  | -1.0029981 | 1.0836366  |             |                |
| DM02614P1 | 0.708415   | -1.1292232 | -1.1687622 | -1.2132275 | RPL19       | NM_001043756.4 |
| DM01700P3 | 0.7085986  | -1.0120687 | 1.0189017  | 1.0356437  | UPRT        | NM_145052.3    |
| DM09386P1 | 0.7086195  | -1.0742344 | -1.4710559 | -1.370052  |             |                |
| DM06151P3 | 0.708824   | 1.0972418  | -1.2041303 | 1.2778693  |             |                |
| DM04362P4 | 0.7089146  | 1.1126288  | 1.0954448  | 1.114065   |             |                |
| DM06297P3 | 0.709094   | -1.0333878 | -1.0847155 | -1.1539758 | KANSL2      | NM_133714.4    |
| DM03762P4 | 0.70916706 | -1.1240873 | -1.0966184 | -1.0083063 | MAN2B1      | NM_199404.1    |
| DM08920P1 | 0.70923156 | 1.109923   | -1.1114476 | -1.0094413 |             |                |
| DM09483P2 | 0.7095222  | -1.0012887 | -1.2930701 | -1.2326696 |             |                |
| DM02278P2 | 0.70952946 | 1.0038031  | 1.0266583  | 1.0187218  | LOC1002190  | XM_002186862.1 |
| DM01676P1 | 0.7096693  | 1.0026405  | -1.0120282 | -1.0133971 | RPS11       | NM_013725.4    |
| DM08431P3 | 0.7096997  | 1.123803   | 1.0297337  | 1.0280582  |             |                |
| DM00726P3 | 0.709778   | 1.1395241  | 1.0829353  | -1.0338079 | DVIR\GJ1354 | XM_002047589.1 |
| DM13385P3 | 0.7098458  | -1.1368836 | -1.0804223 | -1.0031966 | LOC1002007  | XM_002161599.1 |
| DM07768P3 | 0.7100298  | 1.0098412  | -1.0033087 | -1.1260747 |             |                |
| DM05745P1 | 0.71014124 | 1.2950346  | 1.0917599  | 1.0046165  |             |                |
| DM00932P3 | 0.7101651  | 1.2861987  | 1.2058493  | 1.2529551  | DGRI\GH171  | XM_001985612.1 |
| DM08286P3 | 0.7102208  | -1.1972008 | -1.1046486 | -1.0916657 |             |                |
| DM14383P4 | 0.71025723 | 1.0071905  | -1.0274024 | -1.0874873 | DWIL\GK220  | XM_002066141.1 |
| DM04671P3 | 0.7103961  | 1.1202424  | 1.2271398  | 1.1265929  |             |                |
| DM01659P1 | 0.71045434 | -1.0736467 | -1.0877328 | 1.0804825  | LOC1001177  | XM_001604061.1 |
| DM08035P3 | 0.7105929  | -1.1314068 | 1.0226873  | -1.0518031 | CHMP4B      | NM_001094821.1 |
| DM08892P2 | 0.7106828  | -1.2094398 | 1.0544238  | 1.0306852  |             |                |
| DM09095P2 | 0.71075016 | -1.0326377 | 1.0871965  | 1.0754207  |             |                |
| DM04612P2 | 0.7107961  | 1.1772488  | 1.3332589  | 1.2575393  | CSD1        | XM_001422393.1 |
| DM05040P2 | 0.7108222  | -1.0845827 | -1.1638242 | -1.009996  | CG17012     | NM_134818.2    |
| DM07886P2 | 0.71104497 | -1.5715171 | -1.2834742 | -1.0737168 |             |                |
| DM08799P1 | 0.7111773  | 1.0390882  | -1.0882819 | 1.0039988  |             |                |
| DM01810P4 | 0.7111793  | 1.0777094  | 1.0121684  | -1.1246107 | LOC412885   | XM_396337.2    |
| DM04986P1 | 0.71128005 | 1.0515758  | 1.13173    | 1.1308119  | DGRI\GH217  | XM_001987043.1 |
| DM09234P1 | 0.71130514 | -1.0343398 | 1.1275684  | 1.1634041  |             |                |
| DM06017P2 | 0.7113225  | -1.0021205 | -1.0496033 | 1.0552995  |             |                |
| DM09418P3 | 0.7113918  | -1.0314134 | -1.0050619 | 1.0581871  |             |                |
| DM01310P1 | 0.7114069  | 1.0917157  | 1.0435123  | 1.0806445  | EXOC1       | XM_001659759.1 |
| DM03217P3 | 0.7116078  | -1.0642334 | 1.0691137  | 1.1346452  |             |                |
| DM09787P1 | 0.71168995 | 1.1366395  | -1.167808  | 1.0699754  |             |                |
| DM03295P3 | 0.7122411  | -1.0650369 | 1.0051291  | -1.0020971 | DYAK\GE141  | XM_002092311.1 |

|           |            |            |            |            |                           |                |
|-----------|------------|------------|------------|------------|---------------------------|----------------|
| DM11288P2 | 0.7122828  | 1.0467117  | 1.0559523  | -1.0118493 |                           |                |
| DM01804P1 | 0.7125062  | 1.077896   | -1.0597789 | -1.0807662 |                           |                |
| DM07404P2 | 0.71265614 | -1.1688038 | 1.0214108  | 1.0293995  |                           |                |
| DM05272P1 | 0.7127642  | -1.1246593 | -1.064696  | 1.0125977  |                           |                |
| DM01321P2 | 0.7127783  | -1.0429058 | 1.1488463  | 1.1678516  | BRAFLDRAFT_XM_002600910.1 |                |
| DM13864P3 | 0.7129353  | 1.0408453  | 1.1253026  | 1.2020798  |                           |                |
| DM06347P3 | 0.7131336  | 1.661997   | 2.1418898  | 1.2986205  |                           |                |
| DM09380P3 | 0.7132261  | 1.1137716  | 1.1117067  | 1.1423073  |                           |                |
| DM03143P2 | 0.7132422  | 1.0700475  | 1.0009135  | 1.4259868  |                           |                |
| DM14500P2 | 0.713307   | -1.2408476 | -1.1469057 | -1.1704721 |                           |                |
| DM07907P1 | 0.71333593 | 1.1008737  | -1.1958531 | 1.1924664  |                           |                |
| DM13517P1 | 0.71348995 | -1.1061416 | 1.1068567  | 1.0327215  |                           |                |
| DM08089P3 | 0.71351135 | 1.0481474  | 1.0585799  | 1.044619   |                           |                |
| DM05858P1 | 0.71367145 | -1.0695127 | -1.093586  | -1.0342573 |                           |                |
| DM11700P3 | 0.7137222  | 1.0078696  | 1.0613729  | -1.0416299 |                           |                |
| DM09448P3 | 0.7137903  | -1.1269101 | -1.0347506 | -1.0029407 | CDKAL1                    | NM_001091487.1 |
| DM10629P1 | 0.71382403 | -1.3251975 | -1.0169467 | 1.1080197  |                           |                |
| DM08123P3 | 0.71390545 | -1.2976235 | -1.1834388 | -1.1992471 |                           |                |
| DM11934P2 | 0.7139532  | -1.1298949 | 1.002019   | 1.175269   |                           |                |
| DM07505P1 | 0.71399444 | 1.2029477  | 1.3033214  | -1.014738  |                           |                |
| DM14529P4 | 0.7140238  | -1.184927  | -1.4300845 | -1.2427431 |                           |                |
| DM10363P2 | 0.7140839  | -1.0547103 | -1.0237389 | 1.0232869  |                           |                |
| DM07097P4 | 0.71411633 | -1.1187866 | -1.1008666 | 1.0145484  |                           |                |
| DM10317P1 | 0.7143293  | -1.0055796 | 1.1641108  | 1.097245   |                           |                |
| DM00956P3 | 0.7143333  | 1.0052971  | 1.0909826  | -1.0438685 | METTL5                    | NM_001114181.1 |
| DM09288P4 | 0.7145407  | -1.2408577 | -1.1577694 | -1.3368806 |                           |                |
| DM09349P2 | 0.71468276 | -1.0381569 | -1.0988245 | -1.1394818 |                           |                |
| DM07970P2 | 0.71475893 | 1.2657471  | 1.072853   | 1.2821156  |                           |                |
| DM06352P1 | 0.71491885 | -1.1488707 | -1.0761886 | 1.0488805  |                           |                |
| DM05475P1 | 0.71499527 | -1.0322238 | 1.053985   | 1.0758739  |                           |                |
| DM15041P4 | 0.71553695 | -1.0126953 | -1.1559331 | -1.1204406 |                           |                |
| DM11586P2 | 0.71555054 | -1.0388339 | 1.0506815  | 1.011129   |                           |                |
| DM02914P1 | 0.7160045  | -1.1637295 | -1.5813975 | -1.652588  | LOC664385                 | XM_970392.1    |
| DM08980P2 | 0.7160166  | -1.2528912 | 1.0832627  | 1.0036325  |                           |                |
| DM01642P3 | 0.71605456 | 1.0481988  | -1.128237  | -1.0493441 | OAT                       | NM_016978.2    |
| DM06014P3 | 0.71617305 | -1.0903171 | 1.004652   | -1.021438  | LOC550824                 | XM_623214.2    |
| DM07931P4 | 0.716204   | 1.1751875  | 1.1577517  | 1.0221223  |                           |                |
| DM07628P3 | 0.7162176  | 1.1353705  | 1.1927006  | 1.1448184  |                           |                |
| DM06757P2 | 0.71625733 | 1.2073928  | 1.0062635  | 1.5566347  |                           |                |
| DM08239P3 | 0.71632475 | -1.0248888 | 1.180113   | -1.1009362 |                           |                |
| DM04541P3 | 0.7164349  | 1.0849776  | 1.0017049  | 1.075139   | DYAK\GE256(XM_002096289.1 |                |
| DM13197P1 | 0.7165448  | 1.0557874  | -1.024731  | 1.0278121  |                           |                |
| DM00762P2 | 0.71661377 | -1.2318522 | -1.1699411 | -1.1060241 | MGC154819                 | NM_001096967.1 |
| DM10324P1 | 0.71665776 | -1.2976961 | 1.1253624  | -1.00728   |                           |                |
| DM01192P2 | 0.7167632  | 1.0262836  | -1.0646443 | -1.1469444 | LOC579905                 | XM_779997.2    |
| DM06788P1 | 0.7167889  | -1.0249274 | -1.0856029 | 1.0130017  |                           |                |
| DM10030P1 | 0.71684295 | -1.0716517 | 1.0098767  | -1.0901536 |                           |                |
| DM14361P2 | 0.71684295 | -1.0233614 | 1.1392591  | 1.2257789  |                           |                |
| DM14777P1 | 0.7169003  | 1.1456195  | 1.1870168  | 1.1914402  | BRAFLDRAFT_XM_002613404.1 |                |
| DM02311P2 | 0.7171112  | -1.2203007 | 1.061699   | 1.0269203  | LOC692914                 | NM_001046757.1 |

|           |            |            |            |            |            |                |
|-----------|------------|------------|------------|------------|------------|----------------|
| DM15232P1 | 0.71739626 | -1.2509017 | 1.1196513  | 1.2086092  |            |                |
| DM04144P3 | 0.71750647 | -1.0016288 | 1.0823598  | -1.143373  |            |                |
| DM14471P1 | 0.717782   | -1.0618778 | 1.0764827  | 1.0398945  |            |                |
| DM04604P2 | 0.7179008  | -1.0012767 | -1.0168048 | 1.0435627  | DWIL\GK140 | XM_002073271.1 |
| DM09078P4 | 0.71800375 | -1.0084481 | -1.0044786 | -1.1327394 |            |                |
| DM15064P3 | 0.7181731  | -1.0599968 | -1.3687192 | -1.0653442 | LOC469018  | XM_001139228.1 |
| DM09959P1 | 0.7182081  | -1.2367934 | 1.039939   | -1.0338937 |            |                |
| DM13571P4 | 0.7183659  | 1.1517316  | 1.2532096  | 1.1043165  |            |                |
| DM07711P4 | 0.71845025 | -1.2023108 | -1.0814538 | -1.199527  |            |                |
| DM15221P3 | 0.7185738  | -1.0609763 | 1.1075824  | 1.0389167  | AGXT2L1    | NM_001102865.1 |
| DM04067P2 | 0.7186405  | -1.0189365 | 1.069651   | 1.7404206  |            |                |
| DM06181P1 | 0.71873367 | -1.0746809 | -1.0880233 | -1.1423305 | UBA1       | NM_001014080.1 |
| DM09547P2 | 0.7187918  | -1.1585356 | 1.2288818  | 1.0472558  |            |                |
| DM10804P1 | 0.7189343  | -1.2343152 | -1.1689197 | -1.2300462 |            |                |
| DM00212P2 | 0.71893555 | -1.1074545 | -1.0936203 | -1.1272756 | DSEC\GM180 | XM_002037797.1 |
| DM06923P2 | 0.71904683 | -1.091896  | -1.0610535 | 1.1118901  |            |                |
| DM09469P2 | 0.7191415  | 1.0644325  | -1.085031  | -1.0213714 |            |                |
| DM12725P1 | 0.7195048  | -1.1108674 | -1.2278668 | 1.0302106  |            |                |
| DM00297P2 | 0.71951836 | -1.1041377 | -1.1132172 | 1.0348524  | LOC1001625 | XM_001944882.1 |
| DM14124P2 | 0.71979356 | 1.0417113  | 1.1046022  | 1.20442    |            |                |
| DM14632P2 | 0.7198205  | -1.0246884 | -1.1142168 | -1.0643951 |            |                |
| DM14904P3 | 0.71982706 | 1.0227023  | 1.2435806  | 1.1242399  | MOCS2      | XM_397469.3    |
| DM07259P3 | 0.71986157 | 1.0455794  | 1.1669127  | 1.2178546  |            |                |
| DM15025P3 | 0.7200326  | -1.0075315 | -1.171962  | -1.2440501 |            |                |
| DM05307P1 | 0.72003454 | 1.0083575  | -1.0038193 | -1.1393731 |            |                |
| DM13707P1 | 0.7201086  | -1.0813059 | 1.0073144  | -1.0574753 |            |                |
| DM12906P1 | 0.7202552  | -1.4060713 | -1.1416507 | 1.0412291  |            |                |
| DM13191P1 | 0.72031134 | -1.0157465 | 1.0121957  | 1.0267117  |            |                |
| DM00448P1 | 0.7203597  | 1.083711   | 1.0897417  | 1.0158254  | DNAJA2     | NM_213493.1    |
| DM02387P4 | 0.72043246 | -1.0180813 | -1.0825068 | -1.0085883 | BRAFLDRAFT | XM_002610200.1 |
| DM01038P2 | 0.7209125  | -1.0157557 | -1.0890528 | -1.0038489 | EHI_008200 | XM_645264.2    |
| DM15248P3 | 0.7209173  | 1.1474744  | 1.012467   | 1.2036747  | LOC1000156 | XM_001365698.1 |
| DM05023P3 | 0.7210888  | -1.0985022 | -1.1729306 | -1.144595  |            |                |
| DM07542P1 | 0.7211118  | 1.1667572  | 1.0796845  | 1.1087033  |            |                |
| DM13514P1 | 0.7212881  | 1.0341696  | 1.0763093  | 1.1054994  |            |                |
| DM02978P1 | 0.72131276 | 1.0361534  | -1.0176309 | -1.0062284 |            |                |
| DM07910P3 | 0.72133094 | -1.0734799 | 1.0044041  | 1.0361146  |            |                |
| DM01439P1 | 0.7213873  | -1.1436927 | -1.0032395 | 1.0334789  |            |                |
| DM07732P2 | 0.7216511  | 1.3012826  | 1.0095677  | 1.2530131  |            |                |
| DM11739P2 | 0.7217335  | -1.0134268 | 1.0639082  | 1.0504383  |            |                |
| DM05437P1 | 0.7219688  | -1.015243  | -1.0818247 | -1.0914841 |            |                |
| DM02666P3 | 0.722058   | 1.0181292  | 1.0873353  | 1.0430777  | CG8665     | NM_136263.1    |
| DM10122P1 | 0.7220769  | 1.0425496  | -1.0704594 | -1.1346283 |            |                |
| DM13292P1 | 0.7227409  | -1.1584771 | -1.043899  | -1.4710126 |            |                |
| DM12174P3 | 0.72286236 | 1.041656   | 1.0710787  | 1.0743096  |            |                |
| DM11476P1 | 0.7229339  | 1.0687428  | -1.0376331 | -1.0260293 | DYAK\GE116 | XM_002092419.1 |
| DM11372P2 | 0.7229435  | -1.0367339 | 1.0000978  | -1.071737  |            |                |
| DM15220P3 | 0.7231023  | -1.0496646 | -1.0886041 | 1.0127388  |            |                |
| DM12122P2 | 0.7232875  | 1.0803561  | -1.0367838 | 1.0126379  |            |                |
| DM03335P2 | 0.7233495  | -1.0489317 | -1.0731992 | -1.0190029 |            |                |



|           |            |            |            |            |             |                |
|-----------|------------|------------|------------|------------|-------------|----------------|
| DM07991P1 | 0.72335225 | -1.0449266 | -1.141269  | 1.1294302  |             |                |
| DM15142P2 | 0.72339237 | -1.0663506 | 1.0079575  | -1.0925322 |             |                |
| DM05324P2 | 0.7234798  | 1.0632081  | 1.0205683  | -1.3116682 |             |                |
| DM06459P3 | 0.72353905 | 1.1568651  | 1.4034598  | -1.0215324 |             |                |
| DM10167P1 | 0.7239429  | 1.0390122  | 1.0402637  | 1.051036   |             |                |
| DM13701P2 | 0.72424513 | -1.2347295 | 1.0207567  | 1.0836563  |             |                |
| DM01957P2 | 0.7244042  | -1.0770234 | -1.0336872 | 1.0188127  | RPL13A      | XM_623810.2    |
| DM05896P3 | 0.7246833  | -1.1088536 | -1.2619603 | -1.1412431 |             |                |
| DM08062P3 | 0.72524685 | -2.0663161 | -1.2832835 | -1.249646  |             |                |
| DM09618P3 | 0.7254963  | -1.0108083 | 1.1360863  | 1.2262026  |             |                |
| DM07552P2 | 0.72550434 | -1.0271182 | -1.0852218 | 1.0553026  |             |                |
| DM13501P1 | 0.72550786 | 1.0200218  | 1.0400351  | -1.0623415 |             |                |
| DM04999P1 | 0.7255396  | 1.3870869  | 1.6317403  | 1.017101   |             |                |
| DM01530P1 | 0.7256365  | -1.1644039 | -1.3001814 | -1.2355019 |             |                |
| DM09600P2 | 0.72574896 | 1.1582328  | 1.0713235  | -1.0868533 |             |                |
| DM06622P1 | 0.7260148  | -1.1754895 | 1.0411518  | -1.0710155 | LOC1001421  | XM_001809437.1 |
| DM08185P2 | 0.72602516 | 1.0283138  | -1.1343814 | -1.0940882 |             |                |
| DM12329P3 | 0.72605085 | 1.0456198  | 1.0908722  | 1.1800709  |             |                |
| DM11488P4 | 0.7263697  | -1.0290035 | 1.0675951  | -1.1229458 |             |                |
| DM02375P3 | 0.7264045  | 1.1069977  | 1.4464822  | 1.1519198  | DGR1\GH206  | XM_001986103.1 |
| DM04064P3 | 0.7265243  | 1.1228971  | 1.1391122  | 1.1813236  | AMY         | XM_001653232.1 |
| DM03332P3 | 0.72668123 | -1.019346  | -1.0753081 | -1.1086099 |             |                |
| DM14429P2 | 0.7267024  | 1.0338521  | -1.2994062 | 1.0076733  |             |                |
| DM10416P3 | 0.72671324 | -1.1335284 | 1.1075991  | -1.1186574 |             |                |
| DM05811P3 | 0.7269145  | -1.0028985 | 1.4233688  | 1.3492907  |             |                |
| DM07031P2 | 0.72744334 | 1.1941811  | -1.1622589 | 1.0626712  |             |                |
| DM13202P1 | 0.7275521  | 1.027629   | -1.0801865 | -1.0490314 |             |                |
| DM14476P3 | 0.72778904 | -1.1399982 | -1.0054069 | -1.0358561 | DMOJ\GI140  | XM_002011367.1 |
| DM13110P2 | 0.7277908  | -1.0244561 | 1.2525041  | -1.0110056 |             |                |
| DM01366P3 | 0.7282962  | -1.0607138 | -1.0445579 | -1.1888695 | AAEL_AAEL0C | XM_001651918.1 |
| DM07267P2 | 0.7283737  | 1.1755049  | -1.209708  | -1.1191167 |             |                |
| DM14794P4 | 0.7286435  | -1.1078115 | 1.0233332  | -1.1692324 | CG33138     | NM_176162.1    |
| DM05403P1 | 0.728644   | 1.286293   | 1.1145205  | 1.0532525  |             |                |
| DM09587P3 | 0.72886586 | 1.1292647  | -1.0607963 | -1.1455003 |             |                |
| DM07199P3 | 0.7290892  | -1.373929  | -1.2023369 | -1.1839955 |             |                |
| DM11791P1 | 0.72909045 | -1.0688037 | 1.0791187  | -1.0738294 |             |                |
| DM14929P1 | 0.72924143 | -1.2006493 | -1.2507201 | 1.0504283  |             |                |
| DM06281P1 | 0.7292596  | 1.002396   | 1.0774379  | -1.0434504 |             |                |
| DM00825P2 | 0.72943676 | 1.0769937  | -1.065223  | -1.0153292 | DSIM\GD222  | XM_002078942.1 |
| DM12441P1 | 0.72958726 | 1.0263827  | -1.0090843 | 1.0946655  |             |                |
| DM09477P2 | 0.7296011  | -1.0439818 | -1.0013238 | -1.1834917 |             |                |
| DM10518P2 | 0.72977227 | 1.1105945  | -1.1112163 | -1.0032309 |             |                |
| DM04404P1 | 0.73011005 | 1.0539399  | 1.2110577  | 1.2050827  |             |                |
| DM05491P1 | 0.7301868  | 1.14625    | -1.2143265 | 1.1771072  |             |                |
| DM00889P2 | 0.73033273 | 1.0183605  | 1.0065956  | -1.072716  | DGR1\GH211  | XM_001986064.1 |
| DM08686P1 | 0.7304984  | 1.0607642  | -1.0975088 | 1.1697735  |             |                |
| DM13122P1 | 0.7305231  | -1.0588111 | 1.1048719  | 1.1122669  |             |                |
| DM05576P2 | 0.7305428  | -1.1136643 | -1.0706565 | -1.0348566 | LOC1001591  | XM_001942955.1 |
| DM09279P2 | 0.7306587  | -1.039964  | 1.1073432  | 1.1713845  |             |                |
| DM06639P3 | 0.7308791  | 1.050222   | -1.0621701 | 1.0377278  |             |                |

|           |            |            |            |            |             |                |
|-----------|------------|------------|------------|------------|-------------|----------------|
| DM06362P2 | 0.7313291  | 1.0892357  | -1.0010779 | 1.1499802  |             |                |
| DM05469P4 | 0.7314354  | -1.0777725 | -1.1944987 | -1.2007387 |             |                |
| DM04657P3 | 0.73171824 | -1.175978  | -1.028086  | -1.0063119 |             |                |
| DM03183P1 | 0.7317814  | -1.1108081 | -1.1352096 | -1.0816563 |             |                |
| DM03245P3 | 0.73181856 | -1.1934686 | 1.0229529  | -1.1749691 | LOC577149   | XM_001204341.1 |
| DM02475P1 | 0.7319678  | 1.1353518  | -1.0546396 | 1.067903   |             |                |
| DM09695P1 | 0.73198396 | -1.1178635 | -1.1097654 | -1.0339562 | LOC410325   | XM_393806.3    |
| DM07294P1 | 0.73211354 | -1.0751256 | 1.1571069  | 1.0213972  |             |                |
| DM06880P3 | 0.7321787  | -1.003006  | -1.0029147 | -1.2797165 |             |                |
| DM12713P1 | 0.73230577 | 1.0263283  | 1.0842637  | 1.0779376  |             |                |
| DM06747P2 | 0.7323085  | 1.6932032  | 2.0258172  | 1.295257   |             |                |
| DM03583P3 | 0.73250073 | 1.115551   | 1.1269021  | 1.2462718  |             |                |
| DM04936P1 | 0.73252374 | -1.0553492 | 1.1346885  | 1.0590134  |             |                |
| DM13898P4 | 0.73259544 | -1.1019074 | -1.050611  | 1.1212996  |             |                |
| DM12374P4 | 0.7327104  | 1.002288   | 1.0339818  | -1.0317835 |             |                |
| DM07649P1 | 0.73276347 | 1.0706251  | -1.0814933 | 1.0598774  |             |                |
| DM14479P1 | 0.73313457 | 1.0392761  | 1.0362573  | 1.0548806  |             |                |
| DM08152P3 | 0.73317724 | -1.1511848 | 1.0036565  | -1.0083151 |             |                |
| DM12644P2 | 0.7332505  | -1.038876  | -1.0288575 | -1.0499412 |             |                |
| DM13884P1 | 0.73349124 | -1.0761385 | -1.1881174 | -1.0111729 |             |                |
| DM09794P2 | 0.7336959  | -1.131229  | 1.0160922  | 1.0360521  |             |                |
| DM04624P1 | 0.7338033  | 1.1145687  | 1.0731199  | -1.1724219 |             |                |
| DM06666P2 | 0.7338468  | -1.0631479 | -1.0193372 | -1.0185449 | C14H8ORF46  | NM_001076475.1 |
| DM10297P3 | 0.7343028  | -1.3249011 | -1.1396048 | -1.1438355 | NUP43       | NM_001096913.1 |
| DM03391P2 | 0.7343496  | -1.1267334 | -1.1436607 | -1.0992038 | BRAFLDRAFT  | XM_002601944.1 |
| DM13650P2 | 0.7344757  | -1.0370944 | -1.0052972 | 1.154565   |             |                |
| DM01712P1 | 0.73451334 | -1.0070214 | -1.0522262 | -1.0024524 | LOC660087   | XM_970772.1    |
| DM14130P3 | 0.7347774  | 1.1489135  | 1.1721338  | 1.1933779  |             |                |
| DM04799P1 | 0.7347837  | 1.1761744  | -1.0553639 | 1.4032844  |             |                |
| DM12073P1 | 0.7348065  | 1.1592165  | -1.021955  | -1.0229897 |             |                |
| DM00034P3 | 0.73494697 | 1.0060935  | -1.0764911 | -1.0536268 | LOC552343   | XM_624719.2    |
| DM03453P2 | 0.7351691  | -1.1361647 | -1.0543065 | -1.0583972 | RGD1307844  | NM_001134565.1 |
| DM07159P1 | 0.7352126  | -1.0524279 | 1.0872227  | -1.2994065 |             |                |
| DM08393P3 | 0.73547447 | 1.3612192  | 1.5418795  | 1.1607567  |             |                |
| DM03810P3 | 0.73552704 | 1.0186751  | 1.0677576  | -1.041887  | DSEC\GM110  | XM_002044579.1 |
| DM13524P1 | 0.7355776  | 1.0063418  | 1.1310765  | -1.0069895 |             |                |
| DM02005P4 | 0.7356213  | -1.089226  | -1.0473379 | 1.1447327  | ISCW_ISCWC  | XM_002401228.1 |
| DM13482P3 | 0.73570067 | -1.1471454 | 1.0183152  | -1.0516646 |             |                |
| DM12872P1 | 0.73586094 | -1.0586401 | -1.0907948 | -1.0586939 |             |                |
| DM00254P3 | 0.7360225  | -1.0454984 | -1.0700241 | -1.1582837 | DANA\GF1710 | XM_001953639.1 |
| DM10844P1 | 0.7361193  | -1.0395037 | -1.086398  | -1.0585668 |             |                |
| DM03128P1 | 0.73624057 | -1.0089884 | -1.0285171 | 1.1486529  |             |                |
| DM15345P1 | 0.73665744 | 1.0831053  | 1.0105478  | -1.103553  |             |                |
| DM05900P1 | 0.73719114 | -1.0038424 | 1.2220882  | 1.1250606  | AGAP_AGAP0  | XM_562889.3    |
| DM15030P2 | 0.7372463  | -1.1125907 | -1.081839  | -1.0563949 |             |                |
| DM12282P3 | 0.7375517  | -1.0258583 | 1.0951525  | 1.0343894  |             |                |
| DM04795P3 | 0.73767006 | -1.0718217 | 1.2443546  | 1.1571754  |             |                |
| DM07301P2 | 0.73767966 | -1.1888471 | 1.0038099  | -1.210918  |             |                |
| DM11250P1 | 0.73779595 | -1.1105276 | -1.0969962 | -1.089065  |             |                |
| DM05078P3 | 0.7378923  | 1.079985   | 1.1811501  | 1.1950675  |             |                |

|           |            |            |            |            |            |                |
|-----------|------------|------------|------------|------------|------------|----------------|
| DM06237P2 | 0.737929   | 1.0675544  | -1.1060936 | 1.0292051  |            |                |
| DM10706P4 | 0.738126   | -1.1382068 | -1.11012   | -1.1011133 |            |                |
| DM07351P3 | 0.73818517 | 1.1135888  | -1.1628522 | 1.4258258  | CADM2      | NM_001167675.1 |
| DM01660P4 | 0.7385184  | -1.0071379 | 1.0141153  | 1.1345555  | LOC587610  | XM_787327.2    |
| DM10290P1 | 0.7387572  | 1.0644137  | 1.0430993  | -1.0260365 |            |                |
| DM04568P1 | 0.73887354 | -1.2087016 | -1.3406972 | -1.2447952 | LOC1001977 | XR_053567.1    |
| DM02168P2 | 0.73896205 | -1.0153198 | 1.0711297  | 1.0701468  | LOC724793  | XM_001120139.1 |
| DM04738P1 | 0.73897415 | 1.1608298  | 1.0418972  | 1.0632509  |            |                |
| DM13089P2 | 0.73901594 | 1.2004031  | -1.0955682 | 1.2988169  |            |                |
| DM08010P2 | 0.7391363  | -1.0499084 | -1.0347773 | 1.0572007  |            |                |
| DM06108P1 | 0.73925465 | 1.025206   | -1.2344555 | 1.0333135  |            |                |
| DM02829P3 | 0.7393897  | 1.0321891  | -1.1601771 | -1.0883272 | LOC1002316 | XM_002199210.1 |
| DM12847P1 | 0.73939455 | -1.0155021 | -1.2509928 | -1.1459478 |            |                |
| DM10345P1 | 0.73939806 | -1.0581353 | -1.1819264 | 1.2166268  |            |                |
| DM06068P1 | 0.73980683 | 1.0351963  | -1.1158727 | 1.1651454  | LOC662042  | XM_968166.1    |
| DM07287P3 | 0.7398263  | 1.0672425  | 1.1279782  | 1.153261   |            |                |
| DM10283P3 | 0.73982733 | 1.0754789  | 1.0838155  | 1.1020168  |            |                |
| DM08908P3 | 0.74005324 | 1.0627683  | 1.0671046  | -1.0652565 |            |                |
| DM14266P1 | 0.74023306 | -1.0288646 | -1.2003163 | 1.0109888  |            |                |
| DM07647P2 | 0.74059916 | 1.4375161  | 1.0754526  | 1.1326331  | F22H10.2   | NM_078293.4    |
| DM09420P1 | 0.74062824 | -1.0283514 | 1.0783452  | 1.2823318  |            |                |
| DM10822P4 | 0.7406809  | 1.0481927  | -1.035222  | -1.0371505 | LOC409884  | XM_393374.3    |
| DM13112P3 | 0.74097866 | 1.1486442  | 1.1632617  | 1.104974   |            |                |
| DM13219P3 | 0.7410186  | -1.104545  | 1.0790137  | -1.0044819 |            |                |
| DM14707P3 | 0.74104416 | 1.2587603  | 1.2614334  | -1.0738529 |            |                |
| DM01266P2 | 0.7410725  | -1.0617347 | -1.0526127 | -1.0258962 | TRIADDRAFT | XM_002108192.1 |
| DM03491P1 | 0.7411198  | -1.0487248 | 1.009928   | 1.0081339  | AKR        | XM_001648411.1 |
| DM12839P4 | 0.7411489  | 1.1869022  | 1.009311   | -1.0263351 |            |                |
| DM13098P2 | 0.74120206 | 1.0278213  | 1.1547396  | -1.0128696 |            |                |
| DM14205P4 | 0.74125844 | -1.0657207 | 1.0158666  | -1.0285132 |            |                |
| DM03665P3 | 0.74126476 | -1.0642904 | -1.0401707 | 1.0564954  | PGD        | NM_001021002.1 |
| DM10918P3 | 0.7412964  | 1.1015766  | -1.0723672 | -1.0222155 |            |                |
| DM12330P1 | 0.7413478  | 1.0030054  | -1.061281  | 1.015727   |            |                |
| DM00236P2 | 0.74136525 | -1.1483754 | -1.0227761 | -1.0891067 | BRAFLDRAFT | XM_002609530.1 |
| DM12424P2 | 0.7413743  | -1.0605465 | 1.0085872  | -1.1729174 |            |                |
| DM07214P3 | 0.74169695 | 1.1379606  | 1.1303862  | 1.2185286  |            |                |
| DM10435P1 | 0.7419183  | -1.1162889 | -1.3742228 | -1.340134  |            |                |
| DM00691P3 | 0.74199504 | -1.1964049 | 1.0383481  | -1.1422973 | LOC1001838 | XM_002119399.1 |
| DM01429P1 | 0.7420593  | 1.2709574  | -1.0803392 | 1.0576487  | POPTRDRAFT | XM_002303291.1 |
| DM12487P1 | 0.7421276  | 1.0761173  | -1.04936   | -1.013238  |            |                |
| DM14176P1 | 0.7422382  | 1.0998054  | 1.0260814  | 1.0006033  |            |                |
| DM12620P1 | 0.7424136  | -1.0265284 | -1.0129167 | 1.1812685  |            |                |
| DM10490P3 | 0.74247634 | 1.035493   | 1.0860636  | -1.0475317 |            |                |
| DM00037P4 | 0.74252844 | -1.0562952 | 1.011987   | 1.2957851  |            |                |
| DM02889P2 | 0.74258894 | -1.0518131 | -1.1325177 | -1.1196305 |            |                |
| DM02559P3 | 0.7428296  | 1.0068247  | -1.1120808 | -1.0487075 | DERE\GG194 | XM_001978185.1 |
| DM00083P3 | 0.7428719  | 1.0786326  | -1.0931964 | 1.0139619  | LOC1000103 | XM_001363316.1 |
| DM03728P1 | 0.7430331  | 1.0178741  | -1.0025506 | 1.1400404  | MCCC1      | NM_001044915.1 |
| DM08178P3 | 0.74303687 | 1.1461778  | 1.267453   | 1.1445867  |            |                |
| DM13400P1 | 0.7436461  | -1.2130009 | -1.0978903 | 1.0035641  |            |                |

|           |            |            |            |            |            |                |
|-----------|------------|------------|------------|------------|------------|----------------|
| DM07239P4 | 0.74372935 | 1.1217778  | -1.0496987 | 1.1291777  |            |                |
| DM09833P2 | 0.7439096  | -1.063411  | 1.1080433  | 1.1484306  |            |                |
| DM09419P4 | 0.7439924  | -1.2480539 | -1.0767404 | -1.1022364 |            |                |
| DM04909P2 | 0.7441258  | -1.0631034 | -1.1165053 | -1.0310011 |            |                |
| DM00291P1 | 0.744284   | 1.0350776  | 1.0888542  | 1.1394657  | LOC411557  | XM_395028.3    |
| DM09668P2 | 0.74430573 | 1.1343154  | 1.0688783  | 1.1088364  |            |                |
| DM06927P3 | 0.74435407 | 1.0263759  | 1.0970527  | 1.1380764  |            |                |
| DM10645P2 | 0.74448746 | 1.0432361  | 1.0990603  | 1.0114486  |            |                |
| DM01069P1 | 0.7445437  | -1.1112244 | 1.0758009  | 1.1164535  |            |                |
| DM09725P1 | 0.7445589  | 1.0258524  | -1.0815129 | -1.0718871 |            |                |
| DM01056P2 | 0.7445672  | 1.1395719  | 1.1042136  | 1.017288   | CYP        | XM_001649921.1 |
| DM00121P3 | 0.7446029  | -1.385595  | -1.174329  | -1.1315043 |            |                |
| DM10386P2 | 0.7446619  | 1.0850878  | 1.4304086  | 1.1535692  |            |                |
| DM05658P1 | 0.74473226 | -1.1760285 | -1.0178931 | -1.1821578 |            |                |
| DM11761P3 | 0.74477077 | 1.054581   | -1.1370414 | -1.1174161 |            |                |
| DM14189P2 | 0.74488366 | -1.1746361 | 1.544577   | 1.0064379  |            |                |
| DM03365P3 | 0.7453908  | -1.1019198 | -1.1033627 | -1.0035509 | MPER_13743 | XM_002387459.1 |
| DM03396P1 | 0.74550265 | -1.0415642 | -1.1140611 | -1.0759618 | STIP1      | NM_001043492.1 |
| DM10658P1 | 0.7458328  | -1.0582575 | 1.0398794  | 1.0351064  |            |                |
| DM00984P2 | 0.7462182  | 1.1126325  | -1.1122903 | 1.1637514  |            |                |
| DM00798P1 | 0.746521   | 1.0512744  | -1.0058641 | 1.133837   | DERE\GG118 | XM_001981063.1 |
| DM02815P1 | 0.7466985  | -1.0356619 | 1.0856616  | 1.0909137  |            |                |
| DM07069P2 | 0.7471237  | -1.3592684 | -1.1154248 | -1.4108135 |            |                |
| DM14063P1 | 0.7472569  | 1.1341617  | 1.1930429  | 1.0142102  |            |                |
| DM13238P3 | 0.7474939  | -1.024136  | 1.015571   | -1.3359237 |            |                |
| DM12571P1 | 0.74749696 | 1.2551936  | 1.3715719  | 1.1117363  |            |                |
| DM06581P1 | 0.747831   | 1.0611702  | -1.3235707 | 1.0585548  |            |                |
| DM08369P3 | 0.7479624  | -1.0654147 | -1.2650189 | -1.1290411 |            |                |
| DM01400P2 | 0.7480936  | 1.0153059  | -1.03056   | 1.0787523  |            |                |
| DM04660P1 | 0.7484492  | -1.195793  | -1.1799142 | -1.0557178 |            |                |
| DM00093P1 | 0.74852824 | 1.0335287  | 1.0724996  | 1.1019828  | DOA        | NM_001043299.3 |
| DM07408P1 | 0.74857336 | -1.029212  | -1.1867553 | -1.1019833 |            |                |
| DM13694P1 | 0.74861336 | -1.1484015 | 1.0001225  | 1.0666736  |            |                |
| DM07079P1 | 0.74872404 | -1.1995213 | -1.0202876 | -1.1950843 |            |                |
| DM14871P1 | 0.7487458  | -1.0324639 | -1.1368444 | 1.0358405  |            |                |
| DM00453P3 | 0.74876505 | 1.0185556  | -1.0546165 | -1.0343732 | BRAFLDRAFT | XM_002605962.1 |
| DM03817P2 | 0.7488005  | -1.2511779 | -1.1222625 | 1.0488278  |            |                |
| DM10309P3 | 0.74884284 | 1.5485067  | 1.6279062  | 1.4922014  |            |                |
| DM02158P1 | 0.74890894 | -1.0879239 | -1.0406793 | -1.3775761 |            |                |
| DM14880P1 | 0.74891984 | -1.1323781 | -1.1468534 | -1.4154811 |            |                |
| DM01542P3 | 0.7490204  | 1.1335402  | -1.0344694 | 1.2213764  |            |                |
| DM12811P1 | 0.7491795  | -1.016377  | 1.0861177  | -1.0057844 |            |                |
| DM04289P1 | 0.749241   | 1.0650682  | 1.1897749  | 1.1509502  |            |                |
| DM05077P2 | 0.7493664  | 1.0525112  | 1.1494672  | 1.0328908  |            |                |
| DM10605P3 | 0.7495627  | 1.0193998  | 1.1421088  | 1.0871454  |            |                |
| DM05979P2 | 0.7496668  | -1.0311444 | -1.2103264 | 1.0877517  | PDP1       | XM_391997.3    |
| DM06140P2 | 0.7498046  | 1.078931   | -1.0418179 | -1.0998737 |            |                |
| DM09672P1 | 0.7498107  | -1.1725261 | -1.2690787 | -1.0504193 |            |                |
| DM04972P1 | 0.7499503  | -1.0033784 | -1.1901009 | -1.1169113 |            |                |
| DM08987P3 | 0.7500075  | -1.0446357 | -1.0903026 | -1.0329354 |            |                |

|           |            |            |            |            |                            |
|-----------|------------|------------|------------|------------|----------------------------|
| DM13555P2 | 0.7501418  | 1.1347823  | 1.4168919  | 1.0093062  |                            |
| DM08227P2 | 0.7502543  | 1.1165891  | 1.0244111  | 1.1092162  |                            |
| DM02838P3 | 0.75029457 | 1.0646516  | -1.0327779 | -1.0996311 | LOC1001680` XM_001951846.1 |
| DM05921P2 | 0.7506738  | -1.0955701 | -1.0073409 | -1.056669  |                            |
| DM07460P2 | 0.75075895 | -1.0771965 | 1.031957   | 1.0274303  |                            |
| DM10612P3 | 0.7508405  | -1.0578789 | -1.1529155 | -1.2917509 |                            |
| DM15226P3 | 0.7509117  | -1.2136185 | -1.0632234 | -1.056497  | DWIL\GK117: XM_002069775.1 |
| DM03987P2 | 0.7510204  | 1.0967621  | 1.1314429  | 1.0247613  | RAB2B NM_001005636.1       |
| DM03228P3 | 0.75118303 | 1.0366689  | 1.0111884  | 1.1032431  |                            |
| DM10260P3 | 0.75140244 | -1.0247245 | 1.0687454  | 1.0121028  |                            |
| DM07055P4 | 0.75147235 | 1.0367867  | 1.0351106  | 1.1242743  |                            |
| DM13001P1 | 0.75149643 | -1.0888851 | -1.2346287 | -1.2307267 |                            |
| DM05917P4 | 0.75150126 | -1.052318  | -1.0137062 | -1.0543747 | TRIADDRAFT_ XM_002112462.1 |
| DM02284P3 | 0.7515428  | -1.1729925 | -1.0332304 | -1.1881766 | LOC1002235{ XM_002198572.1 |
| DM01656P1 | 0.75155115 | -1.0240126 | -1.0637523 | 1.0065268  | RPL26 XM_001845651.1       |
| DM10361P3 | 0.75191146 | -1.1113714 | -1.0956702 | -1.039437  |                            |
| DM01185P2 | 0.75199074 | 1.0288315  | -1.0286493 | 1.0455269  |                            |
| DM11812P3 | 0.7520883  | 1.2740284  | 1.532141   | 1.0799425  |                            |
| DM05261P3 | 0.7521572  | 1.0077116  | -1.0739316 | -1.0533407 |                            |
| DM04225P3 | 0.7521851  | -1.1342555 | 1.1080017  | -1.3008301 |                            |
| DM10378P1 | 0.7521861  | 1.0169523  | 1.0721402  | 1.0688981  |                            |
| DM05419P3 | 0.7523275  | -1.0893619 | 1.0409185  | -1.1011996 |                            |
| DM04675P2 | 0.7523559  | -1.0510685 | -1.0319824 | -1.1104748 |                            |
| DM03280P1 | 0.7525872  | 1.004938   | -1.0781683 | -1.0777268 |                            |
| DM02170P4 | 0.7527869  | -1.2154393 | -1.0987084 | -1.0533336 | LOC1001162! XM_001600744.1 |
| DM02044P4 | 0.752814   | -1.0530816 | 1.1509304  | 1.3824363  |                            |
| DM04561P4 | 0.7528186  | 1.0585338  | -1.068633  | 1.2685455  |                            |
| DM09425P2 | 0.7528239  | 1.0630738  | 1.0684501  | -1.00531   |                            |
| DM07025P4 | 0.752963   | -1.1427721 | -1.1610417 | -1.0222801 |                            |
| DM08900P3 | 0.753207   | -1.0261664 | -1.2279094 | 1.0113527  |                            |
| DM13623P1 | 0.75329703 | -1.1542237 | 1.1195804  | -1.0052996 |                            |
| DM06063P3 | 0.753446   | 1.0261011  | 1.2830766  | 1.3375129  | AAEL_AAEL01 XM_001648682.1 |
| DM01093P3 | 0.7534714  | 1.2103487  | 1.0821985  | 1.1392972  | LOC583677 XM_001193581.1   |
| DM14179P3 | 0.7536328  | -1.1025599 | -1.2749265 | -1.0023484 |                            |
| DM01577P1 | 0.75366294 | -1.0157288 | -1.0231984 | -1.0145735 | LOC1002046` XR_053596.1    |
| DM03933P3 | 0.7538984  | -1.0384002 | 1.0905211  | 1.0996883  |                            |
| DM14098P2 | 0.7539128  | -1.0588313 | 1.0145354  | -1.0476202 |                            |
| DM09584P2 | 0.7539265  | 1.0336783  | -1.0672562 | -1.1114466 |                            |
| DM03331P2 | 0.7539592  | 1.1614653  | 1.0035524  | -1.1570163 | NEMVEDRAFT XM_001634388.1  |
| DM03338P3 | 0.75401723 | -1.1136923 | -1.0642259 | -1.194778  | ATPALPHA XM_623069.2       |
| DM01648P1 | 0.75441533 | -1.0527446 | -1.1557136 | -1.1490418 | DMOJ\GI1669 XM_002011926.1 |
| DM04811P3 | 0.75441533 | 1.0140138  | 1.1024917  | -1.0368059 |                            |
| DM05038P3 | 0.7547464  | -1.0316646 | -1.1001348 | -1.1357706 |                            |
| DM04869P2 | 0.7548148  | -1.0470594 | -1.2760094 | 1.0357964  |                            |
| DM07062P3 | 0.75490475 | 1.0534303  | 1.0331854  | -1.2688249 |                            |
| DM06935P2 | 0.75490654 | -1.0147511 | -1.0507858 | 1.1145246  |                            |
| DM09087P2 | 0.7549691  | -1.0986829 | 1.0190493  | -1.0678536 |                            |
| DM13863P3 | 0.75524765 | -1.0761693 | 1.0758122  | -1.0780218 |                            |
| DM13017P3 | 0.75532246 | 1.0903453  | -1.0028507 | 1.0390369  |                            |
| DM00958P1 | 0.75545347 | 1.0612622  | -1.214504  | 1.0197698  | LOC662234 XM_968346.1      |

|           |            |            |            |            |             |                |
|-----------|------------|------------|------------|------------|-------------|----------------|
| DM10279P1 | 0.75557995 | 1.0475109  | -1.0373398 | 1.0712541  |             |                |
| DM10865P1 | 0.7557072  | -1.1885281 | -1.0940193 | 1.0798534  |             |                |
| DM09163P3 | 0.7557204  | 1.0632267  | 1.0205212  | 1.1785489  |             |                |
| DM03752P3 | 0.7559155  | 1.1029476  | 1.0435481  | 1.266713   |             |                |
| DM09014P1 | 0.7559442  | 1.09679    | 1.0137943  | -1.0010005 |             |                |
| DM03539P2 | 0.7559586  | 1.0408111  | -1.0731044 | -1.0749822 |             |                |
| DM06282P4 | 0.7559774  | 1.0453708  | -1.082025  | -1.0479649 |             |                |
| DM03761P2 | 0.75613326 | 1.0173669  | -1.0236076 | 1.0496597  | LOC587548   | XR_025944.1    |
| DM07180P3 | 0.7564481  | -1.2512547 | -1.1287982 | -1.096204  |             |                |
| DM05779P2 | 0.7564552  | -1.0053715 | 1.0943447  | -1.0026368 |             |                |
| DM14008P3 | 0.75649977 | 1.1739811  | 1.370721   | 1.1025499  |             |                |
| DM12482P2 | 0.75663716 | -1.0250721 | -1.0142746 | 1.0985242  |             |                |
| DM01713P4 | 0.7568884  | 1.021594   | -1.0429322 | -1.0106744 | LOC1001629  | XM_001942706.1 |
| DM12359P2 | 0.7569188  | 1.0002668  | -1.0318762 | 1.049962   |             |                |
| DM09925P3 | 0.7570927  | -1.1963819 | -1.0718548 | -1.2540095 |             |                |
| DM12148P1 | 0.75728506 | 1.1020758  | -1.1311538 | 1.0168016  |             |                |
| DM03460P2 | 0.7573317  | -1.1639876 | -1.130832  | -1.0294325 |             |                |
| DM06176P4 | 0.7574301  | 1.0231607  | 1.1878209  | 1.1563911  |             |                |
| DM08753P1 | 0.75747645 | 1.0370044  | -1.03635   | 1.1005293  |             |                |
| DM13145P1 | 0.7576299  | -1.0983528 | -1.2150477 | -1.2330568 |             |                |
| DM04997P3 | 0.7579655  | -1.0317672 | -1.218718  | -1.1029514 |             |                |
| DM11548P4 | 0.7580066  | 1.0587231  | -1.1090859 | 1.0164521  |             |                |
| DM03707P1 | 0.7582362  | 1.0872476  | 1.2218503  | 1.1969607  | LOC1001761  | XM_002130235.1 |
| DM13893P1 | 0.75823903 | -1.0752951 | 1.0206835  | 1.0420526  |             |                |
| DM09627P3 | 0.75839365 | -1.1080676 | 1.002669   | -1.0378699 |             |                |
| DM12608P1 | 0.7585554  | -1.0217646 | 1.0105299  | -1.0214666 |             |                |
| DM11705P4 | 0.75872195 | 1.0275596  | 1.0704594  | 1.1478367  |             |                |
| DM11711P3 | 0.75878227 | 1.155901   | 1.2630123  | 1.0956508  |             |                |
| DM04836P2 | 0.7589453  | 1.0328635  | 1.0119859  | 1.0327582  | RPL12       | XM_001865496.1 |
| DM00586P1 | 0.7590112  | -1.0135975 | 1.0138866  | 1.0338129  | NADSYN1     | NM_001099253.1 |
| DM03002P1 | 0.7590165  | -1.0371753 | -1.0700155 | -1.1638294 |             |                |
| DM09348P1 | 0.75902975 | 1.1004223  | 1.0324594  | -1.4389701 |             |                |
| DM06702P2 | 0.759371   | -1.128204  | -1.0885906 | -1.0816742 |             |                |
| DM09960P1 | 0.7594009  | 1.0603522  | -1.0461662 | 1.0219693  |             |                |
| DM01225P3 | 0.75945234 | -1.0654976 | -1.1121763 | 1.0054048  | LOC1001770  | XM_002129947.1 |
| DM02708P2 | 0.75946146 | 1.0162545  | -1.0308654 | 1.0258957  | DVIR\GJ1032 | XM_002056224.1 |
| DM06470P1 | 0.7596331  | 1.0084586  | -1.0284077 | -1.0497993 |             |                |
| DM08996P3 | 0.75964326 | -1.0822277 | -1.2759181 | -1.0704125 |             |                |
| DM14720P3 | 0.7598575  | -1.1374713 | 1.0753739  | -1.0093513 |             |                |
| DM00910P1 | 0.75992393 | 1.1631634  | 1.0967077  | 1.2202501  | AAEL_AAELOC | XM_001650836.1 |
| DM00832P2 | 0.7599371  | 1.0330772  | 1.0223356  | 1.0946127  |             |                |
| DM02019P2 | 0.7599845  | 1.1103549  | -1.137369  | 1.1315348  | LOC1001849  | XM_002129124.1 |
| DM02025P3 | 0.76000124 | -1.160546  | -1.1595676 | -1.0339148 |             |                |
| DM07340P2 | 0.76012164 | -1.0041697 | 1.131724   | 1.1181834  |             |                |
| DM10698P1 | 0.7601711  | 1.0291913  | -1.0711805 | 1.0451832  |             |                |
| DM07106P1 | 0.7602178  | -1.0402851 | -1.0042696 | -1.0133001 |             |                |
| DM02280P2 | 0.76029456 | -1.1006494 | -1.0289237 | -1.007899  | BRAFLDRAFT  | XM_002613168.1 |
| DM07867P2 | 0.7603841  | -1.0187955 | 1.0175323  | 1.0934284  |             |                |
| DM02945P3 | 0.7603914  | -1.0305709 | 1.0224552  | -1.0519377 | LOC474929   | XM_532163.2    |
| DM11621P3 | 0.76059353 | 1.0039531  | -1.021445  | -1.0297884 |             |                |

|           |            |            |            |            |                           |                |
|-----------|------------|------------|------------|------------|---------------------------|----------------|
| DM13723P2 | 0.7606726  | 1.1223062  | -1.014329  | -1.0607904 |                           |                |
| DM01580P1 | 0.7608557  | -1.0221658 | 1.0039387  | 1.0014504  | DSEC\GM133 XM_002042311.1 |                |
| DM01693P3 | 0.76090103 | -1.0373075 | -1.0868021 | -1.07603   | LOC657158 XM_961518.2     |                |
| DM05072P3 | 0.7609429  | -1.1339616 | -1.1398963 | -1.0482833 |                           |                |
| DM13859P2 | 0.760953   | -1.1834269 | -1.0080959 | -1.0410968 |                           |                |
| DM09867P1 | 0.76104814 | 1.0348538  | 1.0016066  | 1.0867432  | EHI_023490 XM_650530.1    |                |
| DM13177P2 | 0.7611206  | -1.0617064 | -1.0395544 | 1.0902649  |                           |                |
| DM05818P1 | 0.7612312  | -1.0823964 | -1.0198853 | -1.0056261 |                           |                |
| DM10523P1 | 0.7612573  | 1.0203469  | -1.004445  | -1.0592332 |                           |                |
| DM00973P2 | 0.76127    | -1.087411  | -1.0968996 | -1.3068857 |                           |                |
| DM05080P3 | 0.761451   | -1.0777248 | -1.1048768 | -1.0204029 |                           |                |
| DM14486P2 | 0.7614566  | 1.0141535  | 1.284836   | 1.192784   |                           |                |
| DM02572P2 | 0.76151973 | 1.0048848  | 1.1057118  | 1.0861472  | GOT1                      | NM_001135449.2 |
| DM02927P1 | 0.7619675  | -1.0228024 | 1.0436121  | 1.2445765  |                           |                |
| DM06971P2 | 0.76201314 | 1.1089183  | 1.1118354  | 1.2469685  |                           |                |
| DM11852P1 | 0.7620398  | 1.188482   | 1.2127031  | 1.0907506  |                           |                |
| DM06628P3 | 0.76231766 | -1.1700821 | -1.2930166 | 1.0811828  |                           |                |
| DM06039P1 | 0.7625872  | -1.0120776 | 1.1471423  | 1.0608116  | LOC662042 XM_968166.1     |                |
| DM04603P2 | 0.76260036 | -1.0004389 | -1.0053341 | -1.1260257 | ZGC:101016 NM_001004001.1 |                |
| DM13688P1 | 0.762789   | -1.0796394 | -1.1063803 | 1.0125161  | DERE\GG156 XM_001972555.1 |                |
| DM12793P3 | 0.7628745  | -1.0914812 | -1.043937  | 1.0135084  |                           |                |
| DM04620P2 | 0.7629343  | -1.0594016 | -1.1025507 | -1.1087029 |                           |                |
| DM08598P3 | 0.7629485  | 1.0052867  | -1.0033445 | -1.0963053 |                           |                |
| DM06089P2 | 0.7629635  | -1.0942843 | 1.012622   | 1.058858   |                           |                |
| DM06416P1 | 0.7630961  | -1.0191697 | 1.2528352  | -1.1544594 | DSEC\GM138 XM_002035500.1 |                |
| DM14180P2 | 0.7631177  | -1.0431119 | -1.372601  | 1.3666694  |                           |                |
| DM14835P2 | 0.76317674 | 1.0607209  | -1.139259  | -1.1036856 |                           |                |
| DM02791P3 | 0.7634019  | 1.301079   | 1.0388288  | 1.0765445  | NCKAP1                    | XM_624328.2    |
| DM10964P1 | 0.7635297  | -1.0623914 | -1.0282434 | -1.0635996 |                           |                |
| DM11579P1 | 0.76357156 | 1.027869   | 1.0716203  | 1.0218391  |                           |                |
| DM09072P1 | 0.7635809  | -1.0243897 | 1.0212907  | 1.0673139  |                           |                |
| DM07579P1 | 0.763743   | -1.0795488 | -1.0415062 | 1.1336583  |                           |                |
| DM13883P1 | 0.7637597  | 1.0787488  | -1.2151333 | -1.0023305 |                           |                |
| DM07646P1 | 0.763781   | 1.0957587  | 1.0980227  | 1.18548    |                           |                |
| DM05311P1 | 0.7640465  | -1.0752795 | -1.0910326 | -1.1055025 |                           |                |
| DM12431P1 | 0.7641725  | 1.0272266  | -1.2885841 | -1.1567487 |                           |                |
| DM10331P2 | 0.7642187  | -1.0478984 | -1.0680367 | -1.1991282 |                           |                |
| DM00779P2 | 0.7643069  | -1.1252142 | 1.1137494  | -1.1653048 | NEMVEDRAFT XM_001631896.1 |                |
| DM05468P1 | 0.76440936 | -1.0298212 | -1.0107511 | -1.1030084 | AGAP_AGAP0 XM_320365.2    |                |
| DM01466P3 | 0.7644979  | 1.1508199  | 1.0289494  | -1.0357878 | BRAFLDRAFT XM_002597178.1 |                |
| DM06888P2 | 0.76457065 | 1.1526687  | 1.1111057  | -1.0535778 |                           |                |
| DM04178P3 | 0.76471317 | 1.0970991  | 1.1077693  | -1.0243134 |                           |                |
| DM11624P1 | 0.7648909  | -1.0455129 | -1.0771098 | -1.0790942 | DSIM\GD251 XM_002082605.1 |                |
| DM00487P1 | 0.7649221  | -1.0588754 | 1.0911658  | -1.0473181 | ADRBK                     | XM_001652241.1 |
| DM04488P3 | 0.7649332  | 1.2171743  | 1.2623739  | 1.0606912  |                           |                |
| DM13387P2 | 0.76529664 | 1.0397921  | -1.1151129 | -1.022951  |                           |                |
| DM12956P1 | 0.7653377  | -1.094834  | -1.0784941 | 1.0718498  |                           |                |
| DM08506P4 | 0.7654123  | -1.0135833 | -1.2968073 | -1.05778   |                           |                |
| DM07535P2 | 0.7655406  | 1.0041375  | -1.0231212 | -1.1411006 |                           |                |
| DM13081P1 | 0.76571405 | 1.1320821  | -1.0810707 | 1.0106945  |                           |                |

|           |            |            |            |            |                           |
|-----------|------------|------------|------------|------------|---------------------------|
| DM09875P1 | 0.7657957  | 1.0408845  | -1.1104269 | -1.100233  |                           |
| DM14967P2 | 0.7658327  | -1.0308149 | 1.1552933  | -1.069384  |                           |
| DM08793P1 | 0.76603276 | 1.0909079  | 1.101773   | -1.0509294 |                           |
| DM13477P1 | 0.76604825 | -1.0528789 | 1.0109868  | 1.1200008  |                           |
| DM05760P1 | 0.7661307  | 1.0127264  | 1.0389857  | -1.0885742 |                           |
| DM08805P2 | 0.7664299  | -1.0187386 | -1.0879664 | -1.1245875 |                           |
| DM09771P2 | 0.7664304  | -1.0016658 | -1.1087753 | 1.0477337  |                           |
| DM04081P1 | 0.76643926 | 1.032695   | -1.2762306 | 1.066819   |                           |
| DM02963P1 | 0.76647455 | -1.0193219 | -1.2780297 | -1.0758243 | DSIM\GD183 XM_002104568.1 |
| DM01731P4 | 0.76647985 | 1.0252721  | -1.0553758 | 1.0910959  |                           |
| DM06585P3 | 0.7667111  | 1.1857798  | 1.0922852  | 1.2020159  |                           |
| DM13994P1 | 0.7669637  | 1.0902202  | -1.0354105 | 1.0014453  |                           |
| DM09061P2 | 0.7669939  | -1.0207824 | -1.3159986 | 1.065907   |                           |
| DM07168P2 | 0.76705045 | -1.0480227 | -1.0279815 | -1.0085937 |                           |
| DM09270P1 | 0.76713234 | 1.1551092  | 1.2015339  | 1.2009312  |                           |
| DM05750P1 | 0.76738846 | -1.1362574 | 1.0393722  | -1.1242487 |                           |
| DM07039P3 | 0.7678183  | 1.0613941  | 1.0045706  | -1.0237533 |                           |
| DM09965P1 | 0.76788014 | 1.1349043  | 1.0107708  | 1.0475788  |                           |
| DM04010P3 | 0.76806706 | 1.1490574  | -1.0528717 | -1.1008501 |                           |
| DM14552P3 | 0.76824737 | 1.1249405  | 1.0862231  | 1.2526246  |                           |
| DM10045P1 | 0.768455   | -1.4497583 | 1.0952598  | -1.1851074 |                           |
| DM02509P1 | 0.7685603  | -1.1173433 | -1.6039908 | -1.0706642 |                           |
| DM08593P1 | 0.768611   | -1.1347244 | -1.0721152 | -1.0622733 |                           |
| DM03700P4 | 0.76887476 | -1.0705899 | -1.0430045 | 1.0802538  | DERE\GG145 XM_001971276.1 |
| DM05932P3 | 0.7689145  | -1.0326498 | -1.0538355 | -1.0324188 | NEMVEDRAFT XM_001637618.1 |
| DM09442P1 | 0.7692435  | -1.0178362 | 1.1127416  | -1.2447782 |                           |
| DM14587P2 | 0.7693571  | -1.0817329 | -1.1627719 | -1.124111  |                           |
| DM04328P2 | 0.7694235  | 1.1591518  | 1.0869734  | -1.0495768 |                           |
| DM08976P3 | 0.7695668  | 1.1096311  | -1.1707537 | -1.2707026 |                           |
| DM09402P2 | 0.7696193  | 1.0525181  | 1.0658368  | -1.0196059 | LOC1002054(XM_002170163.1 |
| DM12624P3 | 0.7697859  | 1.0830573  | 1.617116   | 1.1711956  |                           |
| DM08041P1 | 0.77012163 | 1.0400026  | 1.1688552  | 1.1975058  |                           |
| DM14634P1 | 0.7701411  | 1.1651046  | 1.1070899  | 1.043608   |                           |
| DM03709P4 | 0.77016574 | 1.0722739  | -1.0424591 | -1.0566145 | AATS-VAL XM_002090911.1   |
| DM08998P1 | 0.77025753 | 1.0010322  | -1.0067849 | -1.0496126 |                           |
| DM10191P1 | 0.7703197  | -1.0633503 | 1.0118663  | 1.0154836  | LOC658988 XM_965329.2     |
| DM12063P1 | 0.7704287  | 1.1053959  | 1.1722811  | 1.0241952  |                           |
| DM04453P2 | 0.77052027 | -1.0854677 | -1.0784407 | 1.1276146  |                           |
| DM10240P3 | 0.77059406 | -1.1169734 | -1.0067008 | -1.0905926 |                           |
| DM06199P2 | 0.7707533  | 1.1336322  | 1.0621936  | 1.035753   | LOC1001801 XM_002126252.1 |
| DM10020P3 | 0.7708887  | 1.0864109  | 1.0331041  | 1.1255444  |                           |
| DM03444P3 | 0.77098256 | 1.264563   | -1.0125227 | 1.1316803  | CG18549 NM_141946.2       |
| DM05797P3 | 0.7709856  | -1.0273178 | -1.0275052 | -1.0453738 | DWIL\GK245 XM_002066555.1 |
| DM05114P2 | 0.7709856  | 1.1279831  | -1.001973  | -1.0938753 |                           |
| DM02805P2 | 0.7709975  | -1.1065514 | -1.0385722 | 1.0801198  | LOC1001175 XM_001601701.1 |
| DM08697P1 | 0.77138114 | -1.0911858 | -1.1972965 | -1.0064402 |                           |
| DM04389P1 | 0.77190024 | -1.2539723 | -1.1776683 | -1.2207403 |                           |
| DM06248P1 | 0.77220607 | 1.0412688  | 1.0220507  | 1.0913926  |                           |
| DM11351P1 | 0.77236325 | 1.1072874  | -1.1795156 | -1.0197337 |                           |
| DM12451P1 | 0.77251035 | 1.1458348  | -1.0192916 | -1.1104754 | LOC724961 XM_001120862.1  |



|           |            |            |            |            |            |                |
|-----------|------------|------------|------------|------------|------------|----------------|
| DM14854P1 | 0.7725595  | -1.072993  | 1.0629456  | 1.0685626  | LOC1001150 | XM_001607900.1 |
| DM01255P3 | 0.77273095 | 1.0218619  | -1.0644737 | -1.0332057 |            |                |
| DM07774P2 | 0.77273804 | -1.0637871 | 1.0127261  | 1.1396694  |            |                |
| DM13797P3 | 0.7730099  | -1.0704595 | -1.1546094 | -1.1571127 |            |                |
| DM10557P1 | 0.7730816  | 1.0253073  | -1.021446  | -1.0633433 |            |                |
| DM15401P1 | 0.77314323 | -1.101137  | 1.5123436  | 1.3014021  |            |                |
| DM11788P2 | 0.773325   | -1.0402813 | 1.1177728  | -1.2128845 | MGL_3515   | XM_001729428.1 |
| DM09321P3 | 0.7736547  | 1.20257    | 1.1932386  | 1.2386249  |            |                |
| DM03197P1 | 0.77373224 | -1.049169  | 1.0427196  | -1.0268956 | LOC551838  | XM_624223.1    |
| DM15145P3 | 0.7738758  | -1.078624  | -1.0715362 | 1.1102878  |            |                |
| DM09958P4 | 0.7740008  | -1.0091553 | 1.1050363  | 1.2544441  |            |                |
| DM08179P3 | 0.7740102  | -1.1272959 | 1.0808024  | 1.1265775  |            |                |
| DM04571P2 | 0.77412176 | -1.0550075 | -1.132911  | 1.0764877  |            |                |
| DM06033P2 | 0.7742085  | 1.023      | -1.0774765 | 1.0411252  |            |                |
| DM13748P1 | 0.7745264  | 1.2550036  | 1.0976462  | -1.0239706 |            |                |
| DM05101P2 | 0.7745721  | 1.0797645  | -1.16003   | 1.141444   |            |                |
| DM08317P3 | 0.774583   | 1.1261046  | 1.1472409  | 1.0525094  |            |                |
| DM02502P2 | 0.77467424 | 1.0443054  | 1.0366884  | -1.056981  |            |                |
| DM13272P3 | 0.77508396 | -1.103204  | -1.220481  | -1.1416479 |            |                |
| DM02086P2 | 0.775087   | -1.1028752 | -1.0490594 | -1.0491214 | DMOJ\GI239 | XM_001998426.1 |
| DM07322P1 | 0.77510375 | -1.0591791 | 1.0259937  | 1.0606247  |            |                |
| DM14281P2 | 0.77527314 | -1.009137  | 1.0927199  | -1.0374129 |            |                |
| DM13376P3 | 0.77528554 | 1.0749454  | 1.0482394  | -1.0147508 |            |                |
| DM08964P1 | 0.7755814  | -1.0182183 | -1.0399556 | -1.0897534 |            |                |
| DM05210P3 | 0.7757987  | -1.108341  | -1.1496127 | -1.0244782 |            |                |
| DM06490P2 | 0.77585447 | 1.0079104  | -1.3327912 | 1.0212635  |            |                |
| DM02310P3 | 0.7759189  | -1.0296899 | -1.0375191 | 1.0097944  | BRAFLDRAFT | XM_002611682.1 |
| DM09817P4 | 0.77605754 | -1.0367823 | 1.24669    | 1.0272768  | LOC1001134 | XM_001599018.1 |
| DM08341P1 | 0.77626216 | -1.0685555 | 1.0203568  | 1.0369319  |            |                |
| DM06305P3 | 0.77632326 | 1.2026613  | 1.3436917  | 1.0634866  |            |                |
| DM03439P3 | 0.7764404  | 1.0432158  | 1.0183009  | 1.0551982  | LOC1000144 | XM_001368681.1 |
| DM03965P3 | 0.7764569  | 1.2809724  | 1.5124558  | 1.1206304  |            |                |
| DM15029P1 | 0.7764848  | 1.1272426  | -1.0132776 | 1.1162909  |            |                |
| DM08643P1 | 0.7765208  | -1.2015169 | -1.2858928 | -1.3311967 |            |                |
| DM02523P3 | 0.7765446  | -1.3265498 | -1.1783721 | -1.2560381 | ACE        | NM_001033015.2 |
| DM04168P2 | 0.7767385  | -1.154685  | -1.0248479 | 1.0851171  |            |                |
| DM01123P1 | 0.77673984 | 1.073223   | -1.0415221 | 1.0127344  | MYO1D      | NM_001075838.1 |
| DM09630P1 | 0.77680063 | 1.0023894  | 1.0624025  | -1.0312378 |            |                |
| DM07309P1 | 0.77686656 | -1.0356364 | -1.2233808 | 1.107032   |            |                |
| DM04202P1 | 0.77702606 | -1.0724537 | 1.0439881  | -1.0415797 |            |                |
| DM10894P3 | 0.77711505 | 1.2793031  | 1.1498067  | 1.1826236  |            |                |
| DM01415P1 | 0.7772007  | 1.0611538  | 1.06396    | 1.1018449  | CLK2       | NM_001031326.1 |
| DM10485P1 | 0.7772869  | 1.0704173  | -1.0470177 | -1.3167449 |            |                |
| DM03181P3 | 0.77733356 | -1.1149094 | -1.1211271 | -1.0382615 |            |                |
| DM02407P4 | 0.77734494 | 1.2029936  | 1.1217709  | 1.1547755  |            |                |
| DM13933P1 | 0.7775323  | 1.1506033  | -1.1251881 | -1.0036993 |            |                |
| DM04638P4 | 0.77754194 | 1.020875   | 1.0924093  | 1.119283   |            |                |
| DM10009P3 | 0.7777298  | -1.2997311 | -1.0890762 | -1.0432919 |            |                |
| DM05902P4 | 0.77828723 | -1.181342  | 1.019826   | -1.0902154 |            |                |
| DM07629P2 | 0.77844566 | 1.0977     | 1.1493677  | 1.050886   |            |                |

|           |            |            |            |            |                            |
|-----------|------------|------------|------------|------------|----------------------------|
| DM10235P1 | 0.77855724 | -1.058281  | -1.1170862 | -1.0399946 |                            |
| DM07619P3 | 0.77856636 | -1.055974  | -1.0153606 | -1.1010001 |                            |
| DM02078P4 | 0.7787004  | -1.0574735 | -1.0404515 | 1.0193994  | LOC656010 XM_962566.2      |
| DM02747P2 | 0.7787788  | 1.1007382  | 1.140242   | -1.0397723 |                            |
| DM09829P1 | 0.7788989  | 1.2717466  | 1.127658   | -1.0174658 |                            |
| DM13677P1 | 0.77890575 | -1.1462892 | -1.1117123 | -1.0108378 |                            |
| DM13775P1 | 0.77915573 | 1.0897722  | 1.0222595  | -1.0697595 |                            |
| DM07882P2 | 0.77920765 | 1.1007227  | 1.1357481  | 1.1756594  | NEMVEDRAFT XM_001627187.1  |
| DM15120P3 | 0.7792802  | 1.1231629  | 1.0260911  | 1.0250323  |                            |
| DM09444P1 | 0.77930045 | 1.0632823  | -1.1695461 | -1.1315095 |                            |
| DM09255P3 | 0.7793978  | 1.1443937  | 1.1155618  | -1.0655769 |                            |
| DM07976P4 | 0.7797184  | 1.1010593  | 1.0093293  | 1.3515545  |                            |
| DM08838P1 | 0.7799835  | 1.0457759  | -1.1158127 | 1.0194757  |                            |
| DM09284P2 | 0.78091574 | -1.0682559 | 1.0379648  | -1.2695451 |                            |
| DM00877P1 | 0.7809733  | 1.0083488  | -1.0290896 | 1.044258   | LOC1002323 XM_002197276.1  |
| DM00181P2 | 0.7813096  | -1.0191165 | 1.036033   | 1.0294749  | ISCW_ISCWC XM_002408890.1  |
| DM02357P1 | 0.781876   | 1.0839807  | 1.0650258  | 1.0763773  | NDUFV1 XM_533212.2         |
| DM02012P1 | 0.78188664 | -1.0442305 | -1.0328476 | 1.021526   |                            |
| DM07226P1 | 0.78189427 | 1.0569501  | 1.1432563  | 1.1915362  |                            |
| DM09523P4 | 0.78219885 | -1.0977545 | -1.0174413 | -1.1078027 |                            |
| DM09899P4 | 0.7823669  | 1.0025648  | 1.1498652  | 1.1641929  |                            |
| DM09326P1 | 0.7826497  | 1.464075   | 1.3308932  | 1.4894898  |                            |
| DM09931P2 | 0.7826715  | 1.088049   | 1.3538433  | 1.0216422  |                            |
| DM09810P3 | 0.78281236 | 1.1312072  | -1.0220566 | 1.1009496  |                            |
| DM06468P1 | 0.7829277  | 1.1282619  | 1.2726679  | 1.2479426  |                            |
| DM03159P3 | 0.7830184  | 1.178117   | -1.0068126 | -1.0132948 | DWIL\GK247\ XM_002066926.1 |
| DM00786P1 | 0.7833711  | -1.0657262 | 1.0118877  | -1.0264899 |                            |
| DM13666P1 | 0.7833757  | 1.2554348  | -1.0418786 | 1.1711248  |                            |
| DM04331P2 | 0.7834641  | 1.0300274  | -1.0148361 | -1.0216835 |                            |
| DM00472P2 | 0.7834889  | -1.0267351 | -1.0673065 | -1.0975701 | LOC1001168\ XM_001607793.1 |
| DM08859P3 | 0.78352594 | 1.0529557  | -1.1178375 | -1.0000875 |                            |
| DM03820P1 | 0.783529   | 1.0676646  | 1.0226939  | 1.1726103  | LOC1001681\ XM_001950711.1 |
| DM00615P3 | 0.7835317  | -1.0367306 | 1.1051604  | 1.0056169  | TRIADDRAFT XM_002117600.1  |
| DM14804P1 | 0.7836075  | -1.1693423 | -1.2937868 | -1.1046184 |                            |
| DM11083P2 | 0.78362954 | -1.0884796 | -1.0958573 | -1.0691662 |                            |
| DM00977P1 | 0.7836625  | -1.0462244 | -1.0767537 | 1.046107   |                            |
| DM03521P2 | 0.7837707  | -1.3937924 | -1.1641879 | -1.2958522 |                            |
| DM14418P3 | 0.78393435 | -1.2168705 | -1.2627857 | -1.2299846 |                            |
| DM11094P3 | 0.7844213  | 1.0247494  | -1.1545062 | 1.0725223  |                            |
| DM08388P1 | 0.7844768  | -1.0865834 | 1.056165   | -1.1036581 |                            |
| DM09128P1 | 0.7845556  | -1.0150458 | -1.1160693 | -1.0827689 |                            |
| DM12710P1 | 0.7846019  | -1.0430132 | -1.0665942 | -1.1231458 |                            |
| DM09999P2 | 0.78486264 | 1.0052117  | -1.2011186 | -1.0443741 |                            |
| DM13260P2 | 0.78489256 | 1.1356276  | 1.0782249  | -1.0265878 |                            |
| DM14605P1 | 0.7850217  | -1.1695307 | -1.2029654 | -1.2002997 |                            |
| DM13239P3 | 0.785291   | -1.1127132 | 1.106127   | -1.1354016 |                            |
| DM12606P1 | 0.78529584 | 1.1211511  | 1.0947521  | 1.0509306  |                            |
| DM11502P1 | 0.78533155 | -1.0590559 | -1.1834332 | 1.156369   |                            |
| DM06955P2 | 0.7854192  | 1.1257827  | 1.1571478  | 1.2333685  | DANA\GF235 XM_001958394.1  |
| DM04744P1 | 0.7856543  | 1.0051416  | -1.0484599 | -1.1161289 |                            |

|           |            |            |            |            |             |                |
|-----------|------------|------------|------------|------------|-------------|----------------|
| DM06146P2 | 0.7856837  | -1.0621994 | 1.0365007  | 1.0819415  |             |                |
| DM09094P2 | 0.78572065 | 1.1152606  | -1.0477061 | 1.1639861  |             |                |
| DM09738P3 | 0.786145   | 1.0788909  | -1.0819596 | 1.0417087  |             |                |
| DM06377P1 | 0.78615004 | -1.0699183 | -1.0735956 | 1.0039867  |             |                |
| DM11128P2 | 0.78625107 | -1.0200018 | -1.0676551 | -1.2242748 |             |                |
| DM15135P1 | 0.7863945  | 1.1057078  | 1.0081385  | 1.131577   |             |                |
| DM00401P1 | 0.7864104  | 1.0141541  | 1.0179151  | 1.1226774  | SF4         | NM_001011920.1 |
| DM14484P3 | 0.78644663 | -1.1444244 | -1.0976568 | -1.0253319 |             |                |
| DM06816P3 | 0.7864502  | -1.3253647 | -1.0601548 | -1.0523862 |             |                |
| DM02149P1 | 0.7864651  | -1.0640105 | -1.143923  | -1.0355352 | BRAFLDRAFT  | XM_002605928.1 |
| DM13232P3 | 0.7866287  | 1.1437907  | 1.2917858  | 1.3141531  |             |                |
| DM02929P1 | 0.78668475 | -1.0815613 | 1.0375801  | 1.1981052  | SULT        | XM_001651869.1 |
| DM01240P1 | 0.78683317 | -1.0261883 | 1.0521439  | 1.1032743  | BRAFLDRAFT  | XM_002589038.1 |
| DM04532P3 | 0.78683895 | 1.1494149  | -1.0307605 | -1.0891694 |             |                |
| DM03107P2 | 0.78688204 | -1.0293779 | 1.2589395  | 1.0001973  |             |                |
| DM04467P2 | 0.7869208  | -1.0320917 | -1.1547269 | -1.0123572 | LOC1000850  | XM_001515383.1 |
| DM13768P4 | 0.7870915  | -1.0962572 | -1.0147707 | -1.0555665 |             |                |
| DM13598P2 | 0.7873726  | -1.089024  | 1.1349283  | 1.0569257  |             |                |
| DM03652P1 | 0.7873736  | -1.0032345 | -1.2131596 | 1.0445962  |             |                |
| DM09843P3 | 0.78747946 | 1.0769036  | -1.0046469 | -1.0382026 |             |                |
| DM02883P3 | 0.78758204 | 1.0063276  | -1.0649078 | -1.0621724 |             |                |
| DM10306P1 | 0.7877211  | -1.1111102 | -1.2275943 | -1.0104777 |             |                |
| DM08356P2 | 0.78774995 | -1.0797558 | 1.0452179  | -1.046409  |             |                |
| DM00057P3 | 0.7877505  | 1.0210742  | 1.097688   | 1.0068933  | DVIR\GJ1421 | XM_002051026.1 |
| DM09730P2 | 0.78777176 | -1.0079623 | 1.1101706  | 1.0526323  |             |                |
| DM00944P3 | 0.7879781  | 1.28189    | 1.0892203  | 1.0640196  |             |                |
| DM13558P1 | 0.7883562  | -1.0652738 | 1.0540506  | 1.0526477  | DMOJ\GI1647 | XM_002011306.1 |
| DM10445P3 | 0.78846127 | 1.0031493  | -1.0482093 | 1.1280501  |             |                |
| DM12926P1 | 0.78846586 | 1.3348925  | 1.223757   | 1.2785687  |             |                |
| DM10720P2 | 0.78851116 | 1.1807938  | 1.1696049  | 1.1092421  |             |                |
| DM13660P3 | 0.788518   | -1.0050768 | -1.0565511 | 1.0901824  |             |                |
| DM13370P1 | 0.78859425 | 1.0771838  | -1.091589  | 1.0245886  |             |                |
| DM03109P4 | 0.7886705  | 1.1406453  | -1.0480795 | 1.1070044  |             |                |
| DM04104P2 | 0.7887188  | -1.063511  | -1.0744101 | -1.0379627 |             |                |
| DM04859P3 | 0.7889209  | 1.0936085  | 1.0414597  | 1.0887877  |             |                |
| DM06036P1 | 0.78908193 | -1.1184924 | -1.1236053 | -1.0985094 |             |                |
| DM13186P1 | 0.78921586 | 1.0758903  | -1.3912252 | -1.0220282 |             |                |
| DM11289P1 | 0.78933537 | -1.0489572 | -1.0803416 | 1.0613234  | PRPF40A     | NM_017892.3    |
| DM12265P1 | 0.7895455  | -1.02476   | 1.0540258  | 1.1044501  |             |                |
| DM05123P1 | 0.7895754  | 1.1355041  | -1.1149102 | 1.2063869  |             |                |
| DM11889P2 | 0.78968984 | -1.0217763 | 1.0140706  | -1.0441844 |             |                |
| DM10718P2 | 0.78975713 | -1.1311907 | -1.1690491 | -1.2127419 |             |                |
| DM14584P3 | 0.7897764  | 1.0324335  | -1.1393954 | 1.0550615  |             |                |
| DM14630P3 | 0.790465   | -1.0193549 | -1.1363963 | 1.1321102  |             |                |
| DM04133P1 | 0.7905333  | -1.0370868 | 1.1162897  | 1.2425346  | LOC1000278  | XM_001378019.1 |
| DM15206P2 | 0.79090166 | 1.0823513  | -1.0020121 | 1.07507    |             |                |
| DM01231P3 | 0.79098773 | -1.0731671 | 1.0562122  | 1.1639199  | SI          | XM_545265.2    |
| DM00822P3 | 0.7913183  | -1.091178  | -1.1077852 | -1.0546558 | LOC1000844  | XM_001514612.1 |
| DM10944P1 | 0.7915     | 1.0354428  | 1.0985185  | 1.0765505  |             |                |
| DM01626P2 | 0.7915094  | 1.0016901  | -1.0314232 | -1.0326256 | TKT         | XM_001649091.1 |

|           |            |            |            |            |             |                |
|-----------|------------|------------|------------|------------|-------------|----------------|
| DM05443P2 | 0.79153824 | 1.0832424  | -1.1092162 | -1.1170853 |             |                |
| DM13439P2 | 0.79168373 | -1.0382754 | 1.1133765  | 1.0021411  |             |                |
| DM02742P1 | 0.7919171  | -1.0028306 | -1.164431  | 1.0523788  | LOC1000314: | XM_001380652.1 |
| DM08099P1 | 0.7920583  | 1.0587777  | 1.1535869  | 1.0342548  |             |                |
| DM05047P1 | 0.792094   | -1.0234333 | -1.0321512 | -1.1632818 |             |                |
| DM03392P2 | 0.7920975  | -1.1063342 | -1.0426875 | -1.0040648 |             |                |
| DM09683P3 | 0.79221344 | 1.0633395  | -1.0267034 | 1.1142002  |             |                |
| DM13948P3 | 0.79223496 | 1.0091408  | -1.1594205 | -1.2015435 |             |                |
| DM06339P1 | 0.79225266 | 1.0074921  | -1.0931343 | 1.3143224  |             |                |
| DM03907P1 | 0.7923607  | 1.0548022  | -1.0688173 | -1.1011069 |             |                |
| DM06363P1 | 0.79240626 | -1.0016339 | 1.0518708  | -1.0794454 | NOLC1       | NM_022869.1    |
| DM14722P1 | 0.7924278  | -1.065092  | -1.0991595 | 1.0690756  |             |                |
| DM07049P2 | 0.792428   | -1.3418487 | -1.0971082 | -1.1297003 |             |                |
| DM04195P1 | 0.7925887  | 1.0151964  | 1.2797202  | 1.1441594  | HECTD2      | XM_423375.2    |
| DM05148P1 | 0.7926171  | 1.127274   | 1.1389898  | 1.2475847  |             |                |
| DM15311P1 | 0.7927307  | -1.1072148 | -1.0808784 | -1.1637328 |             |                |
| DM07700P1 | 0.7929764  | -1.211669  | -1.4141641 | -1.2072942 |             |                |
| DM07454P4 | 0.7929918  | 1.2377776  | 1.1613147  | -1.0300902 |             |                |
| DM07798P1 | 0.7930237  | -1.0393103 | -1.111456  | 1.0234164  |             |                |
| DM10034P3 | 0.79321146 | -1.0407903 | 1.1323208  | -1.0379878 |             |                |
| DM02817P2 | 0.7932603  | 1.3934774  | -1.4083996 | -1.3091674 | BRAFLDRAFT  | XM_002612931.1 |
| DM04090P4 | 0.7933954  | -1.1149936 | -1.0534124 | -1.0125784 |             |                |
| DM04982P1 | 0.7934303  | -1.226556  | -1.1732281 | -1.2364792 |             |                |
| DM02463P2 | 0.7938045  | -1.0557873 | 1.0865796  | 1.0881668  | ANXB10B     | XM_310251.5    |
| DM14169P1 | 0.79381967 | -1.071246  | -1.2857155 | 1.197325   |             |                |
| DM12358P1 | 0.79395986 | -1.1360624 | 1.0662915  | 1.2231944  |             |                |
| DM07276P3 | 0.79404634 | 1.043831   | 1.0514878  | 1.0319252  |             |                |
| DM10353P2 | 0.7944582  | 1.0549766  | 1.0213166  | 1.1346256  |             |                |
| DM14710P3 | 0.794461   | -1.2012553 | 1.0312383  | 1.0068403  |             |                |
| DM05435P1 | 0.7945323  | -1.1398717 | 1.0790083  | -1.1601604 | CP72        | NM_001172257.1 |
| DM04110P2 | 0.79459125 | -1.1645058 | -1.0449268 | -1.0533041 | DWIL\GK208  | XM_002061280.1 |
| DM05839P2 | 0.7948083  | 1.0627822  | -1.0482299 | 1.0454034  | DANA\GF219  | XM_001966426.1 |
| DM08446P1 | 0.79482627 | -1.1155015 | -1.0716146 | -1.0707192 | RPL41       | NM_001042449.1 |
| DM08235P3 | 0.79484975 | -1.0091577 | 1.0607319  | 1.0746373  |             |                |
| DM08970P4 | 0.794891   | -1.1804072 | -1.1972185 | -1.1558949 |             |                |
| DM05089P3 | 0.79489326 | 1.0765047  | 1.1535403  | -1.0609136 |             |                |
| DM08276P1 | 0.79504555 | -1.0442839 | -1.0119685 | -1.0523727 |             |                |
| DM05267P3 | 0.79514873 | -1.0900826 | 1.0247142  | 1.0911387  |             |                |
| DM02274P1 | 0.7953149  | 1.1083957  | 1.4769189  | 1.0396037  | LOC1001657  | NM_001134286.1 |
| DM11198P3 | 0.79540193 | -1.2385125 | 1.0081124  | -1.1200124 | NACHRA5     | NM_001162522.1 |
| DM05640P2 | 0.79558605 | 1.1713271  | 1.0085038  | -1.0070534 |             |                |
| DM11773P1 | 0.795758   | -1.0253056 | -1.0856056 | -1.1075243 |             |                |
| DM13413P1 | 0.795796   | 1.0325019  | -1.0884544 | -1.0508659 |             |                |
| DM11302P2 | 0.7958205  | -1.0714054 | -1.050074  | -1.1041903 |             |                |
| DM04598P1 | 0.79610527 | 1.0510076  | 1.1805799  | 1.1706281  |             |                |
| DM02308P2 | 0.7961303  | -1.0045047 | 1.0954695  | 1.0737735  | DHPR        | XM_392684.3    |
| DM08728P4 | 0.7962608  | 1.0386912  | 1.2503875  | 1.1158651  |             |                |
| DM07266P3 | 0.79635936 | 1.1701579  | 1.1075101  | 1.1001201  |             |                |
| DM01481P1 | 0.7963632  | 1.0861088  | 1.1361457  | 1.1074337  | DGRI\GH169  | XM_001985165.1 |
| DM05906P1 | 0.79644537 | 1.0761398  | 1.0704982  | 1.0254202  | DGRI\GH211  | XM_001985933.1 |

|           |            |            |            |            |              |                |
|-----------|------------|------------|------------|------------|--------------|----------------|
| DM00349P2 | 0.7965422  | 1.0013167  | 1.0080378  | -1.062566  | FUR1         | XM_001121308.1 |
| DM00400P3 | 0.79655254 | 1.032143   | -1.1103811 | -1.0239197 | LOC1000199   | XM_001372623.1 |
| DM01191P2 | 0.7966115  | -1.0990348 | -1.2340744 | -1.1455048 | LOC552114    | XM_624494.2    |
| DM01850P1 | 0.7966954  | -1.1279708 | -1.1484756 | -1.1516681 |              |                |
| DM14232P1 | 0.7967814  | 1.0337118  | 1.05162    | -1.034036  |              |                |
| DM04965P2 | 0.79680896 | 1.0406471  | 1.1482407  | 1.2093248  |              |                |
| DM12882P3 | 0.7969829  | 1.0507234  | 1.0775868  | -1.0911694 |              |                |
| DM13257P4 | 0.7970858  | -1.0210351 | -1.1102536 | -1.1815016 |              |                |
| DM07990P2 | 0.7970929  | -1.1085541 | -1.1190569 | 1.0609454  |              |                |
| DM04407P2 | 0.7971581  | 1.0609213  | 1.1243353  | -1.0232146 |              |                |
| DM11659P1 | 0.79720515 | -1.0273935 | -1.0619812 | -1.1065305 |              |                |
| DM12840P2 | 0.79724765 | 1.0164152  | -1.0569007 | 1.2334433  |              |                |
| DM11087P3 | 0.797284   | -1.0077212 | -1.1887355 | 1.0562582  |              |                |
| DM03541P4 | 0.79743624 | -1.2817736 | -1.3184997 | -1.1458216 | LOC1001635   | XM_001945413.1 |
| DM14879P3 | 0.79766095 | -1.1349921 | -1.040904  | 1.1609154  |              |                |
| DM01305P3 | 0.79779875 | 1.0391995  | -1.0506    | 1.0750352  | LOC661732    | XM_967878.1    |
| DM04905P2 | 0.7979304  | -1.0249758 | -1.1000392 | -1.1196601 |              |                |
| DM00329P3 | 0.7979489  | -1.0293393 | 1.0182707  | 1.047164   | CPIPJ_CPIJ01 | XM_001863973.1 |
| DM07399P3 | 0.7979886  | 1.4516828  | 1.2878274  | 1.1769868  |              |                |
| DM03793P2 | 0.7981688  | -1.1491436 | -1.457953  | 1.0241487  | ENPP3        | NM_019370.2    |
| DM03561P3 | 0.7982292  | -1.0408746 | -1.0515192 | -1.0467138 | AGAP_AGAP0   | XM_314554.2    |
| DM06652P1 | 0.7982449  | -1.0670198 | 1.0735003  | -1.084323  |              |                |
| DM06526P2 | 0.79865766 | 1.2334665  | 1.1546034  | 1.4097782  |              |                |
| DM10781P1 | 0.79909587 | -1.139352  | -1.1542726 | -1.2210001 |              |                |
| DM14372P1 | 0.799315   | -1.14434   | 1.0567611  | -1.0696356 |              |                |
| DM03636P1 | 0.7994074  | 1.0136095  | 1.0059782  | -1.1824222 |              |                |
| DM00753P2 | 0.79941326 | 1.055511   | 1.086098   | -1.0662841 | AT5G58420    | NM_125228.3    |
| DM00986P4 | 0.7995138  | -1.0708606 | -1.0595965 | -1.0100511 | LOC1001597   | XM_001947081.1 |
| DM03059P3 | 0.7995904  | -1.0728751 | -1.0725423 | 1.1063368  | BRAFLDRAFT   | XM_002612943.1 |
| DM12931P1 | 0.7999103  | 1.0932262  | 1.1859561  | 1.0660356  | BTBD3        | NM_001094831.1 |
| DM02562P1 | 0.7999858  | -1.0048932 | 1.1274586  | -1.004143  | DERE\GG242   | XM_001979324.1 |
| DM04576P3 | 0.8001445  | -1.1293402 | -1.0996    | -1.0068319 | PF14_0123    | XM_001348260.1 |
| DM07126P3 | 0.80020314 | 1.1850777  | 1.2554457  | 1.0599531  |              |                |
| DM12786P2 | 0.80075157 | 1.0547664  | 1.0647086  | -1.073431  |              |                |
| DM06368P1 | 0.8009499  | -1.2788914 | 1.1287929  | 1.110096   |              |                |
| DM09731P3 | 0.80104107 | -1.0198959 | 1.0830932  | 1.1997421  |              |                |
| DM04445P1 | 0.8011861  | 1.0457058  | 1.0510112  | 1.058248   | LOC1001986   | XM_002166820.1 |
| DM15108P4 | 0.80137676 | -1.1443547 | -1.0907168 | -1.0850481 |              |                |
| DM03019P1 | 0.80151415 | 1.112739   | 1.1484611  | 1.0126475  | DMOJ\GI195   | XM_002004470.1 |
| DM14238P3 | 0.80152124 | -1.0911295 | 1.0106815  | -1.0405279 |              |                |
| DM09174P3 | 0.8017589  | -1.0656697 | -1.0170013 | -1.0605779 |              |                |
| DM12831P2 | 0.80178136 | 1.2111171  | 1.3172687  | 1.3567467  |              |                |
| DM02367P3 | 0.80199474 | 1.0149285  | 1.0063075  | 1.1637346  |              |                |
| DM02671P2 | 0.8021642  | 1.0123242  | -1.0135125 | -1.1151352 | BRAFLDRAFT   | XM_002596679.1 |
| DM06584P2 | 0.802168   | 1.1491675  | 1.0482259  | 1.210159   |              |                |
| DM11804P3 | 0.8022372  | -1.0343664 | 1.0517926  | 1.0368205  |              |                |
| DM12361P3 | 0.80227304 | -1.075886  | -1.1137942 | -1.0247965 |              |                |
| DM00607P3 | 0.8024602  | 1.0024761  | -1.0168381 | -1.0814991 | AGAP_AGAP0   | XM_317149.4    |
| DM02569P3 | 0.8025894  | -1.0611768 | 1.0437572  | -1.0170081 | LOC758022    | XM_001180085.1 |
| DM12843P4 | 0.8029952  | -1.0708869 | -1.0859543 | -1.1128376 |              |                |

|           |            |            |            |            |                           |
|-----------|------------|------------|------------|------------|---------------------------|
| DM15184P1 | 0.8030404  | -1.0329076 | 1.1857764  | 1.0042052  |                           |
| DM15123P2 | 0.80323553 | 1.1363364  | -1.133665  | 1.0371488  |                           |
| DM10028P1 | 0.8032373  | 1.0314151  | 1.1481005  | 1.2039015  |                           |
| DM00659P4 | 0.8032507  | 1.0623167  | 1.0993171  | -1.0083152 |                           |
| DM14827P2 | 0.8033209  | 1.0837356  | -1.0769929 | -1.0113297 |                           |
| DM05162P4 | 0.8034607  | 1.0703366  | 1.0600787  | -1.0758332 |                           |
| DM10431P3 | 0.803569   | 1.166389   | -1.1056435 | -1.1518272 |                           |
| DM11095P1 | 0.80372703 | 1.1503298  | 1.1523079  | 1.0623109  |                           |
| DM11612P3 | 0.803752   | -1.1098032 | -1.0626471 | 1.0047603  |                           |
| DM00366P2 | 0.8038098  | 1.0791124  | 1.0000904  | 1.1024517  | LOC1001601:XM_001952568.1 |
| DM12925P4 | 0.80406904 | -1.0010631 | 1.131708   | -1.0312836 |                           |
| DM03592P2 | 0.8040748  | 1.0098937  | 1.0353453  | 1.0418946  | ISCW_ISCWC XM_002401289.1 |
| DM12994P2 | 0.8042066  | -1.0366062 | 1.0321914  | -1.0194393 |                           |
| DM05269P2 | 0.8042886  | 1.2346597  | 1.0730046  | 1.0328196  |                           |
| DM02808P3 | 0.80429244 | -1.0770327 | -1.0197501 | 1.0510495  | NEMVEDRAFT XM_001617996.1 |
| DM14099P2 | 0.8043593  | -1.0465972 | 1.2392566  | -1.0440848 |                           |
| DM02058P1 | 0.804596   | 1.1284854  | -1.0966662 | 1.0707949  |                           |
| DM05178P2 | 0.8047371  | -1.2498538 | -1.1706898 | -1.203391  |                           |
| DM14907P2 | 0.80496013 | 1.0283256  | 1.1084607  | 1.0574061  |                           |
| DM11592P4 | 0.8049617  | 1.200392   | 1.0499938  | 1.0024488  |                           |
| DM12117P3 | 0.8050028  | -1.1373044 | -1.0821546 | -1.0152256 |                           |
| DM13922P3 | 0.8051161  | 1.1354663  | -1.0692874 | 1.045808   |                           |
| DM04789P3 | 0.80522937 | 1.1114563  | 1.0536505  | -1.0122162 |                           |
| DM14850P2 | 0.8052675  | -1.0183738 | 1.0550809  | -1.018587  | LOC1001201(XM_001606378.1 |
| DM15154P4 | 0.80534494 | 1.001614   | 1.0450336  | -1.0324858 |                           |
| DM06252P1 | 0.8056656  | -1.073838  | 1.212103   | 1.0014081  | ISCW_ISCWC XM_002410968.1 |
| DM10857P3 | 0.80571306 | 1.0278684  | 1.0456941  | 1.071656   |                           |
| DM10915P1 | 0.8059169  | 1.0934305  | 1.3381138  | -1.034961  |                           |
| DM12759P2 | 0.80592823 | -1.0368096 | -1.3018844 | -1.0522411 |                           |
| DM05923P2 | 0.80615604 | 1.0076572  | -1.0252047 | -1.0598216 | BRAFLDRAFT_XM_002607050.1 |
| DM04181P1 | 0.806324   | -1.150351  | -1.4225656 | -1.1301208 | CPR127 XM_310772.4        |
| DM10916P4 | 0.80641586 | -1.1545767 | 1.0166324  | -1.1114914 |                           |
| DM13234P1 | 0.8065122  | 1.0527743  | -1.0127228 | -1.0160007 |                           |
| DM03249P1 | 0.80661607 | -1.0238233 | -1.0544564 | -1.0086782 |                           |
| DM00879P2 | 0.8068083  | 1.0376911  | 1.0422364  | 1.0448198  | LOC733058 NM_001044149.1  |
| DM06150P3 | 0.8069944  | -1.238244  | -1.0936799 | 1.2627716  |                           |
| DM06185P2 | 0.80701935 | -1.0653249 | -1.0205214 | -1.0393842 | LOC654934 XM_961375.1     |
| DM09207P1 | 0.8070809  | -1.0513443 | 1.0151848  | 1.0175323  |                           |
| DM01585P2 | 0.8072713  | 1.0358902  | 1.0738673  | 1.041049   | LOC1001648'XM_001948676.1 |
| DM01537P4 | 0.80729324 | -1.0149707 | -1.2293743 | -1.0941675 | DPSE\GA208'XM_001360658.2 |
| DM14108P1 | 0.8073487  | 1.0724051  | 1.0689626  | 1.0212691  |                           |
| DM05229P3 | 0.8073492  | -1.1510844 | 1.0393803  | -1.182147  |                           |
| DM04707P2 | 0.8076059  | -1.0162616 | 1.2236453  | 1.0839856  |                           |
| DM06428P3 | 0.8076755  | 1.0146551  | -1.0352017 | 1.1245834  |                           |
| DM11167P2 | 0.80776376 | 1.0131515  | 1.0749277  | -1.0468537 |                           |
| DM06886P3 | 0.8078341  | -1.2430606 | -1.0751941 | -1.0273935 |                           |
| DM07008P1 | 0.8081588  | -1.1113267 | -1.0628275 | -1.427103  |                           |
| DM15243P1 | 0.80818045 | -1.038468  | -1.0963722 | -1.0419205 |                           |
| DM10094P1 | 0.8081971  | 1.0929837  | 1.0600652  | -1.086145  |                           |
| DM12404P1 | 0.80835116 | -1.129377  | -1.0523847 | -1.3152186 |                           |

|           |            |            |            |            |             |                |
|-----------|------------|------------|------------|------------|-------------|----------------|
| DM08426P3 | 0.80837053 | -1.1036825 | -1.2117691 | 1.0978628  | KRT5        | NM_001006715.1 |
| DM09303P2 | 0.8085079  | 1.1312907  | 1.1954461  | 1.1380824  |             |                |
| DM07208P1 | 0.80857575 | -1.0537411 | -1.1242337 | -1.0403451 |             |                |
| DM00545P1 | 0.808673   | 1.0295372  | 1.0954984  | -1.0077052 | LDLR        | NM_001146722.1 |
| DM01438P1 | 0.80876577 | -1.1506412 | -1.1762404 | -1.0403591 | DPER\GL130  | XM_002022438.1 |
| DM03734P1 | 0.80885905 | 1.1040944  | 1.131239   | 1.0538001  | AGL         | XM_422317.2    |
| DM13742P1 | 0.8089785  | -1.0448183 | -1.320827  | -1.0075867 |             |                |
| DM14782P1 | 0.80936307 | -1.1053438 | -1.2204139 | 1.0326473  | LOC1000711  | XM_001918189.1 |
| DM13907P2 | 0.80949765 | -1.167949  | -1.380099  | -1.2332354 |             |                |
| DM12746P3 | 0.80971736 | 1.1352259  | 1.1790096  | 1.1869726  |             |                |
| DM11240P1 | 0.809733   | -1.0495344 | 1.0663456  | 1.0814418  |             |                |
| DM10528P4 | 0.80998546 | -1.0309123 | -1.1263064 | -1.0304602 |             |                |
| DM12354P4 | 0.8100545  | 1.0400945  | 1.1709383  | 1.2487365  |             |                |
| DM03401P3 | 0.8101709  | 1.0068144  | -1.0594074 | -1.0310628 | STAT92E-LIK | XM_397181.3    |
| DM01019P1 | 0.81018347 | -1.1350081 | -1.2987809 | -1.2631652 | LOC1000842  | XM_001514677.1 |
| DM01194P3 | 0.8101966  | 1.1430628  | -1.0110376 | -1.0112965 |             |                |
| DM08102P3 | 0.81020314 | -1.3017819 | -1.1140182 | -1.250069  |             |                |
| DM12168P3 | 0.810245   | -1.006932  | 1.0963051  | 1.172979   |             |                |
| DM05250P2 | 0.8102543  | -1.0853864 | -1.0709732 | -1.1896595 |             |                |
| DM06052P3 | 0.81030947 | 1.0613478  | -1.0599786 | -1.0026813 |             |                |
| DM06850P1 | 0.810513   | 1.0210104  | -1.1166524 | 1.0541277  | AGAP_AGAP0  | XM_319309.4    |
| DM00201P3 | 0.81056815 | -1.0780933 | -1.123275  | 1.0043217  | DANA\GF123  | XM_001958757.1 |
| DM02587P2 | 0.81059587 | -1.063768  | -1.0614884 | -1.085946  | DMOJ\GI194  | XM_002004727.1 |
| DM11922P3 | 0.81060195 | -1.0138826 | 1.1396611  | -1.017452  | SF3B3       | NM_001159880.1 |
| DM07560P3 | 0.8108488  | -1.0145245 | -1.0647123 | 1.0559398  |             |                |
| DM13506P3 | 0.8109198  | -1.061921  | -1.0345445 | 1.0181117  |             |                |
| DM06295P3 | 0.81114525 | -1.0473273 | -1.0209239 | -1.0820588 | DYAK\GE104  | XM_002088910.1 |
| DM04775P1 | 0.8111664  | 1.0133699  | -1.0575048 | -1.1301684 |             |                |
| DM00719P1 | 0.8113215  | -1.0401435 | -1.1030883 | -1.0683267 | DMOJ\GI124  | XM_002007292.1 |
| DM08215P3 | 0.81138295 | -1.0457988 | -1.1066694 | -1.0713811 |             |                |
| DM11929P1 | 0.8115794  | 1.0253063  | -1.0630765 | -1.099485  |             |                |
| DM04692P2 | 0.81168866 | 1.0458667  | -1.0663464 | -1.0457672 |             |                |
| DM03550P3 | 0.81179994 | 1.0543249  | 1.0248888  | 1.0018466  | LOC727282   | XM_001122991.1 |
| DM14986P3 | 0.8119047  | 1.0873696  | -1.1536629 | 1.0693053  |             |                |
| DM01460P3 | 0.8120253  | -1.0326315 | 1.0975816  | 1.0535249  |             |                |
| DM14960P2 | 0.81206435 | 1.0549237  | -1.0404325 | -1.0657679 |             |                |
| DM06973P1 | 0.81208724 | 1.0992913  | 1.2422606  | -1.035975  | CP17        | NM_001172262.1 |
| DM09463P2 | 0.8121079  | -1.0842495 | 1.0860473  | -1.1330292 |             |                |
| DM12280P2 | 0.8122232  | -1.0406169 | -1.0468284 | -1.090294  |             |                |
| DM03463P1 | 0.8123587  | -1.0871294 | -1.2728128 | 1.0409712  | DGRI\GH140  | XM_001994762.1 |
| DM03644P3 | 0.8123587  | 1.0844628  | 1.305026   | 1.1485533  |             |                |
| DM02719P4 | 0.81240475 | -1.0874324 | -1.0309113 | -1.0154641 | LOC656921   | XM_963418.2    |
| DM07082P3 | 0.81310976 | 1.05395    | -1.0226053 | 1.113381   |             |                |
| DM11529P3 | 0.8131503  | 1.0780462  | 1.0650096  | 1.0216159  |             |                |
| DM03868P4 | 0.81325376 | 1.0886744  | 1.0699995  | 1.0223391  | NEMVEDRAFT  | XM_001635788.1 |
| DM05027P2 | 0.8133889  | 1.0447407  | 1.1155201  | 1.1299038  |             |                |
| DM15397P2 | 0.81343544 | 1.0995667  | -1.0423179 | -1.0113881 |             |                |
| DM15307P4 | 0.8134601  | 1.3298239  | 1.0059963  | -1.1374115 |             |                |
| DM03518P1 | 0.8139221  | 1.1394901  | 1.3780456  | 1.0794992  |             |                |
| DM05637P3 | 0.8140064  | -1.255153  | -1.124598  | 1.11877    |             |                |

|           |            |            |            |            |             |                 |
|-----------|------------|------------|------------|------------|-------------|-----------------|
| DM10686P3 | 0.8140079  | 1.2544775  | 1.43507    | 1.1562079  |             |                 |
| DM00836P2 | 0.81418097 | -1.1205024 | -1.4607674 | -1.0551285 | RAD50       | XM_001650518.1  |
| DM07376P1 | 0.8142509  | -1.1780007 | -1.1142416 | 1.051615   |             |                 |
| DM09933P3 | 0.81439507 | 1.0919484  | 1.1220138  | -1.0023001 |             |                 |
| DM15209P3 | 0.81443304 | -1.0836349 | -1.0980707 | -1.1536705 |             |                 |
| DM09396P3 | 0.8144559  | -1.0555338 | 1.0181475  | -1.0834312 |             |                 |
| DM11161P1 | 0.8145299  | 1.0536625  | -1.102424  | 1.0886022  |             |                 |
| DM04011P2 | 0.8146202  | -1.0096828 | 1.0138109  | -1.0308489 |             |                 |
| DM04697P3 | 0.81466424 | -1.1982588 | -1.1115507 | -1.0571935 |             |                 |
| DM08574P2 | 0.8147004  | -1.0175409 | -1.0612993 | 1.0105865  |             |                 |
| DM07964P1 | 0.81477815 | -1.0355144 | -1.2336771 | -1.0122025 |             |                 |
| DM02035P2 | 0.8148476  | 1.0740398  | 1.0104873  | -1.0108465 | AGXT2L1     | NM_001102865.1  |
| DM14870P3 | 0.81489867 | 1.1221597  | 1.0174273  | 1.2529135  |             |                 |
| DM13475P3 | 0.8149925  | -1.0509983 | -1.016402  | 1.1502321  |             |                 |
| DM10689P2 | 0.8152769  | 1.120692   | 1.1985254  | -1.0775082 |             |                 |
| DM09046P3 | 0.8153365  | -1.1456803 | -1.0725131 | -1.0392323 |             |                 |
| DM07116P2 | 0.8153428  | -1.1403672 | -1.0184742 | -1.1701635 | CG34220     | NM_001103783.1  |
| DM05066P3 | 0.8155027  | 1.0868278  | -1.0024992 | 1.0235044  |             |                 |
| DM08861P2 | 0.8155548  | 1.0455703  | 1.0740995  | -1.1034493 |             |                 |
| DM09066P2 | 0.81580144 | -1.1147773 | -1.1526994 | 1.0428587  |             |                 |
| DM06528P1 | 0.8158741  | 1.1828568  | 1.1983461  | 1.3821282  |             |                 |
| DM04340P3 | 0.81589526 | -1.4109535 | -1.1042669 | 1.065493   | LOC410520   | XM_393999.2     |
| DM11704P1 | 0.8158997  | 1.080975   | -1.1154996 | -1.0383878 |             |                 |
| DM09946P2 | 0.81607777 | -1.1883416 | -1.1801498 | -1.4564059 |             |                 |
| DM04309P1 | 0.81609136 | 1.0158013  | -1.1359203 | 1.0167468  |             |                 |
| DM09773P1 | 0.8164194  | -1.2244735 | -1.3830693 | -1.2107708 |             |                 |
| DM03176P1 | 0.81642467 | 1.0505935  | -1.0140687 | -1.1727982 |             |                 |
| DM01201P3 | 0.81656516 | -1.0080266 | 1.021915   | 1.0941035  | DPER\GL1792 | XM_002024751.1  |
| DM00495P1 | 0.8165966  | -1.0754302 | -1.1179781 | -1.049407  | LOC662173   | XM_968289.2     |
| DM03293P3 | 0.8166647  | 1.0089846  | -1.1293315 | 1.0082105  |             |                 |
| DM14393P2 | 0.8167911  | -1.0894598 | -1.08842   | 1.035199   |             |                 |
| DM00668P2 | 0.8168766  | -1.2803483 | -1.0552442 | -1.0552452 | ITPR        | XM_001649113.1  |
| DM00840P3 | 0.8168937  | -1.0548449 | -1.1243764 | -1.0719196 | DBT         | NM_001918.2     |
| DM06730P2 | 0.81694746 | -1.0116749 | 1.0122306  | 1.0047823  | CPR69       | NM_001099612.1  |
| DM11188P1 | 0.81709427 | -1.2164458 | 1.0327681  | -1.2272533 |             |                 |
| DM14041P1 | 0.8172018  | 1.1258687  | -1.0154594 | -1.0268775 |             |                 |
| DM13210P2 | 0.817388   | -1.0102912 | 1.0235206  | -1.1924963 |             |                 |
| DM08117P2 | 0.8177287  | -1.0873489 | -1.0685804 | 1.2109101  | CHLREDRAFT  | XM_001703726.1  |
| DM13818P4 | 0.8178099  | 1.147273   | 1.4133941  | 1.0682212  | CP20        | NM_001172243.1  |
| DM10223P1 | 0.81781614 | 1.28724    | 1.3483186  | 1.0887212  |             |                 |
| DM01733P3 | 0.81798947 | 1.0858184  | 1.0455072  | -1.0534173 | LOC1001682  | (XM_001950957.1 |
| DM04914P3 | 0.81803393 | -1.1132103 | -1.2799376 | -1.09744   |             |                 |
| DM11163P3 | 0.8180405  | 1.0029545  | 1.0463091  | -1.051998  |             |                 |
| DM08264P1 | 0.8182236  | -1.2349259 | -1.182441  | -1.0739883 |             |                 |
| DM14278P4 | 0.81832457 | 1.1133353  | 1.1392876  | 1.1070328  |             |                 |
| DM10303P3 | 0.8183673  | 1.1032157  | -1.1457479 | 1.1321982  |             |                 |
| DM10758P2 | 0.8183964  | -1.064036  | 1.0814214  | 1.053681   |             |                 |
| DM04791P3 | 0.8188126  | -1.1160301 | -1.035187  | -1.0521743 | DVIR\GJ1386 | XM_002051105.1  |
| DM09102P1 | 0.8188206  | -1.0114388 | 1.0564855  | 1.020287   |             |                 |
| DM05928P1 | 0.81899893 | -1.0628685 | -1.2013716 | -1.0837253 | CHGG_00365  | XM_001219585.1  |



|           |            |            |            |            |             |                |
|-----------|------------|------------|------------|------------|-------------|----------------|
| DM13372P2 | 0.819011   | 1.1813287  | 1.1689168  | 1.240877   |             |                |
| DM14749P1 | 0.81952846 | 1.030166   | 1.1949944  | 1.0304097  |             |                |
| DM03562P2 | 0.819541   | 1.0690924  | 1.0132031  | 1.1229235  |             |                |
| DM14359P1 | 0.81982017 | 1.1760585  | 1.020903   | 1.0163     | CYP4AZ1     | XM_397272.3    |
| DM07101P2 | 0.8198583  | -1.0432847 | -1.0277259 | 1.0120932  |             |                |
| DM03674P2 | 0.8199279  | -1.0162799 | -1.1699687 | -1.2234267 | LOC10016450 | XM_001944125.1 |
| DM02142P2 | 0.8200014  | -1.07524   | 1.0422533  | 1.0115818  | AGAP_AGAP0  | XM_318007.4    |
| DM13437P2 | 0.820024   | -1.1311074 | -1.0876881 | -1.1616777 |             |                |
| DM04460P1 | 0.8201653  | -1.0739001 | 1.0417402  | 1.101856   |             |                |
| DM06273P1 | 0.82023484 | -1.1239307 | -1.0822228 | -1.2895931 |             |                |
| DM10068P4 | 0.82030183 | -1.018731  | 1.0666898  | 1.0371443  |             |                |
| DM00399P3 | 0.8204607  | -1.007421  | -1.0487988 | 1.017381   | LOC733045   | NM_001047037.1 |
| DM02092P1 | 0.8206991  | 1.0140065  | 1.1701852  | 1.0865692  | LOC413942   | XM_397379.3    |
| DM07612P2 | 0.8209104  | 1.0518411  | 1.105288   | 1.0538325  |             |                |
| DM13196P2 | 0.82094777 | 1.0837948  | 1.1351869  | 1.097132   |             |                |
| DM08904P1 | 0.8210183  | -1.3011407 | -1.1432188 | -1.3302683 |             |                |
| DM01292P3 | 0.8211254  | 1.0259138  | -1.0021138 | 1.0501801  | CRP3        | XM_385816.1    |
| DM14478P3 | 0.821152   | 1.0268862  | 1.2503339  | -1.1337599 |             |                |
| DM10194P3 | 0.82118934 | -1.3172158 | 1.0245641  | -1.2681115 | UNR         | XM_397449.2    |
| DM06669P1 | 0.82120264 | 1.0004734  | -1.0224661 | 1.0557754  | PB103351.00 | XM_666562.1    |
| DM05283P4 | 0.8216098  | -1.0378745 | 1.0323277  | -1.0680554 |             |                |
| DM03161P3 | 0.82172114 | -1.0540814 | -1.0268708 | -1.0102073 | LOC10017910 | XM_002128053.1 |
| DM06756P3 | 0.8217535  | -1.0604142 | -1.1260675 | -1.0871655 |             |                |
| DM15201P1 | 0.82181674 | -1.0378379 | -1.0267428 | 1.0703459  |             |                |
| DM08151P1 | 0.8219622  | 1.0206805  | 1.0754226  | -1.0025228 |             |                |
| DM04711P3 | 0.82202816 | -1.1094507 | 1.0759699  | -1.1525679 |             |                |
| DM04729P1 | 0.8221297  | -1.0714276 | 1.1138406  | 1.07012    |             |                |
| DM01085P1 | 0.8224005  | -1.1717333 | -1.1132995 | -1.0725427 | LOC10021170 | XM_002161491.1 |
| DM06317P3 | 0.8225141  | 1.1362205  | 1.0472754  | 1.1536205  |             |                |
| DM00723P3 | 0.8226801  | -1.0494426 | 1.0025735  | -1.0330445 | AAEL_AAEL00 | XM_001650449.1 |
| DM09453P3 | 0.8227282  | 1.02873    | -1.0195626 | -1.06772   |             |                |
| DM01725P2 | 0.8227964  | 1.1018945  | -1.008714  | -1.0222518 | DPER\GL2600 | XM_002018931.1 |
| DM05326P3 | 0.8228333  | -1.000142  | -1.1356597 | -1.1905768 |             |                |
| DM04563P3 | 0.8229105  | -1.0190679 | 1.0540323  | -1.0158932 |             |                |
| DM15152P2 | 0.82310426 | 1.032207   | -1.0875982 | -1.1099268 |             |                |
| DM09037P1 | 0.8231105  | -1.0965784 | -1.0534383 | -1.0377399 |             |                |
| DM08501P3 | 0.8232592  | 1.0477036  | 1.1786863  | 1.1710554  |             |                |
| DM04706P4 | 0.8234582  | 1.0677496  | 1.0569859  | -1.0469021 |             |                |
| DM13430P1 | 0.82346445 | -1.0629437 | -1.0762844 | 1.0195379  |             |                |
| DM04634P1 | 0.82363135 | 1.1040947  | -1.1010004 | 1.1884117  |             |                |
| DM01269P1 | 0.8238015  | 1.0705009  | -1.1084337 | 1.043072   |             |                |
| DM07815P1 | 0.82382405 | -1.008416  | 1.0065264  | 1.0620785  |             |                |
| DM03201P1 | 0.82424426 | -1.1463441 | -1.0008522 | -1.1605729 | LOC10021780 | XM_002191551.1 |
| DM08839P2 | 0.8243367  | 1.0188782  | 1.027433   | -1.0857651 |             |                |
| DM15017P1 | 0.824518   | -1.1102753 | -1.205376  | -1.1251378 |             |                |
| DM05509P1 | 0.82452756 | 1.2462612  | 1.2206492  | 1.1138455  |             |                |
| DM02413P3 | 0.8245957  | -1.0746895 | 1.071971   | -1.1743679 | LOC410487   | XM_393966.1    |
| DM14603P1 | 0.82463706 | -1.006509  | -1.0846022 | 1.0906918  |             |                |
| DM03536P1 | 0.8246408  | 1.0113392  | 1.0265275  | 1.1155204  | DVIR\GJ2049 | XM_002049865.1 |
| DM02617P4 | 0.8248374  | 1.0295612  | -1.0405387 | -1.0534321 | LOC10002570 | XM_001370741.1 |

|           |            |            |            |            |            |                |
|-----------|------------|------------|------------|------------|------------|----------------|
| DM07689P2 | 0.8248442  | 1.0276527  | 1.0019841  | 1.0054848  |            |                |
| DM07433P3 | 0.82485896 | 1.0888739  | 1.2292053  | 1.146811   |            |                |
| DM08645P1 | 0.8250668  | 1.0687311  | 1.0228096  | 1.1019113  |            |                |
| DM12873P2 | 0.8250811  | 1.0622503  | 1.0201706  | 1.0125587  |            |                |
| DM07422P1 | 0.8255413  | 1.2695223  | 1.1585711  | 1.0735892  |            |                |
| DM12177P1 | 0.82558817 | -1.1094102 | -1.0674976 | -1.1204726 |            |                |
| DM07651P1 | 0.8256828  | -1.049843  | -1.013576  | -1.0546428 |            |                |
| DM09216P3 | 0.8258413  | -1.1319695 | -1.0759082 | -1.0801355 |            |                |
| DM04319P1 | 0.825851   | 1.060499   | -1.133197  | -1.046622  |            |                |
| DM11871P1 | 0.8260398  | 1.1789906  | 1.3463213  | 1.0683796  |            |                |
| DM02004P1 | 0.8263882  | 1.04396    | 1.1137503  | 1.0849938  |            |                |
| DM11809P1 | 0.826395   | -1.0580689 | -1.0621856 | 1.0231076  |            |                |
| DM06380P2 | 0.8264673  | 1.0846484  | -1.0769544 | 1.0199006  |            |                |
| DM14042P3 | 0.82658565 | 1.0205201  | -1.0900049 | -1.1647046 |            |                |
| DM08788P2 | 0.82681185 | -1.0441145 | -1.3014923 | -1.0096902 |            |                |
| DM12296P2 | 0.82689697 | 1.1347328  | 1.1628599  | 1.0944185  |            |                |
| DM02699P1 | 0.8271964  | 1.0042319  | -1.0457041 | -1.012419  | PDH        | XM_001650646.1 |
| DM10153P3 | 0.82725024 | 1.0478593  | 1.097846   | 1.1402854  |            |                |
| DM14286P2 | 0.8273603  | -1.0179665 | -1.0831538 | 1.149198   |            |                |
| DM14919P3 | 0.8275914  | 1.1786948  | -1.0670364 | 1.4235609  |            |                |
| DM03485P3 | 0.82774323 | 1.0743402  | 1.0827248  | 1.1828849  |            |                |
| DM11640P2 | 0.82778776 | -1.0483956 | -1.0547354 | 1.0344901  |            |                |
| DM01081P3 | 0.82796055 | -1.1640332 | 1.1521204  | 1.2052226  | ADH        | XM_001848803.1 |
| DM12390P4 | 0.8279946  | 1.1852868  | 1.2161263  | 1.1544759  |            |                |
| DM04221P1 | 0.8283346  | 1.0673077  | -1.0921406 | -1.0432159 |            |                |
| DM11854P1 | 0.8283879  | -1.0240877 | 1.0149838  | -1.0526754 |            |                |
| DM06720P1 | 0.82839566 | -1.1556418 | -1.2029601 | -1.1522713 |            |                |
| DM11725P2 | 0.82856494 | -1.018707  | 1.0562309  | -1.0546454 |            |                |
| DM11082P3 | 0.8286242  | -1.0720149 | -1.0381252 | -1.1406766 |            |                |
| DM05212P4 | 0.82867044 | 1.0130049  | -1.0716352 | -1.16572   |            |                |
| DM05366P1 | 0.8287444  | 1.1504879  | -1.0285445 | 1.1606559  |            |                |
| DM00842P3 | 0.8288024  | -1.0058508 | 1.0897251  | -1.1201473 | LOC1000750 | XM_001506561.1 |
| DM13136P2 | 0.82888764 | -1.2600625 | -1.15443   | 1.1580676  |            |                |
| DM04656P1 | 0.8289119  | -1.116745  | -1.1811191 | -1.3232973 |            |                |
| DM09337P2 | 0.8289559  | -1.0207131 | 1.0589962  | 1.0547719  |            |                |
| DM13487P2 | 0.8289626  | -1.1702225 | -1.0057625 | -1.04425   |            |                |
| DM06251P3 | 0.82899636 | 1.0480199  | 1.0643343  | -1.0007424 |            |                |
| DM03326P3 | 0.8290319  | -1.0039779 | -1.075981  | -1.1166642 |            |                |
| DM12465P3 | 0.8291756  | 1.0555037  | 1.0492605  | 1.1580307  |            |                |
| DM12983P3 | 0.829334   | 1.1645148  | -1.0503776 | -1.0673443 |            |                |
| DM09742P3 | 0.8294032  | -1.1079267 | -1.0739756 | -1.1444993 |            |                |
| DM03134P1 | 0.8297246  | 1.0627298  | -1.0435088 | -1.0427864 | LOC1000148 | XM_001364386.1 |
| DM04698P3 | 0.82982427 | 1.1250516  | 1.2123245  | 1.2259338  |            |                |
| DM06479P2 | 0.829841   | 1.0881811  | 1.007479   | 1.0704044  |            |                |
| DM08019P3 | 0.83006585 | 1.1452453  | 1.0834488  | 1.182135   |            |                |
| DM10507P2 | 0.8300868  | 1.0013049  | -1.095757  | -1.1041192 |            |                |
| DM03156P4 | 0.8301925  | 1.0359719  | 1.0787953  | -1.0124565 |            |                |
| DM04468P1 | 0.8302275  | -1.026914  | 1.0061237  | 1.0257432  |            |                |
| DM04350P2 | 0.8303136  | -1.0632347 | -1.0986317 | 1.055829   | LOC1002158 | XM_002155162.1 |
| DM06718P2 | 0.83063555 | -1.1360656 | -1.0882918 | 1.0869464  |            |                |

|           |            |            |            |            |             |                |
|-----------|------------|------------|------------|------------|-------------|----------------|
| DM07254P1 | 0.830658   | -1.2210209 | -1.0405694 | -1.2098498 |             |                |
| DM13132P3 | 0.8306683  | -1.0062344 | -1.0142214 | -1.0879165 |             |                |
| DM07015P2 | 0.8306953  | 1.0307343  | 1.1395913  | 1.053028   |             |                |
| DM04475P3 | 0.83078915 | 1.0008836  | 1.0200967  | 1.1133491  |             |                |
| DM07380P2 | 0.8308229  | -1.2701436 | -1.1509404 | -1.2624769 |             |                |
| DM10711P3 | 0.8308246  | 1.0561855  | -1.0164609 | 1.0467004  |             |                |
| DM09376P2 | 0.8308803  | 1.054934   | -1.210266  | 1.0103227  |             |                |
| DM02113P1 | 0.83097816 | -1.1982313 | -1.0726278 | -1.0987684 | LOC655504   | XM_962058.2    |
| DM06085P3 | 0.8312735  | -1.1371723 | 1.0023363  | -1.0040799 | AAEL_AAEL0C | XM_001651899.1 |
| DM05655P1 | 0.8313774  | 1.062321   | -1.0756892 | -1.0431823 |             |                |
| DM13847P2 | 0.83155686 | 1.0868431  | -1.0578396 | 1.0423388  |             |                |
| DM15088P3 | 0.8315693  | -1.2020644 | -1.1639944 | 1.026332   |             |                |
| DM05382P1 | 0.83161026 | 1.190187   | 1.3151362  | 1.2051235  |             |                |
| DM03774P2 | 0.8316412  | -1.0790495 | -1.0459168 | 1.0361751  |             |                |
| DM08333P3 | 0.83198285 | 1.0346948  | -1.042744  | -1.075634  |             |                |
| DM11015P2 | 0.83205825 | -1.1395979 | -1.1109009 | 1.0655203  |             |                |
| DM09342P1 | 0.83210987 | 1.0834702  | 1.207656   | -1.0310334 |             |                |
| DM10527P1 | 0.83269095 | 1.1400883  | 1.0057083  | -1.1121281 |             |                |
| DM00051P2 | 0.83275956 | -1.0514996 | 1.3085291  | 1.0326033  | LOC663863   | XM_969894.2    |
| DM03395P1 | 0.83294535 | -1.1484654 | -1.0761136 | -1.1289623 |             |                |
| DM11609P1 | 0.8330334  | 1.0504941  | -1.0424166 | -1.0983722 |             |                |
| DM06792P1 | 0.83345485 | 1.0432479  | 1.0850928  | 1.1578109  |             |                |
| DM12106P2 | 0.8334795  | -1.0482434 | 1.2246361  | 1.2536789  |             |                |
| DM12481P1 | 0.83365154 | -1.2413577 | -1.088106  | -1.1904124 |             |                |
| DM05759P4 | 0.8336865  | 1.014669   | 1.0164964  | 1.1939461  |             |                |
| DM01767P3 | 0.8337518  | -1.0773389 | 1.0076413  | 1.016885   | AGAP_AGAP0  | XM_317733.3    |
| DM10664P3 | 0.83382136 | -1.0559679 | 1.0848914  | -1.1926168 |             |                |
| DM08302P4 | 0.83385074 | -1.0940229 | -1.0253246 | -1.0331842 |             |                |
| DM05134P2 | 0.8341643  | -1.1261448 | -1.0339137 | -1.1965996 |             |                |
| DM02008P1 | 0.8341915  | -1.0394661 | 1.0467198  | -1.0337864 | BRAFLDRAFT  | XM_002596679.1 |
| DM01039P4 | 0.8342441  | -1.1191977 | -1.1539431 | -1.028721  | MGC64526    | NM_001086455.1 |
| DM10466P2 | 0.83425754 | 1.0452309  | -1.029358  | -1.1349707 |             |                |
| DM00413P1 | 0.83448553 | -1.1214538 | 1.036329   | -1.0249897 | LOC1001845  | XM_002128105.1 |
| DM09605P2 | 0.834644   | 1.0180106  | -1.1118128 | -1.0529456 |             |                |
| DM10983P2 | 0.8347427  | 1.0307714  | -1.0759044 | -1.146954  |             |                |
| DM07327P3 | 0.83482665 | -1.0407113 | 1.0066531  | 1.0077018  |             |                |
| DM02444P4 | 0.83487976 | -1.066521  | -1.058958  | -1.0345414 | AP2B1       | NM_199919.2    |
| DM03855P1 | 0.83488023 | 1.0280601  | 1.010211   | 1.0654856  |             |                |
| DM00422P3 | 0.83495873 | -1.1508572 | -1.3212757 | 1.000382   | LOC1000116  | XM_001365597.1 |
| DM09285P3 | 0.83508426 | -1.0910642 | 1.0169113  | -1.0117402 |             |                |
| DM12415P1 | 0.8351087  | 1.0429751  | 1.0687083  | -1.0198059 |             |                |
| DM00583P1 | 0.835154   | -1.0802238 | -1.1165752 | -1.1924081 | CHIA        | XM_001857818.1 |
| DM14640P2 | 0.83534926 | -1.1547697 | -1.0353572 | 1.1383832  |             |                |
| DM08500P1 | 0.83545864 | -1.0147352 | -1.0330925 | -1.0339385 |             |                |
| DM02039P1 | 0.8354681  | 1.1464647  | 1.1723282  | -1.0342392 | LOC1002277  | XM_002196621.1 |
| DM12030P4 | 0.83576345 | -1.0669888 | -1.0030607 | 1.0085663  |             |                |
| DM03115P1 | 0.8357868  | 1.0410453  | -1.225372  | -1.0023708 |             |                |
| DM04681P3 | 0.835996   | -1.0013651 | 1.197953   | 1.2637886  |             |                |
| DM13447P1 | 0.8362086  | -1.0455971 | -1.009691  | 1.2744508  |             |                |
| DM10229P4 | 0.8363258  | 1.0913936  | 1.0613303  | 1.1156265  | LOC1001417  | XM_001807638.1 |

|           |            |            |            |            |             |                |
|-----------|------------|------------|------------|------------|-------------|----------------|
| DM13189P2 | 0.836345   | -1.0247773 | -1.0207425 | -1.1999291 |             |                |
| DM11913P2 | 0.8365601  | 1.0281812  | -1.0612767 | 1.1050959  |             |                |
| DM05579P3 | 0.83676463 | -1.151678  | -1.0605556 | -1.0419772 |             |                |
| DM07643P3 | 0.8367813  | -1.0059398 | 1.2656163  | 1.154867   |             |                |
| DM08519P3 | 0.8368684  | -1.022293  | -1.1766003 | -1.2182474 |             |                |
| DM10722P1 | 0.83690745 | -1.0042619 | -1.0019934 | -1.074783  |             |                |
| DM11742P1 | 0.8370047  | -1.0854275 | 1.2190791  | 1.141112   |             |                |
| DM02790P3 | 0.837055   | 1.0785831  | 1.0869743  | 1.0524412  | DNAJ-2      | NM_001046827.1 |
| DM09601P1 | 0.837405   | -1.1205071 | 1.1514002  | 1.1615673  |             |                |
| DM05431P3 | 0.8374436  | 1.0342195  | -1.047449  | -1.0124874 |             |                |
| DM06616P1 | 0.8375702  | 1.0288558  | -1.0245838 | 1.0225785  |             |                |
| DM08517P1 | 0.83786196 | -1.138923  | -1.377961  | 1.0014545  |             |                |
| DM03950P1 | 0.83800024 | 1.090413   | -1.1062121 | 1.1574725  |             |                |
| DM15290P1 | 0.83801436 | 1.0052518  | 1.121105   | 1.0840565  |             |                |
| DM14327P1 | 0.8380353  | -1.0335858 | 1.0443788  | -1.1044171 | DVIR\GJ1169 | XM_002047837.1 |
| DM01047P3 | 0.83831525 | -1.012956  | 1.0427948  | -1.0208886 | LOC551947   | XR_015104.1    |
| DM06773P1 | 0.838356   | -1.0420974 | 1.1128229  | -1.2348598 |             |                |
| DM12576P2 | 0.8385713  | 1.063622   | 1.2423304  | 1.1398863  |             |                |
| DM08200P3 | 0.83879477 | -1.0426929 | 1.1666746  | -1.049694  |             |                |
| DM12654P1 | 0.83885044 | -1.0055269 | 1.0240452  | 1.1056126  |             |                |
| DM08311P1 | 0.83886707 | -1.0085047 | 1.1068579  | 1.0152199  |             |                |
| DM12957P2 | 0.8388698  | -1.0918851 | -1.0102289 | -1.0369447 |             |                |
| DM04907P3 | 0.8389896  | -1.335866  | 1.1078641  | -1.1467538 |             |                |
| DM00642P2 | 0.83901024 | 1.0169687  | -1.0457003 | -1.0918492 | BLCAP-A     | NM_001171727.1 |
| DM07713P1 | 0.8391357  | 1.0596136  | 1.0879514  | 1.1596441  |             |                |
| DM10943P3 | 0.8391812  | -1.0725036 | 1.080637   | -1.0337442 |             |                |
| DM13511P2 | 0.83922315 | -1.0684755 | 1.0946919  | 1.1018407  |             |                |
| DM08408P1 | 0.8392875  | -1.0265207 | -1.4238003 | -1.2420493 |             |                |
| DM09354P1 | 0.8392967  | 1.0153971  | -1.0575689 | -1.1137394 |             |                |
| DM12778P1 | 0.8393022  | 1.053811   | -1.0845164 | 1.097815   | DMOJ\GI1316 | XM_002007813.1 |
| DM14409P3 | 0.83950764 | -1.0340418 | 1.0246125  | -1.0977566 |             |                |
| DM14279P2 | 0.8397819  | -1.0522214 | -1.0330918 | -1.1210048 | DBP80       | XM_624943.2    |
| DM08529P1 | 0.83987826 | 1.0221004  | -1.0476167 | -1.0335582 |             |                |
| DM04726P2 | 0.83995324 | 1.002543   | -1.0660496 | 1.1094524  |             |                |
| DM12780P2 | 0.83995944 | 1.0871568  | 1.0665194  | 1.1926494  |             |                |
| DM06783P4 | 0.84016085 | -1.0039089 | -1.0373781 | 1.0728867  |             |                |
| DM00134P4 | 0.8401671  | 1.100785   | 1.2490609  | -1.0177397 | LOC658635   | XM_961510.2    |
| DM10694P2 | 0.8402225  | -1.0501804 | -1.0241109 | -1.1487141 |             |                |
| DM10313P4 | 0.84024256 | -1.2878337 | -1.1148826 | -1.1937861 |             |                |
| DM14990P3 | 0.8408051  | 1.0065758  | -1.085867  | 1.3206272  |             |                |
| DM06046P2 | 0.84090763 | -1.0298014 | 1.0904458  | -1.0107414 |             |                |
| DM13213P1 | 0.840998   | 1.0728028  | 1.0263553  | -1.0278368 |             |                |
| DM04037P1 | 0.8410871  | -1.0608141 | 1.0487833  | 1.0059028  | LOC659069   | XM_965403.2    |
| DM03091P3 | 0.84108907 | 1.0770354  | -1.0027728 | 1.0256287  |             |                |
| DM05675P1 | 0.84125805 | -1.0482655 | -1.0126613 | 1.0364165  |             |                |
| DM08657P1 | 0.8412898  | -1.0495284 | 1.0634781  | -1.0607401 |             |                |
| DM08776P1 | 0.841599   | 1.0581831  | 1.0421906  | -1.0766939 |             |                |
| DM04615P2 | 0.8417096  | 1.1831619  | -1.0757767 | 1.2008034  |             |                |
| DM03594P3 | 0.84171134 | 1.1116296  | 1.0367512  | 1.098405   | AGAP_AGAP0  | XM_001230625.2 |
| DM10442P1 | 0.84184206 | 1.1298819  | -1.1576515 | 1.0313929  |             |                |

|           |            |            |            |            |            |                |
|-----------|------------|------------|------------|------------|------------|----------------|
| DM07509P2 | 0.8421179  | -1.1026851 | -1.1144747 | -1.064592  |            |                |
| DM07367P1 | 0.84279674 | 1.2507228  | 1.0926456  | 1.1955049  |            |                |
| DM10294P3 | 0.84287655 | -1.056468  | -1.1097068 | -1.0078821 |            |                |
| DM09920P3 | 0.84305227 | 1.0425016  | -1.0703872 | 1.204643   |            |                |
| DM09709P1 | 0.84312093 | -1.0427066 | -1.1550555 | 1.005765   |            |                |
| DM10986P1 | 0.8433935  | -1.1835417 | -1.0793531 | -1.2829741 | LOC1001866 | XM_002119531.1 |
| DM00995P1 | 0.8434042  | -1.0659606 | -1.069901  | -1.1028308 | BRAFLDRAFT | XM_002612393.1 |
| DM00755P1 | 0.8437768  | -1.0346179 | 1.0069133  | -1.0527649 | DYAK\GE131 | XM_002090369.1 |
| DM02915P2 | 0.8438276  | -1.0810149 | -1.0915693 | -1.0684111 | RBM39      | XM_425690.2    |
| DM09356P3 | 0.8440324  | 1.0429255  | 1.2452652  | 1.1477307  |            |                |
| DM06074P3 | 0.84405917 | 1.060387   | 1.3710088  | 1.2467626  | CP26       | NM_001134290.1 |
| DM07879P1 | 0.84413993 | 1.0679374  | 1.0285511  | 1.0887372  |            |                |
| DM01426P4 | 0.84414583 | 1.192579   | -1.0132955 | 1.0087229  | NOP2       | NM_001022448.1 |
| DM06996P1 | 0.84450567 | -1.0692513 | -1.0035315 | -1.0320469 |            |                |
| DM13917P1 | 0.8446034  | -1.0352399 | -1.047558  | -1.0830238 |            |                |
| DM06187P1 | 0.8447195  | -1.0265818 | 1.0263563  | 1.0448519  | LOC1001425 | XM_001812711.1 |
| DM11830P1 | 0.84472007 | 1.0244955  | -1.0494086 | 1.1513727  |            |                |
| DM14425P2 | 0.84487003 | 1.0366328  | -1.009255  | 1.0812923  |            |                |
| DM11792P2 | 0.8448837  | 1.0141807  | 1.0595703  | 1.0572633  | DWIL\GK148 | XM_002065158.1 |
| DM12989P1 | 0.84494776 | -1.0316399 | -1.1288366 | 1.0995317  |            |                |
| DM00198P2 | 0.8450324  | -1.0424026 | 1.0040467  | 1.0455495  | DNM        | XM_001652620.1 |
| DM08335P2 | 0.84508884 | 1.0763221  | -1.133754  | -1.2364523 |            |                |
| DM03168P3 | 0.8450995  | 1.0754161  | -1.0647486 | -1.118328  |            |                |
| DM01732P4 | 0.84538186 | 1.1519028  | 1.1330373  | 1.1496747  | ATPALPHA   | NM_001170196.1 |
| DM14408P1 | 0.8458952  | 1.1025009  | 1.0157073  | 1.0533015  |            |                |
| DM05183P1 | 0.84589964 | -1.1632138 | -1.1287899 | -1.0639285 |            |                |
| DM12760P3 | 0.8459036  | 1.124843   | 1.214386   | 1.3291466  |            |                |
| DM05398P2 | 0.8460097  | 1.0913119  | -1.1155232 | -1.1471106 |            |                |
| DM05026P3 | 0.84601516 | -1.0152744 | 1.0126164  | 1.1467204  |            |                |
| DM09847P4 | 0.846164   | 1.1766866  | 1.1725435  | 1.2688806  |            |                |
| DM14564P1 | 0.84620553 | -1.0398986 | 1.0321807  | -1.0081369 |            |                |
| DM13154P3 | 0.8465883  | 1.0362035  | -1.0690582 | -1.1722406 |            |                |
| DM12629P3 | 0.8466622  | 1.0569344  | -1.0619541 | -1.02555   |            |                |
| DM03927P3 | 0.84668005 | 1.0414884  | 1.0224589  | 1.0136575  | DSIM\GD257 | XM_002081353.1 |
| DM12312P1 | 0.8470498  | 1.0624253  | -1.0231495 | 1.0267987  |            |                |
| DM05120P4 | 0.84710443 | -1.0006047 | 1.0496116  | 1.0136766  | TRIADDRAFT | XM_002109804.1 |
| DM02694P1 | 0.8476724  | -1.0603846 | 1.0798788  | -1.0418316 | DGRI\GH222 | XM_001997887.1 |
| DM08943P2 | 0.84783    | 1.0700829  | 1.0544393  | 1.0003684  |            |                |
| DM09167P1 | 0.8478801  | -1.0435758 | -1.2704382 | -1.0924592 |            |                |
| DM05684P1 | 0.8479081  | -1.0867139 | 1.1035423  | 1.143098   |            |                |
| DM05256P3 | 0.84808093 | 1.0000539  | 1.0158161  | 1.0083972  |            |                |
| DM11665P1 | 0.848114   | 1.1310828  | 1.1593746  | 1.1698478  |            |                |
| DM09397P3 | 0.8482086  | 1.078024   | 1.0863023  | 1.1039845  |            |                |
| DM01516P2 | 0.848414   | 1.1064874  | 1.1916488  | -1.1052347 | CCE-A2     | XM_001603992.1 |
| DM03471P2 | 0.8486068  | 1.1124029  | 1.197021   | 1.2156568  |            |                |
| DM08631P3 | 0.8488455  | 1.0697159  | 1.1393414  | 1.1069497  |            |                |
| DM07980P2 | 0.84888965 | 1.0763342  | 1.0091661  | 1.033003   |            |                |
| DM13840P3 | 0.84890944 | -1.0720158 | -1.0141916 | 1.0267111  | LOC732966  | NM_001046964.1 |
| DM00260P2 | 0.84893185 | -1.0845468 | 1.0374748  | -1.051261  |            |                |
| DM10470P2 | 0.8490486  | 1.0557743  | 1.0091016  | 1.0280869  |            |                |

|           |            |            |            |            |            |                |
|-----------|------------|------------|------------|------------|------------|----------------|
| DM01671P1 | 0.84937775 | 1.0448494  | 1.041839   | -1.0036235 | LOC551386  | XM_623781.2    |
| DM03733P1 | 0.8494271  | -1.0800703 | -1.0307921 | -1.0303456 |            |                |
| DM01120P1 | 0.84968585 | 1.0343051  | -1.0076445 | 1.062853   | MONBRDRAF  | XM_001749591.1 |
| DM08820P2 | 0.8498131  | -1.0605638 | 1.0605754  | -1.0423855 |            |                |
| DM09838P2 | 0.84983504 | -1.0047176 | -1.1425025 | -1.1053119 |            |                |
| DM08073P3 | 0.8500582  | 1.0826784  | 1.0065421  | 1.0318153  |            |                |
| DM06869P1 | 0.85008705 | 1.0557356  | -1.0001701 | -1.0759363 | C56G2.7    | NM_065986.5    |
| DM03481P1 | 0.8502128  | -1.01123   | 1.0371236  | -1.0694929 | TMEM195    | NM_001004320.1 |
| DM14699P2 | 0.8503698  | -1.0178685 | 1.0465976  | 1.1102496  |            |                |
| DM06567P1 | 0.8505315  | -1.0481333 | 1.0995669  | -1.0208795 |            |                |
| DM01377P2 | 0.85056555 | 1.0127724  | 1.0602391  | -1.0029238 | NSA2       | NM_001034546.1 |
| DM03921P1 | 0.85087925 | 1.0078858  | -1.0624417 | -1.022793  |            |                |
| DM10525P1 | 0.8510618  | -1.3426259 | -1.0241262 | -1.3352926 |            |                |
| DM05194P2 | 0.85111606 | -1.0472344 | -1.0593973 | -1.0038965 | DSIM\GD171 | XM_002106823.1 |
| DM03423P1 | 0.8511505  | 1.0055121  | 1.1149564  | -1.0000007 | LOC1001986 | XM_002166820.1 |
| DM01064P1 | 0.85126853 | 1.0310398  | -1.0631053 | 1.0479858  | DERE\GG198 | XM_001980182.1 |
| DM14833P2 | 0.8513742  | 1.0541837  | -1.0507402 | 1.1077256  |            |                |
| DM13147P3 | 0.85138404 | 1.0451294  | -1.0742878 | 1.1181815  |            |                |
| DM11473P3 | 0.8514345  | -1.021346  | 1.0203617  | 1.030087   |            |                |
| DM10456P1 | 0.85148776 | -1.261241  | 1.1380678  | -1.1423739 |            |                |
| DM02653P1 | 0.8515363  | -1.1206317 | -1.0942268 | -1.091034  |            |                |
| DM02182P3 | 0.8519034  | 1.0256548  | 1.0288755  | -1.0731169 | RNRS       | XM_397443.3    |
| DM08644P3 | 0.8521085  | 1.1051704  | 1.1565889  | 1.1333956  |            |                |
| DM11875P2 | 0.8524772  | -1.0597234 | -1.1433874 | -1.2541078 |            |                |
| DM03545P2 | 0.8526519  | -1.0119781 | -1.0539472 | 1.0598819  |            |                |
| DM15018P1 | 0.85276777 | -1.0788667 | -1.0466694 | -1.1201557 |            |                |
| DM07746P1 | 0.8527791  | 1.1161308  | 1.0887749  | -1.0578061 |            |                |
| DM06707P3 | 0.8529929  | 1.0789065  | 1.2649314  | 1.2496376  |            |                |
| DM00938P2 | 0.85299337 | 1.130844   | 1.2716551  | 1.0607755  |            |                |
| DM02425P1 | 0.8532196  | -1.0044569 | -1.1753334 | 1.1180423  | MONBRDRAF  | XM_001746122.1 |
| DM08502P3 | 0.8533377  | 1.0574472  | 1.1582363  | 1.053121   |            |                |
| DM03928P1 | 0.8533694  | -1.0105716 | 1.0843129  | 1.0789859  |            |                |
| DM15115P1 | 0.8536414  | 1.0913756  | -1.0031537 | 1.0169685  |            |                |
| DM07930P1 | 0.8536726  | -1.0036229 | 1.1445773  | 1.2339056  |            |                |
| DM02412P1 | 0.8538277  | -1.0088276 | -1.0773945 | -1.0747672 | HM13       | NM_001087405.1 |
| DM00523P4 | 0.8538319  | -1.2646513 | -1.0936165 | -1.2749313 | LOC733131  | NM_001047078.1 |
| DM02882P2 | 0.8540514  | 1.0338771  | 1.0701942  | 1.0246418  |            |                |
| DM07312P3 | 0.85413224 | -1.2917801 | -1.0962126 | 1.0426655  |            |                |
| DM06782P2 | 0.8542539  | -1.0817832 | -1.0634829 | 1.0194231  |            |                |
| DM02977P1 | 0.8543156  | -1.0767782 | 1.0603958  | -1.1159475 |            |                |
| DM07081P2 | 0.85453695 | -1.0305167 | -1.1438498 | 1.1072174  |            |                |
| DM14715P1 | 0.85459095 | -1.2328447 | 1.0050341  | -1.0776116 |            |                |
| DM04414P1 | 0.85470057 | 1.034938   | 1.0100476  | -1.0442394 |            |                |
| DM09995P1 | 0.8548059  | 1.2440745  | 1.2183956  | 1.1869209  |            |                |
| DM14507P3 | 0.85523367 | 1.0093812  | -1.0817873 | -1.023682  |            |                |
| DM01856P1 | 0.85542643 | 1.0816746  | 1.0208813  | -1.0279937 | LOC1001629 | XM_001942706.1 |
| DM13983P3 | 0.8556814  | -1.2750853 | -1.0972469 | -1.1869644 |            |                |
| DM03993P1 | 0.8557882  | 1.0095494  | 1.0072984  | 1.2830142  | CHIT       | XM_001841628.1 |
| DM04238P2 | 0.85579556 | -1.072507  | 1.0324349  | 1.0122608  |            |                |
| DM15084P2 | 0.85593987 | -1.1376991 | 1.032242   | -1.0521138 |            |                |

|           |            |            |            |            |                            |                |
|-----------|------------|------------|------------|------------|----------------------------|----------------|
| DM13327P1 | 0.8559845  | -1.0087899 | 1.1380918  | 1.0216956  |                            |                |
| DM10096P1 | 0.85601884 | -1.1467398 | -1.0452825 | -1.1508632 |                            |                |
| DM07241P2 | 0.85605466 | 1.0908773  | 1.1208141  | 1.1290673  |                            |                |
| DM03372P1 | 0.8563174  | -1.0989567 | 1.012864   | 1.0009892  |                            |                |
| DM14711P2 | 0.8563697  | -1.0065361 | 1.0353593  | -1.0332834 |                            |                |
| DM00137P3 | 0.8564344  | 1.233099   | 1.0226629  | -1.0216956 | BRAFLDRAFT_XM_002593556.1  |                |
| DM06462P1 | 0.8565703  | -1.3406235 | -1.0211141 | 1.0425828  |                            |                |
| DM13279P3 | 0.8565948  | -1.0829169 | -1.060734  | -1.0439428 |                            |                |
| DM06242P3 | 0.8570138  | 1.0631276  | 1.0186951  | 1.0881011  |                            |                |
| DM07290P3 | 0.8570668  | 1.0352105  | -1.0423638 | 1.201335   |                            |                |
| DM06264P1 | 0.85716236 | 1.0596533  | 1.1308253  | -1.0660137 | LOC1000553(XM_001915472.1  |                |
| DM14291P2 | 0.8572692  | 1.101346   | -1.062147  | 1.011377   |                            |                |
| DM04241P1 | 0.8572996  | 1.0299121  | 1.0913725  | 1.0558519  |                            |                |
| DM07240P3 | 0.8573732  | 1.0039663  | 1.1283355  | -1.089528  | LOC1001804:XM_002120912.1  |                |
| DM09345P2 | 0.8575023  | 1.0247645  | -1.0462787 | -1.0549823 |                            |                |
| DM09986P3 | 0.8576743  | 1.2129653  | 1.0560329  | 1.2554108  |                            |                |
| DM06984P2 | 0.8580677  | -1.1662089 | -1.0357826 | -1.0459274 |                            |                |
| DM11915P1 | 0.8581309  | 1.1500225  | 1.1851046  | 1.1625539  |                            |                |
| DM07501P2 | 0.8582038  | 1.1640145  | 1.3966454  | -1.0102111 | CPR15                      | XM_315459.4    |
| DM06876P4 | 0.8584095  | -1.176567  | -1.0439473 | -1.1291403 |                            |                |
| DM00319P1 | 0.8584583  | -1.0695755 | -1.0548631 | 1.0015476  | PRKAC                      | XM_001661926.1 |
| DM07831P3 | 0.85853636 | -1.0109016 | 1.0443138  | -1.0117093 |                            |                |
| DM09542P2 | 0.8586184  | 1.1194787  | 1.1205988  | -1.0196455 |                            |                |
| DM11273P3 | 0.85866046 | 1.227995   | 1.5569316  | 1.0966785  |                            |                |
| DM13693P2 | 0.85876524 | 1.3518325  | 1.4078984  | 1.5560938  |                            |                |
| DM08475P2 | 0.8588702  | 1.1288729  | 1.1285521  | 1.1242224  |                            |                |
| DM08392P4 | 0.85910684 | -1.0195276 | -1.0958784 | -1.1104888 |                            |                |
| DM04782P1 | 0.85911393 | -1.0848798 | -1.0381111 | -1.0747012 |                            |                |
| DM04122P1 | 0.8592527  | -1.219328  | -1.0952067 | -1.1216769 |                            |                |
| DM09870P1 | 0.8592764  | -1.0488489 | 1.0324621  | 1.0253226  |                            |                |
| DM14396P1 | 0.85931337 | -1.0604916 | 1.0997149  | 1.0175555  |                            |                |
| DM08848P3 | 0.8593307  | 1.0797957  | 1.0540386  | 1.049255   |                            |                |
| DM00501P1 | 0.85947895 | -1.0756227 | -1.0252707 | -1.0983231 | SFXN1                      | NM_001096880.1 |
| DM12210P2 | 0.8596122  | 1.1145484  | -1.1500887 | -1.0251526 |                            |                |
| DM03025P1 | 0.8596565  | -1.1221389 | -1.0368994 | -1.0252894 | RBM17                      | NM_001046976.1 |
| DM12395P1 | 0.85967535 | -1.0112836 | -1.0717095 | -1.0273951 |                            |                |
| DM11486P1 | 0.8599553  | -1.0270667 | -1.0282062 | -1.1002963 | DYAK\GE103(XM_002098441.1  |                |
| DM09039P1 | 0.86005455 | -1.4227333 | -1.1640415 | -1.5463835 |                            |                |
| DM11578P3 | 0.86006826 | 1.0175433  | -1.2225783 | 1.0716325  |                            |                |
| DM00492P2 | 0.8601093  | 1.0178337  | 1.0180027  | 1.0742718  | DVIR\GJ2069(XM_002049515.1 |                |
| DM11763P1 | 0.860113   | 1.028678   | -1.12177   | 1.075565   |                            |                |
| DM02899P2 | 0.86013967 | -1.0168095 | -1.0049448 | 1.0763379  | RPS17                      | NM_001126209.2 |
| DM13453P3 | 0.8601438  | 1.0726535  | -1.0101112 | 1.1720173  |                            |                |
| DM06249P4 | 0.8604041  | 1.1295763  | 1.1368417  | 1.2183465  |                            |                |
| DM15314P1 | 0.86059326 | -1.0831708 | -1.136044  | -1.017762  |                            |                |
| DM15215P2 | 0.8607227  | -1.0515412 | 1.0419052  | -1.0502361 | OVGP                       | XM_001650070.1 |
| DM02348P1 | 0.86074984 | 1.1806006  | 1.234295   | -1.0019734 | CUTICLE PRO(XM_001659414.1 |                |
| DM07528P1 | 0.8609399  | -1.0411144 | -1.0283836 | 1.0429728  |                            |                |
| DM08800P1 | 0.86095554 | -1.0636541 | 1.187783   | 1.0247189  |                            |                |
| DM04003P1 | 0.86115336 | 1.0176028  | -1.0459365 | 1.0245478  | DWIL\GK169(XM_002061925.1  |                |

|           |            |            |            |            |             |                |
|-----------|------------|------------|------------|------------|-------------|----------------|
| DM03072P2 | 0.86118317 | -1.0642394 | 1.1822926  | 1.1036915  |             |                |
| DM12195P1 | 0.86128813 | 1.0260442  | 1.0209556  | -1.0399498 |             |                |
| DM10777P3 | 0.86132115 | 1.2258906  | -1.0467544 | 1.1249425  |             |                |
| DM02233P4 | 0.8614     | -1.0232611 | -1.0433817 | 1.0509418  | VHA55       | NM_001170126.1 |
| DM04483P3 | 0.8614454  | -1.0211217 | -1.0889394 | 1.0280944  |             |                |
| DM02803P1 | 0.8614881  | -1.1606594 | -1.0682511 | -1.059266  |             |                |
| DM02262P2 | 0.8615538  | -1.1620834 | -1.0637715 | -1.060583  |             |                |
| DM08985P3 | 0.8616033  | -1.058369  | -1.1627964 | -1.1591411 |             |                |
| DM06818P2 | 0.8621119  | -1.1680064 | -1.1042165 | -1.0736816 | DWIL\GK166  | XM_002062439.1 |
| DM01832P2 | 0.86211807 | -1.0779116 | -1.0515139 | -1.0540428 | DVIR\GJ1808 | XM_002057432.1 |
| DM08913P4 | 0.8623125  | 1.1663868  | -1.012252  | -1.0290604 |             |                |
| DM11256P2 | 0.86254764 | 1.2167524  | 1.223964   | 1.1412321  |             |                |
| DM08371P4 | 0.86269957 | 1.0814574  | -1.0119131 | 1.0841526  |             |                |
| DM10898P4 | 0.8628512  | -1.0248986 | -1.0853119 | -1.0300089 | LOC1001141  | XM_001606125.1 |
| DM00325P2 | 0.8629514  | 1.0496824  | 1.1973757  | -1.0446107 | LOC1001200  | XM_001603652.1 |
| DM05513P2 | 0.8629838  | 1.149807   | 1.1182224  | 1.1411197  |             |                |
| DM06239P3 | 0.8630075  | -1.0267193 | -1.0992795 | 1.0251173  | BRAFLDRAFT  | XM_002612393.1 |
| DM09941P4 | 0.8630338  | 1.0648608  | 1.0347453  | 1.030846   |             |                |
| DM06061P2 | 0.86307526 | -1.0382192 | -1.0687634 | -1.0989654 |             |                |
| DM15165P1 | 0.8632712  | -1.0499135 | 1.0765117  | 1.008565   |             |                |
| DM12903P1 | 0.863327   | -1.052334  | 1.0054946  | 1.1535249  |             |                |
| DM14490P2 | 0.86356115 | -1.2540047 | -1.0776935 | -1.2099162 |             |                |
| DM13781P2 | 0.86395484 | -1.04216   | -1.0427886 | 1.0353961  |             |                |
| DM01566P3 | 0.8640359  | -1.1352271 | -1.0357091 | -1.1207149 | TPM         | XM_001655904.1 |
| DM06390P1 | 0.8641509  | -1.1224892 | -1.0805883 | -1.0712532 | LOC1001591  | XM_001946152.1 |
| DM02545P2 | 0.8642256  | 1.0520238  | -1.0091945 | 1.0226588  | ENOX2       | XM_595997.4    |
| DM03177P1 | 0.8642906  | -1.1956812 | 1.0246618  | -1.0578202 | RNRL        | NM_057679.4    |
| DM03626P2 | 0.86437166 | -1.0015658 | 1.011276   | -1.1594548 |             |                |
| DM13578P2 | 0.8646628  | 1.0169677  | 1.0530072  | 1.0335047  |             |                |
| DM05628P1 | 0.8647643  | 1.1122329  | -1.0248079 | -1.0392774 |             |                |
| DM04503P1 | 0.8647665  | 1.1661463  | -1.0978396 | 1.0998749  | KIN         | XM_507648.2    |
| DM07597P3 | 0.86483604 | 1.1017953  | 1.2326272  | 1.120493   |             |                |
| DM12433P1 | 0.86500347 | -1.1964115 | -1.0753992 | -1.138931  |             |                |
| DM04273P3 | 0.8651983  | 1.0692325  | 1.2477403  | 1.0776635  |             |                |
| DM05296P3 | 0.86521775 | 1.0866158  | 1.0979011  | 1.0498536  |             |                |
| DM10831P4 | 0.8653737  | 1.0900538  | 1.1435436  | -1.1066363 |             |                |
| DM00191P3 | 0.86553663 | 1.009766   | -1.0148546 | -1.051142  | DYAK\GE188  | XM_002088960.1 |
| DM09193P1 | 0.86559254 | 1.0467112  | -1.0327224 | -1.0272174 |             |                |
| DM08582P1 | 0.86562145 | -1.0531949 | 1.0035518  | -1.0686762 |             |                |
| DM09557P1 | 0.8656628  | -1.0545789 | -1.5020183 | -1.073466  |             |                |
| DM04533P2 | 0.86567813 | -1.1708738 | -1.0393817 | -1.1821867 |             |                |
| DM07988P3 | 0.86574304 | -1.0081521 | -1.0370959 | -1.1122262 |             |                |
| DM06208P2 | 0.86602986 | -1.3335791 | -1.015372  | -1.1007539 | CP17        | NM_001172262.1 |
| DM05400P1 | 0.8662318  | -1.0097015 | -1.0678343 | -1.0770718 |             |                |
| DM03248P1 | 0.8662461  | 1.0613339  | -1.0236804 | -1.2487527 |             |                |
| DM07776P2 | 0.86633456 | 1.0050287  | 1.0435535  | -1.0008755 |             |                |
| DM00993P2 | 0.86653644 | 1.1374724  | 1.1739732  | 1.067184   | LOC1001626  | XM_001949424.1 |
| DM04400P3 | 0.86660224 | 1.0677098  | 1.0542017  | -1.0592976 |             |                |
| DM11757P1 | 0.86670595 | -1.0459436 | 1.0247091  | -1.0264928 |             |                |
| DM06056P2 | 0.86675936 | -1.0288675 | -1.2904547 | 1.0419582  | SEC14L2     | NM_144520.2    |



|           |            |            |            |            |                           |                |
|-----------|------------|------------|------------|------------|---------------------------|----------------|
| DM05768P2 | 0.86683124 | 1.2122954  | 1.0632305  | 1.271981   |                           |                |
| DM10238P3 | 0.8668932  | 1.0157155  | 1.0791302  | 1.180864   |                           |                |
| DM01534P2 | 0.8669811  | -1.0601737 | -1.1359874 | -1.101716  | DVIR\GJ1386               | XM_002051105.1 |
| DM04089P1 | 0.86710614 | 1.0058186  | 1.0010377  | -1.0613909 |                           |                |
| DM02406P3 | 0.8672515  | -1.0630759 | -1.0711061 | -1.0846833 | CYP-32A1                  | NM_072608.8    |
| DM10144P4 | 0.8673418  | -1.0502228 | -1.0371459 | -1.0789297 |                           |                |
| DM09325P2 | 0.86754125 | -1.1294593 | -1.0518123 | -1.1696471 |                           |                |
| DM01127P3 | 0.86775476 | -1.0527936 | -1.0615789 | 1.0175985  | LACBIDRAFT_XM_001875410.1 |                |
| DM03696P1 | 0.8677645  | -1.0081329 | 1.0009714  | 1.0362834  | PEPD                      | NM_001095944.1 |
| DM03625P1 | 0.8678227  | 1.1963185  | 1.032079   | 1.1496139  | CAD                       | NM_001009884.1 |
| DM06177P1 | 0.86816126 | 1.0836842  | 1.0392803  | -1.0124545 | BRAFLDRAFT_XM_002587081.1 |                |
| DM15207P1 | 0.86846024 | 1.0478517  | 1.131175   | 1.1520212  |                           |                |
| DM14292P1 | 0.8686139  | 1.0575724  | 1.126848   | -1.1612397 |                           |                |
| DM04626P1 | 0.86865216 | -1.0953147 | -1.019065  | -1.1439891 |                           |                |
| DM06689P3 | 0.8686633  | -1.0714725 | 1.0104243  | -1.1465237 |                           |                |
| DM06889P4 | 0.86867034 | -1.1047845 | -1.1301877 | 1.10715    |                           |                |
| DM07296P1 | 0.86867034 | -1.064285  | -1.1197383 | -1.1023885 |                           |                |
| DM15216P3 | 0.8688424  | -1.0449218 | -1.0127983 | -1.0051435 |                           |                |
| DM10536P4 | 0.86884725 | 1.005235   | 1.0434177  | 1.2244264  |                           |                |
| DM12727P2 | 0.8689565  | -1.0349108 | 1.0412664  | 1.0137331  |                           |                |
| DM07714P1 | 0.8689781  | 1.0605774  | 1.021244   | -1.0239646 |                           |                |
| DM06257P4 | 0.86910576 | 1.1063035  | 1.1043098  | 1.0609586  | TAF12                     | NM_001087686.1 |
| DM02349P1 | 0.8692312  | -1.0026723 | -1.1899186 | -1.0379087 | E2R                       | NM_001161939.1 |
| DM04004P2 | 0.86934096 | -1.0361975 | 1.0244449  | -1.0138372 |                           |                |
| DM15337P2 | 0.86937875 | -1.0847126 | 1.0016139  | -1.2653435 |                           |                |
| DM05620P1 | 0.86941963 | 1.1375059  | 1.2858061  | 1.1793867  |                           |                |
| DM11722P1 | 0.8694555  | 1.1022495  | -1.1410636 | 1.0068331  |                           |                |
| DM06655P2 | 0.86950535 | -1.0346144 | 1.073642   | 1.0279381  |                           |                |
| DM04678P3 | 0.8695821  | -1.0426259 | 1.0385741  | -1.0162933 |                           |                |
| DM05137P1 | 0.8696589  | -1.1180204 | -1.1213294 | -1.0864576 | TXNRD1                    | NM_001094317.1 |
| DM09312P2 | 0.8696811  | 1.0329632  | -1.0174493 | -1.1466932 |                           |                |
| DM12961P2 | 0.86973536 | 1.0460389  | 1.0936135  | 1.1167513  |                           |                |
| DM09566P3 | 0.87002826 | 1.0749067  | 1.0699764  | -1.028267  |                           |                |
| DM08075P3 | 0.8702634  | -1.0429015 | -1.0516804 | 1.0647146  |                           |                |
| DM13241P1 | 0.8703406  | 1.099256   | 1.006019   | -1.0050942 |                           |                |
| DM10001P2 | 0.87034786 | -1.0598724 | -1.0275408 | -1.0131155 |                           |                |
| DM14415P2 | 0.8704637  | -1.1595916 | 1.0476546  | 1.0130861  | SULF2                     | XM_001503514.2 |
| DM03821P3 | 0.87053674 | 1.06233    | 1.0952005  | 1.1056007  | DANA\GF150                | XM_001961545.1 |
| DM13471P2 | 0.8706647  | -1.0045388 | 1.0857815  | 1.004378   | LOC1001170                | XM_001601371.1 |
| DM09708P1 | 0.87075925 | -1.1737198 | -1.3559505 | -1.2062819 |                           |                |
| DM00515P2 | 0.87077737 | 1.0723001  | 1.0712998  | -1.0432055 | LOC1000891                | XM_001518586.1 |
| DM02150P3 | 0.8708013  | 1.0259715  | 1.1348124  | 1.0698403  | DYAK\GE129                | XM_002090182.1 |
| DM06169P4 | 0.8708291  | 1.0405213  | 1.1849313  | 1.0967958  |                           |                |
| DM07805P3 | 0.8708673  | -1.1249906 | 1.0083162  | 1.016282   |                           |                |
| DM12420P2 | 0.8709229  | 1.1697806  | 1.2074872  | 1.113003   |                           |                |
| DM02691P3 | 0.8709645  | -1.0034065 | -1.0589814 | -1.0097963 | BRAFLDRAFT_XM_002610807.1 |                |
| DM10902P1 | 0.8709715  | 1.177447   | 1.0917957  | 1.30414    |                           |                |
| DM04263P1 | 0.8711854  | -1.002917  | -1.0321776 | -1.0366508 |                           |                |
| DM03885P3 | 0.8712413  | 1.0899063  | 1.0875214  | 1.1004944  |                           |                |
| DM02840P1 | 0.87127775 | 1.0090175  | 1.0351202  | 1.1405598  |                           |                |

|           |            |            |            |            |                            |
|-----------|------------|------------|------------|------------|----------------------------|
| DM02521P2 | 0.87130797 | -1.2912182 | -1.1243913 | -1.178963  | RGD1565100 XM_001064732.1  |
| DM10092P4 | 0.87160224 | -1.1455699 | -1.2613344 | -1.1001933 |                            |
| DM08666P1 | 0.8717411  | -1.0045768 | -1.1387765 | 1.0441715  |                            |
| DM05057P1 | 0.8718684  | 1.1787449  | 1.0363995  | 1.152731   |                            |
| DM04242P3 | 0.8719809  | 1.0582409  | -1.0330613 | 1.0277449  |                            |
| DM04261P2 | 0.87227184 | 1.1522791  | 1.138249   | 1.1305183  |                            |
| DM08602P1 | 0.8723179  | 1.05376    | -1.0091113 | -1.0215174 |                            |
| DM13332P3 | 0.8723351  | 1.0604628  | 1.0063225  | 1.1031319  |                            |
| DM05414P1 | 0.87240386 | -1.0091159 | 1.0032161  | -1.1893126 |                            |
| DM14377P3 | 0.87246805 | -1.0322756 | -1.0593452 | -1.1133105 |                            |
| DM01051P1 | 0.8726799  | 1.0872862  | -1.0142161 | 1.0229617  | DSEC\GM192 XM_002040441.1  |
| DM11174P2 | 0.87289655 | -1.1809042 | -1.1019346 | -1.1266718 |                            |
| DM04474P2 | 0.87290764 | -1.1116163 | -1.0700381 | 1.0873162  |                            |
| DM13392P2 | 0.8732954  | -1.0422326 | -1.0606245 | 1.0227878  |                            |
| DM05476P3 | 0.87333834 | 1.0231588  | 1.0570563  | 1.0877229  |                            |
| DM06279P2 | 0.8736307  | -1.0888764 | -1.1401488 | -1.0964553 |                            |
| DM12888P1 | 0.87366635 | 1.003912   | -1.0423688 | 1.0286831  |                            |
| DM00006P1 | 0.8737261  | -1.0329269 | 1.1443166  | 1.1085382  | DGR1\GH226: XM_001993992.1 |
| DM08617P2 | 0.8737811  | 1.0496838  | 1.1426159  | 1.1297077  |                            |
| DM11778P1 | 0.87388974 | 1.0399683  | -1.0221227 | 1.0563958  | LOC1001204: XM_001604049.1 |
| DM01917P1 | 0.87416196 | 1.1800416  | 1.208013   | 1.098818   | AAEL_AAEL0C XM_001649991.1 |
| DM10311P1 | 0.8742898  | -1.2975854 | -1.110493  | -1.3209537 |                            |
| DM10027P1 | 0.8743553  | 1.0080925  | 1.140113   | -1.0176094 |                            |
| DM13398P2 | 0.8744403  | -1.0156889 | 1.0272444  | -1.1403576 |                            |
| DM08990P4 | 0.8747896  | -1.0047123 | -1.0812696 | -1.0138946 |                            |
| DM13247P3 | 0.87482184 | -1.0598761 | 1.0536754  | -1.0255649 |                            |
| DM02253P2 | 0.87493473 | 1.0160472  | -1.1529319 | 1.0072807  | AK1 NM_001003993.1         |
| DM06081P4 | 0.874947   | -1.2056845 | -1.3223381 | -1.1760266 |                            |
| DM04652P1 | 0.8750069  | -1.0296944 | -1.1647916 | 1.0503659  | AGAP_AGAP0 XM_320884.4     |
| DM12310P1 | 0.87507933 | 1.0237023  | 1.1049438  | 1.1307645  |                            |
| DM11554P1 | 0.87508416 | -1.022737  | -1.1620698 | -1.0621368 |                            |
| DM09109P1 | 0.8754709  | -1.35385   | -1.2918005 | -1.3609645 |                            |
| DM05199P1 | 0.87552094 | 1.0652001  | -1.112049  | 1.0028503  |                            |
| DM14838P3 | 0.87555677 | 1.1277814  | 1.1328723  | -1.0362016 |                            |
| DM07221P2 | 0.8757433  | 1.0872785  | 1.0586661  | 1.0475767  |                            |
| DM09917P1 | 0.8760692  | 1.0627751  | 1.0159752  | -1.0927749 |                            |
| DM05339P1 | 0.8761108  | -1.0657924 | -1.1456134 | -1.0242339 | LOC1001603: XM_001952704.1 |
| DM00874P2 | 0.87621605 | 1.0264188  | -1.0847223 | -1.0568792 | ATP2B1A NM_001044757.1     |
| DM12491P2 | 0.87645817 | -1.002584  | 1.0258373  | -1.0257962 |                            |
| DM10709P3 | 0.8765439  | 1.0362328  | 1.0705551  | -1.033795  |                            |
| DM03466P1 | 0.8768335  | -1.0054594 | 1.050069   | -1.0453281 | LOC1002074: XM_002161780.1 |
| DM06864P2 | 0.87689734 | 1.1034751  | -1.014612  | 1.0516554  |                            |
| DM12416P1 | 0.8770154  | 1.0017258  | 1.2384151  | 1.2466059  |                            |
| DM04161P3 | 0.8770471  | 1.0726473  | 1.002359   | -1.1081027 | DANA\GF113: XM_001960747.1 |
| DM10997P2 | 0.8771635  | -1.0096639 | -1.0342523 | -1.0610143 |                            |
| DM05129P3 | 0.87718296 | 1.2182442  | 1.0328163  | 1.0326852  |                            |
| DM09042P2 | 0.87726456 | 1.0147576  | -1.102734  | 1.0326067  |                            |
| DM02611P1 | 0.8773233  | -1.1444737 | -1.1677912 | -1.2182956 |                            |
| DM11808P1 | 0.8774387  | 1.0068214  | -1.0632651 | 1.0406114  |                            |
| DM02500P3 | 0.8774558  | 1.0905973  | 1.3264633  | -1.0110248 | CP17 NM_001172262.1        |

|           |            |            |            |            |                            |
|-----------|------------|------------|------------|------------|----------------------------|
| DM01546P3 | 0.87746197 | 1.0039004  | 1.0240284  | -1.1461138 |                            |
| DM03758P4 | 0.8777685  | 1.2581115  | 1.183275   | 1.2858613  |                            |
| DM10992P1 | 0.87795955 | 1.0814861  | -1.0104296 | 1.0546043  |                            |
| DM12262P1 | 0.8779946  | 1.0037385  | 1.0030388  | 1.0138403  |                            |
| DM01492P3 | 0.8780171  | -1.1011972 | -1.064207  | -1.0592589 | LOC1001777! XM_002129528.1 |
| DM06682P2 | 0.87825245 | -1.1156594 | -1.0757993 | -1.2571496 |                            |
| DM14424P1 | 0.8784842  | -1.0515183 | 1.3024536  | -1.0111084 |                            |
| DM06600P3 | 0.8786063  | 1.0785056  | 1.0288624  | 1.0503694  |                            |
| DM15057P3 | 0.87863415 | -1.0115042 | 1.0920647  | 1.2695794  |                            |
| DM09165P3 | 0.8786535  | -1.0173947 | -1.1020312 | -1.1708153 | LOC663047 XM_969110.2      |
| DM07127P2 | 0.878706   | 1.0651721  | 1.1259898  | 1.2134315  |                            |
| DM08133P2 | 0.8787366  | -1.199285  | -1.1197516 | -1.2432864 |                            |
| DM13038P1 | 0.8789043  | 1.1425089  | 1.0063572  | 1.158955   |                            |
| DM03266P3 | 0.8789426  | -1.135161  | -1.1690539 | -1.157821  | AGAP_AGAP0 XM_306246.4     |
| DM10504P3 | 0.8789828  | 1.0900279  | 1.0115547  | -1.0497268 |                            |
| DM08209P1 | 0.8790446  | 1.0563608  | -1.0366073 | 1.0693305  |                            |
| DM07353P1 | 0.87913626 | -1.0433787 | -1.0576373 | -1.0100144 |                            |
| DM00791P3 | 0.8792042  | -1.0056995 | 1.0061809  | -1.095275  | LOC1001234: XM_001607017.1 |
| DM02373P2 | 0.8794859  | -1.16387   | -1.0286951 | 1.0664648  | LOC1001686: XM_001947884.1 |
| DM03162P1 | 0.87950313 | 1.0231191  | -1.0306782 | -1.2021676 | INTS8 XM_544184.2          |
| DM02034P3 | 0.87961483 | -1.1050107 | 1.0112872  | -1.0004823 | PHYH NM_001017823.1        |
| DM03757P1 | 0.879683   | -1.0282598 | -1.0812111 | -1.0745156 |                            |
| DM12373P3 | 0.8796854  | -1.1041002 | -1.0859888 | -1.0837762 |                            |
| DM00637P2 | 0.8797065  | -1.0942581 | -1.058685  | -1.0906563 | ZDHHC14 XM_849878.1        |
| DM11046P3 | 0.87972057 | -1.1240786 | 1.0382723  | -1.083573  |                            |
| DM14156P3 | 0.87976867 | -1.0541449 | 1.0285453  | 1.1864754  |                            |
| DM01685P4 | 0.8797756  | -1.3987657 | -1.5840354 | -1.6575215 | AMYA XM_001652122.1        |
| DM13972P4 | 0.8798294  | -1.0816414 | -1.0289426 | -1.0518591 |                            |
| DM00888P1 | 0.87990093 | -1.006921  | -1.0909195 | -1.0469002 | DANA\GF113: XM_001960771.1 |
| DM11718P1 | 0.8800159  | 1.0495358  | 1.097256   | -1.0515699 |                            |
| DM14970P3 | 0.88011086 | -1.141305  | 1.0129688  | -1.0361624 |                            |
| DM08187P2 | 0.8805972  | -1.1345    | -1.1104867 | -1.1571348 |                            |
| DM06209P1 | 0.88062274 | -1.0820053 | -1.0628617 | -1.0468242 | DMOJ\GI207: XM_002005899.1 |
| DM06486P1 | 0.88084584 | 1.0319904  | -1.0436409 | -1.1223341 | NEMVEDRAFT XM_001622277.1  |
| DM00475P2 | 0.881004   | -1.0763106 | -1.1389108 | 1.0175369  | LOC1002308: XM_002192686.1 |
| DM02442P2 | 0.8810295  | 1.0703552  | -1.0083292 | 1.0340267  | BRAFLDRAFT XM_002609743.1  |
| DM00421P1 | 0.8812809  | 1.1170024  | 1.1373482  | -1.0099024 | ACE NM_001082395.1         |
| DM09697P2 | 0.8816007  | -1.0447967 | -1.0837213 | -1.0888602 |                            |
| DM04073P2 | 0.88234353 | -1.0647206 | -1.0560124 | -1.0969439 |                            |
| DM14018P3 | 0.88240814 | -1.0479382 | 1.0431156  | 1.0459572  |                            |
| DM00116P1 | 0.8825423  | -1.0950617 | -1.0845847 | -1.1029239 | LOC658635 XM_961510.2      |
| DM06772P1 | 0.88258284 | 1.2413237  | 1.2796289  | 1.0379035  | CUTICLE PRO XM_001659414.1 |
| DM01872P1 | 0.88266695 | -1.0138183 | -1.0527974 | 1.0326432  | LOC655138 XM_961647.2      |
| DM14256P1 | 0.88281035 | 1.0144584  | 1.1906418  | 1.052216   |                            |
| DM13388P1 | 0.883108   | -1.0853844 | 1.1157165  | 1.0328383  |                            |
| DM13978P3 | 0.8833771  | -1.0357459 | -1.0026821 | -1.1040539 |                            |
| DM08387P3 | 0.88339204 | -1.1445451 | -1.0547254 | -1.1511632 |                            |
| DM06693P3 | 0.88356817 | 1.0871214  | 1.028054   | 1.0549858  |                            |
| DM14106P1 | 0.8837518  | -1.0557067 | -1.005758  | 1.0102226  |                            |
| DM01113P2 | 0.8839207  | 1.0581836  | -1.0146599 | 1.0240226  | BM1_35520 XM_001898516.1   |

|           |            |            |            |            |             |                |
|-----------|------------|------------|------------|------------|-------------|----------------|
| DM09462P1 | 0.8839357  | -1.0102007 | 1.1265104  | -1.079164  |             |                |
| DM13860P1 | 0.8839847  | 1.0510775  | 1.0632633  | 1.0771992  |             |                |
| DM04166P3 | 0.8840827  | -1.1967596 | 1.0916256  | -1.1035128 |             |                |
| DM07278P3 | 0.88422984 | -1.2049611 | -1.5239857 | -1.5125793 |             |                |
| DM04267P3 | 0.88423914 | 1.0545493  | -1.0478288 | -1.0305307 |             |                |
| DM11359P1 | 0.88449913 | 1.2554141  | 1.0090467  | 1.12713    |             |                |
| DM10893P1 | 0.8845906  | 1.0224632  | -1.0446016 | -1.0783215 |             |                |
| DM02541P3 | 0.88475484 | -1.0171913 | 1.0483342  | 1.0161601  | NEMVEDRAFT  | XM_001632180.1 |
| DM06114P3 | 0.8852398  | -1.0197865 | -1.0257448 | 1.0302846  |             |                |
| DM08167P1 | 0.8854961  | -1.0772651 | -1.1293529 | 1.0518572  |             |                |
| DM06190P3 | 0.8856574  | -1.0870246 | 1.0525366  | -1.0461984 |             |                |
| DM11139P3 | 0.8859172  | 1.1224947  | 1.1206716  | 1.0359349  |             |                |
| DM10866P1 | 0.8862181  | 1.01598    | -1.0648553 | -1.0280727 |             |                |
| DM07530P1 | 0.8865693  | -1.0610373 | 1.1590874  | 1.0184427  |             |                |
| DM10107P2 | 0.8866442  | -1.0788226 | -1.0167154 | -1.1799864 |             |                |
| DM03769P3 | 0.8867278  | -1.0342325 | 1.1065402  | -1.0063046 |             |                |
| DM13702P1 | 0.8870916  | -1.0381582 | -1.1932751 | 1.0338173  |             |                |
| DM14255P2 | 0.8872147  | 1.0111029  | -1.0636135 | 1.0158728  |             |                |
| DM01109P1 | 0.88726014 | -1.2385106 | -1.0527068 | 1.0529464  | NARS        | NM_027350.3    |
| DM09047P4 | 0.8873281  | -1.0346575 | -1.0603582 | -1.0160468 |             |                |
| DM13519P3 | 0.88751435 | 1.07063    | -1.029369  | -1.0779151 |             |                |
| DM04915P3 | 0.8875226  | 1.0280455  | 1.0306065  | -1.0457754 | RET         | NM_001110099.1 |
| DM00929P2 | 0.8876255  | -1.0228666 | -1.07418   | -1.0905404 |             |                |
| DM02264P3 | 0.8877644  | -1.0306947 | 1.1022557  | 1.0292829  | LOC551692   | XM_624080.1    |
| DM01155P3 | 0.8879824  | -1.000906  | -1.0474077 | -1.0090292 | CAD         | XM_540124.2    |
| DM13230P4 | 0.88807154 | 1.1696769  | 1.1798203  | -1.0084524 | ISCW_ISCWC  | XM_002399761.1 |
| DM13442P1 | 0.8882082  | 1.005339   | 1.0378541  | -1.0621599 | LOC408301   | XM_391852.3    |
| DM15162P4 | 0.8883391  | -1.3219376 | 1.1594496  | 1.0583003  |             |                |
| DM00087P3 | 0.8883741  | 1.2181628  | 1.3065742  | 1.3165946  | AMYREL      | XM_002048980.1 |
| DM10369P2 | 0.888458   | 1.0273626  | 1.1782125  | -1.0979763 |             |                |
| DM10258P1 | 0.8886895  | 1.0415646  | 1.0432886  | -1.0328925 |             |                |
| DM11693P3 | 0.88875514 | -1.1513946 | -1.1125593 | -1.1610998 |             |                |
| DM01933P3 | 0.88889945 | -1.0356094 | -1.0078012 | -1.0608886 | DVIR\GJ1850 | XM_002059362.1 |
| DM02410P1 | 0.8890508  | -1.0148456 | -1.0732884 | 1.0343022  | DANA\GF190  | XM_001966893.1 |
| DM02338P2 | 0.88923275 | -1.037001  | 1.0354618  | -1.0886841 | LOC662941   | XM_969010.2    |
| DM04672P4 | 0.8894487  | 1.0472908  | 1.0708938  | 1.0163038  |             |                |
| DM06667P1 | 0.8894503  | -1.0774035 | -1.1524572 | -1.0029297 |             |                |
| DM11517P2 | 0.8895117  | -1.053101  | -1.0146185 | -1.0143505 |             |                |
| DM04691P3 | 0.8897935  | 1.0515496  | -1.0119452 | 1.133254   |             |                |
| DM05611P2 | 0.89012194 | 1.0433136  | -1.0346026 | -1.1632073 |             |                |
| DM15110P1 | 0.8901483  | -1.1551753 | -1.0419351 | -1.0804969 |             |                |
| DM02940P3 | 0.8902876  | 1.0842773  | 1.090202   | -1.1422936 |             |                |
| DM14201P4 | 0.89043695 | 1.1163825  | 1.1544967  | 1.2082734  |             |                |
| DM02268P3 | 0.8904407  | -1.0491642 | 1.0706937  | -1.0502164 | COPS7A      | XM_001162694.1 |
| DM14022P2 | 0.8904723  | -1.2222118 | 1.1256565  | -1.3102317 |             |                |
| DM09722P1 | 0.8909564  | -1.1129373 | 1.0647906  | -1.1498932 |             |                |
| DM15156P3 | 0.89121383 | 1.0588664  | 1.0977174  | 1.1861085  |             |                |
| DM13091P3 | 0.8914787  | -1.1427524 | -1.2771358 | -1.0985389 |             |                |
| DM01418P1 | 0.8914848  | 1.0608035  | 1.0956621  | 1.0914128  | CHGG_08513  | XM_001226439.1 |
| DM10404P2 | 0.89173806 | -1.0151953 | 1.2117411  | 1.0934733  | LOC726700   | XM_001122423.1 |

|           |            |            |            |            |                           |
|-----------|------------|------------|------------|------------|---------------------------|
| DM06050P2 | 0.8921148  | 1.1092582  | 1.0520958  | 1.1939801  |                           |
| DM13228P2 | 0.89212346 | -1.0897148 | 1.0387136  | 1.0075856  |                           |
| DM08051P1 | 0.8922191  | 1.1125251  | -1.0313684 | 1.1099938  |                           |
| DM04661P3 | 0.89222217 | -1.0779763 | -1.074393  | 1.0295652  |                           |
| DM06508P2 | 0.8922987  | 1.1568033  | 1.4473097  | 1.0081117  |                           |
| DM08569P2 | 0.8923795  | 1.2068615  | 1.440438   | 1.3233967  |                           |
| DM00718P2 | 0.89333063 | -1.0507432 | 1.012342   | -1.0418217 | DANA\GF113.XM_001960771.1 |
| DM10017P3 | 0.8936136  | -1.0116082 | 1.1287751  | 1.1222907  |                           |
| DM13216P1 | 0.8936663  | 1.1280985  | 1.09929    | -1.0701977 |                           |
| DM06477P1 | 0.89367896 | 1.0241611  | -1.040095  | 1.0850694  |                           |
| DM08474P1 | 0.8937064  | -1.1152557 | -1.0746764 | -1.1238756 |                           |
| DM11919P1 | 0.89382684 | -1.1879032 | -1.1382716 | -1.1363618 |                           |
| DM10489P1 | 0.8938507  | -1.0219561 | -1.2071419 | -1.0276817 |                           |
| DM05942P3 | 0.8938924  | 1.0250055  | -1.1136434 | -1.1377277 |                           |
| DM08368P3 | 0.89391863 | -1.0079261 | -1.1386566 | 1.0373588  |                           |
| DM12999P2 | 0.8939861  | 1.1084814  | 1.0274119  | 1.1899742  |                           |
| DM13302P3 | 0.8940805  | -1.3036844 | 1.0177495  | -1.2026808 |                           |
| DM10705P2 | 0.8940843  | -1.035413  | 1.0374047  | 1.0637856  |                           |
| DM14589P1 | 0.8941121  | 1.069941   | 1.1672727  | -1.0707657 |                           |
| DM07832P3 | 0.89421797 | -1.142327  | -1.0061059 | -1.062577  |                           |
| DM02676P2 | 0.89428353 | -1.2051224 | -1.1495383 | 1.0034564  | SNAP XM_001654633.1       |
| DM00234P4 | 0.89430976 | -1.0209868 | 1.0234164  | -1.0441893 | DPSE\GA212\XM_001360247.2 |
| DM08826P1 | 0.89438885 | -1.0498104 | -1.0985152 | 1.0167775  |                           |
| DM05395P3 | 0.8944118  | 1.3732889  | 1.112045   | 1.0640826  |                           |
| DM13275P2 | 0.89446306 | -1.0388749 | -1.0045137 | -1.0318521 |                           |
| DM12688P3 | 0.895032   | -1.0000875 | 1.037675   | -1.0127994 |                           |
| DM08604P1 | 0.8952688  | -1.0114849 | -1.0758775 | -1.0846995 |                           |
| DM01042P3 | 0.89532095 | -1.0785503 | 1.0225759  | 1.0186038  | BRAFLDRAFT_XM_002586200.1 |
| DM02796P1 | 0.8953922  | 1.2186847  | 1.078955   | 1.0699015  |                           |
| DM11423P3 | 0.8957209  | 1.0969778  | -1.029143  | 1.0668991  |                           |
| DM13891P1 | 0.8958524  | 1.0361828  | 1.0876089  | 1.0992424  |                           |
| DM08679P3 | 0.8959327  | -1.0378665 | 1.0014229  | 1.0142992  |                           |
| DM01836P2 | 0.8961715  | -1.0175009 | -1.138684  | -1.1857353 |                           |
| DM13608P1 | 0.8961724  | 1.1357397  | -1.0240873 | 1.0107442  |                           |
| DM00482P3 | 0.89633596 | -1.1073481 | -1.0704294 | -1.0482333 | CALR XM_001657698.1       |
| DM09263P1 | 0.8964099  | -1.0405637 | 1.1431434  | -1.0667939 |                           |
| DM02826P1 | 0.8964279  | -1.0240904 | -1.0393386 | 1.0102556  | LOC551775 XM_624161.2     |
| DM06799P4 | 0.89654404 | -1.0319344 | -1.0077609 | 1.0957395  |                           |
| DM10202P3 | 0.8966257  | 1.0406659  | 1.0034494  | -1.0423396 |                           |
| DM06353P1 | 0.89672107 | 1.1386775  | 1.1037912  | 1.1362358  |                           |
| DM05472P4 | 0.8969052  | 1.0426742  | 1.0467321  | -1.000063  |                           |
| DM10305P2 | 0.8969984  | -1.0975901 | 1.0051851  | -1.2151659 |                           |
| DM10638P1 | 0.89704525 | 1.0340345  | -1.134665  | -1.0133531 | DGR1\GH136.XM_001993079.1 |
| DM02002P1 | 0.89705575 | -1.2698599 | -1.1835147 | -1.109352  | LOC588461 XM_788143.2     |
| DM02333P3 | 0.8971324  | -1.005288  | -1.1369361 | 1.0056082  | LOC411538 XM_395009.2     |
| DM04440P3 | 0.8971641  | 1.045405   | -1.0386548 | -1.089984  |                           |
| DM14881P2 | 0.8972482  | 1.0141574  | 1.1237657  | 1.0302559  |                           |
| DM01425P1 | 0.89743847 | -1.1267761 | -1.0757562 | -1.0630805 | NEMVEDRAFT XM_001628155.1 |
| DM00407P4 | 0.89771646 | -1.1232129 | -1.0792836 | -1.0178354 | MARS NM_200076.1          |
| DM05043P3 | 0.89779276 | 1.0707222  | 1.0688999  | 1.0636332  |                           |

|           |            |            |            |            |                            |
|-----------|------------|------------|------------|------------|----------------------------|
| DM15476P4 | 0.8979152  | 1.1295105  | -1.1753389 | 1.0847428  |                            |
| DM14989P4 | 0.8980296  | -1.0250285 | -1.1201463 | 1.0652146  |                            |
| DM13566P3 | 0.8980399  | 1.0183992  | -1.0510038 | -1.0619862 | PHKGAMMA XM_623110.2       |
| DM08967P3 | 0.89805543 | -1.0125302 | -1.0697663 | 1.041682   | DMOJ\GI2352 XM_001998608.1 |
| DM13206P3 | 0.8981836  | 1.0089217  | -1.0609463 | -1.0590905 |                            |
| DM07825P1 | 0.89819056 | 1.0400238  | -1.1434871 | -1.0278621 |                            |
| DM07756P4 | 0.89822084 | -1.075598  | -1.0414865 | -1.2525371 |                            |
| DM14032P1 | 0.8982971  | 1.1438392  | 1.0272408  | 1.0909709  |                            |
| DM04690P1 | 0.89841914 | -1.1210502 | 1.0396165  | -1.1711873 | DMOJ\GI2089 XM_002006134.1 |
| DM08630P1 | 0.898619   | -1.0989839 | -1.0687071 | 1.0603905  |                            |
| DM13806P1 | 0.89868313 | 1.2698661  | 1.2483478  | 1.2746626  |                            |
| DM09392P1 | 0.89870334 | 1.3736683  | 1.323909   | 1.0546818  |                            |
| DM13264P4 | 0.89874446 | -1.036691  | -1.0111127 | 1.0749543  | AGAP_AGAP0 XM_308033.4     |
| DM05380P4 | 0.89881885 | 1.051075   | -1.0096837 | 1.0752412  |                            |
| DM01399P2 | 0.8989642  | -1.1273032 | -1.004728  | -1.1805674 |                            |
| DM05115P2 | 0.899049   | 1.1672595  | 1.1848061  | 1.0873665  |                            |
| DM03920P3 | 0.8990922  | -1.0301054 | -1.1176397 | -1.0230167 | LOC1001665: XM_001949252.1 |
| DM13429P2 | 0.89916277 | -1.0671006 | -1.0517278 | -1.0779798 | PF14_0450 XM_001348588.1   |
| DM01136P1 | 0.8992194  | 1.1063284  | 1.0592744  | -1.001027  | DVIR\GJ1460 XM_002051120.1 |
| DM05444P1 | 0.8992531  | 1.1245711  | -1.0055785 | 1.080903   |                            |
| DM02165P1 | 0.89927113 | 1.132705   | 1.249586   | 1.1364628  |                            |
| DM10841P2 | 0.8993092  | -1.0071065 | 1.085013   | 1.0153586  |                            |
| DM13681P1 | 0.8993178  | -1.068501  | 1.1052945  | 1.0846244  |                            |
| DM07293P1 | 0.8993417  | -1.0841963 | -1.0822035 | -1.1504087 | LOC1000809: XM_001511783.1 |
| DM08768P2 | 0.8994496  | -1.1644892 | -1.0729667 | -1.1165365 | LOC1000136: XM_001363506.1 |
| DM13351P1 | 0.89946514 | -1.0829732 | -1.0218239 | -1.0970967 | LOC1001994: XM_002160017.1 |
| DM09655P1 | 0.89955586 | -1.0816358 | 1.0123491  | 1.1115022  | GNPDA1 NM_001080287.2      |
| DM00518P3 | 0.89964193 | -1.0355496 | -1.0995668 | 1.0372468  | DPSE\GA258: XM_002132505.1 |
| DM02526P3 | 0.8996714  | -1.0692228 | 1.0211648  | -1.0468547 | PI4KB XM_540314.2          |
| DM05652P1 | 0.89981353 | -1.1331382 | -1.1408424 | 1.0099981  |                            |
| DM11341P2 | 0.9002843  | 1.0408788  | 1.0328157  | -1.0351161 |                            |
| DM09493P1 | 0.90032434 | -1.104947  | -1.1656104 | -1.113301  |                            |
| DM03225P4 | 0.90039545 | 1.1142143  | 1.1226516  | 1.0626439  |                            |
| DM13833P2 | 0.9004034  | 1.0954555  | 1.2137566  | 1.0166204  |                            |
| DM10953P1 | 0.90050524 | -1.0531399 | 1.2798375  | 1.0278665  |                            |
| DM13905P2 | 0.9005277  | 1.0236158  | 1.0862495  | 1.0495934  |                            |
| DM02692P2 | 0.90058285 | -1.1227152 | -1.2164468 | -1.4538859 | LOC578233 XM_001196912.1   |
| DM14416P3 | 0.9008896  | 1.0889665  | -1.0130974 | 1.1771533  |                            |
| DM02697P3 | 0.9008986  | 1.1626042  | -1.0078565 | -1.02527   | DGRI\GH153: XM_001983882.1 |
| DM11002P1 | 0.9009819  | 1.1752483  | 1.0081444  | 1.0396812  |                            |
| DM06129P1 | 0.90133    | -1.1274397 | -1.1361743 | -1.1304201 | LOC581807 XM_781790.2      |
| DM15245P2 | 0.90170443 | -1.070215  | -1.0814025 | 1.0267905  |                            |
| DM11151P1 | 0.90195185 | -1.0090208 | 1.0053927  | -1.0450137 |                            |
| DM04884P2 | 0.90196085 | -1.0267408 | -1.0129613 | -1.122527  | DWIL\GK204: XM_002068396.1 |
| DM13887P3 | 0.902078   | -1.0347525 | 1.0097643  | -1.1498623 |                            |
| DM08654P1 | 0.9025317  | 1.0188328  | 1.0903678  | -1.0590248 | CHRO.30098 XM_660291.1     |
| DM11833P3 | 0.90256196 | 1.0964957  | -1.1041551 | -1.0140358 |                            |
| DM05595P3 | 0.9026316  | -1.0102019 | -1.3768299 | -1.022063  |                            |
| DM15281P1 | 0.9029173  | 1.0826535  | -1.0176686 | 1.0135176  |                            |
| DM09280P3 | 0.9031155  | -1.1217382 | -1.2464287 | -1.133734  |                            |

|           |            |            |            |            |            |                |
|-----------|------------|------------|------------|------------|------------|----------------|
| DM03001P4 | 0.9031533  | 1.018406   | 1.016392   | 1.0929871  | LOC1000618 | XM_001502623.1 |
| DM10179P1 | 0.9031985  | 1.1303853  | -1.0004585 | 1.1941515  |            |                |
| DM13405P2 | 0.90335286 | -1.0837898 | 1.0094285  | -1.2235918 |            |                |
| DM01048P1 | 0.9034982  | -1.0207741 | 1.1114603  | 1.0433997  |            |                |
| DM07999P1 | 0.90361905 | -1.0464693 | 1.021982   | -1.0038978 |            |                |
| DM13407P3 | 0.90418786 | -1.052314  | -1.0935303 | -1.0473169 |            |                |
| DM02298P2 | 0.9042706  | -1.019573  | -1.081354  | -1.0457724 | SLC25A11   | NM_022398.1    |
| DM13936P1 | 0.9042982  | -1.1889436 | -1.2157526 | -1.1805104 |            |                |
| DM02588P1 | 0.90451545 | -1.0169107 | -1.0209417 | -1.0039519 | DGRI\GH195 | XM_001990670.1 |
| DM15321P1 | 0.90452945 | 1.0215386  | 1.1327734  | 1.0220622  |            |                |
| DM03202P4 | 0.9045639  | -1.0126723 | -1.1861703 | -1.0766714 |            |                |
| DM10880P1 | 0.9047342  | 1.1197125  | 1.0985953  | 1.1836822  |            |                |
| DM14663P2 | 0.90478057 | -1.0408212 | 1.000536   | 1.063355   |            |                |
| DM01517P2 | 0.90480494 | -1.0030649 | 1.0080031  | 1.0453447  |            |                |
| DM14750P1 | 0.9049847  | -1.0776196 | -1.0325286 | -1.0686293 |            |                |
| DM00859P3 | 0.90541    | -1.0358903 | 1.0796082  | -1.1514581 | XL64PHR    | NM_001087952.1 |
| DM09814P2 | 0.90548825 | 1.0566971  | 1.1734108  | 1.1621574  |            |                |
| DM07232P3 | 0.90565175 | 1.0128279  | 1.1860783  | 1.2120807  |            |                |
| DM14421P1 | 0.90582025 | -1.259351  | -1.1703608 | -1.153983  |            |                |
| DM09244P4 | 0.90584457 | -1.0134013 | -1.0782185 | -1.0680828 |            |                |
| DM04968P1 | 0.9059933  | -1.0994298 | 1.0615631  | -1.1312217 |            |                |
| DM10828P1 | 0.90612596 | 1.0826306  | -1.1317904 | -1.0520508 |            |                |
| DM04363P1 | 0.906496   | -1.1315517 | -1.0269873 | 1.0050173  |            |                |
| DM09009P2 | 0.90719867 | 1.0086421  | 1.0324126  | -1.1448065 |            |                |
| DM05543P1 | 0.907211   | -1.0235384 | -1.0056705 | 1.0326064  |            |                |
| DM09675P1 | 0.90727866 | -1.0241987 | -1.0457546 | -1.101266  |            |                |
| DM10855P3 | 0.90754646 | -1.1086975 | -1.0967795 | -1.1704142 |            |                |
| DM01946P2 | 0.9076675  | -1.1420541 | -1.1130854 | -1.3537549 | FGGY       | NM_001093701.1 |
| DM00486P2 | 0.9078337  | 1.0304623  | -1.0408202 | -1.174112  | ATP1A1     | XM_002404017.1 |
| DM14337P1 | 0.9079677  | -1.0863113 | -1.1654508 | -1.0423617 | DPSE\GA177 | XM_001361603.1 |
| DM02912P2 | 0.90799254 | -1.0296792 | 1.0583332  | 1.0247135  |            |                |
| DM07563P2 | 0.9080441  | 1.0561068  | 1.0000831  | 1.1186495  |            |                |
| DM13609P3 | 0.9082994  | -1.0702968 | -1.131464  | -1.0687991 |            |                |
| DM02744P1 | 0.9087172  | 1.0386358  | 1.0729406  | 1.0254998  |            |                |
| DM14969P3 | 0.90908164 | 1.2680249  | 1.306962   | 1.1920394  |            |                |
| DM03362P1 | 0.90921205 | -1.0870053 | -1.1057688 | -1.0040954 | RPS18A     | XM_001658273.1 |
| DM07179P1 | 0.9092214  | 1.0349723  | -1.0146197 | 1.0381778  |            |                |
| DM10789P2 | 0.90953153 | -1.0122349 | -1.2604418 | 1.0290582  |            |                |
| DM02885P1 | 0.90956223 | 1.4136893  | 1.3551763  | 1.0632522  | LOC1001657 | NM_001134286.1 |
| DM07562P3 | 0.9097455  | -1.3089129 | -1.0519632 | -1.230103  | DYAK\GE139 | XM_002092030.1 |
| DM03188P3 | 0.90988964 | 1.0214297  | 1.1399627  | 1.1835114  |            |                |
| DM10672P1 | 0.90989393 | 1.1064094  | 1.1006947  | 1.0686985  |            |                |
| DM11365P3 | 0.9099403  | 1.0449028  | 1.0045584  | 1.0815436  |            |                |
| DM13178P2 | 0.9099567  | -1.010615  | -1.1130184 | -1.0724262 |            |                |
| DM10462P2 | 0.9105798  | -1.0163765 | 1.0557196  | 1.0379335  |            |                |
| DM06048P3 | 0.91085863 | -1.0176876 | -1.0551959 | -1.0826428 |            |                |
| DM13031P1 | 0.91089106 | -1.0431538 | -1.0168203 | -1.1161287 |            |                |
| DM09648P1 | 0.9109795  | 1.082975   | 1.0253962  | 1.0664381  |            |                |
| DM02228P3 | 0.9111901  | -1.0132384 | 1.0254074  | -1.0423927 | TAL        | XM_397306.3    |
| DM03337P3 | 0.9112658  | 1.0491278  | 1.0167127  | -1.1564422 | DANA\GF229 | XM_001964682.1 |

|           |            |            |            |            |              |                |
|-----------|------------|------------|------------|------------|--------------|----------------|
| DM01253P2 | 0.9113842  | -1.0217266 | 1.0214999  | 1.0809455  | NEMVEDRAFT   | XM_001627009.1 |
| DM07681P1 | 0.91150993 | 1.0771832  | 1.0389622  | 1.12647    |              |                |
| DM08852P4 | 0.9115779  | 1.0319383  | 1.0363184  | -1.0370702 |              |                |
| DM12502P3 | 0.91170764 | -1.2356346 | 1.0167984  | -1.2960086 |              |                |
| DM05254P2 | 0.911821   | -1.0993497 | -1.0705345 | -1.1348925 |              |                |
| DM06437P1 | 0.911933   | -1.0322912 | -1.0359615 | -1.064502  |              |                |
| DM11278P3 | 0.9120493  | -1.0696493 | 1.0952215  | 1.0439788  |              |                |
| DM01523P1 | 0.91232634 | 1.046126   | 1.1564343  | 1.0612049  | TDH          | XM_001656762.1 |
| DM02301P3 | 0.9125119  | -1.0924758 | -1.057654  | -1.065151  |              |                |
| DM09614P3 | 0.91259027 | -1.0425241 | 1.028722   | 1.0627692  |              |                |
| DM07843P1 | 0.9126194  | -1.1469067 | -1.1715332 | -1.1749386 |              |                |
| DM02895P2 | 0.91291726 | 1.0056427  | -1.1688623 | 1.0038404  | LUC7L        | NM_001080301.1 |
| DM07407P1 | 0.91293174 | 1.1790247  | 1.1565402  | 1.2371147  |              |                |
| DM03764P1 | 0.91306806 | 1.0152595  | -1.0258776 | -1.0304228 |              |                |
| DM00618P1 | 0.9132795  | 1.1066436  | -1.1621002 | -1.1366787 | ISCW_ISCWC   | XM_002408619.1 |
| DM09118P1 | 0.91328824 | 1.1799589  | 1.2418437  | 1.0925153  |              |                |
| DM07667P2 | 0.91330695 | 1.0118291  | 1.2026381  | 1.0507734  |              |                |
| DM09531P1 | 0.9133345  | -1.0141835 | 1.0141785  | 1.155645   |              |                |
| DM15315P1 | 0.9135442  | 1.0147352  | 1.0113237  | 1.1002105  |              |                |
| DM10430P1 | 0.91369224 | 1.1153466  | 1.0635176  | -1.1206697 |              |                |
| DM09433P1 | 0.9137837  | 1.0119646  | -1.0143884 | -1.100832  |              |                |
| DM05347P3 | 0.91378486 | -1.0092328 | 1.0192608  | -1.0567378 |              |                |
| DM05799P1 | 0.91392905 | 1.0871488  | 1.1349674  | -1.0259924 |              |                |
| DM07438P4 | 0.9139473  | -1.1887429 | -1.2196046 | -1.0598656 |              |                |
| DM05465P2 | 0.9139511  | -1.0747932 | 1.2891829  | 1.1118526  |              |                |
| DM12428P3 | 0.91419536 | -1.0140319 | 1.2203933  | 1.1003228  |              |                |
| DM04977P4 | 0.9142825  | 1.1479286  | 1.2122352  | 1.0786369  |              |                |
| DM04218P1 | 0.9144629  | -1.1083343 | 1.0978105  | -1.0502268 |              |                |
| DM10173P1 | 0.9145554  | 1.0207268  | -1.0557256 | -1.002142  |              |                |
| DM11444P4 | 0.914802   | 1.0837741  | 1.0229305  | 1.0495954  |              |                |
| DM00736P2 | 0.9149002  | -1.1885809 | -1.2038692 | -1.136938  | LOC1001588:  | XM_001944283.1 |
| DM14580P1 | 0.9150415  | -1.076699  | 1.0025733  | -1.0805062 |              |                |
| DM01398P1 | 0.9150999  | -1.0347806 | -1.1373221 | -1.0098022 | DYAK\GE217!  | XM_002094282.1 |
| DM13516P3 | 0.91513026 | 1.0156145  | -1.022408  | -1.179149  |              |                |
| DM11330P2 | 0.9152167  | 1.0457468  | 1.0734386  | 1.0062921  |              |                |
| DM05456P1 | 0.91531754 | -1.1390625 | 1.0232863  | -1.1141733 | SI: DKEY-5G7 | NM_001025529.1 |
| DM01411P3 | 0.91553205 | 1.0144571  | -1.0700101 | 1.0653878  | RNF10        | NM_001096369.1 |
| DM00447P1 | 0.91562223 | 1.0901489  | 1.2578691  | 1.19715    | AMYREL       | XM_002048980.1 |
| DM13703P3 | 0.91565055 | -1.144141  | -1.1261083 | -1.1519527 | DANA\GF141   | XM_001962977.1 |
| DM00639P1 | 0.91566575 | 1.0577676  | -1.0510329 | -1.0000023 | ATP1A1       | NM_001009360.1 |
| DM14306P4 | 0.9158409  | 1.0063918  | -1.0869507 | -1.0029914 |              |                |
| DM15106P2 | 0.91588396 | -1.1965454 | -1.3509159 | -1.1330893 |              |                |
| DM05681P4 | 0.916042   | -1.011523  | -1.0459448 | -1.051642  |              |                |
| DM04897P1 | 0.91606504 | 1.0472798  | 1.1513442  | 1.088915   |              |                |
| DM06560P1 | 0.9161412  | 1.2115536  | 1.2194744  | 1.1208369  |              |                |
| DM11338P4 | 0.91624117 | -1.0480037 | 1.0516778  | -1.1500071 |              |                |
| DM04367P2 | 0.9162483  | -1.062065  | -1.0241872 | -1.0812722 |              |                |
| DM08619P3 | 0.9162938  | 1.0174001  | -1.0160711 | 1.0437769  |              |                |
| DM14773P2 | 0.91642636 | -1.0293909 | 1.0119053  | 1.1080668  |              |                |
| DM11149P2 | 0.91673964 | 1.0267134  | 1.0756062  | 1.0773225  |              |                |



|           |            |            |            |            |                            |
|-----------|------------|------------|------------|------------|----------------------------|
| DM09508P1 | 0.91684145 | -1.0503561 | 1.0201287  | -1.0080938 |                            |
| DM05117P1 | 0.9168978  | -1.0299942 | 1.1909186  | 1.0806841  |                            |
| DM03351P3 | 0.9169063  | -1.0763448 | -1.053541  | -1.11619   | LOC1002838:NM_001156724.1  |
| DM14111P2 | 0.917095   | -1.0477294 | -1.0949143 | -1.0439095 |                            |
| DM11917P2 | 0.91720563 | -1.0123082 | 1.0399991  | -1.0529321 |                            |
| DM07297P3 | 0.9174585  | -1.0524502 | -1.1285865 | -1.0460645 |                            |
| DM10667P1 | 0.91748035 | -1.0242634 | -1.1166898 | -1.1010807 |                            |
| DM01954P4 | 0.91753376 | -1.0733021 | -1.0196791 | 1.0239846  | LOC1001163(XM_001600783.1  |
| DM13635P2 | 0.917561   | 1.110324   | -1.1386024 | 1.1003065  |                            |
| DM08466P1 | 0.91761726 | -1.0686796 | -1.0796015 | -1.3312243 |                            |
| DM04734P1 | 0.9176512  | -1.061932  | -1.138087  | -1.0841558 |                            |
| DM01115P2 | 0.917875   | -1.0949341 | -1.0357797 | -1.2594501 | LOC657392 XM_001810665.1   |
| DM12898P1 | 0.91790265 | 1.0259396  | 1.0362647  | 1.0025486  |                            |
| DM03323P2 | 0.9179404  | -1.051326  | -1.0396582 | -1.091263  | LOC412193 XM_395656.3      |
| DM09949P1 | 0.91798496 | -1.0523438 | 1.0550493  | 1.0311364  |                            |
| DM10783P1 | 0.9179997  | 1.133179   | -1.0026147 | -1.1459364 |                            |
| DM00252P2 | 0.9181027  | -1.0405463 | 1.0064025  | -1.0568092 | DGRI\GH200 XM_001987208.1  |
| DM06795P1 | 0.91811967 | -1.0805392 | -1.1121157 | -1.1485245 |                            |
| DM09341P2 | 0.9181274  | -1.042026  | 1.0322611  | -1.135968  |                            |
| DM06104P1 | 0.91816866 | 1.0572379  | -1.0065887 | 1.0572726  |                            |
| DM06766P3 | 0.91821975 | -1.069103  | 1.051638   | 1.0312743  |                            |
| DM09948P1 | 0.91823286 | -1.2942109 | -1.0148599 | -1.0563955 |                            |
| DM03875P3 | 0.91860336 | -1.0772591 | -1.0901701 | 1.0909072  |                            |
| DM15175P2 | 0.91862607 | -1.1373217 | -1.0928704 | 1.0174873  |                            |
| DM11069P1 | 0.91862696 | -1.010531  | 1.0146943  | -1.0495139 |                            |
| DM01215P1 | 0.91866374 | -1.3188262 | -1.0140356 | 1.0717328  |                            |
| DM12832P2 | 0.91868263 | 1.0351496  | 1.0569321  | 1.0761675  | PC000794.04 XM_739910.1    |
| DM15332P1 | 0.9190856  | -1.376791  | -1.1647135 | -1.1169163 |                            |
| DM03788P3 | 0.91963035 | 1.126969   | 1.1495352  | 1.2333326  |                            |
| DM03773P1 | 0.91969055 | 1.0304468  | -1.0204803 | -1.0730264 |                            |
| DM07491P4 | 0.9198131  | -1.0157884 | -1.0887588 | -1.0935344 |                            |
| DM09853P2 | 0.919826   | -1.0479149 | -1.1219897 | -1.070246  |                            |
| DM11901P3 | 0.91987324 | -1.0315502 | -1.0823236 | -1.0261933 |                            |
| DM10624P3 | 0.91988415 | -1.0304554 | 1.0471021  | 1.0874553  |                            |
| DM11481P2 | 0.9199134  | -1.0513333 | 1.0185142  | -1.0229754 |                            |
| DM12134P3 | 0.9199649  | -1.0567771 | 1.0958595  | 1.2013341  |                            |
| DM08895P3 | 0.920363   | -1.0515394 | -1.0180719 | -1.0424374 |                            |
| DM02943P2 | 0.9204222  | -1.0451247 | 1.1044109  | 1.0178511  | DMOJ\GI116 XM_002008695.1  |
| DM14499P3 | 0.9204357  | -1.2520697 | -1.0982841 | -1.1364197 |                            |
| DM03132P1 | 0.9207474  | -1.0234451 | -1.1017913 | -1.2981205 | NEFM NM_001111214.1        |
| DM09315P1 | 0.9207673  | -1.0466336 | -1.048488  | -1.142675  |                            |
| DM03589P3 | 0.9207753  | -1.1122919 | 1.0384815  | 1.0361377  |                            |
| DM10755P1 | 0.9208654  | -1.0393416 | 1.1308892  | 1.0252159  | DVIR\GJ1445 XM_002058462.1 |
| DM08523P1 | 0.9208667  | -1.0954671 | -1.2310805 | -1.0706174 |                            |
| DM04035P1 | 0.9209752  | 1.0053324  | 1.0059719  | -1.0308453 |                            |
| DM04589P4 | 0.92105484 | -1.1697023 | -1.1052128 | -1.1670972 |                            |
| DM07315P1 | 0.9214708  | -1.0356314 | 1.0066748  | -1.0404947 |                            |
| DM15011P3 | 0.9217174  | -1.2677524 | -1.1738744 | -1.1361936 |                            |
| DM14138P3 | 0.9218336  | -1.0773085 | -1.0780089 | 1.0234219  |                            |
| DM04912P3 | 0.9220662  | 1.0482724  | 1.0712472  | -1.0870308 |                            |

|           |            |            |            |            |             |                |
|-----------|------------|------------|------------|------------|-------------|----------------|
| DM15318P1 | 0.9220777  | -1.1143354 | -1.1963809 | -1.0188423 |             |                |
| DM11320P3 | 0.92215645 | -1.0583013 | 1.0116712  | -1.0351208 | RPL41       | NM_001135910.1 |
| DM15024P3 | 0.92221516 | -1.0076505 | 1.0073096  | 1.1427376  |             |                |
| DM03492P2 | 0.9223545  | 1.0771451  | -1.0563062 | 1.3547707  | LOC409459   | XM_392970.3    |
| DM02342P4 | 0.92235893 | -1.0468166 | 1.0884613  | 1.1064273  | H4          | XM_001657213.1 |
| DM04385P4 | 0.92244625 | -1.0349495 | 1.0394263  | -1.1199572 |             |                |
| DM13981P3 | 0.9224857  | -1.0190375 | 1.1370697  | 1.2059962  |             |                |
| DM11873P1 | 0.9225456  | 1.0836219  | 1.0427761  | 1.0541973  |             |                |
| DM13140P1 | 0.92254937 | -1.069509  | 1.0497931  | -1.0889446 |             |                |
| DM13971P3 | 0.92263997 | 1.1530068  | 1.0077206  | -1.0673807 |             |                |
| DM03822P3 | 0.9226657  | -1.1244274 | 1.0264553  | -1.1240429 |             |                |
| DM08091P1 | 0.9228653  | 1.0009674  | 1.0264207  | 1.0532337  |             |                |
| DM06215P1 | 0.92313755 | 1.0058239  | -1.0640697 | 1.0008821  | AGAP_AGAP0  | XM_310789.4    |
| DM06511P1 | 0.9232284  | -1.124818  | -1.164122  | -1.0844158 |             |                |
| DM10602P1 | 0.92342937 | -1.0238447 | -1.1200006 | -1.2195165 |             |                |
| DM14557P1 | 0.92354786 | 1.0654287  | -1.1267323 | 1.0687274  |             |                |
| DM09129P4 | 0.92369837 | 1.0286543  | 1.0194921  | 1.174985   |             |                |
| DM07485P2 | 0.9238062  | -1.0709288 | -1.0692067 | 1.0474552  |             |                |
| DM09065P1 | 0.9239709  | 1.0598292  | 1.016551   | 1.0052229  |             |                |
| DM01281P2 | 0.92399305 | -1.0146997 | -1.087497  | -1.0800194 | LOC576034   | XM_776382.2    |
| DM05726P3 | 0.9240185  | 1.024388   | -1.0195333 | -1.0650226 |             |                |
| DM06100P2 | 0.92442715 | 1.0120938  | 1.0083619  | 1.0770793  | DANA\GF149  | XM_001961397.1 |
| DM02211P2 | 0.9246391  | -1.0608213 | 1.1250833  | 1.2100806  | CUTICLE PRO | XM_001659414.1 |
| DM10860P2 | 0.9247403  | -1.0082617 | -1.0480123 | -1.1012203 |             |                |
| DM11737P3 | 0.92495537 | -1.0396509 | -1.0437891 | -1.0351665 |             |                |
| DM14438P1 | 0.9250109  | 1.1014489  | -1.0556896 | 1.02192    |             |                |
| DM03034P1 | 0.92513853 | 1.0369681  | -1.0013076 | -1.0439268 | DSIM\GD109  | XM_002081280.1 |
| DM14725P3 | 0.9251431  | 1.1585993  | 1.0235881  | -1.0049716 |             |                |
| DM02031P1 | 0.9252654  | 1.1679771  | 1.1068518  | 1.0593778  | DMOJ\GI120  | XM_002008065.1 |
| DM10947P3 | 0.92534846 | -1.0237137 | 1.0193899  | -1.0045494 |             |                |
| DM12271P2 | 0.92543966 | -1.0293808 | 1.1444817  | 1.0201473  |             |                |
| DM02976P1 | 0.92563176 | -1.0119851 | 1.0044534  | 1.0023338  | DPER\GL212  | XM_002029516.1 |
| DM07477P1 | 0.92563456 | 1.0387542  | 1.1907676  | 1.0407268  |             |                |
| DM11269P1 | 0.92563546 | -1.0025452 | 1.0487959  | -1.0314473 |             |                |
| DM13745P1 | 0.925713   | 1.0259606  | -1.0109894 | 1.0627955  |             |                |
| DM09839P3 | 0.9258504  | -1.0036379 | 1.047704   | 1.0422133  |             |                |
| DM05061P2 | 0.92593133 | -1.0385735 | -1.0499128 | -1.0357784 | LOC1000194  | XM_001372287.1 |
| DM11622P4 | 0.92596126 | -1.1579386 | -1.0645288 | -1.1811793 |             |                |
| DM12273P3 | 0.92597455 | 1.1749982  | 1.2721568  | 1.0371295  |             |                |
| DM02687P2 | 0.9260695  | 1.047889   | 1.0129204  | 1.0583003  | LOC661714   | XM_967860.1    |
| DM14548P3 | 0.9260728  | -1.0503246 | -1.0748898 | -1.124316  |             |                |
| DM11846P1 | 0.92622197 | -1.0778207 | -1.1932653 | -1.0132296 |             |                |
| DM03413P2 | 0.9264448  | -1.0383884 | -1.0283015 | 1.0800709  |             |                |
| DM02726P4 | 0.9265104  | -1.0194852 | 1.0151875  | 1.1843381  |             |                |
| DM06713P1 | 0.926652   | -1.2172587 | -1.0464774 | -1.1825527 |             |                |
| DM01434P2 | 0.92668337 | 1.0161308  | -1.0431166 | -1.0790786 | LOC1000162  | XM_001370125.1 |
| DM05570P2 | 0.92691875 | 1.0376033  | 1.0371498  | 1.1042196  |             |                |
| DM07885P1 | 0.92694026 | -1.0524275 | -1.037335  | 1.0173199  |             |                |
| DM09665P2 | 0.92708457 | -1.0378277 | 1.0387827  | 1.0036936  |             |                |
| DM06627P3 | 0.92712545 | 1.0530041  | 1.0337213  | -1.1243145 |             |                |

|           |            |            |            |            |            |                |
|-----------|------------|------------|------------|------------|------------|----------------|
| DM06431P2 | 0.9271731  | -1.2358952 | 1.0099579  | 1.0500289  |            |                |
| DM02323P2 | 0.9274353  | -1.0613999 | -1.0224953 | 1.033214   | DPER\GL156 | XM_002027284.1 |
| DM08342P2 | 0.9275439  | 1.0834978  | -1.0192431 | 1.0071748  |            |                |
| DM14518P2 | 0.92756194 | 1.0992782  | 1.0406798  | -1.0021087 |            |                |
| DM02960P3 | 0.92758125 | -1.0126511 | 1.0084882  | 1.0636641  | DBIB       | NM_001097111.1 |
| DM12245P4 | 0.9276338  | -1.026877  | -1.0492476 | -1.0836678 |            |                |
| DM12741P1 | 0.9277077  | 1.0095196  | 1.1226983  | -1.058409  |            |                |
| DM14805P3 | 0.9277164  | -1.1974337 | -1.0892813 | 1.0362246  |            |                |
| DM08725P3 | 0.9277522  | -1.1147509 | 1.1522589  | 1.0288438  |            |                |
| DM07328P2 | 0.9277537  | -1.0062921 | 1.0418694  | 1.1258682  |            |                |
| DM12876P1 | 0.92793274 | -1.1238229 | -1.0109713 | 1.0170138  |            |                |
| DM04115P2 | 0.92800826 | -1.052699  | -1.1146731 | -1.1204265 |            |                |
| DM13021P1 | 0.9281319  | 1.0393735  | 1.1560225  | 1.060467   |            |                |
| DM00154P1 | 0.928159   | 1.0764813  | -1.002123  | 1.0131886  | ISCW_ISCWC | XM_002414671.1 |
| DM07373P1 | 0.9281688  | -1.0206528 | -1.0159891 | 1.0088738  | LOC663850  | XM_969883.2    |
| DM01834P1 | 0.92821145 | 1.0671685  | 1.0202985  | 1.0819482  | DMOJ\GI153 | XM_002009382.1 |
| DM03716P2 | 0.9287193  | 1.0306093  | 1.1453283  | 1.0410395  |            |                |
| DM10304P2 | 0.9287866  | -1.1494017 | 1.077196   | -1.0224677 |            |                |
| DM14157P1 | 0.9288673  | -1.1628451 | -1.0938526 | -1.0072432 |            |                |
| DM02720P3 | 0.9288885  | -1.1197277 | -1.0461688 | -1.1629053 |            |                |
| DM00209P3 | 0.9289279  | 1.0169936  | -1.0395377 | 1.0230453  | DANA\GF204 | XM_001963418.1 |
| DM05248P2 | 0.9290016  | 1.1677183  | -1.0777283 | -1.0248061 |            |                |
| DM12255P3 | 0.92914563 | 1.0508503  | -1.0423063 | 1.043744   |            |                |
| DM08316P3 | 0.92933667 | -1.0542787 | 1.1217846  | 1.0534     |            |                |
| DM06487P1 | 0.9294361  | 1.0465931  | -1.0418313 | -1.0531195 |            |                |
| DM14347P1 | 0.92949826 | 1.0193874  | 1.0602832  | -1.0818068 | P2RX4      | NM_001140204.1 |
| DM10162P2 | 0.9295121  | -1.0601053 | 1.000342   | 1.0096294  |            |                |
| DM13326P4 | 0.92952764 | -1.0513891 | -1.050881  | -1.0227972 |            |                |
| DM14273P3 | 0.9299812  | 1.0249964  | 1.0925312  | 1.0927695  |            |                |
| DM05707P3 | 0.9300314  | 1.0081532  | 1.0265093  | -1.0053796 |            |                |
| DM07383P4 | 0.9304248  | 1.0272077  | 1.100023   | 1.1163288  |            |                |
| DM14556P1 | 0.93061423 | 1.0198709  | 1.0408506  | -1.0484275 |            |                |
| DM14480P1 | 0.9308257  | 1.0012746  | 1.0098175  | -1.0582279 |            |                |
| DM13065P3 | 0.9308779  | -1.0246726 | 1.0783826  | 1.0969226  |            |                |
| DM14562P1 | 0.93098736 | 1.0245342  | -1.1614155 | -1.1009355 |            |                |
| DM10611P2 | 0.93099594 | 1.0650036  | 1.0980763  | 1.1014353  |            |                |
| DM05270P3 | 0.9310729  | -1.0897574 | -1.1868261 | -1.0809602 |            |                |
| DM01071P4 | 0.9311365  | 1.0481063  | 1.0048926  | 1.0217451  | DANA\GF146 | XM_001962081.1 |
| DM04072P3 | 0.9313143  | -1.1581316 | -1.1190684 | -1.0975577 | CG34220    | NM_001103783.1 |
| DM07983P3 | 0.9313628  | 1.0141165  | 1.0736988  | 1.0834184  |            |                |
| DM10105P2 | 0.931392   | 1.2753614  | 1.129665   | 1.3420405  | GSPATT0003 | XM_001426894.1 |
| DM07880P3 | 0.9314066  | -1.1379758 | -1.1295688 | -1.0338511 |            |                |
| DM00409P2 | 0.931445   | -1.0909405 | -1.0741262 | 1.0079983  | DMOJ\GI166 | XM_002011949.1 |
| DM11528P3 | 0.93157417 | 1.0387207  | -1.0605874 | 1.080255   |            |                |
| DM13433P1 | 0.93164796 | -1.0766091 | -1.0310348 | -1.0466316 |            |                |
| DM06126P1 | 0.9317983  | 1.0252202  | -1.0207113 | -1.0314627 |            |                |
| DM00693P2 | 0.9318045  | -1.0683719 | -1.096558  | 1.0586331  |            |                |
| DM14100P2 | 0.931806   | 1.009696   | -1.0097092 | 1.0316299  |            |                |
| DM05977P3 | 0.93190676 | 1.0155501  | 1.0352339  | 1.0512894  |            |                |
| DM00927P2 | 0.93211836 | 1.1303031  | 1.0864968  | 1.0272987  | TAGLN      | XM_001652223.1 |

|           |            |            |            |            |             |                |
|-----------|------------|------------|------------|------------|-------------|----------------|
| DM01449P3 | 0.9322714  | 1.2259666  | 1.0946468  | 1.1940774  |             |                |
| DM09878P3 | 0.93259275 | -1.0210168 | 1.0482838  | -1.0152754 |             |                |
| DM02725P3 | 0.9329171  | -1.0420015 | -1.1494621 | -1.1732016 | LOC1002232: | XM_002193922.1 |
| DM11760P4 | 0.93294656 | 1.1596009  | -1.0613136 | 1.0270649  |             |                |
| DM10600P1 | 0.93297625 | 1.0789969  | 1.0081139  | 1.0133138  |             |                |
| DM02659P1 | 0.9329966  | -1.0604665 | -1.1425496 | -1.076298  | CHRNA1      | XM_001893665.1 |
| DM10870P1 | 0.93352836 | 1.1036353  | 1.052802   | 1.0174434  |             |                |
| DM10910P1 | 0.9335806  | -1.0115558 | 1.0220134  | -1.0273451 |             |                |
| DM09421P4 | 0.93361825 | -1.0015544 | 1.1051722  | -1.0207106 |             |                |
| DM07786P2 | 0.9337152  | -1.0120889 | -1.1054335 | -1.1749933 |             |                |
| DM00937P1 | 0.9338821  | -1.0058291 | 1.0000837  | 1.0976888  |             |                |
| DM03657P1 | 0.93400496 | -1.1272291 | -1.0595564 | -1.0698726 | ZGC:112146  | NM_001017731.1 |
| DM03510P4 | 0.9340477  | 1.0419602  | 1.034611   | 1.0192407  | TRIADDRAFT_ | XM_002109500.1 |
| DM08255P3 | 0.9341111  | -1.1643013 | 1.002453   | 1.0840993  |             |                |
| DM12922P3 | 0.93412447 | 1.05641    | 1.058137   | 1.1137792  | DWIL\GK173: | XM_002062116.1 |
| DM08293P3 | 0.934146   | -1.0812418 | -1.0563216 | -1.0175039 |             |                |
| DM04316P1 | 0.93434095 | 1.2515066  | 1.2095999  | 1.0736134  |             |                |
| DM05534P1 | 0.9345054  | 1.1296581  | 1.0389966  | 1.1640973  |             |                |
| DM14947P3 | 0.93455637 | -1.0021206 | -1.0113755 | 1.0542188  |             |                |
| DM15287P2 | 0.9345659  | -1.0279365 | 1.1276727  | 1.0093161  |             |                |
| DM09813P3 | 0.93458694 | -1.0922954 | -1.03324   | -1.1475769 |             |                |
| DM10882P1 | 0.9345963  | 1.063779   | -1.1238464 | 1.0208396  |             |                |
| DM00763P2 | 0.9347886  | -1.0179764 | 1.040564   | 1.0945342  | DSIM\GD237: | XM_002078933.1 |
| DM07002P1 | 0.93495685 | -1.0063522 | 1.0219717  | 1.0091827  |             |                |
| DM09449P1 | 0.9349969  | -1.0152946 | 1.0256021  | -1.0264244 |             |                |
| DM00040P2 | 0.93511695 | -1.0355139 | -1.0139775 | -1.0804428 | DSIM\GD237: | XM_002078933.1 |
| DM02853P4 | 0.9352513  | -1.0158169 | -1.0401852 | -1.1175727 | CG40045     | NM_001043175.1 |
| DM13096P3 | 0.93527776 | -1.040809  | -1.1021279 | -1.0569826 |             |                |
| DM09113P3 | 0.9353237  | -1.0199996 | -1.0740646 | -1.0274308 |             |                |
| DM05643P3 | 0.93553865 | 1.0033553  | 1.1626332  | 1.1040001  |             |                |
| DM01387P2 | 0.9357246  | 1.0229012  | 1.0710689  | 1.0192727  | BIRC2       | NM_001093264.1 |
| DM04265P3 | 0.9361492  | 1.2570142  | 1.4102263  | 1.2077155  | LOC1000278: | XM_001378019.1 |
| DM11667P1 | 0.93622077 | -1.0547688 | 1.0932992  | 1.0788386  |             |                |
| DM07593P1 | 0.9362801  | -1.080839  | -1.0679871 | -1.0962747 |             |                |
| DM01599P2 | 0.93642443 | -1.0284511 | -1.0552502 | -1.0434351 | LOC732958   | NM_001046956.1 |
| DM02652P1 | 0.93643457 | 1.0232931  | -1.0554352 | 1.0041846  |             |                |
| DM14083P3 | 0.9364854  | -1.0630705 | -1.1374464 | -1.1741153 |             |                |
| DM10921P1 | 0.9365957  | 1.1758676  | 1.2410471  | 1.1103988  |             |                |
| DM09389P3 | 0.93668276 | -1.072886  | -1.1563958 | 1.2000558  |             |                |
| DM09966P3 | 0.9367713  | 1.0368885  | 1.0484725  | -1.0330683 |             |                |
| DM02272P3 | 0.9368006  | -1.0922537 | -1.1406947 | 1.0190166  | GSPATT0001: | XM_001450697.1 |
| DM11075P1 | 0.93682414 | 1.3304245  | 1.1370966  | 1.1447024  |             |                |
| DM06272P2 | 0.93688464 | -1.0134234 | -1.0179453 | -1.0651971 |             |                |
| DM00562P1 | 0.93708843 | -1.0638201 | 1.020213   | -1.0578024 | DRAP1       | NM_205541.1    |
| DM09646P1 | 0.9371764  | 1.0288123  | -1.0482765 | 1.0899614  |             |                |
| DM08451P2 | 0.93750125 | 1.0477312  | 1.1204149  | 1.0227872  |             |                |
| DM08926P2 | 0.93750566 | 1.1720867  | 1.1926925  | 1.1472837  |             |                |
| DM01931P1 | 0.9375452  | -1.1031853 | 1.1240073  | -1.013919  | LOC413110   | XM_396561.1    |
| DM07257P1 | 0.93786204 | -1.0514457 | -1.0030143 | 1.0685463  |             |                |
| DM13495P3 | 0.93792754 | 1.0648934  | 1.013241   | -1.0177816 |             |                |

|           |            |            |            |            |             |                |
|-----------|------------|------------|------------|------------|-------------|----------------|
| DM14628P4 | 0.9380024  | -1.0644348 | -1.0846949 | -1.1489068 |             |                |
| DM11282P2 | 0.9383795  | -1.1017377 | -1.034718  | -1.0981274 |             |                |
| DM11818P1 | 0.93847793 | -1.0308746 | 1.1494553  | 1.1395247  |             |                |
| DM02512P1 | 0.93852085 | -1.0093306 | -1.0321505 | -1.1079702 | COQ10B      | XM_516007.2    |
| DM13068P1 | 0.93873245 | -1.0818509 | -1.0776566 | -1.1072332 |             |                |
| DM01313P1 | 0.9388391  | -1.1939436 | 1.010681   | -1.0552175 | EMID2       | NM_024474.2    |
| DM00882P1 | 0.93886733 | 1.0168743  | -1.0909699 | 1.0016627  | DGRIV\GH230 | XM_001995258.1 |
| DM03271P1 | 0.9390126  | -1.0200913 | 1.0276543  | -1.1892921 |             |                |
| DM08049P1 | 0.9391432  | -1.0231266 | -1.1399915 | 1.0042813  |             |                |
| DM11595P2 | 0.9391503  | -1.0637916 | -1.0288268 | -1.0522361 |             |                |
| DM10308P4 | 0.9391626  | 1.0078466  | -1.0807722 | -1.1741897 |             |                |
| DM00308P4 | 0.9392492  | 1.0013796  | -1.0286001 | 1.022555   | NEDD4       | XM_395191.3    |
| DM14778P3 | 0.93935215 | 1.0455455  | 1.0707324  | 1.1060677  |             |                |
| DM00574P1 | 0.9393776  | -1.0452224 | -1.0200095 | 1.1517015  | TUB         | XM_001656493.1 |
| DM12947P1 | 0.93957305 | 1.0655442  | 1.0494431  | 1.0400879  |             |                |
| DM03704P3 | 0.9395962  | -1.0093411 | -1.011319  | -1.0451913 |             |                |
| DM12991P2 | 0.9396617  | 1.0410953  | 1.0661457  | -1.0608473 |             |                |
| DM03871P3 | 0.93991476 | -1.1164199 | -1.0939994 | -1.0982627 | LOC412363   | XM_395824.3    |
| DM09201P3 | 0.93999267 | -1.0478451 | -1.0098268 | -1.0731455 |             |                |
| DM04810P1 | 0.94000053 | -1.0308788 | -1.0711721 | 1.0332994  |             |                |
| DM00148P1 | 0.94000244 | -1.0263842 | -1.0341619 | -1.0549968 | BRAFLDRAFT  | XM_002588075.1 |
| DM05941P1 | 0.94000953 | 1.0187893  | 1.0328484  | -1.0022659 |             |                |
| DM05374P1 | 0.94029534 | 1.0269638  | 1.0330498  | -1.0042533 |             |                |
| DM03488P1 | 0.9403164  | 1.0655408  | -1.0143138 | -1.0545199 |             |                |
| DM05333P1 | 0.9404201  | -1.2039193 | 1.0169066  | -1.0444514 |             |                |
| DM13464P2 | 0.9404681  | -1.022666  | -1.0637032 | -1.0604099 |             |                |
| DM06999P3 | 0.94068325 | -1.0710618 | -1.0517964 | -1.0064436 |             |                |
| DM04022P1 | 0.9407084  | -1.0348109 | -1.1147767 | -1.0647025 | LOC587847   | XM_787557.2    |
| DM04321P1 | 0.94071895 | -1.0210046 | 1.075093   | -1.02276   |             |                |
| DM11831P3 | 0.9407233  | 1.1220181  | 1.0631762  | -1.000081  |             |                |
| DM09562P3 | 0.9410621  | -1.0440121 | 1.0016118  | -1.077319  |             |                |
| DM10023P2 | 0.9412786  | -1.1024443 | -1.0393507 | -1.0533133 |             |                |
| DM10969P2 | 0.94131565 | -1.1212832 | -1.1451056 | -1.0292803 |             |                |
| DM01627P1 | 0.9414976  | 1.008516   | 1.001123   | -1.0155979 | DMOJ\GI2152 | XM_002010722.1 |
| DM04994P1 | 0.941635   | -1.0345683 | -1.0274317 | -1.1415172 |             |                |
| DM10458P1 | 0.941977   | 1.0464206  | 1.010242   | 1.0700449  |             |                |
| DM04809P1 | 0.94200534 | -1.0424352 | -1.0177104 | 1.0234144  |             |                |
| DM02547P4 | 0.94200927 | -1.0361036 | -1.0425748 | -1.030025  | LOC1002289  | XM_002190411.1 |
| DM12109P1 | 0.94219625 | -1.1198984 | -1.0578719 | -1.1449784 |             |                |
| DM08477P3 | 0.94224745 | -1.0473024 | 1.0166616  | 1.1779443  |             |                |
| DM04222P3 | 0.94229037 | 1.0533108  | 1.0504564  | -1.0179952 |             |                |
| DM14977P3 | 0.9430887  | 1.0022305  | 1.0804489  | 1.0175933  |             |                |
| DM10299P1 | 0.9431469  | -1.0932395 | -1.1051706 | -1.1416644 |             |                |
| DM14240P2 | 0.9433127  | -1.0571284 | 1.0756191  | -1.0622298 |             |                |
| DM01973P1 | 0.9433373  | 1.081732   | -1.041119  | 1.0162606  | LOC592480   | XM_792000.2    |
| DM12019P1 | 0.9433842  | 1.0168809  | 1.0222971  | 1.1423717  |             |                |
| DM15285P1 | 0.94370097 | 1.0751307  | 1.0077863  | 1.0027264  |             |                |
| DM07508P1 | 0.94376785 | 1.0239625  | -1.1463592 | -1.1083913 |             |                |
| DM06626P2 | 0.9437824  | -1.2338262 | -1.02671   | 1.2026405  |             |                |
| DM13866P2 | 0.9439252  | 1.0063262  | 1.1107886  | 1.1207182  |             |                |

|           |            |            |            |            |                           |
|-----------|------------|------------|------------|------------|---------------------------|
| DM03321P1 | 0.9440702  | -1.1585345 | -1.0929534 | 1.0180882  | OSTLU_5014:XM_001418834.1 |
| DM05988P3 | 0.9442     | -1.0093572 | -1.0412909 | -1.0282617 | LOC410396 XM_393876.3     |
| DM08815P1 | 0.9442681  | 1.2112162  | 1.1111636  | 1.081127   |                           |
| DM05940P2 | 0.9442973  | -1.056879  | -1.0272577 | -1.0541122 | TMEM50A XM_001138153.1    |
| DM10809P2 | 0.94436526 | 1.073056   | 1.039583   | 1.0304348  |                           |
| DM06637P1 | 0.94450384 | 1.0906384  | 1.0198783  | 1.109211   | LOC1001196:XM_001603320.1 |
| DM06207P1 | 0.944568   | 1.0197412  | -1.046411  | 1.0202878  | LOC732924 NM_001046924.1  |
| DM09619P3 | 0.94517213 | -1.0957342 | 1.0435948  | -1.0221361 |                           |
| DM13816P3 | 0.945276   | -1.0535529 | 1.0467616  | -1.037629  |                           |
| DM03953P3 | 0.9456089  | -1.0158411 | 1.0410124  | 1.0769335  |                           |
| DM08989P2 | 0.94563496 | -1.0554559 | 1.0710585  | -1.0649897 |                           |
| DM01076P3 | 0.9459652  | -1.014432  | -1.0574658 | -1.0857904 | LOC659839 XM_966107.1     |
| DM15007P1 | 0.9461533  | 1.0410669  | 1.0118088  | 1.066382   | NCU07218 XM_952350.1      |
| DM10932P1 | 0.9462778  | 1.0712049  | 1.0540197  | 1.0636184  |                           |
| DM11349P1 | 0.94631064 | -1.0822003 | -1.0733426 | -1.1020747 |                           |
| DM03004P1 | 0.9465242  | 1.0009413  | -1.0234133 | -1.0267844 |                           |
| DM10327P3 | 0.94660705 | 1.1465772  | -1.0764811 | 1.0605929  |                           |
| DM15033P1 | 0.94667953 | -1.0154363 | 1.0523651  | 1.0497746  |                           |
| DM08069P1 | 0.9467364  | -1.0065417 | -1.0028163 | 1.0416356  |                           |
| DM09923P1 | 0.9467926  | 1.1193521  | 1.1212918  | 1.161944   |                           |
| DM13725P2 | 0.94680417 | 1.0452434  | 1.0024164  | 1.0062358  |                           |
| DM05730P2 | 0.94699985 | 1.0269859  | 1.0207653  | 1.0168873  |                           |
| DM08682P2 | 0.9470122  | -1.0255781 | 1.0214907  | 1.0085151  | PB000119.00 XM_672004.1   |
| DM02528P1 | 0.9472931  | -1.0589999 | -1.0574747 | 1.0068982  | LOC733113 NM_001047060.1  |
| DM04479P2 | 0.9475273  | -1.0337925 | -1.0943383 | -1.0229019 |                           |
| DM12005P1 | 0.9475505  | -1.0397525 | -1.1006387 | -1.0668217 |                           |
| DM13721P2 | 0.9477201  | -1.0543904 | 1.0727596  | 1.1030366  |                           |
| DM14031P2 | 0.94772255 | 1.047621   | 1.0209955  | 1.0170231  |                           |
| DM14152P2 | 0.9482207  | 1.039729   | -1.0058167 | 1.0239495  |                           |
| DM10811P1 | 0.9484745  | 1.1386318  | 1.0926689  | 1.014225   |                           |
| DM08447P1 | 0.94872606 | 1.2265323  | 1.057558   | 1.1362559  |                           |
| DM03075P1 | 0.94883287 | -1.0867478 | 1.0098279  | -1.0084907 | LOC1000309:XM_001380304.1 |
| DM10500P1 | 0.94887835 | 1.0279799  | -1.1075114 | -1.0888102 |                           |
| DM14574P1 | 0.9489881  | -1.0879539 | -1.0222709 | 1.1344904  |                           |
| DM05669P2 | 0.9491828  | 1.0898371  | 1.0291597  | 1.0810579  |                           |
| DM00661P3 | 0.9494776  | -1.0458642 | -1.0966461 | 1.0205657  |                           |
| DM10679P1 | 0.9495419  | 1.0894437  | 1.0442439  | -1.0148132 |                           |
| DM05985P1 | 0.9495745  | 1.0408317  | -1.039969  | -1.0541599 |                           |
| DM00880P3 | 0.9496483  | -1.0553182 | 1.047041   | -1.1561791 | ASAH2 NM_001007763.1      |
| DM02797P1 | 0.9496808  | -1.0440129 | -1.0714978 | -1.0302877 |                           |
| DM13601P4 | 0.95001996 | 1.1383896  | 1.0074098  | -1.060151  |                           |
| DM12256P2 | 0.9500598  | -1.0054829 | -1.0280023 | -1.0243495 |                           |
| DM03751P4 | 0.95009565 | -1.0886954 | -1.1169642 | -1.1869813 |                           |
| DM05527P1 | 0.9504758  | -1.0077716 | -1.0356083 | 1.0805693  |                           |
| DM09603P3 | 0.9504776  | -1.0273961 | -1.0567062 | -1.132774  | SYTI NM_001160200.1       |
| DM03532P3 | 0.9507842  | 1.01972    | -1.0166322 | -1.0097507 |                           |
| DM02050P3 | 0.9510333  | -1.0182458 | -1.0302811 | -1.015592  | LOC494642 NM_001094490.1  |
| DM08272P1 | 0.9514455  | -1.015027  | 1.0099975  | 1.014455   |                           |
| DM08916P2 | 0.9515681  | -1.0991073 | -1.0501137 | 1.0030242  | PGI NM_165636.1           |
| DM10205P1 | 0.95161927 | -1.1096451 | 1.0169672  | -1.1187747 |                           |

|           |            |            |            |            |            |                |
|-----------|------------|------------|------------|------------|------------|----------------|
| DM14594P3 | 0.95162046 | 1.0326132  | 1.0019306  | 1.060709   |            |                |
| DM11521P3 | 0.9516556  | -1.1812451 | -1.0443836 | -1.0718788 |            |                |
| DM07680P3 | 0.95172614 | 1.0430586  | -1.083682  | 1.0835329  |            |                |
| DM14360P1 | 0.9519784  | -1.0215746 | -1.0719731 | -1.0654616 |            |                |
| DM03448P1 | 0.9523758  | 1.1229198  | -1.0009475 | 1.0498675  |            |                |
| DM06614P1 | 0.9525218  | -1.03897   | 1.0351301  | -1.1341939 |            |                |
| DM09097P3 | 0.9525491  | -1.0351237 | -1.0640965 | -1.091305  |            |                |
| DM04728P1 | 0.9526063  | 1.0111653  | 1.1023446  | 1.0187198  | LOC551653  | XM_624043.2    |
| DM02552P3 | 0.95267886 | -1.1085614 | 1.0216919  | -1.0825689 | LOC657915  | XM_964341.2    |
| DM14531P1 | 0.95274526 | -1.0051191 | 1.104278   | 1.0156037  |            |                |
| DM03047P2 | 0.95281833 | 1.0694611  | 1.1787102  | -1.027846  |            |                |
| DM08298P1 | 0.9528221  | 1.0393046  | 1.0762953  | 1.1462988  |            |                |
| DM10726P2 | 0.9528831  | 1.0051265  | 1.0850564  | 1.0252254  |            |                |
| DM02515P3 | 0.953023   | 1.1200863  | 1.006351   | 1.0524385  |            |                |
| DM01650P3 | 0.953181   | -1.1207222 | -1.153213  | -1.1777197 | LOC576726  | XM_777001.2    |
| DM05050P1 | 0.9532055  | -1.0472713 | -1.0182613 | -1.0452355 |            |                |
| DM04256P3 | 0.95335674 | 1.0171391  | -1.1795996 | 1.0740949  | LOC1000878 | XM_001517660.1 |
| DM01888P2 | 0.9535859  | 1.0905899  | 1.1011314  | 1.1197114  | NEMVEDRAFT | XM_001633433.1 |
| DM01390P3 | 0.9535908  | -1.0599359 | -1.0122719 | 1.0077405  | LOC655128  | XM_961637.2    |
| DM01734P2 | 0.95359117 | -1.0214095 | -1.0140843 | -1.048496  | UQCRFS1    | NM_001172339.1 |
| DM01925P1 | 0.9537522  | 1.0277467  | 1.0200028  | -1.0396663 | HGD        | NR_027778.1    |
| DM04444P1 | 0.9539229  | 1.0076711  | 1.0101104  | 1.0525836  |            |                |
| DM11827P4 | 0.9541917  | 1.0706375  | 1.0505111  | 1.041113   | SULT1C3    | XM_001134662.1 |
| DM08318P2 | 0.9542461  | -1.0105932 | -1.0188798 | 1.0197287  |            |                |
| DM03790P2 | 0.9543717  | -1.0308138 | -1.0710033 | -1.0253555 | AT4G28570  | NM_118999.3    |
| DM02715P4 | 0.95439976 | 1.0423474  | 1.0531522  | 1.0768573  | LOC1002092 | XM_002156138.1 |
| DM13758P3 | 0.9544712  | -1.0562347 | 1.0809526  | 1.0495815  |            |                |
| DM09750P3 | 0.95452315 | -1.0281538 | 1.0371547  | -1.0215384 |            |                |
| DM14037P1 | 0.95472866 | 1.0851555  | -1.0503501 | 1.0602682  |            |                |
| DM10330P2 | 0.9547448  | 1.1179383  | 1.2393274  | 1.079303   |            |                |
| DM12513P4 | 0.9548371  | -1.0089942 | -1.0759503 | -1.0710299 |            |                |
| DM13593P1 | 0.9549528  | -1.1940252 | -1.1204572 | -1.1158704 |            |                |
| DM10060P1 | 0.95513356 | 1.0416322  | -1.0214027 | 1.0277592  | LOC1002088 | XM_002155416.1 |
| DM02467P1 | 0.95513994 | -1.0472944 | 1.0051116  | 1.069499   | LOC552145  | XM_624524.2    |
| DM10463P4 | 0.9551415  | -1.015062  | 1.0906724  | 1.0445797  |            |                |
| DM11650P2 | 0.9551557  | 1.0049007  | 1.0260994  | -1.0609367 |            |                |
| DM03688P1 | 0.9554491  | 1.1399118  | 1.122352   | 1.0899341  |            |                |
| DM05105P2 | 0.9557409  | -1.1306899 | -1.1522216 | -1.0293602 |            |                |
| DM03785P3 | 0.9557685  | 1.0668523  | 1.0513328  | 1.1595716  |            |                |
| DM04987P1 | 0.9561107  | 1.1074156  | 1.0681268  | 1.1619967  |            |                |
| DM01293P1 | 0.9561296  | -1.1026387 | 1.0503082  | 1.0234303  | DWIL\GK248 | XM_002067036.1 |
| DM06217P3 | 0.95621574 | 1.0224521  | -1.0238113 | -1.0555923 |            |                |
| DM05801P3 | 0.9562809  | -1.0525557 | 1.0011371  | -1.0052116 |            |                |
| DM11577P3 | 0.95648396 | 1.0505329  | 1.0134678  | -1.0074744 |            |                |
| DM08961P1 | 0.95658934 | 1.0367342  | -1.0211277 | 1.0317748  |            |                |
| DM06512P3 | 0.95659816 | -1.0097685 | -1.0234956 | 1.0004383  | DSIM\GD157 | XM_002107049.1 |
| DM03199P4 | 0.95659935 | 1.0380507  | 1.0126512  | 1.1530951  | LOC1001141 | XM_001598967.1 |
| DM10767P3 | 0.9566066  | 1.0509346  | 1.0965911  | 1.0909663  | DWIL\GK248 | XM_002067036.1 |
| DM09767P2 | 0.95662045 | -1.0007149 | -1.0473933 | 1.0152005  |            |                |
| DM13975P2 | 0.9567738  | -1.0707377 | -1.0290729 | -1.0138775 |            |                |

|           |            |            |            |            |                           |
|-----------|------------|------------|------------|------------|---------------------------|
| DM10250P3 | 0.95682853 | -1.0197414 | 1.0045098  | -1.2095042 | DWIL\GK181\XM_002066383.1 |
| DM09621P2 | 0.9570609  | -1.0488268 | 1.0450978  | 1.1097202  |                           |
| DM11555P3 | 0.95716894 | -1.1121205 | -1.0849584 | -1.123674  |                           |
| DM12864P1 | 0.95723754 | 1.0045758  | -1.0225928 | -1.0650715 |                           |
| DM14962P1 | 0.957326   | 1.0419282  | 1.0160753  | -1.0205007 |                           |
| DM00942P3 | 0.957397   | -1.119741  | -1.1063188 | -1.0850052 | LOC1001851\XM_002122737.1 |
| DM12822P4 | 0.95743316 | -1.0473595 | -1.0377853 | -1.0883696 |                           |
| DM01404P2 | 0.9574519  | 1.0352951  | 1.0532801  | -1.004043  | PRKRIP1 NM_001161897.1    |
| DM04281P4 | 0.9575148  | 1.021278   | -1.0283822 | 1.0639235  |                           |
| DM00605P4 | 0.95757043 | -1.105759  | -1.0247258 | -1.0895193 | AAEL_AAEL\XM_001654119.1  |
| DM13657P2 | 0.9577139  | 1.0290864  | -1.0150115 | 1.0758457  |                           |
| DM00230P2 | 0.9577202  | -1.0023457 | -1.0079219 | 1.0444155  | AAEL_AAEL\XM_001651898.1  |
| DM07100P1 | 0.9580746  | -1.0661386 | -1.0076976 | -1.0477638 |                           |
| DM00634P3 | 0.95815426 | -1.1239597 | -1.1728046 | -1.1139553 | DERE\GG203 XM_001980078.1 |
| DM14311P4 | 0.95818514 | -1.0500461 | -1.0184069 | -1.0649117 |                           |
| DM04575P4 | 0.9582636  | -1.0611594 | -1.144953  | -1.1667869 |                           |
| DM05607P2 | 0.9583568  | -1.0074111 | -1.0092969 | -1.0353894 |                           |
| DM03586P3 | 0.9584568  | -1.0391723 | 1.10248    | 1.0173936  | TFIIB XM_395432.3         |
| DM08390P3 | 0.9585366  | -1.115373  | -1.2120357 | -1.0914477 |                           |
| DM13470P1 | 0.9586365  | -1.2064435 | -1.0801032 | -1.0821246 |                           |
| DM01410P1 | 0.9587977  | -1.001177  | -1.0142871 | -1.0708843 | DSEC\GM167 XM_002041509.1 |
| DM12111P2 | 0.95883733 | -1.040729  | 1.0750136  | 1.0268734  |                           |
| DM10734P1 | 0.9589241  | -1.1244881 | 1.0233188  | -1.0785693 |                           |
| DM02867P2 | 0.95894176 | -1.009703  | -1.0558654 | -1.1397363 |                           |
| DM08339P2 | 0.95898557 | 1.031764   | 1.0464029  | 1.0852149  |                           |
| DM08690P1 | 0.9590174  | -1.1314406 | -1.2154425 | -1.1095929 |                           |
| DM04366P1 | 0.9590977  | 1.0581921  | 1.0040244  | 1.0583596  | CYP2U1 XM_782373.2        |
| DM00249P2 | 0.95920855 | 1.0247688  | 1.0493972  | 1.0847303  | LOC657452 XM_963912.1     |
| DM03864P2 | 0.95921427 | -1.0491285 | -1.0286903 | 1.0045855  |                           |
| DM10102P1 | 0.9593948  | -1.1142915 | 1.0628357  | -1.0504757 |                           |
| DM09900P1 | 0.9595134  | 1.0409417  | 1.06825    | -1.0198873 |                           |
| DM03398P1 | 0.9598332  | 1.1188004  | 1.0326207  | 1.1589378  |                           |
| DM04186P1 | 0.9600198  | -1.0108584 | -1.0681807 | 1.0328681  |                           |
| DM08009P2 | 0.9600434  | -1.0000063 | -1.093819  | 1.1044123  |                           |
| DM00068P2 | 0.9601795  | -1.0112534 | 1.0519542  | 1.0688553  | DYAK\GE172\XM_002100713.1 |
| DM11126P1 | 0.96037984 | 1.0194087  | -1.0313822 | 1.008418   |                           |
| DM04291P4 | 0.960407   | 1.1467513  | 1.0864842  | 1.1462116  |                           |
| DM05802P1 | 0.96046394 | -1.0086483 | -1.0020496 | 1.078885   |                           |
| DM00894P1 | 0.9605979  | -1.0342336 | -1.1163127 | -1.0543422 |                           |
| DM04872P1 | 0.96067506 | -1.0115807 | -1.0102594 | -1.0495857 |                           |
| DM06896P3 | 0.9606991  | 1.0177187  | -1.1156313 | -1.1741952 |                           |
| DM10415P1 | 0.96074194 | 1.0412663  | 1.0737442  | 1.0737802  |                           |
| DM00016P1 | 0.9607927  | 1.0740092  | -1.0013462 | 1.0030222  | AAEL_AAEL\XM_001659470.1  |
| DM07289P2 | 0.9608899  | -1.0076834 | -1.02323   | -1.040406  |                           |
| DM10125P2 | 0.96103406 | 1.0992974  | 1.1278555  | 1.112325   |                           |
| DM06082P2 | 0.96103597 | 1.0313292  | 1.0120783  | -1.0247082 |                           |
| DM13851P3 | 0.96107745 | -1.1820918 | -1.13947   | -1.0217968 |                           |
| DM07371P3 | 0.96114135 | 1.0375687  | 1.0271497  | -1.0138826 |                           |
| DM03077P1 | 0.96121585 | -1.0272691 | -1.0227636 | -1.0479817 | MDH2 NM_008617.2          |
| DM06160P3 | 0.9614817  | 1.1321667  | 1.2337462  | 1.1051537  | DANA\GF126 XM_001958992.1 |



|           |            |            |            |            |                             |
|-----------|------------|------------|------------|------------|-----------------------------|
| DM03064P3 | 0.96173793 | 1.0295132  | -1.041781  | -1.0385082 | LOC1001353(NM_001114039.2   |
| DM14948P4 | 0.9617506  | 1.0054034  | -1.0405365 | -1.0377574 |                             |
| DM05722P1 | 0.96177346 | -1.1168448 | 1.0261189  | 1.0055776  |                             |
| DM04235P1 | 0.96185106 | -1.035966  | -1.0062181 | -1.0313265 | LOC559627 XM_678531.3       |
| DM00662P1 | 0.9620333  | 1.0540208  | 1.0070013  | 1.0034246  | DVIR\GJ1362 XM_002047751.1  |
| DM15336P1 | 0.96213615 | -1.0096123 | -1.0744034 | 1.0095237  |                             |
| DM07370P2 | 0.9622291  | 1.0664182  | -1.0075145 | -1.0246037 |                             |
| DM06580P3 | 0.9625008  | -1.0799198 | -1.0315578 | -1.08557   |                             |
| DM07734P1 | 0.9625371  | 1.0627686  | -1.0680254 | 1.0348146  |                             |
| DM07663P3 | 0.9627645  | -1.0576423 | -1.0063024 | -1.027529  |                             |
| DM10473P2 | 0.96278095 | 1.064013   | -1.0247331 | 1.0104371  |                             |
| DM05127P3 | 0.9629906  | -1.1115896 | -1.2246906 | -1.0197659 |                             |
| DM06012P3 | 0.9632042  | 1.0664847  | 1.0682567  | -1.0306883 |                             |
| DM14515P3 | 0.9632896  | -1.2215626 | -1.0083687 | -1.2471957 |                             |
| DM06254P1 | 0.9633209  | 1.0004504  | -1.036329  | 1.0405048  |                             |
| DM08808P4 | 0.96332234 | 1.1133815  | 1.2069952  | 1.198959   |                             |
| DM09992P3 | 0.96344614 | 1.0241368  | -1.0771503 | 1.011961   |                             |
| DM03530P1 | 0.9637396  | -1.1110619 | -1.0300564 | -1.145862  | NEMVEDRAFT XM_001640486.1   |
| DM04751P1 | 0.9639718  | -1.0225362 | 1.0194068  | 1.055883   |                             |
| DM12627P3 | 0.9639791  | 1.0030867  | 1.0857301  | -1.027289  |                             |
| DM14928P1 | 0.96409917 | 1.0193448  | -1.0323843 | -1.0472817 |                             |
| DM14732P3 | 0.9641935  | 1.0721158  | 1.0566347  | 1.0432688  |                             |
| DM12841P1 | 0.96419626 | 1.0015757  | -1.0386297 | -1.0693728 |                             |
| DM02175P2 | 0.96425223 | -1.0514603 | -1.0724915 | -1.0371667 |                             |
| DM14410P1 | 0.9644587  | -1.0782167 | -1.0039065 | -1.014625  |                             |
| DM02537P4 | 0.9644651  | 1.0980064  | 1.0416001  | 1.1024386  | LOC451764 XM_508940.2       |
| DM07938P1 | 0.9645156  | -1.0842166 | -1.0645213 | -1.0452183 |                             |
| DM05774P1 | 0.9647514  | -1.1828809 | -1.1692489 | -1.238173  |                             |
| DM09922P1 | 0.9647518  | -1.0086519 | -1.1860211 | -1.1424446 |                             |
| DM14027P1 | 0.96485734 | -1.0495502 | -1.1043911 | -1.0482863 | PKH_011570 XM_002257617.1   |
| DM05526P1 | 0.96487355 | 1.0526172  | -1.0342466 | -1.0668772 |                             |
| DM13227P1 | 0.9649088  | 1.0950804  | 1.1643851  | 1.1213123  |                             |
| DM14834P3 | 0.96503896 | 1.0153819  | -1.081927  | 1.0189584  |                             |
| DM13353P4 | 0.96518433 | -1.1340067 | -1.1148192 | -1.0849323 |                             |
| DM04451P1 | 0.9652714  | -1.0758847 | 1.0103654  | -1.1698978 |                             |
| DM04546P3 | 0.9653436  | -1.0130316 | 1.0141196  | 1.1010288  | CPIPJ_CPIJ01 XM_001864429.1 |
| DM12258P3 | 0.96541893 | -1.044229  | -1.0335009 | 1.0106862  |                             |
| DM03038P3 | 0.9655163  | 1.0238699  | 1.0317576  | -1.0984088 |                             |
| DM14319P2 | 0.9656936  | 1.0153161  | 1.0223427  | -1.0336218 |                             |
| DM12463P3 | 0.9657722  | 1.0128545  | 1.1442505  | 1.0880526  |                             |
| DM10927P1 | 0.9662076  | -1.0515382 | -1.0388976 | 1.0166103  | PY03308 XM_726211.1         |
| DM14899P2 | 0.9662469  | -1.0253519 | -1.0962632 | -1.0662211 |                             |
| DM14334P1 | 0.96634585 | -1.066355  | -1.0801482 | -1.075028  |                             |
| DM07225P2 | 0.9663588  | 1.0099225  | -1.1369652 | -1.0324094 |                             |
| DM05143P2 | 0.96642977 | -1.246026  | -1.0188118 | -1.1236265 |                             |
| DM02428P2 | 0.9664666  | -1.071895  | -1.0569613 | -1.0143863 | DPSE\GA288(XM_002134012.1   |
| DM13151P2 | 0.9664996  | -1.0154165 | -1.0869443 | -1.006361  |                             |
| DM00601P1 | 0.96655333 | -1.0688602 | 1.0264263  | -1.0314058 | NAGA XM_001650856.1         |
| DM15322P3 | 0.9672839  | -1.0023661 | 1.014365   | -1.1033037 |                             |
| DM01814P1 | 0.96733636 | -1.2228096 | -1.1271493 | -1.066541  | AAEL_AAEL0C XM_001657732.1  |

|           |            |            |            |            |                            |
|-----------|------------|------------|------------|------------|----------------------------|
| DM09804P2 | 0.96754074 | 1.0385969  | 1.0507319  | 1.0381745  | LOC1001780:XM_002128908.1  |
| DM04580P2 | 0.96767366 | -1.0310856 | 1.018387   | -1.0280619 |                            |
| DM05683P1 | 0.9676856  | -1.0076923 | -1.1182113 | -1.0781647 |                            |
| DM01141P3 | 0.9678679  | 1.0323869  | 1.0179099  | -1.0156851 |                            |
| DM08296P2 | 0.96791303 | -1.0177524 | -1.0391046 | -1.0045733 |                            |
| DM06705P1 | 0.9683352  | 1.0871861  | -1.0879301 | -1.0225712 | RPL19 NM_001043756.4       |
| DM07807P4 | 0.96845275 | -1.0773718 | -1.0318346 | 1.1211845  |                            |
| DM03979P1 | 0.96863353 | 1.008398   | 1.010706   | -1.0329479 |                            |
| DM13848P1 | 0.96865034 | -1.021366  | -1.0698018 | -1.2070965 |                            |
| DM11569P4 | 0.9688185  | 1.0350765  | 1.0197703  | -1.0003821 |                            |
| DM07437P3 | 0.9688431  | -1.0510567 | -1.012082  | -1.016988  |                            |
| DM08352P1 | 0.96885544 | -1.0111631 | -1.0074997 | 1.0270276  |                            |
| DM04076P1 | 0.96889436 | 1.0319861  | 1.1091346  | -1.0126587 | LOC1002074:XM_002167925.1  |
| DM02160P1 | 0.9690217  | -1.0767926 | -1.1265066 | -1.1408403 | LOC576659 XM_776942.2      |
| DM01812P1 | 0.969024   | -1.0284721 | -1.0633919 | 1.0471401  |                            |
| DM00430P3 | 0.96910113 | 1.0226309  | 1.0639176  | -1.0082941 | DMOJ\GI105\XM_002001045.1  |
| DM07494P3 | 0.96919334 | 1.0819552  | 1.1809033  | -1.021399  | DVIR\GJ2018 XM_002050439.1 |
| DM05728P3 | 0.96930844 | -1.0300362 | -1.0435609 | -1.0437701 |                            |
| DM03786P1 | 0.9693582  | -1.0114517 | 1.0776914  | 1.0246627  |                            |
| DM04029P3 | 0.9698032  | -1.0932832 | -1.0771471 | -1.0896965 |                            |
| DM10044P1 | 0.9699259  | -1.0921865 | -1.0411187 | 1.0088755  |                            |
| DM06360P3 | 0.9700061  | -1.0402863 | -1.0205048 | -1.0286474 |                            |
| DM03831P3 | 0.9700312  | 1.0282999  | 1.032621   | 1.031758   |                            |
| DM13627P1 | 0.97019917 | -1.0648327 | 1.0030698  | -1.01464   |                            |
| DM00060P1 | 0.9701995  | -1.0346235 | -1.1112422 | -1.0399386 | LOC657804 XM_964239.2      |
| DM10170P3 | 0.9702986  | -1.0257988 | -1.0444765 | -1.0455122 |                            |
| DM08532P1 | 0.97033787 | 1.046776   | 1.0174332  | -1.022897  |                            |
| DM14780P1 | 0.9705583  | 1.0232834  | 1.0244092  | -1.0645419 |                            |
| DM03169P2 | 0.9709791  | 1.012188   | 1.0422148  | 1.0189335  | MAN2A1 NM_012979.2         |
| DM00709P3 | 0.97102034 | -1.1243807 | -1.0419798 | -1.0485718 | LOC1002123:XM_002157003.1  |
| DM00437P3 | 0.97108024 | -1.0071217 | 1.0175023  | 1.0145037  | DERE\GG174 XM_001980908.1  |
| DM01008P2 | 0.97110474 | -1.0385634 | -1.0120242 | -1.007189  |                            |
| DM11332P3 | 0.9712393  | -1.0278335 | 1.0854009  | -1.0536752 |                            |
| DM02318P3 | 0.97126484 | -1.0746489 | -1.0462685 | -1.1163882 | AAEL_AAEL01 XM_001660539.1 |
| DM06193P3 | 0.97132665 | -1.0561293 | -1.0282186 | 1.0000236  |                            |
| DM09940P1 | 0.97149086 | 1.0338483  | 1.0319142  | -1.004345  |                            |
| DM03461P1 | 0.9715175  | -1.0213894 | 1.0505567  | -1.0374088 |                            |
| DM01287P3 | 0.97151923 | 1.0387611  | 1.1587497  | 1.0786692  | DYAK\GE163:XM_002100013.1  |
| DM09220P2 | 0.97156096 | -1.066689  | -1.2057269 | -1.0191952 |                            |
| DM02991P1 | 0.97157437 | 1.0071112  | -1.0188205 | 1.0107925  |                            |
| DM00179P1 | 0.9716162  | -1.0204843 | -1.022332  | 1.0153522  | SNF1A XM_623368.2          |
| DM01895P1 | 0.97165966 | 1.1504138  | 1.0120469  | 1.1319395  | CUTICLE PRO XM_001659414.1 |
| DM07396P2 | 0.9716627  | -1.0042238 | 1.0109402  | -1.0153071 |                            |
| DM10749P1 | 0.9716656  | 1.0046338  | 1.0327173  | -1.0273334 |                            |
| DM05714P4 | 0.9716713  | 1.0631213  | 1.0641501  | -1.052003  |                            |
| DM12216P1 | 0.9716876  | -1.1734446 | -1.1598793 | -1.1216577 |                            |
| DM05531P4 | 0.97176903 | -1.0263098 | -1.032192  | 1.0260684  |                            |
| DM09148P2 | 0.9718245  | 1.0329223  | 1.0090067  | 1.0582092  |                            |
| DM02377P4 | 0.9720251  | -1.061079  | -1.0097336 | -1.0800017 | PMCA NM_001014687.3        |
| DM11582P3 | 0.9721969  | 1.1024877  | -1.0004189 | 1.043882   |                            |

|           |            |            |            |            |             |                |
|-----------|------------|------------|------------|------------|-------------|----------------|
| DM07716P1 | 0.97222966 | 1.0074565  | -1.0179508 | 1.0056775  |             |                |
| DM12552P1 | 0.9722837  | -1.014784  | 1.0170568  | -1.0087986 | LOC1002263  | XM_002187967.1 |
| DM06721P1 | 0.9722861  | -1.1241649 | 1.0364883  | -1.2056115 |             |                |
| DM08313P2 | 0.97254795 | -1.0438305 | -1.0200335 | -1.0047065 |             |                |
| DM15113P1 | 0.97256017 | -1.18825   | 1.0568596  | -1.2526308 |             |                |
| DM14001P3 | 0.9726253  | -1.0931008 | -1.024183  | -1.0636363 |             |                |
| DM06817P3 | 0.97297925 | 1.00548    | 1.0027277  | 1.1400207  |             |                |
| DM14036P1 | 0.973158   | 1.053255   | 1.0273432  | 1.0358362  |             |                |
| DM03317P2 | 0.9732317  | -1.009652  | 1.0402901  | 1.0001578  | DANA\GF162  | XM_001955434.1 |
| DM03803P1 | 0.9732911  | 1.0077996  | 1.0359238  | 1.0916315  | LOC1001755  | XM_002126682.1 |
| DM06863P2 | 0.9733147  | -1.1986014 | -1.1622199 | -1.2182083 |             |                |
| DM07089P1 | 0.9735127  | 1.0493847  | -1.0635666 | 1.0086247  |             |                |
| DM06175P4 | 0.9736002  | 1.0881261  | 1.050377   | 1.2361221  | COL1A2      | NM_182968.2    |
| DM01505P2 | 0.97363436 | 1.011203   | 1.0457883  | -1.0309411 | MORF4L1     | NM_024431.3    |
| DM07202P1 | 0.97369975 | -1.0379548 | -1.0595978 | -1.0040152 |             |                |
| DM13290P2 | 0.9737416  | -1.025404  | -1.0897741 | 1.0216063  |             |                |
| DM10021P3 | 0.9738258  | 1.0189329  | 1.0027175  | 1.1076689  | PNO1        | NM_001132205.1 |
| DM02539P2 | 0.97392476 | -1.0576065 | 1.0231144  | -1.0546811 | ACAD        | XM_001649695.1 |
| DM14674P1 | 0.9741138  | -1.0204979 | 1.107158   | -1.0259783 |             |                |
| DM10370P2 | 0.9743263  | 1.0703918  | 1.1284331  | -1.0596955 |             |                |
| DM08472P2 | 0.9747889  | 1.0214126  | 1.0397499  | 1.1009507  |             |                |
| DM09498P3 | 0.9749157  | -1.0538518 | -1.0222344 | -1.1288451 |             |                |
| DM15077P3 | 0.97507125 | -1.0292645 | -1.0197496 | -1.0461061 | AGAP_AGAP0  | XM_556301.3    |
| DM08413P3 | 0.9755823  | 1.0107777  | 1.0705419  | 1.019797   |             |                |
| DM05440P1 | 0.97558475 | -1.1099769 | -1.0722213 | -1.0253758 |             |                |
| DM06435P2 | 0.9756583  | 1.015219   | -1.1129686 | -1.0451182 |             |                |
| DM08441P1 | 0.9758105  | -1.0355655 | 1.06288    | -1.0302395 |             |                |
| DM09848P3 | 0.9759969  | 1.0251333  | 1.0297158  | 1.0010265  |             |                |
| DM09913P2 | 0.9762064  | 1.0163412  | 1.0033723  | -1.0457798 |             |                |
| DM12057P3 | 0.9762358  | 1.0496354  | 1.037296   | -1.0161839 |             |                |
| DM06037P2 | 0.9763684  | 1.0693295  | -1.0264264 | 1.045312   | DMOJ\GI120  | XM_002008065.1 |
| DM01012P1 | 0.9764488  | -1.0110781 | -1.0802495 | -1.0520815 | LOC1000181  | XM_001366183.1 |
| DM02191P2 | 0.97647876 | -1.0069318 | -1.1495787 | -1.1648808 | AAEL_AAEL01 | XM_001648682.1 |
| DM04068P2 | 0.976518   | -1.0538777 | 1.0773411  | 1.0265007  |             |                |
| DM10467P2 | 0.9765367  | -1.0083715 | -1.074248  | -1.0863752 |             |                |
| DM07018P1 | 0.97659296 | 1.0237968  | 1.0264056  | 1.005137   |             |                |
| DM13648P2 | 0.9766661  | -1.0253301 | 1.0116328  | -1.0173897 |             |                |
| DM00899P1 | 0.97667027 | -1.0122706 | 1.0001578  | -1.0271734 | DSIM\GD214  | XM_002105314.1 |
| DM01252P3 | 0.9767013  | -1.0163525 | 1.1648664  | 1.0199667  | NEMVEDRAFT  | XM_001621693.1 |
| DM05191P2 | 0.9769474  | -1.0236573 | 1.0339288  | 1.0627114  |             |                |
| DM08222P1 | 0.9770897  | -1.0221756 | -1.0588679 | 1.0370648  |             |                |
| DM11482P3 | 0.97714543 | -1.0143241 | -1.0478104 | -1.0067728 |             |                |
| DM01579P3 | 0.97718614 | 1.0201494  | -1.019696  | 1.0228703  | RPL18       | NM_001162209.1 |
| DM01808P2 | 0.9773032  | 1.0559969  | 1.0226579  | 1.0031344  | DPER\GL227  | XM_002024028.1 |
| DM02053P2 | 0.9773453  | 1.03703    | 1.0177549  | 1.0611567  | DERE\GG126  | XM_001982546.1 |
| DM04803P3 | 0.97753096 | 1.1599659  | 1.0376353  | 1.1446819  |             |                |
| DM09351P3 | 0.97762024 | 1.0508373  | 1.0633684  | 1.042937   |             |                |
| DM14695P2 | 0.9777117  | 1.0013149  | -1.0013183 | 1.0578216  |             |                |
| DM07368P1 | 0.97797173 | 1.144718   | 1.1036353  | 1.1499755  |             |                |
| DM13529P1 | 0.9780516  | 1.0166638  | 1.0873269  | 1.069581   |             |                |

|           |            |            |            |            |            |                |
|-----------|------------|------------|------------|------------|------------|----------------|
| DM07379P1 | 0.97821903 | 1.0558795  | 1.1140566  | 1.0925528  |            |                |
| DM01471P3 | 0.9785286  | -1.0369887 | -1.06552   | -1.0494527 | MGC83169   | NM_001091083.1 |
| DM03608P3 | 0.97857714 | -1.0632565 | 1.0087382  | -1.0422269 | DPSE\GA113 | XM_001357545.2 |
| DM08170P3 | 0.9788024  | -1.019929  | -1.0316578 | -1.0766788 |            |                |
| DM04472P1 | 0.97882354 | -1.0368491 | -1.0153474 | -1.0437489 |            |                |
| DM13182P1 | 0.97887754 | -1.0294839 | -1.015819  | 1.003642   |            |                |
| DM14781P2 | 0.97895706 | -1.0241342 | 1.1230292  | -1.0067712 |            |                |
| DM08132P1 | 0.97897863 | -1.0131737 | 1.0548271  | 1.0863148  |            |                |
| DM11858P1 | 0.9790812  | -1.0780132 | -1.0758324 | 1.0199538  |            |                |
| DM11723P4 | 0.9790987  | -1.1073769 | -1.0693231 | -1.0513861 |            |                |
| DM14626P1 | 0.9793203  | -1.0068773 | -1.02477   | 1.0271431  |            |                |
| DM08110P3 | 0.97936076 | -1.02971   | -1.0643706 | -1.033248  |            |                |
| DM07071P3 | 0.97941923 | -1.0025791 | 1.0556074  | 1.0380366  |            |                |
| DM12689P2 | 0.9803871  | 1.036772   | 1.0659685  | 1.1184772  |            |                |
| DM00079P3 | 0.9804729  | -1.0046387 | 1.0162065  | 1.0287452  | AGO1       | XM_624441.2    |
| DM12949P2 | 0.980583   | 1.0140353  | -1.0228828 | 1.0758495  |            |                |
| DM08202P2 | 0.9806436  | -1.0415466 | -1.0962087 | -1.1333927 |            |                |
| DM04464P1 | 0.98095256 | -1.0058125 | 1.1230985  | -1.0108334 |            |                |
| DM02730P3 | 0.9812042  | -1.050044  | -1.0634032 | -1.0706148 |            |                |
| DM14712P1 | 0.9812547  | 1.1247138  | 1.0352603  | 1.1095042  |            |                |
| DM06103P2 | 0.98126817 | 1.028132   | -1.0468948 | 1.0489709  |            |                |
| DM07942P2 | 0.9812959  | -1.138583  | -1.0468206 | -1.0710629 |            |                |
| DM06532P1 | 0.9814949  | -1.0392787 | -1.033434  | -1.0444118 |            |                |
| DM09105P1 | 0.98152786 | 1.001063   | 1.0862182  | 1.0167834  |            |                |
| DM00589P4 | 0.9815555  | 1.017869   | -1.03404   | 1.0244677  | LOC1001188 | XM_001602652.1 |
| DM08026P2 | 0.98164165 | -1.0138351 | 1.0348908  | 1.014849   |            |                |
| DM12990P3 | 0.98181736 | -1.0286227 | -1.0306221 | 1.1036899  |            |                |
| DM03835P3 | 0.9818219  | -1.1068779 | -1.0650691 | -1.048323  |            |                |
| DM00426P2 | 0.98205435 | -1.0108186 | 1.0076265  | 1.0368862  | KDM1A      | XM_861517.1    |
| DM13033P2 | 0.9821846  | 1.007325   | -1.0051976 | -1.0371561 |            |                |
| DM06663P2 | 0.98224556 | -1.0213364 | -1.0054556 | -1.0059543 |            |                |
| DM01164P3 | 0.98243487 | -1.017454  | -1.0443615 | -1.0486802 | PAH        | NM_001032678.1 |
| DM09467P2 | 0.9824443  | 1.0672239  | 1.0645086  | 1.1430428  |            |                |
| DM00972P1 | 0.98298734 | -1.0305984 | -1.0259055 | -1.0046096 | PTPN7      | NM_001040576.1 |
| DM03827P3 | 0.9830725  | 1.1181964  | 1.0787708  | 1.0739739  | LOC1000545 | XM_001490419.1 |
| DM11780P2 | 0.9832435  | 1.0148443  | 1.0370083  | 1.003885   |            |                |
| DM07522P3 | 0.98324865 | -1.0073377 | 1.0065365  | 1.0300955  |            |                |
| DM06594P3 | 0.98330855 | -1.1542753 | 1.0010184  | 1.0830249  | RN18S1     | NR_003286.2    |
| DM08896P4 | 0.98339057 | 1.0622475  | 1.1841078  | 1.0846812  |            |                |
| DM00904P3 | 0.98350734 | 1.011332   | 1.0588732  | 1.0421847  |            |                |
| DM03281P3 | 0.98358876 | -1.0202781 | 1.0184375  | -1.0233443 |            |                |
| DM10475P1 | 0.98401284 | -1.0539107 | 1.0029639  | 1.0187339  | DSEC\GM235 | XM_002032388.1 |
| DM15449P3 | 0.98406655 | 1.0112389  | 1.0732654  | 1.0254924  |            |                |
| DM13966P1 | 0.98445284 | -1.0187176 | -1.0582038 | -1.0366389 |            |                |
| DM08606P1 | 0.9845143  | -1.0859456 | -1.1186658 | -1.0601335 | DHX8       | NM_144831.2    |
| DM10909P1 | 0.9845446  | -1.0392168 | -1.0081083 | -1.0397528 |            |                |
| DM03771P1 | 0.98468125 | 1.0509863  | 1.0245305  | 1.0414919  |            |                |
| DM06779P3 | 0.9849981  | -1.0000341 | 1.0357927  | 1.0466375  |            |                |
| DM14892P3 | 0.9850419  | 1.1350765  | 1.0130467  | 1.2109332  |            |                |
| DM10687P3 | 0.9855909  | 1.0160674  | 1.0884308  | 1.038252   |            |                |

|           |            |            |            |            |            |                |
|-----------|------------|------------|------------|------------|------------|----------------|
| DM02996P2 | 0.98573345 | 1.172226   | 1.21564    | 1.0908159  | COL2A1B    | NM_001087791.1 |
| DM04591P1 | 0.98592705 | -1.0365382 | 1.0269732  | -1.0636064 |            |                |
| DM09130P1 | 0.98594666 | -1.2020348 | -1.032752  | -1.0460454 |            |                |
| DM10210P1 | 0.98621505 | 1.0533444  | 1.1142678  | 1.0401478  |            |                |
| DM06972P1 | 0.986332   | 1.0228696  | -1.0262699 | -1.0511606 |            |                |
| DM04506P1 | 0.986347   | -1.017677  | -1.1896496 | -1.0731245 |            |                |
| DM11976P1 | 0.9863789  | -1.0416409 | -1.0572779 | -1.0573044 |            |                |
| DM11648P2 | 0.9865078  | 1.0086331  | -1.0431747 | 1.0375991  |            |                |
| DM11031P1 | 0.98675114 | -1.0037453 | -1.016     | -1.0360571 |            |                |
| DM10310P1 | 0.98682785 | 1.0777869  | -1.0189936 | 1.0379325  |            |                |
| DM04169P3 | 0.9870321  | -1.1242467 | -1.066675  | -1.0877523 |            |                |
| DM04330P3 | 0.98706573 | 1.0640546  | -1.0395389 | -1.0880249 |            |                |
| DM12863P3 | 0.98722106 | 1.0006012  | -1.0406638 | 1.067202   |            |                |
| DM14468P3 | 0.98742974 | 1.0922527  | -1.0111737 | 1.0636605  |            |                |
| DM13565P1 | 0.9875063  | -1.0114309 | -1.0664017 | -1.0293692 | NCU03493   | XM_950787.2    |
| DM03182P2 | 0.98764557 | -1.022138  | 1.0105618  | -1.0156919 |            |                |
| DM12007P1 | 0.98764837 | -1.0527999 | -1.0160607 | -1.0425361 |            |                |
| DM08417P2 | 0.9877151  | -1.0382379 | 1.0635686  | 1.0345721  |            |                |
| DM07119P3 | 0.98774743 | -1.0827839 | -1.0778928 | -1.0997188 |            |                |
| DM11115P2 | 0.9877853  | 1.0055723  | -1.01178   | -1.0197932 |            |                |
| DM09745P3 | 0.9878663  | -1.0362675 | -1.0162431 | -1.0241348 |            |                |
| DM07034P2 | 0.9881049  | -1.0614562 | -1.0722044 | -1.0622145 |            |                |
| DM09871P1 | 0.9882462  | -1.0484734 | -1.0458    | 1.0191343  |            |                |
| DM13267P1 | 0.98830277 | 1.0473422  | 1.01659    | 1.0148257  |            |                |
| DM07348P3 | 0.98837537 | 1.0707717  | 1.0463938  | -1.01078   |            |                |
| DM02874P1 | 0.98838806 | -1.0412332 | -1.0308084 | -1.0525421 |            |                |
| DM07187P1 | 0.98843545 | -1.0647099 | -1.044518  | -1.017344  |            |                |
| DM02054P1 | 0.98851186 | 1.0699743  | 1.1575254  | 1.028144   |            |                |
| DM07022P3 | 0.9886644  | 1.0177715  | -1.0377688 | -1.0096779 |            |                |
| DM13435P1 | 0.9886791  | -1.0050142 | -1.0200905 | 1.0223042  |            |                |
| DM12553P1 | 0.98887783 | -1.0238645 | -1.018019  | -1.0173377 |            |                |
| DM04783P3 | 0.9888828  | 1.0018786  | 1.0429008  | -1.0078346 |            |                |
| DM03602P1 | 0.9889536  | -1.0109786 | 1.0096458  | -1.0078088 | GALK1      | NM_001092451.1 |
| DM10558P1 | 0.98905146 | 1.0110868  | 1.0271223  | -1.0359831 |            |                |
| DM05937P3 | 0.98908937 | 1.0051384  | 1.0024784  | -1.0281866 | ESRR       | XM_001862564.1 |
| DM10098P1 | 0.9891047  | 1.0278554  | 1.0385995  | 1.0806029  |            |                |
| DM01274P2 | 0.9893037  | 1.0098867  | 1.0294043  | 1.0143942  | SFXN1      | NM_001096880.1 |
| DM02195P2 | 0.98942125 | -1.025617  | -1.0013882 | -1.0176584 | RPS21      | XM_417405.2    |
| DM01768P2 | 0.9894356  | -1.0223262 | -1.0382849 | -1.0830925 | EZH        | XM_001663344.1 |
| DM09570P3 | 0.9899873  | -1.0532141 | -1.070281  | 1.0042145  |            |                |
| DM02568P2 | 0.9900239  | 1.0213326  | -1.0079198 | 1.0411785  | ZFAND2B    | NM_001095372.1 |
| DM04002P3 | 0.9900837  | -1.0079936 | 1.0085546  | 1.0335009  |            |                |
| DM14694P1 | 0.9901871  | 1.0574543  | 1.0484515  | 1.0082597  |            |                |
| DM07249P1 | 0.9903058  | 1.0174323  | -1.0126209 | -1.0274117 |            |                |
| DM02137P1 | 0.9903228  | -1.026932  | -1.0560678 | 1.0101225  |            |                |
| DM14335P2 | 0.9903982  | -1.0529224 | -1.0438571 | -1.0506915 |            |                |
| DM00008P2 | 0.99045795 | 1.0144676  | 1.0363073  | 1.0866611  | DGRI\GH226 | XM_001993992.1 |
| DM02596P1 | 0.99067444 | -1.0110693 | -1.0377873 | 1.0113758  | DYAK\GE244 | XM_002097417.1 |
| DM09872P1 | 0.99107367 | 1.079543   | 1.0400542  | 1.0113382  |            |                |
| DM02577P2 | 0.99115264 | 1.0420457  | -1.0243764 | -1.084056  |            |                |

|           |            |            |            |            |             |                |
|-----------|------------|------------|------------|------------|-------------|----------------|
| DM15182P3 | 0.9912203  | -1.048982  | -1.0259359 | 1.0129943  |             |                |
| DM13295P3 | 0.9913636  | 1.0001162  | 1.051608   | 1.0081396  |             |                |
| DM08723P1 | 0.99139315 | -1.0328012 | -1.0501729 | -1.039022  |             |                |
| DM13526P4 | 0.99140173 | -1.0537224 | 1.0319426  | -1.0404369 |             |                |
| DM05420P2 | 0.9914427  | -1.0631688 | 1.0020349  | -1.026725  |             |                |
| DM09077P3 | 0.9917087  | 1.0108377  | -1.0316604 | 1.0119039  |             |                |
| DM01143P1 | 0.9918009  | -1.1163819 | -1.1162547 | -1.004534  | LOC594703   | XM_001191012.1 |
| DM14776P3 | 0.99196357 | -1.0531676 | -1.0691552 | -1.1068035 |             |                |
| DM12651P3 | 0.99213475 | 1.0243303  | 1.0488129  | 1.0136477  |             |                |
| DM07781P3 | 0.99214906 | 1.0030432  | -1.0124439 | 1.0152409  |             |                |
| DM03296P1 | 0.9921774  | 1.0222423  | -1.0245949 | -1.0322667 |             |                |
| DM08355P3 | 0.99232346 | -1.039636  | -1.0611175 | -1.0481911 |             |                |
| DM13280P2 | 0.9926976  | 1.0544723  | 1.0028461  | 1.032924   | DPER\GL136  | XM_002020195.1 |
| DM01232P3 | 0.99284506 | -1.0754583 | 1.0110601  | -1.0120775 |             |                |
| DM06153P1 | 0.9928464  | 1.0098311  | -1.0224673 | -1.0461587 |             |                |
| DM14975P3 | 0.99298096 | 1.0340341  | 1.0656649  | 1.0056187  |             |                |
| DM13386P1 | 0.99304205 | -1.0707524 | -1.0308925 | -1.0391434 |             |                |
| DM02896P1 | 0.99305004 | -1.0308735 | -1.0172429 | -1.0749756 | SEC14L2     | NM_144520.2    |
| DM02656P1 | 0.99314743 | 1.0245652  | 1.0711877  | 1.0269862  |             |                |
| DM00528P3 | 0.99319965 | 1.0202713  | -1.031929  | -1.0452006 | DVIR\GJ2443 | XM_002054372.1 |
| DM04299P1 | 0.99320155 | 1.0582707  | 1.0133445  | -1.0134233 |             |                |
| DM09029P1 | 0.9933884  | -1.0201929 | -1.0061039 | -1.0428019 |             |                |
| DM06118P3 | 0.9934409  | -1.0057212 | -1.0397633 | 1.028471   | AGAP_AGAP0  | XM_309374.4    |
| DM10408P2 | 0.9935103  | -1.0127847 | -1.0019615 | 1.077883   |             |                |
| DM00717P2 | 0.99362385 | 1.0882279  | 1.0517324  | 1.0219892  |             |                |
| DM04619P1 | 0.9939111  | 1.0090014  | -1.013165  | -1.0186439 |             |                |
| DM02856P1 | 0.9939518  | 1.0540478  | -1.0142154 | -1.0163591 | DWIL\GK172  | XM_002061849.1 |
| DM03243P1 | 0.9940067  | 1.0052094  | 1.0007044  | 1.1612948  | LOC755235   | XM_001189018.1 |
| DM09758P1 | 0.99406904 | 1.0251747  | 1.0241904  | 1.0099057  |             |                |
| DM04492P3 | 0.99409634 | 1.0317857  | 1.0637772  | 1.0075796  |             |                |
| DM00688P1 | 0.9941003  | 1.0109385  | -1.0048656 | -1.0455582 | LOC1001863  | XM_002131086.1 |
| DM14759P1 | 0.9941294  | 1.0154736  | -1.0428785 | 1.004603   |             |                |
| DM04459P4 | 0.9942074  | 1.0836561  | 1.0677247  | 1.0405177  |             |                |
| DM10236P1 | 0.9945499  | -1.0183675 | -1.0008534 | -1.0510864 |             |                |
| DM10599P1 | 0.99491596 | -1.1189021 | -1.0277463 | 1.010239   | COL1        | NM_001122918.1 |
| DM08213P2 | 0.99509996 | -1.0742904 | -1.0499103 | -1.0341145 |             |                |
| DM09200P1 | 0.99515575 | 1.0256486  | 1.0020562  | 1.0469842  |             |                |
| DM02602P2 | 0.9951566  | -1.0163746 | -1.0321484 | 1.010676   | DYAK\GE125  | XM_002088394.1 |
| DM03069P1 | 0.99517256 | -1.0537665 | -1.0660374 | -1.0453553 |             |                |
| DM01483P2 | 0.9952186  | 1.0514201  | 1.0016606  | -1.0026543 |             |                |
| DM06950P1 | 0.9952255  | 1.0257368  | 1.0372461  | -1.0053009 |             |                |
| DM02043P2 | 0.99526304 | 1.0113356  | -1.0025388 | 1.0136039  | RPS26       | NM_001126227.2 |
| DM12997P3 | 0.99528587 | -1.006056  | -1.029286  | -1.0194224 |             |                |
| DM13095P1 | 0.99534047 | -1.0021694 | 1.0132419  | 1.0557704  |             |                |
| DM02849P3 | 0.995397   | 1.0069833  | 1.0278826  | 1.0106488  | MDH1        | NM_001009329.1 |
| DM14738P3 | 0.9955388  | -1.1315588 | -1.0347729 | -1.0559449 |             |                |
| DM13242P1 | 0.9957227  | -1.0401427 | -1.0339704 | 1.0048379  |             |                |
| DM00658P2 | 0.99574685 | 1.011128   | 1.001494   | -1.0126956 | DERE\GG252  | XM_001969003.1 |
| DM04540P2 | 0.9957793  | -1.0589143 | -1.0632275 | -1.0905116 | EHI_025850  | XM_001914017.1 |
| DM14081P1 | 0.9958259  | 1.0880002  | -1.0097582 | 1.0388657  | AAEL_AAEL0C | XM_001648251.1 |

|           |            |            |            |            |              |                |
|-----------|------------|------------|------------|------------|--------------|----------------|
| DM08521P1 | 0.99589735 | -1.00945   | 1.0423577  | -1.0041081 | MRPS22       | NM_001046319.1 |
| DM01092P1 | 0.99594676 | -1.0555083 | -1.0328735 | -1.0440156 |              |                |
| DM05776P1 | 0.9960138  | -1.010116  | -1.0145591 | -1.0527147 |              |                |
| DM01923P3 | 0.9960276  | -1.0057427 | 1.0248106  | 1.0044675  | DGRI\GH248\  | XM_001992647.1 |
| DM01852P3 | 0.9960472  | -1.0526085 | -1.029418  | -1.0353793 | DWIL\GK143\  | XM_002073777.1 |
| DM07694P2 | 0.9961644  | 1.0369074  | -1.0124159 | -1.0042781 |              |                |
| DM09364P2 | 0.99618167 | -1.0168661 | 1.0117313  | 1.0001185  |              |                |
| DM14214P2 | 0.9964202  | -1.0232457 | 1.0071361  | 1.0043292  | NCU11050     | XM_001728493.1 |
| DM04693P1 | 0.9964619  | 1.0280435  | -1.0004209 | 1.0287796  |              |                |
| DM15197P3 | 0.9966258  | 1.0064596  | -1.0227227 | -1.0155033 |              |                |
| DM14530P3 | 0.99694955 | 1.0073844  | 1.0121585  | 1.028762   |              |                |
| DM11216P1 | 0.9970139  | -1.0092628 | 1.0139389  | 1.0645573  |              |                |
| DM01715P2 | 0.9971476  | -1.0171462 | -1.0039582 | 1.003464   | ACO-2        | NM_171885.1    |
| DM06698P1 | 0.9972044  | 1.0137995  | -1.0057088 | -1.0063967 |              |                |
| DM04001P1 | 0.99752754 | 1.0581739  | 1.0788103  | 1.0621487  |              |                |
| DM03736P2 | 0.99753946 | 1.0051602  | 1.0005076  | 1.0440787  |              |                |
| DM01474P2 | 0.9975655  | -1.0249412 | 1.0274725  | 1.0026624  | DVIR\GJ1446\ | XM_002058467.1 |
| DM12567P1 | 0.9976003  | 1.0692943  | 1.0379039  | 1.0226649  |              |                |
| DM15160P3 | 0.99776375 | -1.0223213 | 1.0083396  | 1.0129685  |              |                |
| DM14615P3 | 0.9977908  | -1.066534  | -1.1277741 | -1.0439335 |              |                |
| DM12946P1 | 0.9980688  | -1.0330259 | -1.0054344 | -1.0170333 | PHACTR1      | XM_001492143.2 |
| DM14473P4 | 0.9981301  | 1.0005261  | 1.0374966  | 1.0116634  |              |                |
| DM10433P3 | 0.9983731  | -1.0290964 | 1.0479418  | 1.0299624  |              |                |
| DM08453P3 | 0.99843705 | -1.0126804 | -1.0158688 | -1.0119803 |              |                |
| DM02958P1 | 0.9984561  | -1.0040995 | -1.009389  | -1.0152526 |              |                |
| DM09322P1 | 0.9986571  | 1.0401845  | 1.0511713  | 1.0345236  |              |                |
| DM10246P4 | 0.9988239  | -1.0039415 | 1.0030338  | -1.006041  |              |                |
| DM05893P2 | 0.9988823  | -1.0025365 | -1.019363  | 1.0153837  |              |                |
| DM07466P2 | 0.99892735 | -1.0197179 | -1.0002075 | -1.013073  |              |                |
| DM05169P3 | 0.99899334 | 1.055745   | 1.0088497  | 1.0786138  |              |                |
| DM07582P3 | 0.999232   | 1.0491033  | 1.0264354  | 1.0211669  |              |                |
| DM14094P1 | 0.99928695 | -1.0010037 | -1.0051628 | -1.0083891 |              |                |
| DM00683P3 | 0.99931645 | -1.002679  | 1.0004009  | 1.0294108  | LOC1002270\  | XM_002191176.1 |
| DM06602P2 | 0.99940217 | -1.001361  | -1.0228504 | 1.0183069  |              |                |
| DM13445P1 | 0.9994146  | -1.0101925 | -1.0148025 | 1.0121374  |              |                |
| DM06949P4 | 0.9994193  | -1.0138983 | -1.0036913 | 1.00604    |              |                |
| DM04193P2 | 0.9994635  | 1.0168991  | 1.0150772  | 1.0066862  |              |                |
| DM07361P1 | 0.99949545 | -1.014315  | -1.0370667 | -1.0114453 |              |                |
| DM08813P1 | 0.9995075  | 1.0129604  | 1.0189803  | 1.0289253  |              |                |
| DM09383P1 | 0.9995802  | 1.0205959  | 1.0050014  | 1.0112879  |              |                |
| DM12954P1 | 0.99974424 | 1.005574   | 1.0081073  | 1.0276226  |              |                |
