# Supplementary material
Source: PubMed Central journal article supplement (PMC4120942)
Supplement: NIHMS592482-supplement-Supplementary_Data_Table_3.pdf [file NIHMS592482-supplement-Supplementary_Data_Table_3.pdf]

**Table S3: Differentially expressed genes for TNT 0.004 mg/L**

| ProbeName | p          | FC ([0.004] | GeneSymbol   | RefSeqAccession |
|-----------|------------|-------------|--------------|-----------------|
| DM00025P2 | 0.00730096 | -1.3440197  | LOC10020139  | XM_002162742.1  |
| DM00206P2 | 8.98E-04   | -1.1900035  | GAINT7       | XM_001865749.1  |
| DM00219P2 | 0.00536974 | 1.299892    | AgaP_AGAP00  | XM_318292.2     |
| DM00228P1 | 0.01392757 | 1.2905736   | Dpse\GA171E  | XM_001382185.1  |
| DM00281P1 | 0.00543857 | 1.1479857   | MUT          | XM_532164.2     |
| DM00309P3 | 0.03082623 | 1.3321539   | ACS2         | XM_001700178.1  |
| DM00347P2 | 5.15E-04   | -1.8041885  | ABC          | XM_001649689.1  |
| DM00373P3 | 0.00127843 | -1.1811758  | MANF         | XM_625020.2     |
| DM00522P1 | 0.04325676 | 1.4116849   |              |                 |
| DM00569P1 | 0.00188428 | 2.0230756   | AgaP_AGAP00  | XM_001689121.1  |
| DM00587P3 | 0.00318385 | 1.6840292   | LOC412744    | XM_396197.3     |
| DM00678P1 | 0.01333536 | 1.4971466   | ATG1         | NM_001169962.1  |
| DM00696P4 | 0.00158923 | 2.3471417   | BMM          | NM_001169974.1  |
| DM00802P3 | 0.00536224 | 1.3722329   | LOC552832    | XM_625207.1     |
| DM00848P1 | 0.0011931  | -4.431916   |              |                 |
| DM01057P2 | 0.02858192 | -1.2539005  | NEMVEDRAFT   | XM_001634500.1  |
| DM01094P1 | 0.00492553 | 1.3196943   | TRIADDRAFT_  | XM_002117079.1  |
| DM01138P4 | 4.71E-06   | -4.1095653  |              |                 |
| DM01178P1 | 0.02767916 | 1.4291785   |              |                 |
| DM01200P3 | 0.02236315 | -1.2965814  |              |                 |
| DM01207P1 | 0.00823635 | -1.2242204  | WDR61        | XM_536215.2     |
| DM01233P4 | 0.00291568 | 1.569858    | CpipJ_CPIJ00 | XM_001849333.1  |
| DM01246P4 | 0.04040237 | 1.224595    |              |                 |
| DM01271P1 | 0.00202953 | 6.113601    | IscW_ISCW0   | XM_002413666.1  |
| DM01373P2 | 0.00688194 | 1.6324222   | Dpse\GA1901  | XM_001358143.2  |
| DM01502P2 | 0.00359019 | 1.2760758   | LOC1002062   | XM_002156722.1  |
| DM01742P2 | 1.28E-05   | -8.760819   |              |                 |
| DM01744P1 | 0.0034163  | 1.3497137   | LOC552832    | XM_625207.1     |
| DM01747P3 | 0.02136506 | -1.714678   | Dsim\GD1305  | XM_002083949.1  |
| DM01761P3 | 0.00442407 | -1.6782938  |              |                 |
| DM01800P2 | 0.00153174 | -1.2588328  | Dere\GG2502  | XM_001980943.1  |
| DM01809P3 | 0.02200096 | 1.6020232   |              |                 |
| DM01964P1 | 0.00434063 | -1.1827178  | Dere\GG2278  | XM_001979637.1  |
| DM01982P1 | 0.01154367 | 1.3575313   | NEMVEDRAFT   | XM_001634353.1  |
| DM02146P1 | 0.00395884 | 1.1749703   | Dsec\GM1854  | XM_002037896.1  |
| DM02208P3 | 5.52E-04   | -1.2408631  | Dvir\GJ15754 | XM_002057934.1  |
| DM02218P1 | 9.00E-05   | -2.4509752  |              |                 |
| DM02229P1 | 0.00166264 | -1.2775738  | Dyak\GE141C  | XM_002092255.1  |
| DM02238P2 | 8.29E-04   | 2.454926    |              |                 |
| DM02245P1 | 0.00174227 | -1.4311273  | SAMD         | XM_001658136.1  |
| DM02283P1 | 5.50E-06   | -2.1779606  | IscW_ISCW0   | XM_002416102.1  |
| DM02397P1 | 0.01063721 | -1.587281   | LOC10018750  | XM_002125820.1  |
| DM02446P1 | 0.01282905 | -1.2584696  | NEMVEDRAFT   | XM_001639323.1  |
| DM02487P3 | 0.00894828 | 1.5196201   | LOC1002270   | XM_002191176.1  |
| DM02550P3 | 9.71E-04   | 1.4577596   |              |                 |
| DM02595P4 | 0.01237961 | -1.2164553  | Dmoj\GI2422  | XM_001998866.1  |

|           |            |            |             |                |
|-----------|------------|------------|-------------|----------------|
| DM02624P2 | 0.0203919  | 1.2624158  | LOC10015976 | XM_001952088.1 |
| DM02667P2 | 0.038312   | 1.2465101  |             |                |
| DM02677P3 | 1.58E-05   | 2.0984287  |             |                |
| DM02711P4 | 0.02888573 | -1.2814338 | NEDD8       | NM_174764.3    |
| DM02822P1 | 0.00499716 | -1.2206883 |             |                |
| DM02831P3 | 1.94E-04   | 2.933074   | LOC789799   | XM_001256447.2 |
| DM02855P3 | 0.01807368 | 1.6643854  |             |                |
| DM02860P2 | 0.02493231 | -1.3042587 | SPASE22-23  | XM_001122788.1 |
| DM02866P4 | 0.00451279 | 1.2764882  | NEMVEDRAFT  | XM_001624461.1 |
| DM02917P4 | 9.24E-04   | -1.2299536 | IscW_ISCW0  | XM_002411321.1 |
| DM02984P3 | 4.10E-07   | -3.3932483 |             |                |
| DM03007P2 | 0.01662214 | -1.3681129 | LOC663663   | XM_969699.1    |
| DM03011P2 | 5.41E-05   | 1.2927392  | YALIOF05962 | XM_505057.1    |
| DM03055P2 | 6.82E-04   | 1.2234665  |             |                |
| DM03080P2 | 0.01227681 | -1.2479458 | BRAFLDRAFT  | XM_002601566.1 |
| DM03145P3 | 0.00263576 | -4.2508583 | LOC10027446 | NM_001148825.1 |
| DM03298P3 | 0.00622176 | 1.5368123  |             |                |
| DM03364P2 | 0.01622845 | 1.2542976  |             |                |
| DM03373P4 | 0.00189371 | 2.6330974  |             |                |
| DM03501P4 | 0.00616848 | -1.9054233 |             |                |
| DM03509P1 | 0.00488432 | -1.560998  |             |                |
| DM03526P2 | 0.01952574 | -1.5417601 | LOC726674   | XM_001122396.1 |
| DM03579P1 | 0.03820245 | 1.4114938  |             |                |
| DM03621P3 | 0.03112629 | -1.1642088 | Dmoj\GI2422 | XM_001998866.1 |
| DM03659P1 | 0.02666596 | -1.4565436 | LOC552533   | XM_624909.2    |
| DM03663P3 | 0.00395124 | 1.647546   | Dana\GF1873 | XM_001955346.1 |
| DM03725P2 | 0.00261016 | 1.2373703  |             |                |
| DM03787P3 | 0.01904315 | 1.3785889  | AaeL_AAEL01 | XM_001663998.1 |
| DM03807P3 | 1.17E-05   | 3.7646604  | CG10663     | NM_001104123.1 |
| DM03878P1 | 7.81E-05   | -2.822724  | IscW_ISCW0  | XM_002416102.1 |
| DM03968P1 | 0.00856203 | 1.633815   |             |                |
| DM04058P1 | 0.00154057 | 4.990904   |             |                |
| DM04198P3 | 0.00350708 | 1.5583758  |             |                |
| DM04290P2 | 0.00994111 | -2.2119226 |             |                |
| DM04295P1 | 0.0010403  | 6.5677004  |             |                |
| DM04383P3 | 2.00E-06   | 1.4915718  |             |                |
| DM04478P3 | 0.00633536 | 3.000081   |             |                |
| DM04498P3 | 0.04994387 | 1.7413361  | ADH5        | NM_001031152.1 |
| DM04583P2 | 1.32E-05   | -1.6430008 |             |                |
| DM04653P1 | 0.00266403 | 1.9035199  |             |                |
| DM04655P3 | 0.00611187 | 1.7626364  | LOC657581   | XM_001811711.1 |
| DM04682P4 | 0.01786538 | 1.1986091  |             |                |
| DM04834P2 | 0.04225613 | 1.3519521  |             |                |
| DM04837P3 | 0.00165599 | 1.2195281  | LOC10011386 | XM_001602665.1 |
| DM04845P1 | 1.73E-04   | -1.1159313 | LOC10011916 | XM_001602923.1 |
| DM04856P1 | 0.01475259 | 1.2455202  | LOC10002167 | XM_001368459.1 |
| DM04860P3 | 1.74E-04   | -1.7529043 |             |                |
| DM04894P2 | 4.44E-05   | -2.98709   |             |                |
| DM04941P2 | 9.34E-07   | 3.4217396  |             |                |

|           |            |            |            |                |
|-----------|------------|------------|------------|----------------|
| DM04955P2 | 0.00110321 | 4.1121836  |            |                |
| DM05007P1 | 0.00418794 | 1.3289918  | CLN3       | XM_523328.2    |
| DM05037P1 | 0.00627824 | 1.2487286  |            |                |
| DM05112P2 | 0.00416812 | -1.4720935 |            |                |
| DM05131P4 | 0.00239719 | 1.2791964  |            |                |
| DM05138P3 | 0.03486307 | 1.1623582  |            |                |
| DM05153P1 | 0.02356148 | -1.457211  | LOC1001773 | XM_002127797.1 |
| DM05176P3 | 0.02842522 | 1.498894   |            |                |
| DM05207P1 | 7.89E-04   | -1.9983519 |            |                |
| DM05216P1 | 0.00595589 | 5.509706   |            |                |
| DM05257P1 | 0.00437899 | -1.2064191 | NEMVEDRAFT | XM_001633252.1 |
| DM05281P1 | 0.00123974 | -1.1865332 |            |                |
| DM05384P3 | 0.01569828 | 2.409607   |            |                |
| DM05394P1 | 0.01758277 | -1.334113  |            |                |
| DM05417P2 | 0.03775309 | 1.3843291  |            |                |
| DM05447P1 | 0.02171395 | 1.1736412  |            |                |
| DM05490P2 | 0.01364777 | 1.4103577  |            |                |
| DM05522P4 | 0.01142484 | -1.5089043 |            |                |
| DM05560P3 | 0.0017954  | 1.7085011  |            |                |
| DM05567P1 | 0.00250013 | 1.871058   |            |                |
| DM05623P1 | 0.00323178 | 1.2320421  |            |                |
| DM05697P4 | 0.0174381  | -1.6541431 |            |                |
| DM05718P3 | 9.22E-04   | -2.4610257 |            |                |
| DM05782P3 | 0.03716631 | 1.5027289  |            |                |
| DM05809P1 | 0.00327057 | -1.5623306 |            |                |
| DM05833P1 | 0.00728786 | -1.5498868 | LOC663663  | XM_969699.1    |
| DM05838P1 | 7.88E-04   | -2.494401  |            |                |
| DM05840P4 | 0.00193581 | 2.4750903  |            |                |
| DM05878P1 | 2.56E-06   | -21.22727  |            |                |
| DM05883P1 | 1.46E-07   | -4.164618  |            |                |
| DM05914P3 | 3.41E-05   | -2.525613  |            |                |
| DM05943P3 | 0.01584249 | 1.4025936  | LOC1002077 | XM_002162013.1 |
| DM06005P2 | 8.31E-05   | 1.2908304  |            |                |
| DM06007P1 | 0.00632377 | 2.4618142  |            |                |
| DM06044P1 | 0.00281144 | -1.5853485 |            |                |
| DM06098P1 | 0.03278784 | -1.5286118 |            |                |
| DM06127P1 | 8.42E-04   | 1.5384744  | AgaP_AGAP0 | XM_308594.4    |
| DM06131P3 | 3.05E-04   | 1.2517984  | RHO        | XM_001651947.1 |
| DM06223P1 | 0.04899548 | -1.3794509 | TUBB3      | XM_001023006.2 |
| DM06224P2 | 0.01112169 | -1.3060538 | LOC552328  | XM_624704.2    |
| DM06313P2 | 0.02422539 | -1.6504456 |            |                |
| DM06319P2 | 1.97E-04   | 2.3898652  | SNOG_05978 | XM_001796314.1 |
| DM06323P1 | 1.33E-05   | -1.3403641 |            |                |
| DM06338P2 | 0.01513279 | 2.161681   | LOC410828  | XM_394304.3    |
| DM06370P1 | 0.00520155 | 1.9895153  | Dsec\GM249 | XM_002029583.1 |
| DM06383P2 | 0.00554638 | 2.7937164  |            |                |
| DM06422P2 | 0.00413734 | 1.3338704  |            |                |
| DM06672P1 | 2.72E-06   | -1.605482  |            |                |
| DM06771P1 | 0.00638513 | -2.3005958 |            |                |

|           |            |            |                            |
|-----------|------------|------------|----------------------------|
| DM06826P2 | 0.0065276  | -1.8570952 |                            |
| DM06871P1 | 0.00891969 | -1.3574079 |                            |
| DM06905P2 | 0.00504654 | 1.2328329  |                            |
| DM06944P1 | 8.27E-04   | 1.4066575  |                            |
| DM06967P3 | 0.018845   | -1.7229688 |                            |
| DM07050P2 | 0.00137485 | -3.0966828 |                            |
| DM07072P2 | 0.03539234 | 1.4420475  | CIMG_08288 XM_001241124.1  |
| DM07084P1 | 0.01966634 | -1.6167897 |                            |
| DM07111P3 | 0.00498795 | 1.6337149  |                            |
| DM07140P3 | 6.62E-04   | 1.3911968  |                            |
| DM07144P1 | 5.88E-05   | -2.123621  |                            |
| DM07237P1 | 0.01012799 | 1.4831028  | Dwi\GK1051\XM_002074398.1  |
| DM07273P2 | 7.77E-05   | 1.3526461  |                            |
| DM07311P1 | 0.01738243 | -4.344554  |                            |
| DM07400P1 | 0.00127812 | -2.2988827 |                            |
| DM07449P2 | 0.0231157  | 1.3262663  |                            |
| DM07468P1 | 9.60E-08   | 1.5381198  |                            |
| DM07499P1 | 0.04264496 | -1.4360435 |                            |
| DM07548P1 | 9.15E-04   | 1.2022085  |                            |
| DM07683P1 | 8.57E-04   | 4.095996   |                            |
| DM07685P2 | 8.97E-04   | 1.4900165  |                            |
| DM07701P3 | 0.0287844  | 1.1602209  |                            |
| DM07782P1 | 3.51E-04   | 1.5962372  |                            |
| DM07791P3 | 0.04309909 | -1.3464981 |                            |
| DM07811P3 | 0.00235595 | -1.3015168 |                            |
| DM07969P3 | 0.01398439 | 1.2677484  |                            |
| DM07975P1 | 0.01041276 | -1.8459024 |                            |
| DM07997P2 | 4.81E-04   | -1.4763888 |                            |
| DM08013P3 | 0.00113257 | -3.2654064 | LOC10013625\NM_001124521.1 |
| DM08053P2 | 0.00237479 | 2.4705627  |                            |
| DM08098P2 | 0.00960158 | 1.4813389  |                            |
| DM08129P1 | 0.00499599 | 2.4825974  |                            |
| DM08162P2 | 2.49E-04   | -2.1870985 |                            |
| DM08173P2 | 0.02334616 | -1.1983951 |                            |
| DM08196P4 | 0.0020807  | -1.696929  |                            |
| DM08218P2 | 3.34E-04   | -2.1422284 |                            |
| DM08304P2 | 0.00810775 | -1.5745851 |                            |
| DM08360P3 | 4.42E-05   | -10.11818  |                            |
| DM08414P4 | 0.01349157 | 2.136255   |                            |
| DM08428P1 | 0.01885384 | -2.6280868 |                            |
| DM08459P2 | 0.02142762 | 2.2743878  |                            |
| DM08463P2 | 0.02378508 | -2.5197918 | FG01049.1 XM_381225.1      |
| DM08530P1 | 0.01596277 | 1.6451032  |                            |
| DM08531P2 | 5.30E-04   | 2.2357588  |                            |
| DM08578P1 | 0.00390991 | 1.8108307  |                            |
| DM09084P1 | 0.00835801 | -1.3792725 |                            |
| DM09086P2 | 0.016748   | 1.44132    |                            |
| DM09115P3 | 0.00747617 | -1.2545724 |                            |
| DM09121P1 | 0.00309363 | 2.052018   |                            |

|           |            |            |                            |
|-----------|------------|------------|----------------------------|
| DM09248P2 | 0.01884723 | 2.3979344  |                            |
| DM09450P3 | 0.03075293 | 1.5470791  |                            |
| DM09473P2 | 0.01790095 | 1.342512   |                            |
| DM09546P3 | 0.00103436 | -1.4043685 |                            |
| DM09569P3 | 0.01257035 | 2.3816197  |                            |
| DM09640P3 | 8.08E-04   | 2.441501   |                            |
| DM09700P1 | 2.11E-04   | 1.2589954  |                            |
| DM09845P3 | 0.00227906 | 1.3497237  |                            |
| DM09850P1 | 0.00618228 | 1.3042618  |                            |
| DM09944P3 | 0.01323407 | -1.2234085 |                            |
| DM09971P1 | 0.00584137 | 1.5005202  | Dyak\GE2465 XM_002097109.1 |
| DM09975P2 | 0.0091055  | 1.4484297  |                            |
| DM10053P2 | 0.00852346 | 6.0928507  |                            |
| DM10085P1 | 8.65E-05   | -1.7516614 |                            |
| DM10180P1 | 0.00589355 | -1.4628001 |                            |
| DM10233P1 | 0.02365423 | -1.7791686 |                            |
| DM10359P4 | 6.62E-06   | -1.9974284 |                            |
| DM10455P1 | 0.00728536 | 1.4565713  |                            |
| DM10459P3 | 0.03736275 | -1.6918049 |                            |
| DM10519P1 | 4.24E-06   | -1.760619  |                            |
| DM10656P4 | 0.02170864 | 1.2587924  |                            |
| DM10773P1 | 0.00494869 | 1.5625951  |                            |
| DM10836P4 | 0.00912333 | 1.3541225  |                            |
| DM10838P2 | 0.01196103 | 1.3388063  |                            |
| DM11104P2 | 0.03799274 | 1.4703162  |                            |
| DM11159P1 | 0.01338232 | 1.5532469  |                            |
| DM11208P3 | 6.27E-11   | -2.759943  |                            |
| DM11399P1 | 0.00146043 | 1.7310412  |                            |
| DM11462P1 | 0.00180922 | -2.2458801 |                            |
| DM11499P1 | 0.00767974 | -2.0149465 |                            |
| DM11644P3 | 2.87E-04   | 1.6557542  |                            |
| DM11662P4 | 2.69E-04   | -1.2603368 |                            |
| DM11696P1 | 0.00177861 | -1.4349223 |                            |
| DM11775P4 | 1.85E-04   | 2.3715768  |                            |
| DM11834P3 | 0.00977485 | 1.3536671  |                            |
| DM11902P1 | 0.00605504 | 1.4927269  |                            |
| DM11931P1 | 0.01036019 | 3.5334983  |                            |
| DM12034P1 | 0.02127135 | 1.622403   |                            |
| DM12065P2 | 2.00E-06   | -1.8919256 |                            |
| DM12083P3 | 0.00695375 | 1.9935218  |                            |
| DM12114P2 | 0.00196255 | 1.3508332  |                            |
| DM12118P2 | 0.00330353 | 1.5744175  | Dere\GG1725 XM_001980589.1 |
| DM12133P2 | 2.45E-04   | -3.6621506 |                            |
| DM12154P2 | 0.02015181 | 1.7206241  |                            |
| DM12183P2 | 1.84E-04   | 2.0153675  |                            |
| DM12275P1 | 0.01534618 | 1.2722025  |                            |
| DM12387P2 | 0.00832972 | 1.3446592  |                            |
| DM12406P2 | 0.01939848 | 1.2870153  |                            |
| DM12524P2 | 2.72E-06   | -1.6908418 |                            |

|           |            |            |                             |
|-----------|------------|------------|-----------------------------|
| DM12531P2 | 0.00636103 | 1.5234038  |                             |
| DM12614P2 | 7.78E-05   | -9.769839  |                             |
| DM12666P2 | 0.01963572 | 1.3529195  |                             |
| DM12730P3 | 2.57E-04   | 1.2503748  |                             |
| DM12797P3 | 0.00882722 | 17.76302   | Dvir\GJ16324 XM_002060216.1 |
| DM12834P1 | 2.16E-05   | -4.809301  |                             |
| DM12917P1 | 0.00256433 | -1.550503  |                             |
| DM13062P1 | 1.10E-04   | -1.6793051 |                             |
| DM13142P3 | 0.0208657  | -2.4763274 |                             |
| DM13286P2 | 0.01414867 | -1.6422757 | Dyak\GE1042 XM_002098498.1  |
| DM13474P3 | 5.36E-06   | 2.7713358  |                             |
| DM13630P3 | 0.00365673 | 3.426231   | Dvir\GJ12666 XM_002046130.1 |
| DM13643P2 | 0.02871866 | -1.3235747 |                             |
| DM13754P1 | 0.01972906 | 1.2320712  |                             |
| DM13805P4 | 0.0308807  | 1.8362768  |                             |
| DM13829P1 | 0.03738838 | -1.2895364 |                             |
| DM13920P1 | 0.01540302 | 1.7407634  | TRIADDRAFT_ XM_002117580.1  |
| DM13942P1 | 0.04282153 | -1.252509  |                             |
| DM14028P1 | 3.58E-04   | -1.3171508 |                             |
| DM14182P2 | 2.03E-06   | -1.4658037 |                             |
| DM14263P1 | 0.00418841 | -1.5379131 |                             |
| DM14646P1 | 0.00254412 | -1.3683201 |                             |
| DM14660P1 | 2.39E-04   | 1.4502697  |                             |
| DM14739P3 | 0.01326531 | -1.1807038 |                             |
| DM14771P2 | 0.00113741 | 1.8515315  |                             |
| DM14968P3 | 7.88E-04   | 1.7148908  |                             |
| DM15271P2 | 0.03555173 | -1.2131562 |                             |
| DM15340P2 | 0.00160468 | -1.1985441 |                             |
| DM15398P1 | 0.0080795  | 1.5656289  |                             |
