# Supplementary material
Source: PubMed Central journal article supplement (PMC4120942)
Supplement: NIHMS592482-supplement-Supplementary_Data_Table_4.pdf [file NIHMS592482-supplement-Supplementary_Data_Table_4.pdf]

**Table S4: Differentially expressed genes for TNT 012 mg/L**

| ProbeName | p          | FC ([0.12] v | GeneSymbol   | RefSeqAccession |
|-----------|------------|--------------|--------------|-----------------|
| DM10196P1 | 0.00325843 | 5.0771165    |              |                 |
| DM03127P1 | 0.03132122 | 1.5969994    |              |                 |
| DM08507P1 | 0.00302906 | 1.2676477    |              |                 |
| DM11187P2 | 0.02881902 | 1.3713367    |              |                 |
| DM01259P3 | 0.03399788 | 1.307269     | LOC10017570  | XM_002128334.1  |
| DM09278P2 | 0.02107083 | 1.6568605    |              |                 |
| DM10115P3 | 0.04515092 | 1.504868     |              |                 |
| DM10923P2 | 1.48E-04   | -1.2437596   |              |                 |
| DM02550P3 | 9.71E-04   | 1.6080071    |              |                 |
| DM10232P3 | 0.02871804 | 1.4628294    |              |                 |
| DM10180P1 | 0.00589355 | -1.3861139   |              |                 |
| DM02822P1 | 0.00499716 | -1.286321    |              |                 |
| DM10519P1 | 4.24E-06   | -2.0117772   |              |                 |
| DM10974P1 | 0.0055922  | -1.4650277   |              |                 |
| DM03603P3 | 0.03206316 | 1.3548398    |              |                 |
| DM05878P1 | 2.56E-06   | -18.777668   |              |                 |
| DM06562P1 | 0.02946621 | 1.4459277    |              |                 |
| DM09050P2 | 0.02302188 | 1.169226     |              |                 |
| DM00498P1 | 0.00301794 | -1.363309    | LOC692991    | NM_001046828.1  |
| DM04655P3 | 0.00611187 | 1.9209832    | LOC657581    | XM_001811711.1  |
| DM00672P3 | 0.01616612 | -1.3642089   | Uba1         | XM_001492947.2  |
| DM09581P3 | 0.01988976 | 1.6630349    |              |                 |
| DM05862P1 | 0.00217575 | -1.4200429   |              |                 |
| DM07230P2 | 0.00308637 | 2.433098     |              |                 |
| DM00289P1 | 0.03568845 | 1.4538312    | LOC658754    | XM_965116.2     |
| DM01250P1 | 0.02809021 | -1.2141174   | anon-381MEL  | XM_002106913.1  |
| DM09237P1 | 0.01205529 | 3.1045654    |              |                 |
| DM10359P4 | 6.62E-06   | -1.7927076   |              |                 |
| DM14553P2 | 0.00101221 | -2.5524898   |              |                 |
| DM05883P1 | 1.46E-07   | -4.8205967   |              |                 |
| DM03742P4 | 0.00534898 | -2.590214    |              |                 |
| DM08876P2 | 0.03304853 | 2.0130916    |              |                 |
| DM05102P3 | 0.01597224 | 1.2670623    | CSNK1E       | NM_212747.1     |
| DM10871P1 | 0.03810772 | 1.1390196    | TVAG_090030  | XM_001314393.1  |
| DM03184P1 | 6.22E-04   | 1.8229831    |              |                 |
| DM07400P1 | 0.00127812 | -2.6739671   |              |                 |
| DM10407P1 | 1.64E-04   | -1.1548756   |              |                 |
| DM02145P2 | 0.00771173 | 1.3655511    | MSF1         | XM_001657148.1  |
| DM01986P1 | 0.0021878  | -1.2973472   | NEMVEDRAFT   | XM_001626918.1  |
| DM11979P1 | 0.00221286 | 1.152171     |              |                 |
| DM06156P1 | 0.04747419 | 1.4240838    |              |                 |
| DM03735P1 | 0.03790471 | -1.2663916   | COPB1        | XM_001504942.1  |
| DM03054P2 | 0.02803397 | -1.3559465   | Dvir\GJ24087 | XM_002053769.1  |
| DM14065P1 | 0.04072447 | -1.6562878   |              |                 |
| DM12162P1 | 0.00133107 | 1.3182148    |              |                 |
| DM02397P1 | 0.01063721 | -1.6754144   | LOC10018750  | XM_002125820.1  |

|           |            |            |              |                |
|-----------|------------|------------|--------------|----------------|
| DM01271P1 | 0.00202953 | 7.490757   | IscW_ISCW0   | XM_002413666.1 |
| DM00228P1 | 0.01392757 | 1.2962824  | Dpse\GA171E  | XM_001382185.1 |
| DM09971P1 | 0.00584137 | 1.6342542  | Dyak\GE246E  | XM_002097109.1 |
| DM08108P3 | 0.0343967  | 6.1581054  | Dwil\GK1628  | XM_002067212.1 |
| DM08414P4 | 0.01349157 | 2.50917    |              |                |
| DM03298P3 | 0.00622176 | 1.6792637  |              |                |
| DM01124P2 | 6.91E-04   | -1.3693182 |              |                |
| DM03373P4 | 0.00189371 | 2.6780937  |              |                |
| DM07548P1 | 9.15E-04   | 1.2512285  |              |                |
| DM02832P2 | 0.04664586 | 1.938541   | TNNC         | XM_001652023.1 |
| DM02136P1 | 0.01479023 | 1.2812098  | Dmoj\GI1166  | XM_002002599.1 |
| DM12099P4 | 0.01068436 | 4.235189   |              |                |
| DM09914P3 | 0.03361285 | -1.3177581 | secc22       | XM_001656246.1 |
| DM12680P2 | 0.02007256 | -2.735455  | CpipJ_CPIJ00 | XM_001846375.1 |
| DM07969P3 | 0.01398439 | 1.2140223  |              |                |
| DM06007P1 | 0.00632377 | 2.1931045  |              |                |
| DM09537P2 | 6.44E-04   | 1.3113307  |              |                |
| DM06905P2 | 0.00504654 | 1.3241856  |              |                |
| DM04317P3 | 0.01974163 | 1.9759663  |              |                |
| DM06708P3 | 0.02551082 | -1.4382709 |              |                |
| DM01752P3 | 0.01195735 | -2.0807066 | LOC733041    | NM_001047033.1 |
| DM02051P3 | 5.89E-05   | -1.2352061 | Prosbeta5    | NM_001126201.2 |
| DM05943P3 | 0.01584249 | 1.463012   | LOC1002077   | XM_002162013.1 |
| DM00696P4 | 0.00158923 | 3.0084717  | bmm          | NM_001169974.1 |
| DM02153P3 | 0.02129594 | 1.7475892  |              |                |
| DM02245P1 | 0.00174227 | -1.3941438 | SAMD         | XM_001658136.1 |
| DM03065P1 | 0.00127173 | -1.14165   | ACTR1A       | XM_001171550.1 |
| DM06944P1 | 8.27E-04   | 1.3102087  |              |                |
| DM11462P1 | 0.00180922 | -2.4067657 |              |                |
| DM05872P2 | 0.00153805 | -1.5928695 |              |                |
| DM12720P4 | 0.01643156 | 1.2813197  |              |                |
| DM03873P4 | 0.01062641 | -1.4668915 | cg2918       | NM_001169174.1 |
| DM11675P1 | 0.0124808  | 1.3548148  |              |                |
| DM06338P2 | 0.01513279 | 2.57112    | LOC410828    | XM_394304.3    |
| DM07215P1 | 0.0052959  | 1.8048236  |              |                |
| DM06463P1 | 0.03142782 | 2.0988681  |              |                |
| DM05833P1 | 0.00728786 | -1.4668674 | LOC663663    | XM_969699.1    |
| DM04478P3 | 0.00633536 | 3.964953   |              |                |
| DM12779P2 | 0.0168115  | 1.3462163  |              |                |
| DM05131P4 | 0.00239719 | 1.3370231  |              |                |
| DM06610P1 | 0.03054206 | 1.6238135  |              |                |
| DM03968P1 | 0.00856203 | 1.9052199  |              |                |
| DM07036P4 | 0.04539671 | -1.7687758 |              |                |
| DM06303P2 | 0.01304344 | 1.2531122  |              |                |
| DM04214P1 | 3.97E-04   | -1.1303171 |              |                |
| DM02575P1 | 0.00692998 | 1.3761021  | LOC1000188   | XM_001371871.1 |
| DM04383P3 | 2.00E-06   | 1.6128143  |              |                |
| DM06370P1 | 0.00520155 | 1.844341   | Dsec\GM249   | XM_002029583.1 |
| DM01477P1 | 0.01636436 | 1.2655597  |              |                |

|           |            |            |              |                |
|-----------|------------|------------|--------------|----------------|
| DM00848P1 | 0.0011931  | -3.843573  |              |                |
| DM00542P1 | 0.03971002 | -1.2542595 | copA         | XM_536131.2    |
| DM05766P2 | 0.02109817 | 1.474494   |              |                |
| DM00281P1 | 0.00543857 | 1.1371268  | MUT          | XM_532164.2    |
| DM02146P1 | 0.00395884 | 1.2044344  | Dsec\GM1854  | XM_002037896.1 |
| DM00787P2 | 0.04603576 | -1.4482867 | HSP90B1      | XM_001662901.1 |
| DM00248P3 | 0.00621135 | 1.2618454  | U1C          | XM_001844951.1 |
| DM00052P3 | 0.00863187 | -1.6946143 | IscW_ISCW02  | XM_002403711.1 |
| DM14310P1 | 0.00439735 | 1.7786804  |              |                |
| DM13630P3 | 0.00365673 | 4.6214085  | Dvir\GJ12666 | XM_002046130.1 |
| DM13062P1 | 1.10E-04   | -1.6075836 |              |                |
| DM01137P3 | 0.03654448 | 1.1817874  | Dsim\GD1987  | XM_002102333.1 |
| DM09967P3 | 0.01501001 | -1.5943466 |              |                |
| DM02531P1 | 0.00108221 | 1.8061374  | Dere\GG1838  | XM_001977151.1 |
| DM05718P3 | 9.22E-04   | -3.0507178 |              |                |
| DM00789P1 | 0.00604246 | -1.3752731 | SEL1L        | NM_001096558.1 |
| DM03663P3 | 0.00395124 | 1.5433544  | Dana\GF1873  | XM_001955346.1 |
| DM05062P2 | 0.01988398 | -1.4127383 |              |                |
| DM07140P3 | 6.62E-04   | 1.2722454  |              |                |
| DM03997P3 | 0.00410557 | 1.4409465  | LOC10016366  | XM_001944428.1 |
| DM12554P2 | 0.03259578 | 1.1925906  |              |                |
| DM02869P3 | 0.00918022 | 1.8023336  | AaeL_AAEL0C  | XM_001654032.1 |
| DM08459P2 | 0.02142762 | 2.1060038  |              |                |
| DM03370P3 | 0.00368089 | 1.5213541  | cg2767       | NM_001144553.1 |
| DM04155P3 | 2.55E-09   | -1.8806249 | PHYPADRAFT_  | XM_001770168.1 |
| DM11499P1 | 0.00767974 | -2.2647026 |              |                |
| DM11906P1 | 0.03230343 | 1.4371135  |              |                |
| DM12510P2 | 0.00947696 | 1.7425342  |              |                |
| DM00321P2 | 0.00581375 | 1.3761959  | MONBRDRAFT_  | XM_001749025.1 |
| DM14660P1 | 2.39E-04   | 1.6811031  |              |                |
| DM02343P3 | 2.51E-05   | -1.1327271 | Dyak\GE1699  | XM_002100305.1 |
| DM02855P3 | 0.01807368 | 1.5807999  |              |                |
| DM05560P3 | 0.0017954  | 2.343446   |              |                |
| DM00694P4 | 0.02947024 | -1.4061428 | LOC10007785  | XM_001508945.1 |
| DM03925P2 | 0.01959569 | -1.5559535 | SEC61        | XM_001649279.1 |
| DM10371P2 | 4.25E-04   | -1.4568942 |              |                |
| DM04955P2 | 0.00110321 | 2.4855974  |              |                |
| DM00255P2 | 0.01619457 | 2.3357773  | Dgri\GH1267  | XM_001991443.1 |
| DM00021P1 | 0.0024588  | -1.2860682 | NEMVEDRAFT   | XM_001627260.1 |
| DM10656P4 | 0.02170864 | 1.239476   |              |                |
| DM06127P1 | 8.42E-04   | 1.761562   | AgaP_AGAP0C  | XM_308594.4    |
| DM04364P3 | 0.01833421 | 1.4659961  |              |                |
| DM09845P3 | 0.00227906 | 1.4594702  |              |                |
| DM12065P2 | 2.00E-06   | -1.8018091 |              |                |
| DM09081P2 | 0.01156991 | 1.545377   |              |                |
| DM05232P2 | 0.00614903 | -1.4394164 |              |                |
| DM11602P2 | 0.00251762 | -1.2167838 | LOC656519    | XM_963045.2    |
| DM03825P3 | 0.01830648 | -1.3359861 |              |                |
| DM01862P3 | 4.24E-04   | -1.4070522 | Dana\GF2042  | XM_001963438.1 |

|           |            |            |             |                |
|-----------|------------|------------|-------------|----------------|
| DM08360P3 | 4.42E-05   | -14.929511 |             |                |
| DM03312P2 | 0.00732498 | 1.7056556  |             |                |
| DM00010P4 | 0.00412234 | 1.6602291  | LOC1000140  | XM_001368331.1 |
| DM06372P1 | 0.01753658 | 1.6190232  |             |                |
| DM14575P1 | 6.36E-04   | -1.9019923 |             |                |
| DM02296P3 | 0.0237622  | 1.4262513  | wipi2       | XM_856866.1    |
| DM10583P3 | 0.01207654 | 1.3213342  |             |                |
| DM00373P3 | 0.00127843 | -1.2444451 | MANF        | XM_625020.2    |
| DM05809P1 | 0.00327057 | -1.5409759 |             |                |
| DM02334P1 | 0.00265732 | -1.2335308 | Pros45      | NM_134603.1    |
| DM02455P1 | 0.02406578 | -1.5354526 |             |                |
| DM05574P1 | 0.03063505 | -1.835361  |             |                |
| DM12171P1 | 0.02264553 | 1.4115055  |             |                |
| DM12810P1 | 0.0040836  | -3.701189  |             |                |
| DM01016P1 | 0.02220596 | -1.2277662 | Dwi\NGK1274 | XM_002074164.1 |
| DM08218P2 | 3.34E-04   | -2.3017223 |             |                |
| DM14321P1 | 5.33E-05   | 1.4796002  |             |                |
| DM02409P1 | 0.00633523 | -1.3554459 | LOC1000566  | XM_001502591.2 |
| DM10233P1 | 0.02365423 | -1.7822915 |             |                |
| DM11208P3 | 6.27E-11   | -2.7923474 |             |                |
| DM02125P3 | 0.01148647 | 1.3999324  |             |                |
| DM04583P2 | 1.32E-05   | -1.826746  |             |                |
| DM12322P1 | 0.01298487 | 1.2154317  |             |                |
| DM09909P4 | 0.00739235 | 1.7207628  |             |                |
| DM03718P3 | 0.02008858 | 2.5667477  |             |                |
| DM06424P3 | 0.01711509 | -1.5475726 |             |                |
| DM06946P1 | 0.01439972 | 1.5619868  |             |                |
| DM02439P3 | 0.04675621 | 1.4092664  | LOC592365   | XM_791891.1    |
| DM12083P3 | 0.00695375 | 2.02305    |             |                |
| DM05949P2 | 0.00495372 | 1.668379   | LOC658676   | XM_965040.1    |
| DM11926P2 | 0.04327261 | -1.2336229 |             |                |
| DM11400P2 | 0.00273999 | 1.484868   |             |                |
| DM15092P2 | 0.03457198 | 1.7996299  |             |                |
| DM08720P2 | 0.01109725 | 1.4492706  |             |                |
| DM13297P1 | 0.02037359 | 1.2300564  |             |                |
| DM03145P3 | 0.00263576 | -4.4522595 | LOC1002744  | NM_001148825.1 |
| DM13944P2 | 0.01337829 | 1.8795817  |             |                |
| DM02434P1 | 0.04791232 | -1.3895366 | Dmoj\GI1808 | XM_002003736.1 |
| DM12666P2 | 0.01963572 | 1.3374104  |             |                |
| DM11824P1 | 0.00386641 | -1.491213  | LOC1001682  | XM_001946431.1 |
| DM05711P3 | 0.00448805 | 1.5443571  |             |                |
| DM08578P1 | 0.00390991 | 1.8162444  |             |                |
| DM05384P3 | 0.01569828 | 2.255615   |             |                |
| DM05815P3 | 0.0341946  | 1.8281275  |             |                |
| DM02932P1 | 0.02192228 | 1.4831376  |             |                |
| DM11644P3 | 2.87E-04   | 1.7420121  |             |                |
| DM06954P2 | 1.95E-04   | 1.2271882  |             |                |
| DM04845P1 | 1.73E-04   | -1.12496   | LOC1001191  | XM_001602923.1 |
| DM09287P1 | 3.17E-06   | -2.8197997 |             |                |

|           |            |            |             |                |
|-----------|------------|------------|-------------|----------------|
| DM01744P1 | 0.0034163  | 1.2779526  | LOC552832   | XM_625207.1    |
| DM03807P3 | 1.17E-05   | 5.919261   | CG10663     | NM_001104123.1 |
| DM10926P3 | 0.00909992 | 1.4770747  |             |                |
| DM12917P1 | 0.00256433 | -1.6163505 |             |                |
| DM02238P2 | 8.29E-04   | 2.647914   |             |                |
| DM12114P2 | 0.00196255 | 1.5626885  |             |                |
| DM12383P3 | 0.04166738 | 1.8181136  |             |                |
| DM02919P3 | 0.00854411 | 1.4445527  |             |                |
| DM01373P2 | 0.00688194 | 1.53746    | Dpse\GA1901 | XM_001358143.2 |
| DM12768P1 | 0.04920212 | 1.711013   |             |                |
| DM12661P1 | 0.02686916 | -1.24376   |             |                |
| DM11110P4 | 0.00705108 | -2.3640175 |             |                |
| DM01784P1 | 0.01289164 | -1.3435237 | Dsec\GM177E | XM_002043825.1 |
| DM05567P1 | 0.00250013 | 2.3999627  |             |                |
| DM12133P2 | 2.45E-04   | -4.403198  |             |                |
| DM11543P2 | 0.04591597 | 1.8536298  |             |                |
| DM00895P1 | 0.00698272 | -1.2215993 | Dgri\GH1940 | XM_001990498.1 |
| DM04060P2 | 1.31E-04   | 2.0375159  |             |                |
| DM00883P1 | 0.00317117 | 1.5455259  | LOC10006369 | XM_001494831.2 |
| DM00887P1 | 1.39E-05   | 1.2225754  | AaeL_AAEL01 | XM_001664052.1 |
| DM09640P3 | 8.08E-04   | 3.2610638  |             |                |
| DM08053P2 | 0.00237479 | 3.8694947  |             |                |
| DM00965P3 | 0.00255931 | -1.3964604 | LOC10011538 | XM_001599682.1 |
| DM01524P3 | 0.03155522 | -1.2416632 | Atp6v0b     | NM_199561.1    |
| DM02793P1 | 0.03081601 | -1.3153197 | LOC409755   | XM_393249.3    |
| DM06319P2 | 1.97E-04   | 3.769371   | SNOG_05978  | XM_001796314.1 |
| DM03267P2 | 0.01829079 | 2.4099472  |             |                |
| DM10524P2 | 0.00440655 | -2.0187533 |             |                |
| DM01570P1 | 0.0032713  | -1.2495224 | Rho1        | XM_623222.2    |
| DM07891P3 | 0.00657021 | 1.5435257  |             |                |
| DM07683P1 | 8.57E-04   | 5.5623503  |             |                |
| DM01964P1 | 0.00434063 | -1.1755291 | Dere\GG2278 | XM_001979637.1 |
| DM12735P3 | 0.03857781 | 1.9651573  |             |                |
| DM08719P1 | 0.03940868 | 1.219946   |             |                |
| DM13474P3 | 5.36E-06   | 3.6485147  |             |                |
| DM13077P3 | 0.02351164 | -1.248229  |             |                |
| DM06967P3 | 0.018845   | -1.6345782 |             |                |
| DM09227P3 | 0.04099809 | 1.2314652  |             |                |
| DM01742P2 | 1.28E-05   | -9.885135  |             |                |
| DM08531P2 | 5.30E-04   | 2.4420245  |             |                |
| DM07375P1 | 0.0355037  | -1.1438575 |             |                |
| DM00776P2 | 0.00454214 | -1.2313966 |             |                |
| DM12812P1 | 0.04193846 | 5.441798   |             |                |
| DM14982P1 | 0.00289559 | 1.751483   |             |                |
| DM01536P1 | 0.00125672 | -1.1271411 | Mtmr12      | NM_001135516.1 |
| DM00802P3 | 0.00536224 | 1.3027363  | LOC552832   | XM_625207.1    |
| DM06569P2 | 0.01493675 | 1.9135151  |             |                |
| DM05112P2 | 0.00416812 | -1.3604071 |             |                |
| DM06065P2 | 0.03450939 | 1.1915312  | LOC10007543 | XM_001506879.1 |

|           |            |            |                            |
|-----------|------------|------------|----------------------------|
| DM05207P1 | 7.89E-04   | -2.3575456 |                            |
| DM09700P1 | 2.11E-04   | 1.286389   |                            |
| DM12137P2 | 0.0121068  | -1.2266867 |                            |
| DM07923P1 | 0.00880027 | 1.7375724  |                            |
| DM04297P3 | 0.00445221 | 1.9650002  |                            |
| DM06808P1 | 0.00414012 | 1.8185169  |                            |
| DM06359P3 | 0.01008919 | 1.4114778  | IscW_ISCW02 XM_002414028.1 |
| DM10455P1 | 0.00728536 | 1.6240982  |                            |
| DM05500P1 | 0.01553963 | 1.1998382  |                            |
| DM09790P1 | 0.02705281 | 1.2531573  |                            |
| DM02858P4 | 0.01087333 | 1.3011899  | Dgri\GH2277 XM_001995140.1 |
| DM10085P1 | 8.65E-05   | -1.7558584 |                            |
| DM11442P1 | 0.00545004 | -1.188279  |                            |
| DM01820P3 | 0.00137872 | 1.3523649  |                            |
| DM01639P2 | 0.01624304 | -1.2769204 | Dwi\GK1274 XM_002074169.1  |
| DM11154P3 | 0.02182892 | 1.1761371  |                            |
| DM07677P1 | 0.01646703 | 1.4394431  |                            |
| DM04071P2 | 8.72E-05   | 1.4911865  |                            |
| DM08196P4 | 0.0020807  | -1.5998951 |                            |
| DM07495P1 | 0.00226008 | -1.7118709 |                            |
| DM04502P1 | 0.00832852 | -1.5575902 |                            |
| DM03070P2 | 0.00795447 | -1.3096681 | BRAFLDRAFT_XM_002607778.1  |
| DM01094P1 | 0.00492553 | 1.383665   | TRIADDRAFT_XM_002117079.1  |
| DM08064P1 | 0.01697659 | 1.9746213  | Dmoj\GI1450 XM_002001889.1 |
| DM11430P1 | 0.00825303 | -1.3622681 |                            |
| DM04635P1 | 0.04251397 | -1.33058   |                            |
| DM07868P3 | 0.02611033 | -1.3907987 |                            |
| DM01347P1 | 0.00434693 | 1.5322255  | LOC594823 XM_794247.2      |
| DM08148P1 | 0.00791921 | 1.8346858  |                            |
| DM09929P1 | 0.0424876  | 1.7227031  |                            |
| DM09942P2 | 0.01061674 | 1.5944953  |                            |
| DM12183P2 | 1.84E-04   | 2.6241179  |                            |
| DM12531P2 | 0.00636103 | 1.5497063  |                            |
| DM10053P2 | 0.00852346 | 6.2343574  |                            |
| DM04370P2 | 0.01271947 | 1.3440945  |                            |
| DM09658P2 | 0.03206289 | 1.4075122  |                            |
| DM00953P1 | 0.02134373 | -1.2237133 | CYB5R3 XM_780154.2         |
| DM13359P1 | 0.04437639 | 4.328061   |                            |
| DM03513P1 | 0.00791204 | -1.2333846 | Dmoj\GI1108 XM_002002751.1 |
| DM05224P3 | 0.00145529 | 2.7231812  |                            |
| DM00302P1 | 0.0047207  | -1.255142  | LOC662115 XM_968232.1      |
| DM07337P1 | 0.00367942 | 1.8577745  |                            |
| DM11966P2 | 0.02780491 | -1.6894557 |                            |
| DM00292P2 | 6.75E-04   | -1.2291116 | BRAFLDRAFT_XM_002608112.1  |
| DM03428P1 | 3.06E-04   | -1.8877748 | LOC1000676 XM_001504717.2  |
| DM07845P1 | 0.01796155 | 2.317573   |                            |
| DM10432P2 | 0.0187466  | 1.2268106  |                            |
| DM12940P2 | 0.0273834  | -1.2081655 |                            |
| DM12614P2 | 7.78E-05   | -13.005275 |                            |

|           |            |            |                             |
|-----------|------------|------------|-----------------------------|
| DM05447P1 | 0.02171395 | 1.1616604  |                             |
| DM08350P1 | 4.62E-04   | 3.3473861  |                             |
| DM10763P1 | 0.00179777 | 1.5377443  |                             |
| DM02649P3 | 2.95E-05   | 1.7039545  | CpipJ_CPIJ01 XM_001857207.1 |
| DM06801P2 | 0.02499453 | 2.7884817  |                             |
| DM11157P3 | 0.01715109 | 1.2652777  |                             |
| DM00458P4 | 0.0153967  | 1.8161393  | LOC657023 XM_963512.2       |
| DM02485P1 | 0.00543046 | -2.1215293 | NEMVEDRAFT XM_001628525.1   |
| DM11784P2 | 0.00951536 | -1.2869288 |                             |
| DM02866P4 | 0.00451279 | 1.2366842  | NEMVEDRAFT XM_001624461.1   |
| DM10967P1 | 0.03902899 | -1.1721799 |                             |
| DM08832P1 | 0.00398548 | -1.2187155 |                             |
| DM02218P1 | 9.00E-05   | -2.8884215 |                             |
| DM06826P2 | 0.0065276  | -1.6865199 |                             |
| DM05274P1 | 0.04756812 | 2.1587832  |                             |
| DM06449P3 | 0.04831162 | -3.2544427 | POPTRDRAFT XM_002337327.1   |
| DM02283P1 | 5.50E-06   | -1.7965782 | IscW_ISCW0 XM_002416102.1   |
| DM04344P1 | 2.18E-04   | -1.6413057 |                             |
| DM12412P2 | 0.00338246 | 1.8739442  |                             |
| DM14301P3 | 0.03431439 | 1.4433084  |                             |
| DM11931P1 | 0.01036019 | 4.739804   |                             |
| DM10111P1 | 0.00394573 | 1.5092199  |                             |
| DM04837P3 | 0.00165599 | 1.1764928  | LOC1001138 XM_001602665.1   |
| DM06042P3 | 0.00849071 | -1.7404958 | LOC1001875 XM_002125820.1   |
| DM09635P2 | 0.02271978 | 1.175083   |                             |
| DM04682P4 | 0.01786538 | 1.2098783  |                             |
| DM06446P2 | 2.07E-05   | -1.217079  | LOC1002103 XM_002166106.1   |
| DM12722P1 | 0.03897451 | 1.6407663  |                             |
| DM05257P1 | 0.00437899 | -1.31909   | NEMVEDRAFT XM_001633252.1   |
| DM11399P1 | 0.00146043 | 1.6069156  |                             |
| DM05014P1 | 0.00730179 | -1.3760335 |                             |
| DM00111P1 | 0.01156884 | -1.2055262 | LOC1001229 XM_001606506.1   |
| DM01613P4 | 0.04380748 | 1.6905452  | Dsim\GD140 XM_002083947.1   |
| DM00968P2 | 0.00498089 | 2.3064208  | Dsec\GM1275 XM_002037109.1  |
| DM08153P3 | 0.04915145 | 1.3056976  |                             |
| DM04648P3 | 5.05E-04   | -2.0851138 |                             |
| DM07669P1 | 0.00156312 | 1.3267602  |                             |
| DM08638P2 | 0.00619973 | 1.299345   |                             |
| DM07130P3 | 0.0256288  | 6.0726366  |                             |
| DM14739P3 | 0.01326531 | -1.194011  |                             |
| DM12590P1 | 0.02857962 | -1.3355011 |                             |
| DM00025P2 | 0.00730096 | -1.3830047 | LOC1002013 XM_002162742.1   |
| DM02984P3 | 4.10E-07   | -2.8041391 |                             |
| DM10773P1 | 0.00494869 | 1.6121604  |                             |
| DM15398P1 | 0.0080795  | 1.5820228  |                             |
| DM01446P1 | 0.00186162 | 2.036138   |                             |
| DM08933P1 | 0.03659987 | -1.2035853 |                             |
| DM03210P2 | 0.02866527 | 1.4648892  | NEMVEDRAFT XM_001640486.1   |
| DM01617P3 | 0.00730229 | 2.058299   | SNOG_05978 XM_001796314.1   |

|           |            |            |                           |                |
|-----------|------------|------------|---------------------------|----------------|
| DM05914P3 | 3.41E-05   | -2.3639855 |                           |                |
| DM08755P3 | 0.01964159 | 6.902769   | HYR10                     | XM_001384426.1 |
| DM01864P2 | 0.00261983 | -1.3344223 | TRIADDRAFT_XM_002114628.1 |                |
| DM03328P2 | 0.00420513 | 1.6753346  | Dvir\GJ12666              | XM_002046130.1 |
| DM12363P3 | 0.04006093 | 2.0152612  | AT5G09345                 | NR_023116.1    |
| DM01633P2 | 6.02E-04   | -1.2259653 | Dwil\GK1274               | XM_002074169.1 |
| DM02472P4 | 0.00296138 | 1.591909   |                           |                |
| DM07428P3 | 0.01628551 | 2.0229354  | TTHERM_000                | XM_001014892.2 |
| DM12797P3 | 0.00882722 | 32.16642   | Dvir\GJ16324              | XM_002060216.1 |
| DM02845P3 | 8.52E-04   | -1.3482316 |                           |                |
| DM11986P3 | 3.07E-04   | -1.3169993 | Canx                      | XM_001150972.1 |
| DM08772P1 | 0.01760086 | 1.627673   |                           |                |
| DM04486P2 | 0.00340451 | 1.2206042  |                           |                |
| DM13612P1 | 0.04082459 | -1.4440949 | BRAFLDRAFT_XM_002595567.1 |                |
| DM02831P3 | 1.94E-04   | 3.5415688  | LOC789799                 | XM_001256447.2 |
| DM09217P1 | 0.02653239 | 1.4869399  |                           |                |
| DM11316P2 | 3.89E-04   | 1.9694351  |                           |                |
| DM04295P1 | 0.0010403  | 7.647074   |                           |                |
| DM11230P2 | 0.0162493  | 1.4063157  |                           |                |
| DM06797P1 | 0.00624972 | 4.7851386  |                           |                |
| DM03011P2 | 5.41E-05   | 1.4048798  | YALIOF05962               | XM_505057.1    |
| DM13349P1 | 0.02039465 | -1.1669127 |                           |                |
| DM08685P4 | 0.00139094 | 1.4087447  |                           |                |
| DM08249P4 | 0.02628917 | 1.9235756  |                           |                |
| DM11435P1 | 0.03200856 | 2.3880143  |                           |                |
| DM06712P2 | 0.00296733 | 1.5416101  |                           |                |
| DM04705P1 | 0.00968826 | 1.4819914  |                           |                |
| DM05262P1 | 0.01455583 | -1.9193037 |                           |                |
| DM09670P1 | 4.29E-04   | 2.987067   |                           |                |
| DM10472P3 | 0.0251168  | 1.4989074  |                           |                |
| DM01698P2 | 0.01324334 | -1.2301646 | Dper\GL2219               | XM_002017197.1 |
| DM12730P3 | 2.57E-04   | 1.3575228  |                           |                |
| DM14922P3 | 1.78E-04   | 2.646507   | TTHERM_002                | XM_001023862.2 |
| DM04058P1 | 0.00154057 | 6.213359   |                           |                |
| DM01130P2 | 0.02955622 | 1.6450963  | CYP4V2                    | NM_001092584.1 |
| DM00701P1 | 0.01063269 | -1.3810642 | SND1                      | XM_532436.2    |
| DM06838P1 | 0.03371379 | 2.6788542  |                           |                |
| DM12524P2 | 2.72E-06   | -1.5050758 |                           |                |
| DM05093P1 | 0.04169142 | 1.3365624  |                           |                |
| DM14869P1 | 0.00238645 | 1.4789014  |                           |                |
| DM01233P4 | 0.00291568 | 1.5200124  | CpipJ_CPIJ00              | XM_001849333.1 |
| DM06323P1 | 1.33E-05   | -1.4857265 |                           |                |
| DM11994P1 | 0.01114985 | 1.2525603  |                           |                |
| DM10070P3 | 0.02107638 | -1.3252331 |                           |                |
| DM02247P2 | 0.01192425 | -1.4891596 | Dana\GF1416               | XM_001962943.1 |
| DM07193P2 | 0.03928622 | -1.3725263 |                           |                |
| DM07273P2 | 7.77E-05   | 1.659563   |                           |                |
| DM06005P2 | 8.31E-05   | 1.4483861  |                           |                |
| DM04653P1 | 0.00266403 | 2.4473617  |                           |                |



|           |            |            |             |                |
|-----------|------------|------------|-------------|----------------|
| DM08162P2 | 2.49E-04   | -2.209822  |             |                |
| DM11775P4 | 1.85E-04   | 2.1964173  |             |                |
| DM07362P4 | 0.03068491 | 1.4463143  |             |                |
| DM04480P2 | 0.01952781 | 1.5073471  | AgaP_AGAP0  | XM_001688796.1 |
| DM03007P2 | 0.01662214 | -1.3363041 | LOC663663   | XM_969699.1    |
| DM12024P2 | 0.04372623 | -1.2760766 |             |                |
| DM03651P1 | 0.00955904 | 1.5784605  | MGC165715   | NM_001102129.1 |
| DM07740P1 | 0.04497901 | 1.315217   |             |                |
| DM10478P1 | 0.00478828 | 1.299613   |             |                |
| DM09030P1 | 0.02930929 | 1.3823465  |             |                |
| DM01800P2 | 0.00153174 | -1.3116581 | Dere\GG2502 | XM_001980943.1 |
| DM08013P3 | 0.00113257 | -2.9774702 | LOC10013625 | NM_001124521.1 |
| DM01263P3 | 4.97E-04   | -1.1464964 | Dana\GF2263 | XM_001965663.1 |
| DM12118P2 | 0.00330353 | 1.7616863  | Dere\GG1725 | XM_001980589.1 |
| DM08376P1 | 0.01386661 | 2.0013897  |             |                |
| DM08678P1 | 0.02606744 | -1.411133  |             |                |
| DM06300P1 | 0.0136811  | -1.3046789 |             |                |
| DM12846P1 | 0.00293758 | 1.4840382  |             |                |
| DM07678P2 | 0.00636637 | 1.6952826  |             |                |
| DM07685P2 | 8.97E-04   | 1.4747994  |             |                |
| DM07331P2 | 0.01315262 | 1.4636571  |             |                |
| DM05415P1 | 0.00237779 | 1.4788231  |             |                |
| DM05840P4 | 0.00193581 | 3.1365502  |             |                |
| DM15042P1 | 0.00183213 | 1.4322956  |             |                |
| DM06422P2 | 0.00413734 | 1.3967022  |             |                |
| DM03080P2 | 0.01227681 | -1.2540778 | BRAFLDRAFT_ | XM_002601566.1 |
| DM12816P1 | 0.0093895  | 1.6975486  |             |                |
| DM14261P2 | 0.01018825 | 1.3928616  |             |                |
| DM05216P1 | 0.00595589 | 6.380978   |             |                |
| DM07782P1 | 3.51E-04   | 2.2742064  |             |                |
| DM06420P1 | 0.03154583 | 2.5144045  |             |                |
| DM10054P1 | 0.01611088 | 1.2474213  |             |                |
| DM04579P3 | 0.03917901 | 5.249328   |             |                |
| DM10315P2 | 0.0379896  | 1.9211638  |             |                |
| DM02677P3 | 1.58E-05   | 2.2857091  |             |                |
| DM06924P4 | 0.01012293 | 1.395168   |             |                |
| DM02778P3 | 0.00806595 | 1.1470387  | Dgri\GH1062 | XM_001988289.1 |
| DM00853P3 | 0.0149795  | -1.4122534 | Dere\GG1478 | XM_001971085.1 |
| DM06852P2 | 0.02120086 | -2.2007775 |             |                |
| DM02305P3 | 0.01442345 | -1.6201236 | LOC660193   | XM_966447.2    |
| DM12231P2 | 0.01658337 | 1.5518818  |             |                |
| DM08270P1 | 0.00385422 | 1.7850345  |             |                |
| DM04450P3 | 0.00562482 | 1.9093481  |             |                |
| DM00975P3 | 0.02888166 | 1.1441388  |             |                |
| DM06055P1 | 0.01116165 | 2.5966148  | tat-6       | NM_071457.1    |
| DM04499P1 | 0.02618898 | 1.2824374  |             |                |
| DM07474P4 | 0.00246379 | 1.9834788  |             |                |
| DM12973P3 | 0.01602197 | 1.5772264  |             |                |
| DM09975P2 | 0.0091055  | 1.6526079  |             |                |

|           |            |            |                           |                |
|-----------|------------|------------|---------------------------|----------------|
| DM04879P4 | 0.00472987 | -1.6584028 |                           |                |
| DM10715P2 | 0.01457329 | 1.2484847  |                           |                |
| DM00218P3 | 0.00924298 | -1.5041627 | TRIADDRAFT_XM_002109793.1 |                |
| DM08940P2 | 5.63E-04   | 1.7171946  |                           |                |
| DM05007P1 | 0.00418794 | 1.3716413  | CLN3                      | XM_523328.2    |
| DM03434P3 | 0.03152638 | 1.2241957  | LOC590798                 | XM_001193300.1 |
| DM10619P4 | 1.17E-05   | -1.2893786 |                           |                |
| DM02487P3 | 0.00894828 | 1.6244274  | LOC1002270                | XM_002191176.1 |
| DM12766P2 | 0.02371317 | 2.4658966  |                           |                |
| DM11882P2 | 0.02216589 | -1.4740132 |                           |                |
| DM06383P2 | 0.00554638 | 3.4231355  |                           |                |
| DM01809P3 | 0.02200096 | 1.6849159  |                           |                |
| DM14771P2 | 0.00113741 | 2.131718   |                           |                |
| DM12154P2 | 0.02015181 | 1.6088789  |                           |                |
| DM12341P1 | 0.03753841 | 4.814336   |                           |                |
| DM01705P4 | 0.04475218 | 1.218597   | apl2                      | NM_001142276.1 |
| DM14481P3 | 0.01662429 | 2.0612867  |                           |                |
| DM09569P3 | 0.01257035 | 2.009339   |                           |                |
| DM09656P1 | 0.01484058 | 1.2466056  |                           |                |
| DM07251P2 | 0.02629155 | 5.077276   |                           |                |
| DM02707P2 | 0.02207503 | 1.3517307  | CTH                       | NM_145953.2    |
| DM11902P1 | 0.00605504 | 1.6238089  |                           |                |
| DM10838P2 | 0.01196103 | 1.4282267  |                           |                |
| DM06044P1 | 0.00281144 | -1.6527685 |                           |                |
| DM08098P2 | 0.00960158 | 1.6518927  |                           |                |
| DM12253P4 | 0.00149022 | 1.6684308  |                           |                |
| DM14288P2 | 0.01689627 | -1.9463923 |                           |                |
| DM11159P1 | 0.01338232 | 1.67931    |                           |                |
| DM14697P3 | 0.0302433  | 1.3408333  |                           |                |
| DM11118P3 | 0.01404893 | -1.3611695 |                           |                |
| DM10469P3 | 1.15E-04   | 1.2858449  |                           |                |
| DM11354P1 | 0.00498243 | 4.149077   |                           |                |
| DM10412P2 | 0.03734752 | 1.21062    |                           |                |
| DM06598P1 | 0.01242967 | -1.4774528 |                           |                |
| DM04894P2 | 4.44E-05   | -2.887112  |                           |                |
| DM07111P3 | 0.00498795 | 1.8032627  |                           |                |
| DM12834P1 | 2.16E-05   | -4.655242  |                           |                |
| DM01448P4 | 0.00226137 | -1.325749  | LOC1001617                | XM_001950712.1 |
| DM01529P2 | 0.0439375  | -1.5592277 | Dper\GL2262               | XM_002024692.1 |
| DM09121P1 | 0.00309363 | 2.115552   |                           |                |
| DM07978P2 | 0.0034557  | 1.5780963  |                           |                |
| DM05425P2 | 0.01686497 | 1.5037477  |                           |                |
| DM00587P3 | 0.00318385 | 1.8136021  | LOC412744                 | XM_396197.3    |
| DM08427P1 | 0.0177652  | 1.346548   |                           |                |
| DM11328P1 | 0.00773993 | 1.7599249  |                           |                |
| DM05279P3 | 0.00541844 | -4.351204  | POPTRDRAFT_XM_002335211.1 |                |
| DM00451P3 | 0.00378791 | -2.2313607 | BRAFLDRAFT_XM_002612935.1 |                |
| DM14182P2 | 2.03E-06   | -1.6195599 |                           |                |
| DM14968P3 | 7.88E-04   | 1.6045673  |                           |                |

|           |            |            |             |                |
|-----------|------------|------------|-------------|----------------|
| DM00206P2 | 8.98E-04   | -1.2508888 | galnt7      | XM_001865749.1 |
| DM10878P2 | 0.00865801 | -1.3356111 |             |                |
| DM10366P1 | 0.00202471 | -1.4038117 | LOC10001976 | XM_001366295.1 |
| DM03806P2 | 5.67E-05   | 2.5873322  | SLC34A1     | NM_001082673.1 |
| DM07237P1 | 0.01012799 | 1.3928912  | DwiI\GK1051 | XM_002074398.1 |
| DM01138P4 | 4.71E-06   | -5.176502  |             |                |
| DM03052P2 | 0.00774816 | -1.4709167 | Dsim\GD2557 | XM_002081658.1 |
| DM00125P3 | 9.26E-04   | -1.5465821 | G6PD        | NM_000402.3    |
| DM03214P3 | 6.02E-05   | 1.5786428  |             |                |
| DM04669P3 | 0.00350646 | -2.825964  |             |                |
| DM07921P1 | 0.01244288 | 1.406702   |             |                |
| DM02639P2 | 0.00531963 | 1.5801884  | RSAD2       | NM_001025556.1 |
| DM07539P1 | 0.00983624 | 1.2914015  |             |                |
| DM02516P3 | 0.03479752 | -1.4795076 | TRAM        | XM_001663502.1 |
| DM13662P2 | 0.01736979 | -1.3711939 |             |                |
| DM00462P2 | 0.00854976 | -1.3214538 | DwiI\GK2214 | XM_002066013.1 |
| DM07473P1 | 0.01884318 | 1.1894333  |             |                |
| DM07144P1 | 5.88E-05   | -2.6190143 |             |                |
| DM05522P4 | 0.01142484 | -1.5718845 |             |                |
| DM01065P4 | 0.01418969 | 1.3048695  | LOC10007392 | XM_001505570.1 |
| DM00097P2 | 0.02653994 | -1.4268789 | DwiI\GK1832 | XM_002075444.1 |
| DM02917P4 | 9.24E-04   | -1.148865  | IscW_ISCW0  | XM_002411321.1 |
| DM07717P2 | 2.36E-04   | -1.5450557 |             |                |
| DM07050P2 | 0.00137485 | -3.147038  |             |                |
| DM11680P3 | 0.03296519 | 1.3203195  |             |                |
