# Supplementary material
Source: PubMed Central journal article supplement (PMC4120942)
Supplement: NIHMS592482-supplement-Supplementary_Data_Table_5.pdf [file NIHMS592482-supplement-Supplementary_Data_Table_5.pdf]

**Table S5: Differentially expressed genes for TNT 1.85 mg/L**

| ProbeName | p          | FC ([1.85] v | GeneSymbol   | RefSeqAccession |
|-----------|------------|--------------|--------------|-----------------|
| DM01050P2 | 0.00255327 | -1.28959     |              |                 |
| DM00247P2 | 3.45E-04   | -1.5816052   | psmb7        | NM_001094066.1  |
| DM10785P2 | 0.01195874 | -1.3810018   |              |                 |
| DM10923P2 | 1.48E-04   | -1.4447641   |              |                 |
| DM02446P1 | 0.01282905 | -1.3349968   | NEMVEDRAFT   | XM_001639323.1  |
| DM04548P2 | 0.00117099 | 1.4119301    | IRAK4        | NM_001145258.1  |
| DM13003P2 | 5.77E-04   | -3.0013633   |              |                 |
| DM02550P3 | 9.71E-04   | 1.40537      |              |                 |
| DM12308P3 | 0.01396774 | 1.4328337    | PTPRA        | NM_001127950.1  |
| DM02229P1 | 0.00166264 | -1.411195    | Dyak\GE141C  | XM_002092255.1  |
| DM03475P3 | 0.00275688 | -1.7048621   |              |                 |
| DM02822P1 | 0.00499716 | -1.3005623   |              |                 |
| DM03815P2 | 0.01128379 | 1.6400094    | Dper\GL2496  | XM_002021130.1  |
| DM08975P1 | 0.01097291 | 1.2804685    |              |                 |
| DM10845P3 | 0.04701017 | -1.4026456   |              |                 |
| DM01319P2 | 0.00308002 | -1.517211    | LOC659830    | XM_966102.2     |
| DM11319P2 | 0.00668039 | -1.494126    |              |                 |
| DM12291P1 | 0.02695655 | 1.462394     |              |                 |
| DM09305P1 | 7.42E-04   | -1.3138427   |              |                 |
| DM01248P1 | 0.00104628 | 1.4848591    | phosrestin-1 | XM_001865064.1  |
| DM07350P3 | 0.00563176 | 1.263295     |              |                 |
| DM04102P1 | 0.01803454 | 1.5832894    |              |                 |
| DM13180P1 | 0.00106515 | 1.4538922    |              |                 |
| DM09195P3 | 0.00592923 | -1.4827675   |              |                 |
| DM01615P1 | 0.03057467 | 1.5458859    | Mhc          | XM_002090481.1  |
| DM00363P1 | 0.01311038 | -1.3244519   | AaeL_AAEL0C  | XM_001654055.1  |
| DM01197P3 | 0.01105548 | -1.507831    | BRAFLDRAFT_  | XM_002609664.1  |
| DM10410P3 | 1.20E-04   | 1.9757987    |              |                 |
| DM03406P3 | 0.01911085 | -1.2169653   | esd          | NM_001984.1     |
| DM03474P1 | 0.02001443 | -1.2787095   | LOC1000288   | XM_001371892.1  |
| DM00498P1 | 0.00301794 | -1.4657024   | LOC692991    | NM_001046828.1  |
| DM04655P3 | 0.00611187 | 1.7674339    | LOC657581    | XM_001811711.1  |
| DM12944P3 | 0.04421511 | -1.4760206   |              |                 |
| DM12815P1 | 0.02034611 | -1.2640289   |              |                 |
| DM10825P2 | 4.38E-05   | -2.4399369   |              |                 |
| DM01205P1 | 0.01668185 | -1.3267968   |              |                 |
| DM06956P2 | 0.003949   | 1.7199341    |              |                 |
| DM03467P3 | 0.04023164 | -1.402332    | AgaP_AGAP0C  | XM_318146.4     |
| DM00672P3 | 0.01616612 | -1.3048162   | Uba1         | XM_001492947.2  |
| DM07136P1 | 0.00717257 | -2.274305    |              |                 |
| DM11701P2 | 0.01450517 | -1.7285821   |              |                 |
| DM02897P2 | 0.04721065 | -1.2615672   | Dgri\GH2084  | XM_001985844.1  |
| DM07230P2 | 0.00308637 | 3.3758957    |              |                 |
| DM08810P1 | 0.04227996 | -1.6144382   |              |                 |
| DM00048P1 | 0.0011997  | -1.4863265   | Rpd3         | NM_001167853.1  |
| DM09793P1 | 0.00283    | -1.2314116   |              |                 |

|           |            |            |             |                |
|-----------|------------|------------|-------------|----------------|
| DM05883P1 | 1.46E-07   | 4.301197   |             |                |
| DM15218P1 | 8.17E-04   | -1.2178909 |             |                |
| DM00629P1 | 0.00599029 | -1.4405346 | Pwp2h       | NM_213047.1    |
| DM00240P2 | 0.03834935 | 1.3082529  | Dper\GL1534 | XM_002020546.1 |
| DM09572P1 | 0.01520776 | -1.4964482 |             |                |
| DM09451P1 | 0.00157795 | -1.6737187 |             |                |
| DM06877P4 | 0.00106447 | -2.5732543 |             |                |
| DM01696P1 | 0.00177383 | 1.5547581  | chit        | XM_001841628.1 |
| DM05034P2 | 0.00820239 | -1.3122661 | LOC10022340 | XM_002191217.1 |
| DM08072P3 | 0.00840039 | 1.2458977  |             |                |
| DM08713P3 | 0.01000522 | -1.4341834 |             |                |
| DM05882P3 | 0.00375121 | -2.8402696 | Dyak\GE2549 | XM_002096070.1 |
| DM01899P2 | 3.16E-04   | -1.7086422 | sf3b3       | NM_001077851.1 |
| DM00928P1 | 0.00468362 | -1.5014426 | snrpd3      | NM_001017093.2 |
| DM11411P3 | 5.71E-04   | -6.7368927 |             |                |
| DM00960P1 | 0.00478365 | -1.199598  | BANF1       | NM_205562.1    |
| DM10954P1 | 0.0059527  | -1.3781844 |             |                |
| DM00119P1 | 0.01599357 | 1.280988   | LOC10006445 | XM_001495360.2 |
| DM03184P1 | 6.22E-04   | 2.0116935  |             |                |
| DM10407P1 | 1.64E-04   | -1.2929529 |             |                |
| DM15458P3 | 0.04885681 | -1.400631  |             |                |
| DM10701P1 | 0.00176272 | -1.5500575 |             |                |
| DM03062P1 | 0.00291917 | -1.5119214 | LOC10016553 | XM_001950795.1 |
| DM02145P2 | 0.00771173 | 1.4290905  | MSF1        | XM_001657148.1 |
| DM01612P4 | 0.0329195  | -1.2878674 | Dana\GF1354 | XM_001960765.1 |
| DM00377P1 | 0.00697579 | -1.3368866 | Dmoj\GI1559 | XM_002009822.1 |
| DM05817P2 | 0.00161496 | 1.45234    |             |                |
| DM10708P3 | 0.01658017 | -1.4122633 | MYH         | XM_001659142.1 |
| DM06696P1 | 0.00321739 | -1.2941742 |             |                |
| DM06155P2 | 0.009038   | 1.6269411  |             |                |
| DM04892P2 | 0.03108056 | -1.7230493 |             |                |
| DM01995P1 | 0.00443073 | -1.3557363 | LOC10016784 | XM_001945366.1 |
| DM01386P1 | 0.03423646 | -1.1606996 | ppm1h       | NM_001140246.1 |
| DM01986P1 | 0.0021878  | -1.5085453 | NEMVEDRAFT  | XM_001626918.1 |
| DM05110P1 | 0.03699996 | -1.5948073 |             |                |
| DM11979P1 | 0.00221286 | 1.2122868  |             |                |
| DM11406P3 | 0.00203295 | 1.2323252  |             |                |
| DM03903P1 | 0.01326134 | 1.4692556  |             |                |
| DM12401P3 | 0.01195961 | -2.2188337 |             |                |
| DM05589P1 | 0.04299079 | -1.2753112 |             |                |
| DM02248P1 | 1.28E-04   | -2.9472487 | Dper\GL1464 | XM_002022622.1 |
| DM07173P1 | 0.01165734 | -1.292262  |             |                |
| DM00239P3 | 0.00827436 | -1.4697002 | LOC10016562 | XM_001949345.1 |
| DM01070P1 | 0.02249015 | 1.4325699  | Dmoj\GI1477 | XM_002010252.1 |
| DM11392P3 | 0.01572718 | 1.3455632  |             |                |
| DM06105P1 | 0.00268822 | -1.4952664 | Dwil\GK2085 | XM_002061292.1 |
| DM08438P1 | 5.63E-04   | -1.3049779 |             |                |
| DM06768P2 | 0.00837415 | 1.2328067  |             |                |
| DM02203P3 | 0.04703221 | -1.4557259 | LOC581865   | XM_001177805.1 |

|           |            |            |              |                |
|-----------|------------|------------|--------------|----------------|
| DM12162P1 | 0.00133107 | 1.3074169  |              |                |
| DM02397P1 | 0.01063721 | -1.666288  | LOC10018750  | XM_002125820.1 |
| DM10127P3 | 0.02112353 | 1.3767239  |              |                |
| DM02489P2 | 0.00916826 | -2.2303646 |              |                |
| DM04873P1 | 0.00347215 | -1.3636687 |              |                |
| DM02353P1 | 0.03204564 | -2.0224693 | LOC10012317  | XM_001606729.1 |
| DM05170P1 | 0.03554269 | 1.270503   |              |                |
| DM03808P2 | 0.00865442 | -1.3759562 |              |                |
| DM00013P1 | 0.0237115  | -1.2861655 | flr          | XM_624085.2    |
| DM09224P1 | 0.02198451 | 1.2465438  |              |                |
| DM03218P3 | 0.02394667 | -1.3023223 |              |                |
| DM09971P1 | 0.00584137 | 1.6192936  | Dyak\GE2465  | XM_002097109.1 |
| DM01522P4 | 0.03754124 | -1.1714576 | LOC10007858  | XM_001509554.1 |
| DM14629P1 | 1.18E-05   | 1.8293389  |              |                |
| DM03524P1 | 0.00412377 | -1.5429534 |              |                |
| DM07846P1 | 0.00660651 | -2.2699518 |              |                |
| DM00067P4 | 0.01552187 | -1.2923225 | Dana\GF2199  | XM_001964843.1 |
| DM00157P1 | 2.33E-04   | -1.6768607 | NEMVEDRAFT   | XM_001634071.1 |
| DM00919P1 | 0.00410606 | -1.3008643 |              |                |
| DM12901P1 | 0.01001326 | -1.6627078 |              |                |
| DM06699P3 | 0.00789329 | 1.5189383  |              |                |
| DM00757P1 | 0.0183084  | -1.3226559 | LOC10016302  | XM_001946462.1 |
| DM01124P2 | 6.91E-04   | -1.3819026 |              |                |
| DM00348P1 | 0.00604409 | -3.4733615 | LOC10008157  | XM_001512289.1 |
| DM01937P1 | 0.01923538 | -1.3057673 | CpipJ_CPIJ00 | XM_001851126.1 |
| DM06346P1 | 0.01189548 | 1.7076607  |              |                |
| DM07642P3 | 0.03277246 | 1.5640024  |              |                |
| DM07019P1 | 0.02581548 | -1.6997459 | IMPDH1       | NM_001017283.2 |
| DM10803P2 | 0.00184912 | -1.8578905 |              |                |
| DM07548P1 | 9.15E-04   | 1.3526641  |              |                |
| DM03780P2 | 0.012824   | -1.3686818 |              |                |
| DM02717P2 | 0.00185144 | 1.6840055  |              |                |
| DM04070P4 | 0.00911982 | -1.9594678 |              |                |
| DM04025P4 | 0.0031778  | -1.6565763 |              |                |
| DM11977P1 | 0.00967267 | -1.2983752 |              |                |
| DM02900P3 | 9.18E-04   | -1.9649729 |              |                |
| DM00395P1 | 0.00622966 | -1.3444749 | LOC10002378  | XM_001375188.1 |
| DM03959P2 | 0.00155999 | -1.432273  |              |                |
| DM05653P1 | 0.00217758 | -1.2231815 |              |                |
| DM05972P3 | 0.00536584 | -3.0547945 |              |                |
| DM12099P4 | 0.01068436 | 4.306479   |              |                |
| DM04118P1 | 0.00319344 | -1.1896204 | LOC10022819  | XM_002187955.1 |
| DM00593P3 | 0.00413584 | -1.6348747 | mcm5-b       | NM_001086540.1 |
| DM11155P2 | 6.21E-04   | 1.4238273  |              |                |
| DM02394P1 | 0.01604632 | -1.5210781 | LOC10002278  | XM_001368952.1 |
| DM00278P3 | 0.00111191 | -1.1896442 | POLR2G       | NM_001017065.3 |
| DM06399P3 | 0.00190151 | -3.4833243 |              |                |
| DM13817P3 | 0.02098616 | -2.6298778 |              |                |
| DM11766P2 | 0.03831754 | -1.3359556 | LOC10005827  | XM_001917933.1 |

|           |            |            |             |                |
|-----------|------------|------------|-------------|----------------|
| DM12802P2 | 0.00896897 | -1.4955391 |             |                |
| DM13744P1 | 0.00474296 | 1.4277353  |             |                |
| DM01913P1 | 0.01079022 | -1.488886  | Dmoj\GI1537 | XM_002001701.1 |
| DM05647P2 | 0.02509817 | 1.7196455  |             |                |
| DM00490P1 | 0.00426464 | -1.4331319 | cct5b       | NM_001097075.1 |
| DM00630P4 | 0.01582885 | -1.2252094 | LOC657452   | XM_963912.1    |
| DM13218P4 | 0.04425733 | 1.4384196  |             |                |
| DM11567P2 | 9.58E-04   | -1.3389864 |             |                |
| DM00729P3 | 0.00434352 | -1.4282185 | AT1G62020   | NM_104882.4    |
| DM00199P3 | 0.01866261 | -1.4111315 | LOC10023008 | XM_002197778.1 |
| DM09590P1 | 0.01089655 | -2.0404518 |             |                |
| DM08210P3 | 0.04197689 | 1.3323635  |             |                |
| DM09537P2 | 6.44E-04   | 1.619388   |             |                |
| DM01825P1 | 0.00793463 | -1.4881223 |             |                |
| DM02222P3 | 0.01900034 | -1.828497  | Dmoj\GI2038 | XM_002005212.1 |
| DM10714P3 | 0.02575416 | -1.2427356 |             |                |
| DM01752P3 | 0.01195735 | -2.427881  | LOC733041   | NM_001047033.1 |
| DM07721P2 | 0.01400033 | -2.5973115 |             |                |
| DM02051P3 | 5.89E-05   | -1.553884  | Prosbeta5   | NM_001126201.2 |
| DM00696P4 | 0.00158923 | 2.195747   | bmm         | NM_001169974.1 |
| DM02245P1 | 0.00174227 | -1.5953078 | SAMD        | XM_001658136.1 |
| DM01641P2 | 0.04217755 | -1.1706429 | LOC10011507 | XM_001607930.1 |
| DM03065P1 | 0.00127173 | -1.2313565 | ACTR1A      | XM_001171550.1 |
| DM06337P4 | 0.01265922 | 1.5857317  |             |                |
| DM06944P1 | 8.27E-04   | 1.2170203  |             |                |
| DM04806P2 | 3.93E-04   | 1.4400563  |             |                |
| DM11462P1 | 0.00180922 | -2.4749725 |             |                |
| DM05872P2 | 0.00153805 | -1.6296635 |             |                |
| DM07264P1 | 0.00697259 | -1.2594457 |             |                |
| DM06397P2 | 0.03251469 | 1.6370366  |             |                |
| DM03873P4 | 0.01062641 | -1.5618274 | cg2918      | NM_001169174.1 |
| DM04764P2 | 0.00550722 | -1.1769751 |             |                |
| DM06162P1 | 0.004198   | -1.4323266 | Hrp28       | NM_001111354.1 |
| DM01298P3 | 0.00708202 | -1.3657881 | LOC410115   | XM_393599.3    |
| DM04663P1 | 0.01352602 | -1.1994262 | LOC10012222 | XM_001605781.1 |
| DM07102P4 | 0.01156861 | -11.292371 |             |                |
| DM07215P1 | 0.0052959  | 2.0129142  |             |                |
| DM02949P3 | 0.02033212 | -1.3305354 | SNRNP70     | XM_001661556.1 |
| DM11672P2 | 0.00321961 | -1.2577324 |             |                |
| DM04478P3 | 0.00633536 | 3.7378454  |             |                |
| DM12611P4 | 0.00582    | 1.4608959  |             |                |
| DM14668P2 | 0.01896843 | -1.5454254 |             |                |
| DM02399P2 | 0.00590383 | 1.2520502  | LOC10012360 | XM_001607215.1 |
| DM04184P1 | 0.011194   | 1.8321166  |             |                |
| DM11434P1 | 0.00942791 | -2.3704388 |             |                |
| DM11309P3 | 0.01657932 | -1.4913422 |             |                |
| DM14073P1 | 0.01489521 | 1.274645   |             |                |
| DM08870P2 | 6.04E-05   | 2.6528487  |             |                |
| DM01028P3 | 0.02669672 | 1.1684247  |             |                |

|           |            |            |             |                |
|-----------|------------|------------|-------------|----------------|
| DM02237P2 | 0.00536702 | -1.605858  | PHF5A       | XM_001896429.1 |
| DM05898P3 | 3.63E-04   | -1.4321207 | CG3308      | NM_142706.3    |
| DM05131P4 | 0.00239719 | 1.307776   |             |                |
| DM04500P1 | 1.71E-06   | 1.7178578  |             |                |
| DM01000P2 | 0.00169558 | -1.4990541 | LOC10022262 | XM_002187385.1 |
| DM12468P2 | 0.01066186 | 1.5852314  |             |                |
| DM04009P3 | 0.02414257 | -1.3493087 | LOC725146   | XM_001120311.1 |
| DM10582P4 | 4.15E-04   | -1.5290079 |             |                |
| DM08488P1 | 0.01163414 | -1.2706553 |             |                |
| DM05154P2 | 0.00504687 | 1.4203998  | Dgri\GH2173 | XM_001987076.1 |
| DM00565P3 | 0.02738221 | -1.4536124 | AaeL_AAEL01 | XM_001655876.1 |
| DM04214P1 | 3.97E-04   | -1.1848752 |             |                |
| DM11588P2 | 0.01373861 | 1.806923   |             |                |
| DM12439P1 | 0.01171638 | -1.6768602 | Dwil\GK1951 | XM_002062740.1 |
| DM07384P3 | 4.06E-05   | 2.9658747  | Bm1_01955   | XM_001891863.1 |
| DM01207P1 | 0.00823635 | -1.2008375 | Wdr61       | XM_536215.2    |
| DM02575P1 | 0.00692998 | 1.3803002  | LOC10001885 | XM_001371871.1 |
| DM12398P3 | 0.02176395 | 1.695412   |             |                |
| DM11006P2 | 0.00873712 | -1.3920819 |             |                |
| DM05663P1 | 0.00948546 | -1.923998  | LOC411502   | XM_394975.3    |
| DM09347P1 | 0.00347077 | 1.7450479  |             |                |
| DM10996P1 | 0.0013463  | -1.4040966 |             |                |
| DM10032P1 | 0.01749936 | 1.2029399  |             |                |
| DM00440P1 | 0.01575208 | -1.4525274 | AgaP_AGAP00 | XM_318461.2    |
| DM04383P3 | 2.00E-06   | -1.5154971 |             |                |
| DM02527P1 | 3.21E-07   | -2.7666986 | 4CL1        | NM_104046.2    |
| DM09604P1 | 0.00187333 | -1.4305987 |             |                |
| DM02048P1 | 0.00849716 | -1.325892  | FUT6        | XM_001658942.1 |
| DM07688P3 | 0.02564173 | 3.1632528  |             |                |
| DM01477P1 | 0.01636436 | 1.3261194  |             |                |
| DM11590P2 | 0.00629726 | -1.3186692 |             |                |
| DM04063P1 | 0.00350418 | 1.4526241  | LOC10016885 | XM_001946504.1 |
| DM05537P1 | 0.00445727 | -1.1777844 |             |                |
| DM10575P2 | 0.00193036 | 1.5383364  |             |                |
| DM12386P4 | 0.01785838 | -1.1984136 |             |                |
| DM09175P1 | 0.00370591 | -1.4364803 |             |                |
| DM11242P3 | 0.0490888  | -1.5782576 |             |                |
| DM00936P2 | 0.01969603 | -1.2473595 | Acypi006352 | NM_001162188.1 |
| DM01567P2 | 3.61E-04   | 2.3276007  |             |                |
| DM02452P3 | 0.01808402 | 1.6334357  | Dwil\GK2505 | XM_002071558.1 |
| DM00281P1 | 0.00543857 | 1.1388844  | MUT         | XM_532164.2    |
| DM01688P1 | 0.00439007 | -1.3945853 | Dmoj\GI1874 | XM_002006046.1 |
| DM01916P2 | 0.02162893 | -1.5254017 | Dsec\GM1136 | XM_002041744.1 |
| DM02146P1 | 0.00395884 | 1.1655457  | Dsec\GM1854 | XM_002037896.1 |
| DM08663P1 | 0.00788253 | -1.4099246 |             |                |
| DM03985P1 | 0.00220436 | 2.6730566  |             |                |
| DM01876P1 | 0.01048315 | -1.6565974 | NCU01464    | XM_951648.2    |
| DM04647P2 | 0.0088978  | 1.5083419  |             |                |
| DM03327P4 | 0.02081481 | -1.311579  |             |                |

|           |            |            |             |                |
|-----------|------------|------------|-------------|----------------|
| DM04270P2 | 0.00817783 | -1.2278801 | LOC413123   | XM_396574.2    |
| DM06758P2 | 0.00132899 | -1.6048254 |             |                |
| DM04677P2 | 0.00381579 | -1.7331021 |             |                |
| DM10753P2 | 0.01327878 | 1.4066066  |             |                |
| DM07919P1 | 0.00887407 | 1.3369113  |             |                |
| DM10725P2 | 0.00390757 | 1.3799797  |             |                |
| DM03610P3 | 0.00114293 | -1.5840505 | TPP2        | XM_001864524.1 |
| DM06024P2 | 0.0199413  | -1.2159461 | LOC10023061 | XR_053896.1    |
| DM00941P1 | 0.00121201 | -1.1878761 | PSAT1       | NM_001102150.1 |
| DM11276P2 | 0.00694795 | -1.3490434 |             |                |
| DM06784P2 | 0.01148539 | 1.3120676  |             |                |
| DM06434P1 | 0.00611982 | -1.3312974 | LOC584331   | XM_001196118.1 |
| DM08337P1 | 0.03027359 | -1.2402865 |             |                |
| DM03533P1 | 0.03799675 | -1.2769071 |             |                |
| DM11196P3 | 0.00308187 | -1.2237158 |             |                |
| DM11292P1 | 0.01352422 | -1.6207585 |             |                |
| DM01606P1 | 0.00126223 | -1.1801429 | RPLPO       | XM_001851076.1 |
| DM04198P3 | 0.00350708 | 1.7374239  |             |                |
| DM00192P1 | 0.00857681 | -1.2329628 | LOC10011680 | XM_001607793.1 |
| DM00052P3 | 0.00863187 | -1.5527836 | IscW_ISCW02 | XM_002403711.1 |
| DM10627P4 | 9.83E-05   | -1.3233207 |             |                |
| DM14310P1 | 0.00439735 | 1.5772074  |             |                |
| DM12566P1 | 0.00400168 | 1.6203573  |             |                |
| DM02499P3 | 0.01322372 | 1.148016   | Mlc-c       | XM_623501.2    |
| DM11883P3 | 0.00475761 | 1.392616   |             |                |
| DM07311P1 | 0.01738243 | -3.7094262 |             |                |
| DM08070P3 | 0.01001106 | 1.7039775  |             |                |
| DM11072P1 | 0.02336996 | -1.3782573 |             |                |
| DM03124P3 | 0.04197601 | -1.2750005 | TRIADDRAFT  | XM_002117259.1 |
| DM03501P4 | 0.00616848 | -2.256148  |             |                |
| DM05800P1 | 0.02862807 | -1.32104   |             |                |
| DM04084P1 | 0.02007353 | -1.3329313 | Dpse\GA1748 | XM_001361857.2 |
| DM02279P3 | 7.70E-05   | -1.8021985 |             |                |
| DM15066P2 | 0.00347799 | -1.2518823 |             |                |
| DM00273P2 | 0.02174803 | -1.2833465 | IscW_ISCW00 | XM_002407701.1 |
| DM11591P2 | 0.02464191 | -1.3287082 |             |                |
| DM06531P3 | 0.01457443 | -1.2916762 | LOC10016210 | XM_001948045.1 |
| DM11243P2 | 0.00475411 | -1.5909281 |             |                |
| DM01135P1 | 0.03909588 | -1.263451  | LOC10016302 | XM_001946462.1 |
| DM01178P1 | 0.02767916 | 1.4644742  |             |                |
| DM07757P1 | 0.03067711 | 1.2387443  |             |                |
| DM10913P2 | 6.42E-04   | -1.5355204 |             |                |
| DM02531P1 | 0.00108221 | 1.8067964  | Dere\GG1838 | XM_001977151.1 |
| DM05718P3 | 9.22E-04   | -2.1969101 |             |                |
| DM02254P1 | 0.0150819  | -1.3196298 | TUB2        | NM_001043499.1 |
| DM12062P3 | 0.04086532 | 1.3558482  |             |                |
| DM07564P2 | 6.93E-05   | -1.8896575 |             |                |
| DM04519P3 | 0.00358175 | -1.6088501 | LOC412349   | XM_395810.3    |
| DM10818P2 | 0.04148328 | 1.4187673  |             |                |

|           |            |            |              |                |
|-----------|------------|------------|--------------|----------------|
| DM06094P1 | 0.02802833 | -1.3231388 |              |                |
| DM07605P3 | 0.00843475 | -1.500319  |              |                |
| DM11466P1 | 3.98E-04   | -1.6542199 |              |                |
| DM03277P1 | 0.00658439 | -1.2024074 |              |                |
| DM11797P3 | 0.00834324 | -1.2819691 |              |                |
| DM06552P1 | 0.01658215 | 1.7039429  |              |                |
| DM01171P1 | 8.11E-05   | 1.417521   | p45071b38    | XM_001847350.1 |
| DM11108P3 | 0.00373324 | 1.2460442  | Syf2         | NM_001085936.1 |
| DM01718P3 | 3.88E-05   | -5.338226  | Dhrs2        | NM_027790.2    |
| DM05032P1 | 0.02571236 | 1.5528103  |              |                |
| DM12317P1 | 0.00318755 | -1.3774452 | atI2         | XM_001168098.1 |
| DM01117P1 | 2.57E-04   | -1.9845194 | SNRPD1       | NM_001004780.1 |
| DM07468P1 | 9.60E-08   | -2.4090626 |              |                |
| DM12799P1 | 0.01802183 | -1.3044908 |              |                |
| DM04155P3 | 2.55E-09   | 9.2269945  | PHYPADRAFT   | XM_001770168.1 |
| DM04529P3 | 0.01471641 | -1.616945  |              |                |
| DM04410P3 | 0.04504772 | 1.4687104  |              |                |
| DM10693P4 | 6.95E-04   | -1.2714516 |              |                |
| DM03397P3 | 0.0088474  | -1.3404343 | Dsim\GD2079  | XM_002104083.1 |
| DM08817P3 | 0.04585147 | -1.3475223 |              |                |
| DM06432P2 | 0.00498126 | -1.5591561 |              |                |
| DM00974P2 | 0.0294644  | 1.2647232  | LOC10008000  | XM_001510886.1 |
| DM03493P2 | 0.03417523 | 1.2681295  | AaeL_AAEL01  | XM_001661979.1 |
| DM11499P1 | 0.00767974 | -1.8929979 |              |                |
| DM00210P2 | 0.01400137 | -1.3895907 | LOC660183    | XM_966437.2    |
| DM13271P1 | 0.02206131 | -1.2007776 |              |                |
| DM02265P4 | 0.02845345 | 2.0763915  |              |                |
| DM02548P3 | 0.00706221 | -1.4540814 | BRAFLDRAFT   | XM_002605516.1 |
| DM00321P2 | 0.00581375 | 1.4781358  | MONBRDRAFT   | XM_001749025.1 |
| DM15279P1 | 0.03540412 | 1.3375543  |              |                |
| DM00044P3 | 0.0080275  | -1.3576037 | LOC410026    | XM_393513.3    |
| DM14660P1 | 2.39E-04   | 1.9247266  |              |                |
| DM09620P1 | 0.02320412 | -1.3310235 |              |                |
| DM00313P1 | 0.01200504 | -1.3028268 | LOC10016000  | XM_001950296.1 |
| DM02343P3 | 2.51E-05   | -1.2950282 | Dyak\GE1699  | XM_002100305.1 |
| DM11807P2 | 0.04440525 | -1.3175956 |              |                |
| DM12053P2 | 0.00460477 | -1.3781251 |              |                |
| DM05560P3 | 0.0017954  | 1.6870626  |              |                |
| DM00316P4 | 0.00199841 | -1.3392475 | Dsec\GM2118  | XM_002033162.1 |
| DM02156P3 | 0.02085947 | 2.210228   |              |                |
| DM12275P1 | 0.01534618 | 1.3399509  |              |                |
| DM04955P2 | 0.00110321 | 4.020005   |              |                |
| DM00169P2 | 0.00157514 | -1.2279994 | LOC659356    | XM_970683.2    |
| DM01283P1 | 0.00754981 | 1.4074067  | phosrestin-1 | XM_001865064.1 |
| DM00071P3 | 0.00952915 | -1.3492265 | PTRG_02664   | XM_001932962.1 |
| DM05771P2 | 0.03394808 | -1.2088945 |              |                |
| DM00628P2 | 0.01128103 | -1.324116  | LOC578850    | XM_778994.2    |
| DM06672P1 | 2.72E-06   | 1.8587458  |              |                |
| DM09850P1 | 0.00618228 | 1.3132831  |              |                |

|           |            |            |              |                |
|-----------|------------|------------|--------------|----------------|
| DM01015P1 | 0.02283996 | 1.4061974  |              |                |
| DM06858P3 | 6.46E-05   | -1.9501159 |              |                |
| DM03459P3 | 0.01812339 | -1.3761688 |              |                |
| DM11570P2 | 0.00741062 | 1.402518   |              |                |
| DM12387P2 | 0.00832972 | 1.3386009  |              |                |
| DM15020P2 | 0.0065186  | 1.4259313  |              |                |
| DM00021P1 | 0.0024588  | -1.2776576 | NEMVEDRAFT   | XM_001627260.1 |
| DM09416P3 | 0.00413548 | -1.3535968 |              |                |
| DM06259P1 | 0.0074441  | -1.4322264 | Tc00.104705  | XM_803350.1    |
| DM06127P1 | 8.42E-04   | 2.0743809  | AgaP_AGAP00  | XM_308594.4    |
| DM14448P3 | 0.00204366 | -1.5423412 |              |                |
| DM01014P3 | 0.02049764 | 1.7359767  | miox         | NM_017584.5    |
| DM06038P3 | 0.00302788 | 1.391544   | LOC552800    | XM_625175.2    |
| DM03060P3 | 0.00450383 | -1.3258076 | LOC10001274  | XM_001363686.1 |
| DM12065P2 | 2.00E-06   | 1.4817731  |              |                |
| DM14902P3 | 0.00102411 | 2.4941158  |              |                |
| DM11483P3 | 0.01115877 | -1.359888  |              |                |
| DM07319P2 | 0.03257345 | -2.1190588 |              |                |
| DM11602P2 | 0.00251762 | -1.3640457 | LOC656519    | XM_963045.2    |
| DM00102P1 | 0.00450167 | -1.3480737 | CDC5L        | XM_624903.2    |
| DM00243P2 | 0.02810616 | -1.5252787 | LOC10019464  | NM_001139749.1 |
| DM01791P2 | 0.04026914 | -1.1279721 | ubq-1        | NM_171139.3    |
| DM03825P3 | 0.01830648 | -1.3835526 |              |                |
| DM00144P1 | 0.01584183 | -1.2937466 | Dvir\GJ18121 | XM_002057389.1 |
| DM00010P4 | 0.00412234 | 1.664003   | LOC10001407  | XM_001368331.1 |
| DM11446P1 | 0.01754481 | -3.7509837 |              |                |
| DM01801P2 | 0.02290005 | -1.2898496 | fib          | XM_624375.1    |
| DM14295P3 | 0.02436791 | 1.4559001  |              |                |
| DM03441P4 | 0.02947845 | -1.1798329 | LOC10007628  | XM_001507632.1 |
| DM12530P4 | 0.00102034 | -1.7101231 |              |                |
| DM08627P3 | 0.00630577 | 1.9272046  |              |                |
| DM09690P3 | 0.00244846 | -1.3794233 |              |                |
| DM12633P1 | 0.01921534 | 1.3500116  |              |                |
| DM11180P3 | 0.00164497 | 1.42656    |              |                |
| DM14829P3 | 0.0343997  | 1.3175192  |              |                |
| DM06451P1 | 0.01300398 | -1.191525  | EIF3G        | NM_001140944.1 |
| DM06371P3 | 0.02411592 | 1.9199845  | CYP306A1     | NM_001112751.1 |
| DM12584P1 | 0.03581544 | -1.2702287 |              |                |
| DM00373P3 | 0.00127843 | -1.2895691 | MANF         | XM_625020.2    |
| DM07432P4 | 0.01539145 | -1.2910812 | LOC758878    | XM_001182773.1 |
| DM02334P1 | 0.00265732 | -1.3556315 | Pros45       | NM_134603.1    |
| DM04051P3 | 3.62E-04   | -1.4360815 | LOC10016562  | XM_001949345.1 |
| DM00577P1 | 0.00748695 | -1.3178693 | Dmoj\GI1705  | XM_002001779.1 |
| DM00194P2 | 0.02195034 | -1.2889118 | LOC10016575  | XM_001949066.1 |
| DM07113P4 | 0.03648229 | 1.2300054  |              |                |
| DM12061P4 | 0.03022749 | -1.2523516 |              |                |
| DM13155P2 | 8.56E-04   | 1.9246937  |              |                |
| DM12367P4 | 0.00326101 | 1.364758   |              |                |
| DM08660P1 | 0.01466924 | -1.6380394 |              |                |



|           |            |            |              |                |
|-----------|------------|------------|--------------|----------------|
| DM07395P1 | 0.00666979 | 1.9239839  |              |                |
| DM12093P2 | 0.0169869  | -1.9641107 |              |                |
| DM12171P1 | 0.02264553 | 1.3963362  |              |                |
| DM03388P3 | 0.00714231 | -1.2568153 |              |                |
| DM12810P1 | 0.0040836  | -6.689043  |              |                |
| DM00627P3 | 9.03E-07   | 1.517806   | Dere\GG152C  | XM_001971830.1 |
| DM01760P1 | 0.00655191 | -1.2149156 | Ap1s2        | NM_001040591.1 |
| DM06990P1 | 0.03511822 | 5.01887    |              |                |
| DM02389P1 | 0.04086491 | 1.2780483  | LOC692984    | NM_001046821.1 |
| DM06753P4 | 3.85E-04   | 2.2040827  |              |                |
| DM12796P3 | 0.00258384 | 1.5685532  |              |                |
| DM01029P2 | 0.00314926 | -1.309498  | metap1d      | NM_001162303.1 |
| DM08207P4 | 0.02129539 | 1.4286716  |              |                |
| DM02409P1 | 0.00633523 | -1.3991362 | LOC10005666  | XM_001502591.2 |
| DM12355P1 | 0.00236838 | 3.2387326  |              |                |
| DM11208P3 | 6.27E-11   | 5.380822   |              |                |
| DM10086P3 | 0.04705113 | 1.947644   |              |                |
| DM02663P1 | 0.00543369 | 1.6889399  |              |                |
| DM06749P1 | 0.00306411 | 1.484157   |              |                |
| DM07697P4 | 0.0067886  | -1.3058398 |              |                |
| DM04485P1 | 0.01447719 | -1.2223295 |              |                |
| DM00393P2 | 0.00661579 | -1.3171026 | LOC10011724  | XM_001601493.1 |
| DM00680P3 | 0.00432886 | -1.2624846 | Dyak\GE2065  | XM_002090065.1 |
| DM06974P1 | 0.0118489  | -1.3351605 |              |                |
| DM02923P1 | 0.00407357 | -1.3404435 | LOC586206    | XM_785997.2    |
| DM11215P1 | 0.01496061 | -1.548806  |              |                |
| DM12427P4 | 0.03032271 | -1.6007357 |              |                |
| DM00340P3 | 7.47E-04   | -1.6175313 | PABN1        | NM_001044179.1 |
| DM12322P1 | 0.01298487 | 1.1812179  |              |                |
| DM09909P4 | 0.00739235 | 1.7007363  |              |                |
| DM12715P1 | 0.04313717 | -1.1795701 |              |                |
| DM08505P1 | 0.02539365 | 1.5352331  |              |                |
| DM06131P3 | 3.05E-04   | 1.5574948  | RHO          | XM_001651947.1 |
| DM07349P1 | 0.02349501 | -1.470423  |              |                |
| DM03784P1 | 0.0070744  | 1.7082521  |              |                |
| DM02861P3 | 0.0440031  | -1.4866673 | inx          | XM_001649705.1 |
| DM12848P1 | 0.02029426 | 1.2803547  |              |                |
| DM02971P1 | 0.01406039 | 1.5663296  | Dere\GG1205  | XM_001981390.1 |
| DM00314P2 | 0.00866829 | -1.4598815 | LOC408412    | XM_391959.3    |
| DM09107P3 | 0.00719071 | -1.3255624 |              |                |
| DM02775P1 | 0.00578434 | 1.7207797  | DNAJC28      | NM_001015977.1 |
| DM13032P2 | 0.03084045 | 1.3911769  |              |                |
| DM12707P2 | 0.00401904 | -1.4628003 |              |                |
| DM05949P2 | 0.00495372 | 1.8774776  | LOC658676    | XM_965040.1    |
| DM00351P1 | 0.03995756 | 1.1403202  | LOC10003114  | XM_001380432.1 |
| DM05011P1 | 0.02328174 | -1.2987435 |              |                |
| DM09593P2 | 0.00319568 | 1.2891809  |              |                |
| DM01395P3 | 0.0205626  | -1.2596569 | Dvir\GJ1256C | XM_002046305.1 |
| DM05966P2 | 0.00217459 | -1.5095931 |              |                |

|           |            |            |              |                |
|-----------|------------|------------|--------------|----------------|
| DM03030P1 | 5.29E-04   | -1.3395884 | LOC10021151  | XM_002155136.1 |
| DM08274P3 | 0.03187801 | 1.8244116  |              |                |
| DM13297P1 | 0.02037359 | 1.2196532  |              |                |
| DM01915P3 | 0.01116516 | -1.3551579 | AaeL_AAEL01  | XM_001654630.1 |
| DM14755P1 | 0.02742093 | -1.4942768 |              |                |
| DM13311P1 | 4.91E-04   | -1.3012115 |              |                |
| DM11164P1 | 6.36E-04   | -1.4571897 |              |                |
| DM01837P2 | 0.02309082 | -1.2954739 | LOC1001872   | XM_002129065.1 |
| DM00427P1 | 0.00300612 | -1.4114215 | BMP          | XM_001663364.1 |
| DM03496P1 | 0.00623824 | -1.399222  |              |                |
| DM01371P3 | 0.01050169 | -1.4316202 |              |                |
| DM11402P2 | 8.88E-04   | -1.2410042 |              |                |
| DM01476P2 | 0.02431467 | -3.0431411 | Dsim\GD1335  | XM_002083392.1 |
| DM00383P1 | 0.02732877 | -1.1764325 |              |                |
| DM14151P2 | 0.00380345 | -1.6165738 | Dvir\GJ17274 | XM_002051900.1 |
| DM02892P1 | 0.0072394  | 1.3325686  |              |                |
| DM03238P1 | 0.02449589 | 1.2573754  | AgaP_AGAP0   | XM_320237.3    |
| DM01339P1 | 8.85E-04   | 1.2972442  | SUOX         | NM_001029564.2 |
| DM04113P3 | 0.01347945 | -1.3702676 | RNF10        | NM_001096369.1 |
| DM00520P2 | 0.04683046 | -1.510898  | MAGOH        | NM_001034245.1 |
| DM05052P3 | 0.02789764 | -2.2353442 |              |                |
| DM08626P1 | 0.01769204 | 1.6115836  |              |                |
| DM00355P1 | 0.01033137 | 1.9657547  | LOC658676    | XM_965040.1    |
| DM12172P1 | 0.02902196 | -1.2455114 |              |                |
| DM06494P2 | 0.00578507 | -1.483735  |              |                |
| DM10649P1 | 0.02231441 | 1.5619738  |              |                |
| DM11824P1 | 0.00386641 | -1.5733345 | LOC1001682   | XM_001946431.1 |
| DM05711P3 | 0.00448805 | 1.4383067  |              |                |
| DM08046P3 | 0.00117144 | -1.4998686 |              |                |
| DM04275P2 | 0.04635821 | -1.3202202 |              |                |
| DM07283P4 | 0.03909112 | -1.2563123 |              |                |
| DM06195P1 | 0.01695627 | 1.4188008  | AgaP_AGAP0   | XM_315029.3    |
| DM13456P4 | 0.01767357 | 1.2440218  |              |                |
| DM05128P3 | 0.01095117 | -1.4499407 |              |                |
| DM00841P3 | 3.14E-04   | -1.2742457 | LOC579320    | XM_001189637.1 |
| DM00266P3 | 0.01423706 | -1.3619604 | Aurora-A     | XM_002179914.1 |
| DM08578P1 | 0.00390991 | 1.733755   |              |                |
| DM03449P3 | 0.01869059 | -1.4189757 |              |                |
| DM06985P3 | 0.00954416 | 1.3659743  |              |                |
| DM11603P2 | 0.00885847 | -1.490802  |              |                |
| DM00675P1 | 0.00872503 | -1.3773175 | Dsim\GD1975  | XM_002102209.1 |
| DM06954P2 | 1.95E-04   | 1.3425599  |              |                |
| DM02225P1 | 0.0085083  | 1.4169194  | LOC575126    | XM_775331.2    |
| DM00814P4 | 0.0015479  | -1.6338851 | Dgri\GH1235  | XM_001990918.1 |
| DM04845P1 | 1.73E-04   | -1.2646748 | LOC1001191   | XM_001602923.1 |
| DM04239P2 | 0.04173142 | -1.5001951 |              |                |
| DM09287P1 | 3.17E-06   | 2.7730072  |              |                |
| DM01744P1 | 0.0034163  | 1.2781893  | LOC552832    | XM_625207.1    |
| DM04411P1 | 0.00330011 | -1.2889805 | Dana\GF1194  | XM_001959602.1 |

|           |            |            |             |                |
|-----------|------------|------------|-------------|----------------|
| DM04300P2 | 0.03648844 | -1.3040165 |             |                |
| DM10695P1 | 0.03511835 | 1.2166786  |             |                |
| DM00830P3 | 6.16E-06   | -1.3859134 | GBE1        | NM_001094899.1 |
| DM12917P1 | 0.00256433 | -1.6428133 |             |                |
| DM13493P2 | 0.00437005 | 1.3132894  |             |                |
| DM04283P1 | 0.01609088 | 1.4297398  |             |                |
| DM12114P2 | 0.00196255 | 1.3171325  |             |                |
| DM04578P1 | 0.01961558 | -1.2604196 |             |                |
| DM06908P1 | 0.02410508 | 1.4394492  |             |                |
| DM11393P1 | 0.00509129 | -1.286418  |             |                |
| DM00091P1 | 8.19E-04   | -1.5247555 | LOC10012314 | XM_001607649.1 |
| DM08546P1 | 9.66E-04   | -1.2167097 |             |                |
| DM09735P2 | 0.00422448 | -1.7676157 |             |                |
| DM02204P1 | 0.01228595 | -1.1689938 | Ard1a       | NM_001135839.1 |
| DM07131P4 | 0.04720977 | -1.2197001 |             |                |
| DM02159P1 | 0.00264249 | -1.4140371 | AgaP_AGAP0  | XM_307929.4    |
| DM02704P1 | 0.00264773 | 1.6166126  |             |                |
| DM05604P1 | 0.01319866 | -1.2394794 |             |                |
| DM01842P2 | 1.44E-04   | 1.5946344  | RHO         | XM_001651947.1 |
| DM15214P1 | 6.46E-05   | 1.9785243  |             |                |
| DM11110P4 | 0.00705108 | -2.8559635 |             |                |
| DM03152P3 | 0.02234417 | -1.4252641 |             |                |
| DM07305P1 | 0.00975649 | -1.2131177 |             |                |
| DM01784P1 | 0.01289164 | -1.3591278 | Dsec\GM1775 | XM_002043825.1 |
| DM11954P3 | 0.00123369 | -1.4045682 |             |                |
| DM05567P1 | 0.00250013 | 2.1896822  |             |                |
| DM08906P1 | 0.02812484 | -1.250129  |             |                |
| DM02722P1 | 0.0049021  | -1.4693267 | Ola1        | XM_856197.1    |
| DM12503P2 | 0.0389447  | -1.3095162 |             |                |
| DM11166P3 | 0.01574519 | 1.2150936  |             |                |
| DM13149P1 | 0.04874433 | 1.367328   |             |                |
| DM02664P3 | 0.0063956  | -1.3617207 | B52         | NM_001170134.1 |
| DM11662P4 | 2.69E-04   | -1.589369  |             |                |
| DM01179P4 | 0.00413448 | 1.3254205  |             |                |
| DM00895P1 | 0.00698272 | -1.2353789 | Dgri\GH1940 | XM_001990498.1 |
| DM05376P1 | 8.20E-04   | 1.9505429  |             |                |
| DM02276P3 | 0.0212166  | -2.6780233 |             |                |
| DM01910P1 | 0.04420648 | -1.2011248 | AaeL_AAEL01 | XM_001650178.1 |
| DM00982P1 | 0.0463174  | 1.3079369  | LOC10020621 | XR_053778.1    |
| DM00883P1 | 0.00317117 | 1.760418   | LOC10006369 | XM_001494831.2 |
| DM00887P1 | 1.39E-05   | 1.4944582  | AaeL_AAEL01 | XM_001664052.1 |
| DM09640P3 | 8.08E-04   | 2.6627305  |             |                |
| DM06557P2 | 0.00484744 | 1.4226729  |             |                |
| DM12215P3 | 0.02445684 | -1.210009  |             |                |
| DM12364P4 | 0.00701294 | 1.5483348  |             |                |
| DM08518P1 | 0.00216932 | -1.496452  |             |                |
| DM10971P1 | 6.18E-04   | -1.8850259 |             |                |
| DM08541P1 | 0.00747153 | -1.90832   |             |                |
| DM06163P1 | 0.01330825 | 1.4794339  |             |                |

|           |            |            |              |                |
|-----------|------------|------------|--------------|----------------|
| DM04426P4 | 0.04916026 | -1.3144814 |              |                |
| DM01944P3 | 0.04422995 | -1.3039023 | Cct7         | NM_001142855.1 |
| DM09190P2 | 0.00397614 | 1.8255726  |              |                |
| DM13989P1 | 0.03662115 | 1.6249716  | AaeL_AAEL0C  | XM_001653715.1 |
| DM06442P2 | 0.00359328 | -1.5059842 |              |                |
| DM08616P1 | 0.00103294 | -1.5219642 |              |                |
| DM04255P1 | 0.00769687 | -1.3117142 |              |                |
| DM00965P3 | 0.00255931 | -1.624356  | LOC10011538  | XM_001599682.1 |
| DM02234P1 | 0.02489579 | -1.2605302 | tsr          | NM_001126170.2 |
| DM11726P3 | 0.00581917 | -1.4131949 |              |                |
| DM07497P2 | 0.025063   | 1.7354507  |              |                |
| DM13323P2 | 0.01102571 | 1.3924632  |              |                |
| DM01277P1 | 0.0110839  | -1.3945023 | AP3M1        | XM_546170.2    |
| DM01435P2 | 0.0245269  | -1.3456944 | LOC592289    | XM_791820.2    |
| DM09307P4 | 0.00876015 | -1.2977211 |              |                |
| DM00140P1 | 5.45E-04   | -1.2759066 | flil         | XR_015089.1    |
| DM03472P2 | 0.00401796 | -1.3041253 |              |                |
| DM14788P2 | 2.55E-04   | 1.5038527  |              |                |
| DM11127P3 | 7.60E-05   | -1.169675  |              |                |
| DM01541P2 | 1.69E-04   | -1.3377165 | AgaP_AGAP0C  | XM_318051.4    |
| DM00298P1 | 0.00144718 | -1.4715476 | IscW_ISCW0   | XM_002412481.1 |
| DM04206P3 | 0.0124106  | -1.4151419 | Dvir\GJ11156 | XM_002058700.1 |
| DM08238P1 | 0.02513362 | -2.237401  |              |                |
| DM07891P3 | 0.00657021 | 1.6198511  |              |                |
| DM07453P4 | 0.04814239 | 1.4884903  | THAPSDRAFT   | XM_002285900.1 |
| DM07683P1 | 8.57E-04   | 6.178445   |              |                |
| DM04324P3 | 0.01130629 | -1.3661282 |              |                |
| DM00768P3 | 0.00516399 | -1.4402072 | KLLA0F05005  | XM_455307.1    |
| DM01964P1 | 0.00434063 | -1.2479522 | Dere\GG2278  | XM_001979637.1 |
| DM06134P1 | 0.00276161 | -1.3118699 |              |                |
| DM00713P4 | 0.00878054 | -1.34618   | LOC1000184   | XM_001367196.1 |
| DM03904P2 | 0.04844128 | -1.7187792 |              |                |
| DM02174P3 | 0.03079482 | -1.209222  | Lypla1       | NM_001005699.1 |
| DM00382P2 | 0.0169914  | -1.1852032 | FZD7         | NM_001144091.1 |
| DM03841P2 | 9.49E-04   | -1.3225303 |              |                |
| DM03570P3 | 0.03111262 | -1.2428559 | Arcn1        | NM_201459.1    |
| DM05281P1 | 0.00123974 | -1.1727014 |              |                |
| DM00632P1 | 0.01875348 | 1.57989    | AaeL_AAEL0C  | XM_001659393.1 |
| DM13077P3 | 0.02351164 | -1.2680807 |              |                |
| DM06697P3 | 0.02742459 | -1.2356184 |              |                |
| DM00735P1 | 0.01780445 | -1.2535077 | AgaP_AGAP0C  | XM_317142.4    |
| DM12011P2 | 0.01918172 | -1.4506395 | Rab27a       | NM_001092394.1 |
| DM09150P3 | 0.04365094 | 1.6999485  |              |                |
| DM01742P2 | 1.28E-05   | -4.6936107 |              |                |
| DM13577P3 | 1.22E-04   | 1.4110458  | LOC10016222  | XM_001944913.1 |
| DM05352P1 | 5.72E-04   | -1.4430137 |              |                |
| DM10616P2 | 0.01580865 | -1.1937449 |              |                |
| DM14128P3 | 0.01285211 | -1.4360147 |              |                |
| DM08531P2 | 5.30E-04   | 2.1016858  |              |                |

|           |            |            |             |                |
|-----------|------------|------------|-------------|----------------|
| DM01588P1 | 0.03052541 | -1.1888222 | PSMD14      | NM_021526.2    |
| DM04327P1 | 0.02640492 | -1.1509635 |             |                |
| DM00776P2 | 0.00454214 | -1.2780925 |             |                |
| DM02752P4 | 0.00149843 | -1.7381152 | LOC10002665 | XM_001370341.1 |
| DM01536P1 | 0.00125672 | -1.2081708 | Mtmr12      | NM_001135516.1 |
| DM05070P4 | 0.01471373 | 1.3804455  |             |                |
| DM11615P1 | 0.00138125 | -1.4068466 |             |                |
| DM11972P3 | 0.01048813 | -1.425862  | LOC10020964 | XM_002154218.1 |
| DM13256P3 | 0.00300509 | -1.4217842 |             |                |
| DM02620P4 | 0.00330416 | 1.754331   |             |                |
| DM07638P3 | 0.03520491 | -2.9835012 |             |                |
| DM08373P1 | 0.02450559 | 2.7809708  |             |                |
| DM06149P3 | 0.04071172 | -1.3651345 | der-1       | XM_001901009.1 |
| DM09218P3 | 0.00135604 | 1.8684782  |             |                |
| DM00667P1 | 0.02360494 | -1.3731896 |             |                |
| DM04934P4 | 0.01189422 | -1.3300388 |             |                |
| DM07923P1 | 0.00880027 | 1.5967597  |             |                |
| DM13528P1 | 0.01313228 | 1.8064663  |             |                |
| DM08304P2 | 0.00810775 | -1.738297  |             |                |
| DM06808P1 | 0.00414012 | 1.7364994  |             |                |
| DM04911P1 | 0.02700709 | 1.3221797  | PB103351.00 | XM_666562.1    |
| DM06359P3 | 0.01008919 | 1.5846144  | IscW_ISCW02 | XM_002414028.1 |
| DM08081P2 | 0.01541153 | 2.5710351  |             |                |
| DM06311P3 | 1.90E-06   | 4.068534   |             |                |
| DM06450P1 | 0.00403825 | 1.569124   |             |                |
| DM10455P1 | 0.00728536 | 1.4910319  |             |                |
| DM03146P2 | 0.01230376 | -1.3138926 |             |                |
| DM00438P2 | 0.00572648 | -2.1254168 | LOC10016464 | XM_001948913.1 |
| DM10761P1 | 0.02133314 | -1.1599492 |             |                |
| DM02190P4 | 6.50E-04   | -1.3747876 | LOC10019027 | XM_002200552.1 |
| DM15323P1 | 0.01233774 | 1.4468395  |             |                |
| DM08692P2 | 0.04657602 | 1.3991735  | Dana\GF1789 | XM_001953665.1 |
| DM01344P1 | 0.01102757 | -1.4943931 | EXD2        | NM_001114406.1 |
| DM00818P2 | 0.00661213 | -1.2527615 | LOC659684   | XM_965969.1    |
| DM08671P3 | 1.12E-04   | -1.5483732 |             |                |
| DM13010P4 | 0.00708418 | -1.7398369 |             |                |
| DM14260P3 | 0.01696605 | 1.5363959  |             |                |
| DM03209P3 | 0.01736917 | -1.3378884 |             |                |
| DM11390P2 | 0.00769367 | -1.8583312 |             |                |
| DM01045P1 | 0.0159559  | -1.3389273 | Dmoj\GI2190 | XM_002003541.1 |
| DM08397P3 | 0.01470697 | 1.4362009  |             |                |
| DM00193P4 | 0.00682323 | -1.4675889 | Dana\GF2096 | XM_001963958.1 |
| DM01469P1 | 0.01929722 | -1.5491825 | LOC10019464 | NM_001139749.1 |
| DM00484P3 | 0.01522734 | -1.2248179 | RARS        | XM_001842243.1 |
| DM10717P3 | 0.00635982 | 1.5405802  |             |                |
| DM00452P3 | 5.99E-04   | -1.5309178 | LOC412308   | XM_395769.3    |
| DM04416P2 | 0.01005081 | 1.5817541  | LOC550801   | XM_623190.2    |
| DM02675P4 | 0.02719991 | -1.3496072 |             |                |
| DM01820P3 | 0.00137872 | 1.3758079  |             |                |

|           |            |            |              |                |
|-----------|------------|------------|--------------|----------------|
| DM10128P3 | 0.01005452 | -1.248389  |              |                |
| DM07160P1 | 0.02957587 | -1.2862102 |              |                |
| DM02251P3 | 1.26E-04   | -1.911321  |              |                |
| DM14241P3 | 0.00548346 | 2.327369   |              |                |
| DM00572P3 | 0.00119394 | -1.765478  | dus3l        | XM_425899.2    |
| DM02081P3 | 0.04641438 | -1.3891526 | IMPDH1       | XM_001501587.2 |
| DM04399P2 | 0.0043337  | 1.6048771  | LOC10006066  | XM_001492869.2 |
| DM05927P1 | 0.02932806 | 2.1778297  |              |                |
| DM00246P1 | 4.01E-05   | -2.2360036 | TH           | NM_012740.3    |
| DM05429P1 | 0.01685854 | -1.8503892 |              |                |
| DM07495P1 | 0.00226008 | -2.075642  |              |                |
| DM02525P1 | 0.00608291 | -2.7090793 | Dper\GL1780  | XM_002029022.1 |
| DM08533P1 | 0.00201512 | -1.463394  |              |                |
| DM03620P2 | 0.0158874  | -1.791366  |              |                |
| DM00576P2 | 0.02386494 | -1.399922  | Dpse\GA1883  | XM_001358673.2 |
| DM05964P2 | 0.01065731 | 2.0390089  |              |                |
| DM03070P2 | 0.00795447 | -1.3925884 | BRAFLDRAFT_  | XM_002607778.1 |
| DM06631P1 | 0.02242525 | 1.2832732  |              |                |
| DM01006P4 | 0.00599746 | -1.2819809 | Dgri\GH2454  | XM_001991997.1 |
| DM01001P4 | 0.04060762 | -1.4095753 | Dana\GF2077  | XM_001964287.1 |
| DM09470P1 | 6.23E-04   | -1.286919  |              |                |
| DM08401P1 | 0.00582583 | 2.110674   |              |                |
| DM08066P2 | 0.00236541 | 1.3892819  |              |                |
| DM01475P1 | 9.34E-06   | 3.6587646  |              |                |
| DM01094P1 | 0.00492553 | 1.4363302  | TRIADDRAFT_  | XM_002117079.1 |
| DM04941P2 | 9.34E-07   | -7.8798337 |              |                |
| DM10192P1 | 0.04647194 | -1.2925293 |              |                |
| DM03977P2 | 0.00207465 | -1.7011019 | TTC30B       | NM_001127607.1 |
| DM02794P2 | 4.54E-04   | -1.4484206 | Dper\GL1380  | XM_002020059.1 |
| DM12192P2 | 0.02368185 | -1.2133236 |              |                |
| DM00539P2 | 0.02575317 | -1.1978865 | LOC612762    | XM_850950.1    |
| DM03574P2 | 0.00379972 | -1.4055393 | LOC661534    | XM_967685.2    |
| DM01040P2 | 0.02736417 | -1.2371334 | Dmoj\GI1534  | XM_002009385.1 |
| DM02756P2 | 4.23E-06   | -9.195115  |              |                |
| DM11102P2 | 0.03421287 | -1.2994268 |              |                |
| DM01893P1 | 0.00281622 | -1.7993982 | FG00571.1    | XM_380747.1    |
| DM09360P2 | 0.00161897 | -1.3168238 |              |                |
| DM00353P1 | 0.00673176 | -1.4062742 | cct5         | XM_393315.3    |
| DM03457P1 | 0.04777066 | -1.2774361 |              |                |
| DM08105P2 | 0.02259934 | 2.1353204  |              |                |
| DM02155P2 | 0.00667324 | -1.2752473 | LOC1001160   | XM_001600561.1 |
| DM07303P2 | 0.03902953 | 1.6226777  |              |                |
| DM08542P4 | 0.0077158  | -1.5107534 |              |                |
| DM00312P2 | 0.01684608 | -1.2398379 | LOC1001140   | XM_001601345.1 |
| DM01347P1 | 0.00434693 | 1.5135092  | LOC594823    | XM_794247.2    |
| DM10908P1 | 0.00187475 | -1.3608106 |              |                |
| DM06314P1 | 0.0067116  | 1.9484427  |              |                |
| DM02584P1 | 0.02380464 | -2.140852  |              |                |
| DM02570P3 | 5.17E-05   | 2.271027   | Dvir\GJ20849 | XM_002049231.1 |

|           |            |            |              |                |
|-----------|------------|------------|--------------|----------------|
| DM08974P1 | 0.00408176 | -1.3775543 |              |                |
| DM01161P3 | 0.00104837 | -1.2507819 | osgep        | NM_001016112.2 |
| DM06128P2 | 0.01044679 | 1.3517995  | LOC10011437  | XM_001607754.1 |
| DM12183P2 | 1.84E-04   | 1.8651845  |              |                |
| DM12531P2 | 0.00636103 | 1.6071223  |              |                |
| DM10376P2 | 0.0067677  | 2.7246015  |              |                |
| DM11886P1 | 0.01285876 | 1.5238116  |              |                |
| DM04430P2 | 0.00517757 | -1.4878845 |              |                |
| DM12352P1 | 0.00327647 | -1.3587252 |              |                |
| DM09496P1 | 0.02378576 | 1.425047   |              |                |
| DM02299P2 | 0.01758662 | -1.574591  | Dmoj\GI1938  | XM_002004789.1 |
| DM00074P4 | 0.04601317 | -1.2359343 | Tbp-1        | NM_079740.3    |
| DM12721P3 | 0.01701117 | -1.9575338 |              |                |
| DM00953P1 | 0.02134373 | -1.2039627 | CYB5R3       | XM_780154.2    |
| DM05895P1 | 1.02E-06   | 5.5948267  |              |                |
| DM12179P3 | 0.02746965 | 1.8595015  | LOC657243    | XM_963712.2    |
| DM01224P2 | 0.00996188 | -1.1646001 | Dsim\GD2345  | XM_002078442.1 |
| DM05224P3 | 0.00145529 | 2.9207547  |              |                |
| DM00963P2 | 0.00620293 | -1.2245393 | vib          | XM_624561.2    |
| DM10534P3 | 3.36E-04   | 1.303402   |              |                |
| DM04272P3 | 0.00154311 | -1.3355929 |              |                |
| DM00412P2 | 0.01847191 | -1.3976966 | nop5         | XM_395309.3    |
| DM00302P1 | 0.0047207  | -1.2397517 | LOC662115    | XM_968232.1    |
| DM11099P3 | 0.01400656 | -1.5233331 | LOC10023205  | XM_002186808.1 |
| DM03683P1 | 0.03409534 | -1.2887424 | Pros54       | XM_393112.3    |
| DM06183P1 | 0.00214897 | -1.3476866 | LOC578921    | XM_001184577.1 |
| DM11358P3 | 0.01082412 | -1.208131  | LOC655443    | XM_961987.1    |
| DM00007P1 | 0.01160821 | -1.2671636 | LOC551386    | XM_623781.2    |
| DM07337P1 | 0.00367942 | 1.6614673  |              |                |
| DM10121P1 | 0.01874985 | -1.3040305 |              |                |
| DM02807P4 | 6.15E-04   | -1.500665  | LOC579937    | XM_780026.2    |
| DM08394P1 | 1.24E-04   | 2.21997    |              |                |
| DM02042P2 | 0.01437581 | -3.5417778 | PHATRDRAFT   | XM_002183085.1 |
| DM12332P3 | 0.00762076 | 2.2765188  |              |                |
| DM00292P2 | 6.75E-04   | -1.3822654 | BRAFLDRAFT   | XM_002608112.1 |
| DM11367P4 | 0.00771356 | -1.3915104 |              |                |
| DM12833P2 | 0.00872118 | 1.3531249  |              |                |
| DM01794P1 | 0.00419991 | -1.326171  | Dwil\GK16370 | XM_002067312.1 |
| DM02421P3 | 0.02917538 | -1.3636276 | LOC10019064  | XM_002200394.1 |
| DM04957P2 | 0.00440269 | 1.4200221  | TRIADDRAFT   | XM_002108033.1 |
| DM10780P1 | 0.00232337 | 1.4835852  |              |                |
| DM08981P2 | 0.0034587  | -1.9402546 |              |                |
| DM08350P1 | 4.62E-04   | 4.679815   |              |                |
| DM10763P1 | 0.00179777 | 1.7185748  |              |                |
| DM05130P2 | 0.00917656 | 1.2625183  |              |                |
| DM06608P1 | 0.01775801 | -1.2485099 |              |                |
| DM01011P1 | 4.50E-04   | -1.4858453 |              |                |
| DM01558P3 | 0.01515576 | -1.3047302 | PHB          | XM_001662336.1 |
| DM03705P1 | 0.00954792 | -1.3554298 | glyr1        | NM_001030494.1 |

|           |            |            |              |                |
|-----------|------------|------------|--------------|----------------|
| DM07284P1 | 0.00388699 | -2.6743326 |              |                |
| DM03140P1 | 0.01551065 | -1.4202943 |              |                |
| DM04391P3 | 0.0130273  | -1.4142315 | DwiI\GK2301  | XM_002074683.1 |
| DM12349P1 | 0.01663044 | -1.2811614 |              |                |
| DM03747P3 | 0.01390675 | -1.7861822 |              |                |
| DM10101P4 | 0.02877761 | 1.5016142  |              |                |
| DM11291P3 | 0.00622381 | -1.9531116 |              |                |
| DM14797P1 | 0.00201808 | -1.7121397 |              |                |
| DM09714P2 | 0.00552511 | -1.4294417 |              |                |
| DM06122P3 | 0.01465086 | 1.3203294  |              |                |
| DM06740P2 | 0.02959719 | 1.1197487  |              |                |
| DM06826P2 | 0.0065276  | -1.627335  |              |                |
| DM09378P2 | 4.05E-05   | -1.4001633 |              |                |
| DM11692P2 | 0.0093262  | -29.834429 |              |                |
| DM01622P4 | 0.0072735  | -1.3617984 | Dvir\GJ22263 | XM_002050594.1 |
| DM07636P2 | 0.01598219 | -1.916322  |              |                |
| DM08490P1 | 0.02732352 | 1.8109506  |              |                |
| DM11581P4 | 0.00486735 | -1.3723459 |              |                |
| DM02393P2 | 0.01647893 | -1.3133527 | hsp70        | XM_001900162.1 |
| DM01077P3 | 0.00398045 | -1.2906876 |              |                |
| DM01799P1 | 8.09E-04   | 1.5068575  | TRIADDRAFT_  | XM_002108789.1 |
| DM02030P2 | 0.00624904 | -1.2498688 | LOC692802    | NM_001046649.1 |
| DM01982P1 | 0.01154367 | 1.3046662  | NEMVEDRAFT   | XM_001634353.1 |
| DM09472P3 | 0.00344099 | -1.3593627 |              |                |
| DM12402P3 | 0.02702132 | 1.3701711  |              |                |
| DM02283P1 | 5.50E-06   | 1.873909   | IscW_ISCW0`  | XM_002416102.1 |
| DM05321P2 | 8.75E-06   | 2.042937   |              |                |
| DM08043P3 | 0.00524781 | -1.749926  |              |                |
| DM01919P3 | 7.39E-04   | -1.5085225 | LOC578192    | XM_001190853.1 |
| DM04821P3 | 0.02005977 | -1.2414098 | IscW_ISCW0(  | XM_002405702.1 |
| DM00130P2 | 0.0060708  | -1.6371886 | Dvir\GJ23199 | XM_002053675.1 |
| DM00268P2 | 0.00267925 | -1.3884822 | LOC1001646{  | XM_001946418.1 |
| DM02493P3 | 0.02878249 | -1.286177  | lwr          | XM_623680.2    |
| DM05175P2 | 0.00355409 | -1.4883262 |              |                |
| DM02809P2 | 0.01071166 | -1.3991021 | LOC1001163`  | XM_001608252.1 |
| DM02533P1 | 0.04103374 | 1.6327537  | Mhc          | NM_001169521.1 |
| DM03998P3 | 0.00170703 | 2.3720815  |              |                |
| DM03029P4 | 0.0353826  | -4.067462  |              |                |
| DM11710P3 | 0.01672988 | -1.7753773 |              |                |
| DM14812P1 | 0.0175557  | 1.6152093  |              |                |
| DM04438P3 | 0.02563204 | -1.9120626 | PICST_68241  | XM_001386193.1 |
| DM03055P2 | 6.82E-04   | 1.4029984  |              |                |
| DM11085P1 | 0.00487331 | -1.9625766 |              |                |
| DM02767P1 | 0.04127627 | -1.4155275 | PSMD1        | NM_001092985.1 |
| DM01370P1 | 0.00753253 | -1.3003566 | AaeL_AAEL01  | XM_001650137.1 |
| DM11727P1 | 0.00565141 | -1.2389246 | sn           | XM_396175.3    |
| DM05687P2 | 0.00881603 | -15.748243 |              |                |
| DM11580P1 | 0.01744841 | 1.8469728  |              |                |
| DM03484P1 | 0.00192323 | -1.5301499 |              |                |



|           |            |            |              |                |
|-----------|------------|------------|--------------|----------------|
| DM05733P1 | 0.00107956 | 1.2706611  | LOC574544    | XM_001177660.1 |
| DM04837P3 | 0.00165599 | 1.2087762  | LOC10011386  | XM_001602665.1 |
| DM01052P3 | 0.01270728 | -1.2811866 | tkv          | XM_391989.3    |
| DM14867P1 | 0.00254455 | -1.6382643 |              |                |
| DM06042P3 | 0.00849071 | -1.6671554 | LOC10018750  | XM_002125820.1 |
| DM08957P3 | 0.00371119 | 1.4608456  |              |                |
| DM06546P3 | 0.01853922 | 1.3301709  |              |                |
| DM02366P3 | 0.01218082 | -1.5687511 | IscW_ISCW0   | XM_002408330.1 |
| DM02313P3 | 0.01509191 | 1.2909361  | Dwil\GK1747  | XM_002062268.1 |
| DM10284P1 | 1.06E-05   | -1.8256786 |              |                |
| DM06446P2 | 2.07E-05   | -1.537165  | LOC10021037  | XM_002166106.1 |
| DM00379P4 | 0.02755706 | 1.5293738  | LOC409759    | XM_393252.3    |
| DM09694P3 | 0.01403406 | -1.8189831 |              |                |
| DM09310P1 | 0.00178022 | -3.0986753 |              |                |
| DM11042P1 | 0.02414635 | 1.4661702  |              |                |
| DM02750P2 | 0.00767005 | 1.3305851  |              |                |
| DM10537P2 | 0.00977796 | 1.3574975  |              |                |
| DM02535P1 | 1.70E-09   | 3.0402067  |              |                |
| DM12125P1 | 2.29E-04   | -1.8045621 |              |                |
| DM03157P2 | 0.02031313 | 1.2427396  | Dwil\GK2506  | XM_002071549.1 |
| DM11670P2 | 0.01014365 | -1.914682  |              |                |
| DM00968P2 | 0.00498089 | 2.0489323  | Dsec\GM1275  | XM_002037109.1 |
| DM04916P2 | 0.00280988 | -1.4611118 |              |                |
| DM11236P2 | 0.02163292 | 1.9384344  | Dsec\GM1056  | XM_002038503.1 |
| DM04781P3 | 0.00172166 | 1.5835173  |              |                |
| DM07669P1 | 0.00156312 | 1.5587491  |              |                |
| DM12718P4 | 0.01233911 | 1.6657772  |              |                |
| DM13531P1 | 0.02979738 | -1.2577055 |              |                |
| DM02561P3 | 0.00171069 | -1.4383124 | LOC414042    | XM_397478.3    |
| DM04334P4 | 0.00690377 | -1.1988568 |              |                |
| DM07245P2 | 0.00267795 | 2.8492188  |              |                |
| DM10641P2 | 0.01013041 | -1.5049222 |              |                |
| DM08638P2 | 0.00619973 | 1.3752185  |              |                |
| DM12197P3 | 0.01347561 | -1.3447176 |              |                |
| DM03653P3 | 0.00727483 | -1.4777972 | Dvir\GJ17567 | XM_002052452.1 |
| DM08172P1 | 0.02844482 | -1.2638755 |              |                |
| DM04792P1 | 0.01018068 | 1.924187   |              |                |
| DM05993P1 | 0.00999797 | -1.388503  | Kpol_1052p2  | XM_001644488.1 |
| DM06975P4 | 3.92E-05   | -2.08512   |              |                |
| DM00022P3 | 0.0034188  | -1.5360148 | tbb-4        | NM_077184.3    |
| DM00334P3 | 0.00215373 | -1.297851  | Dwil\GK1718  | XM_002061740.1 |
| DM12716P1 | 0.01733834 | 1.6755642  |              |                |
| DM12682P1 | 0.01813184 | 1.2309105  |              |                |
| DM14739P3 | 0.01326531 | -1.2077776 |              |                |
| DM11475P2 | 0.00486367 | -1.4169875 |              |                |
| DM09311P2 | 0.00243929 | 1.4496726  |              |                |
| DM00025P2 | 0.00730096 | -1.3539841 | LOC10020139  | XM_002162742.1 |
| DM02760P1 | 0.00634132 | -1.1712872 | LOC10016867  | XM_001945818.1 |
| DM02984P3 | 4.10E-07   | 3.5808704  |              |                |

|           |            |            |             |                |
|-----------|------------|------------|-------------|----------------|
| DM06396P1 | 0.00618051 | -1.3324326 |             |                |
| DM05340P3 | 0.00461064 | -1.5205618 |             |                |
| DM10773P1 | 0.00494869 | 1.5549436  |             |                |
| DM15398P1 | 0.0080795  | 1.4771882  |             |                |
| DM01446P1 | 0.00186162 | 3.096769   |             |                |
| DM02491P3 | 0.00141615 | 1.2467006  |             |                |
| DM09823P1 | 1.52E-04   | -1.3723774 |             |                |
| DM11863P4 | 0.01236584 | -1.8373369 |             |                |
| DM12249P2 | 0.00296414 | -1.7120101 |             |                |
| DM12454P4 | 0.00997119 | 1.634826   |             |                |
| DM06630P1 | 3.25E-04   | -1.9760731 |             |                |
| DM09068P1 | 0.01988845 | 1.3775971  |             |                |
| DM09777P3 | 0.01899206 | -1.398157  |             |                |
| DM03535P3 | 3.84E-04   | -1.6832722 | LOC1000137  | XM_001363834.1 |
| DM06855P3 | 0.0067931  | 1.2931087  |             |                |
| DM01157P1 | 0.00986366 | 1.8003316  |             |                |
| DM05586P3 | 0.01673514 | -1.2261366 |             |                |
| DM12592P3 | 0.03502458 | -1.5210562 |             |                |
| DM01617P3 | 0.00730229 | 2.5157752  | SNOG_05978  | XM_001796314.1 |
| DM03361P1 | 0.03509669 | -1.2625995 | THOC4       | NM_001162183.1 |
| DM07292P1 | 0.00870753 | 1.701668   |             |                |
| DM02513P3 | 0.00433082 | -1.3385007 | DCP1B       | NM_001134200.1 |
| DM05901P1 | 0.02746922 | 1.3938797  | AgaP_AGAP0  | XM_314158.4    |
| DM00835P2 | 0.02894397 | -1.4144236 | Dwil\GK1756 | XM_002062442.1 |
| DM01864P2 | 0.00261983 | -1.4270123 | TRIADDRAFT_ | XM_002114628.1 |
| DM00170P1 | 0.00416562 | -1.4036942 | PSMC4       | XM_001652594.1 |
| DM08432P2 | 0.00287828 | 1.7491331  |             |                |
| DM01104P1 | 0.01453577 | 1.4474046  |             |                |
| DM01268P2 | 0.04945923 | -2.1153076 |             |                |
| DM02555P3 | 6.34E-04   | -1.5001011 | LOC410040   | XM_393525.3    |
| DM07929P1 | 7.67E-05   | 1.8612905  |             |                |
| DM01633P2 | 6.02E-04   | -1.3557504 | Dwil\GK1274 | XM_002074169.1 |
| DM09580P2 | 0.0086034  | -2.54383   |             |                |
| DM03494P1 | 0.01348341 | 1.4180539  | LOC592108   | XM_791648.1    |
| DM06853P2 | 0.03410621 | 1.4184923  |             |                |
| DM07428P3 | 0.01628551 | 2.026289   | TTHERM_000  | XM_001014892.2 |
| DM02845P3 | 8.52E-04   | -1.5467621 |             |                |
| DM06445P1 | 0.00149343 | -2.9998217 |             |                |
| DM00906P2 | 0.00723497 | -1.3101119 | LOC1000230  | XM_001369930.1 |
| DM08476P3 | 0.00953527 | 1.2810681  |             |                |
| DM12429P1 | 0.01220785 | -1.2794166 |             |                |
| DM11986P3 | 3.07E-04   | -1.4958037 | Canx        | XM_001150972.1 |
| DM05762P1 | 0.00450722 | -1.4261941 |             |                |
| DM02055P3 | 0.00128937 | 1.4881774  | LOC1001683  | XM_001948336.1 |
| DM03022P1 | 0.00500138 | 1.7609416  | TGM4        | NM_001130909.1 |
| DM10397P1 | 0.02261467 | 1.8748783  |             |                |
| DM09595P3 | 0.01977068 | -1.3041229 |             |                |
| DM01145P3 | 0.01064814 | -1.4213347 | LOC1002082  | XM_002165850.1 |
| DM04486P2 | 0.00340451 | 1.2262242  |             |                |

|           |            |            |              |                |
|-----------|------------|------------|--------------|----------------|
| DM00560P4 | 0.00378113 | -1.2626946 | Dvir\GJ19771 | XM_002058859.1 |
| DM02831P3 | 1.94E-04   | 2.3761384  | LOC789799    | XM_001256447.2 |
| DM03347P1 | 0.00807516 | 1.4112426  |              |                |
| DM07394P1 | 0.01783365 | 1.3664378  |              |                |
| DM01990P3 | 3.58E-04   | -1.3894106 | Dper\GL1761  | XM_002018218.1 |
| DM01165P1 | 0.00580773 | -1.5451936 |              |                |
| DM13483P1 | 4.51E-04   | 1.3037952  |              |                |
| DM07355P3 | 0.00122921 | -1.2716515 |              |                |
| DM12306P2 | 1.50E-04   | -1.7520344 |              |                |
| DM11316P2 | 3.89E-04   | 3.2580879  |              |                |
| DM06958P2 | 0.0236221  | -2.2650065 |              |                |
| DM04295P1 | 0.0010403  | 7.75871    |              |                |
| DM06544P1 | 0.02227005 | -1.2553388 |              |                |
| DM06289P3 | 0.01076952 | -1.2473621 | LOC10017052  | NM_001130305.1 |
| DM00871P2 | 0.03541947 | -1.2374448 | fdh          | XM_393266.2    |
| DM03011P2 | 5.41E-05   | 1.5294459  | YAL10F05962  | XM_505057.1    |
| DM00107P2 | 0.01365142 | -1.3521649 | LOC10023176  | XM_002198962.1 |
| DM09162P2 | 0.00961991 | 1.4044522  |              |                |
| DM09729P3 | 0.01982063 | -1.453624  |              |                |
| DM12622P1 | 0.03749003 | 1.2327133  |              |                |
| DM01854P2 | 0.00101782 | -1.7717109 | tbb-4        | NM_077184.3    |
| DM10493P1 | 0.00175963 | -3.5106688 |              |                |
| DM08685P4 | 0.00139094 | 1.531029   |              |                |
| DM12476P3 | 0.01128342 | 1.6216798  |              |                |
| DM01218P1 | 0.00995615 | -1.4796627 |              |                |
| DM10756P3 | 0.04773648 | 1.1884931  |              |                |
| DM11720P3 | 0.00310397 | -1.3953677 | IF2          | XM_001659813.1 |
| DM06712P2 | 0.00296733 | 1.4529638  |              |                |
| DM07057P1 | 0.01228895 | -1.2553749 |              |                |
| DM03680P3 | 3.66E-06   | 1.3665518  | LOC10021454  | XM_002159411.1 |
| DM08407P1 | 6.24E-04   | 3.9475336  |              |                |
| DM04705P1 | 0.00968826 | 1.6047554  |              |                |
| DM04417P1 | 0.01586525 | -1.3577254 | CG8258       | NM_136574.2    |
| DM05262P1 | 0.01455583 | -2.0296683 |              |                |
| DM10272P3 | 0.03662017 | 1.4213781  |              |                |
| DM12225P1 | 0.02237151 | -1.3004777 |              |                |
| DM09306P1 | 0.0017738  | -1.3465117 |              |                |
| DM09670P1 | 4.29E-04   | 2.6516113  |              |                |
| DM04465P4 | 8.91E-04   | 1.3242831  |              |                |
| DM06542P1 | 0.00333711 | 1.4716066  |              |                |
| DM10472P3 | 0.0251168  | 1.4923266  |              |                |
| DM12730P3 | 2.57E-04   | 1.3353739  |              |                |
| DM04301P3 | 0.00175517 | -2.2452335 |              |                |
| DM02494P1 | 0.00669227 | 1.4902573  | PTPRA        | NM_001127950.1 |
| DM00164P1 | 0.00636951 | -1.4115087 | LOC10011534  | XM_001600045.1 |
| DM00279P3 | 0.02604919 | -1.2288952 | Os03g08106C  | NM_001058200.1 |
| DM03587P1 | 0.02890206 | -1.3178058 |              |                |
| DM04058P1 | 0.00154057 | 5.918274   |              |                |
| DM13364P1 | 0.01322536 | 1.3585833  |              |                |

|           |            |            |              |                |
|-----------|------------|------------|--------------|----------------|
| DM00701P1 | 0.01063269 | -1.3800669 | SND1         | XM_532436.2    |
| DM11479P1 | 0.00588664 | -2.2063024 |              |                |
| DM06677P2 | 4.90E-04   | 1.5080212  |              |                |
| DM05364P2 | 0.02861452 | 1.5396724  |              |                |
| DM12623P2 | 0.02048508 | -1.3632417 |              |                |
| DM01870P2 | 0.00112606 | -1.4675035 | Dwil\GK1590  | XM_002063835.1 |
| DM05545P2 | 0.02588585 | -1.5841334 |              |                |
| DM05203P1 | 0.00204873 | -1.3262385 | LOC1001240   | XM_001607822.1 |
| DM11239P2 | 0.00265511 | -1.4015462 |              |                |
| DM05214P1 | 0.03978384 | -1.4644701 | Imn          | XM_001851435.1 |
| DM04610P2 | 0.02659745 | 1.2379783  |              |                |
| DM11985P3 | 0.00843805 | -1.445276  |              |                |
| DM03634P3 | 0.00276143 | -1.54192   | BRAFLDRAFT   | XM_002613798.1 |
| DM09000P2 | 0.02872402 | -1.3340379 | LOC1001772   | XM_002131598.1 |
| DM02023P2 | 0.00107863 | -1.2061249 |              |                |
| DM02968P2 | 0.04154164 | -1.2470628 | Dsec\GM204C  | XM_002033412.1 |
| DM00075P1 | 0.00151779 | -1.3666525 | RHOT2        | NM_001080866.1 |
| DM01068P1 | 0.01174196 | -1.4015926 | CG8258       | NM_136574.2    |
| DM09799P3 | 0.00711718 | 1.8937986  |              |                |
| DM14537P2 | 0.02211404 | 1.2187682  |              |                |
| DM09952P3 | 0.00351265 | -1.3487312 |              |                |
| DM01206P1 | 0.0044503  | -1.2332741 | Pdcl3        | XM_858229.1    |
| DM03684P1 | 0.02287342 | -1.3663862 |              |                |
| DM06719P2 | 0.02111931 | 1.2646086  |              |                |
| DM05838P1 | 7.88E-04   | -4.5946593 |              |                |
| DM06833P1 | 1.87E-06   | -2.4367948 |              |                |
| DM06032P1 | 0.00506981 | -2.9731636 |              |                |
| DM05777P3 | 0.01182693 | -1.2756326 |              |                |
| DM00220P1 | 0.00354649 | -1.1352121 | cbl          | XM_605809.4    |
| DM07960P2 | 0.04398578 | 1.3790957  |              |                |
| DM07234P2 | 0.0138632  | -4.353531  |              |                |
| DM05765P3 | 0.00948034 | -1.3789983 |              |                |
| DM11008P1 | 0.01444872 | 1.1473379  |              |                |
| DM06454P4 | 0.0180371  | -1.2488428 |              |                |
| DM01323P3 | 0.03070165 | -1.2420061 | LOC1001907   | XM_002190098.1 |
| DM04232P3 | 0.018053   | -1.3751253 |              |                |
| DM14869P1 | 0.00238645 | 1.4240999  |              |                |
| DM10498P3 | 0.00406568 | -2.300277  |              |                |
| DM15074P1 | 0.01833504 | 1.2091843  |              |                |
| DM09897P3 | 0.01086777 | 1.880615   |              |                |
| DM03641P1 | 0.04403359 | 1.4480449  |              |                |
| DM12185P3 | 0.02962956 | -1.5530508 |              |                |
| DM06110P2 | 0.0154296  | -2.3990133 |              |                |
| DM10914P3 | 0.00296472 | 2.0375364  |              |                |
| DM09166P2 | 0.01081698 | -1.4517893 |              |                |
| DM02848P2 | 0.04761765 | -1.1788968 | Dvir\GJ13603 | XM_002047706.1 |
| DM03581P2 | 0.01330451 | -1.245668  |              |                |
| DM11994P1 | 0.01114985 | 1.2154987  |              |                |
| DM02247P2 | 0.01192425 | -1.6689509 | Dana\GF1416  | XM_001962943.1 |

|           |            |            |             |                |
|-----------|------------|------------|-------------|----------------|
| DM01316P3 | 0.00618198 | -1.4930078 | LOC10022396 | XM_002199120.1 |
| DM07760P4 | 0.01365099 | -1.32874   |             |                |
| DM01796P2 | 0.03320245 | 1.3215815  | RHO         | XM_001651947.1 |
| DM07273P2 | 7.77E-05   | 1.8640025  |             |                |
| DM06005P2 | 8.31E-05   | 1.6460793  |             |                |
| DM04419P2 | 0.00908791 | 1.2273984  | gdh         | NM_170101.2    |
| DM02047P1 | 2.70E-04   | 1.2846155  |             |                |
| DM08658P1 | 0.02261868 | -1.2232376 |             |                |
| DM06306P1 | 0.01407722 | 1.378937   |             |                |
| DM00432P1 | 3.71E-04   | -1.3691803 | glyg        | NM_001139830.1 |
| DM12878P1 | 5.09E-06   | 1.3923161  | SQRDL       | NM_001086609.1 |
| DM01367P3 | 0.00238589 | 1.2643584  | Dmoj\GI1918 | XM_002005214.1 |
| DM07810P3 | 0.02649283 | -1.3366297 |             |                |
| DM12632P1 | 0.04027791 | -1.3982767 |             |                |
| DM05931P3 | 0.01033358 | 1.893062   |             |                |
| DM13104P1 | 0.00799333 | 2.0864787  |             |                |
| DM06861P1 | 0.04596079 | 1.2354659  |             |                |
| DM06968P1 | 0.00601108 | -1.4871739 |             |                |
| DM14090P1 | 1.06E-04   | -1.9853314 |             |                |
| DM09509P4 | 0.03488965 | -1.2075394 |             |                |
| DM05030P3 | 0.03649491 | -1.167809  |             |                |
| DM08359P1 | 0.0046697  | 2.009681   |             |                |
| DM03651P1 | 0.00955904 | 1.4883109  | MGC165715   | NM_001102129.1 |
| DM11721P3 | 1.28E-04   | 3.1788921  |             |                |
| DM03329P1 | 0.04818441 | -1.3740612 |             |                |
| DM07691P1 | 0.01295199 | -1.9404283 |             |                |
| DM03889P1 | 0.00576045 | -1.5137794 |             |                |
| DM15344P1 | 0.0218494  | -1.7361114 |             |                |
| DM04808P4 | 9.21E-04   | -1.7133235 | H2AFV       | NM_001092643.1 |
| DM02443P2 | 0.00134381 | 1.5138042  | aldh1a1     | NM_001087771.1 |
| DM10478P1 | 0.00478828 | 1.335223   |             |                |
| DM00337P1 | 0.0028484  | -1.315233  | BRAFLDRAFT_ | XM_002608112.1 |
| DM01800P2 | 0.00153174 | -1.356581  | Dere\GG2502 | XM_001980943.1 |
| DM06932P3 | 0.00561411 | 1.8775462  |             |                |
| DM06885P3 | 0.00644371 | -3.174557  |             |                |
| DM02097P3 | 0.02969982 | -1.2409447 | zgc: 123298 | NM_001037560.1 |
| DM05097P1 | 0.01319736 | -1.505781  |             |                |
| DM12438P3 | 0.04666682 | 1.5100496  |             |                |
| DM07045P1 | 0.00502603 | 1.5038326  |             |                |
| DM01531P4 | 0.04945028 | -1.3335438 |             |                |
| DM01907P3 | 0.00139701 | -1.4773688 | Dwil\GK1721 | XM_002075252.1 |
| DM01263P3 | 4.97E-04   | -1.2242116 | Dana\GF2263 | XM_001965663.1 |
| DM03385P2 | 0.00300896 | -1.382492  | LOC656679   | XM_963188.2    |
| DM11024P1 | 0.01817406 | -1.2150565 |             |                |
| DM06166P2 | 0.0014275  | 1.5444314  |             |                |
| DM12118P2 | 0.00330353 | 1.7596314  | Dere\GG1725 | XM_001980589.1 |
| DM01009P3 | 0.00257266 | -1.3156587 | MettI2      | NM_172567.3    |
| DM02654P2 | 0.04201514 | -1.3658004 | BRAFLDRAFT_ | XM_002595646.1 |
| DM00151P3 | 2.07E-04   | -1.3256345 | Wee2        | NM_001105558.1 |

|           |            |            |                             |
|-----------|------------|------------|-----------------------------|
| DM07244P3 | 0.00671538 | -1.2333689 |                             |
| DM03930P3 | 0.00167525 | 1.6473776  |                             |
| DM04428P4 | 0.01927778 | -1.2568175 | Dper\GL2107 XM_002023180.1  |
| DM01072P2 | 0.00111118 | -1.4651121 | LOC1002070 XM_002165471.1   |
| DM05184P1 | 0.03347529 | 1.4780734  |                             |
| DM06439P4 | 0.00160367 | -1.4224464 |                             |
| DM04662P1 | 0.0181898  | -1.371105  |                             |
| DM14845P1 | 0.00659757 | 1.6065801  |                             |
| DM05780P1 | 0.03748432 | -1.305809  |                             |
| DM11449P1 | 0.00683771 | -1.6423937 |                             |
| DM07286P2 | 0.01269089 | 1.8080722  | MONBRDRAFT XM_001747075.1   |
| DM05295P3 | 0.00379763 | -1.3963618 |                             |
| DM12561P1 | 0.01055771 | -1.3747791 | Dgri\GH1150 XM_001989018.1  |
| DM05361P1 | 2.33E-04   | -1.8451772 |                             |
| DM00708P4 | 0.03099879 | -1.234312  | LOC1002261 XM_002191632.1   |
| DM03628P2 | 6.45E-04   | 1.4355099  | AgaP_AGAP0 XM_307608.4      |
| DM07331P2 | 0.01315262 | 1.5462177  |                             |
| DM05415P1 | 0.00237779 | 1.5664456  |                             |
| DM01788P1 | 0.03200834 | -1.344586  | LOC408412 XM_391959.3       |
| DM05840P4 | 0.00193581 | 2.2282536  |                             |
| DM10939P3 | 0.02338264 | 1.6451756  |                             |
| DM06422P2 | 0.00413734 | 1.3636675  |                             |
| DM08641P2 | 0.03518355 | 1.3788948  |                             |
| DM02696P3 | 0.02052519 | -1.5070635 | Fkbp13 XM_002091496.1       |
| DM09090P1 | 0.03991546 | 1.3560681  |                             |
| DM12820P3 | 4.44E-04   | -1.5435088 |                             |
| DM05091P2 | 0.00343404 | -3.0488906 |                             |
| DM02391P3 | 0.02429637 | 1.5319792  | Dmoj\GI1705 XM_002001782.1  |
| DM03294P1 | 0.0222477  | -1.3151183 |                             |
| DM11881P1 | 0.01370571 | -1.4962004 | LOC1001140 XM_001601345.1   |
| DM06827P3 | 0.0465643  | 1.3851365  |                             |
| DM00857P1 | 0.03447203 | -1.796717  |                             |
| DM11395P3 | 0.01370242 | 1.3892163  |                             |
| DM01866P2 | 0.00628716 | -1.3770419 | LOC1002044 XM_002158614.1   |
| DM10569P3 | 0.01261094 | 1.5995376  |                             |
| DM11178P2 | 0.03823426 | -1.3590826 |                             |
| DM10651P2 | 0.00473009 | -1.4159273 |                             |
| DM06848P1 | 0.00496041 | -1.2776312 |                             |
| DM08243P1 | 0.03729298 | 1.5249678  |                             |
| DM10782P2 | 0.00668586 | -1.3126357 |                             |
| DM01348P3 | 0.00150511 | -1.4996033 | Dvir\GJ18121 XM_002057389.1 |
| DM05816P4 | 0.00546258 | -1.600958  | AN6119.2 XM_658631.1        |
| DM02783P3 | 7.91E-04   | 1.2810932  |                             |
| DM00042P4 | 6.16E-04   | -1.3653448 | Dmoj\GI2215 XM_002001067.1  |
| DM02677P3 | 1.58E-05   | 1.6785382  |                             |
| DM09033P3 | 2.45E-04   | 1.2935737  |                             |
| DM00804P3 | 0.00145963 | -1.5567164 | BRAFLDRAFT XM_002608298.1   |
| DM03643P3 | 2.79E-05   | -1.3685321 | LOC413006 XM_396457.1       |
| DM06924P4 | 0.01012293 | 1.3873801  |                             |

|           |            |            |              |                |
|-----------|------------|------------|--------------|----------------|
| DM03010P1 | 0.00700993 | 1.8625427  | CG18619      | NM_164905.1    |
| DM02778P3 | 0.00806595 | 1.1845309  | Dgri\GH1062  | XM_001988289.1 |
| DM01417P3 | 0.01521678 | -1.3805947 | PSMD1        | NM_001092985.1 |
| DM06553P3 | 0.02018262 | 1.2682173  |              |                |
| DM07959P3 | 0.01278626 | -1.4361715 |              |                |
| DM14934P3 | 0.01961665 | 1.2943     |              |                |
| DM12037P2 | 0.02665919 | 1.3874964  |              |                |
| DM13348P1 | 0.02771151 | -1.5045599 |              |                |
| DM12598P3 | 0.00218112 | 1.808197   |              |                |
| DM03324P2 | 0.00483306 | 1.245071   | POPTRDRAFT   | XM_002306684.1 |
| DM03085P2 | 0.00728427 | -1.5786915 | CpipJ_CPIJ00 | XM_001842324.1 |
| DM00184P2 | 0.00357956 | -1.3862787 | Ap2a2        | NM_001142851.1 |
| DM08270P1 | 0.00385422 | 2.2270842  |              |                |
| DM02934P2 | 0.02492874 | 1.4223802  |              |                |
| DM08586P1 | 0.02084115 | -4.2015634 |              |                |
| DM03035P1 | 0.00749613 | -1.2441108 | Dgri\GH1373  | XM_001993272.1 |
| DM05674P1 | 0.00643749 | -1.4482263 |              |                |
| DM06011P2 | 0.00435118 | -1.2812625 |              |                |
| DM02077P4 | 0.01101194 | -1.295536  | LOC550827    | XM_623217.2    |
| DM03919P4 | 0.01807535 | -1.2063743 | LOC664499    | XM_970500.1    |
| DM06980P3 | 0.02476961 | -1.4401436 |              |                |
| DM14212P1 | 0.0016009  | 1.253577   |              |                |
| DM09080P3 | 0.0105863  | 1.6290419  |              |                |
| DM00863P2 | 0.01166774 | 1.1510477  | Dyak\GE1439  | XM_002092764.1 |
| DM02646P3 | 0.01121093 | 1.3401352  | LOC661163    | XM_967342.2    |
| DM08130P3 | 0.01087195 | 1.748114   |              |                |
| DM05350P4 | 0.00769888 | -1.4531555 |              |                |
| DM07474P4 | 0.00246379 | 1.573901   |              |                |
| DM02281P1 | 0.00806011 | 1.3058428  |              |                |
| DM07744P4 | 0.01912847 | 1.5838183  |              |                |
| DM12973P3 | 0.01602197 | 1.6316973  |              |                |
| DM06917P2 | 0.01024604 | -1.4266237 |              |                |
| DM09680P3 | 8.48E-04   | 1.6525604  |              |                |
| DM03339P1 | 0.01407507 | -1.1727334 | Dana\GF1974  | XM_001967664.1 |
| DM06135P2 | 0.00321671 | -3.1811564 |              |                |
| DM04879P4 | 0.00472987 | -1.6950063 |              |                |
| DM06113P3 | 0.00223255 | 1.2114217  | Dgri\GH1804  | XM_001990790.1 |
| DM10885P3 | 0.03455396 | -1.5600876 |              |                |
| DM10398P4 | 0.0136346  | -1.2441626 |              |                |
| DM09111P3 | 0.00908399 | -1.3297634 |              |                |
| DM13325P4 | 0.01392552 | -1.4707118 |              |                |
| DM12378P1 | 0.00612586 | 1.2888643  |              |                |
| DM11200P2 | 0.02886125 | -1.4218817 |              |                |
| DM12577P2 | 0.02448784 | 1.2951106  | IscW_ISCW0   | XM_002404024.1 |
| DM10715P2 | 0.01457329 | 1.2526641  |              |                |
| DM08171P1 | 0.00221765 | 1.6462518  |              |                |
| DM10619P4 | 1.17E-05   | -1.6193746 |              |                |
| DM02487P3 | 0.00894828 | 1.5181334  | LOC1002270   | XM_002191176.1 |
| DM06383P2 | 0.00554638 | 2.7588084  |              |                |

|           |            |            |              |                |
|-----------|------------|------------|--------------|----------------|
| DM06992P4 | 0.01578902 | -1.8415576 |              |                |
| DM06375P1 | 8.79E-04   | -1.4363205 | NEMVEDRAFT   | XM_001630386.1 |
| DM03026P2 | 0.02729249 | -1.8432978 |              |                |
| DM10907P2 | 0.01043481 | -1.2920326 | Dsec\GM113E  | XM_002041753.1 |
| DM00398P2 | 0.00339621 | -1.3740343 | LOC1000841C  | XM_001514656.1 |
| DM01089P4 | 5.65E-04   | -1.4019068 | btk29a       | XM_001842404.1 |
| DM00011P3 | 0.00578057 | -1.210461  | Dmoj\GI1999  | XM_002004510.1 |
| DM11271P4 | 0.00499387 | 1.1988616  |              |                |
| DM03926P2 | 5.74E-04   | 1.9931761  | LOC663265    | XM_969321.2    |
| DM14648P1 | 0.00315122 | 1.3051229  |              |                |
| DM01365P3 | 0.00453524 | -1.6078746 | EIF3L        | NM_145139.2    |
| DM11990P3 | 0.02455397 | -1.4895115 |              |                |
| DM09384P4 | 6.87E-04   | 2.2118337  |              |                |
| DM11525P1 | 0.01790485 | 1.3826263  |              |                |
| DM06767P1 | 0.00603921 | -2.1511068 |              |                |
| DM03542P2 | 0.00572226 | -1.2150824 | Dere\GG1853  | XM_001976854.1 |
| DM04988P2 | 0.00248792 | -1.2539041 |              |                |
| DM06589P2 | 0.01646949 | -1.3451747 | HM13         | XM_393360.3    |
| DM14481P3 | 0.01662429 | 2.3420947  |              |                |
| DM00677P2 | 0.04716231 | -1.2477136 | LOC1001234C  | XM_001606991.1 |
| DM12798P2 | 3.24E-04   | 2.6405118  |              |                |
| DM11300P2 | 0.00132057 | -1.1899898 |              |                |
| DM08958P1 | 0.03755837 | 1.4151133  |              |                |
| DM11815P4 | 0.00958317 | -1.4170821 |              |                |
| DM05024P4 | 0.0121316  | -1.5203468 |              |                |
| DM02657P2 | 0.0060155  | -1.6682506 |              |                |
| DM00945P2 | 0.00162413 | -1.3291618 | LOC1001420E  | XM_001811987.1 |
| DM03924P2 | 0.00143508 | -1.4448414 | Dyak\GE105C  | XM_002088897.1 |
| DM10692P1 | 0.01360844 | 1.157434   |              |                |
| DM11756P2 | 0.03926097 | -1.2332143 |              |                |
| DM05197P3 | 0.00276785 | 1.3002946  |              |                |
| DM07118P4 | 0.01589868 | -1.5072314 |              |                |
| DM02881P2 | 0.00800619 | 1.7594843  | Dere\GG1205  | XM_001981390.1 |
| DM12278P1 | 0.02150013 | 1.5772874  |              |                |
| DM12588P1 | 0.02054649 | -1.3294796 |              |                |
| DM03834P3 | 9.81E-04   | -1.423031  |              |                |
| DM11902P1 | 0.00605504 | 1.6095899  |              |                |
| DM09247P2 | 0.00108849 | -1.7905928 |              |                |
| DM08449P1 | 0.01588013 | 1.7016345  |              |                |
| DM09994P2 | 0.00642617 | -2.0655518 |              |                |
| DM03523P2 | 0.01717757 | -1.3384446 | POLR2G       | NM_026329.2    |
| DM04131P4 | 0.03193969 | 1.5002313  |              |                |
| DM11691P1 | 0.02959921 | -1.409768  |              |                |
| DM01735P4 | 0.01471374 | -1.3189368 | TUBA         | XM_001663357.1 |
| DM06828P3 | 0.0268226  | 1.8185015  |              |                |
| DM04551P2 | 0.00990856 | 1.4085472  |              |                |
| DM07342P3 | 0.0238663  | 1.4148651  |              |                |
| DM00324P3 | 0.00355781 | -1.405183  | CpipJ_CPIJ01 | XM_001863386.1 |
| DM09215P1 | 0.00111192 | -1.5137621 |              |                |



|           |            |            |             |                |
|-----------|------------|------------|-------------|----------------|
| DM13006P2 | 0.00299809 | 1.5827451  |             |                |
| DM12253P4 | 0.00149022 | 1.8602496  |             |                |
| DM15169P2 | 0.03504846 | -1.3797857 |             |                |
| DM12891P1 | 0.00322129 | 1.2567674  |             |                |
| DM01904P2 | 0.00441921 | -1.38439   | LOC692970   | NM_001046809.1 |
| DM00502P3 | 0.00558119 | -1.1564989 | LOC580289   | XM_780359.2    |
| DM14465P1 | 0.01784776 | 1.3976761  |             |                |
| DM05392P3 | 4.09E-04   | -3.1052299 |             |                |
| DM11159P1 | 0.01338232 | 1.5858722  |             |                |
| DM03943P3 | 0.01055619 | -1.365019  |             |                |
| DM07401P1 | 6.06E-04   | 3.0359395  |             |                |
| DM11255P4 | 0.01678782 | -1.3132753 |             |                |
| DM01608P2 | 0.00204518 | -1.2908365 | glyg        | NM_001139830.1 |
| DM12745P2 | 0.02505237 | -1.6741168 |             |                |
| DM12734P1 | 0.0020554  | -1.5052968 |             |                |
| DM07032P4 | 0.02275109 | -4.490636  |             |                |
| DM10469P3 | 1.15E-04   | 1.3283947  |             |                |
| DM11354P1 | 0.00498243 | 4.53424    |             |                |
| DM10979P1 | 0.0169944  | -1.454594  |             |                |
| DM03743P4 | 0.01411999 | -1.3304929 | AaeL_AAEL01 | XM_001663335.1 |
| DM04550P1 | 0.01496403 | -1.3564175 |             |                |
| DM09018P3 | 0.04914017 | 1.4668043  |             |                |
| DM05334P3 | 0.0049639  | -1.7397689 |             |                |
| DM08688P4 | 0.00444455 | -1.2819328 |             |                |
| DM01209P1 | 0.01929679 | -1.2503467 | TRIADDRAFT_ | XM_002109158.1 |
| DM00745P4 | 0.00760801 | -1.6270081 | LOC10011529 | XM_001599874.1 |
| DM07111P3 | 0.00498795 | 1.5686294  |             |                |
| DM07957P3 | 0.00388734 | 1.5385466  |             |                |
| DM08398P1 | 0.00845593 | -1.2702535 |             |                |
| DM02864P3 | 0.01592752 | -1.2495701 |             |                |
| DM12834P1 | 2.16E-05   | -2.2097611 |             |                |
| DM02477P1 | 0.01948541 | -1.3912969 | LOC10015906 | XM_001951172.1 |
| DM07260P3 | 0.00115634 | 1.4432288  |             |                |
| DM01448P4 | 0.00226137 | -1.3294228 | LOC10016170 | XM_001950712.1 |
| DM06231P4 | 0.00824367 | 2.227586   |             |                |
| DM01575P4 | 0.03226379 | -1.2622122 | PPP2R1A     | NM_204074.1    |
| DM11880P2 | 0.00167083 | 2.0524833  |             |                |
| DM09121P1 | 0.00309363 | 2.372035   |             |                |
| DM03273P1 | 0.01250554 | 1.3529309  | LOC10016124 | XM_001951787.1 |
| DM09038P2 | 0.04753017 | -1.2892482 |             |                |
| DM07978P2 | 0.0034557  | 1.5330492  |             |                |
| DM00587P3 | 0.00318385 | 1.7457117  | LOC412744   | XM_396197.3    |
| DM05406P3 | 0.01684897 | -1.2304292 |             |                |
| DM01703P3 | 0.012034   | -1.3942645 | Dsec\GM2019 | XM_002033852.1 |
| DM03121P3 | 0.00388067 | -1.4867568 | Dwi\GK2156  | XM_002063059.1 |
| DM08436P1 | 0.00189997 | -1.5757313 | C27H5.3     | NM_063082.3    |
| DM14137P3 | 0.03423846 | -1.7603062 |             |                |
| DM07487P2 | 0.00281891 | -1.2151709 |             |                |
| DM00180P3 | 0.00950045 | -1.3679115 | CtBP        | NM_001014617.1 |

|           |            |            |              |                |
|-----------|------------|------------|--------------|----------------|
| DM14182P2 | 2.03E-06   | 1.7842569  |              |                |
| DM08419P1 | 0.03277608 | -1.4593079 | Dwil\GK1680  | XM_002062121.1 |
| DM11035P1 | 5.64E-05   | -2.1148248 |              |                |
| DM10570P2 | 0.00146185 | 4.626853   |              |                |
| DM00206P2 | 8.98E-04   | -1.138372  | galnt7       | XM_001865749.1 |
| DM10878P2 | 0.00865801 | -1.4711703 |              |                |
| DM01103P3 | 0.01587386 | -1.3148203 | PSAT1        | NM_001046804.1 |
| DM10366P1 | 0.00202471 | -1.5640006 | LOC10001976  | XM_001366295.1 |
| DM13900P3 | 0.04226634 | -1.72669   |              |                |
| DM11339P2 | 6.16E-04   | -1.5356222 |              |                |
| DM07237P1 | 0.01012799 | 1.4695889  | Dwil\GK1051  | XM_002074398.1 |
| DM10762P3 | 0.00631372 | -1.8074386 |              |                |
| DM02435P3 | 0.00647745 | 1.6274397  | COLP3alpha   | NM_214466.1    |
| DM14761P1 | 0.01291189 | 1.8494972  |              |                |
| DM14317P1 | 0.01162688 | 1.2975658  |              |                |
| DM13940P1 | 0.00720568 | 1.5042467  |              |                |
| DM07253P2 | 0.03712048 | -1.2249743 |              |                |
| DM01331P2 | 0.02889521 | 1.2208332  |              |                |
| DM02095P3 | 0.01773858 | -1.5117053 | Nurf55       | XM_001602871.1 |
| DM09549P2 | 0.017256   | 1.623097   |              |                |
| DM06825P2 | 2.29E-05   | -2.3614647 |              |                |
| DM04669P3 | 0.00350646 | -4.7050714 |              |                |
| DM07921P1 | 0.01244288 | 1.3443977  |              |                |
| DM05631P2 | 0.00405685 | -2.4438553 |              |                |
| DM09027P1 | 0.00584773 | -2.478854  |              |                |
| DM07285P1 | 0.02938073 | -1.4777465 |              |                |
| DM07431P1 | 0.00798837 | 1.3037003  |              |                |
| DM11715P2 | 0.01078016 | -1.4761201 |              |                |
| DM02639P2 | 0.00531963 | 1.6729913  | RSAD2        | NM_001025556.1 |
| DM04798P2 | 0.04934276 | -1.2338883 |              |                |
| DM09832P1 | 0.00965989 | -1.3124746 |              |                |
| DM06102P4 | 0.01709496 | -1.3955173 |              |                |
| DM04741P4 | 0.00436081 | -1.5062551 |              |                |
| DM02556P3 | 0.03015743 | -1.4776404 | Dvir\GJ2188E | XM_002049942.1 |
| DM06621P4 | 0.03734398 | -1.4597744 |              |                |
| DM03942P1 | 0.00667547 | 1.6353955  |              |                |
| DM10049P3 | 0.03227253 | -1.4805546 |              |                |
| DM09712P3 | 0.02865862 | -1.3151587 |              |                |
| DM11589P3 | 0.0032182  | -1.3355603 |              |                |
| DM02424P3 | 0.00764652 | 1.4979167  | LOC659301    | XM_965620.2    |
| DM05642P3 | 0.01033443 | 1.6948025  |              |                |
| DM08429P1 | 0.00319818 | 1.5840813  |              |                |
| DM01462P3 | 0.02447412 | -1.3004061 | NfxI1        | NM_133921.2    |
| DM00739P3 | 0.01891105 | -1.4575396 | LOC10016392  | XM_001952079.1 |
| DM07747P3 | 0.00794037 | -1.4398923 | NEMVEDRAFT   | XM_001647469.1 |
| DM03778P2 | 0.00253768 | -1.3534142 |              |                |
| DM06238P1 | 0.03744772 | -1.6342117 |              |                |
| DM01960P3 | 0.0073556  | -1.3889612 | Dvir\GJ23202 | XM_002053671.1 |
| DM00462P2 | 0.00854976 | -1.3923445 | Dwil\GK2214  | XM_002066013.1 |

|           |            |            |                             |
|-----------|------------|------------|-----------------------------|
| DM14060P2 | 3.83E-04   | 1.2963109  |                             |
| DM13231P2 | 0.01505392 | -1.2570235 |                             |
| DM14064P3 | 0.01185087 | 1.5443327  | Dvir\GJ19139 XM_002054973.1 |
| DM01497P2 | 0.02379726 | 1.3808792  |                             |
| DM06922P2 | 0.00131003 | -2.4934065 |                             |
| DM02402P3 | 1.38E-04   | 2.2530336  | POPTRDRAFT_XM_002337564.1   |
| DM02872P3 | 0.01057863 | 1.6160204  |                             |
| DM09625P1 | 0.00188975 | 1.6580987  |                             |
| DM06320P3 | 0.00154922 | 2.2284632  |                             |
| DM00852P2 | 0.00207249 | -1.4017327 | LOC551987 XM_624370.2       |
| DM01065P4 | 0.01418969 | 1.353406   | LOC10007394 XM_001505570.1  |
| DM09546P3 | 0.00103436 | -1.461655  |                             |
| DM11342P2 | 0.00287563 | -1.5309688 | C27H5.3 NM_063082.3         |
| DM02070P2 | 0.00338632 | -1.4497867 | Dana\GF1656 XM_001954760.1  |
| DM00764P2 | 0.00487296 | -1.4003564 | NEMVEDRAFT XM_001632034.1   |
| DM02773P4 | 0.04518166 | -1.2406995 | SKP1 XM_969431.2            |
| DM07050P2 | 0.00137485 | -2.7859137 |                             |
| DM06685P1 | 0.00735706 | -1.1973162 |                             |
| DM05888P1 | 0.02603153 | -1.4856431 | Dgri\GH1103 XM_001988165.1  |
| DM07162P2 | 7.54E-05   | -5.1880774 |                             |
| DM03794P1 | 0.00476987 | -1.3229667 |                             |
| DM01099P3 | 0.00196781 | -1.6489714 | LOC1002054 XM_002163856.1   |
| DM05329P3 | 0.01344867 | -1.424715  | PSMD8 XM_523879.2           |
| DM13939P2 | 0.00593692 | -1.4337049 |                             |
| DM03384P3 | 0.02154919 | -1.27853   |                             |
| DM12086P2 | 0.01129696 | -1.3258493 |                             |
