# Supplementary material
Source: PubMed Central journal article supplement (PMC4120942)
Supplement: NIHMS592482-supplement-Supplementary_Data_Table_6.pdf [file NIHMS592482-supplement-Supplementary_Data_Table_6.pdf]

**Table S6: Functional Annotation TNT 0.004 mg/L**

| <b>Biological Functions</b>               | <b>p-Value</b> |
|-------------------------------------------|----------------|
| Amino Acid Metabolism                     | 1.00E-04       |
| Embryonic Development                     | 1.05E-04       |
| Organ Development                         | 1.05E-04       |
| Organ Morphology                          | 1.05E-04       |
| Organismal Development                    | 1.05E-04       |
| Tissue Development                        | 1.05E-04       |
| Visual System Development and Function    | 1.05E-04       |
| Visual System Development and Function    | 1.88E-04       |
| Tissue Morphology                         | 1.88E-04       |
| Carbohydrate Metabolism                   | 4.79E-04       |
| Amino Acid Metabolism                     | 4.79E-04       |
| Drug Metabolism                           | 4.79E-04       |
| Small Molecule Biochemistry               | 4.79E-04       |
| Vitamin and Mineral Metabolism            | 4.79E-04       |
| Embryonic Development                     | 4.79E-04       |
| Organ Development                         | 4.79E-04       |
| Organismal Development                    | 4.79E-04       |
| Tissue Development                        | 4.79E-04       |
| Visual System Development and Function    | 4.79E-04       |
| Cellular Assembly and Organization        | 4.79E-04       |
| Cellular Development                      | 4.79E-04       |
| Cellular Assembly and Organization        | 4.79E-04       |
| Developmental Disorder                    | 4.79E-04       |
| Hereditary Disorder                       | 4.79E-04       |
| Metabolic Disease                         | 4.79E-04       |
| Neurological Disease                      | 4.79E-04       |
| Visual System Development and Function    | 4.79E-04       |
| Cell Death and Survival                   | 4.79E-04       |
| Lipid Metabolism                          | 4.79E-04       |
| Small Molecule Biochemistry               | 4.79E-04       |
| Developmental Disorder                    | 4.79E-04       |
| Hereditary Disorder                       | 4.79E-04       |
| Metabolic Disease                         | 4.79E-04       |
| Renal and Urological Disease              | 4.79E-04       |
| Lipid Metabolism                          | 4.79E-04       |
| Small Molecule Biochemistry               | 4.79E-04       |
| Cell Death and Survival                   | 4.79E-04       |
| Organ Morphology                          | 5.47E-04       |
| Tissue Morphology                         | 5.47E-04       |
| Cell Morphology                           | 5.47E-04       |
| Digestive System Development and Function | 5.47E-04       |
| Hepatic System Development and Function   | 5.47E-04       |
| Embryonic Development                     | 5.76E-04       |
| Organ Development                         | 5.76E-04       |
| Organ Morphology                          | 5.76E-04       |
| Organismal Development                    | 5.76E-04       |

| <b>Toxicological Functions</b> | <b>p-value</b> |
|--------------------------------|----------------|
| Renal Inflammation             | 1.44E-03       |
| Renal Nephritis                | 1.44E-03       |
| Cardiac Inflammation           | 8.11E-03       |
| Cardiac Necrosis/Cell Death    | 1.62E-02       |
| Liver Cholestasis              | 2.84E-02       |

| <b>Toxicological Lists</b>          | <b>p-value</b> |
|-------------------------------------|----------------|
| Fatty Acid Metabolism               | 0.05495        |
| Aryl Hydrocarbon Receptor Signaling | 0.07244        |
| Cardiac Necrosis/Cell Death         | 0.10375        |
| Xenobiotic Metabolism Signaling     | 0.15488        |

|                                     |          |
|-------------------------------------|----------|
| Tissue Development                  | 5.76E-04 |
| Visual System Development and Funct | 5.76E-04 |
| Organ Morphology                    | 7.02E-04 |
| Nervous System Development and Fun  | 7.02E-04 |
| Developmental Disorder              | 9.57E-04 |
| Hereditary Disorder                 | 9.57E-04 |
| Ophthalmic Disease                  | 9.57E-04 |
| Cell Death and Survival             | 9.57E-04 |
| Cellular Assembly and Organization  | 9.57E-04 |
| Visual System Development and Funct | 9.57E-04 |
| Lipid Metabolism                    | 9.57E-04 |
| Small Molecule Biochemistry         | 9.57E-04 |
| Lipid Metabolism                    | 9.57E-04 |
| Small Molecule Biochemistry         | 9.57E-04 |
| Small Molecule Biochemistry         | 9.57E-04 |
| Energy Production                   | 9.57E-04 |
| Renal and Urological Disease        | 1.44E-03 |
| Inflammatory Disease                | 1.44E-03 |
| Inflammatory Response               | 1.44E-03 |
| Visual System Development and Funct | 1.44E-03 |
| Nervous System Development and Fun  | 1.44E-03 |
| Cell Signaling                      | 1.44E-03 |
| Organ Morphology                    | 1.91E-03 |
| Digestive System Development and Fu | 1.91E-03 |
| Hepatic System Development and Fun  | 1.91E-03 |
| Cell Death and Survival             | 1.91E-03 |
| Cellular Function and Maintenance   | 1.91E-03 |
| Ophthalmic Disease                  | 1.91E-03 |
| Hereditary Disorder                 | 1.91E-03 |
| Ophthalmic Disease                  | 1.91E-03 |
| Cell Death and Survival             | 2.39E-03 |
| Cellular Function and Maintenance   | 2.39E-03 |
| Cellular Assembly and Organization  | 2.39E-03 |
| Cellular Function and Maintenance   | 2.39E-03 |
| Cellular Compromise                 | 2.39E-03 |
| Embryonic Development               | 2.87E-03 |
| Organ Development                   | 2.87E-03 |
| Organ Morphology                    | 2.87E-03 |
| Organismal Development              | 2.87E-03 |
| Tissue Development                  | 2.87E-03 |
| Visual System Development and Funct | 2.87E-03 |
| Tissue Morphology                   | 2.87E-03 |
| Cell Morphology                     | 2.87E-03 |
| Vitamin and Mineral Metabolism      | 2.87E-03 |
| Cell Signaling                      | 2.87E-03 |
| Cell Signaling                      | 2.87E-03 |
| Organ Morphology                    | 3.34E-03 |
| Digestive System Development and Fu | 3.34E-03 |
| Hepatic System Development and Fun  | 3.34E-03 |

|                                       |          |
|---------------------------------------|----------|
| Embryonic Development                 | 3.35E-03 |
| Organ Development                     | 3.35E-03 |
| Organ Morphology                      | 3.35E-03 |
| Organismal Development                | 3.35E-03 |
| Tissue Development                    | 3.35E-03 |
| Visual System Development and Funct   | 3.35E-03 |
| Tissue Morphology                     | 3.35E-03 |
| Cell Morphology                       | 3.35E-03 |
| Lipid Metabolism                      | 3.35E-03 |
| Small Molecule Biochemistry           | 3.35E-03 |
| Post-Translational Modification       | 3.35E-03 |
| Ophthalmic Disease                    | 3.59E-03 |
| Organ Morphology                      | 3.82E-03 |
| Embryonic Development                 | 3.82E-03 |
| Organ Development                     | 3.82E-03 |
| Organismal Development                | 3.82E-03 |
| Tissue Development                    | 3.82E-03 |
| Visual System Development and Funct   | 3.82E-03 |
| Cellular Assembly and Organization    | 3.82E-03 |
| Cellular Development                  | 3.82E-03 |
| Cell Morphology                       | 3.82E-03 |
| Small Molecule Biochemistry           | 3.82E-03 |
| Energy Production                     | 3.82E-03 |
| DNA Replication, Recombination, and P | 3.82E-03 |
| Nucleic Acid Metabolism               | 3.82E-03 |
| Small Molecule Biochemistry           | 3.82E-03 |
| Energy Production                     | 3.82E-03 |
| Molecular Transport                   | 3.82E-03 |
| Tissue Morphology                     | 3.82E-03 |
| Visual System Development and Funct   | 3.82E-03 |
| Tissue Morphology                     | 3.82E-03 |
| Cellular Assembly and Organization    | 3.82E-03 |
| Cellular Function and Maintenance     | 3.82E-03 |
| Neurological Disease                  | 3.82E-03 |
| Post-Translational Modification       | 3.96E-03 |
| Protein Degradation                   | 3.96E-03 |
| Protein Synthesis                     | 3.96E-03 |
| Embryonic Development                 | 4.30E-03 |
| Organ Development                     | 4.30E-03 |
| Organ Morphology                      | 4.30E-03 |
| Organismal Development                | 4.30E-03 |
| Tissue Development                    | 4.30E-03 |
| Visual System Development and Funct   | 4.30E-03 |
| Tissue Morphology                     | 4.30E-03 |
| Cell Morphology                       | 4.30E-03 |
| Nervous System Development and Fur    | 4.30E-03 |
| Visual System Development and Funct   | 4.30E-03 |
| Cellular Function and Maintenance     | 4.30E-03 |
| Lipid Metabolism                      | 4.30E-03 |

|                                     |          |
|-------------------------------------|----------|
| Small Molecule Biochemistry         | 4.30E-03 |
| Vitamin and Mineral Metabolism      | 4.30E-03 |
| Energy Production                   | 4.30E-03 |
| Visual System Development and Funct | 4.30E-03 |
| Cell Death and Survival             | 4.59E-03 |
| Organ Morphology                    | 4.78E-03 |
| Nervous System Development and Fur  | 4.78E-03 |
| Embryonic Development               | 4.78E-03 |
| Organ Development                   | 4.78E-03 |
| Organ Morphology                    | 4.78E-03 |
| Organismal Development              | 4.78E-03 |
| Tissue Development                  | 4.78E-03 |
| Visual System Development and Funct | 4.78E-03 |
| Tissue Morphology                   | 4.78E-03 |
| Cell Morphology                     | 4.78E-03 |
| Embryonic Development               | 4.78E-03 |
| Organ Development                   | 4.78E-03 |
| Organ Morphology                    | 4.78E-03 |
| Organismal Development              | 4.78E-03 |
| Tissue Development                  | 4.78E-03 |
| Visual System Development and Funct | 4.78E-03 |
| Tissue Morphology                   | 4.78E-03 |
| Cell Morphology                     | 4.78E-03 |
| Metabolic Disease                   | 4.78E-03 |
| Hematological Disease               | 4.78E-03 |
| Neurological Disease                | 4.96E-03 |
| Hereditary Disorder                 | 5.26E-03 |
| Ophthalmic Disease                  | 5.26E-03 |
| Amino Acid Metabolism               | 5.26E-03 |
| Drug Metabolism                     | 5.26E-03 |
| Small Molecule Biochemistry         | 5.26E-03 |
| Vitamin and Mineral Metabolism      | 5.26E-03 |
| Molecular Transport                 | 5.26E-03 |
| Hereditary Disorder                 | 5.73E-03 |
| Ophthalmic Disease                  | 5.73E-03 |
| Tissue Morphology                   | 5.73E-03 |
| Tissue Morphology                   | 6.21E-03 |
| Cell Morphology                     | 6.21E-03 |
| Nervous System Development and Fur  | 6.21E-03 |
| Amino Acid Metabolism               | 6.21E-03 |
| Small Molecule Biochemistry         | 6.21E-03 |
| Molecular Transport                 | 6.21E-03 |
| Ophthalmic Disease                  | 6.21E-03 |
| Lipid Metabolism                    | 6.21E-03 |
| Small Molecule Biochemistry         | 6.21E-03 |
| Amino Acid Metabolism               | 6.21E-03 |
| Small Molecule Biochemistry         | 6.21E-03 |
| Molecular Transport                 | 6.21E-03 |
| Embryonic Development               | 6.68E-03 |

|                                         |          |
|-----------------------------------------|----------|
| Organ Development                       | 6.68E-03 |
| Organ Morphology                        | 6.68E-03 |
| Organismal Development                  | 6.68E-03 |
| Tissue Development                      | 6.68E-03 |
| Visual System Development and Function  | 6.68E-03 |
| Tissue Morphology                       | 6.68E-03 |
| Cell Morphology                         | 6.68E-03 |
| Cancer                                  | 6.68E-03 |
| Cellular Compromise                     | 6.68E-03 |
| Hematological Disease                   | 6.68E-03 |
| Cancer                                  | 6.68E-03 |
| Amino Acid Metabolism                   | 6.68E-03 |
| Small Molecule Biochemistry             | 6.68E-03 |
| Molecular Transport                     | 6.68E-03 |
| Nucleic Acid Metabolism                 | 6.68E-03 |
| Hematological Disease                   | 6.68E-03 |
| Cancer                                  | 6.68E-03 |
| Immunological Disease                   | 6.68E-03 |
| Drug Metabolism                         | 6.68E-03 |
| Lipid Metabolism                        | 6.68E-03 |
| Small Molecule Biochemistry             | 6.68E-03 |
| Vitamin and Mineral Metabolism          | 6.68E-03 |
| Cancer                                  | 6.68E-03 |
| Endocrine System Disorders              | 6.68E-03 |
| Reproductive System Disease             | 6.68E-03 |
| Tissue Morphology                       | 6.83E-03 |
| Cell Morphology                         | 6.83E-03 |
| Nervous System Development and Function | 6.83E-03 |
| Cancer                                  | 7.16E-03 |
| Reproductive System Disease             | 7.16E-03 |
| Amino Acid Metabolism                   | 7.16E-03 |
| Small Molecule Biochemistry             | 7.16E-03 |
| Molecular Transport                     | 7.16E-03 |
| Cellular Compromise                     | 7.16E-03 |
| Ophthalmic Disease                      | 7.16E-03 |
| Hereditary Disorder                     | 7.64E-03 |
| Inflammatory Disease                    | 7.64E-03 |
| Hematological Disease                   | 7.64E-03 |
| Cancer                                  | 7.64E-03 |
| Organismal Injury and Abnormalities     | 7.74E-03 |
| Organ Morphology                        | 8.11E-03 |
| Nervous System Development and Function | 8.11E-03 |
| Embryonic Development                   | 8.11E-03 |
| Organ Development                       | 8.11E-03 |
| Organ Morphology                        | 8.11E-03 |
| Organismal Development                  | 8.11E-03 |
| Tissue Development                      | 8.11E-03 |
| Visual System Development and Function  | 8.11E-03 |
| Dermatological Diseases and Conditions  | 8.11E-03 |

|                                            |          |
|--------------------------------------------|----------|
| Infectious Disease                         | 8.11E-03 |
| Neurological Disease                       | 8.11E-03 |
| Ophthalmic Disease                         | 8.11E-03 |
| Cellular Compromise                        | 8.11E-03 |
| Inflammatory Disease                       | 8.11E-03 |
| Cardiovascular Disease                     | 8.11E-03 |
| Visual System Development and Function     | 8.11E-03 |
| Nervous System Development and Function    | 8.59E-03 |
| Embryonic Development                      | 8.59E-03 |
| Organ Development                          | 8.59E-03 |
| Organ Morphology                           | 8.59E-03 |
| Organismal Development                     | 8.59E-03 |
| Tissue Development                         | 8.59E-03 |
| Visual System Development and Function     | 8.59E-03 |
| Immunological Disease                      | 8.59E-03 |
| Organismal Injury and Abnormalities        | 8.59E-03 |
| Tissue Morphology                          | 8.59E-03 |
| Neurological Disease                       | 8.59E-03 |
| Cancer                                     | 8.59E-03 |
| Cellular Assembly and Organization         | 9.06E-03 |
| Cell Morphology                            | 9.06E-03 |
| Small Molecule Biochemistry                | 9.06E-03 |
| Energy Production                          | 9.06E-03 |
| DNA Replication, Recombination, and Repair | 9.06E-03 |
| Nucleic Acid Metabolism                    | 9.06E-03 |
| Post-Translational Modification            | 1.00E-02 |
| Cell Morphology                            | 1.05E-02 |
| Cellular Function and Maintenance          | 1.05E-02 |
| Amino Acid Metabolism                      | 1.14E-02 |
| Lipid Metabolism                           | 1.14E-02 |
| Small Molecule Biochemistry                | 1.14E-02 |
| Molecular Transport                        | 1.14E-02 |
| Cancer                                     | 1.14E-02 |
| Hematological Disease                      | 1.19E-02 |
| Cancer                                     | 1.19E-02 |
| Cellular Assembly and Organization         | 1.24E-02 |
| Cancer                                     | 1.25E-02 |
| Endocrine System Disorders                 | 1.25E-02 |
| Gastrointestinal Disease                   | 1.25E-02 |
| Developmental Disorder                     | 1.33E-02 |
| Hereditary Disorder                        | 1.33E-02 |
| Metabolic Disease                          | 1.33E-02 |
| Inflammatory Disease                       | 1.33E-02 |
| Connective Tissue Disorders                | 1.33E-02 |
| Skeletal and Muscular Disorders            | 1.33E-02 |
| Cancer                                     | 1.38E-02 |
| Dermatological Diseases and Conditions     | 1.38E-02 |
| Organ Morphology                           | 1.43E-02 |
| Cell Morphology                            | 1.43E-02 |

|                                       |          |
|---------------------------------------|----------|
| Digestive System Development and Fu   | 1.43E-02 |
| Endocrine System Development and Fu   | 1.43E-02 |
| Organ Morphology                      | 1.43E-02 |
| Digestive System Development and Fu   | 1.43E-02 |
| Endocrine System Development and Fu   | 1.43E-02 |
| Organ Morphology                      | 1.43E-02 |
| Tissue Morphology                     | 1.43E-02 |
| Cell Morphology                       | 1.43E-02 |
| Nervous System Development and Fur    | 1.43E-02 |
| Behavior                              | 1.43E-02 |
| Cellular Assembly and Organization    | 1.43E-02 |
| Cellular Function and Maintenance     | 1.43E-02 |
| Cellular Function and Maintenance     | 1.47E-02 |
| Cell Morphology                       | 1.51E-02 |
| Hereditary Disorder                   | 1.52E-02 |
| Renal and Urological Disease          | 1.52E-02 |
| Cancer                                | 1.52E-02 |
| Embryonic Development                 | 1.52E-02 |
| Organ Development                     | 1.52E-02 |
| Organ Morphology                      | 1.52E-02 |
| Organismal Development                | 1.52E-02 |
| Tissue Development                    | 1.52E-02 |
| Visual System Development and Funct   | 1.52E-02 |
| Organ Morphology                      | 1.62E-02 |
| Nervous System Development and Fur    | 1.62E-02 |
| Cell Death and Survival               | 1.62E-02 |
| Organismal Injury and Abnormalities   | 1.66E-02 |
| Respiratory Disease                   | 1.66E-02 |
| Inflammatory Disease                  | 1.66E-02 |
| Hematological Disease                 | 1.66E-02 |
| Cancer                                | 1.66E-02 |
| Dermatological Diseases and Condition | 1.66E-02 |
| Renal and Urological Disease          | 1.66E-02 |
| Cancer                                | 1.66E-02 |
| Cellular Response to Therapeutics     | 1.76E-02 |
| Cancer                                | 1.76E-02 |
| Reproductive System Disease           | 1.76E-02 |
| Organ Morphology                      | 1.81E-02 |
| Nervous System Development and Fur    | 1.81E-02 |
| Organ Morphology                      | 1.81E-02 |
| Renal and Urological System Developm  | 1.81E-02 |
| Cancer                                | 1.81E-02 |
| Hereditary Disorder                   | 1.81E-02 |
| Neurological Disease                  | 1.81E-02 |
| Organ Morphology                      | 1.99E-02 |
| Nervous System Development and Fur    | 1.99E-02 |
| Neurological Disease                  | 2.00E-02 |
| Cancer                                | 2.09E-02 |
| Amino Acid Metabolism                 | 2.09E-02 |

|                                        |          |
|----------------------------------------|----------|
| Small Molecule Biochemistry            | 2.09E-02 |
| Molecular Transport                    | 2.09E-02 |
| Neurological Disease                   | 2.09E-02 |
| Ophthalmic Disease                     | 2.09E-02 |
| Cardiovascular Disease                 | 2.28E-02 |
| Cardiovascular System Development a    | 2.28E-02 |
| Cell Death and Survival                | 2.42E-02 |
| Hematological Disease                  | 2.46E-02 |
| Cancer                                 | 2.46E-02 |
| Post-Translational Modification        | 2.51E-02 |
| Embryonic Development                  | 2.56E-02 |
| Organ Development                      | 2.56E-02 |
| Organ Morphology                       | 2.56E-02 |
| Organismal Development                 | 2.56E-02 |
| Tissue Development                     | 2.56E-02 |
| Visual System Development and Funct    | 2.56E-02 |
| Small Molecule Biochemistry            | 2.56E-02 |
| Cell-To-Cell Signaling and Interaction | 2.56E-02 |
| Cardiovascular Disease                 | 2.65E-02 |
| Cell Death and Survival                | 2.70E-02 |
| Organ Morphology                       | 2.74E-02 |
| Cardiovascular System Development a    | 2.74E-02 |
| Skeletal and Muscular System Develop   | 2.74E-02 |
| Organismal Functions                   | 2.84E-02 |
| Hereditary Disorder                    | 2.84E-02 |
| Gastrointestinal Disease               | 2.84E-02 |
| Hepatic System Disease                 | 2.84E-02 |
| Cancer                                 | 2.93E-02 |
| Reproductive System Disease            | 2.93E-02 |
| Embryonic Development                  | 2.98E-02 |
| Organ Development                      | 2.98E-02 |
| Organ Morphology                       | 2.98E-02 |
| Organismal Development                 | 2.98E-02 |
| Tissue Development                     | 2.98E-02 |
| Visual System Development and Funct    | 2.98E-02 |
| Organ Morphology                       | 3.16E-02 |
| Nervous System Development and Fur     | 3.16E-02 |
| Nervous System Development and Fur     | 3.21E-02 |
| Organismal Injury and Abnormalities    | 3.21E-02 |
| Hereditary Disorder                    | 3.35E-02 |
| Neurological Disease                   | 3.35E-02 |
| Psychological Disorders                | 3.35E-02 |
| Post-Translational Modification        | 3.40E-02 |
| Protein Folding                        | 3.40E-02 |
| Cellular Assembly and Organization     | 3.40E-02 |
| Cellular Function and Maintenance      | 3.40E-02 |
| Small Molecule Biochemistry            | 3.49E-02 |
| Cell Signaling                         | 3.49E-02 |
| DNA Replication, Recombination, and P  | 3.49E-02 |



|                                               |          |
|-----------------------------------------------|----------|
| Nucleic Acid Metabolism                       | 3.49E-02 |
| Lipid Metabolism                              | 3.49E-02 |
| Small Molecule Biochemistry                   | 3.49E-02 |
| Small Molecule Biochemistry                   | 3.54E-02 |
| Cell Signaling                                | 3.54E-02 |
| Nucleic Acid Metabolism                       | 3.54E-02 |
| Hematological System Development and Function | 3.54E-02 |
| Cell Death and Survival                       | 3.61E-02 |
| Nervous System Development and Function       | 3.77E-02 |
| Organismal Functions                          | 3.77E-02 |
| Cancer                                        | 3.77E-02 |
| Skeletal and Muscular Disorders               | 3.77E-02 |
| Digestive System Development and Function     | 3.77E-02 |
| Behavior                                      | 3.77E-02 |
| Cellular Development                          | 3.81E-02 |
| Cellular Growth and Proliferation             | 3.81E-02 |
| Cellular Function and Maintenance             | 3.81E-02 |
| Cellular Development                          | 4.09E-02 |
| Cellular Growth and Proliferation             | 4.09E-02 |
| Reproductive System Development and Function  | 4.09E-02 |
| Cell Death and Survival                       | 4.32E-02 |
| Cellular Assembly and Organization            | 4.64E-02 |
| Organ Morphology                              | 4.78E-02 |
| Nervous System Development and Function       | 4.78E-02 |

| <b>Canonical Pathways</b>                 | <b>pvalue</b> |
|-------------------------------------------|---------------|
| Formaldehyde Oxidation II (Glutathione-d  | 0.004         |
| Methylmalonyl Pathway                     | 0.006         |
| 2-oxobutanoate Degradation I              | 0.008         |
| Ethanol Degradation II                    | 0.02          |
| Noradrenaline and Adrenaline Degradatio   | 0.025         |
| Phototransduction Pathway                 | 0.029         |
| Superpathway of Methionine Degradation    | 0.03          |
| Remodeling of Epithelial Adherens Junctio | 0.032         |
| Serotonin Degradation                     | 0.035         |

|
