# Supplementary material
Source: PubMed Central journal article supplement (PMC4120942)
Supplement: NIHMS592482-supplement-Supplementary_Data_Table_7.pdf [file NIHMS592482-supplement-Supplementary_Data_Table_7.pdf]

**Table S7: Functional Annotation TNT 0.12 mg/L**

| <b>Biological Functions</b>              | <b>p-Value</b> |
|------------------------------------------|----------------|
| Molecular Transport                      | 3.90E-04       |
| Protein Trafficking                      | 3.90E-04       |
| Infectious Disease                       | 6.70E-04       |
| Infectious Disease                       | 9.83E-04       |
| Ophthalmic Disease                       | 1.38E-03       |
| Carbohydrate Metabolism                  | 1.38E-03       |
| Developmental Disorder                   | 1.38E-03       |
| Hereditary Disorder                      | 1.38E-03       |
| Metabolic Disease                        | 1.38E-03       |
| Embryonic Development                    | 1.38E-03       |
| Organismal Development                   | 1.38E-03       |
| Tissue Development                       | 1.38E-03       |
| Cardiovascular Disease                   | 1.38E-03       |
| Hereditary Disorder                      | 1.38E-03       |
| Cardiovascular Disease                   | 1.38E-03       |
| Cellular Assembly and Organization       | 1.38E-03       |
| Developmental Disorder                   | 1.38E-03       |
| Hereditary Disorder                      | 1.38E-03       |
| Metabolic Disease                        | 1.38E-03       |
| Neurological Disease                     | 1.38E-03       |
| Lipid Metabolism                         | 1.38E-03       |
| Small Molecule Biochemistry              | 1.38E-03       |
| Developmental Disorder                   | 1.38E-03       |
| Hereditary Disorder                      | 1.38E-03       |
| Metabolic Disease                        | 1.38E-03       |
| Renal and Urological Disease             | 1.38E-03       |
| Lipid Metabolism                         | 1.38E-03       |
| Small Molecule Biochemistry              | 1.38E-03       |
| Cell Morphology                          | 1.38E-03       |
| Developmental Disorder                   | 1.38E-03       |
| Hematological Disease                    | 1.38E-03       |
| Hereditary Disorder                      | 1.38E-03       |
| Skeletal and Muscular System Development | 1.38E-03       |
| Tissue Morphology                        | 1.38E-03       |
| Connective Tissue Disorders              | 1.38E-03       |
| Developmental Disorder                   | 1.38E-03       |
| Hereditary Disorder                      | 1.38E-03       |
| Neurological Disease                     | 1.38E-03       |
| Skeletal and Muscular Disorders          | 1.38E-03       |
| Drug Metabolism                          | 1.44E-03       |
| Protein Synthesis                        | 1.44E-03       |
| Molecular Transport                      | 2.75E-03       |
| Small Molecule Biochemistry              | 2.75E-03       |
| Nucleic Acid Metabolism                  | 2.75E-03       |
| Carbohydrate Metabolism                  | 2.75E-03       |
| Carbohydrate Metabolism                  | 2.75E-03       |

| <b>Toxicological Functions</b> | <b>p-value</b> |
|--------------------------------|----------------|
| Renal Inflammation             | 4.12E-03       |
| Renal Nephritis                | 4.12E-03       |
| Cardiac Necrosis/Cell Death    | 4.58E-02       |

| <b>Toxicological Lists</b>             | <b>p-value</b> |
|----------------------------------------|----------------|
| Renal Inorganic Phosphate              | 0.0083         |
| Nongenotoxic Hepatocarcin              | 0.0302         |
| Mitochondrial Dysfunction              | 0.1738         |
| Aryl Hydrocarbon Receptor              | 0.1963         |
| PPAR $\alpha$ /RXR $\alpha$ Activation | 0.2198         |
| Cardiac Necrosis/Cell Death            | 0.2698         |
| NRF2-mediated Oxidative S              | 0.2754         |
| Xenobiotic Metabolism Sign             | 0.3837         |

|                                        |          |
|----------------------------------------|----------|
| Developmental Disorder                 | 2.75E-03 |
| Hematological Disease                  | 2.75E-03 |
| Hereditary Disorder                    | 2.75E-03 |
| Tissue Development                     | 2.75E-03 |
| Cellular Assembly and Organization     | 2.75E-03 |
| Lipid Metabolism                       | 2.75E-03 |
| Small Molecule Biochemistry            | 2.75E-03 |
| Lipid Metabolism                       | 2.75E-03 |
| Small Molecule Biochemistry            | 2.75E-03 |
| Hematological Disease                  | 2.75E-03 |
| Hereditary Disorder                    | 2.75E-03 |
| Hematological Disease                  | 2.75E-03 |
| Hereditary Disorder                    | 2.75E-03 |
| Cellular Assembly and Organization     | 2.75E-03 |
| Tissue Development                     | 2.75E-03 |
| Cell-To-Cell Signaling and Interaction | 2.75E-03 |
| Nervous System Development and F       | 2.75E-03 |
| Infectious Disease                     | 2.75E-03 |
| Amino Acid Metabolism                  | 2.76E-03 |
| Nervous System Development and F       | 3.91E-03 |
| Cell Death and Survival                | 4.12E-03 |
| Cellular Assembly and Organization     | 4.12E-03 |
| Skeletal and Muscular System Devel     | 4.12E-03 |
| Organ Morphology                       | 4.12E-03 |
| Renal and Urological Disease           | 4.12E-03 |
| Inflammatory Disease                   | 4.12E-03 |
| Inflammatory Response                  | 4.12E-03 |
| Carbohydrate Metabolism                | 4.12E-03 |
| Small Molecule Biochemistry            | 4.12E-03 |
| Nucleic Acid Metabolism                | 4.12E-03 |
| Neurological Disease                   | 4.12E-03 |
| Behavior                               | 4.12E-03 |
| Drug Metabolism                        | 4.12E-03 |
| Small Molecule Biochemistry            | 4.12E-03 |
| Amino Acid Metabolism                  | 4.12E-03 |
| Post-Translational Modification        | 4.37E-03 |
| Protein Folding                        | 4.37E-03 |
| Cell Morphology                        | 4.73E-03 |
| Tissue Morphology                      | 4.73E-03 |
| Organ Morphology                       | 4.73E-03 |
| Digestive System Development and       | 4.73E-03 |
| Hepatic System Development and Fu      | 4.73E-03 |
| Behavior                               | 5.37E-03 |
| Digestive System Development and       | 5.37E-03 |
| Organ Morphology                       | 5.49E-03 |
| Digestive System Development and       | 5.49E-03 |
| Hepatic System Development and Fu      | 5.49E-03 |
| Tissue Morphology                      | 5.49E-03 |
| Organ Morphology                       | 5.49E-03 |

|                                           |          |
|-------------------------------------------|----------|
| Cardiovascular System Development         | 5.49E-03 |
| Developmental Disorder                    | 5.49E-03 |
| Neurological Disease                      | 5.49E-03 |
| Cellular Compromise                       | 5.49E-03 |
| Cellular Function and Maintenance         | 5.49E-03 |
| Skeletal and Muscular System Development  | 5.49E-03 |
| Small Molecule Biochemistry               | 5.49E-03 |
| Small Molecule Biochemistry               | 5.49E-03 |
| Amino Acid Metabolism                     | 5.49E-03 |
| Cellular Function and Maintenance         | 5.76E-03 |
| Cell-mediated Immune Response             | 5.76E-03 |
| Cellular Development                      | 5.76E-03 |
| Hematological System Development          | 5.76E-03 |
| Hematopoiesis                             | 5.76E-03 |
| Lymphoid Tissue Structure and Development | 5.76E-03 |
| Nervous System Development and Function   | 6.04E-03 |
| Organ Morphology                          | 6.04E-03 |
| Infectious Disease                        | 6.33E-03 |
| Cancer                                    | 6.33E-03 |
| Reproductive System Disease               | 6.33E-03 |
| Cell-To-Cell Signaling and Interactions   | 6.86E-03 |
| Hematological System Development          | 6.86E-03 |
| Molecular Transport                       | 6.86E-03 |
| Cell Death and Survival                   | 6.86E-03 |
| Molecular Transport                       | 6.86E-03 |
| Cellular Function and Maintenance         | 6.86E-03 |
| Developmental Disorder                    | 6.89E-03 |
| Hereditary Disorder                       | 6.89E-03 |
| Metabolic Disease                         | 6.89E-03 |
| Endocrine System Disorders                | 7.18E-03 |
| Post-Translational Modification           | 7.49E-03 |
| Behavior                                  | 7.85E-03 |
| Digestive System Development and Function | 7.85E-03 |
| Molecular Transport                       | 8.23E-03 |
| Skeletal and Muscular System Development  | 8.23E-03 |
| Tissue Development                        | 8.23E-03 |
| Cellular Development                      | 8.23E-03 |
| Lipid Metabolism                          | 8.23E-03 |
| Small Molecule Biochemistry               | 8.23E-03 |
| Drug Metabolism                           | 8.23E-03 |
| Endocrine System Development and Function | 8.23E-03 |
| Small Molecule Biochemistry               | 8.23E-03 |
| Amino Acid Metabolism                     | 8.23E-03 |
| Carbohydrate Metabolism                   | 8.23E-03 |
| Small Molecule Biochemistry               | 8.23E-03 |
| Renal and Urological Disease              | 8.23E-03 |
| Cancer                                    | 8.23E-03 |
| Cell Death and Survival                   | 8.43E-03 |
| Lipid Metabolism                          | 9.41E-03 |

|                                                       |          |
|-------------------------------------------------------|----------|
| Small Molecule Biochemistry                           | 9.41E-03 |
| Vitamin and Mineral Metabolism                        | 9.41E-03 |
| Behavior                                              | 9.60E-03 |
| Embryonic Development                                 | 9.60E-03 |
| Organismal Development                                | 9.60E-03 |
| Skeletal and Muscular System Development              | 9.60E-03 |
| Tissue Development                                    | 9.60E-03 |
| Connective Tissue Development and Organ Development   | 9.60E-03 |
| Molecular Transport                                   | 9.60E-03 |
| Small Molecule Biochemistry                           | 9.60E-03 |
| Vitamin and Mineral Metabolism                        | 9.60E-03 |
| Cell Signaling                                        | 9.60E-03 |
| Lipid Metabolism                                      | 9.60E-03 |
| Small Molecule Biochemistry                           | 9.60E-03 |
| DNA Replication, Recombination, and Tissue Morphology | 9.60E-03 |
| Nervous System Development and Function               | 9.60E-03 |
| Molecular Transport                                   | 9.75E-03 |
| Small Molecule Biochemistry                           | 9.75E-03 |
| Drug Metabolism                                       | 9.75E-03 |
| Behavior                                              | 1.08E-02 |
| Organ Morphology                                      | 1.10E-02 |
| Embryonic Development                                 | 1.10E-02 |
| Organismal Development                                | 1.10E-02 |
| Cellular Compromise                                   | 1.10E-02 |
| Cellular Function and Maintenance                     | 1.10E-02 |
| Cell-To-Cell Signaling and Interactions               | 1.10E-02 |
| Hematological System Development                      | 1.10E-02 |
| Cellular Growth and Proliferation                     | 1.10E-02 |
| Cellular Development                                  | 1.10E-02 |
| Cancer                                                | 1.10E-02 |
| Organ Development                                     | 1.10E-02 |
| Cellular Growth and Proliferation                     | 1.10E-02 |
| Respiratory Disease                                   | 1.10E-02 |
| Molecular Transport                                   | 1.10E-02 |
| Infectious Disease                                    | 1.10E-02 |
| Neurological Disease                                  | 1.10E-02 |
| Organismal Development                                | 1.10E-02 |
| Cellular Movement                                     | 1.10E-02 |
| Skeletal and Muscular System Development              | 1.14E-02 |
| Nervous System Development and Function               | 1.14E-02 |
| Infectious Disease                                    | 1.22E-02 |
| Molecular Transport                                   | 1.23E-02 |
| Embryonic Development                                 | 1.23E-02 |
| Organismal Development                                | 1.23E-02 |
| Tissue Development                                    | 1.23E-02 |
| Skeletal and Muscular System Development              | 1.23E-02 |
| Tissue Development                                    | 1.23E-02 |

|                                     |          |
|-------------------------------------|----------|
| Cellular Development                | 1.23E-02 |
| Small Molecule Biochemistry         | 1.23E-02 |
| Cellular Function and Maintenance   | 1.23E-02 |
| Carbohydrate Metabolism             | 1.23E-02 |
| Small Molecule Biochemistry         | 1.23E-02 |
| Nucleic Acid Metabolism             | 1.23E-02 |
| Free Radical Scavenging             | 1.23E-02 |
| Organismal Development              | 1.29E-02 |
| Cell Cycle                          | 1.37E-02 |
| Nervous System Development and F    | 1.37E-02 |
| Organ Morphology                    | 1.37E-02 |
| Hematological Disease               | 1.37E-02 |
| Metabolic Disease                   | 1.37E-02 |
| Embryonic Development               | 1.37E-02 |
| Organismal Development              | 1.37E-02 |
| Cellular Compromise                 | 1.37E-02 |
| Cellular Function and Maintenance   | 1.37E-02 |
| Tissue Morphology                   | 1.37E-02 |
| Cell Morphology                     | 1.37E-02 |
| Cellular Assembly and Organization  | 1.37E-02 |
| Small Molecule Biochemistry         | 1.37E-02 |
| Nucleic Acid Metabolism             | 1.37E-02 |
| Embryonic Development               | 1.50E-02 |
| Organismal Development              | 1.50E-02 |
| Tissue Development                  | 1.50E-02 |
| Organismal Development              | 1.50E-02 |
| Tissue Morphology                   | 1.50E-02 |
| Cardiovascular System Development   | 1.50E-02 |
| Embryonic Development               | 1.64E-02 |
| Organismal Development              | 1.64E-02 |
| Developmental Disorder              | 1.64E-02 |
| Hereditary Disorder                 | 1.64E-02 |
| Metabolic Disease                   | 1.64E-02 |
| Renal and Urological Disease        | 1.64E-02 |
| Immunological Disease               | 1.74E-02 |
| Cell Morphology                     | 1.78E-02 |
| Tissue Morphology                   | 1.78E-02 |
| Nervous System Development and F    | 1.78E-02 |
| Molecular Transport                 | 1.78E-02 |
| Small Molecule Biochemistry         | 1.78E-02 |
| Amino Acid Metabolism               | 1.78E-02 |
| Tissue Morphology                   | 1.78E-02 |
| Lipid Metabolism                    | 1.78E-02 |
| Small Molecule Biochemistry         | 1.78E-02 |
| Molecular Transport                 | 1.78E-02 |
| Small Molecule Biochemistry         | 1.78E-02 |
| Amino Acid Metabolism               | 1.78E-02 |
| Behavior                            | 1.84E-02 |
| Organismal Injury and Abnormalities | 1.91E-02 |

|                                           |          |
|-------------------------------------------|----------|
| Renal and Urological Disease              | 1.91E-02 |
| Organismal Injury and Abnormalities       | 1.91E-02 |
| Organismal Development                    | 1.91E-02 |
| Tissue Morphology                         | 1.91E-02 |
| Cardiovascular System Development         | 1.91E-02 |
| Embryonic Development                     | 2.02E-02 |
| Organismal Development                    | 2.02E-02 |
| Cell-To-Cell Signaling and Interactions   | 2.05E-02 |
| Inflammatory Response                     | 2.05E-02 |
| Hematological System Development          | 2.05E-02 |
| Immune Cell Trafficking                   | 2.05E-02 |
| Connective Tissue Disorders               | 2.17E-02 |
| Skeletal and Muscular Disorders           | 2.17E-02 |
| Tissue Morphology                         | 2.18E-02 |
| Tissue Morphology                         | 2.18E-02 |
| Small Molecule Biochemistry               | 2.18E-02 |
| Vitamin and Mineral Metabolism            | 2.18E-02 |
| Cell Signaling                            | 2.18E-02 |
| Molecular Transport                       | 2.18E-02 |
| Small Molecule Biochemistry               | 2.18E-02 |
| Protein Synthesis                         | 2.18E-02 |
| Endocrine System Development and Function | 2.18E-02 |
| Nervous System Development and Function   | 2.32E-02 |
| Organ Morphology                          | 2.32E-02 |
| Embryonic Development                     | 2.32E-02 |
| Organismal Development                    | 2.32E-02 |
| Tissue Development                        | 2.32E-02 |
| Organ Morphology                          | 2.32E-02 |
| Organ Development                         | 2.32E-02 |
| Visual System Development and Function    | 2.32E-02 |
| Protein Synthesis                         | 2.32E-02 |
| Protein Degradation                       | 2.32E-02 |
| Tissue Morphology                         | 2.32E-02 |
| Organ Morphology                          | 2.32E-02 |
| Lymphoid Tissue Structure and Development | 2.32E-02 |
| Skeletal and Muscular Disorders           | 2.32E-02 |
| Lipid Metabolism                          | 2.32E-02 |
| Small Molecule Biochemistry               | 2.32E-02 |
| Hematological System Development          | 2.45E-02 |
| Organismal Functions                      | 2.45E-02 |
| Neurological Disease                      | 2.45E-02 |
| Tissue Morphology                         | 2.45E-02 |
| Molecular Transport                       | 2.45E-02 |
| Small Molecule Biochemistry               | 2.45E-02 |
| Amino Acid Metabolism                     | 2.45E-02 |
| Cellular Development                      | 2.47E-02 |
| Cellular Growth and Proliferation         | 2.47E-02 |
| Cell Morphology                           | 2.58E-02 |
| Cellular Assembly and Organization        | 2.58E-02 |

|                                     |          |
|-------------------------------------|----------|
| Organismal Injury and Abnormalities | 2.58E-02 |
| Dermatological Diseases and Condi   | 2.58E-02 |
| Organ Morphology                    | 2.62E-02 |
| Cardiovascular System Development   | 2.62E-02 |
| Organ Morphology                    | 2.70E-02 |
| Digestive System Development and    | 2.70E-02 |
| Hepatic System Development and Fu   | 2.70E-02 |
| Inflammatory Disease                | 2.72E-02 |
| Dermatological Diseases and Condi   | 2.72E-02 |
| Molecular Transport                 | 2.72E-02 |
| Small Molecule Biochemistry         | 2.72E-02 |
| Nucleic Acid Metabolism             | 2.72E-02 |
| Connective Tissue Disorders         | 2.72E-02 |
| Metabolic Disease                   | 2.72E-02 |
| Skeletal and Muscular Disorders     | 2.72E-02 |
| Nutritional Disease                 | 2.72E-02 |
| Small Molecule Biochemistry         | 2.76E-02 |
| Amino Acid Metabolism               | 2.76E-02 |
| Connective Tissue Disorders         | 2.76E-02 |
| Skeletal and Muscular Disorders     | 2.76E-02 |
| Inflammatory Disease                | 2.76E-02 |
| Immunological Disease               | 2.76E-02 |
| Post-Translational Modification     | 2.85E-02 |
| Hematological Disease               | 2.85E-02 |
| Metabolic Disease                   | 2.85E-02 |
| Molecular Transport                 | 2.85E-02 |
| Small Molecule Biochemistry         | 2.85E-02 |
| Cellular Function and Maintenance   | 2.85E-02 |
| Neurological Disease                | 2.89E-02 |
| Tissue Morphology                   | 2.99E-02 |
| Organ Morphology                    | 2.99E-02 |
| Reproductive System Development a   | 2.99E-02 |
| Molecular Transport                 | 2.99E-02 |
| Small Molecule Biochemistry         | 2.99E-02 |
| Nucleic Acid Metabolism             | 2.99E-02 |
| Cell Death and Survival             | 2.99E-02 |
| Cardiovascular System Development   | 2.99E-02 |
| Molecular Transport                 | 2.99E-02 |
| Lipid Metabolism                    | 2.99E-02 |
| Small Molecule Biochemistry         | 2.99E-02 |
| Drug Metabolism                     | 2.99E-02 |
| Vitamin and Mineral Metabolism      | 2.99E-02 |
| Cell Morphology                     | 2.99E-02 |
| Cellular Function and Maintenance   | 2.99E-02 |
| Organ Morphology                    | 2.99E-02 |
| Endocrine System Development and    | 2.99E-02 |
| Cancer                              | 3.12E-02 |
| Gastrointestinal Disease            | 3.12E-02 |
| Infectious Disease                  | 3.12E-02 |

|                                        |          |
|----------------------------------------|----------|
| Renal and Urological Disease           | 3.25E-02 |
| Cancer                                 | 3.25E-02 |
| Molecular Transport                    | 3.25E-02 |
| Lipid Metabolism                       | 3.25E-02 |
| Small Molecule Biochemistry            | 3.25E-02 |
| Amino Acid Metabolism                  | 3.25E-02 |
| Embryonic Development                  | 3.25E-02 |
| Tissue Morphology                      | 3.25E-02 |
| Cellular Assembly and Organization     | 3.52E-02 |
| Tissue Development                     | 3.65E-02 |
| Cell-To-Cell Signaling and Interaction | 3.65E-02 |
| Reproductive System Development and    | 3.65E-02 |
| Cancer                                 | 3.65E-02 |
| Reproductive System Disease            | 3.65E-02 |
| Neurological Disease                   | 3.65E-02 |
| Skeletal and Muscular Disorders        | 3.65E-02 |
| Inflammatory Disease                   | 3.65E-02 |
| Tissue Morphology                      | 3.70E-02 |
| Embryonic Development                  | 3.79E-02 |
| Organismal Development                 | 3.79E-02 |
| Skeletal and Muscular System Devel     | 3.79E-02 |
| Tissue Development                     | 3.79E-02 |
| Organ Morphology                       | 3.79E-02 |
| Connective Tissue Development and      | 3.79E-02 |
| Organ Development                      | 3.79E-02 |
| Cellular Development                   | 3.79E-02 |
| Hematopoiesis                          | 3.79E-02 |
| Cellular Development                   | 3.92E-02 |
| Hematological System Development       | 3.92E-02 |
| Hematopoiesis                          | 3.92E-02 |
| Cell Cycle                             | 3.92E-02 |
| Protein Synthesis                      | 3.92E-02 |
| Protein Degradation                    | 3.92E-02 |
| Nervous System Development and F       | 4.04E-02 |
| Cell Morphology                        | 4.05E-02 |
| Organ Morphology                       | 4.05E-02 |
| Digestive System Development and       | 4.05E-02 |
| Endocrine System Development and       | 4.05E-02 |
| Organ Morphology                       | 4.05E-02 |
| Digestive System Development and       | 4.05E-02 |
| Endocrine System Development and       | 4.05E-02 |
| Cell Morphology                        | 4.05E-02 |
| Tissue Morphology                      | 4.05E-02 |
| Nervous System Development and F       | 4.05E-02 |
| Organ Morphology                       | 4.05E-02 |
| Behavior                               | 4.05E-02 |
| Cellular Assembly and Organization     | 4.05E-02 |
| Cellular Function and Maintenance      | 4.05E-02 |
| Cell Death and Survival                | 4.17E-02 |



|                                       |          |
|---------------------------------------|----------|
| Hematological Disease                 | 4.18E-02 |
| Endocrine System Disorders            | 4.18E-02 |
| Embryonic Development                 | 4.18E-02 |
| Organismal Development                | 4.18E-02 |
| Protein Synthesis                     | 4.18E-02 |
| Tissue Morphology                     | 4.18E-02 |
| Cardiovascular System Development     | 4.18E-02 |
| Tissue Morphology                     | 4.32E-02 |
| Embryonic Development                 | 4.32E-02 |
| Organismal Development                | 4.32E-02 |
| Tissue Development                    | 4.32E-02 |
| Organ Morphology                      | 4.32E-02 |
| Organ Development                     | 4.32E-02 |
| Visual System Development and Fun     | 4.32E-02 |
| Molecular Transport                   | 4.33E-02 |
| Embryonic Development                 | 4.45E-02 |
| Organismal Development                | 4.45E-02 |
| Tissue Development                    | 4.45E-02 |
| Organ Morphology                      | 4.45E-02 |
| Organ Development                     | 4.45E-02 |
| Visual System Development and Fun     | 4.45E-02 |
| Cell Morphology                       | 4.58E-02 |
| Tissue Morphology                     | 4.58E-02 |
| Cell-To-Cell Signaling and Interactio | 4.58E-02 |
| Nervous System Development and F      | 4.58E-02 |
| Nervous System Development and F      | 4.58E-02 |
| Organ Morphology                      | 4.58E-02 |
| Cell Death and Survival               | 4.58E-02 |
| Inflammatory Response                 | 4.58E-02 |
| Cellular Movement                     | 4.58E-02 |
| Respiratory Disease                   | 4.71E-02 |
| Organismal Injury and Abnormalities   | 4.71E-02 |
| Cellular Development                  | 4.72E-02 |
| Cellular Growth and Proliferation     | 4.72E-02 |
| Cellular Assembly and Organization    | 4.84E-02 |
| Nervous System Development and F      | 4.84E-02 |
| Cellular Function and Maintenance     | 4.84E-02 |
| Nervous System Development and F      | 4.97E-02 |
| Cell Death and Survival               | 4.97E-02 |

| Canonical Pathways                           | pvalue  |
|----------------------------------------------|---------|
| Superpathway of Methionine Degradation       | 0.00347 |
| Caveolar-mediated Endocytosis Signaling      | 0.0049  |
| L-cysteine Degradation II                    | 0.00692 |
| Cysteine Biosynthesis/Homocysteine           | 0.01096 |
| Pentose Phosphate Pathway (Oxidative)        | 0.0138  |
| Methylmalonyl Pathway                        | 0.01622 |
| 2-oxobutanoate Degradation I                 | 0.02291 |
| Lipid Antigen Presentation by CD1            | 0.02692 |
| Pentose Phosphate Pathway                    | 0.0302  |
| γ-linolenate Biosynthesis II (Animals)       | 0.03236 |
| Role of Lipids/Lipid Rafts in the Pathway    | 0.03388 |
| Cysteine Biosynthesis III (mammals)          | 0.04074 |
| Circadian Rhythm Signaling                   | 0.04677 |
| Protein Ubiquitination Pathway               | 0.04898 |
| Antigen Presentation Pathway                 | 0.05012 |
| Amyloid Processing                           | 0.06918 |
| Hypoxia Signaling in the Cardiovascular      | 0.08511 |
| Mitotic Roles of Polo-Like Kinase            | 0.08913 |
| Role of Wnt/GSK-3β Signaling in the          | 0.10209 |
| Prostate Cancer Signaling                    | 0.11194 |
| Nitric Oxide Signaling in the Cardiovascular | 0.11455 |
| Neuregulin Signaling                         | 0.1205  |
| PPAR Signaling                               | 0.1219  |
| Telomerase Signaling                         | 0.12912 |
| PI3K/AKT Signaling                           | 0.16218 |
| Aryl Hydrocarbon Receptor Signaling          | 0.18072 |
| eNOS Signaling                               | 0.18072 |
| Mitochondrial Dysfunction                    | 0.1932  |
| Aldosterone Signaling in Epithelial          | 0.20091 |
| Gap Junction Signaling                       | 0.20749 |
| Wnt/β-catenin Signaling                      | 0.21086 |
| Dopamine-DARPP32 Feedback in the             | 0.21429 |
| Role of NFAT in Regulation of the            | 0.21627 |
| PPARα/RXRα Activation                        | 0.21979 |
| Calcium Signaling                            | 0.22699 |
| Glucocorticoid Receptor Signaling            | 0.30974 |
| Xenobiotic Metabolism Signaling              | 0.32961 |
