# Supplementary material
Source: PubMed Central journal article supplement (PMC4120942)
Supplement: NIHMS592482-supplement-Supplementary_Data_Table_8.pdf [file NIHMS592482-supplement-Supplementary_Data_Table_8.pdf]

**Table S8: Functional Annotation TNT 1.85 mg/L**

| <b>Biological Functions</b>           | <b>p-Value</b> |
|---------------------------------------|----------------|
| Cellular Assembly and Organization    | 2.79E-04       |
| RNA Post-Transcriptional Modification | 2.99E-04       |
| RNA Post-Transcriptional Modification | 3.06E-04       |
| RNA Post-Transcriptional Modification | 3.90E-04       |
| Infectious Disease                    | 5.86E-04       |
| Energy Production                     | 6.64E-04       |
| Small Molecule Biochemistry           | 6.64E-04       |
| Hereditary Disorder                   | 1.01E-03       |
| Ophthalmic Disease                    | 1.01E-03       |
| Hereditary Disorder                   | 1.21E-03       |
| Ophthalmic Disease                    | 1.21E-03       |
| Small Molecule Biochemistry           | 1.66E-03       |
| Drug Metabolism                       | 1.66E-03       |
| Lipid Metabolism                      | 1.66E-03       |
| Vitamin and Mineral Metabolism        | 1.66E-03       |
| RNA Post-Transcriptional Modification | 1.88E-03       |
| Cancer                                | 1.91E-03       |
| Immunological Disease                 | 1.91E-03       |
| Cellular Assembly and Organization    | 2.17E-03       |
| Cell Morphology                       | 2.17E-03       |
| Small Molecule Biochemistry           | 3.40E-03       |
| Nucleic Acid Metabolism               | 3.40E-03       |
| Cellular Assembly and Organization    | 3.75E-03       |
| Hereditary Disorder                   | 4.37E-03       |
| Immunological Disease                 | 4.37E-03       |
| Developmental Disorder                | 4.37E-03       |
| Metabolic Disease                     | 4.37E-03       |
| Hereditary Disorder                   | 4.37E-03       |
| Immunological Disease                 | 4.37E-03       |
| Hereditary Disorder                   | 4.37E-03       |
| Developmental Disorder                | 4.37E-03       |
| Metabolic Disease                     | 4.37E-03       |
| Neurological Disease                  | 4.37E-03       |
| Cell Cycle                            | 4.37E-03       |
| Embryonic Development                 | 4.37E-03       |
| Cell Cycle                            | 4.37E-03       |
| Cell Cycle                            | 4.37E-03       |
| Cellular Development                  | 4.37E-03       |
| Cellular Growth and Proliferation     | 4.37E-03       |
| Cell Cycle                            | 4.37E-03       |
| DNA Replication, Recombination, and   | 4.37E-03       |
| Hereditary Disorder                   | 4.37E-03       |
| Neurological Disease                  | 4.37E-03       |
| Hereditary Disorder                   | 4.37E-03       |
| Neurological Disease                  | 4.37E-03       |
| Carbohydrate Metabolism               | 4.37E-03       |

| <b>Toxicological Functions</b> | <b>p-value</b> |
|--------------------------------|----------------|
| Renal Inflammation             | 4.12E-03       |
| Renal Nephritis                | 4.12E-03       |
| Cardiac Necrosis/Cell Death    | 4.58E-02       |
| Liver Cholestasis              | 7.95E-02       |
| Renal Necrosis/Cell Death      | 8.58E-02       |
| Renal Damage                   | 1.21E-01       |
| Renal Tubule Injury            | 1.21E-01       |
| Kidney Failure                 | 1.50E-01       |
| Liver Steatosis                | 1.74E-01       |
| Liver Steatosis                | 2.85E-01       |

| <b>Toxicological Lists</b>    | <b>p-value</b> |
|-------------------------------|----------------|
| Fatty Acid Metabolism         | 0.01514        |
| Cardiac Necrosis/Cell Death   | 0.01738        |
| Xenobiotic Metabolism Signal  | 0.0182         |
| Glutathione Depletion - CYP I | 0.05129        |
| Increases Renal Proliferation | 0.07943        |
| Nongenotoxic Hepatocarcinog   | 0.0912         |
| Increases Cardiac Dilatation  | 0.11169        |
| CAR/RXR Activation            | 0.1194         |
| Mitochondrial Dysfunction     | 0.1219         |
| Cell Cycle: G2/M DNA Damag    | 0.18621        |
| Cell Cycle: G1/S Checkpoint F | 0.24155        |
| PXR/RXR Activation            | 0.25468        |
| Decreases Transmembrane Pe    | 0.34119        |
| Hepatic Cholestasis           | 0.46881        |
| Aryl Hydrocarbon Receptor Si  | 0.50119        |
| Cardiac Fibrosis              | 0.52723        |
| RAR Activation                | 0.53703        |
| PPARα/RXRα Activation         | 0.54576        |
| NF-κB Signaling               | 0.59704        |

|                                            |          |
|--------------------------------------------|----------|
| Small Molecule Biochemistry                | 4.37E-03 |
| Drug Metabolism                            | 4.37E-03 |
| Vitamin and Mineral Metabolism             | 4.37E-03 |
| Amino Acid Metabolism                      | 4.37E-03 |
| Embryonic Development                      | 4.37E-03 |
| Cell Cycle                                 | 4.37E-03 |
| Hereditary Disorder                        | 4.37E-03 |
| Neurological Disease                       | 4.37E-03 |
| Cellular Assembly and Organization         | 4.37E-03 |
| Cellular Development                       | 4.37E-03 |
| Embryonic Development                      | 4.37E-03 |
| Organ Development                          | 4.37E-03 |
| Organismal Development                     | 4.37E-03 |
| Tissue Development                         | 4.37E-03 |
| Visual System Development and Function     | 4.37E-03 |
| Lymphoid Tissue Structure and Development  | 4.37E-03 |
| Hereditary Disorder                        | 4.37E-03 |
| Developmental Disorder                     | 4.37E-03 |
| Gastrointestinal Disease                   | 4.37E-03 |
| Hepatic System Disease                     | 4.37E-03 |
| Metabolic Disease                          | 4.37E-03 |
| Cellular Movement                          | 4.37E-03 |
| Connective Tissue Development and Function | 4.37E-03 |
| Immunological Disease                      | 4.37E-03 |
| Hematological Disease                      | 4.37E-03 |
| Cancer                                     | 4.37E-03 |
| Cardiovascular Disease                     | 4.37E-03 |
| Skeletal and Muscular Disorders            | 4.37E-03 |
| Hereditary Disorder                        | 4.37E-03 |
| Ophthalmic Disease                         | 4.37E-03 |
| Visual System Development and Function     | 4.37E-03 |
| Cell-To-Cell Signaling and Interaction     | 4.37E-03 |
| Nervous System Development and Function    | 4.37E-03 |
| Cell Death and Survival                    | 4.37E-03 |
| Hereditary Disorder                        | 4.37E-03 |
| Developmental Disorder                     | 4.37E-03 |
| Metabolic Disease                          | 4.37E-03 |
| Renal and Urological Disease               | 4.37E-03 |
| Cell Death and Survival                    | 4.37E-03 |
| Neurological Disease                       | 4.37E-03 |
| Hereditary Disorder                        | 4.37E-03 |
| Metabolic Disease                          | 4.37E-03 |
| Cellular Movement                          | 4.37E-03 |
| Nervous System Development and Function    | 4.37E-03 |
| Cell Death and Survival                    | 4.37E-03 |
| Cellular Assembly and Organization         | 4.37E-03 |
| Cellular Assembly and Organization         | 4.37E-03 |
| Small Molecule Biochemistry                | 4.37E-03 |
| Nucleic Acid Metabolism                    | 4.37E-03 |

|                                               |          |
|-----------------------------------------------|----------|
| Cell-To-Cell Signaling and Interaction        | 4.37E-03 |
| Cell-To-Cell Signaling and Interaction        | 4.37E-03 |
| Hereditary Disorder                           | 4.37E-03 |
| Ophthalmic Disease                            | 4.37E-03 |
| Cellular Assembly and Organization            | 4.37E-03 |
| Cell Morphology                               | 4.37E-03 |
| Hereditary Disorder                           | 4.37E-03 |
| Connective Tissue Disorders                   | 4.37E-03 |
| Developmental Disorder                        | 4.37E-03 |
| Neurological Disease                          | 4.37E-03 |
| Skeletal and Muscular Disorders               | 4.37E-03 |
| Hereditary Disorder                           | 4.37E-03 |
| Developmental Disorder                        | 4.37E-03 |
| Metabolic Disease                             | 4.37E-03 |
| Cellular Assembly and Organization            | 4.37E-03 |
| Post-Translational Modification               | 5.23E-03 |
| Hereditary Disorder                           | 7.38E-03 |
| Developmental Disorder                        | 7.38E-03 |
| Metabolic Disease                             | 7.38E-03 |
| Lymphoid Tissue Structure and Development     | 7.57E-03 |
| Nervous System Development and Function       | 7.57E-03 |
| Behavior                                      | 7.57E-03 |
| Cancer                                        | 7.76E-03 |
| Reproductive System Disease                   | 7.76E-03 |
| Post-Translational Modification               | 8.31E-03 |
| Tissue Morphology                             | 8.72E-03 |
| Small Molecule Biochemistry                   | 8.72E-03 |
| Lipid Metabolism                              | 8.72E-03 |
| Immunological Disease                         | 8.72E-03 |
| Hematological Disease                         | 8.72E-03 |
| Cell Death and Survival                       | 8.72E-03 |
| Hematological System Development and Function | 8.72E-03 |
| Cell Death and Survival                       | 8.72E-03 |
| Hematological System Development and Function | 8.72E-03 |
| Cell Death and Survival                       | 8.72E-03 |
| Hematological System Development and Function | 8.72E-03 |
| Hereditary Disorder                           | 8.72E-03 |
| Ophthalmic Disease                            | 8.72E-03 |
| Developmental Disorder                        | 8.72E-03 |
| Hereditary Disorder                           | 8.72E-03 |
| Metabolic Disease                             | 8.72E-03 |
| Cellular Assembly and Organization            | 8.72E-03 |
| Tissue Development                            | 8.72E-03 |
| Cellular Function and Maintenance             | 8.72E-03 |
| Cell Death and Survival                       | 8.72E-03 |
| Cellular Assembly and Organization            | 8.72E-03 |
| Cell-To-Cell Signaling and Interaction        | 8.72E-03 |
| Tissue Development                            | 8.72E-03 |
| Cellular Function and Maintenance             | 8.72E-03 |

|                                        |          |
|----------------------------------------|----------|
| Cellular Assembly and Organization     | 8.72E-03 |
| Connective Tissue Development and F    | 8.72E-03 |
| Embryonic Development                  | 8.72E-03 |
| Organ Development                      | 8.72E-03 |
| Organismal Development                 | 8.72E-03 |
| Tissue Development                     | 8.72E-03 |
| Skeletal and Muscular System Develo    | 8.72E-03 |
| Cellular Assembly and Organization     | 8.72E-03 |
| Cellular Assembly and Organization     | 8.72E-03 |
| Cancer                                 | 8.72E-03 |
| Embryonic Development                  | 8.72E-03 |
| Cell Death and Survival                | 8.72E-03 |
| Visual System Development and Fund     | 8.72E-03 |
| Hereditary Disorder                    | 8.72E-03 |
| Hematological Disease                  | 8.72E-03 |
| Hereditary Disorder                    | 8.72E-03 |
| Hematological Disease                  | 8.72E-03 |
| Energy Production                      | 8.72E-03 |
| Small Molecule Biochemistry            | 8.72E-03 |
| Drug Metabolism                        | 8.72E-03 |
| Amino Acid Metabolism                  | 8.72E-03 |
| Post-Translational Modification        | 8.72E-03 |
| Energy Production                      | 8.72E-03 |
| Small Molecule Biochemistry            | 8.72E-03 |
| Energy Production                      | 8.72E-03 |
| Small Molecule Biochemistry            | 8.72E-03 |
| Embryonic Development                  | 8.72E-03 |
| Nervous System Development and Fu      | 8.72E-03 |
| Organ Development                      | 8.72E-03 |
| Cellular Assembly and Organization     | 8.72E-03 |
| Cellular Assembly and Organization     | 8.72E-03 |
| Cellular Assembly and Organization     | 8.72E-03 |
| Hematological System Development a     | 8.72E-03 |
| Infectious Disease                     | 8.72E-03 |
| Small Molecule Biochemistry            | 8.72E-03 |
| Lipid Metabolism                       | 8.72E-03 |
| Vitamin and Mineral Metabolism         | 8.72E-03 |
| Behavior                               | 8.72E-03 |
| Cell Death and Survival                | 1.08E-02 |
| Hereditary Disorder                    | 1.20E-02 |
| Neurological Disease                   | 1.20E-02 |
| Protein Trafficking                    | 1.24E-02 |
| Cellular Function and Maintenance      | 1.26E-02 |
| Hematological System Development a     | 1.26E-02 |
| Tissue Morphology                      | 1.30E-02 |
| Small Molecule Biochemistry            | 1.30E-02 |
| Amino Acid Metabolism                  | 1.30E-02 |
| Post-Translational Modification        | 1.30E-02 |
| Cell-To-Cell Signaling and Interaction | 1.30E-02 |

|                                        |          |
|----------------------------------------|----------|
| Connective Tissue Development and F    | 1.30E-02 |
| Embryonic Development                  | 1.30E-02 |
| Organ Development                      | 1.30E-02 |
| Organismal Development                 | 1.30E-02 |
| Tissue Development                     | 1.30E-02 |
| Skeletal and Muscular System Develo    | 1.30E-02 |
| Hereditary Disorder                    | 1.30E-02 |
| Neurological Disease                   | 1.30E-02 |
| Cellular Assembly and Organization     | 1.30E-02 |
| Cell-To-Cell Signaling and Interaction | 1.30E-02 |
| Tissue Development                     | 1.30E-02 |
| Renal and Urological System Develop    | 1.30E-02 |
| Small Molecule Biochemistry            | 1.30E-02 |
| Lipid Metabolism                       | 1.30E-02 |
| Vitamin and Mineral Metabolism         | 1.30E-02 |
| Molecular Transport                    | 1.30E-02 |
| Small Molecule Biochemistry            | 1.30E-02 |
| Lipid Metabolism                       | 1.30E-02 |
| Vitamin and Mineral Metabolism         | 1.30E-02 |
| Molecular Transport                    | 1.30E-02 |
| Embryonic Development                  | 1.30E-02 |
| Organ Development                      | 1.30E-02 |
| Organismal Development                 | 1.30E-02 |
| Tissue Development                     | 1.30E-02 |
| Visual System Development and Func     | 1.30E-02 |
| Connective Tissue Development and F    | 1.30E-02 |
| Embryonic Development                  | 1.30E-02 |
| Organ Development                      | 1.30E-02 |
| Organismal Development                 | 1.30E-02 |
| Tissue Development                     | 1.30E-02 |
| Skeletal and Muscular System Develo    | 1.30E-02 |
| Cellular Assembly and Organization     | 1.30E-02 |
| Cellular Assembly and Organization     | 1.30E-02 |
| Nervous System Development and Fu      | 1.30E-02 |
| Cellular Function and Maintenance      | 1.30E-02 |
| Cell-mediated Immune Response          | 1.30E-02 |
| Inflammatory Response                  | 1.30E-02 |
| Cellular Movement                      | 1.30E-02 |
| Immune Cell Trafficking                | 1.30E-02 |
| Renal and Urological Disease           | 1.30E-02 |
| Inflammatory Disease                   | 1.30E-02 |
| Inflammatory Response                  | 1.30E-02 |
| Neurological Disease                   | 1.30E-02 |
| Behavior                               | 1.30E-02 |
| Cellular Assembly and Organization     | 1.30E-02 |
| Nervous System Development and Fu      | 1.30E-02 |
| Visual System Development and Func     | 1.30E-02 |
| Cell Signaling                         | 1.30E-02 |
| Cellular Assembly and Organization     | 1.30E-02 |

|                                               |          |
|-----------------------------------------------|----------|
| Cell Morphology                               | 1.30E-02 |
| Cellular Assembly and Organization            | 1.30E-02 |
| Hair and Skin Development and Function        | 1.30E-02 |
| Cellular Development                          | 1.32E-02 |
| Embryonic Development                         | 1.32E-02 |
| Organ Development                             | 1.32E-02 |
| Organismal Development                        | 1.32E-02 |
| Tissue Development                            | 1.32E-02 |
| Visual System Development and Function        | 1.32E-02 |
| Cellular Development                          | 1.32E-02 |
| Cellular Growth and Proliferation             | 1.32E-02 |
| Hematological System Development and Function | 1.32E-02 |
| Hereditary Disorder                           | 1.67E-02 |
| Digestive System Development and Function     | 1.74E-02 |
| Hepatic System Development and Function       | 1.74E-02 |
| Organ Morphology                              | 1.74E-02 |
| Small Molecule Biochemistry                   | 1.74E-02 |
| Lipid Metabolism                              | 1.74E-02 |
| Vitamin and Mineral Metabolism                | 1.74E-02 |
| Molecular Transport                           | 1.74E-02 |
| Ophthalmic Disease                            | 1.74E-02 |
| Protein Degradation                           | 1.74E-02 |
| Protein Synthesis                             | 1.74E-02 |
| Cellular Assembly and Organization            | 1.74E-02 |
| Hair and Skin Development and Function        | 1.74E-02 |
| Infectious Disease                            | 1.74E-02 |
| Cell-mediated Immune Response                 | 1.74E-02 |
| Hematopoiesis                                 | 1.74E-02 |
| Hereditary Disorder                           | 1.74E-02 |
| Ophthalmic Disease                            | 1.74E-02 |
| Cancer                                        | 1.74E-02 |
| Immunological Disease                         | 1.74E-02 |
| Carbohydrate Metabolism                       | 1.74E-02 |
| Molecular Transport                           | 1.74E-02 |
| Tumor Morphology                              | 1.74E-02 |
| Cellular Assembly and Organization            | 1.74E-02 |
| Cellular Assembly and Organization            | 1.74E-02 |
| Cell Morphology                               | 1.74E-02 |
| Small Molecule Biochemistry                   | 1.74E-02 |
| Drug Metabolism                               | 1.74E-02 |
| Amino Acid Metabolism                         | 1.74E-02 |
| Cancer                                        | 1.74E-02 |
| Skeletal and Muscular Disorders               | 1.74E-02 |
| Tissue Morphology                             | 1.74E-02 |
| Post-Translational Modification               | 1.79E-02 |
| Protein Synthesis                             | 1.79E-02 |
| Protein Synthesis                             | 1.79E-02 |
| Cell Death and Survival                       | 1.82E-02 |
| Infectious Disease                            | 1.87E-02 |

|                                     |          |
|-------------------------------------|----------|
| Protein Synthesis                   | 1.87E-02 |
| Gene Expression                     | 1.87E-02 |
| Infectious Disease                  | 1.92E-02 |
| Molecular Transport                 | 1.94E-02 |
| RNA Trafficking                     | 1.94E-02 |
| Cancer                              | 2.08E-02 |
| Reproductive System Disease         | 2.08E-02 |
| Endocrine System Disorders          | 2.08E-02 |
| Hematological Disease               | 2.17E-02 |
| Respiratory Disease                 | 2.17E-02 |
| Small Molecule Biochemistry         | 2.17E-02 |
| Cell Morphology                     | 2.17E-02 |
| Embryonic Development               | 2.17E-02 |
| Organ Development                   | 2.17E-02 |
| Organismal Development              | 2.17E-02 |
| Small Molecule Biochemistry         | 2.17E-02 |
| Lipid Metabolism                    | 2.17E-02 |
| Endocrine System Development and F  | 2.17E-02 |
| Cellular Assembly and Organization  | 2.17E-02 |
| Infectious Disease                  | 2.17E-02 |
| Neurological Disease                | 2.17E-02 |
| Inflammatory Disease                | 2.17E-02 |
| Cell Death and Survival             | 2.17E-02 |
| Organ Morphology                    | 2.17E-02 |
| Cancer                              | 2.17E-02 |
| Cell Signaling                      | 2.17E-02 |
| Cellular Assembly and Organization  | 2.17E-02 |
| Cellular Function and Maintenance   | 2.17E-02 |
| Small Molecule Biochemistry         | 2.17E-02 |
| Carbohydrate Metabolism             | 2.17E-02 |
| Molecular Transport                 | 2.17E-02 |
| Small Molecule Biochemistry         | 2.17E-02 |
| Nucleic Acid Metabolism             | 2.17E-02 |
| Small Molecule Biochemistry         | 2.17E-02 |
| Nucleic Acid Metabolism             | 2.17E-02 |
| Cell Signaling                      | 2.17E-02 |
| Protein Synthesis                   | 2.33E-02 |
| Cellular Assembly and Organization  | 2.59E-02 |
| Hair and Skin Development and Funct | 2.59E-02 |
| Inflammatory Response               | 2.59E-02 |
| Cellular Compromise                 | 2.59E-02 |
| Small Molecule Biochemistry         | 2.59E-02 |
| Drug Metabolism                     | 2.59E-02 |
| Lipid Metabolism                    | 2.59E-02 |
| Endocrine System Development and F  | 2.59E-02 |
| Tissue Development                  | 2.59E-02 |
| Inflammatory Response               | 2.59E-02 |
| Cell Morphology                     | 2.59E-02 |
| Embryonic Development               | 2.59E-02 |

|                                            |          |
|--------------------------------------------|----------|
| Organ Development                          | 2.59E-02 |
| Organismal Development                     | 2.59E-02 |
| Tissue Development                         | 2.59E-02 |
| Visual System Development and Function     | 2.59E-02 |
| Tissue Morphology                          | 2.59E-02 |
| Organ Morphology                           | 2.59E-02 |
| Vitamin and Mineral Metabolism             | 2.59E-02 |
| Cell Signaling                             | 2.59E-02 |
| Infectious Disease                         | 2.59E-02 |
| Skeletal and Muscular System Development   | 2.59E-02 |
| Embryonic Development                      | 2.59E-02 |
| Organ Development                          | 2.59E-02 |
| Organismal Development                     | 2.59E-02 |
| Tissue Development                         | 2.59E-02 |
| Visual System Development and Function     | 2.59E-02 |
| Organ Morphology                           | 2.59E-02 |
| Cell Signaling                             | 2.59E-02 |
| Small Molecule Biochemistry                | 2.59E-02 |
| Nucleic Acid Metabolism                    | 2.59E-02 |
| Small Molecule Biochemistry                | 2.59E-02 |
| Drug Metabolism                            | 2.59E-02 |
| Small Molecule Biochemistry                | 2.75E-02 |
| Nucleic Acid Metabolism                    | 2.75E-02 |
| Cell Morphology                            | 3.02E-02 |
| Embryonic Development                      | 3.02E-02 |
| Organ Development                          | 3.02E-02 |
| Organismal Development                     | 3.02E-02 |
| Tissue Development                         | 3.02E-02 |
| Visual System Development and Function     | 3.02E-02 |
| Tissue Morphology                          | 3.02E-02 |
| Organ Morphology                           | 3.02E-02 |
| Tissue Morphology                          | 3.02E-02 |
| Embryonic Development                      | 3.02E-02 |
| Organ Development                          | 3.02E-02 |
| Organismal Development                     | 3.02E-02 |
| Tissue Development                         | 3.02E-02 |
| Auditory and Vestibular System Development | 3.02E-02 |
| Cardiovascular System Development          | 3.02E-02 |
| Cellular Movement                          | 3.02E-02 |
| Small Molecule Biochemistry                | 3.02E-02 |
| Vitamin and Mineral Metabolism             | 3.02E-02 |
| Cell Signaling                             | 3.02E-02 |
| Molecular Transport                        | 3.02E-02 |
| Small Molecule Biochemistry                | 3.02E-02 |
| Nucleic Acid Metabolism                    | 3.02E-02 |
| Cellular Movement                          | 3.02E-02 |
| Connective Tissue Development and Function | 3.02E-02 |
| Skeletal and Muscular System Development   | 3.02E-02 |
| Cellular Movement                          | 3.02E-02 |



|                                        |          |
|----------------------------------------|----------|
| Hematological System Development a     | 3.02E-02 |
| Immune Cell Trafficking                | 3.02E-02 |
| Inflammatory Response                  | 3.02E-02 |
| Behavior                               | 3.02E-02 |
| Cell-To-Cell Signaling and Interaction | 3.02E-02 |
| Hematological System Development a     | 3.02E-02 |
| Cellular Assembly and Organization     | 3.02E-02 |
| Cellular Function and Maintenance      | 3.02E-02 |
| Cellular Assembly and Organization     | 3.02E-02 |
| Cellular Function and Maintenance      | 3.02E-02 |
| Cell Morphology                        | 3.37E-02 |
| Organ Morphology                       | 3.44E-02 |
| Embryonic Development                  | 3.44E-02 |
| Organ Development                      | 3.44E-02 |
| Organismal Development                 | 3.44E-02 |
| Tissue Development                     | 3.44E-02 |
| Visual System Development and Func     | 3.44E-02 |
| Organ Morphology                       | 3.44E-02 |
| Cell Cycle                             | 3.44E-02 |
| Cellular Assembly and Organization     | 3.44E-02 |
| Cellular Function and Maintenance      | 3.44E-02 |
| Molecular Transport                    | 3.44E-02 |
| Carbohydrate Metabolism                | 3.44E-02 |
| Cellular Assembly and Organization     | 3.44E-02 |
| Cell Morphology                        | 3.44E-02 |
| Cellular Development                   | 3.44E-02 |
| Embryonic Development                  | 3.44E-02 |
| Organ Development                      | 3.44E-02 |
| Organismal Development                 | 3.44E-02 |
| Tissue Development                     | 3.44E-02 |
| Visual System Development and Func     | 3.44E-02 |
| Cancer                                 | 3.44E-02 |
| Cellular Development                   | 3.44E-02 |
| Cellular Growth and Proliferation      | 3.44E-02 |
| Organ Development                      | 3.44E-02 |
| Respiratory Disease                    | 3.44E-02 |
| Energy Production                      | 3.44E-02 |
| Small Molecule Biochemistry            | 3.44E-02 |
| Nucleic Acid Metabolism                | 3.44E-02 |
| DNA Replication, Recombination, and    | 3.44E-02 |
| Energy Production                      | 3.44E-02 |
| Small Molecule Biochemistry            | 3.44E-02 |
| Small Molecule Biochemistry            | 3.44E-02 |
| Nucleic Acid Metabolism                | 3.44E-02 |
| Molecular Transport                    | 3.44E-02 |
| Molecular Transport                    | 3.44E-02 |
| Visual System Development and Func     | 3.44E-02 |
| Tissue Morphology                      | 3.44E-02 |
| Cellular Assembly and Organization     | 3.44E-02 |

|                                        |          |
|----------------------------------------|----------|
| Cellular Function and Maintenance      | 3.44E-02 |
| Infectious Disease                     | 3.44E-02 |
| Cellular Assembly and Organization     | 3.44E-02 |
| Cellular Function and Maintenance      | 3.44E-02 |
| Cellular Function and Maintenance      | 3.44E-02 |
| Cellular Growth and Proliferation      | 3.56E-02 |
| Cell-To-Cell Signaling and Interaction | 3.66E-02 |
| Hematological System Development a     | 3.66E-02 |
| Immune Cell Trafficking                | 3.66E-02 |
| Inflammatory Response                  | 3.66E-02 |
| Cancer                                 | 3.67E-02 |
| Infectious Disease                     | 3.67E-02 |
| Cell Morphology                        | 3.86E-02 |
| Embryonic Development                  | 3.86E-02 |
| Nervous System Development and Fu      | 3.86E-02 |
| Organ Development                      | 3.86E-02 |
| Organismal Development                 | 3.86E-02 |
| Tissue Development                     | 3.86E-02 |
| Visual System Development and Func     | 3.86E-02 |
| Tissue Morphology                      | 3.86E-02 |
| Organ Morphology                       | 3.86E-02 |
| DNA Replication, Recombination, and    | 3.86E-02 |
| Cancer                                 | 3.86E-02 |
| Hematological Disease                  | 3.86E-02 |
| Inflammatory Response                  | 3.86E-02 |
| Cellular Compromise                    | 3.86E-02 |
| Behavior                               | 3.86E-02 |
| Visual System Development and Func     | 3.86E-02 |
| Cellular Function and Maintenance      | 3.86E-02 |
| DNA Replication, Recombination, and    | 3.86E-02 |
| Organismal Functions                   | 3.86E-02 |
| Energy Production                      | 3.86E-02 |
| Small Molecule Biochemistry            | 3.86E-02 |
| Lipid Metabolism                       | 3.86E-02 |
| Vitamin and Mineral Metabolism         | 3.86E-02 |
| Energy Production                      | 3.86E-02 |
| Small Molecule Biochemistry            | 3.86E-02 |
| Lipid Metabolism                       | 3.86E-02 |
| Vitamin and Mineral Metabolism         | 3.86E-02 |
| DNA Replication, Recombination, and    | 3.86E-02 |
| Small Molecule Biochemistry            | 3.86E-02 |
| Nucleic Acid Metabolism                | 3.86E-02 |
| Carbohydrate Metabolism                | 3.86E-02 |
| Cellular Movement                      | 3.86E-02 |
| Hematological System Development a     | 3.86E-02 |
| Immune Cell Trafficking                | 3.86E-02 |
| Inflammatory Response                  | 3.86E-02 |
| Visual System Development and Func     | 3.86E-02 |
| Cancer                                 | 4.05E-02 |

|                                               |          |
|-----------------------------------------------|----------|
| Gastrointestinal Disease                      | 4.05E-02 |
| Cell Morphology                               | 4.28E-02 |
| Embryonic Development                         | 4.28E-02 |
| Organ Development                             | 4.28E-02 |
| Organismal Development                        | 4.28E-02 |
| Tissue Development                            | 4.28E-02 |
| Visual System Development and Function        | 4.28E-02 |
| Tissue Morphology                             | 4.28E-02 |
| Organ Morphology                              | 4.28E-02 |
| Organ Morphology                              | 4.28E-02 |
| Cell Morphology                               | 4.28E-02 |
| Embryonic Development                         | 4.28E-02 |
| Organ Development                             | 4.28E-02 |
| Organismal Development                        | 4.28E-02 |
| Tissue Development                            | 4.28E-02 |
| Visual System Development and Function        | 4.28E-02 |
| Tissue Morphology                             | 4.28E-02 |
| Organ Morphology                              | 4.28E-02 |
| Hematological Disease                         | 4.28E-02 |
| Metabolic Disease                             | 4.28E-02 |
| Cell Cycle                                    | 4.28E-02 |
| Cell Morphology                               | 4.28E-02 |
| Embryonic Development                         | 4.28E-02 |
| Organ Development                             | 4.28E-02 |
| Organismal Development                        | 4.28E-02 |
| Hematopoiesis                                 | 4.28E-02 |
| Cellular Development                          | 4.28E-02 |
| Cellular Assembly and Organization            | 4.28E-02 |
| Cell Morphology                               | 4.28E-02 |
| Cellular Development                          | 4.28E-02 |
| Cellular Growth and Proliferation             | 4.28E-02 |
| Hematological System Development and Function | 4.28E-02 |
| Embryonic Development                         | 4.28E-02 |
| Organismal Development                        | 4.28E-02 |
| Tissue Development                            | 4.28E-02 |
| Immunological Disease                         | 4.28E-02 |
| Cancer                                        | 4.28E-02 |
| Hematological Disease                         | 4.28E-02 |
| Cellular Assembly and Organization            | 4.28E-02 |
| Cell Morphology                               | 4.28E-02 |
| Small Molecule Biochemistry                   | 4.28E-02 |
| Drug Metabolism                               | 4.28E-02 |
| Lipid Metabolism                              | 4.28E-02 |
| Vitamin and Mineral Metabolism                | 4.28E-02 |
| Cancer                                        | 4.36E-02 |
| Reproductive System Disease                   | 4.36E-02 |
| Endocrine System Disorders                    | 4.36E-02 |
| Cell Death and Survival                       | 4.57E-02 |
| Cell Morphology                               | 4.70E-02 |

|                                        |          |
|----------------------------------------|----------|
| Cellular Movement                      | 4.70E-02 |
| Hematological System Development a     | 4.70E-02 |
| Cell-mediated Immune Response          | 4.70E-02 |
| Immune Cell Trafficking                | 4.70E-02 |
| Small Molecule Biochemistry            | 4.70E-02 |
| Drug Metabolism                        | 4.70E-02 |
| Lipid Metabolism                       | 4.70E-02 |
| Vitamin and Mineral Metabolism         | 4.70E-02 |
| Molecular Transport                    | 4.70E-02 |
| Embryonic Development                  | 4.70E-02 |
| Organismal Development                 | 4.70E-02 |
| Tissue Development                     | 4.70E-02 |
| Cellular Development                   | 4.70E-02 |
| Embryonic Development                  | 4.70E-02 |
| Lymphoid Tissue Structure and Develo   | 4.70E-02 |
| Organ Development                      | 4.70E-02 |
| Organismal Development                 | 4.70E-02 |
| Tissue Development                     | 4.70E-02 |
| Hematological System Development a     | 4.70E-02 |
| Hematopoiesis                          | 4.70E-02 |
| Cell-To-Cell Signaling and Interaction | 4.70E-02 |
| Hematological System Development a     | 4.70E-02 |
| Immune Cell Trafficking                | 4.70E-02 |
| Inflammatory Response                  | 4.70E-02 |
| Small Molecule Biochemistry            | 4.70E-02 |
| Drug Metabolism                        | 4.70E-02 |
| Vitamin and Mineral Metabolism         | 4.70E-02 |
| Amino Acid Metabolism                  | 4.70E-02 |
| Molecular Transport                    | 4.70E-02 |
| Tissue Morphology                      | 4.70E-02 |
| Cellular Compromise                    | 4.70E-02 |
| Carbohydrate Metabolism                | 4.70E-02 |
| Small Molecule Biochemistry            | 4.70E-02 |
| Drug Metabolism                        | 4.70E-02 |
| Cell-To-Cell Signaling and Interaction | 4.70E-02 |
| Carbohydrate Metabolism                | 4.85E-02 |
| Cellular Assembly and Organization     | 4.89E-02 |
| Cellular Compromise                    | 4.89E-02 |
| Vitamin and Mineral Metabolism         | 5.00E-02 |

| Canonical Pathways                             | pvalue |
|------------------------------------------------|--------|
| Protein Ubiquitination Pathway                 | 2E-06  |
| Formaldehyde Oxidation II (Glutathione-c       | 0.0005 |
| Ethanol Degradation II                         | 0.0009 |
| Noradrenaline and Adrenaline Degradation       | 0.0015 |
| Lipid Antigen Presentation by CD1              | 0.0034 |
| Serotonin Degradation                          | 0.0043 |
| CTLA4 Signaling in Cytotoxic T Lymphocy        | 0.0076 |
| mTOR Signaling                                 | 0.0107 |
| Systemic Lupus Erythematosus Signaling         | 0.0166 |
| Sulfite Oxidation IV                           | 0.0174 |
| Regulation of eIF4 and p70S6K Signaling        | 0.0282 |
| Superpathway of Methionine Degradation         | 0.0316 |
| Pentose Phosphate Pathway (Oxidative Br        | 0.0427 |
| Cyclins and Cell Cycle Regulation              | 0.0468 |
| Heme Degradation                               | 0.0468 |
| EIF2 Signaling                                 | 0.0479 |
| Methylmalonyl Pathway                          | 0.0513 |
| Glycogen Biosynthesis II (from UDP-D-Glu       | 0.0513 |
| Serine Biosynthesis                            | 0.055  |
| Dopamine Receptor Signaling                    | 0.0575 |
| Catecholamine Biosynthesis                     | 0.0631 |
| 2-oxobutanoate Degradation I                   | 0.0724 |
| Fatty Acid $\alpha$ -oxidation                 | 0.0724 |
| Superpathway of Serine and Glycine Biosy       | 0.0759 |
| Pentose Phosphate Pathway                      | 0.0912 |
| Urate Biosynthesis/Inosine 5'-phosphate I      | 0.0955 |
| $\gamma$ -linolenate Biosynthesis II (Animals) | 0.1    |
| Role of Lipids/Lipid Rafts in the Pathogene    | 0.1038 |
| Antiproliferative Role of TOB in T Cell Sigr   | 0.1076 |
| Histamine Degradation                          | 0.1117 |
| Tryptophan Degradation X (Mammalian, v         | 0.1153 |
| Oxidative Ethanol Degradation III              | 0.1153 |
| Putrescine Degradation III                     | 0.1194 |
| Ethanol Degradation IV                         | 0.1194 |
| Xenobiotic Metabolism Signaling                | 0.1315 |
| Glioblastoma Multiforme Signaling              | 0.1413 |
| Cell Cycle Regulation by BTG Family Prote      | 0.1422 |
| Purine Nucleotides Degradation II (Aerobi      | 0.1422 |
| Nucleotide Excision Repair Pathway             | 0.1422 |
| Retinoate Biosynthesis I                       | 0.1459 |
| Mitochondrial Dysfunction                      | 0.1472 |
| Dopamine Degradation                           | 0.1496 |
| Antigen Presentation Pathway                   | 0.1496 |
| Wnt/ $\beta$ -catenin Signaling                | 0.1718 |
| Purine Nucleotides De Novo Biosynthesis        | 0.1718 |
| Cell Cycle: G2/M DNA Damage Checkpoint         | 0.1718 |

|                                                 |        |
|-------------------------------------------------|--------|
| Role of Oct4 in Mammalian Embryonic Ste         | 0.1791 |
| iNOS Signaling                                  | 0.1862 |
| Molecular Mechanisms of Cancer                  | 0.1923 |
| Production of Nitric Oxide and Reactive O       | 0.195  |
| ILK Signaling                                   | 0.1968 |
| Assembly of RNA Polymerase II Complex           | 0.1968 |
| Clathrin-mediated Endocytosis Signaling         | 0.1982 |
| IL-8 Signaling                                  | 0.1982 |
| Semaphorin Signaling in Neurons                 | 0.2037 |
| GABA Receptor Signaling                         | 0.2037 |
| Role of CHK Proteins in Cell Cycle Checkp       | 0.2143 |
| Actin Nucleation by ARP-WASP Complex            | 0.2178 |
| Toll-like Receptor Signaling                    | 0.2178 |
| Retinol Biosynthesis                            | 0.2213 |
| Glioma Invasiveness Signaling                   | 0.2244 |
| Cell Cycle: G1/S Checkpoint Regulation          | 0.235  |
| Phototransduction Pathway                       | 0.235  |
| Protein Kinase A Signaling                      | 0.2404 |
| Role of Osteoblasts, Osteoclasts and Chor       | 0.2529 |
| Mitotic Roles of Polo-Like Kinase               | 0.2547 |
| Huntington's Disease Signaling                  | 0.2594 |
| Erythropoietin Signaling                        | 0.2642 |
| PXR/RXR Activation                              | 0.2679 |
| Basal Cell Carcinoma Signaling                  | 0.2679 |
| IL-10 Signaling                                 | 0.271  |
| FLT3 Signaling in Hematopoietic Progenit        | 0.2773 |
| Ephrin B Signaling                              | 0.2805 |
| Caveolar-mediated Endocytosis Signaling         | 0.2838 |
| Colorectal Cancer Metastasis Signaling          | 0.2871 |
| Role of Wnt/GSK-3 $\beta$ Signaling in the Path | 0.2897 |
| tRNA Charging                                   | 0.2992 |
| Ceramide Signaling                              | 0.3055 |
| Regulation of Actin-based Motility by Rho       | 0.3083 |
| Factors Promoting Cardiogenesis in Vertel       | 0.3177 |
| RANK Signaling in Osteoclasts                   | 0.3206 |
| CDK5 Signaling                                  | 0.3296 |
| HMGB1 Signaling                                 | 0.335  |
| IL-1 Signaling                                  | 0.3381 |
| Virus Entry via Endocytic Pathways              | 0.3412 |
| Mouse Embryonic Stem Cell Pluripotency          | 0.3412 |
| Fcy Receptor-mediated Phagocytosis in M         | 0.3499 |
| Telomerase Signaling                            | 0.3556 |
| T Cell Receptor Signaling                       | 0.3614 |
| HIF1 $\alpha$ Signaling                         | 0.3698 |
| Cholecystokinin/Gastrin-mediated Signali        | 0.3724 |
| Role of NANOG in Mammalian Embryonic            | 0.3802 |
| Role of Macrophages, Fibroblasts and End        | 0.389  |
| Sphingosine-1-phosphate Signaling               | 0.3908 |
| Androgen Signaling                              | 0.3936 |

|                                              |        |
|----------------------------------------------|--------|
| p38 MAPK Signaling                           | 0.4018 |
| Hereditary Breast Cancer Signaling           | 0.4046 |
| 14-3-3-mediated Signaling                    | 0.4074 |
| PTEN Signaling                               | 0.4121 |
| D-myo-inositol (1,4,5,6)-Tetrakisphosphate   | 0.4198 |
| D-myo-inositol (3,4,5,6)-tetrakisphosphate   | 0.4198 |
| p70S6K Signaling                             | 0.4227 |
| Estrogen Receptor Signaling                  | 0.4276 |
| PI3K/AKT Signaling                           | 0.4305 |
| PI3K Signaling in B Lymphocytes              | 0.4426 |
| Ovarian Cancer Signaling                     | 0.4446 |
| Insulin Receptor Signaling                   | 0.455  |
| Human Embryonic Stem Cell Pluripotency       | 0.4571 |
| Cardiac $\beta$ -adrenergic Signaling        | 0.4571 |
| D-myo-inositol-5-phosphate Metabolism        | 0.4624 |
| 3-phosphoinositide Degradation               | 0.4645 |
| Aryl Hydrocarbon Receptor Signaling          | 0.4688 |
| Hepatic Cholestasis                          | 0.4764 |
| AMPK Signaling                               | 0.4764 |
| Synaptic Long Term Depression                | 0.4786 |
| Tight Junction Signaling                     | 0.4898 |
| Gaq Signaling                                | 0.4943 |
| Germ Cell-Sertoli Cell Junction Signaling    | 0.5012 |
| CXCR4 Signaling                              | 0.5035 |
| 3-phosphoinositide Biosynthesis              | 0.5035 |
| Aldosterone Signaling in Epithelial Cells    | 0.5093 |
| NF- $\kappa$ B Signaling                     | 0.52   |
| Dopamine-DARPP32 Feedback in cAMP Signaling  | 0.5346 |
| RhoGDI Signaling                             | 0.5433 |
| PPAR $\alpha$ /RXR $\alpha$ Activation       | 0.5458 |
| RAR Activation                               | 0.5458 |
| NRF2-mediated Oxidative Stress Response      | 0.547  |
| CREB Signaling in Neurons                    | 0.547  |
| Axonal Guidance Signaling                    | 0.5662 |
| ERK/MAPK Signaling                           | 0.5662 |
| Thrombin Signaling                           | 0.5768 |
| Integrin Signaling                           | 0.5781 |
| Breast Cancer Regulation by Stathmin1        | 0.5794 |
| Superpathway of Inositol Phosphate Compounds | 0.597  |
| LPS/IL-1 Mediated Inhibition of RXR Function | 0.6223 |
